# Supplementary material for: Differential expression of zinc finger CCHC-type superfamily proteins in thyroid carcinoma and their associations with tumor immunity
Source: Thyroid Res. 2023 Oct 17;16:42. doi: 10.1186/s13044-023-00185-1 (PMC10580525; doi:10.1186/s13044-023-00185-1)
Supplement: Supplementary file 1 — Supplementary Material 1: Table S1. Primers and their sequences used in the quantitative real-time PCR of ZCCHC gene families [file 13044_2023_185_MOESM1_ESM.xlsx]

## Sheet: Sheet1
Table S1. Primers and their sequences used in the quantitative real-time PCR of ZCCHC Gene Families
Primer name	Primer sequence (5’to 3’)
β-actin-F	AACAGTCCGCCTAGAAGCAC
β-actin-R	CGTTGACATCCGTAAAGACC
ZCCHC2-F	TTGCAGCATGCCATAATCCACA
ZCCHC2-R	GTGGTACAGCTTTGCTTCCTCC
ZCCHC3-F	TGGACGTGGAGGACATTGTGA
ZCCHC3-R	CGGTCCAGATCCAACACACCTGT
ZCCHC4-F	TTGCTGATCGGAGCTGTCAGT
ZCCHC4-R	CAGCTCATGCAACCTTGGTGT
ZCCHC7-F	GGAAAGCTGGATGCTACTGGGA
ZCCHC7-R	GGGCCTCAATGTCTTTGTCACTG
ZCCHC8-F	ATGGCACTGATGGGGAAACAG
ZCCHC8-R	AAGATCCTCCATTCGTCTGGAAT
ZCCHC9-F	GTGGCGGTTGCAAACTTTGTG
ZCCHC9-R	GCGACCAACTGTGACCATTCG
ZCCHC10-F	TTCAGACTCAGATTCCAGCTTCC
ZCCHC10-R	TCTTCTTTGGTGGTTCATCGTCA
ZCCHC12-F	GGCAGTGCTGACTGCAATGTG
ZCCHC12-R	TCCTGAGACTCCACCAGGATCA
ZCCHC14-F	ACCACGTGGATCTGGACTCAG
ZCCHC14-R	GGGATTGCCAGGACTTGGACT
ZCCHC17-F	AGGGACTGGGAAAGACCTTGA
ZCCHC17-R	GGGTGATCTTCTGCCCAGTGT
ZCCHC18-F	CGCCCAGCCAATAGCAATCAG
ZCCHC18-R	AGGGTACAGAGACACCACCAG
ZCCHC24-F	GCTTCGGCGAGTACAAGTC
ZCCHC24-R	TCTCCAGGGGTCTCTGCTTGT
