# Supplementary material for: Differential expression of zinc finger CCHC-type superfamily proteins in thyroid carcinoma and their associations with tumor immunity
Source: Thyroid Res. 2023 Oct 17;16:42. doi: 10.1186/s13044-023-00185-1 (PMC10580525; doi:10.1186/s13044-023-00185-1)
Supplement: Supplementary file 2 — Supplementary Material 2: Table S2. Differential genes and functional enrichment analysis [file 13044_2023_185_MOESM2_ESM.xlsx]

## Sheet: Expression
Table S2. ZCCHC12 expression and its correlation with THCA survival and staging
rownames(datas)	Type	values
TCGA-ET-A2N0-01	G1(n=512)	9.37887
TCGA-FE-A3PA-01	G1(n=512)	8.564
TCGA-EM-A1YC-01	G1(n=512)	1.54656
TCGA-IM-A420-01	G1(n=512)	7.74519
TCGA-FY-A76V-01	G1(n=512)	11.6887
TCGA-EM-A2CR-01	G1(n=512)	3.79299
TCGA-EM-A3FO-01	G1(n=512)	11.514
TCGA-EL-A3H7-01	G1(n=512)	8.26302
TCGA-KS-A4I5-01	G1(n=512)	10.7451
TCGA-MK-A84Z-01	G1(n=512)	9.22551
TCGA-EM-A4FM-01	G1(n=512)	6.92419
TCGA-BJ-A190-01	G1(n=512)	0.866948
TCGA-BJ-A0ZC-01	G1(n=512)	0.227987
TCGA-EM-A4FO-01	G1(n=512)	6.90063
TCGA-DJ-A2PO-01	G1(n=512)	9.21093
TCGA-EL-A3ZT-01	G1(n=512)	9.41724
TCGA-DJ-A3V9-01	G1(n=512)	12.9953
TCGA-ET-A3DV-01	G1(n=512)	2.4775
TCGA-FY-A3NN-01	G1(n=512)	9.58985
TCGA-DJ-A13O-01	G1(n=512)	6.96863
TCGA-EM-A1CW-01	G1(n=512)	3.80019
TCGA-E8-A436-01	G1(n=512)	7.45397
TCGA-DJ-A1QO-01	G1(n=512)	5.72265
TCGA-E3-A3E2-01	G1(n=512)	11.5314
TCGA-E8-A416-01	G1(n=512)	1.42637
TCGA-EL-A3GV-01	G1(n=512)	9.55002
TCGA-ET-A2N3-01	G1(n=512)	1.47405
TCGA-BJ-A2NA-01	G1(n=512)	8.1378
TCGA-DJ-A4V0-01	G1(n=512)	8.28274
TCGA-EL-A3CM-01	G1(n=512)	7.99492
TCGA-EM-A3O3-01	G1(n=512)	9.51627
TCGA-FY-A3TY-01	G1(n=512)	7.09698
TCGA-EL-A3T6-01	G1(n=512)	8.20264
TCGA-ET-A3BO-01	G1(n=512)	9.91353
TCGA-EM-A2OX-01	G1(n=512)	13.3608
TCGA-EL-A3D6-01	G1(n=512)	8.52215
TCGA-J8-A3YF-01	G1(n=512)	8.62306
TCGA-CE-A481-01	G1(n=512)	9.76878
TCGA-E8-A419-01	G1(n=512)	8.2938
TCGA-ET-A25G-01	G1(n=512)	8.70983
TCGA-E8-A438-01	G1(n=512)	9.76081
TCGA-E3-A3E0-01	G1(n=512)	11.9698
TCGA-DE-A0Y3-01	G1(n=512)	9.4122
TCGA-EM-A3FR-01	G1(n=512)	5.4483
TCGA-ET-A3DS-01	G1(n=512)	0.936214
TCGA-DJ-A4UL-01	G1(n=512)	8.39051
TCGA-EM-A2CK-01	G1(n=512)	10.17
TCGA-J8-A3O1-01	G1(n=512)	4.39691
TCGA-FE-A237-01	G1(n=512)	9.31737
TCGA-BJ-A3PT-01	G1(n=512)	7.7941
TCGA-EM-A3O8-01	G1(n=512)	12.087
TCGA-H2-A2K9-01	G1(n=512)	10.4482
TCGA-DJ-A2Q7-01	G1(n=512)	8.88339
TCGA-EL-A3CT-01	G1(n=512)	9.95687
TCGA-DJ-A1QM-01	G1(n=512)	6.68309
TCGA-H2-A3RH-01	G1(n=512)	11.9405
TCGA-IM-A41Z-01	G1(n=512)	8.54368
TCGA-EM-A22O-01	G1(n=512)	8.57461
TCGA-DJ-A4UR-01	G1(n=512)	4.6848
TCGA-IM-A3EB-01	G1(n=512)	11.3115
TCGA-EL-A3ZN-01	G1(n=512)	11.6305
TCGA-FK-A3SH-01	G1(n=512)	13.0758
TCGA-EL-A3ZS-01	G1(n=512)	9.96843
TCGA-EL-A3GR-01	G1(n=512)	10.7943
TCGA-DE-A3KN-01	G1(n=512)	9.67154
TCGA-EM-A3AI-01	G1(n=512)	0.566961
TCGA-ET-A39R-01	G1(n=512)	9.52171
TCGA-DJ-A13X-01	G1(n=512)	9.86827
TCGA-ET-A25O-01	G1(n=512)	7.29862
TCGA-EM-A1YD-01	G1(n=512)	2.31996
TCGA-FE-A22Z-01	G1(n=512)	6.25213
TCGA-BJ-A2N8-01	G1(n=512)	11.6364
TCGA-DJ-A13W-01	G1(n=512)	0.24306
TCGA-EL-A3N2-01	G1(n=512)	9.39456
TCGA-EM-A4FF-01	G1(n=512)	9.86235
TCGA-EL-A3CU-01	G1(n=512)	8.54573
TCGA-J8-A3YD-01	G1(n=512)	8.71463
TCGA-FY-A3YR-01	G1(n=512)	8.80565
TCGA-DJ-A2PV-01	G1(n=512)	9.31728
TCGA-KS-A4I3-01	G1(n=512)	8.28468
TCGA-EM-A1CV-01	G1(n=512)	11.0405
TCGA-BJ-A3PR-01	G1(n=512)	6.11482
TCGA-EM-A3O6-01	G1(n=512)	0.713344
TCGA-BJ-A45J-01	G1(n=512)	9.92695
TCGA-BJ-A28V-01	G1(n=512)	0.388245
TCGA-EM-A3FP-01	G1(n=512)	5.97491
TCGA-EM-A3SY-01	G1(n=512)	0.361544
TCGA-FK-A3S3-01	G1(n=512)	13.1354
TCGA-FY-A3NP-01	G1(n=512)	10.3801
TCGA-E8-A242-01	G1(n=512)	8.83584
TCGA-FY-A3BL-01	G1(n=512)	8.34166
TCGA-EL-A3CR-01	G1(n=512)	7.9204
TCGA-DJ-A13P-01	G1(n=512)	8.42506
TCGA-FE-A239-01	G1(n=512)	1.30609
TCGA-DE-A69K-01	G1(n=512)	10.0858
TCGA-E8-A418-01	G1(n=512)	7.61051
TCGA-EL-A3D0-01	G1(n=512)	8.42574
TCGA-EL-A3D4-01	G1(n=512)	12.0227
TCGA-MK-A4N6-01	G1(n=512)	9.13246
TCGA-E8-A437-01	G1(n=512)	5.96058
TCGA-EM-A3FL-01	G1(n=512)	2.487
TCGA-J8-A3YH-01	G1(n=512)	13.2609
TCGA-E8-A433-01	G1(n=512)	8.60103
TCGA-EL-A4K9-01	G1(n=512)	11.7157
TCGA-E8-A2EA-01	G1(n=512)	8.42823
TCGA-ET-A3BU-01	G1(n=512)	11.1424
TCGA-EL-A4K0-01	G1(n=512)	9.61111
TCGA-EM-A2CM-01	G1(n=512)	4.28421
TCGA-EL-A4K1-01	G1(n=512)	5.19892
TCGA-EL-A3CL-01	G1(n=512)	10.5137
TCGA-DJ-A2PR-01	G1(n=512)	12.4897
TCGA-DJ-A2QA-01	G1(n=512)	8.43064
TCGA-DJ-A3VJ-01	G1(n=512)	10.4883
TCGA-ET-A3DO-01	G1(n=512)	7.3044
TCGA-EM-A2CN-01	G1(n=512)	9.26867
TCGA-DJ-A3UV-01	G1(n=512)	10.6202
TCGA-J8-A3O2-06	G1(n=512)	13.4139
TCGA-IM-A4EB-01	G1(n=512)	8.66267
TCGA-EM-A3OA-01	G1(n=512)	5.11642
TCGA-EL-A3MW-01	G1(n=512)	8.6969
TCGA-FE-A234-01	G1(n=512)	8.50648
TCGA-EM-A2CQ-01	G1(n=512)	4.73306
TCGA-FY-A40K-01	G1(n=512)	8.15235
TCGA-ET-A40P-01	G1(n=512)	9.44456
TCGA-DJ-A1QF-01	G1(n=512)	9.36725
TCGA-EL-A4KH-01	G1(n=512)	10.0695
TCGA-ET-A3BV-01	G1(n=512)	7.00572
TCGA-CE-A27D-01	G1(n=512)	8.72214
TCGA-EL-A4KI-01	G1(n=512)	11.3403
TCGA-KS-A4I7-01	G1(n=512)	10.7915
TCGA-EM-A3SZ-01	G1(n=512)	9.34812
TCGA-DJ-A3VB-01	G1(n=512)	9.38498
TCGA-DJ-A2PP-01	G1(n=512)	6.10585
TCGA-DJ-A4V4-01	G1(n=512)	9.25041
TCGA-EL-A4KG-01	G1(n=512)	6.55359
TCGA-FE-A3PD-01	G1(n=512)	10.9422
TCGA-ET-A40R-01	G1(n=512)	9.16883
TCGA-EM-A4FK-01	G1(n=512)	3.90427
TCGA-DJ-A2PU-01	G1(n=512)	10.4387
TCGA-J8-A3YG-01	G1(n=512)	8.49593
TCGA-BJ-A2N9-01	G1(n=512)	0.461424
TCGA-EM-A22Q-01	G1(n=512)	3.61306
TCGA-FE-A23A-01	G1(n=512)	7.21019
TCGA-EL-A3T2-01	G1(n=512)	10.2455
TCGA-ET-A39K-01	G1(n=512)	11.1899
TCGA-H2-A26U-01	G1(n=512)	7.97132
TCGA-EM-A3AO-01	G1(n=512)	10.1825
TCGA-BJ-A45H-01	G1(n=512)	11.0393
TCGA-J8-A3O0-01	G1(n=512)	11.9811
TCGA-EM-A2P2-01	G1(n=512)	12.9714
TCGA-IM-A3ED-01	G1(n=512)	9.88094
TCGA-BJ-A18Y-01	G1(n=512)	9.69953
TCGA-ET-A40S-01	G1(n=512)	11.0896
TCGA-EL-A4K7-01	G1(n=512)	8.60232
TCGA-EL-A3GZ-01	G1(n=512)	13.7087
TCGA-BJ-A0ZJ-01	G1(n=512)	8.94355
TCGA-BJ-A0ZF-01	G1(n=512)	0.585059
TCGA-FE-A232-01	G1(n=512)	8.08418
TCGA-DJ-A3V4-01	G1(n=512)	9.78742
TCGA-DJ-A3UP-01	G1(n=512)	12.7377
TCGA-DJ-A1QN-01	G1(n=512)	10.7678
TCGA-EM-A3AJ-01	G1(n=512)	1.26574
TCGA-EM-A1YA-01	G1(n=512)	0.385155
TCGA-FY-A3R8-01	G1(n=512)	9.21315
TCGA-BJ-A45K-01	G1(n=512)	0.691981
TCGA-DJ-A3V2-01	G1(n=512)	8.87339
TCGA-J8-A3O2-01	G1(n=512)	12.5766
TCGA-ET-A3BN-01	G1(n=512)	10.8673
TCGA-DJ-A3UU-01	G1(n=512)	11.3853
TCGA-DJ-A3UQ-01	G1(n=512)	9.31264
TCGA-DJ-A3V3-01	G1(n=512)	8.85605
TCGA-FY-A3R9-01	G1(n=512)	6.55974
TCGA-KS-A41J-01	G1(n=512)	9.24794
TCGA-EL-A4K2-01	G1(n=512)	7.70074
TCGA-FY-A3WA-01	G1(n=512)	2.81071
TCGA-DJ-A13S-01	G1(n=512)	8.67667
TCGA-EM-A2P1-06	G1(n=512)	9.85848
TCGA-DJ-A3US-01	G1(n=512)	8.77085
TCGA-ET-A2N4-01	G1(n=512)	10.6913
TCGA-ET-A39N-01	G1(n=512)	0.685537
TCGA-EM-A4FV-01	G1(n=512)	7.90764
TCGA-BJ-A0ZA-01	G1(n=512)	8.81149
TCGA-BJ-A0Z0-01	G1(n=512)	9.17867
TCGA-DJ-A4V5-01	G1(n=512)	9.59658
TCGA-EL-A3H5-01	G1(n=512)	3.97801
TCGA-EL-A3T9-01	G1(n=512)	6.06776
TCGA-J8-A42S-01	G1(n=512)	5.19048
TCGA-EM-A3FM-01	G1(n=512)	8.54333
TCGA-ET-A40T-01	G1(n=512)	9.62189
TCGA-J8-A4HW-01	G1(n=512)	7.73184
TCGA-ET-A25J-01	G1(n=512)	10.5235
TCGA-BJ-A28R-01	G1(n=512)	10.3016
TCGA-BJ-A3F0-01	G1(n=512)	0.949273
TCGA-EL-A3H2-01	G1(n=512)	1.1903
TCGA-E3-A3E1-01	G1(n=512)	9.86786
TCGA-FK-A4UB-01	G1(n=512)	8.26933
TCGA-QD-A8IV-01	G1(n=512)	9.70118
TCGA-DJ-A2QC-01	G1(n=512)	10.0273
TCGA-EL-A3CN-01	G1(n=512)	6.68131
TCGA-DJ-A3UM-01	G1(n=512)	9.74487
TCGA-BJ-A291-01	G1(n=512)	1.40359
TCGA-EL-A3GY-01	G1(n=512)	8.76724
TCGA-DJ-A2PW-01	G1(n=512)	8.94049
TCGA-EM-A2CS-01	G1(n=512)	12.6036
TCGA-EL-A3ZM-01	G1(n=512)	7.56763
TCGA-E8-A417-01	G1(n=512)	6.01802
TCGA-EL-A3MZ-01	G1(n=512)	10.1563
TCGA-FE-A235-01	G1(n=512)	11.5817
TCGA-CE-A483-01	G1(n=512)	8.93925
TCGA-BJ-A45C-01	G1(n=512)	4.92602
TCGA-KS-A41F-01	G1(n=512)	7.80162
TCGA-DJ-A3V0-01	G1(n=512)	6.7749
TCGA-ET-A39S-01	G1(n=512)	10.037
TCGA-EL-A3TB-01	G1(n=512)	9.69598
TCGA-E8-A432-01	G1(n=512)	8.73553
TCGA-ET-A3BT-01	G1(n=512)	7.44323
TCGA-DJ-A3VL-01	G1(n=512)	11.0989
TCGA-ET-A25K-01	G1(n=512)	12.4481
TCGA-ET-A3BS-01	G1(n=512)	9.98539
TCGA-BJ-A45G-01	G1(n=512)	8.52446
TCGA-H2-A421-01	G1(n=512)	7.97099
TCGA-DE-A0XZ-01	G1(n=512)	9.25194
TCGA-BJ-A45I-01	G1(n=512)	7.15321
TCGA-KS-A41I-01	G1(n=512)	4.44701
TCGA-DJ-A2PZ-01	G1(n=512)	6.65268
TCGA-DJ-A3V7-01	G1(n=512)	7.72757
TCGA-EL-A3GO-01	G1(n=512)	1.64718
TCGA-EM-A2CL-01	G1(n=512)	5.37732
TCGA-MK-A4N7-01	G1(n=512)	11.6848
TCGA-DJ-A2Q4-01	G1(n=512)	9.83897
TCGA-EL-A3T7-01	G1(n=512)	9.86498
TCGA-DJ-A3UR-01	G1(n=512)	6.5297
TCGA-CE-A13K-01	G1(n=512)	11.11
TCGA-J8-A4HY-01	G1(n=512)	6.99978
TCGA-DJ-A3V5-01	G1(n=512)	7.71074
TCGA-DJ-A1QQ-01	G1(n=512)	9.86536
TCGA-EL-A3H3-01	G1(n=512)	10.2237
TCGA-DJ-A4UP-01	G1(n=512)	11.4517
TCGA-DE-A7U5-01	G1(n=512)	6.73688
TCGA-EL-A4K6-01	G1(n=512)	10.4606
TCGA-EL-A3MY-01	G1(n=512)	6.22243
TCGA-DJ-A3VA-01	G1(n=512)	9.26633
TCGA-DJ-A4UT-01	G1(n=512)	9.5232
TCGA-ET-A25I-01	G1(n=512)	7.77449
TCGA-BJ-A45E-01	G1(n=512)	0.256648
TCGA-E8-A3X7-01	G1(n=512)	8.27065
TCGA-DJ-A1QH-01	G1(n=512)	7.65492
TCGA-BJ-A0ZB-01	G1(n=512)	9.19773
TCGA-BJ-A3PU-01	G1(n=512)	7.24604
TCGA-EM-A2CT-01	G1(n=512)	7.03797
TCGA-BJ-A192-01	G1(n=512)	1.05109
TCGA-E8-A414-01	G1(n=512)	6.93354
TCGA-FY-A3ON-01	G1(n=512)	8.91301
TCGA-BJ-A28W-01	G1(n=512)	2.01799
TCGA-EL-A3CX-01	G1(n=512)	6.30865
TCGA-DJ-A4V2-01	G1(n=512)	8.24129
TCGA-ET-A39M-01	G1(n=512)	8.19604
TCGA-DJ-A3VM-01	G1(n=512)	6.90783
TCGA-BJ-A28S-01	G1(n=512)	9.76711
TCGA-FK-A3SB-01	G1(n=512)	11.1973
TCGA-H2-A422-01	G1(n=512)	8.37873
TCGA-DJ-A3UT-01	G1(n=512)	8.83379
TCGA-BJ-A0Z5-01	G1(n=512)	9.18158
TCGA-EM-A4FN-01	G1(n=512)	9.16235
TCGA-BJ-A4O9-01	G1(n=512)	10.5593
TCGA-FK-A3SD-01	G1(n=512)	0.300885
TCGA-FY-A40L-01	G1(n=512)	9.73664
TCGA-ET-A3DW-01	G1(n=512)	8.37774
TCGA-FY-A4B0-01	G1(n=512)	4.21288
TCGA-ET-A2MZ-01	G1(n=512)	11.53
TCGA-E8-A2JQ-01	G1(n=512)	6.53845
TCGA-DJ-A3VF-01	G1(n=512)	8.31679
TCGA-ET-A39L-01	G1(n=512)	8.52755
TCGA-EM-A3AP-01	G1(n=512)	5.6683
TCGA-MK-A4N9-01	G1(n=512)	11.9804
TCGA-EM-A22I-01	G1(n=512)	8.81999
TCGA-DJ-A2PN-01	G1(n=512)	8.73943
TCGA-E3-A3DY-01	G1(n=512)	8.97563
TCGA-DJ-A3VD-01	G1(n=512)	4.37448
TCGA-DJ-A2Q3-01	G1(n=512)	8.89781
TCGA-ET-A3DP-01	G1(n=512)	10.5466
TCGA-L6-A4EU-01	G1(n=512)	5.80773
TCGA-EL-A4JW-01	G1(n=512)	7.55075
TCGA-E8-A415-01	G1(n=512)	8.22723
TCGA-BJ-A3EZ-01	G1(n=512)	6.10759
TCGA-ET-A3DU-01	G1(n=512)	6.75693
TCGA-DJ-A3UZ-01	G1(n=512)	10.7809
TCGA-FK-A3SE-01	G1(n=512)	10.2333
TCGA-DJ-A2PY-01	G1(n=512)	9.29363
TCGA-DE-A69J-01	G1(n=512)	10.4173
TCGA-EL-A3GP-01	G1(n=512)	3.93346
TCGA-DJ-A3UO-01	G1(n=512)	13.6273
TCGA-EL-A4K4-01	G1(n=512)	6.47288
TCGA-ET-A39I-01	G1(n=512)	10.598
TCGA-DE-A4MB-01	G1(n=512)	8.47099
TCGA-EL-A3CZ-01	G1(n=512)	10.2442
TCGA-DJ-A1QG-01	G1(n=512)	7.04756
TCGA-GE-A2C6-01	G1(n=512)	11.7618
TCGA-DJ-A3UN-01	G1(n=512)	12.1166
TCGA-BJ-A0YZ-01	G1(n=512)	0.586501
TCGA-EL-A3ZP-01	G1(n=512)	8.69264
TCGA-J8-A3YE-01	G1(n=512)	10.7621
TCGA-DJ-A13T-01	G1(n=512)	11.6768
TCGA-EM-A3FQ-01	G1(n=512)	6.77509
TCGA-DE-A4MD-06	G1(n=512)	4.3475
TCGA-EL-A3CP-01	G1(n=512)	8.39824
TCGA-DJ-A3UY-01	G1(n=512)	8.00166
TCGA-EM-A3O7-01	G1(n=512)	8.04499
TCGA-FE-A230-01	G1(n=512)	8.52964
TCGA-EL-A3H1-01	G1(n=512)	3.91316
TCGA-IM-A3U2-01	G1(n=512)	7.72891
TCGA-DJ-A2PS-01	G1(n=512)	11.516
TCGA-EM-A2CU-01	G1(n=512)	10.0369
TCGA-EM-A1CU-01	G1(n=512)	10.9995
TCGA-ET-A4KN-01	G1(n=512)	5.03485
TCGA-ET-A40Q-01	G1(n=512)	7.86068
TCGA-EL-A3ZH-01	G1(n=512)	9.83055
TCGA-ET-A3BQ-01	G1(n=512)	11.7617
TCGA-FY-A3R7-01	G1(n=512)	9.99637
TCGA-ET-A3BX-01	G1(n=512)	8.66741
TCGA-DJ-A2Q2-01	G1(n=512)	4.49422
TCGA-DJ-A1QE-01	G1(n=512)	7.70302
TCGA-EL-A3ZL-01	G1(n=512)	9.26942
TCGA-EM-A2CS-06	G1(n=512)	12.1635
TCGA-DJ-A13U-01	G1(n=512)	8.02049
TCGA-DJ-A2Q5-01	G1(n=512)	10.3734
TCGA-EL-A4JZ-01	G1(n=512)	9.4678
TCGA-EM-A22N-01	G1(n=512)	1.71857
TCGA-BJ-A2N7-01	G1(n=512)	11.383
TCGA-J8-A4HW-06	G1(n=512)	9.33655
TCGA-DJ-A1QD-01	G1(n=512)	9.8787
TCGA-BJ-A0ZE-01	G1(n=512)	7.58702
TCGA-EM-A4FH-01	G1(n=512)	1.16459
TCGA-BJ-A45D-01	G1(n=512)	7.48566
TCGA-ET-A2MX-01	G1(n=512)	5.42092
TCGA-EL-A3CW-01	G1(n=512)	5.12028
TCGA-EM-A3AN-01	G1(n=512)	9.14219
TCGA-CE-A482-01	G1(n=512)	11.0626
TCGA-BJ-A0ZH-01	G1(n=512)	8.06877
TCGA-EM-A3ST-01	G1(n=512)	11.1007
TCGA-BJ-A290-01	G1(n=512)	12.9396
TCGA-FY-A3I5-01	G1(n=512)	4.94347
TCGA-FY-A4B4-01	G1(n=512)	8.40271
TCGA-FY-A4B3-01	G1(n=512)	8.90993
TCGA-FY-A3RA-01	G1(n=512)	10.6365
TCGA-DJ-A2QB-01	G1(n=512)	8.50791
TCGA-ET-A39P-01	G1(n=512)	6.52538
TCGA-DE-A0Y2-01	G1(n=512)	10.8755
TCGA-BJ-A0ZG-01	G1(n=512)	0.721504
TCGA-DJ-A2PQ-01	G1(n=512)	8.2074
TCGA-EL-A3ZR-01	G1(n=512)	10.0663
TCGA-DJ-A3VG-01	G1(n=512)	9.71852
TCGA-E8-A434-01	G1(n=512)	5.76121
TCGA-DJ-A2Q6-01	G1(n=512)	11.033
TCGA-DJ-A2Q1-01	G1(n=512)	2.45631
TCGA-DJ-A13R-01	G1(n=512)	0.278461
TCGA-EM-A2P3-01	G1(n=512)	9.31685
TCGA-BJ-A28T-01	G1(n=512)	5.64565
TCGA-ET-A39O-01	G1(n=512)	8.25384
TCGA-EL-A3T1-01	G1(n=512)	6.14641
TCGA-EL-A3CO-01	G1(n=512)	3.54573
TCGA-E8-A44M-01	G1(n=512)	9.20541
TCGA-EM-A1CS-01	G1(n=512)	8.23603
TCGA-CE-A485-01	G1(n=512)	9.59676
TCGA-BJ-A0Z3-01	G1(n=512)	7.64891
TCGA-EL-A3ZK-01	G1(n=512)	5.95441
TCGA-EM-A3FJ-01	G1(n=512)	9.26088
TCGA-DJ-A4UQ-01	G1(n=512)	11.6778
TCGA-E8-A44K-01	G1(n=512)	8.14418
TCGA-KS-A4IC-01	G1(n=512)	8.27357
TCGA-EM-A1YB-01	G1(n=512)	1.92193
TCGA-EL-A3H8-01	G1(n=512)	7.28067
TCGA-BJ-A191-01	G1(n=512)	7.67774
TCGA-FY-A2QD-01	G1(n=512)	1.13389
TCGA-DJ-A2PT-01	G1(n=512)	7.52299
TCGA-FY-A40M-01	G1(n=512)	10.4397
TCGA-EM-A2OZ-01	G1(n=512)	7.38832
TCGA-BJ-A28X-01	G1(n=512)	9.19769
TCGA-EL-A3GW-01	G1(n=512)	11.6988
TCGA-BJ-A0Z2-01	G1(n=512)	8.5565
TCGA-EM-A3FQ-06	G1(n=512)	9.19794
TCGA-IM-A41Y-01	G1(n=512)	11.1027
TCGA-DJ-A13L-01	G1(n=512)	6.01221
TCGA-DO-A1JZ-01	G1(n=512)	13.5064
TCGA-ET-A25L-01	G1(n=512)	9.39444
TCGA-EL-A3MX-01	G1(n=512)	9.9696
TCGA-FY-A3W9-01	G1(n=512)	7.98794
TCGA-ET-A2MY-01	G1(n=512)	9.36392
TCGA-EL-A3T8-01	G1(n=512)	9.32588
TCGA-ET-A25R-01	G1(n=512)	8.80146
TCGA-DJ-A1QL-01	G1(n=512)	1.82952
TCGA-L6-A4ET-01	G1(n=512)	8.24881
TCGA-ET-A25P-01	G1(n=512)	10.1608
TCGA-E3-A3E5-01	G1(n=512)	11.2058
TCGA-EM-A3FK-01	G1(n=512)	11.1455
TCGA-EL-A3GU-01	G1(n=512)	9.2006
TCGA-H2-A3RI-01	G1(n=512)	7.97105
TCGA-DJ-A3V8-01	G1(n=512)	9.88172
TCGA-EM-A3SU-06	G1(n=512)	10.2672
TCGA-DJ-A2Q9-01	G1(n=512)	3.44751
TCGA-EL-A3CV-01	G1(n=512)	6.96235
TCGA-BJ-A45F-01	G1(n=512)	4.23547
TCGA-KS-A41L-01	G1(n=512)	0.423955
TCGA-J8-A3NZ-01	G1(n=512)	9.05252
TCGA-DO-A1K0-01	G1(n=512)	8.74587
TCGA-E3-A3DZ-01	G1(n=512)	8.09305
TCGA-EM-A3SX-01	G1(n=512)	7.20852
TCGA-DJ-A3VI-01	G1(n=512)	8.0634
TCGA-ET-A39J-01	G1(n=512)	11.711
TCGA-DJ-A1QI-01	G1(n=512)	9.57738
TCGA-EL-A3N3-01	G1(n=512)	6.88561
TCGA-L6-A4EP-01	G1(n=512)	10.8144
TCGA-DJ-A13V-01	G1(n=512)	11.8984
TCGA-DE-A2OL-01	G1(n=512)	4.09044
TCGA-FY-A3I4-01	G1(n=512)	9.03735
TCGA-EM-A4FQ-01	G1(n=512)	9.90068
TCGA-EM-A2P1-01	G1(n=512)	7.99102
TCGA-EM-A2OV-01	G1(n=512)	2.22799
TCGA-EL-A3GQ-01	G1(n=512)	9.69991
TCGA-EL-A4JV-01	G1(n=512)	8.93007
TCGA-EL-A3T3-01	G1(n=512)	8.81533
TCGA-CE-A3ME-01	G1(n=512)	8.07645
TCGA-DJ-A3VK-01	G1(n=512)	11.4245
TCGA-EL-A3D1-01	G1(n=512)	11.1155
TCGA-BJ-A0Z9-01	G1(n=512)	8.38804
TCGA-E3-A3E3-01	G1(n=512)	8.40962
TCGA-KS-A4ID-01	G1(n=512)	5.42738
TCGA-FY-A40N-01	G1(n=512)	11.035
TCGA-BJ-A18Z-01	G1(n=512)	8.93354
TCGA-EL-A3ZO-01	G1(n=512)	8.55948
TCGA-FE-A233-01	G1(n=512)	8.92332
TCGA-DJ-A4UW-01	G1(n=512)	10.4297
TCGA-DE-A4M8-01	G1(n=512)	8.53494
TCGA-EM-A3AL-01	G1(n=512)	0.763242
TCGA-J8-A3YH-06	G1(n=512)	12.9595
TCGA-FE-A236-01	G1(n=512)	9.58475
TCGA-4C-A93U-01	G1(n=512)	8.66809
TCGA-BJ-A28Z-01	G1(n=512)	8.24675
TCGA-EM-A3AK-01	G1(n=512)	10.4889
TCGA-EL-A3CS-01	G1(n=512)	6.16092
TCGA-FY-A3R6-01	G1(n=512)	9.75186
TCGA-KS-A4I9-01	G1(n=512)	6.40338
TCGA-EM-A2CJ-01	G1(n=512)	0.741057
TCGA-CE-A484-01	G1(n=512)	5.88621
TCGA-ET-A25M-01	G1(n=512)	9.18137
TCGA-DO-A2HM-01	G1(n=512)	6.75375
TCGA-DJ-A13M-01	G1(n=512)	8.72771
TCGA-ET-A3BP-01	G1(n=512)	8.16096
TCGA-EL-A3TA-01	G1(n=512)	9.49694
TCGA-EM-A22J-01	G1(n=512)	6.39065
TCGA-IM-A3U3-01	G1(n=512)	10.7449
TCGA-EM-A2CP-01	G1(n=512)	3.90887
TCGA-EM-A22L-01	G1(n=512)	8.86813
TCGA-DE-A4M9-01	G1(n=512)	3.20627
TCGA-DJ-A3UK-01	G1(n=512)	10.0232
TCGA-DE-A4MC-01	G1(n=512)	8.83288
TCGA-EL-A3T0-01	G1(n=512)	10.5716
TCGA-ET-A3BW-01	G1(n=512)	12.7612
TCGA-EL-A3ZQ-01	G1(n=512)	8.79927
TCGA-E8-A413-01	G1(n=512)	6.70444
TCGA-DJ-A3V6-01	G1(n=512)	7.3119
TCGA-EM-A22P-01	G1(n=512)	9.25548
TCGA-FK-A3SG-01	G1(n=512)	10.0296
TCGA-DJ-A2Q0-01	G1(n=512)	0.227002
TCGA-BJ-A4O8-01	G1(n=512)	10.4718
TCGA-EM-A22M-01	G1(n=512)	8.74339
TCGA-DE-A4MA-01	G1(n=512)	8.89348
TCGA-DE-A4MD-01	G1(n=512)	4.00551
TCGA-EL-A3CY-01	G1(n=512)	8.52607
TCGA-FE-A3PB-01	G1(n=512)	6.84221
TCGA-EM-A3AR-01	G1(n=512)	10.5737
TCGA-EM-A3OB-01	G1(n=512)	11.519
TCGA-DJ-A3UX-01	G1(n=512)	11.0667
TCGA-KS-A4I1-01	G1(n=512)	11.7529
TCGA-EL-A3ZG-01	G1(n=512)	9.55568
TCGA-ET-A2N5-01	G1(n=512)	9.45926
TCGA-ET-A3DT-01	G1(n=512)	7.20636
TCGA-EL-A3GX-01	G1(n=512)	7.64026
TCGA-EM-A2OW-01	G1(n=512)	1.26586
TCGA-EM-A2CO-01	G1(n=512)	1.53122
TCGA-EM-A22K-01	G1(n=512)	8.87926
TCGA-DJ-A3VE-01	G1(n=512)	9.01668
TCGA-BJ-A2P4-01	G1(n=512)	8.49851
TCGA-EM-A4FU-01	G1(n=512)	7.74408
TCGA-FE-A3PC-01	G1(n=512)	8.40905
TCGA-EM-A3SU-01	G1(n=512)	10.4838
TCGA-EM-A4G1-01	G1(n=512)	7.09104
TCGA-KS-A4IB-01	G1(n=512)	9.70178
TCGA-ET-A3DR-01	G1(n=512)	8.76363
TCGA-EM-A2OY-01	G1(n=512)	1.56023
TCGA-ET-A39T-01	G1(n=512)	7.1047
TCGA-EM-A1YE-01	G1(n=512)	0.766722
TCGA-ET-A25N-01	G1(n=512)	12.075
TCGA-CE-A3MD-01	G1(n=512)	9.6297
TCGA-L6-A4EQ-01	G1(n=512)	10.1429
TCGA-EM-A3FN-01	G1(n=512)	0.557091
TCGA-FY-A3NM-01	G1(n=512)	3.0567
TCGA-DJ-A2PX-01	G1(n=512)	9.50076
TCGA-EM-A2P0-01	G1(n=512)	10.0629
TCGA-EL-A3GS-01	G1(n=512)	8.8394
TCGA-EM-A1CT-01	G1(n=512)	8.02404
TCGA-EM-A4FR-01	G1(n=512)	8.24501
TCGA-EL-A4KD-01	G1(n=512)	9.27976
TCGA-ET-A4KQ-01	G1(n=512)	11.7372
TCGA-FE-A231-01	G1(n=512)	7.32137
TCGA-EL-A3H4-01	G1(n=512)	10.6195
TCGA-FE-A238-01	G1(n=512)	8.17462
TCGA-DJ-A3UW-01	G1(n=512)	6.26106
TCGA-EM-A3AQ-01	G1(n=512)	11.2243
TCGA-EL-A4JX-01	G1(n=512)	7.446
TCGA-EL-A3D5-01	G1(n=512)	1.63803
TCGA-ET-A3DQ-01	G1(n=512)	9.73542
TCGA-ET-A3DW-11	Normal(n=712)	6.69487
TCGA-EL-A3TA-11	Normal(n=712)	2.06726
TCGA-EL-A3T7-11	Normal(n=712)	1.04789
TCGA-BJ-A3PR-11	Normal(n=712)	1.6173
TCGA-DO-A1JZ-11	Normal(n=712)	2.33994
TCGA-BJ-A28W-11	Normal(n=712)	2.28537
TCGA-BJ-A28R-11	Normal(n=712)	1.76647
TCGA-KS-A41I-11	Normal(n=712)	1.26969
TCGA-EL-A3ZG-11	Normal(n=712)	3.67376
TCGA-BJ-A2N7-11	Normal(n=712)	4.28815
TCGA-EL-A3ZQ-11	Normal(n=712)	2.69646
TCGA-EM-A1CV-11	Normal(n=712)	3.28551
TCGA-BJ-A290-11	Normal(n=712)	1.94171
TCGA-EL-A3ZO-11	Normal(n=712)	2.90858
TCGA-EL-A3T8-11	Normal(n=712)	3.32746
TCGA-H2-A3RI-11	Normal(n=712)	0.82489
TCGA-EL-A3N2-11	Normal(n=712)	3.06981
TCGA-BJ-A28X-11	Normal(n=712)	2.30696
TCGA-EM-A1YC-11	Normal(n=712)	0.669027
TCGA-EL-A3MX-11	Normal(n=712)	1.30755
TCGA-ET-A2N5-11	Normal(n=712)	1.6219
TCGA-EL-A3T2-11	Normal(n=712)	4.40119
TCGA-GE-A2C6-11	Normal(n=712)	4.66989
TCGA-ET-A3DP-11	Normal(n=712)	3.41261
TCGA-BJ-A3PU-11	Normal(n=712)	1.55292
TCGA-EL-A3ZH-11	Normal(n=712)	2.16063
TCGA-EL-A3ZP-11	Normal(n=712)	2.31519
TCGA-EL-A3H2-11	Normal(n=712)	1.00892
TCGA-EM-A1CU-11	Normal(n=712)	3.32759
TCGA-EL-A3T3-11	Normal(n=712)	0.536451
TCGA-H2-A2K9-11	Normal(n=712)	2.22308
TCGA-EM-A3ST-11	Normal(n=712)	2.04226
TCGA-EL-A3H7-11	Normal(n=712)	2.47651
TCGA-EL-A3T6-11	Normal(n=712)	2.87556
TCGA-EL-A3MY-11	Normal(n=712)	6.96415
TCGA-EL-A3TB-11	Normal(n=712)	1.35361
TCGA-FY-A3TY-11	Normal(n=712)	0.418676
TCGA-EL-A3T0-11	Normal(n=712)	2.92296
TCGA-BJ-A2N8-11	Normal(n=712)	4.46632
TCGA-BJ-A2NA-11	Normal(n=712)	2.04715
TCGA-EM-A1CS-11	Normal(n=712)	0.588517
TCGA-EL-A3ZR-11	Normal(n=712)	2.67154
TCGA-EL-A3ZS-11	Normal(n=712)	4.40579
TCGA-EM-A1CW-11	Normal(n=712)	1.32233
TCGA-ET-A2MX-11	Normal(n=712)	1.6439
TCGA-EL-A3ZT-11	Normal(n=712)	1.26159
TCGA-KS-A41L-11	Normal(n=712)	2.70144
TCGA-KS-A41J-11	Normal(n=712)	3.16192
TCGA-EM-A1CT-11	Normal(n=712)	1.99179
TCGA-E8-A2JQ-11	Normal(n=712)	1.88924
TCGA-EL-A3N3-11	Normal(n=712)	2.90574
TCGA-EL-A3H1-11	Normal(n=712)	1.15646
TCGA-EL-A3T1-11	Normal(n=712)	2.69357
TCGA-EL-A3MW-11	Normal(n=712)	0.876173
TCGA-EL-A3ZM-11	Normal(n=712)	1.53551
TCGA-BJ-A2N9-11	Normal(n=712)	0.890096
TCGA-EL-A3ZL-11	Normal(n=712)	3.04177
TCGA-EL-A3GZ-11	Normal(n=712)	1.00597
TCGA-EL-A3ZK-11	Normal(n=712)	1.98382
GTEX-111CU-0226-SM-5GZXC	Normal(n=712)	2.60881
GTEX-111FC-1026-SM-5GZX1	Normal(n=712)	0.478092
GTEX-111VG-0526-SM-5N9BW	Normal(n=712)	0.0254257
GTEX-111YS-0726-SM-5GZY8	Normal(n=712)	4.46858
GTEX-1122O-0226-SM-5N9DA	Normal(n=712)	1.86631
GTEX-1128S-0126-SM-5H12S	Normal(n=712)	1.57483
GTEX-113JC-0126-SM-5EGJW	Normal(n=712)	4.05918
GTEX-117XS-0526-SM-5987Q	Normal(n=712)	2.13685
GTEX-117YW-0126-SM-5EGGN	Normal(n=712)	0.580628
GTEX-117YX-1226-SM-5H11S	Normal(n=712)	6.51885
GTEX-1192W-0126-SM-5EGGS	Normal(n=712)	1.44573
GTEX-1192X-1126-SM-5EGGU	Normal(n=712)	2.14274
GTEX-11DXX-0226-SM-5P9HL	Normal(n=712)	2.8744
GTEX-11DXY-0426-SM-5H12R	Normal(n=712)	2.98094
GTEX-11DXZ-0926-SM-5N9CG	Normal(n=712)	0.834549
GTEX-11DYG-0826-SM-5N9GH	Normal(n=712)	3.65878
GTEX-11DZ1-2726-SM-5A5KH	Normal(n=712)	1.24489
GTEX-11EI6-0726-SM-59866	Normal(n=712)	1.00288
GTEX-11EM3-0126-SM-5985K	Normal(n=712)	3.04719
GTEX-11EMC-0226-SM-5EGLP	Normal(n=712)	0.297133
GTEX-11EQ8-0826-SM-5N9FG	Normal(n=712)	0.933799
GTEX-11EQ9-0626-SM-5A5K1	Normal(n=712)	1.48954
GTEX-11GS4-0826-SM-5986J	Normal(n=712)	3.90881
GTEX-11GSO-0626-SM-5A5LW	Normal(n=712)	5.08958
GTEX-11GSP-0126-SM-5A5KU	Normal(n=712)	1.77905
GTEX-11I78-0526-SM-5986A	Normal(n=712)	2.79223
GTEX-11LCK-0526-SM-5A5M9	Normal(n=712)	0.869003
GTEX-11NSD-0126-SM-5987F	Normal(n=712)	1.62947
GTEX-11NUK-1026-SM-5HL5J	Normal(n=712)	1.72203
GTEX-11NV4-0626-SM-5N9BR	Normal(n=712)	0.983167
GTEX-11O72-2326-SM-5BC7H	Normal(n=712)	1.19598
GTEX-11OF3-0626-SM-5BC4Y	Normal(n=712)	0.812046
GTEX-11P7K-0226-SM-5986Z	Normal(n=712)	1.48182
GTEX-11P81-0126-SM-5HL5Y	Normal(n=712)	0.66421
GTEX-11P82-0226-SM-5HL4O	Normal(n=712)	0.827982
GTEX-11TT1-1126-SM-5P9GV	Normal(n=712)	1.14535
GTEX-11TTK-0826-SM-5N9EG	Normal(n=712)	0.394185
GTEX-11TUW-0226-SM-5LU8X	Normal(n=712)	1.78241
GTEX-11UD2-0626-SM-5GU6L	Normal(n=712)	1.10299
GTEX-11VI4-0226-SM-5GU6C	Normal(n=712)	2.86572
GTEX-11XUK-0226-SM-5EQLW	Normal(n=712)	5.09761
GTEX-11ZTS-1126-SM-5LU9X	Normal(n=712)	1.59359
GTEX-11ZTT-1026-SM-5EQKF	Normal(n=712)	5.74443
GTEX-11ZVC-0126-SM-5986G	Normal(n=712)	0.372061
GTEX-1211K-0726-SM-5FQUW	Normal(n=712)	0.295488
GTEX-1212Z-0426-SM-5FQT6	Normal(n=712)	0.615699
GTEX-12584-0826-SM-5FQSK	Normal(n=712)	0.320542
GTEX-12696-0326-SM-5EGL4	Normal(n=712)	0.409907
GTEX-1269C-0226-SM-5EGKS	Normal(n=712)	1.96162
GTEX-12BJ1-0426-SM-5FQSO	Normal(n=712)	4.97591
GTEX-12WSC-0826-SM-5EQ5Q	Normal(n=712)	0.781486
GTEX-12WSD-0926-SM-5GCNL	Normal(n=712)	0.761711
GTEX-12WSE-1226-SM-73KUF	Normal(n=712)	0.961994
GTEX-12WSG-0226-SM-5EGIF	Normal(n=712)	0.488515
GTEX-12WSH-0226-SM-5GCOG	Normal(n=712)	3.17776
GTEX-12WSJ-0326-SM-5GCMT	Normal(n=712)	0.477574
GTEX-12WSK-0926-SM-5CVNQ	Normal(n=712)	0.858618
GTEX-12WSL-0626-SM-5GCOY	Normal(n=712)	1.64293
GTEX-12WSN-0726-SM-5GCMS	Normal(n=712)	2.37212
GTEX-12ZZX-1226-SM-5EGHS	Normal(n=712)	0.200755
GTEX-12ZZY-0826-SM-5EQMT	Normal(n=712)	0.321004
GTEX-12ZZZ-1226-SM-59HK1	Normal(n=712)	0.513693
GTEX-13111-0226-SM-5EQ55	Normal(n=712)	1.20289
GTEX-13112-0326-SM-5P9IW	Normal(n=712)	0.540722
GTEX-13113-0126-SM-5LZVX	Normal(n=712)	5.46271
GTEX-1313W-0726-SM-5EGK1	Normal(n=712)	0.463413
GTEX-131XE-0126-SM-5LZVC	Normal(n=712)	2.80674
GTEX-131XF-1826-SM-5EGKG	Normal(n=712)	4.50526
GTEX-131XG-0226-SM-5IFG1	Normal(n=712)	3.13603
GTEX-131XH-0526-SM-5DUX7	Normal(n=712)	0.711054
GTEX-131YS-0726-SM-5P9G9	Normal(n=712)	0.252658
GTEX-132AR-1126-SM-5P9GA	Normal(n=712)	0.189034
GTEX-132NY-1026-SM-5P9IY	Normal(n=712)	0.306612
GTEX-132QS-0326-SM-5IJFN	Normal(n=712)	1.68392
GTEX-133LE-0326-SM-5P9G4	Normal(n=712)	1.24306
GTEX-1399R-0126-SM-5IFEV	Normal(n=712)	1.97049
GTEX-1399T-0126-SM-5KM15	Normal(n=712)	2.79161
GTEX-1399U-0326-SM-5P9G5	Normal(n=712)	2.98841
GTEX-139T6-0326-SM-5J2LY	Normal(n=712)	3.35797
GTEX-139TS-0126-SM-5K7XJ	Normal(n=712)	4.42425
GTEX-139UW-0126-SM-5KM1B	Normal(n=712)	1.94748
GTEX-139YR-1226-SM-5IFEU	Normal(n=712)	0.238542
GTEX-13CF3-0926-SM-5LZZC	Normal(n=712)	1.13093
GTEX-13D11-0226-SM-5LZXL	Normal(n=712)	1.36849
GTEX-13FH7-0126-SM-5KLZ1	Normal(n=712)	1.88714
GTEX-13FHO-0926-SM-5N9EW	Normal(n=712)	0.314871
GTEX-13FHP-0926-SM-5L3EC	Normal(n=712)	0.15562
GTEX-13FLV-0226-SM-5J2OF	Normal(n=712)	0.437228
GTEX-13FLW-0326-SM-5J2M4	Normal(n=712)	1.62947
GTEX-13FTW-0626-SM-5IFEX	Normal(n=712)	1.82293
GTEX-13FTY-0726-SM-5J2OH	Normal(n=712)	0.53077
GTEX-13FXS-0726-SM-5LZXJ	Normal(n=712)	1.35445
GTEX-13G51-1226-SM-5K7Z3	Normal(n=712)	0.559149
GTEX-13IVO-0926-SM-5KLZP	Normal(n=712)	0.518535
GTEX-13JVG-0926-SM-5IJE1	Normal(n=712)	5.05441
GTEX-13N11-1026-SM-5K7XQ	Normal(n=712)	0.606158
GTEX-13N1W-0826-SM-5MR5J	Normal(n=712)	7.4363
GTEX-13N2G-0726-SM-5MR38	Normal(n=712)	3.42237
GTEX-13NYB-0726-SM-5MR4J	Normal(n=712)	0.139077
GTEX-13NYC-2426-SM-5MR3K	Normal(n=712)	4.40463
GTEX-13NZ8-0226-SM-5J2OK	Normal(n=712)	2.12135
GTEX-13NZ9-1126-SM-5MR37	Normal(n=712)	0.375623
GTEX-13NZA-1026-SM-5MR48	Normal(n=712)	4.02503
GTEX-13O1R-0826-SM-5J2MB	Normal(n=712)	0.704341
GTEX-13O21-2226-SM-5MR3L	Normal(n=712)	2.57846
GTEX-13O3O-0926-SM-5KM1F	Normal(n=712)	1.83188
GTEX-13O3P-0726-SM-5J2OM	Normal(n=712)	1.16543
GTEX-13O3Q-0626-SM-5IJG1	Normal(n=712)	0.914641
GTEX-13O61-0226-SM-5KM52	Normal(n=712)	2.24458
GTEX-13OVG-0226-SM-5LU93	Normal(n=712)	2.44201
GTEX-13OVI-0826-SM-5KLZ8	Normal(n=712)	0.973207
GTEX-13OVJ-0626-SM-5J2O2	Normal(n=712)	1.35671
GTEX-13OVK-0226-SM-6M472	Normal(n=712)	0.995376
GTEX-13OW5-0626-SM-5J2N2	Normal(n=712)	2.17505
GTEX-13OW6-0726-SM-5L3FX	Normal(n=712)	0.856149
GTEX-13OW7-0826-SM-5L3EL	Normal(n=712)	1.04404
GTEX-13OW8-0126-SM-5IJE5	Normal(n=712)	3.58015
GTEX-13PDP-1026-SM-5L3FA	Normal(n=712)	1.08814
GTEX-13PL6-1026-SM-5L3E5	Normal(n=712)	0.247685
GTEX-13PVQ-0726-SM-5L3GI	Normal(n=712)	2.05797
GTEX-13PVR-0626-SM-5S2RC	Normal(n=712)	1.81639
GTEX-13QBU-0626-SM-5J2OG	Normal(n=712)	2.88714
GTEX-13QJ3-0926-SM-73KX5	Normal(n=712)	0.601031
GTEX-13QJC-0826-SM-5RQKC	Normal(n=712)	2.40299
GTEX-13RTJ-0326-SM-5YYAE	Normal(n=712)	3.11237
GTEX-13RTK-0326-SM-5RQHS	Normal(n=712)	0.961549
GTEX-13S86-1126-SM-5RQJX	Normal(n=712)	1.12234
GTEX-13U4I-0526-SM-5LU59	Normal(n=712)	0.0797297
GTEX-13VXT-0626-SM-5SIA1	Normal(n=712)	2.58808
GTEX-13VXU-0826-SM-5KLZ2	Normal(n=712)	0.411643
GTEX-13W46-0926-SM-5LU3T	Normal(n=712)	1
GTEX-13X6H-0526-SM-5LU4Q	Normal(n=712)	0.974382
GTEX-13X6J-0826-SM-5LU32	Normal(n=712)	0.847676
GTEX-13YAN-0926-SM-5O9C3	Normal(n=712)	1.95308
GTEX-144GL-1226-SM-5O9A4	Normal(n=712)	0.998845
GTEX-144GM-0226-SM-5Q5CB	Normal(n=712)	1.08882
GTEX-144GO-0126-SM-5LUAO	Normal(n=712)	1.64016
GTEX-145LT-0226-SM-5S2QK	Normal(n=712)	3.64731
GTEX-145LU-0426-SM-5O9AH	Normal(n=712)	0.581785
GTEX-145ME-0126-SM-5S2QM	Normal(n=712)	1.40054
GTEX-145MG-0826-SM-5Q5C2	Normal(n=712)	0.956874
GTEX-145MH-0426-SM-5LU8T	Normal(n=712)	0.935535
GTEX-145MI-1126-SM-5O9AK	Normal(n=712)	0.617393
GTEX-146FQ-0726-SM-5LUA7	Normal(n=712)	1.74416
GTEX-146FR-0326-SM-5SI8U	Normal(n=712)	4.2426
GTEX-14753-0926-SM-5Q5BI	Normal(n=712)	2.68818
GTEX-1477Z-0226-SM-5TDCI	Normal(n=712)	2.42465
GTEX-147F4-0826-SM-5QGRB	Normal(n=712)	2.13258
GTEX-147GR-0726-SM-5S2PL	Normal(n=712)	0.37829
GTEX-148VI-0526-SM-5TDDG	Normal(n=712)	0.301119
GTEX-148VJ-0726-SM-5LU8J	Normal(n=712)	0.796265
GTEX-1497J-0126-SM-5Q5BK	Normal(n=712)	3.41981
GTEX-14A5H-0726-SM-5Q5DW	Normal(n=712)	3.38585
GTEX-14A6H-2426-SM-5Q5BO	Normal(n=712)	0.45249
GTEX-14ABY-0926-SM-5Q5DY	Normal(n=712)	0.432425
GTEX-14AS3-0226-SM-5Q5B6	Normal(n=712)	0.773406
GTEX-14ASI-0726-SM-5Q5DC	Normal(n=712)	0.272143
GTEX-14B4R-0126-SM-5TDE4	Normal(n=712)	3.53978
GTEX-14BIN-0126-SM-5TDCG	Normal(n=712)	0.869477
GTEX-14BMU-0226-SM-5S2QA	Normal(n=712)	4.47314
GTEX-14BMV-0726-SM-73KVE	Normal(n=712)	1.41576
GTEX-14C38-0826-SM-5S2U8	Normal(n=712)	0.109976
GTEX-14C39-0226-SM-5TDDW	Normal(n=712)	0.382391
GTEX-14C5O-0826-SM-5TDEG	Normal(n=712)	0.511063
GTEX-14DAQ-0826-SM-73KWT	Normal(n=712)	0.900876
GTEX-14E6C-2626-SM-5RQJP	Normal(n=712)	0.857822
GTEX-14E6E-0326-SM-73KY6	Normal(n=712)	2.62504
GTEX-14E7W-0926-SM-5YYA4	Normal(n=712)	0.301236
GTEX-14ICK-1626-SM-6ETZX	Normal(n=712)	1.12697
GTEX-14ICL-0426-SM-5RQJ3	Normal(n=712)	2.58135
GTEX-14JG6-1326-SM-9OSXU	Normal(n=712)	1.4782
GTEX-14JIY-1226-SM-6871R	Normal(n=712)	0.412836
GTEX-14PHW-2926-SM-6AJBA	Normal(n=712)	0.544881
GTEX-14PII-0826-SM-6871S	Normal(n=712)	2.13816
GTEX-14PJ3-0126-SM-69LQP	Normal(n=712)	3.53356
GTEX-14PJ4-0326-SM-664OT	Normal(n=712)	1.95643
GTEX-14PJ6-0326-SM-6871H	Normal(n=712)	2.4489
GTEX-14PJM-1326-SM-664NX	Normal(n=712)	1.36177
GTEX-14PJO-0626-SM-6LLHH	Normal(n=712)	0.299831
GTEX-14PK6-0426-SM-6EU1J	Normal(n=712)	1.19975
GTEX-14PKU-0326-SM-6AJA7	Normal(n=712)	0.244278
GTEX-14PKV-0626-SM-6AJA2	Normal(n=712)	2.04928
GTEX-14PN3-0826-SM-69LOS	Normal(n=712)	1.02574
GTEX-14PN4-1526-SM-6871V	Normal(n=712)	0.556405
GTEX-14PQA-1226-SM-6M47A	Normal(n=712)	0.559639
GTEX-14XAO-0426-SM-6AJB6	Normal(n=712)	2.63645
GTEX-15CHC-0126-SM-5YYBA	Normal(n=712)	0.448372
GTEX-15CHQ-0826-SM-69LOT	Normal(n=712)	0.497229
GTEX-15CHR-1726-SM-7DUGW	Normal(n=712)	2.30071
GTEX-15D1Q-0626-SM-6AJAZ	Normal(n=712)	0.294782
GTEX-15DDE-0626-SM-69LOK	Normal(n=712)	0.133642
GTEX-15DZA-0226-SM-7KFS6	Normal(n=712)	2.27322
GTEX-15EO6-0126-SM-6LPKJ	Normal(n=712)	1.98368
GTEX-15ER7-0726-SM-7KUMF	Normal(n=712)	0.326077
GTEX-15ETS-0526-SM-6PAN3	Normal(n=712)	2.45549
GTEX-15EU6-1426-SM-6M48E	Normal(n=712)	3.34398
GTEX-15FZZ-0226-SM-6LLI4	Normal(n=712)	0.6072
GTEX-15G19-0626-SM-6M474	Normal(n=712)	2.57362
GTEX-15G1A-0326-SM-6M467	Normal(n=712)	2.91284
GTEX-15RIE-0426-SM-7KUMH	Normal(n=712)	4.02591
GTEX-15RIF-0326-SM-7KUFR	Normal(n=712)	1.35163
GTEX-15RJ7-0326-SM-6M47H	Normal(n=712)	2.35473
GTEX-15RJE-1326-SM-6LPI6	Normal(n=712)	0.637564
GTEX-15SB6-1526-SM-7KUMQ	Normal(n=712)	0.62527
GTEX-15SHU-0726-SM-7KUFI	Normal(n=712)	0.762731
GTEX-15SHV-0426-SM-6M476	Normal(n=712)	1.37016
GTEX-15UF6-1126-SM-6LPJ3	Normal(n=712)	2.848
GTEX-169BO-0326-SM-7EPIM	Normal(n=712)	3.00845
GTEX-16AAH-0326-SM-7DHML	Normal(n=712)	4.40803
GTEX-16BQI-0726-SM-6LPJZ	Normal(n=712)	1.28392
GTEX-16GPK-0926-SM-6LPJ9	Normal(n=712)	0.25689
GTEX-16MT8-0626-SM-6M47Q	Normal(n=712)	2.35868
GTEX-16MTA-0726-SM-7KUL4	Normal(n=712)	3.81558
GTEX-16NGA-0326-SM-718AJ	Normal(n=712)	3.48543
GTEX-16NPX-1426-SM-6LPK3	Normal(n=712)	1.04194
GTEX-16XZY-0726-SM-79OMU	Normal(n=712)	0.493032
GTEX-16XZZ-0826-SM-7IGM3	Normal(n=712)	2.55262
GTEX-16YQH-0326-SM-6LPJV	Normal(n=712)	0.754203
GTEX-16Z82-0426-SM-7EPGX	Normal(n=712)	1.58832
GTEX-178AV-0726-SM-6LPJI	Normal(n=712)	1.6036
GTEX-17EVP-0126-SM-7EPHW	Normal(n=712)	1.18903
GTEX-17EVQ-0526-SM-7KFSK	Normal(n=712)	0.608715
GTEX-17F96-0526-SM-79OLE	Normal(n=712)	1.71501
GTEX-17F97-0626-SM-7IGOH	Normal(n=712)	3.72137
GTEX-17F9E-0626-SM-79ON5	Normal(n=712)	1.55778
GTEX-17F9Y-0526-SM-7EWDC	Normal(n=712)	0.60521
GTEX-17GQL-0226-SM-7LTAK	Normal(n=712)	4.08321
GTEX-17HG3-0226-SM-7EWEA	Normal(n=712)	0.270708
GTEX-17HGU-0826-SM-7EWE5	Normal(n=712)	0.0773934
GTEX-17HHE-0426-SM-79OK3	Normal(n=712)	0.489851
GTEX-17HHY-0826-SM-7EPID	Normal(n=712)	0.606158
GTEX-17HII-1926-SM-79OLB	Normal(n=712)	4.43162
GTEX-17JCI-0626-SM-7IGM7	Normal(n=712)	3.46336
GTEX-17KNJ-1026-SM-79ONK	Normal(n=712)	1.32193
GTEX-17MF6-0626-SM-7LT8D	Normal(n=712)	0.241596
GTEX-183FY-0626-SM-79OKR	Normal(n=712)	3.18094
GTEX-183WM-2626-SM-7KFRY	Normal(n=712)	0.934781
GTEX-18465-1426-SM-7KFTF	Normal(n=712)	0.395721
GTEX-18A66-0826-SM-72D5Z	Normal(n=712)	3.22466
GTEX-18A67-0826-SM-7KFTI	Normal(n=712)	0.665666
GTEX-18A6Q-0726-SM-7LT8Y	Normal(n=712)	0.832769
GTEX-18A7A-0826-SM-7KFTJ	Normal(n=712)	0.228234
GTEX-18D9A-0126-SM-7KFSI	Normal(n=712)	1.80777
GTEX-18D9B-0726-SM-72D6K	Normal(n=712)	2.24732
GTEX-18D9U-1026-SM-72D5R	Normal(n=712)	5.34199
GTEX-18QFQ-0726-SM-7LG6D	Normal(n=712)	0.914718
GTEX-1A3MV-0326-SM-73KW7	Normal(n=712)	3.08559
GTEX-1A8FM-0726-SM-7DUGK	Normal(n=712)	0.65581
GTEX-1A8G6-0626-SM-7IGNB	Normal(n=712)	4.17951
GTEX-1A8G7-1026-SM-73KVA	Normal(n=712)	3.67243
GTEX-1AMEY-0126-SM-73KTX	Normal(n=712)	1.23695
GTEX-1AMFI-0526-SM-7189M	Normal(n=712)	3.26664
GTEX-1AX8Z-0826-SM-7DUFZ	Normal(n=712)	1.25278
GTEX-1AX9I-0626-SM-72D54	Normal(n=712)	0.636636
GTEX-1AX9J-2126-SM-731DD	Normal(n=712)	1.45628
GTEX-1AX9K-0626-SM-73KVD	Normal(n=712)	4.59395
GTEX-1AYCT-0226-SM-73KVB	Normal(n=712)	0.644687
GTEX-1B8KE-0626-SM-7189H	Normal(n=712)	7.3672
GTEX-1B8KZ-0426-SM-731DP	Normal(n=712)	1.56852
GTEX-1B8L1-1626-SM-7IGMH	Normal(n=712)	0.196985
GTEX-1B8SF-0626-SM-73KVV	Normal(n=712)	0.728487
GTEX-1B8SG-1126-SM-7IGMT	Normal(n=712)	1.32769
GTEX-1B932-0926-SM-73KUP	Normal(n=712)	0.486766
GTEX-1B933-1026-SM-7P8RO	Normal(n=712)	1.45786
GTEX-1B97I-0326-SM-7DUGB	Normal(n=712)	3.06729
GTEX-1B97J-0626-SM-7P8RU	Normal(n=712)	2.81619
GTEX-1BAJH-0926-SM-79OO6	Normal(n=712)	0.336283
GTEX-1C2JI-0326-SM-7EWFD	Normal(n=712)	3.01578
GTEX-1C475-0226-SM-7MGXM	Normal(n=712)	3.13898
GTEX-1C4CL-0726-SM-7IGP9	Normal(n=712)	0.247685
GTEX-1C64N-1026-SM-79ONM	Normal(n=712)	0.724301
GTEX-1C6VQ-0526-SM-7MGWD	Normal(n=712)	0.457227
GTEX-1C6VR-0426-SM-7IGN6	Normal(n=712)	0.332393
GTEX-1C6VS-0826-SM-7EWEI	Normal(n=712)	0.835116
GTEX-1CAMQ-1126-SM-7EWFE	Normal(n=712)	2.79805
GTEX-1CAMR-0226-SM-7DUGO	Normal(n=712)	6.363
GTEX-1CAMS-0826-SM-7P8P1	Normal(n=712)	0.520045
GTEX-1CB4E-0326-SM-7MXT3	Normal(n=712)	2.08712
GTEX-1CB4F-0826-SM-793CV	Normal(n=712)	0.999134
GTEX-1CB4G-1526-SM-7P8QG	Normal(n=712)	0.452174
GTEX-1CB4H-0126-SM-7IGN2	Normal(n=712)	0.63951
GTEX-1CB4I-0726-SM-7DUGS	Normal(n=712)	3.58015
GTEX-1CB4J-1426-SM-7MKFR	Normal(n=712)	2.39067
GTEX-1E1VI-0726-SM-7P8QJ	Normal(n=712)	2.53207
GTEX-1EH9U-0926-SM-7EWF1	Normal(n=712)	1.146
GTEX-1EKGG-0726-SM-7IGPX	Normal(n=712)	0.331476
GTEX-1EMGI-0826-SM-7EPHY	Normal(n=712)	1.07861
GTEX-1EN7A-1026-SM-7IGPZ	Normal(n=712)	0.925772
GTEX-1EU9M-0626-SM-7MXUT	Normal(n=712)	0.546857
GTEX-1EWIQ-0826-SM-7MXTH	Normal(n=712)	0.511164
GTEX-1EX96-0126-SM-9KNVH	Normal(n=712)	2.37573
GTEX-1F48J-0926-SM-7P8PZ	Normal(n=712)	0.35242
GTEX-1F52S-0526-SM-7P8TP	Normal(n=712)	0.438719
GTEX-1F5PL-0826-SM-7MXU7	Normal(n=712)	1.66993
GTEX-1F6IF-1126-SM-9KNV2	Normal(n=712)	2.04159
GTEX-1F75A-0326-SM-7MXTR	Normal(n=712)	0.94043
GTEX-1F75B-0826-SM-9QEIT	Normal(n=712)	0.747946
GTEX-1F75I-0926-SM-7MXUU	Normal(n=712)	2.10969
GTEX-1F88F-0726-SM-7P8R7	Normal(n=712)	0.704341
GTEX-1FIGZ-0226-SM-7P8QR	Normal(n=712)	4.84649
GTEX-1GF9U-0226-SM-7P8TY	Normal(n=712)	1.81721
GTEX-1GF9V-0926-SM-9KNW7	Normal(n=712)	1.5064
GTEX-1GF9W-0626-SM-7MXVJ	Normal(n=712)	1.85639
GTEX-1GF9X-0126-SM-A9G38	Normal(n=712)	0.506907
GTEX-1GL5R-0626-SM-7PBZY	Normal(n=712)	3.01881
GTEX-1GMR3-0726-SM-9WPOF	Normal(n=712)	1.43776
GTEX-1GMR8-0826-SM-9KNUR	Normal(n=712)	1.31441
GTEX-1GMRU-1126-SM-9KNV1	Normal(n=712)	0.36446
GTEX-1GN1U-0826-SM-9WPPX	Normal(n=712)	0.782996
GTEX-1GN1V-0626-SM-7P8QU	Normal(n=712)	0.675274
GTEX-1GN1W-0126-SM-7MXV7	Normal(n=712)	3.91265
GTEX-1GN2E-0826-SM-9WYT8	Normal(n=712)	3.65992
GTEX-1GN73-0826-SM-9OSW4	Normal(n=712)	3.86096
GTEX-1GPI7-0726-SM-9WG84	Normal(n=712)	1.04754
GTEX-1GTWX-0726-SM-9WPPA	Normal(n=712)	2.47041
GTEX-1GZ2Q-0826-SM-7P8TK	Normal(n=712)	1.35614
GTEX-1GZ4H-0226-SM-9JGGJ	Normal(n=712)	0.72718
GTEX-1GZ4I-0626-SM-9WPPN	Normal(n=712)	0.886589
GTEX-1GZHY-1426-SM-9WG5H	Normal(n=712)	0.256407
GTEX-1H11D-0626-SM-9WPQ1	Normal(n=712)	2.60928
GTEX-1H1CY-0726-SM-9OSXX	Normal(n=712)	0.0690009
GTEX-1H1DE-0226-SM-ARZN8	Normal(n=712)	3.10685
GTEX-1H1DF-1026-SM-9QEJ1	Normal(n=712)	1.53157
GTEX-1H1DG-0726-SM-A96TN	Normal(n=712)	0.414785
GTEX-1H1E6-0326-SM-9OSWE	Normal(n=712)	2.80839
GTEX-1H1ZS-0726-SM-A9G3K	Normal(n=712)	0.206393
GTEX-1H2FU-0626-SM-9WPPS	Normal(n=712)	2.123
GTEX-1H3VE-0826-SM-9KNVQ	Normal(n=712)	0.462366
GTEX-1HB9E-0826-SM-CNNQJ	Normal(n=712)	1.1177
GTEX-1HBPH-0926-SM-A9SME	Normal(n=712)	1.45312
GTEX-1HBPI-0826-SM-9WYTX	Normal(n=712)	1.18078
GTEX-1HBPM-0926-SM-ARL9C	Normal(n=712)	1.8484
GTEX-1HBPN-1226-SM-B2LW9	Normal(n=712)	4.74362
GTEX-1HC8U-1226-SM-9WYUW	Normal(n=712)	0.300651
GTEX-1HCU7-0826-SM-B2LX7	Normal(n=712)	1.33056
GTEX-1HCU9-0226-SM-9WPNT	Normal(n=712)	2.95028
GTEX-1HCUA-0126-SM-B2LWC	Normal(n=712)	2.50487
GTEX-1HCVE-0726-SM-A96SH	Normal(n=712)	2.06281
GTEX-1HFI6-1326-SM-A9SL8	Normal(n=712)	0.942984
GTEX-1HFI7-0326-SM-9WPOX	Normal(n=712)	2.71721
GTEX-1HGF4-0726-SM-9WYU9	Normal(n=712)	2.61447
GTEX-1HKZK-0826-SM-A9G2C	Normal(n=712)	1.53804
GTEX-1HR98-0326-SM-CGQEL	Normal(n=712)	0.891575
GTEX-1HR9M-0626-SM-A96S6	Normal(n=712)	1.37629
GTEX-1HSEH-0826-SM-B2LXE	Normal(n=712)	6.10978
GTEX-1HSGN-0726-SM-A9G2F	Normal(n=712)	3.93452
GTEX-1HSKV-1026-SM-B2LWK	Normal(n=712)	0.322736
GTEX-1HSMO-0726-SM-A96TM	Normal(n=712)	0.407298
GTEX-1HSMQ-0526-SM-A96TY	Normal(n=712)	1.33857
GTEX-1HT8W-1526-SM-CE6S3	Normal(n=712)	0.20989
GTEX-1HUB1-1226-SM-B2LWX	Normal(n=712)	5.02414
GTEX-1I19N-0226-SM-CE6ST	Normal(n=712)	1.21971
GTEX-1I1GP-0326-SM-CNPQ4	Normal(n=712)	4.36597
GTEX-1I1GQ-0826-SM-CNNQR	Normal(n=712)	1.49006
GTEX-1I1GR-1126-SM-A9G2I	Normal(n=712)	1.05311
GTEX-1I1GS-0726-SM-C1YS7	Normal(n=712)	0.981707
GTEX-1I1GT-0826-SM-B2LWO	Normal(n=712)	1.4547
GTEX-1I1GU-0826-SM-ARZM5	Normal(n=712)	1.15575
GTEX-1I1GV-0726-SM-ARZLY	Normal(n=712)	0.555914
GTEX-1I6K6-0726-SM-B2LX4	Normal(n=712)	3.78973
GTEX-1I6K7-1126-SM-A96SW	Normal(n=712)	1.29101
GTEX-1ICG6-0426-SM-ARU7M	Normal(n=712)	2.66107
GTEX-1ICLY-0726-SM-A96TB	Normal(n=712)	2.5967
GTEX-1ICLZ-0526-SM-ARZM8	Normal(n=712)	2.53032
GTEX-1IDJC-1026-SM-A96T2	Normal(n=712)	5.13463
GTEX-1IDJH-0826-SM-CE6SY	Normal(n=712)	1.33743
GTEX-1IDJU-1626-SM-CJI4B	Normal(n=712)	1.0115
GTEX-1IE54-0926-SM-A9G2Y	Normal(n=712)	0.923415
GTEX-1IGQW-0626-SM-C1YR9	Normal(n=712)	0.879863
GTEX-1IKJJ-1026-SM-A96SQ	Normal(n=712)	1.49774
GTEX-1IKOE-0926-SM-ARU7X	Normal(n=712)	1.4351
GTEX-1IKOH-0626-SM-CJI35	Normal(n=712)	2.55065
GTEX-1IL2U-0826-SM-CL53Q	Normal(n=712)	1.25641
GTEX-1IL2V-0626-SM-ARU7S	Normal(n=712)	0.696795
GTEX-1IOXB-1026-SM-CJI4D	Normal(n=712)	0
GTEX-1IY9M-1026-SM-A96TG	Normal(n=712)	1.04963
GTEX-1J1OQ-0526-SM-A9G2P	Normal(n=712)	0.298541
GTEX-1J1R8-0126-SM-CJI36	Normal(n=712)	1.92903
GTEX-1J8EW-1126-SM-A96T8	Normal(n=712)	0.382723
GTEX-1J8JJ-0726-SM-AHZ3E	Normal(n=712)	0.402613
GTEX-1J8Q3-0226-SM-C1YR4	Normal(n=712)	1.50029
GTEX-1J8QM-0726-SM-CE6RF	Normal(n=712)	1.66448
GTEX-1JJ6O-0626-SM-AHZ3H	Normal(n=712)	4.13175
GTEX-1JJE9-0226-SM-CY8HU	Normal(n=712)	0.722991
GTEX-1JJEA-0626-SM-D3L96	Normal(n=712)	0.482952
GTEX-1JK1U-0326-SM-CXZJH	Normal(n=712)	2.79306
GTEX-1JKYN-1126-SM-CGQG5	Normal(n=712)	6.24641
GTEX-1JKYR-0826-SM-ARU8L	Normal(n=712)	1.24671
GTEX-1JMLX-0826-SM-CNNPP	Normal(n=712)	0.583712
GTEX-1JMPY-0126-SM-CJI39	Normal(n=712)	2.60975
GTEX-1JMPZ-0626-SM-CY8HY	Normal(n=712)	0.693677
GTEX-1JMQJ-2026-SM-CNPP9	Normal(n=712)	2.26333
GTEX-1JMQK-2126-SM-CY8I2	Normal(n=712)	0.568324
GTEX-1JMQL-0926-SM-CJI3F	Normal(n=712)	0.964362
GTEX-1JN6P-0626-SM-ARZN6	Normal(n=712)	1.10702
GTEX-1K2DA-1526-SM-CGQGQ	Normal(n=712)	3.9241
GTEX-1K2DU-0126-SM-E9TIU	Normal(n=712)	2.10601
GTEX-1K9T9-0826-SM-EAZ4X	Normal(n=712)	2.11537
GTEX-1KAFJ-0426-SM-DHXJH	Normal(n=712)	2.70465
GTEX-1KANC-0826-SM-D3LA8	Normal(n=712)	2.72923
GTEX-1KD4Q-1026-SM-CXZKJ	Normal(n=712)	4.08831
GTEX-1KD5A-0426-SM-D4P3X	Normal(n=712)	3.38184
GTEX-1KXAM-1726-SM-D3LAE	Normal(n=712)	3.48671
GTEX-1LB8K-0626-SM-D4P3Z	Normal(n=712)	0.916171
GTEX-1LBAC-0726-SM-D3L9U	Normal(n=712)	0.399226
GTEX-1LG7Y-0626-SM-DHXJM	Normal(n=712)	0.77543
GTEX-1LG7Z-0526-SM-D4P3Q	Normal(n=712)	2.26784
GTEX-1LGOU-0126-SM-EV79W	Normal(n=712)	3.33528
GTEX-1LGRB-1226-SM-CNNPS	Normal(n=712)	1.34993
GTEX-1LH75-0626-SM-DIPG3	Normal(n=712)	0.279293
GTEX-1LSVX-0726-SM-E9TJG	Normal(n=712)	4.24413
GTEX-1LVAM-0826-SM-EV79X	Normal(n=712)	2.34056
GTEX-1LVAN-0726-SM-CNNPF	Normal(n=712)	0.915789
GTEX-1M4P7-0626-SM-EVR51	Normal(n=712)	1.59311
GTEX-1MA7X-0926-SM-DIPEJ	Normal(n=712)	0.307312
GTEX-1MCC2-0526-SM-DHXJS	Normal(n=712)	1.62854
GTEX-1MGNQ-0726-SM-DPRYH	Normal(n=712)	2.3846
GTEX-1MJK2-0826-SM-DTXE8	Normal(n=712)	0.61899
GTEX-1MJK3-0326-SM-DTX96	Normal(n=712)	3.06419
GTEX-1MUQO-0726-SM-E9TJM	Normal(n=712)	3.3067
GTEX-1N5O9-1026-SM-DTX8Y	Normal(n=712)	0.755913
GTEX-1NUQO-0926-SM-DTXEX	Normal(n=712)	0.351063
GTEX-1NV5F-0726-SM-DTXEH	Normal(n=712)	0.833578
GTEX-1O97I-1026-SM-E76PI	Normal(n=712)	0.276675
GTEX-1O9I2-1226-SM-E6CQC	Normal(n=712)	2.19219
GTEX-1OFPY-1526-SM-DTX8R	Normal(n=712)	1.76129
GTEX-1OJC3-0626-SM-E8VMO	Normal(n=712)	0.727093
GTEX-1OJC4-0526-SM-E6CQV	Normal(n=712)	0.338681
GTEX-1P4AB-1126-SM-DTX94	Normal(n=712)	0.912573
GTEX-1PBJI-0726-SM-EXUSQ	Normal(n=712)	1.30217
GTEX-1PBJJ-1926-SM-DTX8T	Normal(n=712)	1.01578
GTEX-1PDJ9-0826-SM-E76PS	Normal(n=712)	1.7031
GTEX-1PFEY-0226-SM-EVR3M	Normal(n=712)	2.82293
GTEX-1PIGE-0726-SM-DPRZD	Normal(n=712)	0.327687
GTEX-1PIIG-2026-SM-EVR43	Normal(n=712)	2.03984
GTEX-1PPGY-1426-SM-EVR3R	Normal(n=712)	0.707966
GTEX-1PPH8-0926-SM-DTX9U	Normal(n=712)	0.478713
GTEX-1PWST-0726-SM-EWRMO	Normal(n=712)	0.579566
GTEX-1QAET-0226-SM-EVR3T	Normal(n=712)	0.635522
GTEX-1QCLY-0826-SM-DTX8A	Normal(n=712)	1.86196
GTEX-1QCLZ-0626-SM-E6CR2	Normal(n=712)	1.91686
GTEX-1QEPI-0726-SM-E76QG	Normal(n=712)	0.222186
GTEX-1QMI2-0826-SM-EXUT4	Normal(n=712)	0.0717764
GTEX-1QP28-0626-SM-E76P5	Normal(n=712)	0.867106
GTEX-1QP2A-0626-SM-DTX9C	Normal(n=712)	6.59962
GTEX-1QP66-0326-SM-DTX7V	Normal(n=712)	0.881508
GTEX-1QP67-0326-SM-EVR45	Normal(n=712)	0.461633
GTEX-1QP6S-2526-SM-DTX9Z	Normal(n=712)	2.23756
GTEX-1QP9N-0126-SM-DPRZS	Normal(n=712)	3.64847
GTEX-1QPFJ-0626-SM-DTX7Y	Normal(n=712)	1.87892
GTEX-1QW4Y-0226-SM-EAZ3U	Normal(n=712)	3.60051
GTEX-1R46S-0426-SM-EVR48	Normal(n=712)	1.543
GTEX-1R9JW-0226-SM-EVR4K	Normal(n=712)	0.535456
GTEX-1R9K4-0726-SM-EWRN2	Normal(n=712)	1.854
GTEX-1R9K5-0726-SM-EAZ4E	Normal(n=712)	1.82579
GTEX-1R9PM-0226-SM-DPRY7	Normal(n=712)	1.301
GTEX-1RAZA-0826-SM-EAZ4I	Normal(n=712)	1.91648
GTEX-1RAZQ-0926-SM-EAZ4Q	Normal(n=712)	2.95382
GTEX-1RAZR-1126-SM-E6CRC	Normal(n=712)	0.919455
GTEX-1RAZS-1026-SM-E9TID	Normal(n=712)	1.25278
GTEX-1RDX4-0926-SM-E9U6D	Normal(n=712)	4.72247
GTEX-1RMOY-0126-SM-EWRNN	Normal(n=712)	5.22419
GTEX-1RNSC-1126-SM-E9TIP	Normal(n=712)	0.770195
GTEX-1RQEC-1026-SM-EVR5B	Normal(n=712)	0.801655
GTEX-1RQED-0926-SM-EWRNZ	Normal(n=712)	0.418028
GTEX-1S5ZU-0726-SM-EWROH	Normal(n=712)	0.565597
GTEX-1S83E-0726-SM-EV7B6	Normal(n=712)	3.33885
GTEX-N7MS-2326-SM-2HMLD	Normal(n=712)	2.00216
GTEX-NFK9-0726-SM-2HMJW	Normal(n=712)	2.75766
GTEX-O5YV-1526-SM-EV799	Normal(n=712)	0.832363
GTEX-OHPK-2626-SM-2HMK9	Normal(n=712)	0.480679
GTEX-OHPL-2626-SM-2HMJA	Normal(n=712)	1.08134
GTEX-OHPM-2626-SM-33HC5	Normal(n=712)	1.33457
GTEX-OIZF-2626-SM-7P8QZ	Normal(n=712)	1.98696
GTEX-OIZG-0226-SM-2TC5L	Normal(n=712)	1.83592
GTEX-OIZI-0726-SM-2XCEI	Normal(n=712)	1.66129
GTEX-OOBJ-2626-SM-2I3F6	Normal(n=712)	1.06419
GTEX-OXRK-0626-SM-2HMJ5	Normal(n=712)	1.34028
GTEX-OXRL-2626-SM-2I3F1	Normal(n=712)	1.85917
GTEX-OXRN-1526-SM-E6CHM	Normal(n=712)	0.909965
GTEX-OXRO-1226-SM-48TDL	Normal(n=712)	0.741489
GTEX-OXRP-0326-SM-33HBJ	Normal(n=712)	4.01078
GTEX-P44G-0626-SM-2I5EO	Normal(n=712)	1.87853
GTEX-P4PQ-2626-SM-33HC9	Normal(n=712)	3.69488
GTEX-P4QS-2626-SM-2I3EV	Normal(n=712)	3.5741
GTEX-P4QT-2626-SM-2I3FM	Normal(n=712)	2.56682
GTEX-P78B-0526-SM-2I5F7	Normal(n=712)	0.944334
GTEX-PLZ4-1226-SM-2I5FE	Normal(n=712)	3.45365
GTEX-POYW-0826-SM-2XCEM	Normal(n=712)	2.84559
GTEX-PWCY-2326-SM-2I3EQ	Normal(n=712)	3.00953
GTEX-PWN1-2626-SM-2I3FH	Normal(n=712)	1.19598
GTEX-PX3G-2626-SM-2I3EG	Normal(n=712)	0.491186
GTEX-Q2AG-0826-SM-2HMKF	Normal(n=712)	0.505078
GTEX-Q2AH-0726-SM-2I3EA	Normal(n=712)	1.95196
GTEX-Q2AI-0326-SM-2I3EK	Normal(n=712)	0.93191
GTEX-Q734-0526-SM-2I3EH	Normal(n=712)	0.0985139
GTEX-QDT8-1226-SM-EVR35	Normal(n=712)	1.65076
GTEX-QDVJ-0226-SM-2I5FV	Normal(n=712)	7.66818
GTEX-QDVN-0626-SM-2I3FP	Normal(n=712)	0.704695
GTEX-QEG5-0826-SM-2I5GF	Normal(n=712)	2.35586
GTEX-QEL4-0726-SM-3GIJ5	Normal(n=712)	1.30042
GTEX-QLQ7-0726-SM-2I5G2	Normal(n=712)	4.41143
GTEX-QV31-0726-SM-3GAEG	Normal(n=712)	0.498149
GTEX-QV44-0826-SM-2S1RG	Normal(n=712)	1.48027
GTEX-QXCU-0326-SM-2TC63	Normal(n=712)	1.98514
GTEX-R3RS-0726-SM-3GIJR	Normal(n=712)	1.24245
GTEX-R53T-0526-SM-3GADL	Normal(n=712)	0.344828
GTEX-R55C-0626-SM-2TF4Q	Normal(n=712)	5.86022
GTEX-R55E-0826-SM-2TC5M	Normal(n=712)	0.230572
GTEX-R55G-0726-SM-2TC6J	Normal(n=712)	3.85
GTEX-REY6-0526-SM-2TF5M	Normal(n=712)	1.46415
GTEX-RM2N-0526-SM-2TF4N	Normal(n=712)	3.33099
GTEX-RN5K-2826-SM-EZ6L3	Normal(n=712)	0.425996
GTEX-RN64-0626-SM-2TC5V	Normal(n=712)	0.407081
GTEX-RNOR-0926-SM-2TF56	Normal(n=712)	0.491904
GTEX-RTLS-0626-SM-5SI7Z	Normal(n=712)	0.50924
GTEX-RU1J-0226-SM-2TF5Y	Normal(n=712)	4.12102
GTEX-RU72-0126-SM-2TF6Z	Normal(n=712)	0.702835
GTEX-RUSQ-1026-SM-2TF6V	Normal(n=712)	3.8268
GTEX-RVPV-1226-SM-2TF73	Normal(n=712)	2.71238
GTEX-RWS6-0626-SM-2XCAS	Normal(n=712)	2.96975
GTEX-RWSA-0826-SM-2XCBF	Normal(n=712)	4.94486
GTEX-S32W-0726-SM-2XCBL	Normal(n=712)	0.371057
GTEX-S341-0226-SM-D4P1Y	Normal(n=712)	4.03386
GTEX-S7SE-0726-SM-2XCD7	Normal(n=712)	0.5065
GTEX-S7SF-0226-SM-5SI7H	Normal(n=712)	1.35727
GTEX-SE5C-0726-SM-4BRWY	Normal(n=712)	1.18777
GTEX-SIU8-0626-SM-2XCDN	Normal(n=712)	0.596267
GTEX-SJXC-0726-SM-2XCFJ	Normal(n=712)	1.07793
GTEX-SN8G-1526-SM-4DM79	Normal(n=712)	0.64284
GTEX-SNOS-0226-SM-32PLR	Normal(n=712)	4.99277
GTEX-SUCS-0226-SM-32PLQ	Normal(n=712)	4.89142
GTEX-T2IS-0626-SM-32QP6	Normal(n=712)	0.573375
GTEX-T5JW-1226-SM-3GACY	Normal(n=712)	6.3482
GTEX-T6MN-0626-SM-32PM9	Normal(n=712)	0.569977
GTEX-T6MO-0226-SM-32QOL	Normal(n=712)	5.47573
GTEX-T8EM-0226-SM-3DB7C	Normal(n=712)	4.82477
GTEX-TKQ1-0126-SM-33HB3	Normal(n=712)	1.06212
GTEX-TMMY-0826-SM-33HB9	Normal(n=712)	3.32092
GTEX-TSE9-0626-SM-3DB8B	Normal(n=712)	1.02432
GTEX-U3ZH-0226-SM-3DB7B	Normal(n=712)	1.40871
GTEX-U3ZM-0126-SM-3DB8M	Normal(n=712)	4.48414
GTEX-U3ZN-0326-SM-3DB86	Normal(n=712)	0.978049
GTEX-U412-0726-SM-EVR2Y	Normal(n=712)	4.31759
GTEX-U4B1-0626-SM-3DB8L	Normal(n=712)	5.53419
GTEX-U8T8-2326-SM-3DB96	Normal(n=712)	2.77041
GTEX-UJMC-0326-SM-3GAE2	Normal(n=712)	0.731791
GTEX-V1D1-0926-SM-4JBHQ	Normal(n=712)	0.452279
GTEX-V955-0426-SM-3GAEL	Normal(n=712)	3.75275
GTEX-VJYA-0426-SM-3GIJK	Normal(n=712)	0.593784
GTEX-VUSG-0426-SM-3GIKD	Normal(n=712)	0.770702
GTEX-W5WG-1426-SM-4KKZP	Normal(n=712)	2.75446
GTEX-W5X1-0426-SM-3GILB	Normal(n=712)	0
GTEX-WEY5-0526-SM-3GIKZ	Normal(n=712)	2.98677
GTEX-WFG7-0326-SM-DKPO8	Normal(n=712)	3.41886
GTEX-WFG8-0426-SM-3GILD	Normal(n=712)	2.05068
GTEX-WFJO-0226-SM-3GIKW	Normal(n=712)	3.15656
GTEX-WH7G-0526-SM-3NMBI	Normal(n=712)	0.627046
GTEX-WHPG-0226-SM-3NMB9	Normal(n=712)	1.45207
GTEX-WHSB-1626-SM-3LK6J	Normal(n=712)	4.13586
GTEX-WHSE-0626-SM-4RGNF	Normal(n=712)	2.70973
GTEX-WK11-0926-SM-3NMAU	Normal(n=712)	0.673195
GTEX-WL46-0126-SM-3TW8I	Normal(n=712)	0.56589
GTEX-WOFL-0726-SM-3MJG4	Normal(n=712)	1.40708
GTEX-WRHU-0926-SM-4E3IG	Normal(n=712)	1.20852
GTEX-WVLH-0626-SM-3MJG7	Normal(n=712)	1.11503
GTEX-WWYW-0826-SM-3NB2X	Normal(n=712)	0.692338
GTEX-WXYG-0226-SM-3NB2Y	Normal(n=712)	5.20359
GTEX-WY7C-0226-SM-3NB37	Normal(n=712)	4.7939
GTEX-WYBS-1926-SM-3NM8N	Normal(n=712)	3.07929
GTEX-WYJK-1626-SM-3NM9J	Normal(n=712)	4.1102
GTEX-WYVS-0326-SM-3NM9V	Normal(n=712)	0.585347
GTEX-X15G-0526-SM-3NMB7	Normal(n=712)	0.862114
GTEX-X261-0726-SM-EZ6MH	Normal(n=712)	2.68908
GTEX-X4LF-0426-SM-3NMB5	Normal(n=712)	3.05728
GTEX-X4XX-0926-SM-46MV7	Normal(n=712)	0.968939
GTEX-X4XY-0826-SM-4E3JM	Normal(n=712)	0.656542
GTEX-X5EB-0726-SM-46MVR	Normal(n=712)	3.29543
GTEX-X8HC-0726-SM-46MWG	Normal(n=712)	0.777956
GTEX-XBED-0126-SM-47JY7	Normal(n=712)	1.07929
GTEX-XBEW-0126-SM-4AT66	Normal(n=712)	5.72819
GTEX-XGQ4-0426-SM-4AT4I	Normal(n=712)	1.94336
GTEX-XLM4-0726-SM-4AT64	Normal(n=712)	2.57652
GTEX-XMK1-0626-SM-4B65A	Normal(n=712)	1.67762
GTEX-XOT4-1526-SM-EAZ2W	Normal(n=712)	0.161178
GTEX-XUW1-1026-SM-4BONY	Normal(n=712)	1.54399
GTEX-XUZC-0126-SM-4BOO6	Normal(n=712)	3.06039
GTEX-XV7Q-0326-SM-4BRVM	Normal(n=712)	0.238542
GTEX-XXEK-1326-SM-4BRV1	Normal(n=712)	1.52657
GTEX-XYKS-0826-SM-4BRVF	Normal(n=712)	0.158208
GTEX-Y111-1926-SM-4SOIS	Normal(n=712)	0.477159
GTEX-Y114-0626-SM-4TT98	Normal(n=712)	2.85439
GTEX-Y3I4-0226-SM-4TT27	Normal(n=712)	2.23879
GTEX-Y3IK-0526-SM-4WWE3	Normal(n=712)	0.302992
GTEX-Y5LM-0626-SM-4V6G4	Normal(n=712)	5.05007
GTEX-Y5V5-0326-SM-5RQJG	Normal(n=712)	1.00144
GTEX-Y5V6-0526-SM-4VBRV	Normal(n=712)	4.20398
GTEX-Y8E4-0126-SM-4VBQ2	Normal(n=712)	4.40735
GTEX-Y9LG-0426-SM-4VBRT	Normal(n=712)	3.52982
GTEX-YB5E-0626-SM-4VDSE	Normal(n=712)	2.84599
GTEX-YB5K-0526-SM-5LUAS	Normal(n=712)	1.5145
GTEX-YEC3-0826-SM-4WWFP	Normal(n=712)	4.63169
GTEX-YEC4-0626-SM-5CVLU	Normal(n=712)	5.15299
GTEX-YF7O-0726-SM-4W213	Normal(n=712)	1.00576
GTEX-YFC4-2626-SM-5P9FQ	Normal(n=712)	1.64062
GTEX-YFCO-0326-SM-4W1ZP	Normal(n=712)	3.18126
GTEX-YJ89-0726-SM-5P9F7	Normal(n=712)	0.894915
GTEX-Z93S-0526-SM-EVYB4	Normal(n=712)	0.89538
GTEX-Z9EW-0226-SM-5CVM7	Normal(n=712)	4.82833
GTEX-ZA64-0426-SM-5HL96	Normal(n=712)	0.860367
GTEX-ZAB5-0726-SM-5P9JG	Normal(n=712)	0.653885
GTEX-ZAJG-0726-SM-5HL9A	Normal(n=712)	2.72705
GTEX-ZAK1-0726-SM-5HL8Q	Normal(n=712)	0.438506
GTEX-ZC5H-0626-SM-5LU9K	Normal(n=712)	0.723864
GTEX-ZDTS-0926-SM-5YY9D	Normal(n=712)	1.77737
GTEX-ZDXO-1726-SM-5HL6L	Normal(n=712)	2.97012
GTEX-ZDYS-0626-SM-5J2N5	Normal(n=712)	2.16736
GTEX-ZE7O-1126-SM-57WC8	Normal(n=712)	0.280838
GTEX-ZF28-0826-SM-4WKGJ	Normal(n=712)	1.33113
GTEX-ZF29-0726-SM-DO92H	Normal(n=712)	1.05589
GTEX-ZF3C-0826-SM-DO11E	Normal(n=712)	0.326652
GTEX-ZGAY-1026-SM-4WWBR	Normal(n=712)	2.90785
GTEX-ZLFU-0626-SM-4WWBO	Normal(n=712)	1.168
GTEX-ZLV1-0126-SM-4WWBZ	Normal(n=712)	4.8268
GTEX-ZLWG-0526-SM-4WWFB	Normal(n=712)	1.47145
GTEX-ZPCL-0126-SM-4WWC8	Normal(n=712)	2.88869
GTEX-ZPIC-0226-SM-DO91T	Normal(n=712)	0.292546
GTEX-ZPU1-0426-SM-4WWCA	Normal(n=712)	1.42116
GTEX-ZQG8-0926-SM-57WFF	Normal(n=712)	2.15218
GTEX-ZQUD-0126-SM-7EPIS	Normal(n=712)	1.91418
GTEX-ZT9W-0226-SM-7SB6H	Normal(n=712)	7.84046
GTEX-ZT9X-0226-SM-51MT2	Normal(n=712)	0.444455
GTEX-ZTPG-0826-SM-5DUVC	Normal(n=712)	0.721066
GTEX-ZTSS-0226-SM-59877	Normal(n=712)	2.32884
GTEX-ZTX8-0626-SM-59HKC	Normal(n=712)	2.82151
GTEX-ZUA1-0926-SM-4YCDX	Normal(n=712)	2.40626
GTEX-ZV6S-0226-SM-59HJT	Normal(n=712)	6.0063
GTEX-ZV7C-0126-SM-57WDE	Normal(n=712)	0.616264
GTEX-ZVP2-0426-SM-57WC2	Normal(n=712)	1.58063
GTEX-ZVT3-0726-SM-5GICN	Normal(n=712)	0.0443102
GTEX-ZVZP-1026-SM-5GICI	Normal(n=712)	1.95791
GTEX-ZVZQ-0626-SM-59HJU	Normal(n=712)	0.1995
GTEX-ZXG5-0926-SM-5NQ8H	Normal(n=712)	0.360308
GTEX-ZY6K-0226-SM-5SIAY	Normal(n=712)	2.49237
GTEX-ZYFC-0926-SM-5GZWW	Normal(n=712)	0.595122
GTEX-ZYFD-0826-SM-5NQ9A	Normal(n=712)	0.587653
GTEX-ZYFG-0626-SM-5GZYA	Normal(n=712)	3.68818
GTEX-ZYT6-0426-SM-5GID3	Normal(n=712)	0.446468
GTEX-ZYVF-1126-SM-5E458	Normal(n=712)	1.39122
GTEX-ZYW4-1126-SM-5SI99	Normal(n=712)	0.372172
GTEX-ZYY3-1926-SM-5GZXS	Normal(n=712)	1.4782
GTEX-ZZ64-0126-SM-5GZXA	Normal(n=712)	5.58286
GTEX-ZZPU-1326-SM-5GZWS	Normal(n=712)	0.849199

## Sheet: Sankey diagram
Table S3. ZCCHC12 expression and its correlation with THCA survival and staging
	Age	Gender	pTNM_stage	ZCCHC12	Status
TCGA-ET-A2N0-01	<=60	F	III	High exp	Alive
TCGA-FE-A3PA-01	<=60	M	II	Low exp	Alive
TCGA-EM-A1YC-01	>60	F	III	Low exp	Alive
TCGA-IM-A420-01	<=60	F	I	Low exp	Alive
TCGA-FY-A76V-01	<=60	M	II	High exp	Alive
TCGA-EM-A2CR-01	<=60	F	II	Low exp	Alive
TCGA-EM-A3FO-01	<=60	M	I	High exp	Alive
TCGA-EL-A3H7-01	<=60	F	I	Low exp	Alive
TCGA-KS-A4I5-01	<=60	F	IV	High exp	Alive
TCGA-MK-A84Z-01	>60	M	III	High exp	Alive
TCGA-EM-A4FM-01	<=60	F	IV	Low exp	Alive
TCGA-BJ-A190-01	<=60	M	II	Low exp	Alive
TCGA-BJ-A0ZC-01	<=60	M	I	Low exp	Alive
TCGA-EM-A4FO-01	>60	M	I	Low exp	Alive
TCGA-DJ-A2PO-01	<=60	M	I	High exp	Alive
TCGA-EL-A3ZT-01	<=60	M	I	High exp	Alive
TCGA-DJ-A3V9-01	<=60	F	IV	High exp	Alive
TCGA-ET-A3DV-01	>60	F	II	Low exp	Alive
TCGA-FY-A3NN-01	<=60	F	III	High exp	Alive
TCGA-DJ-A13O-01	<=60	M	I	Low exp	Alive
TCGA-EM-A1CW-01	<=60	F	I	Low exp	Alive
TCGA-E8-A436-01	<=60	F	IV	Low exp	Alive
TCGA-DJ-A1QO-01	>60	M	III	Low exp	Alive
TCGA-E3-A3E2-01	<=60	F	I	High exp	Alive
TCGA-E8-A416-01	<=60	F	I	Low exp	Alive
TCGA-EL-A3GV-01	>60	F	III	High exp	Alive
TCGA-ET-A2N3-01	<=60	F	I	Low exp	Alive
TCGA-BJ-A2NA-01	>60	M	III	Low exp	Alive
TCGA-DJ-A4V0-01	<=60	F	I	Low exp	Alive
TCGA-EL-A3CM-01	>60	F	III	Low exp	Dead
TCGA-EM-A3O3-01	>60	F	III	High exp	Alive
TCGA-FY-A3TY-01	>60	F	III	Low exp	Alive
TCGA-EL-A3T6-01	<=60	F	I	Low exp	Alive
TCGA-ET-A3BO-01	<=60	F	I	High exp	Alive
TCGA-EM-A2OX-01	<=60	M	IV	High exp	Alive
TCGA-EL-A3D6-01	<=60	F	III	Low exp	Alive
TCGA-J8-A3YF-01	>60	M	III	Low exp	Alive
TCGA-CE-A481-01	<=60	F	I	High exp	Alive
TCGA-E8-A419-01	<=60	F	I	Low exp	Alive
TCGA-ET-A25G-01	<=60	F	III	Low exp	Alive
TCGA-E8-A438-01	<=60	F	I	High exp	Alive
TCGA-E3-A3E0-01	<=60	F	I	High exp	Alive
TCGA-DE-A0Y3-01	<=60	F	IV	High exp	Alive
TCGA-EM-A3FR-01	<=60	F	III	Low exp	Alive
TCGA-ET-A3DS-01	<=60	F	I	Low exp	Alive
TCGA-DJ-A4UL-01	>60	F	I	Low exp	Alive
TCGA-EM-A2CK-01	<=60	M	I	High exp	Alive
TCGA-J8-A3O1-01	<=60	F	I	Low exp	Alive
TCGA-FE-A237-01	<=60	F	I	High exp	Alive
TCGA-BJ-A3PT-01	<=60	F	III	Low exp	Alive
TCGA-EM-A3O8-01	<=60	F	I	High exp	Alive
TCGA-H2-A2K9-01	<=60	M	I	High exp	Alive
TCGA-DJ-A2Q7-01	<=60	F	III	High exp	Alive
TCGA-EL-A3CT-01	>60	F	IV	High exp	Dead
TCGA-DJ-A1QM-01	<=60	M	I	Low exp	Alive
TCGA-H2-A3RH-01	<=60	F	I	High exp	Alive
TCGA-IM-A41Z-01	<=60	F	I	Low exp	Alive
TCGA-EM-A22O-01	>60	M	IV	Low exp	Alive
TCGA-DJ-A4UR-01	<=60	F	II	Low exp	Alive
TCGA-IM-A3EB-01	<=60	F	I	High exp	Alive
TCGA-EL-A3ZN-01	<=60	F	I	High exp	Alive
TCGA-FK-A3SH-01	<=60	F	III	High exp	Alive
TCGA-EL-A3ZS-01	<=60	F	I	High exp	Alive
TCGA-EL-A3GR-01	<=60	F	I	High exp	Alive
TCGA-DE-A3KN-01	<=60	F	IV	High exp	Alive
TCGA-EM-A3AI-01	>60	F	II	Low exp	Alive
TCGA-ET-A39R-01	<=60	F	I	High exp	Alive
TCGA-DJ-A13X-01	<=60	F	III	High exp	Alive
TCGA-ET-A25O-01	<=60	F	I	Low exp	Alive
TCGA-EM-A1YD-01	<=60	F	II	Low exp	Alive
TCGA-FE-A22Z-01	>60	F	IV	Low exp	Alive
TCGA-BJ-A2N8-01	<=60	F	I	High exp	Alive
TCGA-DJ-A13W-01	<=60	F	I	Low exp	Alive
TCGA-EL-A3N2-01	<=60	F	I	High exp	Alive
TCGA-EM-A4FF-01	<=60	F	I	High exp	Alive
TCGA-EL-A3CU-01	>60	F	III	Low exp	Alive
TCGA-J8-A3YD-01	<=60	F	III	Low exp	Alive
TCGA-FY-A3YR-01	>60	F	III	High exp	Alive
TCGA-DJ-A2PV-01	<=60	F	II	High exp	Alive
TCGA-KS-A4I3-01	<=60	M	I	Low exp	Alive
TCGA-EM-A1CV-01	<=60	F	I	High exp	Alive
TCGA-BJ-A3PR-01	>60	F	I	Low exp	Alive
TCGA-EM-A3O6-01	<=60	F	II	Low exp	Alive
TCGA-BJ-A45J-01	<=60	F	I	High exp	Alive
TCGA-BJ-A28V-01	>60	F	III	Low exp	Alive
TCGA-EM-A3FP-01	>60	F	II	Low exp	Alive
TCGA-EM-A3SY-01	<=60	M	I	Low exp	Alive
TCGA-FK-A3S3-01	<=60	F	I	High exp	Alive
TCGA-FY-A3NP-01	>60	M	I	High exp	Alive
TCGA-E8-A242-01	<=60	F	III	High exp	Alive
TCGA-FY-A3BL-01	<=60	M	I	Low exp	Alive
TCGA-EL-A3CR-01	>60	F	III	Low exp	Dead
TCGA-DJ-A13P-01	<=60	F	II	Low exp	Alive
TCGA-FE-A239-01	>60	M	III	Low exp	Dead
TCGA-DE-A69K-01	<=60	F	III	High exp	Alive
TCGA-E8-A418-01	>60	F	IV	Low exp	Alive
TCGA-EL-A3D0-01	>60	M	III	Low exp	Alive
TCGA-EL-A3D4-01	>60	M	IV	High exp	Alive
TCGA-MK-A4N6-01	<=60	M	I	High exp	Alive
TCGA-E8-A437-01	<=60	F	I	Low exp	Alive
TCGA-EM-A3FL-01	>60	F	I	Low exp	Alive
TCGA-J8-A3YH-01	<=60	M	I	High exp	Alive
TCGA-E8-A433-01	<=60	F	I	Low exp	Alive
TCGA-EL-A4K9-01	>60	M	II	High exp	Alive
TCGA-E8-A2EA-01	<=60	F	I	Low exp	Alive
TCGA-ET-A3BU-01	<=60	M	I	High exp	Alive
TCGA-EL-A4K0-01	<=60	F	I	High exp	Alive
TCGA-EM-A2CM-01	>60	F	III	Low exp	Alive
TCGA-EL-A4K1-01	>60	F	III	Low exp	Alive
TCGA-EL-A3CL-01	>60	F	II	High exp	Dead
TCGA-DJ-A2PR-01	<=60	M	I	High exp	Alive
TCGA-DJ-A2QA-01	<=60	F	III	Low exp	Alive
TCGA-DJ-A3VJ-01	<=60	M	I	High exp	Alive
TCGA-ET-A3DO-01	<=60	F	I	Low exp	Alive
TCGA-EM-A2CN-01	>60	M	IV	High exp	Alive
TCGA-DJ-A3UV-01	<=60	F	I	High exp	Alive
TCGA-J8-A3O2-06	<=60	M	I	High exp	Alive
TCGA-IM-A4EB-01	<=60	M	I	Low exp	Alive
TCGA-EM-A3OA-01	<=60	F	II	Low exp	Alive
TCGA-EL-A3MW-01	<=60	F	II	Low exp	Alive
TCGA-FE-A234-01	<=60	F	I	Low exp	Alive
TCGA-EM-A2CQ-01	<=60	F	I	Low exp	Alive
TCGA-FY-A40K-01	<=60	F	I	Low exp	Alive
TCGA-ET-A40P-01	<=60	F	I	High exp	Alive
TCGA-DJ-A1QF-01	>60	F	II	High exp	Alive
TCGA-EL-A4KH-01	<=60	F	I	High exp	Alive
TCGA-ET-A3BV-01	<=60	F	III	Low exp	Alive
TCGA-CE-A27D-01	<=60	F	I	High exp	Alive
TCGA-EL-A4KI-01	>60	M	III	High exp	Alive
TCGA-KS-A4I7-01	>60	F	I	High exp	Alive
TCGA-EM-A3SZ-01	<=60	F	I	High exp	Alive
TCGA-DJ-A3VB-01	<=60	M	III	High exp	Alive
TCGA-DJ-A2PP-01	<=60	M	II	Low exp	Alive
TCGA-DJ-A4V4-01	<=60	F	I	High exp	Alive
TCGA-EL-A4KG-01	<=60	F	I	Low exp	Alive
TCGA-FE-A3PD-01	<=60	F	I	High exp	Alive
TCGA-ET-A40R-01	<=60	F	I	High exp	Alive
TCGA-EM-A4FK-01	<=60	F	I	Low exp	Alive
TCGA-DJ-A2PU-01	<=60	F	II	High exp	Alive
TCGA-J8-A3YG-01	<=60	F	III	Low exp	Alive
TCGA-BJ-A2N9-01	<=60	F	I	Low exp	Alive
TCGA-EM-A22Q-01	<=60	M	I	Low exp	Alive
TCGA-FE-A23A-01	<=60	F	I	Low exp	Alive
TCGA-EL-A3T2-01	<=60	F	III	High exp	Alive
TCGA-ET-A39K-01	<=60	F	III	High exp	Alive
TCGA-H2-A26U-01	<=60	F	III	Low exp	Alive
TCGA-EM-A3AO-01	>60	M	IV	High exp	Alive
TCGA-BJ-A45H-01	<=60	M	III	High exp	Alive
TCGA-J8-A3O0-01	<=60	M	I	High exp	Alive
TCGA-EM-A2P2-01	<=60	M	III	High exp	Alive
TCGA-IM-A3ED-01	<=60	F	I	High exp	Alive
TCGA-BJ-A18Y-01	<=60	M	I	High exp	Alive
TCGA-ET-A40S-01	>60	M	II	High exp	Alive
TCGA-EL-A4K7-01	>60	M	III	Low exp	Alive
TCGA-EL-A3GZ-01	<=60	F	I	High exp	Alive
TCGA-BJ-A0ZJ-01	<=60	M	I	High exp	Alive
TCGA-BJ-A0ZF-01	<=60	F	II	Low exp	Alive
TCGA-FE-A232-01	<=60	F	I	Low exp	Alive
TCGA-DJ-A3V4-01	<=60	F	III	High exp	Alive
TCGA-DJ-A3UP-01	<=60	F	I	High exp	Alive
TCGA-DJ-A1QN-01	<=60	F	I	High exp	Alive
TCGA-EM-A3AJ-01	<=60	M	I	Low exp	Alive
TCGA-EM-A1YA-01	>60	F	II	Low exp	Alive
TCGA-FY-A3R8-01	>60	F	III	High exp	Alive
TCGA-BJ-A45K-01	<=60	M	I	Low exp	Alive
TCGA-DJ-A3V2-01	<=60	F	I	High exp	Alive
TCGA-J8-A3O2-01	<=60	M	I	High exp	Alive
TCGA-ET-A3BN-01	<=60	F	I	High exp	Alive
TCGA-DJ-A3UU-01	<=60	F	III	High exp	Alive
TCGA-DJ-A3UQ-01	<=60	F	III	High exp	Alive
TCGA-DJ-A3V3-01	<=60	F	II	High exp	Alive
TCGA-FY-A3R9-01	>60	F	I	Low exp	Alive
TCGA-KS-A41J-01	<=60	F	I	High exp	Alive
TCGA-EL-A4K2-01	<=60	F	I	Low exp	Alive
TCGA-FY-A3WA-01	<=60	F	I	Low exp	Alive
TCGA-DJ-A13S-01	<=60	F	I	Low exp	Alive
TCGA-EM-A2P1-06	<=60	M	I	High exp	Alive
TCGA-DJ-A3US-01	<=60	F	I	High exp	Alive
TCGA-ET-A2N4-01	<=60	F	III	High exp	Alive
TCGA-ET-A39N-01	<=60	F	I	Low exp	Alive
TCGA-EM-A4FV-01	>60	F	I	Low exp	Alive
TCGA-BJ-A0ZA-01	>60	F	II	High exp	Alive
TCGA-BJ-A0Z0-01	<=60	M	II	High exp	Alive
TCGA-DJ-A4V5-01	<=60	M	IV	High exp	Alive
TCGA-EL-A3H5-01	<=60	F	IV	Low exp	Alive
TCGA-EL-A3T9-01	>60	F	IV	Low exp	Dead
TCGA-J8-A42S-01	<=60	M	III	Low exp	Alive
TCGA-EM-A3FM-01	<=60	M	IV	Low exp	Alive
TCGA-ET-A40T-01	<=60	F	I	High exp	Alive
TCGA-J8-A4HW-01	<=60	F	III	Low exp	Alive
TCGA-ET-A25J-01	<=60	F	I	High exp	Alive
TCGA-BJ-A28R-01	<=60	F	I	High exp	Alive
TCGA-BJ-A3F0-01	>60	F	I	Low exp	Alive
TCGA-EL-A3H2-01	<=60	M	II	Low exp	Dead
TCGA-E3-A3E1-01	<=60	F	I	High exp	Alive
TCGA-FK-A4UB-01	<=60	M	III	Low exp	Alive
TCGA-QD-A8IV-01	<=60	F	IV	High exp	Alive
TCGA-DJ-A2QC-01	>60	F	II	High exp	Alive
TCGA-EL-A3CN-01	<=60	F	II	Low exp	Alive
TCGA-DJ-A3UM-01	<=60	F	I	High exp	Alive
TCGA-BJ-A291-01	<=60	F	I	Low exp	Alive
TCGA-EL-A3GY-01	<=60	F	II	High exp	Alive
TCGA-DJ-A2PW-01	>60	M	III	High exp	Alive
TCGA-EM-A2CS-01	<=60	F	IV	High exp	Alive
TCGA-EL-A3ZM-01	<=60	M	IV	Low exp	Alive
TCGA-E8-A417-01	<=60	F	I	Low exp	Alive
TCGA-EL-A3MZ-01	>60	M	III	High exp	Dead
TCGA-FE-A235-01	<=60	F	I	High exp	Alive
TCGA-CE-A483-01	<=60	F	I	High exp	Alive
TCGA-BJ-A45C-01	>60	M	III	Low exp	Dead
TCGA-KS-A41F-01	<=60	F	I	Low exp	Alive
TCGA-DJ-A3V0-01	<=60	M	IV	Low exp	Alive
TCGA-ET-A39S-01	<=60	F	I	High exp	Alive
TCGA-EL-A3TB-01	<=60	F	III	High exp	Alive
TCGA-E8-A432-01	<=60	F	II	High exp	Alive
TCGA-ET-A3BT-01	<=60	F	IV	Low exp	Alive
TCGA-DJ-A3VL-01	<=60	M	I	High exp	Alive
TCGA-ET-A25K-01	<=60	F	I	High exp	Alive
TCGA-ET-A3BS-01	<=60	M	I	High exp	Alive
TCGA-BJ-A45G-01	<=60	F	III	Low exp	Alive
TCGA-H2-A421-01	<=60	F	I	Low exp	Alive
TCGA-DE-A0XZ-01	>60	F	III	High exp	Alive
TCGA-BJ-A45I-01	<=60	F	III	Low exp	Alive
TCGA-KS-A41I-01	<=60	F	I	Low exp	Alive
TCGA-DJ-A2PZ-01	>60	M	III	Low exp	Alive
TCGA-DJ-A3V7-01	<=60	F	III	Low exp	Alive
TCGA-EL-A3GO-01	<=60	F	I	Low exp	Alive
TCGA-EM-A2CL-01	<=60	M	I	Low exp	Alive
TCGA-MK-A4N7-01	<=60	F	I	High exp	Alive
TCGA-DJ-A2Q4-01	<=60	M	III	High exp	Alive
TCGA-EL-A3T7-01	<=60	F	II	High exp	Alive
TCGA-DJ-A3UR-01	<=60	F	III	Low exp	Alive
TCGA-CE-A13K-01	<=60	F	I	High exp	Alive
TCGA-J8-A4HY-01	>60	F	IV	Low exp	Alive
TCGA-DJ-A3V5-01	>60	F	III	Low exp	Alive
TCGA-DJ-A1QQ-01	<=60	M	I	High exp	Alive
TCGA-EL-A3H3-01	<=60	F	I	High exp	Alive
TCGA-DJ-A4UP-01	<=60	F	I	High exp	Alive
TCGA-DE-A7U5-01	<=60	F	I	Low exp	Alive
TCGA-EL-A4K6-01	>60	M	IV	High exp	Alive
TCGA-EL-A3MY-01	>60	M	IV	Low exp	Dead
TCGA-DJ-A3VA-01	<=60	F	I	High exp	Alive
TCGA-DJ-A4UT-01	<=60	F	I	High exp	Alive
TCGA-ET-A25I-01	<=60	F	I	Low exp	Alive
TCGA-BJ-A45E-01	<=60	F	I	Low exp	Alive
TCGA-E8-A3X7-01	<=60	F	IV	Low exp	Alive
TCGA-DJ-A1QH-01	<=60	F	III	Low exp	Alive
TCGA-BJ-A0ZB-01	>60	M	IV	High exp	Alive
TCGA-BJ-A3PU-01	<=60	M	III	Low exp	Alive
TCGA-EM-A2CT-01	<=60	F	I	Low exp	Alive
TCGA-BJ-A192-01	<=60	F	III	Low exp	Alive
TCGA-E8-A414-01	<=60	F	III	Low exp	Alive
TCGA-FY-A3ON-01	<=60	M	I	High exp	Alive
TCGA-BJ-A28W-01	<=60	F	I	Low exp	Alive
TCGA-EL-A3CX-01	<=60	F	I	Low exp	Alive
TCGA-DJ-A4V2-01	<=60	F	I	Low exp	Alive
TCGA-ET-A39M-01	<=60	M	I	Low exp	Alive
TCGA-DJ-A3VM-01	>60	F	II	Low exp	Alive
TCGA-BJ-A28S-01	>60	M	II	High exp	Alive
TCGA-FK-A3SB-01	<=60	F	I	High exp	Alive
TCGA-H2-A422-01	<=60	F	I	Low exp	Alive
TCGA-DJ-A3UT-01	<=60	F	I	High exp	Alive
TCGA-BJ-A0Z5-01	<=60	M	III	High exp	Alive
TCGA-EM-A4FN-01	<=60	F	IV	High exp	Alive
TCGA-BJ-A4O9-01	<=60	F	II	High exp	Alive
TCGA-FK-A3SD-01	>60	F	I	Low exp	Alive
TCGA-FY-A40L-01	<=60	F	IV	High exp	Alive
TCGA-ET-A3DW-01	>60	M	III	Low exp	Alive
TCGA-FY-A4B0-01	>60	M	I	Low exp	Alive
TCGA-ET-A2MZ-01	<=60	M	I	High exp	Alive
TCGA-E8-A2JQ-01	<=60	F	I	Low exp	Alive
TCGA-DJ-A3VF-01	<=60	F	IV	Low exp	Alive
TCGA-ET-A39L-01	<=60	F	I	Low exp	Alive
TCGA-EM-A3AP-01	<=60	F	I	Low exp	Alive
TCGA-MK-A4N9-01	<=60	F	I	High exp	Alive
TCGA-EM-A22I-01	<=60	F	III	High exp	Alive
TCGA-DJ-A2PN-01	>60	F	I	High exp	Alive
TCGA-E3-A3DY-01	<=60	M	I	High exp	Alive
TCGA-DJ-A3VD-01	<=60	F	I	Low exp	Alive
TCGA-DJ-A2Q3-01	>60	F	III	High exp	Alive
TCGA-ET-A3DP-01	<=60	F	I	High exp	Alive
TCGA-L6-A4EU-01	<=60	F	III	Low exp	Alive
TCGA-EL-A4JW-01	<=60	F	I	Low exp	Alive
TCGA-E8-A415-01	<=60	F	I	Low exp	Alive
TCGA-BJ-A3EZ-01	<=60	M	IV	Low exp	Alive
TCGA-ET-A3DU-01	<=60	F	I	Low exp	Alive
TCGA-DJ-A3UZ-01	>60	F	III	High exp	Alive
TCGA-FK-A3SE-01	<=60	F	I	High exp	Alive
TCGA-DJ-A2PY-01	<=60	F	III	High exp	Alive
TCGA-DE-A69J-01	<=60	F	I	High exp	Alive
TCGA-EL-A3GP-01	>60	M	III	Low exp	Alive
TCGA-DJ-A3UO-01	>60	M	IV	High exp	Alive
TCGA-EL-A4K4-01	<=60	F	I	Low exp	Alive
TCGA-ET-A39I-01	>60	F	I	High exp	Dead
TCGA-DE-A4MB-01	>60	F	IV	Low exp	Alive
TCGA-EL-A3CZ-01	<=60	F	I	High exp	Alive
TCGA-DJ-A1QG-01	>60	M	I	Low exp	Alive
TCGA-GE-A2C6-01	<=60	F	I	High exp	Alive
TCGA-DJ-A3UN-01	<=60	F	I	High exp	Alive
TCGA-BJ-A0YZ-01	>60	M	II	Low exp	Alive
TCGA-EL-A3ZP-01	<=60	M	I	Low exp	Alive
TCGA-J8-A3YE-01	<=60	F	I	High exp	Alive
TCGA-DJ-A13T-01	<=60	F	I	High exp	Alive
TCGA-EM-A3FQ-01	<=60	F	I	Low exp	Alive
TCGA-DE-A4MD-06	>60	M	IV	Low exp	Alive
TCGA-EL-A3CP-01	<=60	F		Low exp	Alive
TCGA-DJ-A3UY-01	<=60	F	I	Low exp	Alive
TCGA-EM-A3O7-01	<=60	F	III	Low exp	Alive
TCGA-FE-A230-01	<=60	F	I	Low exp	Alive
TCGA-EL-A3H1-01	>60	F	I	Low exp	Dead
TCGA-IM-A3U2-01	>60	F	IV	Low exp	Alive
TCGA-DJ-A2PS-01	<=60	F	I	High exp	Alive
TCGA-EM-A2CU-01	<=60	F	III	High exp	Alive
TCGA-EM-A1CU-01	<=60	M	I	High exp	Alive
TCGA-ET-A4KN-01	<=60	F	III	Low exp	Alive
TCGA-ET-A40Q-01	<=60	M	I	Low exp	Alive
TCGA-EL-A3ZH-01	<=60	F	I	High exp	Alive
TCGA-ET-A3BQ-01	<=60	F	I	High exp	Alive
TCGA-FY-A3R7-01	<=60	F	III	High exp	Alive
TCGA-ET-A3BX-01	<=60	M	I	Low exp	Alive
TCGA-DJ-A2Q2-01	<=60	F	III	Low exp	Alive
TCGA-DJ-A1QE-01	>60	F	III	Low exp	Alive
TCGA-EL-A3ZL-01	<=60	F	I	High exp	Alive
TCGA-EM-A2CS-06	<=60	F	IV	High exp	Alive
TCGA-DJ-A13U-01	<=60	M	III	Low exp	Alive
TCGA-DJ-A2Q5-01	<=60	M	IV	High exp	Alive
TCGA-EL-A4JZ-01	<=60	F	III	High exp	Alive
TCGA-EM-A22N-01	>60	F	I	Low exp	Alive
TCGA-BJ-A2N7-01	<=60	F	I	High exp	Alive
TCGA-J8-A4HW-06	<=60	F	III	High exp	Alive
TCGA-DJ-A1QD-01	<=60	F	I	High exp	Alive
TCGA-BJ-A0ZE-01	>60	F	III	Low exp	Alive
TCGA-EM-A4FH-01	>60	M	III	Low exp	Alive
TCGA-BJ-A45D-01	<=60	M	I	Low exp	Alive
TCGA-ET-A2MX-01	<=60	M	I	Low exp	Alive
TCGA-EL-A3CW-01	>60	F	III	Low exp	Dead
TCGA-EM-A3AN-01	<=60	F	I	High exp	Alive
TCGA-CE-A482-01	<=60	F	I	High exp	Alive
TCGA-BJ-A0ZH-01	<=60	F	IV	Low exp	Alive
TCGA-EM-A3ST-01	>60	F	III	High exp	Alive
TCGA-BJ-A290-01	>60	M	III	High exp	Alive
TCGA-FY-A3I5-01	>60	F	III	Low exp	Alive
TCGA-FY-A4B4-01	>60	F	III	Low exp	Alive
TCGA-FY-A4B3-01	<=60	M	III	High exp	Alive
TCGA-FY-A3RA-01	<=60	F	I	High exp	Alive
TCGA-DJ-A2QB-01	<=60	F	IV	Low exp	Alive
TCGA-ET-A39P-01	>60	F	III	Low exp	Alive
TCGA-DE-A0Y2-01	<=60	F	I	High exp	Alive
TCGA-BJ-A0ZG-01	>60	M	I	Low exp	Alive
TCGA-DJ-A2PQ-01	<=60	M	I	Low exp	Alive
TCGA-EL-A3ZR-01	<=60	F	II	High exp	Alive
TCGA-DJ-A3VG-01	<=60	M	I	High exp	Alive
TCGA-E8-A434-01	<=60	F	I	Low exp	Alive
TCGA-DJ-A2Q6-01	<=60	F	I	High exp	Alive
TCGA-DJ-A2Q1-01	<=60	F	I	Low exp	Alive
TCGA-DJ-A13R-01	<=60	M	III	Low exp	Alive
TCGA-EM-A2P3-01	<=60	F	I	High exp	Alive
TCGA-BJ-A28T-01	<=60	F	I	Low exp	Alive
TCGA-ET-A39O-01	<=60	M	I	Low exp	Alive
TCGA-EL-A3T1-01	<=60	F	I	Low exp	Alive
TCGA-EL-A3CO-01	>60	M	III	Low exp	Dead
TCGA-E8-A44M-01	<=60	F	I	High exp	Alive
TCGA-EM-A1CS-01	<=60	F	I	Low exp	Alive
TCGA-CE-A485-01	<=60	M	I	High exp	Alive
TCGA-BJ-A0Z3-01	<=60	F	I	Low exp	Alive
TCGA-EL-A3ZK-01	<=60	F	I	Low exp	Alive
TCGA-EM-A3FJ-01	<=60	F	I	High exp	Alive
TCGA-DJ-A4UQ-01	<=60	M	IV	High exp	Alive
TCGA-E8-A44K-01	<=60	F	I	Low exp	Alive
TCGA-KS-A4IC-01	<=60	F	III	Low exp	Alive
TCGA-EM-A1YB-01	>60	F	II	Low exp	Alive
TCGA-EL-A3H8-01	<=60	F	I	Low exp	Alive
TCGA-BJ-A191-01	<=60	F	I	Low exp	Alive
TCGA-FY-A2QD-01	>60	F		Low exp	Alive
TCGA-DJ-A2PT-01	>60	F	III	Low exp	Alive
TCGA-FY-A40M-01	<=60	F	I	High exp	Alive
TCGA-EM-A2OZ-01	>60	M	I	Low exp	Alive
TCGA-BJ-A28X-01	<=60	F	I	High exp	Alive
TCGA-EL-A3GW-01	<=60	F	I	High exp	Alive
TCGA-BJ-A0Z2-01	<=60	M	IV	Low exp	Alive
TCGA-EM-A3FQ-06	<=60	F	I	High exp	Alive
TCGA-IM-A41Y-01	<=60	F	I	High exp	Alive
TCGA-DJ-A13L-01	>60	M	I	Low exp	Alive
TCGA-DO-A1JZ-01	<=60	F	I	High exp	Alive
TCGA-ET-A25L-01	<=60	F	IV	High exp	Alive
TCGA-EL-A3MX-01	>60	F	IV	High exp	Dead
TCGA-FY-A3W9-01	>60	F	II	Low exp	Alive
TCGA-ET-A2MY-01	>60	F	I	High exp	Alive
TCGA-EL-A3T8-01	<=60	M	I	High exp	Alive
TCGA-ET-A25R-01	<=60	F	III	High exp	Alive
TCGA-DJ-A1QL-01	>60	M	II	Low exp	Alive
TCGA-L6-A4ET-01	<=60	F	IV	Low exp	Alive
TCGA-ET-A25P-01	<=60	F	I	High exp	Alive
TCGA-E3-A3E5-01	<=60	M	IV	High exp	Alive
TCGA-EM-A3FK-01	<=60	F	I	High exp	Alive
TCGA-EL-A3GU-01	>60	F	III	High exp	Alive
TCGA-H2-A3RI-01	<=60	F	I	Low exp	Alive
TCGA-DJ-A3V8-01	<=60	F	I	High exp	Alive
TCGA-EM-A3SU-06	<=60	F	I	High exp	Alive
TCGA-DJ-A2Q9-01	>60	F	III	Low exp	Alive
TCGA-EL-A3CV-01	<=60	M	I	Low exp	Alive
TCGA-BJ-A45F-01	<=60	F	I	Low exp	Alive
TCGA-KS-A41L-01	<=60	F	I	Low exp	Alive
TCGA-J8-A3NZ-01	<=60	F	III	High exp	Alive
TCGA-DO-A1K0-01	<=60	F	I	High exp	Alive
TCGA-E3-A3DZ-01	<=60	F	III	Low exp	Alive
TCGA-EM-A3SX-01	<=60	F	I	Low exp	Alive
TCGA-DJ-A3VI-01	<=60	F	III	Low exp	Alive
TCGA-ET-A39J-01	<=60	F	I	High exp	Alive
TCGA-DJ-A1QI-01	>60	F	II	High exp	Alive
TCGA-EL-A3N3-01	<=60	F	II	Low exp	Alive
TCGA-L6-A4EP-01	<=60	F	I	High exp	Alive
TCGA-DJ-A13V-01	<=60	F	I	High exp	Alive
TCGA-DE-A2OL-01	<=60	F	I	Low exp	Alive
TCGA-FY-A3I4-01	<=60	F	I	High exp	Alive
TCGA-EM-A4FQ-01	<=60	F	I	High exp	Alive
TCGA-EM-A2P1-01	<=60	M	I	Low exp	Alive
TCGA-EM-A2OV-01	>60	F	II	Low exp	Alive
TCGA-EL-A3GQ-01	>60	F	I	High exp	Alive
TCGA-EL-A4JV-01	<=60	F	I	High exp	Alive
TCGA-EL-A3T3-01	>60	M	II	High exp	Alive
TCGA-CE-A3ME-01	<=60	F	II	Low exp	Alive
TCGA-DJ-A3VK-01	>60	M	III	High exp	Alive
TCGA-EL-A3D1-01	<=60	M	I	High exp	Alive
TCGA-BJ-A0Z9-01	<=60	F	III	Low exp	Alive
TCGA-E3-A3E3-01	<=60	F	II	Low exp	Alive
TCGA-KS-A4ID-01	<=60	F	I	Low exp	Alive
TCGA-FY-A40N-01	<=60	F	I	High exp	Alive
TCGA-BJ-A18Z-01	<=60	M	IV	High exp	Alive
TCGA-EL-A3ZO-01	>60	F	III	Low exp	Alive
TCGA-FE-A233-01	<=60	F	I	High exp	Alive
TCGA-DJ-A4UW-01	<=60	F	I	High exp	Alive
TCGA-DE-A4M8-01	>60	F	III	Low exp	Alive
TCGA-EM-A3AL-01	<=60	F	I	Low exp	Alive
TCGA-J8-A3YH-06	<=60	M	I	High exp	Alive
TCGA-FE-A236-01	<=60	M	I	High exp	Alive
TCGA-4C-A93U-01	>60	F	IV	Low exp	Alive
TCGA-BJ-A28Z-01	<=60	F	III	Low exp	Alive
TCGA-EM-A3AK-01	>60	F	I	High exp	Alive
TCGA-EL-A3CS-01	>60	F	IV	Low exp	Dead
TCGA-FY-A3R6-01	<=60	F	IV	High exp	Alive
TCGA-KS-A4I9-01	<=60	F	I	Low exp	Alive
TCGA-EM-A2CJ-01	<=60	F	I	Low exp	Alive
TCGA-CE-A484-01	<=60	F	I	Low exp	Alive
TCGA-ET-A25M-01	<=60	M	I	High exp	Alive
TCGA-DO-A2HM-01	<=60	M	IV	Low exp	Alive
TCGA-DJ-A13M-01	<=60	F	I	High exp	Alive
TCGA-ET-A3BP-01	<=60	F	I	Low exp	Alive
TCGA-EL-A3TA-01	<=60	M	I	High exp	Alive
TCGA-EM-A22J-01	<=60	F	II	Low exp	Alive
TCGA-IM-A3U3-01	<=60	F	I	High exp	Alive
TCGA-EM-A2CP-01	<=60	F	I	Low exp	Alive
TCGA-EM-A22L-01	<=60	F	I	High exp	Alive
TCGA-DE-A4M9-01	<=60	M	I	Low exp	Alive
TCGA-DJ-A3UK-01	<=60	F	I	High exp	Alive
TCGA-DE-A4MC-01	<=60	F	I	High exp	Alive
TCGA-EL-A3T0-01	<=60	F	III	High exp	Alive
TCGA-ET-A3BW-01	<=60	F	I	High exp	Alive
TCGA-EL-A3ZQ-01	>60	F	II	High exp	Alive
TCGA-E8-A413-01	<=60	F	I	Low exp	Alive
TCGA-DJ-A3V6-01	<=60	M	III	Low exp	Alive
TCGA-EM-A22P-01	>60	M	IV	High exp	Alive
TCGA-FK-A3SG-01	<=60	F	I	High exp	Alive
TCGA-DJ-A2Q0-01	<=60	F	II	Low exp	Alive
TCGA-BJ-A4O8-01	<=60	M	III	High exp	Alive
TCGA-EM-A22M-01	<=60	M	I	High exp	Alive
TCGA-DE-A4MA-01	<=60	F	III	High exp	Alive
TCGA-DE-A4MD-01	>60	M	IV	Low exp	Alive
TCGA-EL-A3CY-01	<=60	M	I	Low exp	Alive
TCGA-FE-A3PB-01	<=60	F	I	Low exp	Alive
TCGA-EM-A3AR-01	<=60	M	I	High exp	Alive
TCGA-EM-A3OB-01	<=60	F	I	High exp	Alive
TCGA-DJ-A3UX-01	<=60	F	I	High exp	Alive
TCGA-KS-A4I1-01	<=60	F	I	High exp	Alive
TCGA-EL-A3ZG-01	<=60	M	I	High exp	Alive
TCGA-ET-A2N5-01	<=60	F	III	High exp	Alive
TCGA-ET-A3DT-01	<=60	F	I	Low exp	Alive
TCGA-EL-A3GX-01	<=60	F	I	Low exp	Alive
TCGA-EM-A2OW-01	<=60	F	I	Low exp	Alive
TCGA-EM-A2CO-01	>60	F	II	Low exp	Alive
TCGA-EM-A22K-01	<=60	F	IV	High exp	Alive
TCGA-DJ-A3VE-01	<=60	M	I	High exp	Alive
TCGA-BJ-A2P4-01	<=60	F	I	Low exp	Alive
TCGA-EM-A4FU-01	<=60	M	I	Low exp	Alive
TCGA-FE-A3PC-01	<=60	F	I	Low exp	Alive
TCGA-EM-A3SU-01	<=60	F	I	High exp	Alive
TCGA-EM-A4G1-01	<=60	F	I	Low exp	Alive
TCGA-KS-A4IB-01	<=60	F	I	High exp	Alive
TCGA-ET-A3DR-01	<=60	F	I	High exp	Alive
TCGA-EM-A2OY-01	<=60	F	II	Low exp	Alive
TCGA-ET-A39T-01	<=60	F	III	Low exp	Alive
TCGA-EM-A1YE-01	<=60	F	II	Low exp	Alive
TCGA-ET-A25N-01	<=60	F	I	High exp	Alive
TCGA-CE-A3MD-01	<=60	M	I	High exp	Alive
TCGA-L6-A4EQ-01	<=60	M	III	High exp	Alive
TCGA-EM-A3FN-01	<=60	F	I	Low exp	Alive
TCGA-FY-A3NM-01	<=60	F	III	Low exp	Alive
TCGA-DJ-A2PX-01	<=60	F	I	High exp	Alive
TCGA-EM-A2P0-01	<=60	M	I	High exp	Alive
TCGA-EL-A3GS-01	<=60	F	I	High exp	Alive
TCGA-EM-A1CT-01	>60	M	IV	Low exp	Alive
TCGA-EM-A4FR-01	<=60	M	I	Low exp	Alive
TCGA-EL-A4KD-01	<=60	M	I	High exp	Alive
TCGA-ET-A4KQ-01	<=60	F	II	High exp	Alive
TCGA-FE-A231-01	>60	M	IV	Low exp	Alive
TCGA-EL-A3H4-01	<=60	F	IV	High exp	Alive
TCGA-FE-A238-01	<=60	F	I	Low exp	Alive
TCGA-DJ-A3UW-01	<=60	F	I	Low exp	Alive
TCGA-EM-A3AQ-01	>60	F	I	High exp	Alive
TCGA-EL-A4JX-01	<=60	F	I	Low exp	Alive
TCGA-EL-A3D5-01	<=60	F	I	Low exp	Alive
TCGA-ET-A3DQ-01	<=60	F	I	High exp	Alive
