# Supplementary material for: Differential expression of zinc finger CCHC-type superfamily proteins in thyroid carcinoma and their associations with tumor immunity
Source: Thyroid Res. 2023 Oct 17;16:42. doi: 10.1186/s13044-023-00185-1 (PMC10580525; doi:10.1186/s13044-023-00185-1)
Supplement: Supplementary file 3 — Supplementary Material 3: Table S3. ZCCHC12 expression and its correlation with THCA survival and staging [file 13044_2023_185_MOESM3_ESM.xlsx]

## Sheet: PPI
Table S3. PPI network of ZZCH12 and its correlation with immune and tumor stemness and tumor mutational load
#node1	node2	node1_string_id	node2_string_id	neighborhood_on_chromosome	gene_fusion	phylogenetic_cooccurrence	homology	coexpression	experimentally_determined_interaction	database_annotated	automated_textmining	combined_score
ASPRV1	ZCCHC12	9606.ENSP00000315383	9606.ENSP00000308921	0	0	0	0	0	0	0	0.647	0.647
LAMA3	LAMA4	9606.ENSP00000324532	9606.ENSP00000230538	0	0	0	0.785	0.05	0	0.9	0.499	0.911
LAMA3	ZCCHC12	9606.ENSP00000324532	9606.ENSP00000308921	0	0	0	0	0	0	0	0.581	0.581
LAMA4	ZCCHC12	9606.ENSP00000230538	9606.ENSP00000308921	0	0	0	0	0	0	0	0.586	0.586
PNMA1	ZCCHC12	9606.ENSP00000318914	9606.ENSP00000308921	0	0	0	0.76	0.076	0.49	0	0.09	0.514
PNMA1	PNMAL1	9606.ENSP00000318914	9606.ENSP00000318131	0	0	0	0.767	0.083	0.784	0	0.414	0.812
PNMAL1	ZCCHC12	9606.ENSP00000318131	9606.ENSP00000308921	0	0	0	0	0.154	0	0	0.571	0.622
PNMAL1	RGAG4	9606.ENSP00000318131	9606.ENSP00000476792	0	0	0	0	0.071	0	0	0.719	0.728
PNMAL1	RGAG1	9606.ENSP00000318131	9606.ENSP00000419786	0	0	0	0	0.062	0	0	0.795	0.8
RGAG1	ZCCHC12	9606.ENSP00000419786	9606.ENSP00000308921	0	0	0	0	0.071	0	0	0.555	0.569
RGAG1	RGAG4	9606.ENSP00000419786	9606.ENSP00000476792	0	0	0	0.56	0.062	0	0	0.865	0.416
RGAG4	ZCCHC12	9606.ENSP00000476792	9606.ENSP00000308921	0	0	0	0	0.1	0	0	0.482	0.513
SMAD1	SMAD7	9606.ENSP00000426568	9606.ENSP00000262158	0	0	0	0.623	0.062	0.356	0.9	0.598	0.948
SMAD1	ZCCHC12	9606.ENSP00000426568	9606.ENSP00000308921	0	0	0	0	0	0.486	0	0.282	0.615
SMAD7	ZCCHC12	9606.ENSP00000262158	9606.ENSP00000308921	0	0	0	0	0	0	0	0.692	0.692
SUMO1	ZCCHC12	9606.ENSP00000376077	9606.ENSP00000308921	0	0	0	0	0	0.677	0	0	0.677

## Sheet: Immunological relevance
Table S3. PPI network of ZZCH12 and its correlation with immune and tumor stemness and tumor mutational load
	ZCCHC12	B.cell	T.cell.CD4.	T.cell.CD8.	Neutrophil	Macrophage	Myeloid.dendritic.cell
TCGA-4C-A93U-01	8.66809	0.24685	0.164607	0	0.161152	0.0437761	0.789354
TCGA-BJ-A0YZ-01	0.586501	0	0.0874414	0.215785	0.0695148	0.0634093	0.330669
TCGA-BJ-A0Z0-01	9.17867	0.166428	0.0697554	0.264083	0.0526369	0.115076	0.305838
TCGA-BJ-A0Z2-01	8.5565	0.0668981	0.126789	0.143435	0.0483413	0.0739601	0.237255
TCGA-BJ-A0Z3-01	7.64891	0.407122	0.49551	0.101894	0.148944	0.0633103	0.670506
TCGA-BJ-A0Z5-01	9.18158	0.00816158	0.115992	0.0719117	0.0704782	0.0217632	0.3813
TCGA-BJ-A0Z9-01	8.38804	0.134121	0.185432	0.150934	0.213398	0.110381	0.762187
TCGA-BJ-A0ZA-01	8.81149	0.073539	0.0924908	0.252976	0.0719942	0.20233	0.315398
TCGA-BJ-A0ZB-01	9.19773	0.0294801	0.119458	0.11902	0.0857557	0.0685308	0.375029
TCGA-BJ-A0ZC-01	0.227987	0.0910633	0.0749087	0.276039	0.0613934	0.0764181	0.311426
TCGA-BJ-A0ZE-01	7.58702	0	0.0971592	0	0	0.0066163	0.160181
TCGA-BJ-A0ZG-01	0.721504	0.0480666	0.101281	0.235326	0.0568517	0.0638746	0.331579
TCGA-BJ-A0ZH-01	8.06877	0.0190106	0.11783	0.0482904	0.0958382	0	0.406844
TCGA-BJ-A0ZJ-01	8.94355	0.229781	0.384468	0.124666	0.119078	0.0304865	0.691429
TCGA-BJ-A18Y-01	9.69953	0.0468439	0.124692	0.116594	0.0494052	0.0913221	0.297334
TCGA-BJ-A18Z-01	8.93354	0.121492	0.177121	0.0746163	0.102155	0.0611972	0.638047
TCGA-BJ-A190-01	0.866948	0.0399209	0.106411	0.0756803	0.0335667	0.00395728	0.16885
TCGA-BJ-A191-01	7.67774	0.0547946	0.17241	0.2215	0.0922307	0.0612885	0.306273
TCGA-BJ-A192-01	1.05109	0	0.00866402	0.235156	0.1405	0.0899519	0.294333
TCGA-BJ-A28R-01	10.3016	0.179948	0.146913	0.23959	0.1469	0.136324	0.578494
TCGA-BJ-A28S-01	9.76711	0.038826	0.0931393	0.170977	0.0455368	0.114124	0.208877
TCGA-BJ-A28T-01	5.64565	0.349224	0.515152	0.237802	0.187031	0.0655127	1.05032
TCGA-BJ-A28V-01	0.388245	0.0865378	0.061208	0.290647	0.0698963	0.117267	0.292478
TCGA-BJ-A28W-01	2.01799	0.570556	1.00793	0	0.105896	0	0.70983
TCGA-BJ-A28X-01	9.19769	0.251226	0.497331	0.16672	0.227276	0.165009	0.835189
TCGA-BJ-A28Z-01	8.24675	0.212652	0.400703	0.106542	0.193868	0.134609	0.940641
TCGA-BJ-A290-01	12.9396	0.0432741	0.143137	0.0882073	0.0701083	0.0392924	0.277679
TCGA-BJ-A291-01	1.40359	0	0.106538	0.0635202	0.0345222	0	0.151161
TCGA-BJ-A2N7-01	11.383	0.0233724	0.0845984	0.162307	0.047287	0.104584	0.241766
TCGA-BJ-A2N8-01	11.6364	0.0168546	0.0119995	0.233134	0.0653002	0.0573182	0.393504
TCGA-BJ-A2N9-01	0.461424	0.190205	0.0402775	0	0	0	0.334376
TCGA-BJ-A2NA-01	8.1378	0.0639607	0.0852304	0.291283	0.160285	0.0520923	0.650647
TCGA-BJ-A2P4-01	8.49851	0	0.093654	0	0.005492	0	0.185505
TCGA-BJ-A3EZ-01	6.10759	0.119201	0.0983321	0.138209	0.146021	0.043265	0.464439
TCGA-BJ-A3F0-01	0.949273	0	0.0865149	0.087063	0.0365203	0	0.226463
TCGA-BJ-A3PR-01	6.11482	0.615576	0.813717	0.155225	0.254955	0	0.981123
TCGA-BJ-A3PT-01	7.7941	0	0.212628	0	0.0534788	0	0.382838
TCGA-BJ-A3PU-01	7.24604	0.0538871	0.0954765	0.0247469	0.07812	0	0.421729
TCGA-BJ-A45C-01	4.92602	0.00879206	0.132929	0.103618	0.0369624	0.0118428	0.191301
TCGA-BJ-A45D-01	7.48566	0	0.0944505	0	0.016179	0	0.303759
TCGA-BJ-A45E-01	0.256648	0.255587	0.473461	0	0.115861	0	0.799667
TCGA-BJ-A45F-01	4.23547	0	0.0966825	0	0.011663	0.00157691	0.152708
TCGA-BJ-A45G-01	8.52446	0.0424094	0.0725574	0.216172	0.0530911	0.0885583	0.293593
TCGA-BJ-A45H-01	11.0393	0.0243652	0.105068	0.22172	0.109084	0.086504	0.471534
TCGA-BJ-A45I-01	7.15321	0.0517572	0.24061	0.0573208	0.167223	0	0.595511
TCGA-BJ-A45J-01	9.92695	0	0.089995	0.0929673	0.160472	0	0.491795
TCGA-BJ-A45K-01	0.691981	0.0401058	0.0957236	0.162318	0.0523846	0.0446586	0.255235
TCGA-BJ-A4O8-01	10.4718	0	0.304769	0.000788842	0.162147	0.0527751	0.735244
TCGA-BJ-A4O9-01	10.5593	0.100077	0.0480396	0.271092	0.0699135	0.0916267	0.398674
TCGA-CE-A13K-01	11.11	0.0426233	0.129091	0.181424	0.121038	0.169067	0.383306
TCGA-CE-A27D-01	8.72214	0.311241	0.402368	0.0822693	0.153175	0.0290807	0.69266
TCGA-CE-A3MD-01	9.6297	0.045605	0.170982	0.0290906	0.0919448	0.108018	0.336118
TCGA-CE-A3ME-01	8.07645	0.128222	0.0681674	0.225223	0.158636	0.0501559	0.55662
TCGA-CE-A481-01	9.76878	0.0803324	0.21332	0.25124	0.123058	0.180762	0.46738
TCGA-CE-A482-01	11.0626	0.0801911	0.0890807	0.194726	0.124528	0.14186	0.417504
TCGA-CE-A483-01	8.93925	0.0437117	0.0430767	0.315042	0.122828	0.125039	0.398761
TCGA-CE-A484-01	5.88621	0	0.11713	0.0304475	0.0288723	0.00784836	0.169897
TCGA-CE-A485-01	9.59676	0.0596032	0.204749	0.135829	0.167383	0.169024	0.580208
TCGA-DE-A0XZ-01	9.25194	0.102127	0.303033	0.137353	0.166169	0.154553	0.530974
TCGA-DE-A0Y2-01	10.8755	0.0555574	0.0967063	0.359888	0.192223	0.167451	0.667526
TCGA-DE-A0Y3-01	9.4122	0.127499	0.0226772	0.368252	0.166225	0.0932703	0.606648
TCGA-DE-A2OL-01	4.09044	0.0794421	0.0447071	0.30941	0.0759002	0.118996	0.264372
TCGA-DE-A3KN-01	9.67154	0.0817777	0.0883471	0.294229	0.0995141	0.100771	0.486636
TCGA-DE-A4M8-01	8.53494	0.281368	0.362805	0.191111	0.166335	0.127964	0.82409
TCGA-DE-A4M9-01	3.20627	0.0252021	0.0931676	0.292448	0.0713042	0.0767829	0.323138
TCGA-DE-A4MA-01	8.89348	0.0162261	0.0686551	0	0	0	0.36483
TCGA-DE-A4MB-01	8.47099	0.0463579	0.163886	0	0.220926	0	0.697091
TCGA-DE-A4MC-01	8.83288	0.0413431	0.258959	0.117158	0.148872	0	0.654633
TCGA-DE-A4MD-06	4.3475	0	0.130255	0	0.0623209	0	0.25669
TCGA-DE-A4MD-01	4.00551	0.0159973	0.0457239	0.198499	0.100542	0.0160921	0.366923
TCGA-DE-A69J-01	10.4173	0.175576	0.0815258	0.222102	0.13866	0.070998	0.790338
TCGA-DE-A69K-01	10.0858	0.165222	0.0583938	0.329216	0.128063	0.121227	0.656015
TCGA-DE-A7U5-01	6.73688	0	0.227957	0.11506	0.272897	0.0136561	0.856042
TCGA-DJ-A13L-01	6.01221	0.180197	0.257019	0	0.160882	0.0200318	0.822925
TCGA-DJ-A13M-01	8.72771	0	0.0846994	0.0502633	0.0146286	0	0.183569
TCGA-DJ-A13O-01	6.96863	0.0264523	0.245526	0.0537346	0.0828826	0	0.431035
TCGA-DJ-A13P-01	8.42506	0.0488104	0.0798946	0.312731	0.108267	0.136695	0.50257
TCGA-DJ-A13R-01	0.278461	0	0.16221	0.0957934	0.0171967	0	0.218602
TCGA-DJ-A13S-01	8.67667	0.0381998	0.0852313	0.165378	0.0396714	0.171741	0.269591
TCGA-DJ-A13T-01	11.6768	0.107318	0.0514803	0.354886	0.171597	0.234834	0.440702
TCGA-DJ-A13U-01	8.02049	0.180788	0.0472501	0.239248	0.111627	0.0751224	0.466646
TCGA-DJ-A13V-01	11.8984	0.0472899	0.106522	0.25207	0.10677	0.0719849	0.400028
TCGA-DJ-A13W-01	0.24306	0	0	0	0	0	0
TCGA-DJ-A13X-01	9.86827	0.0743744	0.112326	0.307244	0.158429	0.167987	0.533547
TCGA-DJ-A1QD-01	9.8787	0.179291	0.00176913	0.380333	0.176855	0.124523	0.687432
TCGA-DJ-A1QE-01	7.70302	0.107876	0.135625	0.276424	0.19231	0.103183	0.658447
TCGA-DJ-A1QF-01	9.36725	0.0754485	0.0724598	0.308334	0.119621	0.248637	0.489894
TCGA-DJ-A1QG-01	7.04756	0.040086	0.098886	0.0782389	0.0664658	0.110076	0.24248
TCGA-DJ-A1QH-01	7.65492	0.113354	0.0806495	0.292937	0.145894	0.207728	0.576485
TCGA-DJ-A1QI-01	9.57738	0.124633	0.0510734	0.46172	0.145201	0.261246	0.730888
TCGA-DJ-A1QL-01	1.82952	0.0311739	0.11752	0.128864	0.0537193	0.053499	0.238302
TCGA-DJ-A1QM-01	6.68309	0.0263948	0.192083	0.117459	0.115284	0.0955718	0.490545
TCGA-DJ-A1QN-01	10.7678	0	0.216369	0.069681	0.14842	0.181797	0.57414
TCGA-DJ-A1QO-01	5.72265	0.0442697	0.17381	0.0770116	0.169184	0.0622016	0.735123
TCGA-DJ-A1QQ-01	9.86536	0.0594307	0.100258	0.412313	0.166094	0.172049	0.608415
TCGA-DJ-A2PN-01	8.73943	0.0843624	0.100497	0.290639	0.177677	0.0774026	0.526965
TCGA-DJ-A2PO-01	9.21093	0.0772836	0.19913	0.295668	0.17311	0.231818	0.6963
TCGA-DJ-A2PP-01	6.10585	0.140503	0	0.450869	0.111079	0.161917	0.399063
TCGA-DJ-A2PQ-01	8.2074	0.076488	0.057692	0.330653	0.109206	0.165573	0.442468
TCGA-DJ-A2PR-01	12.4897	0.101357	0.1915	0.431803	0.201491	0.21157	0.596085
TCGA-DJ-A2PS-01	11.516	0.101783	0.150434	0.315572	0.165058	0.225662	0.534507
TCGA-DJ-A2PT-01	7.52299	0.0497891	0.175845	0	0.131348	0	0.82723
TCGA-DJ-A2PU-01	10.4387	0.0529598	0.128607	0.276585	0.124654	0.185796	0.520026
TCGA-DJ-A2PV-01	9.31728	0.115523	0.0641986	0.42741	0.171224	0.244809	0.63022
TCGA-DJ-A2PW-01	8.94049	0.0309709	0.145557	0.243105	0.133176	0.14906	0.571079
TCGA-DJ-A2PX-01	9.50076	0.193231	0.247311	0.314643	0.137172	0.214311	0.568885
TCGA-DJ-A2PY-01	9.29363	0.169228	0.0755535	0.3384	0.203837	0.21997	0.709894
TCGA-DJ-A2PZ-01	6.65268	0.052634	0.135757	0.150288	0.120424	0.105063	0.515653
TCGA-DJ-A2Q0-01	0.227002	0.0244511	0.0992176	0.0177716	0.0339427	0.005906	0.19581
TCGA-DJ-A2Q1-01	2.45631	0.370959	0.15075	0	0.0842632	0	0.788241
TCGA-DJ-A2Q2-01	4.49422	0.141771	0.0892504	0.317065	0.10685	0.241485	0.427688
TCGA-DJ-A2Q3-01	8.89781	0.25595	0.215602	0.213426	0.186596	0.118278	0.889355
TCGA-DJ-A2Q4-01	9.83897	0.0672263	0.177309	0.210644	0.14505	0.0902413	0.592302
TCGA-DJ-A2Q5-01	10.3734	0.427392	0.366222	0.187602	0.154028	0.09013	0.864479
TCGA-DJ-A2Q6-01	11.033	0.065844	0.119806	0.3341	0.14554	0.174963	0.635286
TCGA-DJ-A2Q7-01	8.88339	0.0957984	0.107692	0.248045	0.109687	0.123291	0.487831
TCGA-DJ-A2Q9-01	3.44751	0.803622	0.575225	0	0.330989	0.0819663	1.53814
TCGA-DJ-A2QA-01	8.43064	0	0.0781204	0	0.00837909	0	0.171022
TCGA-DJ-A2QB-01	8.50791	0.0372598	0.0725264	0.144359	0.0497371	0.126574	0.286701
TCGA-DJ-A2QC-01	10.0273	0	0.121638	0.0548812	0.0406896	0	0.295093
TCGA-DJ-A3UK-01	10.0232	0.101254	0.0840427	0.214704	0.119691	0.150603	0.426595
TCGA-DJ-A3UM-01	9.74487	0.0328256	0.1069	0.245421	0.134134	0.146691	0.530363
TCGA-DJ-A3UN-01	12.1166	0.093564	0.0940519	0.152995	0.0912247	0.0987187	0.462641
TCGA-DJ-A3UO-01	13.6273	0	0.0756821	0.173048	0.11711	0.0842844	0.462199
TCGA-DJ-A3UP-01	12.7377	0.083532	0.0641401	0.286808	0.0679737	0.158887	0.337824
TCGA-DJ-A3UQ-01	9.31264	0.164088	0.154066	0.0778915	0.115619	0	0.890349
TCGA-DJ-A3UR-01	6.5297	0.107715	0.105964	0.181376	0.0673248	0.0863261	0.409972
TCGA-DJ-A3US-01	8.77085	0.19746	0.327081	0.236367	0.13253	0.0376623	0.698661
TCGA-DJ-A3UT-01	8.83379	0	0.105927	0.0435295	0.0135351	0	0.208671
TCGA-DJ-A3UU-01	11.3853	0.0425429	0.129451	0.353278	0.14446	0.169683	0.576303
TCGA-DJ-A3UW-01	6.26106	0.307186	0.234724	0.0211542	0.103948	0	0.715736
TCGA-DJ-A3UX-01	11.0667	0.12739	0.0925898	0.307862	0.123484	0.0667252	0.519591
TCGA-DJ-A3UY-01	8.00166	0.0487136	0.156976	0.175612	0.145308	0.141296	0.634754
TCGA-DJ-A3UZ-01	10.7809	0.125062	0.146548	0.271915	0.0984275	0.103663	0.435865
TCGA-DJ-A3V0-01	6.7749	0	0.120061	0.0583408	0.0937497	0.0185732	0.346273
TCGA-DJ-A3V2-01	8.87339	0.063725	0.270813	0.289838	0.143847	0.157965	0.671331
TCGA-DJ-A3V3-01	8.85605	0.0391945	0.193587	0.0984386	0.0864356	0.0264735	0.460974
TCGA-DJ-A3V4-01	9.78742	0.219938	0.0568674	0.191059	0.0943492	0.0777658	0.548647
TCGA-DJ-A3V5-01	7.71074	0.0957748	0.125653	0.168236	0.131559	0.0936226	0.546469
TCGA-DJ-A3V7-01	7.72757	0.0291604	0.0844456	0.136341	0.121349	0.0149581	0.431909
TCGA-DJ-A3V8-01	9.88172	0.0913762	0.063005	0.173053	0.112066	0.0186558	0.519116
TCGA-DJ-A3V9-01	12.9953	0.0535387	0.070162	0.348804	0.137619	0.172398	0.550231
TCGA-DJ-A3VA-01	9.26633	0.102823	0.0430806	0.331962	0.107761	0.119302	0.511803
TCGA-DJ-A3VB-01	9.38498	0.00382685	0.13554	0.0172092	0.120278	0	0.500524
TCGA-DJ-A3VD-01	4.37448	0.340826	0.517582	0.0218212	0.253424	0.0697556	1.09628
TCGA-DJ-A3VE-01	9.01668	0.0423076	0.0959767	0.271482	0.120327	0.182766	0.508025
TCGA-DJ-A3VF-01	8.31679	0	0.216068	0.090059	0.190328	0	0.946894
TCGA-DJ-A3VG-01	9.71852	0.0121147	0.10645	0.0744776	0.0256349	0.0208336	0.208235
TCGA-DJ-A3VI-01	8.0634	0.0359524	0.0768714	0.186421	0.120048	0.0635863	0.381521
TCGA-DJ-A3VJ-01	10.4883	0.032248	0.118841	0.240156	0.152149	0.0002438	0.663211
TCGA-DJ-A3VK-01	11.4245	0.0219248	0.104387	0.138406	0.070093	0.0894449	0.260616
TCGA-DJ-A3VL-01	11.0989	0.0137429	0.195167	0.0868389	0.0266896	0.0436767	0.394168
TCGA-DJ-A3VM-01	6.90783	0.0375714	0.117181	0.0666504	0.0472826	0.0860388	0.208581
TCGA-DJ-A4UL-01	8.39051	0.00758318	0.160067	0.0865528	0.0650047	0	0.371807
TCGA-DJ-A4UP-01	11.4517	0.1546	0.333722	0.167363	0.148621	0.0885475	0.624242
TCGA-DJ-A4UQ-01	11.6778	0.0817189	0.139219	0.205317	0.121516	0.1343	0.481643
TCGA-DJ-A4UR-01	4.6848	0	0.117427	0	0.0196653	0	0.189926
TCGA-DJ-A4UT-01	9.5232	0.0493445	0.423016	0.117082	0.160078	0.0648625	0.710788
TCGA-DJ-A4UW-01	10.4297	0.0576316	0.155908	0.101922	0.0920705	0.0122208	0.524175
TCGA-DJ-A4V0-01	8.28274	0.279147	0.32169	0.294186	0.131959	0.0912151	0.711144
TCGA-DJ-A4V2-01	8.24129	0.0490639	0.162088	0.157125	0.218733	0.0574075	0.646159
TCGA-DJ-A4V4-01	9.25041	0.0831503	0.0984405	0.0799288	0.0505326	0	0.392778
TCGA-DJ-A4V5-01	9.59658	0.143466	0.33164	0.018993	0.19407	0.0349584	0.847091
TCGA-DO-A1JZ-01	13.5064	0.104572	0.0946686	0.231531	0.105936	0.0413984	0.440534
TCGA-DO-A1K0-01	8.74587	0.0570061	0.0657453	0.348576	0.175672	0.183339	0.536669
TCGA-DO-A2HM-01	6.75375	0.251314	0.713594	0	0.382693	0.00680763	1.4038
TCGA-E3-A3DY-01	8.97563	0.0987606	0.125583	0.32326	0.135603	0.223649	0.625577
TCGA-E3-A3DZ-01	8.09305	0.101109	0.0529129	0.234117	0.051665	0.0561738	0.306316
TCGA-E3-A3E0-01	11.9698	0.112006	0.074723	0.277947	0.112834	0.0856715	0.451564
TCGA-E3-A3E1-01	9.86786	0.0836319	0.112765	0.167688	0.112657	0.102267	0.534389
TCGA-E3-A3E2-01	11.5314	0.397282	0.313469	0.133244	0.116578	0.0347	0.62795
TCGA-E3-A3E3-01	8.40962	0.082662	0.0976411	0.17056	0.11123	0.0550762	0.505382
TCGA-E3-A3E5-01	11.2058	0.0691168	0.109059	0.107233	0.0595178	0.0465485	0.353283
TCGA-E8-A242-01	8.83584	0.00175909	0.226871	0.171133	0.154389	0.0446265	0.807663
TCGA-E8-A2EA-01	8.42823	0.0374806	0.284806	0.0206354	0.156135	0.0225696	0.689534
TCGA-E8-A2JQ-01	6.53845	0.218785	0.379852	0.181478	0.168676	0	0.793766
TCGA-E8-A3X7-01	8.27065	0.0839207	0.0754273	0.0371059	0.0418591	0	0.408016
TCGA-E8-A413-01	6.70444	0.106774	0.185786	0.0638925	0.13676	0.109807	0.658136
TCGA-E8-A414-01	6.93354	0.119669	0.182376	0.196744	0.214211	0.125211	0.797032
TCGA-E8-A415-01	8.22723	0.0514738	0.0568008	0.21572	0.10082	0.0970995	0.498903
TCGA-E8-A416-01	1.42637	0.0419282	0.147174	0.198084	0.0708684	0.0519513	0.355372
TCGA-E8-A417-01	6.01802	0.208671	0.0718951	0.177327	0.112424	0.0607281	0.552517
TCGA-E8-A418-01	7.61051	0.113586	0.0733049	0.120686	0.128647	0.0108659	0.538898
TCGA-E8-A419-01	8.2938	0.173528	0.248056	0.0204559	0.169784	0.00943117	0.690173
TCGA-E8-A432-01	8.73553	0	0.183186	0.0554643	0.0996138	0.34958	0.373654
TCGA-E8-A433-01	8.60103	0	0.135181	0	0.0621911	0	0.339102
TCGA-E8-A434-01	5.76121	0.0661311	0.0996388	0.172053	0.0935753	0.0222264	0.472397
TCGA-E8-A436-01	7.45397	0.0277628	0.204152	0.108865	0.169645	0.0466894	0.702881
TCGA-E8-A437-01	5.96058	0.00247267	0.121366	0	0.0324096	0	0.270147
TCGA-E8-A438-01	9.76081	0.00330699	0.129682	0	0.0239998	0	0.232151
TCGA-E8-A44K-01	8.14418	0.00154018	0.133602	0.041156	0.0828118	0	0.439548
TCGA-E8-A44M-01	9.20541	0.175631	0.494058	0.157362	0.171626	0.0532089	0.824209
TCGA-EL-A3CL-01	10.5137	0.0307536	0.0626426	0.286522	0.160515	0.130614	0.493814
TCGA-EL-A3CM-01	7.99492	0.0311132	0.115225	0.153912	0.138873	0.0554146	0.494076
TCGA-EL-A3CN-01	6.68131	0.0658616	0.277351	0.104642	0.232401	0.0687133	0.586265
TCGA-EL-A3CO-01	3.54573	0	0.258327	0.0469463	0.298924	0.0558826	1.13524
TCGA-EL-A3CP-01	8.39824	0.0886107	0.0742087	0.357583	0.143868	0.133742	0.529785
TCGA-EL-A3CR-01	7.9204	0.0108012	0.122161	0	0.207696	0.00925297	0.72578
TCGA-EL-A3CS-01	6.16092	0.100516	0.0291792	0.209067	0.11762	0	0.510861
TCGA-EL-A3CT-01	9.95687	0.111404	0.00899716	0.42326	0.239964	0.059903	1.01275
TCGA-EL-A3CU-01	8.54573	0.394286	0.272732	0.210543	0.170898	0.208996	0.865896
TCGA-EL-A3CV-01	6.96235	0.238938	0.222609	0.552535	0.375182	0.179996	1.21269
TCGA-EL-A3CW-01	5.12028	0.352698	0.519218	0.145297	0.172221	0.0599807	0.659519
TCGA-EL-A3CX-01	6.30865	0	0.152964	0	0.0937375	0.0308715	0.449425
TCGA-EL-A3CY-01	8.52607	0.263196	0.908959	0.173027	0.389404	0.185753	1.497
TCGA-EL-A3CZ-01	10.2442	0.0937536	0.0461989	0.372258	0.0996878	0.169527	0.346252
TCGA-EL-A3D0-01	8.42574	0.0483492	0.0570943	0.188752	0.113895	0.092224	0.317099
TCGA-EL-A3D1-01	11.1155	0	0.112325	0	0.0472029	0	0.306574
TCGA-EL-A3D4-01	12.0227	0.0344975	0.0990803	0.11541	0.05098	0.0610666	0.351074
TCGA-EL-A3D5-01	1.63803	0.0816035	0.0615035	0.251202	0.0597414	0.0846828	0.314712
TCGA-EL-A3D6-01	8.52215	0.0530353	0.207122	0.0981134	0.167899	0.00896024	0.697755
TCGA-EL-A3GO-01	1.64718	0.0728771	0.136733	0.223496	0.102086	0.143756	0.354641
TCGA-EL-A3GP-01	3.93346	0.0581596	0.0951015	0	0.162927	0.441054	0.670075
TCGA-EL-A3GQ-01	9.69991	0.144664	0.0604225	0.429728	0.152917	0.234963	0.648976
TCGA-EL-A3GR-01	10.7943	0.0271675	0.123869	0.364197	0.295463	0.115546	0.827168
TCGA-EL-A3GS-01	8.8394	0.169459	0.0766395	0.374654	0.206348	0.151486	0.618196
TCGA-EL-A3GU-01	9.2006	0.0654413	0.16391	0.0298296	0.163716	0.0419049	0.479643
TCGA-EL-A3GV-01	9.55002	0.0457227	0.201069	0.255037	0.218131	0.268883	0.699718
TCGA-EL-A3GW-01	11.6988	0.153307	0.0117327	0.322374	0.096132	0.142808	0.391918
TCGA-EL-A3GX-01	7.64026	0.032562	0.196861	0.0969578	0.258158	0.0940082	0.846526
TCGA-EL-A3GY-01	8.76724	0.00554367	0.0919697	0.272127	0.260574	0.142348	0.718003
TCGA-EL-A3GZ-01	13.7087	0.0370185	0.140164	0.248395	0.131559	0.0609276	0.558071
TCGA-EL-A3H1-01	3.91316	0.0670671	0.101847	0.170957	0.0553831	0.147067	0.280759
TCGA-EL-A3H2-01	1.1903	0.0859777	0.0887985	0.231463	0.0774703	0.0905329	0.345614
TCGA-EL-A3H3-01	10.2237	0.0353193	0.194719	0	0.158605	0.148396	0.538608
TCGA-EL-A3H4-01	10.6195	0.110299	0	0.437273	0.238578	0.182234	0.613309
TCGA-EL-A3H5-01	3.97801	0	0.14102	0	0.0912554	0	0.347211
TCGA-EL-A3H7-01	8.26302	0.135375	0.196103	0.138098	0.142761	0	0.744651
TCGA-EL-A3H8-01	7.28067	0.105398	0.0361052	0.403366	0.161616	0.136475	0.621424
TCGA-EL-A3MW-01	8.6969	0	0.111627	0.114132	0.121025	0.152001	0.458819
TCGA-EL-A3MX-01	9.9696	0	0.111921	0	0.0343978	0	0.165416
TCGA-EL-A3MY-01	6.22243	0	0.283269	0.000834357	0.205416	0	0.923295
TCGA-EL-A3MZ-01	10.1563	0.0921395	0.15487	0.0139887	0.115918	0.0326945	0.50764
TCGA-EL-A3N2-01	9.39456	0.0693082	0.0973256	0.239921	0.186437	0.128855	0.467659
TCGA-EL-A3N3-01	6.88561	0.146249	0.150483	0.188638	0.196469	0.0499885	0.8106
TCGA-EL-A3T0-01	10.5716	0	0.0502423	0.329935	0.128487	0.127115	0.555504
TCGA-EL-A3T1-01	6.14641	0.0535891	0.140935	0.173548	0.274532	0.0531715	0.624521
TCGA-EL-A3T2-01	10.2455	0.0906312	0	0.420453	0.110087	0.159562	0.31707
TCGA-EL-A3T3-01	8.81533	0	0.0663048	0.123152	0.144156	0	0.535892
TCGA-EL-A3T6-01	8.20264	0.0814874	0.188091	0.14766	0.231504	0.00266224	0.79813
TCGA-EL-A3T7-01	9.86498	0	0.0222218	0.307803	0.16695	0.170641	0.578486
TCGA-EL-A3T8-01	9.32588	0.035833	0.0908492	0.248506	0.14638	0.122635	0.450369
TCGA-EL-A3T9-01	6.06776	0.0127204	0.174237	0	0.25403	0	0.697628
TCGA-EL-A3TA-01	9.49694	0	0.241692	0	0.0882296	0.0366662	0.510841
TCGA-EL-A3TB-01	9.69598	0.0169606	0.0791774	0.192025	0.0758807	0.0450593	0.356565
TCGA-EL-A3ZG-01	9.55568	0.0517066	0.0709498	0.150502	0.0575324	0.0600706	0.333273
TCGA-EL-A3ZH-01	9.83055	0.00175751	0.0376965	0.274677	0.0900022	0.0944672	0.321185
TCGA-EL-A3ZK-01	5.95441	0.0658024	0.093128	0.12366	0.210393	0.0866418	0.492092
TCGA-EL-A3ZL-01	9.26942	0	0.126074	0	0.0595302	0	0.218418
TCGA-EL-A3ZM-01	7.56763	0	0.079862	0	0.0834789	0	0.424805
TCGA-EL-A3ZN-01	11.6305	0.0206384	0.0679032	0.160953	0.0731494	0.0363337	0.327986
TCGA-EL-A3ZO-01	8.55948	0.0920545	0.208988	0	0.106051	0	0.680653
TCGA-EL-A3ZP-01	8.69264	0	0.307672	0.0582538	0.155316	0.0126425	0.587857
TCGA-EL-A3ZQ-01	8.79927	0	0.0746365	0	0	0	0.233165
TCGA-EL-A3ZR-01	10.0663	0.0125456	0.109393	0.0493625	0.0121737	0.0722433	0.179082
TCGA-EL-A3ZS-01	9.96843	0.154998	0.33856	0.248967	0.196975	0.103507	0.673559
TCGA-EL-A3ZT-01	9.41724	0	0.148438	0.130851	0.128593	0.0233121	0.458423
TCGA-EL-A4JV-01	8.93007	0.03394	0.109605	0.128437	0.0453191	0.0681825	0.224691
TCGA-EL-A4JW-01	7.55075	0.0789565	0.135162	0.176964	0.207328	0	0.61124
TCGA-EL-A4JX-01	7.446	0.371161	0.345102	0	0.160519	0	0.90686
TCGA-EL-A4JZ-01	9.4678	0.0660971	0.292635	0.0358995	0.146049	0.128294	0.699593
TCGA-EL-A4K0-01	9.61111	0.0529939	0.193482	0.312808	0.131861	0.337796	0.792391
TCGA-EL-A4K1-01	5.19892	0.0297874	0.0651424	0	0.0225828	0	0.244355
TCGA-EL-A4K2-01	7.70074	0	0.16193	0.0803703	0.108881	0.206039	0.438074
TCGA-EL-A4K4-01	6.47288	0	0.126195	0.251793	0.169499	0.14941	0.698728
TCGA-EL-A4K6-01	10.4606	0	0.0793334	0	0.00556797	0	0.0455869
TCGA-EL-A4K7-01	8.60232	0	0.0719055	0	0.0260578	0	0.186673
TCGA-EL-A4K9-01	11.7157	0.0683448	0.125996	0.130324	0.103794	0.133645	0.446099
TCGA-EL-A4KD-01	9.27976	0.0536971	0.116444	0.114671	0.0971548	0.075033	0.400144
TCGA-EL-A4KG-01	6.55359	0.0278774	0.190706	0.0156661	0.19249	0	0.59642
TCGA-EL-A4KH-01	10.0695	0	0.0987639	0	0.0271073	0	0.297791
TCGA-EL-A4KI-01	11.3403	0	0.0596184	0	0	0	0.0726572
TCGA-EM-A1CS-01	8.23603	0.120773	0.114411	0.29475	0.151407	0.23555	0.466627
TCGA-EM-A1CT-01	8.02404	0.155939	0.168289	0.110124	0.101766	0.118677	0.561253
TCGA-EM-A1CU-01	10.9995	0.061599	0.0763357	0.337018	0.169478	0.118809	0.552964
TCGA-EM-A1CV-01	11.0405	0.056137	0.0797752	0.347469	0.117873	0.255955	0.576186
TCGA-EM-A1CW-01	3.80019	0.0816998	0.12514	0.172889	0.0645785	0.0455488	0.384064
TCGA-EM-A1YA-01	0.385155	0.00724014	0.157552	0.0151637	0.0134788	0.0335062	0.226121
TCGA-EM-A1YB-01	1.92193	0	0.0689948	0	0.00987205	0	0.140862
TCGA-EM-A1YC-01	1.54656	0	0.119921	0	0.0216714	0.0817696	0.158746
TCGA-EM-A1YD-01	2.31996	0.00614839	0.113569	0.280263	0.100669	0.0695432	0.4001
TCGA-EM-A1YE-01	0.766722	0	0.110947	0.0162026	0.00770672	0	0.134309
TCGA-EM-A22I-01	8.81999	0.0219255	0.0968644	0.195004	0.172472	0.0319364	0.597626
TCGA-EM-A22J-01	6.39065	0.0421641	0.15255	0.0733126	0.044285	0.129128	0.268247
TCGA-EM-A22K-01	8.87926	0.0780783	0.119323	0.139501	0.0618613	0.113268	0.330858
TCGA-EM-A22L-01	8.86813	0.114489	0.0411541	0.270779	0.0490749	0.123742	0.313401
TCGA-EM-A22M-01	8.74339	0.34631	0.247171	0	0.101684	0	0.771559
TCGA-EM-A22N-01	1.71857	0	0.119293	0.00972767	0.0254773	0	0.204313
TCGA-EM-A22O-01	8.57461	0.190081	0.0388301	0.123129	0.0526671	0	0.500368
TCGA-EM-A22P-01	9.25548	0.405385	0.504612	0.0492291	0.189011	0.147707	0.846235
TCGA-EM-A22Q-01	3.61306	0	0.0167927	0	0	0	0
TCGA-EM-A2CJ-01	0.741057	0.0203735	0.0927522	0.0791804	0.041037	0.0587642	0.177933
TCGA-EM-A2CK-01	10.17	0.0517473	0.0630355	0.231326	0.0480702	0.0583658	0.248596
TCGA-EM-A2CL-01	5.37732	0.0755468	0.0504035	0.30121	0.0535193	0.072633	0.261909
TCGA-EM-A2CN-01	9.26867	0	0.120585	0.0609479	0.0283591	0	0.169453
TCGA-EM-A2CO-01	1.53122	0	0.0921312	0	0.0120385	0	0.169924
TCGA-EM-A2CP-01	3.90887	0.272289	0.391358	0.39058	0.244708	0.244817	0.907605
TCGA-EM-A2CQ-01	4.73306	0.118759	0.0427494	0.307086	0.0918285	0.0586995	0.414924
TCGA-EM-A2CR-01	3.79299	0	0.0266046	0	0	0	0.106604
TCGA-EM-A2CS-06	12.1635	0	0.111963	0.0614543	0.0632225	0.0282917	0.369845
TCGA-EM-A2CS-01	12.6036	0.0573642	0.0641889	0.342316	0.126085	0.1957	0.472518
TCGA-EM-A2CT-01	7.03797	0.127689	0	0.429687	0.120174	0.0722773	0.501639
TCGA-EM-A2CU-01	10.0369	0.121198	0.172862	0.187875	0.0844459	0.125397	0.57314
TCGA-EM-A2OV-01	2.22799	0.0500014	0.0820633	0.179501	0.0527042	0.067171	0.239087
TCGA-EM-A2OW-01	1.26586	0.0170658	0.124447	0.0805533	0.0472889	0.0685181	0.254641
TCGA-EM-A2OX-01	13.3608	0.0309392	0.107494	0.11953	0.143857	0.0828249	0.480097
TCGA-EM-A2OY-01	1.56023	0	0.0637218	0	0.00556728	0	0.0838216
TCGA-EM-A2OZ-01	7.38832	0.132437	0.0693029	0.321567	0.159272	0.103341	0.605908
TCGA-EM-A2P0-01	10.0629	0.126279	0.0349313	0.418393	0.163112	0.153775	0.522961
TCGA-EM-A2P1-06	9.85848	0.339205	0.192812	0.244447	0.2023	0.210712	0.818413
TCGA-EM-A2P1-01	7.99102	0.403661	0.339275	0.293921	0.224353	0.15515	0.861889
TCGA-EM-A2P2-01	12.9714	0.0364586	0.0780835	0.201345	0.087188	0.225781	0.201412
TCGA-EM-A2P3-01	9.31685	0.0736141	0.202726	0.147306	0.139706	0.103407	0.558114
TCGA-EM-A3AI-01	0.566961	0	0.105942	0.0645646	0.0257885	0	0.159987
TCGA-EM-A3AJ-01	1.26574	0.105395	0.202522	0.517038	0.156944	0.156028	0.572827
TCGA-EM-A3AK-01	10.4889	0.0261621	0.153017	0.216227	0.124908	0.151284	0.500055
TCGA-EM-A3AL-01	0.763242	0.094382	0.093578	0.174441	0.0630897	0.0788992	0.279128
TCGA-EM-A3AN-01	9.14219	0.156006	0.0706329	0.222287	0.0945125	0.125327	0.498072
TCGA-EM-A3AO-01	10.1825	0.0414647	0.180329	0.0644145	0.0833243	0	0.396494
TCGA-EM-A3AP-01	5.6683	0.101241	0.0538818	0.252018	0.0853563	0.183848	0.332399
TCGA-EM-A3AQ-01	11.2243	0.0119913	0.0833804	0.152125	0.0643068	0.103015	0.340508
TCGA-EM-A3AR-01	10.5737	0.0519586	0.117825	0.228463	0.0847936	0.117599	0.401046
TCGA-EM-A3FJ-01	9.26088	0.160187	0.0866041	0.163699	0.0786281	0.0825447	0.510105
TCGA-EM-A3FK-01	11.1455	0.172242	0.0678545	0.457838	0.175662	0.190735	0.627071
TCGA-EM-A3FL-01	2.487	0.0744463	0.104611	0.106215	0.0335211	0.0155762	0.251677
TCGA-EM-A3FM-01	8.54333	0.0547245	0.119648	0.00266129	0.0979806	0	0.588592
TCGA-EM-A3FN-01	0.557091	0	0.082583	0	0.00376562	0	0.118275
TCGA-EM-A3FO-01	11.514	0	0.112556	0.097026	0.124035	0	0.409857
TCGA-EM-A3FP-01	5.97491	0.0457483	0.189916	0.0183526	0.0396939	0.0755685	0.307558
TCGA-EM-A3FQ-06	9.19794	0	0.102185	0	0.0240205	0	0.172989
TCGA-EM-A3FQ-01	6.77509	0.353923	0.257546	0	0.161165	0	1.08667
TCGA-EM-A3FR-01	5.4483	0.0524841	0.0884322	0.148795	0.0506998	0.0263959	0.239592
TCGA-EM-A3O3-01	9.51627	0	0.111909	0	0.0887138	0	0.653894
TCGA-EM-A3O6-01	0.713344	0.00102349	0.108755	0.021374	0.018763	0	0.1974
TCGA-EM-A3O7-01	8.04499	0.0525535	0.0658941	0.306286	0.0788645	0.125402	0.438088
TCGA-EM-A3O8-01	12.087	0.0818238	0	0.371188	0.0479153	0.12529	0.291284
TCGA-EM-A3OA-01	5.11642	0.0586716	0.0152835	0.255642	0.0605292	0.0377761	0.293792
TCGA-EM-A3OB-01	11.519	0.0319702	0.0935391	0.0996139	0.0372669	0.0659512	0.18548
TCGA-EM-A3ST-01	11.1007	0	0.105884	0	0.0175226	0	0.171262
TCGA-EM-A3SU-06	10.2672	0.214495	0.541542	0	0.197337	0.169672	0.916687
TCGA-EM-A3SU-01	10.4838	0.11661	0.0880552	0	0.0694001	0.0197634	0.562499
TCGA-EM-A3SX-01	7.20852	0.0624051	0.0522402	0.281305	0.113125	0.105063	0.39075
TCGA-EM-A3SY-01	0.361544	0	0.0959744	0	0.0214226	0	0.180813
TCGA-EM-A3SZ-01	9.34812	0.154539	0.0902944	0.174466	0.152302	0.0764179	0.519667
TCGA-EM-A4FF-01	9.86235	0.0964929	0.138272	0.121267	0.124321	0.0997045	0.512064
TCGA-EM-A4FH-01	1.16459	0.0571083	0.0625874	0.167576	0.0340899	0.0216806	0.225329
TCGA-EM-A4FK-01	3.90427	0.0864922	0	0.453098	0.13271	0.080778	0.479448
TCGA-EM-A4FM-01	6.92419	0.00101568	0.160708	0	0.0789319	0	0.476686
TCGA-EM-A4FN-01	9.16235	0.0386168	0.102775	0	0.0489057	0	0.449026
TCGA-EM-A4FO-01	6.90063	0.324567	0.509766	0	0.1373	0.0495922	0.705421
TCGA-EM-A4FQ-01	9.90068	0	0.148004	0.0194539	0.0854255	0	0.446676
TCGA-EM-A4FR-01	8.24501	0	0.0696864	0	0.0180901	0	0.113642
TCGA-EM-A4FU-01	7.74408	0	0.120139	0.0221247	0.0353393	0.0260019	0.202968
TCGA-EM-A4FV-01	7.90764	0.134334	0.255416	0.126212	0.14543	0.104986	0.615971
TCGA-EM-A4G1-01	7.09104	0.0730297	0.0788267	0.10637	0.0654162	0.0649356	0.317148
TCGA-ET-A25G-01	8.70983	0.0989806	0.0677355	0.228286	0.189972	0	0.670704
TCGA-ET-A25I-01	7.77449	0.000330091	0.156542	0.0135121	0.0136333	0.0045333	0.245278
TCGA-ET-A25J-01	10.5235	0.114158	0.0864167	0.145397	0.0911344	0.0646667	0.478171
TCGA-ET-A25K-01	12.4481	0.0592305	0	0.377614	0.185109	0.0375963	0.570711
TCGA-ET-A25L-01	9.39444	0.0225605	0.195446	0.0389563	0.128745	0.0791318	0.479048
TCGA-ET-A25M-01	9.18137	0.0540252	0.089343	0.256675	0.123182	0.0881953	0.504304
TCGA-ET-A25N-01	12.075	0.0772834	0	0.445412	0.248636	0.179281	0.649778
TCGA-ET-A25O-01	7.29862	0.191479	0.030506	0.264082	0.0706936	0.131636	0.443137
TCGA-ET-A25P-01	10.1608	0.0819621	0.0932766	0.251677	0.069458	0.181349	0.338111
TCGA-ET-A25R-01	8.80146	0.21315	0.14851	0.0529924	0.109372	0.0163991	0.599956
TCGA-ET-A2MX-01	5.42092	0	0.0597945	0.136956	0.0807245	0	0.364832
TCGA-ET-A2MY-01	9.36392	0.0970944	0.0747897	0.149099	0.0779677	0.0454986	0.477578
TCGA-ET-A2MZ-01	11.53	0.117271	0.0646802	0.326452	0.125839	0.135167	0.583359
TCGA-ET-A2N0-01	9.37887	0.0274735	0.0828322	0	0.0177918	0	0.243012
TCGA-ET-A2N3-01	1.47405	0	0.0863865	0.0241182	0.0156846	0	0.101737
TCGA-ET-A2N4-01	10.6913	0.0335286	0.0893137	0.149765	0.0792793	0.0932367	0.341716
TCGA-ET-A2N5-01	9.45926	0.0262297	0.0910603	0.122392	0.0354419	0.0732193	0.222387
TCGA-ET-A39I-01	10.598	0.0441619	0.055703	0.387678	0.0596427	0.177131	0.321258
TCGA-ET-A39J-01	11.711	0.0569236	0.0920721	0.269164	0.143948	0.0902459	0.508239
TCGA-ET-A39K-01	11.1899	0	0.0712548	0.0827014	0.0708586	0	0.378097
TCGA-ET-A39L-01	8.52755	0.084637	0.0834587	0.286175	0.118012	0.144128	0.42764
TCGA-ET-A39M-01	8.19604	0.0658706	0.204431	0	0.0595935	0	0.522392
TCGA-ET-A39N-01	0.685537	0	0.0907314	0.0738475	0.0424805	0	0.236995
TCGA-ET-A39O-01	8.25384	0.043182	0.126356	0.211712	0.201494	0.131514	0.582998
TCGA-ET-A39P-01	6.52538	0.14424	0.0515217	0.192522	0.0924689	0.0377196	0.537792
TCGA-ET-A39R-01	9.52171	0.303308	0.317091	0.0726389	0.16868	0.043157	0.865222
TCGA-ET-A39S-01	10.037	0.0574558	0.0550587	0.235357	0.127106	0.0317316	0.518105
TCGA-ET-A39T-01	7.1047	0.194835	0	0.278262	0.09468	0.0609057	0.535173
TCGA-ET-A3BN-01	10.8673	0.0744033	0	0.472121	0.228126	0.140329	0.62664
TCGA-ET-A3BO-01	9.91353	0.274362	0.178266	0.201151	0.156212	0.119674	0.773925
TCGA-ET-A3BP-01	8.16096	0.0717942	0.0979461	0.141705	0.0801634	0.0665505	0.345322
TCGA-ET-A3BQ-01	11.7617	0.104727	0.0442077	0.291454	0.135045	0.143497	0.552151
TCGA-ET-A3BS-01	9.98539	0.166799	0.14867	0.410088	0.169664	0.237232	0.706061
TCGA-ET-A3BT-01	7.44323	0.0661925	0.0834867	0.219499	0.124015	0.0638189	0.519338
TCGA-ET-A3BU-01	11.1424	0.0611792	0.0752692	0.354451	0.164622	0.181898	0.564458
TCGA-ET-A3BV-01	7.00572	0.0642279	0.380834	0.010469	0.201318	0	0.968821
TCGA-ET-A3BW-01	12.7612	0.0977574	0.081721	0.369579	0.0983934	0.156933	0.470898
TCGA-ET-A3BX-01	8.66741	0.0658464	0.22656	0.208605	0.228432	0.0601599	0.754383
TCGA-ET-A3DO-01	7.3044	0.236536	0.20615	0.129366	0.235514	0.0142994	0.770792
TCGA-ET-A3DP-01	10.5466	0.0472866	0.0532395	0.343687	0.228396	0.169863	0.67591
TCGA-ET-A3DQ-01	9.73542	0.243994	0.269882	0.377436	0.141522	0.159199	0.690011
TCGA-ET-A3DR-01	8.76363	0.0791001	0.0791926	0.351516	0.133152	0.116697	0.517388
TCGA-ET-A3DS-01	0.936214	0.126615	0.0710927	0.298403	0.0836982	0.0895227	0.360508
TCGA-ET-A3DT-01	7.20636	0.265678	0.530648	0.196523	0.240223	0.183623	0.924278
TCGA-ET-A3DU-01	6.75693	0.157372	0.367111	0	0.173895	0	0.690679
TCGA-ET-A3DV-01	2.4775	0.0631792	0.0685314	0.14968	0.0551556	0.0444841	0.205939
TCGA-ET-A3DW-01	8.37774	0.131506	0.0963865	0.154895	0.144492	0.0820698	0.476544
TCGA-ET-A40P-01	9.44456	0	0.0768737	0.0957321	0.0635875	0	0.300841
TCGA-ET-A40Q-01	7.86068	0.280102	0.125266	0.0207426	0.0834446	0.0196079	0.760047
TCGA-ET-A40R-01	9.16883	0.159704	0.133508	0.0465448	0.0701163	0	0.437339
TCGA-ET-A40S-01	11.0896	0.135526	0.228465	0	0.10892	0	0.690683
TCGA-ET-A40T-01	9.62189	0.0784211	0.180274	0.181112	0.137082	0.0855741	0.580646
TCGA-ET-A4KN-01	5.03485	0	0.137429	0	0	0	0.212988
TCGA-ET-A4KQ-01	11.7372	0.0424793	0.0588457	0.281666	0.0596564	0.144606	0.288799
TCGA-FE-A22Z-01	6.25213	0	0.122041	0.0847617	0.143029	0.00803533	0.501219
TCGA-FE-A230-01	8.52964	0.264065	0.156004	0.215084	0.160524	0.0739836	0.709707
TCGA-FE-A231-01	7.32137	0.0521651	0.14226	0.0622601	0.112265	0.232298	0.465694
TCGA-FE-A232-01	8.08418	0.0250623	0.141606	0.149866	0.121815	0.0601164	0.572252
TCGA-FE-A233-01	8.92332	0.11774	0.0664543	0.267743	0.176318	0.0645725	0.589039
TCGA-FE-A234-01	8.50648	0.170372	0.0951337	0.236064	0.21136	0.120202	0.786365
TCGA-FE-A235-01	11.5817	0	0.0589588	0.109735	0.125356	0	0.395805
TCGA-FE-A236-01	9.58475	0.189491	0.0461421	0.318441	0.124876	0.0911692	0.543775
TCGA-FE-A237-01	9.31737	0.0784474	0.135914	0.172554	0.141825	0.0903637	0.587899
TCGA-FE-A238-01	8.17462	0.0816275	0.107714	0.174577	0.146354	0	0.660625
TCGA-FE-A239-01	1.30609	0.0412641	0.100613	0.0319597	0.0214617	0	0.173374
TCGA-FE-A23A-01	7.21019	0.0523865	0.232969	0	0.120168	0	0.389875
TCGA-FE-A3PA-01	8.564	0.00377654	0.143071	0	0.0387754	0	0.27731
TCGA-FE-A3PB-01	6.84221	0.192715	0.174732	0	0.0813628	0	0.608166
TCGA-FE-A3PC-01	8.40905	0	0.0923136	0	0.0482927	0	0.225943
TCGA-FE-A3PD-01	10.9422	0.0445091	0.139762	0.151689	0.112381	0.137513	0.328758
TCGA-FK-A3S3-01	13.1354	0.0612697	0.0832679	0.165138	0.0694422	0.0763543	0.331801
TCGA-FK-A3SB-01	11.1973	0.0869013	0.0299732	0.368713	0.1408	0.148816	0.49879
TCGA-FK-A3SD-01	0.300885	0	0.0724677	0.0761151	0.0147075	0	0.177299
TCGA-FK-A3SE-01	10.2333	0.0328097	0	0.381882	0.208857	0.0204354	0.643221
TCGA-FK-A3SG-01	10.0296	0.000815392	0.0357184	0.170971	0.142259	0	0.399637
TCGA-FK-A3SH-01	13.0758	0	0.141267	0	0.0616401	0	0.252504
TCGA-FK-A4UB-01	8.26933	0	0.109985	0.0232236	0.0459778	0	0.190042
TCGA-FY-A2QD-01	1.13389	0.139089	0	0.402109	0.0630011	0.134993	0.359626
TCGA-FY-A3BL-01	8.34166	0.119034	0.0568889	0.218175	0.0672773	0.0166021	0.42909
TCGA-FY-A3I4-01	9.03735	0	0.160335	0.0824943	0.124258	0.064812	0.628422
TCGA-FY-A3I5-01	4.94347	0	0.20539	0.0487616	0.0685672	0	0.223355
TCGA-FY-A3NM-01	3.0567	0.0780402	0.125547	0.164383	0.046298	0.0686977	0.226752
TCGA-FY-A3NN-01	9.58985	0.112611	0.0433544	0.179104	0.0877639	0.165257	0.516182
TCGA-FY-A3NP-01	10.3801	0.0415897	0.069466	0.307933	0.0548563	0.144271	0.333997
TCGA-FY-A3ON-01	8.91301	0.0868163	0.120231	0.322431	0.168476	0.134198	0.504796
TCGA-FY-A3R6-01	9.75186	0.243406	0.243587	0.277019	0.158322	0.156063	0.708473
TCGA-FY-A3R7-01	9.99637	0.147505	0.126375	0.267154	0.119314	0.128091	0.537659
TCGA-FY-A3R8-01	9.21315	0.0282625	0.114893	0.191298	0.161808	0.0691949	0.724759
TCGA-FY-A3R9-01	6.55974	0.00284704	0.0796179	0.0697898	0.0141895	0.00301118	0.183383
TCGA-FY-A3RA-01	10.6365	0.0762304	0	0.367673	0.1421	0.095432	0.575382
TCGA-FY-A3TY-01	7.09698	0	0.231625	0.0726672	0.180286	0.288961	0.667639
TCGA-FY-A3W9-01	7.98794	0.0525981	0.10132	0.147495	0.0525225	0.0762045	0.217989
TCGA-FY-A3WA-01	2.81071	0.091046	0.0665511	0.306268	0.116926	0.0583801	0.332643
TCGA-FY-A3YR-01	8.80565	0.0715306	0.0786786	0.135078	0.077784	0	0.467512
TCGA-FY-A40K-01	8.15235	0.0757664	0.146581	0.178704	0.140494	0.350508	0.6369
TCGA-FY-A40L-01	9.73664	0.104627	0.115059	0.116875	0.107846	0.0542392	0.567888
TCGA-FY-A40M-01	10.4397	0.028176	0.145879	0.0855894	0.0409164	0.0167694	0.23368
TCGA-FY-A40N-01	11.035	0.0393693	0.110984	0.333268	0.103401	0.124098	0.37483
TCGA-FY-A4B0-01	4.21288	0.00898771	0.0985284	0.134723	0.112418	0.102627	0.363572
TCGA-FY-A4B3-01	8.90993	0	0.0222802	0.350038	0.297489	0.0591834	0.592972
TCGA-FY-A4B4-01	8.40271	0.0423548	0.101783	0.168162	0.188488	0.072811	0.654407
TCGA-FY-A76V-01	11.6887	0.0755448	0.103677	0.284618	0.110917	0.14715	0.572285
TCGA-GE-A2C6-01	11.7618	0.22684	0.1269	0.250835	0.148864	0.138108	0.697954
TCGA-H2-A26U-01	7.97132	0.146719	0.454426	0	0.229464	0.140156	0.969353
TCGA-H2-A2K9-01	10.4482	0.131262	0.144662	0.162666	0.123305	0.351025	0.200572
TCGA-H2-A3RH-01	11.9405	0.0213164	0.093945	0.305298	0.0813321	0.119733	0.393732
TCGA-H2-A3RI-01	7.97105	0.0273736	0.163323	0.171994	0.0863547	0.104091	0.444898
TCGA-H2-A421-01	7.97099	0.0270991	0.238435	0.0290119	0.108972	0.00098167	0.483066
TCGA-H2-A422-01	8.37873	0.0412311	0.0736419	0.279635	0.13968	0.123981	0.416381
TCGA-IM-A3EB-01	11.3115	0.196815	0.1191	0.191923	0.174745	0.0659677	0.716996
TCGA-IM-A3ED-01	9.88094	0.0995353	0.106758	0.41408	0.2212	0.314846	0.728775
TCGA-IM-A3U2-01	7.72891	0.0528354	0.0730648	0.117338	0.0822126	0	0.422615
TCGA-IM-A3U3-01	10.7449	0.153341	0.115531	0.112895	0.091542	0.0439399	0.588378
TCGA-IM-A41Y-01	11.1027	0.0135481	0.0563105	0.171995	0.0729916	0	0.345371
TCGA-IM-A41Z-01	8.54368	0.0937114	0.124396	0.184669	0.0812321	0.146348	0.463605
TCGA-IM-A420-01	7.74519	0.0548213	0.228835	0.134457	0.165521	0.0282619	0.550748
TCGA-IM-A4EB-01	8.66267	0.0129565	0.235583	0.0247385	0.126403	0	0.495549
TCGA-J8-A3NZ-01	9.05252	0.223782	0.0859927	0.259004	0.137271	0.0913771	0.745642
TCGA-J8-A3O0-01	11.9811	0.0460314	0.0895063	0.203365	0.101742	0.10699	0.386949
TCGA-J8-A3O1-01	4.39691	0.141303	0.0858751	0.268393	0.149066	0.117155	0.530735
TCGA-J8-A3O2-06	13.4139	0.0475799	0.0980537	0.21154	0.0751122	0.104951	0.428306
TCGA-J8-A3O2-01	12.5766	0.152221	0.178956	0.24749	0.128174	0.132669	0.583045
TCGA-J8-A3YD-01	8.71463	0.0277104	0.0667816	0.235763	0.0799123	0.0410929	0.367457
TCGA-J8-A3YE-01	10.7621	0.139053	0.0175886	0.22481	0.0713151	0.0456834	0.398899
TCGA-J8-A3YF-01	8.62306	0.0809692	0.208585	0.0611152	0.129105	0.00504709	0.572044
TCGA-J8-A3YG-01	8.49593	0	0.166378	0.11924	0.192071	0.0646841	0.576499
TCGA-J8-A3YH-06	12.9595	0.11891	0.233775	0.0935622	0.0868313	0.122606	0.476784
TCGA-J8-A3YH-01	13.2609	0.0658256	0.0800085	0.179799	0.0812024	0.0882673	0.381962
TCGA-J8-A42S-01	5.19048	0	0.0750726	0.270318	0.123276	0	0.491027
TCGA-J8-A4HW-06	9.33655	0.24685	0.690104	0	0.196056	0.0501397	0.977717
TCGA-J8-A4HW-01	7.73184	0.077983	0.0869468	0.308444	0.120028	0.0975003	0.482415
TCGA-J8-A4HY-01	6.99978	0.0303959	0.117862	0.120169	0.0606572	0.0312065	0.353277
TCGA-KS-A41F-01	7.80162	0	0.0474939	0	0	0	0.100913
TCGA-KS-A41I-01	4.44701	0	0.0219386	0	0	0	0.102224
TCGA-KS-A41J-01	9.24794	0	0.158318	0.00902116	0.0849714	0	0.420109
TCGA-KS-A41L-01	0.423955	0	0.0599396	0	0.000656688	0	0.0541592
TCGA-KS-A4I1-01	11.7529	0	0.150769	0	0.0404237	0	0.204056
TCGA-KS-A4I3-01	8.28468	0.101992	0.064095	0.253408	0.104151	0.0818179	0.41797
TCGA-KS-A4I5-01	10.7451	0.0287275	0.131356	0.016185	0.167246	0	0.317737
TCGA-KS-A4I7-01	10.7915	0.00694106	0.148856	0.126188	0.111442	0.0664224	0.418379
TCGA-KS-A4I9-01	6.40338	0.0428564	0.148311	0.0538833	0.112626	0.0450913	0.545169
TCGA-KS-A4IB-01	9.70178	0.0241371	0.0848111	0.118307	0.0735728	0.090624	0.302163
TCGA-KS-A4IC-01	8.27357	0.098241	0.0721614	0.15626	0.0685989	0.0608713	0.463706
TCGA-KS-A4ID-01	5.42738	0.145268	0.22843	0	0.101816	0.0192829	0.51804
TCGA-L6-A4EP-01	10.8144	0	0.117222	0	0.0518297	0	0.280546
TCGA-L6-A4EQ-01	10.1429	0	0.097918	0.230135	0.0798641	0.0581828	0.416584
TCGA-L6-A4ET-01	8.24881	0.0103717	0.069294	0.207552	0.0584105	0.0509245	0.330427
TCGA-L6-A4EU-01	5.80773	0.0662733	0.159947	0	0.113208	0	0.483372
TCGA-MK-A4N6-01	9.13246	0.0483004	0.110449	0.313758	0.275643	0.158316	0.768259
TCGA-MK-A4N7-01	11.6848	0.080196	0.0449588	0.403788	0.122608	0.176371	0.521046
TCGA-MK-A4N9-01	11.9804	0.0640337	0.0559424	0.296282	0.104078	0.0746451	0.408363
TCGA-MK-A84Z-01	9.22551	0.0298135	0.10253	0.0487279	0.0316846	0.014895	0.220423
TCGA-QD-A8IV-01	9.70118	0.0708812	0.104204	0.173545	0.0666718	0.0645611	0.291287

## Sheet: Tumour dryness
Table S3. PPI network of ZZCH12 and its correlation with immune and tumor stemness and tumor mutational load
TCGA-ET-A2N0-01	0.702598
TCGA-FE-A3PA-01	0.27746
TCGA-EM-A1YC-01	0.811266
TCGA-IM-A420-01	0.458576
TCGA-FY-A76V-01	0.0573846
TCGA-EM-A2CR-01	0.518227
TCGA-EM-A3FO-01	0.36407
TCGA-EL-A3H7-01	0.24565
TCGA-KS-A4I5-01	0.22685
TCGA-MK-A84Z-01	0.311574
TCGA-EM-A4FM-01	0.320529
TCGA-BJ-A190-01	0.637697
TCGA-BJ-A0ZC-01	0.572157
TCGA-EM-A4FO-01	0.31891
TCGA-DJ-A2PO-01	0.420402
TCGA-EL-A3ZT-01	0.238153
TCGA-DJ-A3V9-01	0.162382
TCGA-ET-A3DV-01	0.65057
TCGA-FY-A3NN-01	0.628853
TCGA-DJ-A13O-01	0.490125
TCGA-EM-A1CW-01	0.644034
TCGA-E8-A436-01	0.330643
TCGA-DJ-A1QO-01	0.437873
TCGA-E3-A3E2-01	0.612924
TCGA-E8-A416-01	0.249156
TCGA-EL-A3GV-01	0.314453
TCGA-ET-A2N3-01	0.46802
TCGA-BJ-A2NA-01	0.401731
TCGA-DJ-A4V0-01	0.316659
TCGA-EL-A3CM-01	0.233373
TCGA-EM-A3O3-01	0.6576
TCGA-FY-A3TY-01	0.133601
TCGA-EL-A3T6-01	0.473853
TCGA-ET-A3BO-01	0.40723
TCGA-EM-A2OX-01	0.237781
TCGA-EL-A3D6-01	0.394783
TCGA-J8-A3YF-01	0.403077
TCGA-CE-A481-01	0.159032
TCGA-E8-A419-01	0.482601
TCGA-ET-A25G-01	0.472634
TCGA-E8-A438-01	0.16284
TCGA-E3-A3E0-01	0.451191
TCGA-DE-A0Y3-01	0.478199
TCGA-EM-A3FR-01	0.467871
TCGA-ET-A3DS-01	0.550369
TCGA-DJ-A4UL-01	0.52504
TCGA-EM-A2CK-01	0.474878
TCGA-J8-A3O1-01	0.687578
TCGA-FE-A237-01	0.343353
TCGA-BJ-A3PT-01	0.386447
TCGA-EM-A3O8-01	0.490287
TCGA-H2-A2K9-01	0.346308
TCGA-DJ-A2Q7-01	0.42044
TCGA-EL-A3CT-01	0.299305
TCGA-DJ-A1QM-01	0.181557
TCGA-H2-A3RH-01	0.315421
TCGA-IM-A41Z-01	0.698317
TCGA-EM-A22O-01	0.722983
TCGA-DJ-A4UR-01	0.203537
TCGA-IM-A3EB-01	0.570354
TCGA-EL-A3ZN-01	0.105437
TCGA-FK-A3SH-01	0.381601
TCGA-EL-A3ZS-01	0.201872
TCGA-EL-A3GR-01	0.0599369
TCGA-DE-A3KN-01	0.10749
TCGA-EM-A3AI-01	0.48142
TCGA-ET-A39R-01	0.437904
TCGA-DJ-A13X-01	0.34789
TCGA-ET-A25O-01	0.629895
TCGA-EM-A1YD-01	0.206242
TCGA-FE-A22Z-01	0.356254
TCGA-BJ-A2N8-01	0.565281
TCGA-DJ-A13W-01	0.354216
TCGA-EL-A3N2-01	0.387299
TCGA-EM-A4FF-01	0.37221
TCGA-EL-A3CU-01	0.370587
TCGA-J8-A3YD-01	0.425277
TCGA-FY-A3YR-01	0.391578
TCGA-DJ-A2PV-01	0.123666
TCGA-KS-A4I3-01	0.447136
TCGA-EM-A1CV-01	0.48416
TCGA-BJ-A3PR-01	0.669329
TCGA-EM-A3O6-01	0.581731
TCGA-BJ-A45J-01	0.260258
TCGA-BJ-A28V-01	0.401794
TCGA-EM-A3FP-01	0.483371
TCGA-EM-A3SY-01	1
TCGA-FK-A3S3-01	0.298944
TCGA-FY-A3NP-01	0.589413
TCGA-E8-A242-01	0.3361
TCGA-FY-A3BL-01	0.546745
TCGA-EL-A3CR-01	0.174143
TCGA-DJ-A13P-01	0.377076
TCGA-FE-A239-01	0.525837
TCGA-DE-A69K-01	0.322142
TCGA-E8-A418-01	0.730261
TCGA-EL-A3D0-01	0.266126
TCGA-EL-A3D4-01	0.16502
TCGA-MK-A4N6-01	0.325096
TCGA-E8-A437-01	0.280343
TCGA-EM-A3FL-01	0.784778
TCGA-J8-A3YH-01	0.363186
TCGA-E8-A433-01	0.388633
TCGA-EL-A4K9-01	0.265197
TCGA-E8-A2EA-01	0.455346
TCGA-ET-A3BU-01	0.261541
TCGA-EL-A4K0-01	0.116644
TCGA-EM-A2CM-01	0.6898
TCGA-EL-A4K1-01	0.363707
TCGA-EL-A3CL-01	0.2995
TCGA-DJ-A2PR-01	0.375767
TCGA-DJ-A2QA-01	0.502335
TCGA-DJ-A3VJ-01	0.265703
TCGA-ET-A3DO-01	0.479815
TCGA-EM-A2CN-01	0.468923
TCGA-DJ-A3UV-01	0.164309
TCGA-J8-A3O2-06	0.454532
TCGA-IM-A4EB-01	0.285241
TCGA-EM-A3OA-01	0.735958
TCGA-EL-A3MW-01	0.468746
TCGA-FE-A234-01	0.418712
TCGA-EM-A2CQ-01	0.505588
TCGA-FY-A40K-01	0.259969
TCGA-ET-A40P-01	0.341345
TCGA-DJ-A1QF-01	0.370261
TCGA-EL-A4KH-01	0.43945
TCGA-ET-A3BV-01	0.0327115
TCGA-CE-A27D-01	0.482383
TCGA-EL-A4KI-01	0.586655
TCGA-KS-A4I7-01	0.30101
TCGA-EM-A3SZ-01	0.571776
TCGA-DJ-A3VB-01	0.470353
TCGA-DJ-A2PP-01	0.640106
TCGA-DJ-A4V4-01	0.385209
TCGA-EL-A4KG-01	0.466292
TCGA-FE-A3PD-01	0.38535
TCGA-ET-A40R-01	0.368082
TCGA-EM-A4FK-01	0.679726
TCGA-DJ-A2PU-01	0.358027
TCGA-J8-A3YG-01	0.304099
TCGA-BJ-A2N9-01	0.901014
TCGA-EM-A22Q-01	0.601348
TCGA-FE-A23A-01	0.428071
TCGA-EL-A3T2-01	0.381158
TCGA-ET-A39K-01	0.446285
TCGA-H2-A26U-01	0.257835
TCGA-EM-A3AO-01	0.377379
TCGA-BJ-A45H-01	0.314926
TCGA-J8-A3O0-01	0.35828
TCGA-EM-A2P2-01	0.356564
TCGA-IM-A3ED-01	0.323142
TCGA-BJ-A18Y-01	0.32173
TCGA-ET-A40S-01	0.481588
TCGA-EL-A4K7-01	0.570335
TCGA-EL-A3GZ-01	0.346995
TCGA-BJ-A0ZJ-01	0.440671
TCGA-BJ-A0ZF-01	0.515086
TCGA-FE-A232-01	0.390597
TCGA-DJ-A3V4-01	0.412842
TCGA-DJ-A3UP-01	0.417475
TCGA-DJ-A1QN-01	0.359512
TCGA-EM-A3AJ-01	0.448533
TCGA-EM-A1YA-01	0.76181
TCGA-FY-A3R8-01	0.459942
TCGA-BJ-A45K-01	0.17208
TCGA-DJ-A3V2-01	0.490157
TCGA-J8-A3O2-01	0.29722
TCGA-ET-A3BN-01	0.271136
TCGA-DJ-A3UU-01	0.250203
TCGA-DJ-A3UQ-01	0.254829
TCGA-DJ-A3V3-01	0.309189
TCGA-FY-A3R9-01	0.60356
TCGA-KS-A41J-01	0.659485
TCGA-EL-A4K2-01	0.337973
TCGA-FY-A3WA-01	0.416751
TCGA-DJ-A13S-01	0.620962
TCGA-EM-A2P1-06	0.529476
TCGA-DJ-A3US-01	0.405303
TCGA-ET-A2N4-01	0.447894
TCGA-ET-A39N-01	0.664466
TCGA-EM-A4FV-01	0.415461
TCGA-BJ-A0ZA-01	0.546145
TCGA-BJ-A0Z0-01	0.5795
TCGA-DJ-A4V5-01	0.250715
TCGA-EL-A3H5-01	0.0999224
TCGA-EL-A3T9-01	0.244528
TCGA-J8-A42S-01	0.147873
TCGA-EM-A3FM-01	0.504891
TCGA-ET-A40T-01	0.181616
TCGA-J8-A4HW-01	0.280114
TCGA-ET-A25J-01	0.535834
TCGA-BJ-A28R-01	0.416913
TCGA-BJ-A3F0-01	0.485967
TCGA-EL-A3H2-01	0.654322
TCGA-E3-A3E1-01	0.533054
TCGA-FK-A4UB-01	0.212592
TCGA-QD-A8IV-01	0.43509
TCGA-DJ-A2QC-01	0.46722
TCGA-EL-A3CN-01	0.425722
TCGA-DJ-A3UM-01	0.288454
TCGA-BJ-A291-01	0.42274
TCGA-EL-A3GY-01	0.377376
TCGA-DJ-A2PW-01	0.358233
TCGA-EM-A2CS-01	0.256216
TCGA-EL-A3ZM-01	0.524113
TCGA-E8-A417-01	0.540211
TCGA-EL-A3MZ-01	0.352003
TCGA-FE-A235-01	0.235117
TCGA-CE-A483-01	0.506253
TCGA-BJ-A45C-01	0.335172
TCGA-KS-A41F-01	0.699293
TCGA-DJ-A3V0-01	0.251526
TCGA-ET-A39S-01	0.269666
TCGA-EL-A3TB-01	0.421478
TCGA-E8-A432-01	0.297661
TCGA-ET-A3BT-01	0.491397
TCGA-DJ-A3VL-01	0.383444
TCGA-ET-A25K-01	0.165637
TCGA-ET-A3BS-01	0.564064
TCGA-BJ-A45G-01	0.363558
TCGA-H2-A421-01	0.353367
TCGA-DE-A0XZ-01	0.328345
TCGA-BJ-A45I-01	0.37032
TCGA-KS-A41I-01	0.349122
TCGA-DJ-A2PZ-01	0.458609
TCGA-DJ-A3V7-01	0.515335
TCGA-EL-A3GO-01	0.463096
TCGA-EM-A2CL-01	0.532128
TCGA-MK-A4N7-01	0.324879
TCGA-DJ-A2Q4-01	0.390189
TCGA-EL-A3T7-01	0.291844
TCGA-DJ-A3UR-01	0.408849
TCGA-CE-A13K-01	0.166854
TCGA-J8-A4HY-01	0.592837
TCGA-DJ-A3V5-01	0.332232
TCGA-DJ-A1QQ-01	0.225348
TCGA-EL-A3H3-01	0.696715
TCGA-DJ-A4UP-01	0.245661
TCGA-DE-A7U5-01	0.15502
TCGA-EL-A4K6-01	0.491454
TCGA-EL-A3MY-01	0.168135
TCGA-DJ-A3VA-01	0.403891
TCGA-DJ-A4UT-01	0.162004
TCGA-ET-A25I-01	0.603051
TCGA-BJ-A45E-01	0.591601
TCGA-E8-A3X7-01	0.450061
TCGA-DJ-A1QH-01	0.429692
TCGA-BJ-A0ZB-01	0.517022
TCGA-BJ-A3PU-01	0.675189
TCGA-EM-A2CT-01	0.678341
TCGA-BJ-A192-01	0.620779
TCGA-E8-A414-01	0.12151
TCGA-FY-A3ON-01	0.263781
TCGA-BJ-A28W-01	0.912804
TCGA-EL-A3CX-01	0.606026
TCGA-DJ-A4V2-01	0.34734
TCGA-ET-A39M-01	0.448878
TCGA-DJ-A3VM-01	0.585801
TCGA-BJ-A28S-01	0.405256
TCGA-FK-A3SB-01	0.22618
TCGA-H2-A422-01	0.430731
TCGA-DJ-A3UT-01	0.438279
TCGA-BJ-A0Z5-01	0.595033
TCGA-EM-A4FN-01	0.53691
TCGA-BJ-A4O9-01	0.71578
TCGA-FK-A3SD-01	0.553939
TCGA-FY-A40L-01	0.412101
TCGA-ET-A3DW-01	0.612419
TCGA-FY-A4B0-01	0.493521
TCGA-ET-A2MZ-01	0.40988
TCGA-E8-A2JQ-01	0.439159
TCGA-DJ-A3VF-01	0.166683
TCGA-ET-A39L-01	0.327227
TCGA-EM-A3AP-01	0.313112
TCGA-MK-A4N9-01	0.247644
TCGA-EM-A22I-01	0.337766
TCGA-DJ-A2PN-01	0.30722
TCGA-E3-A3DY-01	0.515963
TCGA-DJ-A3VD-01	0.252202
TCGA-DJ-A2Q3-01	0.390885
TCGA-ET-A3DP-01	0.189297
TCGA-L6-A4EU-01	0.371625
TCGA-EL-A4JW-01	0.312626
TCGA-E8-A415-01	0.402289
TCGA-BJ-A3EZ-01	0.571226
TCGA-ET-A3DU-01	0.423703
TCGA-DJ-A3UZ-01	0.313415
TCGA-FK-A3SE-01	0.312402
TCGA-DJ-A2PY-01	0.389768
TCGA-DE-A69J-01	0.465438
TCGA-EL-A3GP-01	0.266753
TCGA-DJ-A3UO-01	0.364
TCGA-EL-A4K4-01	0.174473
TCGA-ET-A39I-01	0.47977
TCGA-DE-A4MB-01	0.278947
TCGA-EL-A3CZ-01	0.446671
TCGA-DJ-A1QG-01	0.640894
TCGA-GE-A2C6-01	0.207651
TCGA-DJ-A3UN-01	0.415852
TCGA-BJ-A0YZ-01	0.422393
TCGA-EL-A3ZP-01	0.204636
TCGA-J8-A3YE-01	0.679751
TCGA-DJ-A13T-01	0.355158
TCGA-EM-A3FQ-01	0.387796
TCGA-DE-A4MD-06	0.436515
TCGA-EL-A3CP-01	0.279011
TCGA-DJ-A3UY-01	0.279825
TCGA-EM-A3O7-01	0.44103
TCGA-FE-A230-01	0.495082
TCGA-EL-A3H1-01	0.426265
TCGA-IM-A3U2-01	0.396581
TCGA-DJ-A2PS-01	0.367264
TCGA-EM-A2CU-01	0.195025
TCGA-EM-A1CU-01	0.284485
TCGA-ET-A4KN-01	0.606041
TCGA-ET-A40Q-01	0.443224
TCGA-EL-A3ZH-01	0.361469
TCGA-ET-A3BQ-01	0.251775
TCGA-FY-A3R7-01	0.264249
TCGA-ET-A3BX-01	0.529953
TCGA-DJ-A2Q2-01	0.524673
TCGA-DJ-A1QE-01	0.381588
TCGA-EL-A3ZL-01	0.126566
TCGA-EM-A2CS-06	0.367174
TCGA-DJ-A13U-01	0.5345
TCGA-DJ-A2Q5-01	0.489724
TCGA-EL-A4JZ-01	0.157283
TCGA-EM-A22N-01	0.66353
TCGA-BJ-A2N7-01	0.505125
TCGA-J8-A4HW-06	0.275395
TCGA-DJ-A1QD-01	0.387785
TCGA-BJ-A0ZE-01	0.807374
TCGA-EM-A4FH-01	0.516267
TCGA-BJ-A45D-01	0.45243
TCGA-ET-A2MX-01	0.646468
TCGA-EL-A3CW-01	0.454737
TCGA-EM-A3AN-01	0.400063
TCGA-CE-A482-01	0.192373
TCGA-BJ-A0ZH-01	0.489166
TCGA-EM-A3ST-01	0.646222
TCGA-BJ-A290-01	0.531147
TCGA-FY-A3I5-01	0.44947
TCGA-FY-A4B4-01	0.282516
TCGA-FY-A4B3-01	0.0345742
TCGA-FY-A3RA-01	0.448676
TCGA-DJ-A2QB-01	0.644542
TCGA-ET-A39P-01	0.46847
TCGA-DE-A0Y2-01	0.331515
TCGA-BJ-A0ZG-01	0.430828
TCGA-DJ-A2PQ-01	0.457476
TCGA-EL-A3ZR-01	0.461874
TCGA-DJ-A3VG-01	0.280846
TCGA-E8-A434-01	0.447944
TCGA-DJ-A2Q6-01	0.253551
TCGA-DJ-A2Q1-01	0.445515
TCGA-DJ-A13R-01	0.725184
TCGA-EM-A2P3-01	0.251803
TCGA-BJ-A28T-01	0.449328
TCGA-ET-A39O-01	0.493039
TCGA-EL-A3T1-01	0.373714
TCGA-EL-A3CO-01	0.112291
TCGA-E8-A44M-01	0.404864
TCGA-EM-A1CS-01	0.324872
TCGA-CE-A485-01	0
TCGA-BJ-A0Z3-01	0.505802
TCGA-EL-A3ZK-01	0.29047
TCGA-EM-A3FJ-01	0.392683
TCGA-DJ-A4UQ-01	0.158766
TCGA-E8-A44K-01	0.405525
TCGA-KS-A4IC-01	0.457649
TCGA-EM-A1YB-01	0.925726
TCGA-EL-A3H8-01	0.352774
TCGA-BJ-A191-01	0.490737
TCGA-FY-A2QD-01	0.557751
TCGA-DJ-A2PT-01	0.435364
TCGA-FY-A40M-01	0.388608
TCGA-EM-A2OZ-01	0.577774
TCGA-BJ-A28X-01	0.359399
TCGA-EL-A3GW-01	0.548162
TCGA-BJ-A0Z2-01	0.538362
TCGA-EM-A3FQ-06	0.359635
TCGA-IM-A41Y-01	0.434561
TCGA-DJ-A13L-01	0.38843
TCGA-DO-A1JZ-01	0.292186
TCGA-ET-A25L-01	0.247186
TCGA-EL-A3MX-01	0.385123
TCGA-FY-A3W9-01	0.425313
TCGA-ET-A2MY-01	0.615674
TCGA-EL-A3T8-01	0.211991
TCGA-ET-A25R-01	0.439219
TCGA-DJ-A1QL-01	0.401906
TCGA-L6-A4ET-01	0.406682
TCGA-ET-A25P-01	0.443332
TCGA-E3-A3E5-01	0.350874
TCGA-EM-A3FK-01	0.38405
TCGA-EL-A3GU-01	0.136523
TCGA-H2-A3RI-01	0.511658
TCGA-DJ-A3V8-01	0.444642
TCGA-EM-A3SU-06	0.453813
TCGA-DJ-A2Q9-01	0.249802
TCGA-EL-A3CV-01	0.316721
TCGA-BJ-A45F-01	0.477621
TCGA-KS-A41L-01	0.511106
TCGA-J8-A3NZ-01	0.505913
TCGA-DO-A1K0-01	0.398049
TCGA-E3-A3DZ-01	0.494548
TCGA-EM-A3SX-01	0.29469
TCGA-DJ-A3VI-01	0.539932
TCGA-ET-A39J-01	0.26391
TCGA-DJ-A1QI-01	0.364993
TCGA-EL-A3N3-01	0.345571
TCGA-L6-A4EP-01	0.373205
TCGA-DJ-A13V-01	0.380244
TCGA-DE-A2OL-01	0.387231
TCGA-FY-A3I4-01	0.0585403
TCGA-EM-A4FQ-01	0.408952
TCGA-EM-A2P1-01	0.560802
TCGA-EM-A2OV-01	0.731331
TCGA-EL-A3GQ-01	0.22024
TCGA-EL-A4JV-01	0.329165
TCGA-EL-A3T3-01	0.25108
TCGA-CE-A3ME-01	0.544345
TCGA-DJ-A3VK-01	0.361739
TCGA-EL-A3D1-01	0.353768
TCGA-BJ-A0Z9-01	0.589279
TCGA-E3-A3E3-01	0.554153
TCGA-KS-A4ID-01	0.532494
TCGA-FY-A40N-01	0.373571
TCGA-BJ-A18Z-01	0.197694
TCGA-EL-A3ZO-01	0.393635
TCGA-FE-A233-01	0.481305
TCGA-DJ-A4UW-01	0.0818146
TCGA-DE-A4M8-01	0.310814
TCGA-EM-A3AL-01	0.387352
TCGA-J8-A3YH-06	0.347487
TCGA-FE-A236-01	0.503373
TCGA-4C-A93U-01	0.192637
TCGA-BJ-A28Z-01	0.355299
TCGA-EM-A3AK-01	0.292462
TCGA-EL-A3CS-01	0.518076
TCGA-FY-A3R6-01	0.327545
TCGA-KS-A4I9-01	0.422845
TCGA-EM-A2CJ-01	0.447052
TCGA-CE-A484-01	0.266709
TCGA-ET-A25M-01	0.28554
TCGA-DO-A2HM-01	0.470964
TCGA-DJ-A13M-01	0.649403
TCGA-ET-A3BP-01	0.498169
TCGA-EL-A3TA-01	0.258628
TCGA-EM-A22J-01	0.635276
TCGA-IM-A3U3-01	0.482629
TCGA-EM-A2CP-01	0.667913
TCGA-EM-A22L-01	0.54754
TCGA-DE-A4M9-01	0.306694
TCGA-DJ-A3UK-01	0.295217
TCGA-DE-A4MC-01	0.50152
TCGA-EL-A3T0-01	0.0729321
TCGA-ET-A3BW-01	0.455464
TCGA-EL-A3ZQ-01	0.612236
TCGA-E8-A413-01	0.118403
TCGA-DJ-A3V6-01	0.386543
TCGA-EM-A22P-01	0.189257
TCGA-FK-A3SG-01	0.269084
TCGA-DJ-A2Q0-01	0.861309
TCGA-BJ-A4O8-01	0.187237
TCGA-EM-A22M-01	0.4408
TCGA-DE-A4MA-01	0.607642
TCGA-DE-A4MD-01	0.694495
TCGA-EL-A3CY-01	0.228512
TCGA-FE-A3PB-01	0.217497
TCGA-EM-A3AR-01	0.304009
TCGA-EM-A3OB-01	0.456115
TCGA-DJ-A3UX-01	0.378899
TCGA-KS-A4I1-01	0.510794
TCGA-EL-A3ZG-01	0.551439
TCGA-ET-A2N5-01	0.479457
TCGA-ET-A3DT-01	0.458486
TCGA-EL-A3GX-01	0.602449
TCGA-EM-A2OW-01	0.529387
TCGA-EM-A2CO-01	0.69926
TCGA-EM-A22K-01	0.334755
TCGA-DJ-A3VE-01	0.226692
TCGA-BJ-A2P4-01	0.39164
TCGA-EM-A4FU-01	0.358924
TCGA-FE-A3PC-01	0.315192
TCGA-EM-A3SU-01	0.652917
TCGA-EM-A4G1-01	0.546259
TCGA-KS-A4IB-01	0.625092
TCGA-ET-A3DR-01	0.282307
TCGA-EM-A2OY-01	0.966091
TCGA-ET-A39T-01	0.678539
TCGA-EM-A1YE-01	0.504362
TCGA-ET-A25N-01	0.209209
TCGA-CE-A3MD-01	0.314137
TCGA-L6-A4EQ-01	0.417412
TCGA-EM-A3FN-01	0.557826
TCGA-FY-A3NM-01	0.563451
TCGA-DJ-A2PX-01	0.361199
TCGA-EM-A2P0-01	0.320726
TCGA-EL-A3GS-01	0.510456
TCGA-EM-A1CT-01	0.447194
TCGA-EM-A4FR-01	0.327591
TCGA-EL-A4KD-01	0.072465
TCGA-ET-A4KQ-01	0.267535
TCGA-FE-A231-01	0.782662
TCGA-EL-A3H4-01	0.359162
TCGA-FE-A238-01	0.554592
TCGA-DJ-A3UW-01	0.392785
TCGA-EM-A3AQ-01	0.305806
TCGA-EL-A4JX-01	0.467287
TCGA-EL-A3D5-01	0.668522
TCGA-ET-A3DQ-01	0.214143

## Sheet: TMB
Table S4. PPI network of ZZCH12 and its correlation with immune and tumor stemness and tumor mutational load
Samlpe	TMB_score	Genes
TCGA-ET-A2N0-01	0.31103	9.37887
TCGA-FE-A3PA-01	0.0783164	8.564
TCGA-EM-A1YC-01	0.239079	1.54656
TCGA-IM-A420-01	0.171272	7.74519
TCGA-FY-A76V-01	0.269431	11.6887
TCGA-EM-A2CR-01	0.298269	3.79299
TCGA-EM-A3FO-01	0.199292	11.514
TCGA-EL-A3H7-01	0.5293	8.26302
TCGA-KS-A4I5-01	0.342108	10.7451
TCGA-MK-A84Z-01	0.588472	9.22551
TCGA-EM-A4FM-01	0.648921	6.92419
TCGA-BJ-A0ZC-01	0.120327	0.227987
TCGA-EM-A4FO-01	0.472741	6.90063
TCGA-DJ-A2PO-01	0.193005	9.21093
TCGA-EL-A3ZT-01	0.33684	9.41724
TCGA-DJ-A3V9-01	0.198638	12.9953
TCGA-ET-A3DV-01	0.29961	2.4775
TCGA-FY-A3NN-01	0.239536	9.58985
TCGA-DJ-A13O-01	0.155213	6.96863
TCGA-EM-A1CW-01	0.304483	3.80019
TCGA-E8-A436-01	0.36578	7.45397
TCGA-DJ-A1QO-01	0.476116	5.72265
TCGA-E3-A3E2-01	0.0826507	11.5314
TCGA-E8-A416-01	0	1.42637
TCGA-EL-A3GV-01	0.541622	9.55002
TCGA-ET-A2N3-01	0.302067	1.47405
TCGA-BJ-A2NA-01	0.769238	8.1378
TCGA-DJ-A4V0-01	0.163544	8.28274
TCGA-EL-A3CM-01	0.321786	7.99492
TCGA-EM-A3O3-01	0.882132	9.51627
TCGA-FY-A3TY-01	0.166641	7.09698
TCGA-EL-A3T6-01	0.240805	8.20264
TCGA-ET-A3BO-01	0.269148	9.91353
TCGA-EM-A2OX-01	0.203289	13.3608
TCGA-EL-A3D6-01	0.652939	8.52215
TCGA-J8-A3YF-01	0.694579	8.62306
TCGA-CE-A481-01	0.394684	9.76878
TCGA-E8-A419-01	0.228486	8.2938
TCGA-ET-A25G-01	0.337898	8.70983
TCGA-E8-A438-01	0.201438	9.76081
TCGA-E3-A3E0-01	0.232166	11.9698
TCGA-DE-A0Y3-01	0.390159	9.4122
TCGA-EM-A3FR-01	0.522196	5.4483
TCGA-ET-A3DS-01	0.241094	0.936214
TCGA-DJ-A4UL-01	0.239359	8.39051
TCGA-EM-A2CK-01	0.263576	10.17
TCGA-J8-A3O1-01	0.38751	4.39691
TCGA-FE-A237-01	0.199473	9.31737
TCGA-BJ-A3PT-01	0.400011	7.7941
TCGA-EM-A3O8-01	0.122144	12.087
TCGA-H2-A2K9-01	0.442363	10.4482
TCGA-DJ-A2Q7-01	0.268432	8.88339
TCGA-EL-A3CT-01	1.42451	9.95687
TCGA-DJ-A1QM-01	0.311793	6.68309
TCGA-H2-A3RH-01	0.270753	11.9405
TCGA-IM-A41Z-01	0	8.54368
TCGA-EM-A22O-01	0.822551	8.57461
TCGA-DJ-A4UR-01	0.344141	4.6848
TCGA-IM-A3EB-01	0.266531	11.3115
TCGA-EL-A3ZN-01	0	11.6305
TCGA-FK-A3SH-01	0.37008	13.0758
TCGA-EL-A3ZS-01	0.200889	9.96843
TCGA-EL-A3GR-01	0.363271	10.7943
TCGA-DE-A3KN-01	0.304652	9.67154
TCGA-EM-A3AI-01	0.430893	0.566961
TCGA-ET-A39R-01	0.167591	9.52171
TCGA-DJ-A13X-01	0.263959	9.86827
TCGA-ET-A25O-01	0.271762	7.29862
TCGA-EM-A1YD-01	0.165002	2.31996
TCGA-FE-A22Z-01	0.516754	6.25213
TCGA-BJ-A2N8-01	0.270843	11.6364
TCGA-DJ-A13W-01	0.358938	0.24306
TCGA-EL-A3N2-01	0.306128	9.39456
TCGA-EM-A4FF-01	0.341278	9.86235
TCGA-EL-A3CU-01	0.538553	8.54573
TCGA-J8-A3YD-01	0.243127	8.71463
TCGA-FY-A3YR-01	0.462218	8.80565
TCGA-DJ-A2PV-01	0.315466	9.31728
TCGA-KS-A4I3-01	0.28197	8.28468
TCGA-EM-A1CV-01	0.278848	11.0405
TCGA-BJ-A3PR-01	0.195801	6.11482
TCGA-EM-A3O6-01	0.302782	0.713344
TCGA-BJ-A45J-01	0.351793	9.92695
TCGA-BJ-A28V-01	0.68006	0.388245
TCGA-EM-A3FP-01	0.457751	5.97491
TCGA-EM-A3SY-01	0.389579	0.361544
TCGA-FK-A3S3-01	0.196893	13.1354
TCGA-FY-A3NP-01	0.30243	10.3801
TCGA-E8-A242-01	0.402784	8.83584
TCGA-FY-A3BL-01	0.210008	8.34166
TCGA-EL-A3CR-01	0.770104	7.9204
TCGA-DJ-A13P-01	0.224556	8.42506
TCGA-DE-A69K-01	0.411734	10.0858
TCGA-E8-A418-01	0.826001	7.61051
TCGA-EL-A3D4-01	0.199402	12.0227
TCGA-MK-A4N6-01	0.314291	9.13246
TCGA-E8-A437-01	0.413707	5.96058
TCGA-EM-A3FL-01	0.236941	2.487
TCGA-J8-A3YH-01	0.253559	13.2609
TCGA-E8-A433-01	0.365032	8.60103
TCGA-EL-A4K9-01	0.497388	11.7157
TCGA-E8-A2EA-01	0.337193	8.42823
TCGA-ET-A3BU-01	0.126177	11.1424
TCGA-EL-A4K0-01	0.377316	9.61111
TCGA-EM-A2CM-01	0.683869	4.28421
TCGA-EL-A4K1-01	0.239003	5.19892
TCGA-EL-A3CL-01	0.239027	10.5137
TCGA-DJ-A2PR-01	0.274244	12.4897
TCGA-DJ-A2QA-01	0.338009	8.43064
TCGA-DJ-A3VJ-01	0.227374	10.4883
TCGA-ET-A3DO-01	0.481335	7.3044
TCGA-EM-A2CN-01	0.560086	9.26867
TCGA-J8-A3O2-06	0	13.4139
TCGA-IM-A4EB-01	0.442874	8.66267
TCGA-EM-A3OA-01	0.305104	5.11642
TCGA-EL-A3MW-01	0.271216	8.6969
TCGA-FE-A234-01	0.164937	8.50648
TCGA-EM-A2CQ-01	0.193135	4.73306
TCGA-FY-A40K-01	0.19644	8.15235
TCGA-ET-A40P-01	0.342112	9.44456
TCGA-DJ-A1QF-01	0.163042	9.36725
TCGA-EL-A4KH-01	0.125271	10.0695
TCGA-ET-A3BV-01	0.665444	7.00572
TCGA-CE-A27D-01	0.162869	8.72214
TCGA-EL-A4KI-01	0.637959	11.3403
TCGA-KS-A4I7-01	0.166937	10.7915
TCGA-EM-A3SZ-01	0.577033	9.34812
TCGA-DJ-A3VB-01	0.32739	9.38498
TCGA-DJ-A2PP-01	0.465902	6.10585
TCGA-DJ-A4V4-01	0.567587	9.25041
TCGA-EL-A4KG-01	0.889807	6.55359
TCGA-FE-A3PD-01	0.231732	10.9422
TCGA-ET-A40R-01	0	9.16883
TCGA-EM-A4FK-01	0.204773	3.90427
TCGA-DJ-A2PU-01	0.313021	10.4387
TCGA-J8-A3YG-01	0.253077	8.49593
TCGA-BJ-A2N9-01	0.271179	0.461424
TCGA-EM-A22Q-01	0.30823	3.61306
TCGA-FE-A23A-01	0.275105	7.21019
TCGA-EL-A3T2-01	0.474728	10.2455
TCGA-ET-A39K-01	0.237954	11.1899
TCGA-H2-A26U-01	0.229242	7.97132
TCGA-EM-A3AO-01	0.264508	10.1825
TCGA-BJ-A45H-01	0.341008	11.0393
TCGA-J8-A3O0-01	0.403643	11.9811
TCGA-EM-A2P2-01	0.574204	12.9714
TCGA-IM-A3ED-01	0.196587	9.88094
TCGA-BJ-A18Y-01	0.201828	9.69953
TCGA-ET-A40S-01	0.424297	11.0896
TCGA-EL-A4K7-01	1.06258	8.60232
TCGA-EL-A3GZ-01	0.231743	13.7087
TCGA-BJ-A0ZJ-01	0.0403758	8.94355
TCGA-BJ-A0ZF-01	0.590109	0.585059
TCGA-FE-A232-01	0.307559	8.08418
TCGA-DJ-A3V4-01	0.37782	9.78742
TCGA-DJ-A3UP-01	0.232154	12.7377
TCGA-DJ-A1QN-01	0.200382	10.7678
TCGA-EM-A3AJ-01	0.160625	1.26574
TCGA-EM-A1YA-01	0.276641	0.385155
TCGA-FY-A3R8-01	0.39527	9.21315
TCGA-BJ-A45K-01	0.21398	0.691981
TCGA-DJ-A3V2-01	0.0452998	8.87339
TCGA-J8-A3O2-01	0.344918	12.5766
TCGA-ET-A3BN-01	0.204833	10.8673
TCGA-DJ-A3UU-01	0.159124	11.3853
TCGA-DJ-A3UQ-01	0.304431	9.31264
TCGA-DJ-A3V3-01	0.213491	8.85605
TCGA-FY-A3R9-01	0.522614	6.55974
TCGA-KS-A41J-01	0.230065	9.24794
TCGA-EL-A4K2-01	0.343081	7.70074
TCGA-FY-A3WA-01	0.200308	2.81071
TCGA-DJ-A13S-01	0.420069	8.67667
TCGA-EM-A2P1-06	0	9.85848
TCGA-DJ-A3US-01	0.235777	8.77085
TCGA-ET-A2N4-01	0.484237	10.6913
TCGA-ET-A39N-01	0.282028	0.685537
TCGA-EM-A4FV-01	0.711016	7.90764
TCGA-BJ-A0ZA-01	0.294592	8.81149
TCGA-BJ-A0Z0-01	0.795686	9.17867
TCGA-DJ-A4V5-01	0.162937	9.59658
TCGA-EL-A3H5-01	0.547042	3.97801
TCGA-EL-A3T9-01	0.586084	6.06776
TCGA-J8-A42S-01	0.402707	5.19048
TCGA-EM-A3FM-01	0.459582	8.54333
TCGA-ET-A40T-01	0.2468	9.62189
TCGA-J8-A4HW-01	0.316807	7.73184
TCGA-ET-A25J-01	0.270819	10.5235
TCGA-BJ-A28R-01	0.195246	10.3016
TCGA-BJ-A3F0-01	0.376524	0.949273
TCGA-EL-A3H2-01	0.200474	1.1903
TCGA-E3-A3E1-01	0.409243	9.86786
TCGA-FK-A4UB-01	0.128189	8.26933
TCGA-QD-A8IV-01	0.266784	9.70118
TCGA-DJ-A2QC-01	0.198045	10.0273
TCGA-EL-A3CN-01	0.45937	6.68131
TCGA-DJ-A3UM-01	0.123309	9.74487
TCGA-EL-A3GY-01	0.391415	8.76724
TCGA-DJ-A2PW-01	0.514823	8.94049
TCGA-EM-A2CS-01	0.34164	12.6036
TCGA-EL-A3ZM-01	0	7.56763
TCGA-E8-A417-01	0.736101	6.01802
TCGA-EL-A3MZ-01	0.631602	10.1563
TCGA-FE-A235-01	0.40433	11.5817
TCGA-CE-A483-01	0.166709	8.93925
TCGA-KS-A41F-01	0.305444	7.80162
TCGA-DJ-A3V0-01	0.563104	6.7749
TCGA-ET-A39S-01	0.121423	10.037
TCGA-EL-A3TB-01	0.505254	9.69598
TCGA-E8-A432-01	0.56839	8.73553
TCGA-ET-A3BT-01	0.605857	7.44323
TCGA-DJ-A3VL-01	0.194491	11.0989
TCGA-ET-A25K-01	0.199476	12.4481
TCGA-ET-A3BS-01	0.160174	9.98539
TCGA-BJ-A45G-01	0.3235	8.52446
TCGA-H2-A421-01	0.538119	7.97099
TCGA-DE-A0XZ-01	0.596695	9.25194
TCGA-BJ-A45I-01	0.0866164	7.15321
TCGA-KS-A41I-01	0.373048	4.44701
TCGA-DJ-A2PZ-01	0.498384	6.65268
TCGA-DJ-A3V7-01	0.773434	7.72757
TCGA-EL-A3GO-01	0.30621	1.64718
TCGA-EM-A2CL-01	0.19438	5.37732
TCGA-MK-A4N7-01	0.541091	11.6848
TCGA-DJ-A2Q4-01	0.409085	9.83897
TCGA-EL-A3T7-01	0.302061	9.86498
TCGA-DJ-A3UR-01	0.230524	6.5297
TCGA-CE-A13K-01	0.226394	11.11
TCGA-J8-A4HY-01	0.941667	6.99978
TCGA-DJ-A3V5-01	0.53834	7.71074
TCGA-DJ-A1QQ-01	0.376058	9.86536
TCGA-EL-A3H3-01	0.0423354	10.2237
TCGA-DJ-A4UP-01	0.124605	11.4517
TCGA-DE-A7U5-01	0.230987	6.73688
TCGA-EL-A4K6-01	0.637513	10.4606
TCGA-EL-A3MY-01	0.540172	6.22243
TCGA-DJ-A3VA-01	0.189326	9.26633
TCGA-DJ-A4UT-01	0.90959	9.5232
TCGA-ET-A25I-01	0.404251	7.77449
TCGA-BJ-A45E-01	0.043683	0.256648
TCGA-E8-A3X7-01	0.308269	8.27065
TCGA-DJ-A1QH-01	0.541064	7.65492
TCGA-BJ-A0ZB-01	0.931636	9.19773
TCGA-BJ-A3PU-01	0.440151	7.24604
TCGA-EM-A2CT-01	0.157797	7.03797
TCGA-BJ-A192-01	0.273478	1.05109
TCGA-E8-A414-01	0.2395	6.93354
TCGA-FY-A3ON-01	0.199075	8.91301
TCGA-EL-A3CX-01	0.237384	6.30865
TCGA-DJ-A4V2-01	0.238621	8.24129
TCGA-ET-A39M-01	0.257937	8.19604
TCGA-DJ-A3VM-01	0.393358	6.90783
TCGA-BJ-A28S-01	0.549515	9.76711
TCGA-FK-A3SB-01	0.161253	11.1973
TCGA-H2-A422-01	0.392688	8.37873
TCGA-DJ-A3UT-01	0.400879	8.83379
TCGA-EM-A4FN-01	0.385701	9.16235
TCGA-BJ-A4O9-01	0.548821	10.5593
TCGA-FK-A3SD-01	0.401489	0.300885
TCGA-FY-A40L-01	0.512662	9.73664
TCGA-ET-A3DW-01	0.56884	8.37774
TCGA-FY-A4B0-01	0	4.21288
TCGA-ET-A2MZ-01	0.165405	11.53
TCGA-E8-A2JQ-01	0.591225	6.53845
TCGA-DJ-A3VF-01	0.228952	8.31679
TCGA-ET-A39L-01	0.0423855	8.52755
TCGA-EM-A3AP-01	0.282488	5.6683
TCGA-MK-A4N9-01	0.163605	11.9804
TCGA-EM-A22I-01	0.275813	8.81999
TCGA-DJ-A2PN-01	0.16807	8.73943
TCGA-E3-A3DY-01	0.268337	8.97563
TCGA-DJ-A3VD-01	0.231403	4.37448
TCGA-DJ-A2Q3-01	0.43996	8.89781
TCGA-ET-A3DP-01	0.445806	10.5466
TCGA-L6-A4EU-01	1.02484	5.80773
TCGA-EL-A4JW-01	0.308589	7.55075
TCGA-E8-A415-01	0.301641	8.22723
TCGA-BJ-A3EZ-01	0.602846	6.10759
TCGA-ET-A3DU-01	0.404949	6.75693
TCGA-DJ-A3UZ-01	0.0843856	10.7809
TCGA-FK-A3SE-01	0.0815407	10.2333
TCGA-DJ-A2PY-01	0.161558	9.29363
TCGA-DE-A69J-01	0.234432	10.4173
TCGA-EL-A3GP-01	0.519063	3.93346
TCGA-DJ-A3UO-01	0.371026	13.6273
TCGA-EL-A4K4-01	0.312508	6.47288
TCGA-ET-A39I-01	0.313668	10.598
TCGA-DE-A4MB-01	0.696366	8.47099
TCGA-EL-A3CZ-01	0.202607	10.2442
TCGA-DJ-A1QG-01	0.475068	7.04756
TCGA-GE-A2C6-01	0.0446237	11.7618
TCGA-DJ-A3UN-01	0.458031	12.1166
TCGA-BJ-A0YZ-01	0.564158	0.586501
TCGA-EL-A3ZP-01	0.11737	8.69264
TCGA-J8-A3YE-01	0.292244	10.7621
TCGA-DJ-A13T-01	0.224379	11.6768
TCGA-EM-A3FQ-01	0.0828211	6.77509
TCGA-DE-A4MD-06	0	4.3475
TCGA-EL-A3CP-01	0.198648	8.39824
TCGA-DJ-A3UY-01	0.0853465	8.00166
TCGA-EM-A3O7-01	0.31161	8.04499
TCGA-FE-A230-01	0.160918	8.52964
TCGA-EL-A3H1-01	0.713434	3.91316
TCGA-IM-A3U2-01	0.963628	7.72891
TCGA-DJ-A2PS-01	0.0414347	11.516
TCGA-EM-A2CU-01	0.173074	10.0369
TCGA-EM-A1CU-01	0.467556	10.9995
TCGA-ET-A4KN-01	0.340696	5.03485
TCGA-ET-A40Q-01	0.398197	7.86068
TCGA-EL-A3ZH-01	0.305353	9.83055
TCGA-ET-A3BQ-01	0.369182	11.7617
TCGA-FY-A3R7-01	0.197625	9.99637
TCGA-ET-A3BX-01	0.278382	8.66741
TCGA-DJ-A2Q2-01	0.277747	4.49422
TCGA-DJ-A1QE-01	0.539137	7.70302
TCGA-EL-A3ZL-01	0.310178	9.26942
TCGA-EM-A2CS-06	0	12.1635
TCGA-DJ-A13U-01	0.332095	8.02049
TCGA-DJ-A2Q5-01	0.236442	10.3734
TCGA-EL-A4JZ-01	0.320079	9.4678
TCGA-EM-A22N-01	0.277668	1.71857
TCGA-BJ-A2N7-01	0.122106	11.383
TCGA-J8-A4HW-06	0	9.33655
TCGA-DJ-A1QD-01	0.310878	9.8787
TCGA-BJ-A0ZE-01	0.419481	7.58702
TCGA-EM-A4FH-01	0.206132	1.16459
TCGA-BJ-A45D-01	0.16567	7.48566
TCGA-ET-A2MX-01	0.34751	5.42092
TCGA-EL-A3CW-01	0.121613	5.12028
TCGA-EM-A3AN-01	0.229419	9.14219
TCGA-CE-A482-01	0.165324	11.0626
TCGA-BJ-A0ZH-01	0.422811	8.06877
TCGA-EM-A3ST-01	0.582511	11.1007
TCGA-BJ-A290-01	0.656766	12.9396
TCGA-FY-A3I5-01	0.403368	4.94347
TCGA-FY-A4B4-01	0.274657	8.40271
TCGA-FY-A4B3-01	0.281627	8.90993
TCGA-FY-A3RA-01	0.160524	10.6365
TCGA-DJ-A2QB-01	0.397364	8.50791
TCGA-ET-A39P-01	0.552712	6.52538
TCGA-DE-A0Y2-01	0.537536	10.8755
TCGA-BJ-A0ZG-01	0.223451	0.721504
TCGA-DJ-A2PQ-01	0.0833338	8.2074
TCGA-EL-A3ZR-01	0.360363	10.0663
TCGA-DJ-A3VG-01	0.463675	9.71852
TCGA-E8-A434-01	0.126782	5.76121
TCGA-DJ-A2Q6-01	0.198565	11.033
TCGA-DJ-A2Q1-01	0.315049	2.45631
TCGA-DJ-A13R-01	0.361708	0.278461
TCGA-EM-A2P3-01	0.300831	9.31685
TCGA-BJ-A28T-01	0.0407229	5.64565
TCGA-ET-A39O-01	0.276607	8.25384
TCGA-EL-A3T1-01	0.466841	6.14641
TCGA-EL-A3CO-01	0.201464	3.54573
TCGA-E8-A44M-01	0.125968	9.20541
TCGA-EM-A1CS-01	0.157363	8.23603
TCGA-CE-A485-01	0.127348	9.59676
TCGA-BJ-A0Z3-01	0.195415	7.64891
TCGA-EL-A3ZK-01	0.339421	5.95441
TCGA-EM-A3FJ-01	0.0888852	9.26088
TCGA-DJ-A4UQ-01	0.470322	11.6778
TCGA-E8-A44K-01	0.248058	8.14418
TCGA-KS-A4IC-01	0.127163	8.27357
TCGA-EM-A1YB-01	0.877688	1.92193
TCGA-EL-A3H8-01	0.271496	7.28067
TCGA-BJ-A191-01	0.55093	7.67774
TCGA-FY-A2QD-01	0.207061	1.13389
TCGA-DJ-A2PT-01	0.304291	7.52299
TCGA-FY-A40M-01	0.343806	10.4397
TCGA-EM-A2OZ-01	0.383673	7.38832
TCGA-BJ-A28X-01	0.158206	9.19769
TCGA-EL-A3GW-01	0.271425	11.6988
TCGA-BJ-A0Z2-01	0.480455	8.5565
TCGA-EM-A3FQ-06	0	9.19794
TCGA-IM-A41Y-01	0.72292	11.1027
TCGA-DJ-A13L-01	0.953302	6.01221
TCGA-DO-A1JZ-01	0.19787	13.5064
TCGA-EL-A3MX-01	0.831481	9.9696
TCGA-FY-A3W9-01	0.499867	7.98794
TCGA-ET-A2MY-01	1.2159	9.36392
TCGA-EL-A3T8-01	0.342774	9.32588
TCGA-ET-A25R-01	0.302018	8.80146
TCGA-DJ-A1QL-01	0.412141	1.82952
TCGA-L6-A4ET-01	0.235055	8.24881
TCGA-E3-A3E5-01	0.377411	11.2058
TCGA-EM-A3FK-01	0.225685	11.1455
TCGA-EL-A3GU-01	0.586348	9.2006
TCGA-H2-A3RI-01	0.0826141	7.97105
TCGA-DJ-A3V8-01	0.345224	9.88172
TCGA-EM-A3SU-06	0	10.2672
TCGA-DJ-A2Q9-01	0.438637	3.44751
TCGA-EL-A3CV-01	0.24044	6.96235
TCGA-BJ-A45F-01	0.371261	4.23547
TCGA-KS-A41L-01	0.299432	0.423955
TCGA-J8-A3NZ-01	0.162155	9.05252
TCGA-DO-A1K0-01	0.237927	8.74587
TCGA-E3-A3DZ-01	0.555928	8.09305
TCGA-EM-A3SX-01	0.781691	7.20852
TCGA-DJ-A3VI-01	0.562388	8.0634
TCGA-ET-A39J-01	0.277603	11.711
TCGA-DJ-A1QI-01	0.240721	9.57738
TCGA-EL-A3N3-01	0.432185	6.88561
TCGA-L6-A4EP-01	0.461009	10.8144
TCGA-DJ-A13V-01	0.260673	11.8984
TCGA-DE-A2OL-01	0.307504	4.09044
TCGA-FY-A3I4-01	0.202865	9.03735
TCGA-EM-A4FQ-01	0.276364	9.90068
TCGA-EM-A2P1-01	0.156057	7.99102
TCGA-EM-A2OV-01	0.428491	2.22799
TCGA-EL-A3GQ-01	0.397158	9.69991
TCGA-EL-A4JV-01	0.278915	8.93007
TCGA-EL-A3T3-01	0.494166	8.81533
TCGA-CE-A3ME-01	0.199684	8.07645
TCGA-DJ-A3VK-01	0.437327	11.4245
TCGA-EL-A3D1-01	0.232569	11.1155
TCGA-BJ-A0Z9-01	0.504816	8.38804
TCGA-E3-A3E3-01	0.395841	8.40962
TCGA-KS-A4ID-01	0.338833	5.42738
TCGA-FY-A40N-01	0.122297	11.035
TCGA-BJ-A18Z-01	0.550632	8.93354
TCGA-EL-A3ZO-01	1.52377	8.55948
TCGA-FE-A233-01	0.337736	8.92332
TCGA-DJ-A4UW-01	0.279688	10.4297
TCGA-DE-A4M8-01	0.3194	8.53494
TCGA-EM-A3AL-01	0.335231	0.763242
TCGA-J8-A3YH-06	0	12.9595
TCGA-FE-A236-01	0.303972	9.58475
TCGA-4C-A93U-01	1.18534	8.66809
TCGA-BJ-A28Z-01	0.454649	8.24675
TCGA-EM-A3AK-01	0.268823	10.4889
TCGA-EL-A3CS-01	0.44831	6.16092
TCGA-FY-A3R6-01	0.231317	9.75186
TCGA-KS-A4I9-01	0.309313	6.40338
TCGA-EM-A2CJ-01	0.393931	0.741057
TCGA-CE-A484-01	0.516279	5.88621
TCGA-DO-A2HM-01	1.38814	6.75375
TCGA-DJ-A13M-01	0.191478	8.72771
TCGA-ET-A3BP-01	0.167576	8.16096
TCGA-EL-A3TA-01	0.127532	9.49694
TCGA-EM-A22J-01	0.4447	6.39065
TCGA-IM-A3U3-01	0.698689	10.7449
TCGA-EM-A2CP-01	0.0415742	3.90887
TCGA-EM-A22L-01	0.300099	8.86813
TCGA-DE-A4M9-01	0.31227	3.20627
TCGA-DJ-A3UK-01	0.120953	10.0232
TCGA-DE-A4MC-01	0.408067	8.83288
TCGA-EL-A3T0-01	0.334755	10.5716
TCGA-ET-A3BW-01	0.125201	12.7612
TCGA-EL-A3ZQ-01	0.338013	8.79927
TCGA-E8-A413-01	0.080598	6.70444
TCGA-EM-A22P-01	0.436859	9.25548
TCGA-FK-A3SG-01	0.197798	10.0296
TCGA-DJ-A2Q0-01	0.667473	0.227002
TCGA-BJ-A4O8-01	0.237721	10.4718
TCGA-EM-A22M-01	0.380806	8.74339
TCGA-DE-A4MA-01	0.306972	8.89348
TCGA-DE-A4MD-01	0.702682	4.00551
TCGA-EL-A3CY-01	0	8.52607
TCGA-FE-A3PB-01	0.124246	6.84221
TCGA-EM-A3AR-01	0.123922	10.5737
TCGA-EM-A3OB-01	0.197647	11.519
TCGA-DJ-A3UX-01	0.229145	11.0667
TCGA-KS-A4I1-01	0.157636	11.7529
TCGA-EL-A3ZG-01	0.0803478	9.55568
TCGA-ET-A2N5-01	0.33691	9.45926
TCGA-ET-A3DT-01	0.0841181	7.20636
TCGA-EL-A3GX-01	0.298228	7.64026
TCGA-EM-A2OW-01	0.331108	1.26586
TCGA-EM-A2CO-01	0.386263	1.53122
TCGA-EM-A22K-01	0.231559	8.87926
TCGA-DJ-A3VE-01	0.259609	9.01668
TCGA-BJ-A2P4-01	0.375653	8.49851
TCGA-EM-A4FU-01	0.162653	7.74408
TCGA-FE-A3PC-01	0.493924	8.40905
TCGA-EM-A3SU-01	0.318233	10.4838
TCGA-EM-A4G1-01	0.0877252	7.09104
TCGA-KS-A4IB-01	0.502199	9.70178
TCGA-ET-A3DR-01	0.317337	8.76363
TCGA-EM-A2OY-01	0.45841	1.56023
TCGA-ET-A39T-01	0.200974	7.1047
TCGA-EM-A1YE-01	0.31518	0.766722
TCGA-CE-A3MD-01	0.267019	9.6297
TCGA-L6-A4EQ-01	0.437072	10.1429
TCGA-EM-A3FN-01	0.543444	0.557091
TCGA-FY-A3NM-01	0.38419	3.0567
TCGA-DJ-A2PX-01	0.123329	9.50076
TCGA-EM-A2P0-01	0.0802934	10.0629
TCGA-EL-A3GS-01	0.348354	8.8394
TCGA-EM-A1CT-01	0.464076	8.02404
TCGA-EM-A4FR-01	0.19973	8.24501
TCGA-EL-A4KD-01	0.44373	9.27976
TCGA-ET-A4KQ-01	0.276718	11.7372
TCGA-FE-A231-01	0.342942	7.32137
TCGA-EL-A3H4-01	0.343666	10.6195
TCGA-DJ-A3UW-01	0.122257	6.26106
TCGA-EM-A3AQ-01	0.270868	11.2243
TCGA-EL-A4JX-01	0.310495	7.446
TCGA-ET-A3DQ-01	0.0425701	9.73542
