# Supplementary material for: Differential expression of zinc finger CCHC-type superfamily proteins in thyroid carcinoma and their associations with tumor immunity
Source: Thyroid Res. 2023 Oct 17;16:42. doi: 10.1186/s13044-023-00185-1 (PMC10580525; doi:10.1186/s13044-023-00185-1)
Supplement: Supplementary file 4 — Supplementary Material 4: Table S4. PPI network of ZZCH12 and its correlation with immune and tumor stemness and tumor mutational load [file 13044_2023_185_MOESM4_ESM.xlsx]

## Sheet: motif
Table S4. Chromosomal location and MOTIF structure of the ZCCHC gene family and its correlation and expression with THCA
********************************************************************************
MEME - Motif discovery tool
********************************************************************************
MEME version 5.0.5 (Release date: Mon Mar 18 20:12:19 2019 -0700)
For further information on how to interpret please access http://meme-suite.org.
To get a copy of the MEME software please access http://meme-suite.org.
********************************************************************************
********************************************************************************
REFERENCE
********************************************************************************
If you use this program in your research, please cite:
Timothy L. Bailey and Charles Elkan,
Fitting a mixture model by expectation maximization to discover motifs in biopolymers, Proceedings of the Second International
Conference on Intelligent Systems for Molecular Biology, pp. 28-36,
AAAI Press, Menlo Park, California, 1994.
********************************************************************************
********************************************************************************
TRAINING SET
********************************************************************************
PRIMARY SEQUENCES= .\PROTEINTOTAL
CONTROL SEQUENCES= --none--
ALPHABET= ACDEFGHIKLMNPQRSTVWY
Sequence name Weight Length Sequence name Weight Length
------------- ------ ------ ------------- ------ ------
NP_060212.4 1.0000 1178 NP_149080.2 1.0000 403
NP_001305077.1 1.0000 339 NP_079212.2 1.0000 513
XP_011512137.1 1.0000 528 XP_016863618.1 1.0000 429
NP_001276048.1 1.0000 543 NP_001276049.1 1.0000 543
NP_001276050.1 1.0000 543 NP_115602.2 1.0000 543
XP_005251665.1 1.0000 543 XP_005251669.1 1.0000 543
XP_011516352.1 1.0000 511 XP_011516353.1 1.0000 349
XP_016870686.1 1.0000 511 XP_016870687.1 1.0000 511
XP_016870688.1 1.0000 345 XP_016870689.1 1.0000 345
XP_024303459.1 1.0000 345 XP_047279913.1 1.0000 511
XP_047279914.1 1.0000 511 XP_047279915.1 1.0000 345
XP_047279916.1 1.0000 345 XP_047279918.1 1.0000 253
NP_001337864.1 1.0000 630 NP_001337865.1 1.0000 608
NP_001337866.1 1.0000 469 NP_001337867.1 1.0000 469
NP_060082.2 1.0000 707 XP_047285073.1 1.0000 616
XP_047285074.1 1.0000 449 NP_001124507.1 1.0000 271
NP_001124508.1 1.0000 271 NP_115656.1 1.0000 271
XP_047273783.1 1.0000 271 XP_047273784.1 1.0000 271
NP_001287745.1 1.0000 192 NP_001287746.1 1.0000 186
NP_001287747.1 1.0000 178 NP_001287748.1 1.0000 156
NP_001287751.1 1.0000 114 NP_001295056.1 1.0000 202
NP_001295057.1 1.0000 116 NP_001295058.1 1.0000 102
NP_001295059.1 1.0000 92 NP_060135.1 1.0000 170
XP_011541804.1 1.0000 188 XP_011541805.1 1.0000 124
NP_001299820.1 1.0000 402 NP_776159.1 1.0000 402
NP_055959.2 1.0000 1086 XP_005255915.3 1.0000 1099
XP_016878571.1 1.0000 926 NP_001269495.1 1.0000 263
NP_001269496.1 1.0000 243 NP_001269497.1 1.0000 241
NP_001269498.1 1.0000 233 NP_001269499.1 1.0000 217
NP_001269500.1 1.0000 179 NP_001269501.1 1.0000 168
NP_001269502.1 1.0000 160 NP_001269503.1 1.0000 146
NP_057589.2 1.0000 241 XP_047278464.1 1.0000 241
NP_001137450.1 1.0000 403 XP_011529314.1 1.0000 403
NP_699198.2 1.0000 241 XP_011537754.1 1.0000 171
********************************************************************************
********************************************************************************
COMMAND LINE SUMMARY
********************************************************************************
This information can also be useful in the event you wish to report a
problem with the MEME software.
command: meme .\PROTEINTOTAL -evt 10.0 -nmotifs 16 -minw 6 -maxw 50 -mod zoops
model: mod= zoops nmotifs= 16 evt= 10
objective function: em= E-value of product of p-values
starts= E-value of product of p-values
width: minw= 6 maxw= 50
nsites: minsites= 2 maxsites= 68 wnsites= 0.8
theta: spmap= pam spfuzz= 120
em: prior= megap b= 130590 maxiter= 50
distance= 1e-05
trim: wg= 11 ws= 1 endgaps= yes
data: n= 26118 N= 68
sample: seed= 0 hsfrac= 0
searchsize= 26118 norand= no csites= 1000
Dirichlet mixture priors file: prior30.plib
Letter frequencies in dataset:
A 0.0517 C 0.0306 D 0.0549 E 0.0796 F 0.028 G 0.0566 H 0.0312 I 0.0378 K 0.0897
L 0.07 M 0.0194 N 0.0432 P 0.0669 Q 0.043 R 0.0626 S 0.107 T 0.0436 V 0.0466
W 0.011 Y 0.0264
Background letter frequencies (from file dataset with add-one prior applied):
A 0.0517 C 0.0306 D 0.0549 E 0.0795 F 0.028 G 0.0565 H 0.0312 I 0.0378 K 0.0897
L 0.0699 M 0.0194 N 0.0432 P 0.0669 Q 0.043 R 0.0626 S 0.107 T 0.0437 V 0.0466
W 0.0111 Y 0.0264
Background model order: 0
********************************************************************************
********************************************************************************
MOTIF FRHSWDKQCDRCHMLGHYTDACTEIWRQYHLTTKPGPPKKPKTPSRPSAL MEME-1	width = 50 sites = 28 llr = 3299 E-value = 1.8e-994
********************************************************************************
--------------------------------------------------------------------------------
	Motif FRHSWDKQCDRCHMLGHYTDACTEIWRQYHLTTKPGPPKKPKTPSRPSAL MEME-1 Description
--------------------------------------------------------------------------------
Simplified A :4::::::::::::::::::6::::::::::::::4::::4:::::::5:
pos.-specific C ::::::::a::a:::::::::a:::::::::::2:::::::::::::::2
probability D :::::6:::6:::::::::6::::::::::::::::::::2:::::::::
matrix E 4::::::::::::4::::::4::6::::::::2::242:::::4:4::::
F 6:::::::::::::4::::::::::::::::::::::::::::::::2::
G :::::::::::::::a:::::::4:::::::::::5::::::::::::::
H ::6::4::::::6:::a::::::::::::a::::::::::::::::::::
I ::::::::::::::::::::::::6:::::::::::::::::::::::2:
K :::4::6:::4:::::::::::::4:4::::::5::::88:54:4:::::
L ::::::::::::4:6:::::::::::::4:6::::::4:::4::::::48
M :::::::::::::6::::::::::::::::::::::::::::::::::::
N ::4:::::::::::::::::::::::::::::::::::::::::::4:::
P :::::::::::::::::::::::::::::::4::6:55::52:6::6:::
Q ::::4::6:4:::::::::::::::::6::::::::::::::::::::::
R :6:::::4::6::::::::::::::46:::4::4::2::::::::5:4::
S :::6::::::::::::::::::::::::::::4:::::::::2:52:5::
T ::::::::::::::::::a:::a::::::::65:4:::::::5:::::::
V ::::::4:::::::::::::::::::::::::::::::2:::::2:::::
W ::::6::::::::::::4:::::::6::::::::::::::::::::::::
Y :::::::::::::::::6:4:::::::46::::::::::2::::::::::
bits 6.5
5.8
5.2 * * * * *
4.5 * * * *** ** * *
Relative 3.9 * * * * *** ***** ** * ***
Entropy 3.2 *** ** *** ************ ** ***** * ** * *
(170.0 bits) 2.6 ***************************************** ** ****
1.9 **************************************************
1.3 **************************************************
0.6 **************************************************
0.0 --------------------------------------------------
Multilevel FRHSWDKQCDRCHMLGHYTDACTEIWRQYHLTTKPGPPKKPKTPSRPSAL
consensus EANKQHVR QK LEF W YE GKRKYL RPSRTAEL ALKEKENRL
sequence
--------------------------------------------------------------------------------
--------------------------------------------------------------------------------
	Motif FRHSWDKQCDRCHMLGHYTDACTEIWRQYHLTTKPGPPKKPKTPSRPSAL MEME-1 sites sorted by position p-value
--------------------------------------------------------------------------------
Sequence name Start P-value Site
------------- ----- --------- --------------------------------------------------
XP_047279918.1 8 3.26e-62 MLDHSCL FRHSWDKQCDRCHMLGHYTDACTEIWRQYHLTTKPGPPKKPKTPSRPSAL AYCYHCAQKG
XP_047279916.1 100 3.26e-62 VPKMLDHSCL FRHSWDKQCDRCHMLGHYTDACTEIWRQYHLTTKPGPPKKPKTPSRPSAL AYCYHCAQKG
XP_047279915.1 100 3.26e-62 VPKMLDHSCL FRHSWDKQCDRCHMLGHYTDACTEIWRQYHLTTKPGPPKKPKTPSRPSAL AYCYHCAQKG
XP_024303459.1 100 3.26e-62 VPKMLDHSCL FRHSWDKQCDRCHMLGHYTDACTEIWRQYHLTTKPGPPKKPKTPSRPSAL AYCYHCAQKG
XP_016870689.1 100 3.26e-62 VPKMLDHSCL FRHSWDKQCDRCHMLGHYTDACTEIWRQYHLTTKPGPPKKPKTPSRPSAL AYCYHCAQKG
XP_016870688.1 100 3.26e-62 VPKMLDHSCL FRHSWDKQCDRCHMLGHYTDACTEIWRQYHLTTKPGPPKKPKTPSRPSAL AYCYHCAQKG
XP_011516353.1 104 3.26e-62 VPKMLDHSCL FRHSWDKQCDRCHMLGHYTDACTEIWRQYHLTTKPGPPKKPKTPSRPSAL AYCYHCAQKG
XP_005251669.1 298 3.26e-62 VPKMLDHSCL FRHSWDKQCDRCHMLGHYTDACTEIWRQYHLTTKPGPPKKPKTPSRPSAL AYCYHCAQKG
XP_005251665.1 298 3.26e-62 VPKMLDHSCL FRHSWDKQCDRCHMLGHYTDACTEIWRQYHLTTKPGPPKKPKTPSRPSAL AYCYHCAQKG
NP_115602.2 298 3.26e-62 VPKMLDHSCL FRHSWDKQCDRCHMLGHYTDACTEIWRQYHLTTKPGPPKKPKTPSRPSAL AYCYHCAQKG
NP_001276050.1 298 3.26e-62 VPKMLDHSCL FRHSWDKQCDRCHMLGHYTDACTEIWRQYHLTTKPGPPKKPKTPSRPSAL AYCYHCAQKG
NP_001276049.1 298 3.26e-62 VPKMLDHSCL FRHSWDKQCDRCHMLGHYTDACTEIWRQYHLTTKPGPPKKPKTPSRPSAL AYCYHCAQKG
NP_001276048.1 298 3.26e-62 VPKMLDHSCL FRHSWDKQCDRCHMLGHYTDACTEIWRQYHLTTKPGPPKKPKTPSRPSAL AYCYHCAQKG
XP_047279914.1 298 4.22e-52 VPKMLDHSCL FRHSWDKQCDRCHMLGHYTDACTEIWRQYHLTECPEREVYDPSPVSPFIC YYDDKYEIQE
XP_047279913.1 298 4.22e-52 VPKMLDHSCL FRHSWDKQCDRCHMLGHYTDACTEIWRQYHLTECPEREVYDPSPVSPFIC YYDDKYEIQE
XP_016870687.1 298 4.22e-52 VPKMLDHSCL FRHSWDKQCDRCHMLGHYTDACTEIWRQYHLTECPEREVYDPSPVSPFIC YYDDKYEIQE
XP_016870686.1 298 4.22e-52 VPKMLDHSCL FRHSWDKQCDRCHMLGHYTDACTEIWRQYHLTECPEREVYDPSPVSPFIC YYDDKYEIQE
XP_011516352.1 298 4.22e-52 VPKMLDHSCL FRHSWDKQCDRCHMLGHYTDACTEIWRQYHLTECPEREVYDPSPVSPFIC YYDDKYEIQE
XP_011541805.1 47 6.03e-47 YPSQLCVNCS EANKQHVRCQKCLEFGHWTYECTGKRKYLHRPSRTAELKKALKEKENRLL LQQRSFFPPR
XP_011541804.1 47 6.03e-47 YPSQLCVNCS EANKQHVRCQKCLEFGHWTYECTGKRKYLHRPSRTAELKKALKEKENRLL LQQRSKSVTS
NP_060135.1 15 6.03e-47 MHRLIARRQA EANKQHVRCQKCLEFGHWTYECTGKRKYLHRPSRTAELKKALKEKENRLL LQQSIGETNV
NP_001295059.1 15 6.03e-47 MHRLIARRQA EANKQHVRCQKCLEFGHWTYECTGKRKYLHRPSRTAELKKALKEKENRLL LQQRSFFPPR
NP_001295056.1 47 6.03e-47 YPSQLCVNCS EANKQHVRCQKCLEFGHWTYECTGKRKYLHRPSRTAELKKALKEKENRLL LQQSIGETNV
NP_001287751.1 37 6.03e-47 ILIQPSIVIS EANKQHVRCQKCLEFGHWTYECTGKRKYLHRPSRTAELKKALKEKENRLL LQQRSFFPPR
NP_001287748.1 15 6.03e-47 MHRLIARRQA EANKQHVRCQKCLEFGHWTYECTGKRKYLHRPSRTAELKKALKEKENRLL LQQRSKSVTS
NP_001287747.1 37 6.03e-47 ILIQPSIVIS EANKQHVRCQKCLEFGHWTYECTGKRKYLHRPSRTAELKKALKEKENRLL LQQRSKSVTS
NP_001287746.1 37 6.03e-47 ILIQPSIVIS EANKQHVRCQKCLEFGHWTYECTGKRKYLHRPSRTAELKKALKEKENRLL LQQSIGETNV
NP_001287745.1 37 6.03e-47 ILIQPSIVIS EANKQHVRCQKCLEFGHWTYECTGKRKYLHRPSRTAELKKALKEKENRLL LQQSIGETNV
--------------------------------------------------------------------------------
--------------------------------------------------------------------------------
	Motif FRHSWDKQCDRCHMLGHYTDACTEIWRQYHLTTKPGPPKKPKTPSRPSAL MEME-1 block diagrams
--------------------------------------------------------------------------------
SEQUENCE NAME POSITION P-VALUE MOTIF DIAGRAM
------------- ---------------- -------------
XP_047279918.1 3.3e-62 7_[1]_196
XP_047279916.1 3.3e-62 99_[1]_196
XP_047279915.1 3.3e-62 99_[1]_196
XP_024303459.1 3.3e-62 99_[1]_196
XP_016870689.1 3.3e-62 99_[1]_196
XP_016870688.1 3.3e-62 99_[1]_196
XP_011516353.1 3.3e-62 103_[1]_196
XP_005251669.1 3.3e-62 297_[1]_196
XP_005251665.1 3.3e-62 297_[1]_196
NP_115602.2 3.3e-62 297_[1]_196
NP_001276050.1 3.3e-62 297_[1]_196
NP_001276049.1 3.3e-62 297_[1]_196
NP_001276048.1 3.3e-62 297_[1]_196
XP_047279914.1 4.2e-52 297_[1]_164
XP_047279913.1 4.2e-52 297_[1]_164
XP_016870687.1 4.2e-52 297_[1]_164
XP_016870686.1 4.2e-52 297_[1]_164
XP_011516352.1 4.2e-52 297_[1]_164
XP_011541805.1 6e-47 46_[1]_28
XP_011541804.1 6e-47 46_[1]_92
NP_060135.1 6e-47 14_[1]_106
NP_001295059.1 6e-47 14_[1]_28
NP_001295056.1 6e-47 46_[1]_106
NP_001287751.1 6e-47 36_[1]_28
NP_001287748.1 6e-47 14_[1]_92
NP_001287747.1 6e-47 36_[1]_92
NP_001287746.1 6e-47 36_[1]_100
NP_001287745.1 6e-47 36_[1]_106
--------------------------------------------------------------------------------
--------------------------------------------------------------------------------
	Motif FRHSWDKQCDRCHMLGHYTDACTEIWRQYHLTTKPGPPKKPKTPSRPSAL MEME-1 in BLOCKS format
--------------------------------------------------------------------------------
BL MOTIF FRHSWDKQCDRCHMLGHYTDACTEIWRQYHLTTKPGPPKKPKTPSRPSAL width=50 seqs=28
XP_047279918.1 ( 8) FRHSWDKQCDRCHMLGHYTDACTEIWRQYHLTTKPGPPKKPKTPSRPSAL 1
XP_047279916.1 ( 100) FRHSWDKQCDRCHMLGHYTDACTEIWRQYHLTTKPGPPKKPKTPSRPSAL 1
XP_047279915.1 ( 100) FRHSWDKQCDRCHMLGHYTDACTEIWRQYHLTTKPGPPKKPKTPSRPSAL 1
XP_024303459.1 ( 100) FRHSWDKQCDRCHMLGHYTDACTEIWRQYHLTTKPGPPKKPKTPSRPSAL 1
XP_016870689.1 ( 100) FRHSWDKQCDRCHMLGHYTDACTEIWRQYHLTTKPGPPKKPKTPSRPSAL 1
XP_016870688.1 ( 100) FRHSWDKQCDRCHMLGHYTDACTEIWRQYHLTTKPGPPKKPKTPSRPSAL 1
XP_011516353.1 ( 104) FRHSWDKQCDRCHMLGHYTDACTEIWRQYHLTTKPGPPKKPKTPSRPSAL 1
XP_005251669.1 ( 298) FRHSWDKQCDRCHMLGHYTDACTEIWRQYHLTTKPGPPKKPKTPSRPSAL 1
XP_005251665.1 ( 298) FRHSWDKQCDRCHMLGHYTDACTEIWRQYHLTTKPGPPKKPKTPSRPSAL 1
NP_115602.2 ( 298) FRHSWDKQCDRCHMLGHYTDACTEIWRQYHLTTKPGPPKKPKTPSRPSAL 1
NP_001276050.1 ( 298) FRHSWDKQCDRCHMLGHYTDACTEIWRQYHLTTKPGPPKKPKTPSRPSAL 1
NP_001276049.1 ( 298) FRHSWDKQCDRCHMLGHYTDACTEIWRQYHLTTKPGPPKKPKTPSRPSAL 1
NP_001276048.1 ( 298) FRHSWDKQCDRCHMLGHYTDACTEIWRQYHLTTKPGPPKKPKTPSRPSAL 1
XP_047279914.1 ( 298) FRHSWDKQCDRCHMLGHYTDACTEIWRQYHLTECPEREVYDPSPVSPFIC 1
XP_047279913.1 ( 298) FRHSWDKQCDRCHMLGHYTDACTEIWRQYHLTECPEREVYDPSPVSPFIC 1
XP_016870687.1 ( 298) FRHSWDKQCDRCHMLGHYTDACTEIWRQYHLTECPEREVYDPSPVSPFIC 1
XP_016870686.1 ( 298) FRHSWDKQCDRCHMLGHYTDACTEIWRQYHLTECPEREVYDPSPVSPFIC 1
XP_011516352.1 ( 298) FRHSWDKQCDRCHMLGHYTDACTEIWRQYHLTECPEREVYDPSPVSPFIC 1
XP_011541805.1 ( 47) EANKQHVRCQKCLEFGHWTYECTGKRKYLHRPSRTAELKKALKEKENRLL 1
XP_011541804.1 ( 47) EANKQHVRCQKCLEFGHWTYECTGKRKYLHRPSRTAELKKALKEKENRLL 1
NP_060135.1 ( 15) EANKQHVRCQKCLEFGHWTYECTGKRKYLHRPSRTAELKKALKEKENRLL 1
NP_001295059.1 ( 15) EANKQHVRCQKCLEFGHWTYECTGKRKYLHRPSRTAELKKALKEKENRLL 1
NP_001295056.1 ( 47) EANKQHVRCQKCLEFGHWTYECTGKRKYLHRPSRTAELKKALKEKENRLL 1
NP_001287751.1 ( 37) EANKQHVRCQKCLEFGHWTYECTGKRKYLHRPSRTAELKKALKEKENRLL 1
NP_001287748.1 ( 15) EANKQHVRCQKCLEFGHWTYECTGKRKYLHRPSRTAELKKALKEKENRLL 1
NP_001287747.1 ( 37) EANKQHVRCQKCLEFGHWTYECTGKRKYLHRPSRTAELKKALKEKENRLL 1
NP_001287746.1 ( 37) EANKQHVRCQKCLEFGHWTYECTGKRKYLHRPSRTAELKKALKEKENRLL 1
NP_001287745.1 ( 37) EANKQHVRCQKCLEFGHWTYECTGKRKYLHRPSRTAELKKALKEKENRLL 1
//
--------------------------------------------------------------------------------
--------------------------------------------------------------------------------
	Motif FRHSWDKQCDRCHMLGHYTDACTEIWRQYHLTTKPGPPKKPKTPSRPSAL MEME-1 position-specific scoring matrix
--------------------------------------------------------------------------------
log-odds matrix: alength= 20 w= 50 n= 22786 bayes= 9.51041 E= 1.8e-994
-650 -732 -649 215 451 -651 -571 -654 -786 -620 -634 -667 -751 -663 -734 -765 -676 -666 -446 -303
277 -536 -690 -711 -640 -465 -635 -649 -561 -657 -602 -591 -646 -572 333 -494 -451 -536 -634 -646
-585 -723 -460 -623 -571 -524 434 -761 -664 -727 -726 303 -699 -577 -655 -596 -562 -733 -607 -507
-403 -607 -559 -613 -647 -500 -547 -650 197 -641 -596 -474 -663 -484 -429 255 -485 -581 -618 -603
-723 -774 -768 -883 -527 -669 -685 -789 -841 -737 -768 -759 -776 304 -768 -837 -743 -786 585 -480
-659 -766 354 -679 -679 -579 350 -824 -741 -782 -809 -484 -736 -667 -730 -678 -636 -798 -672 -639
-476 -621 -669 -615 -568 -582 -542 -331 280 -492 -483 -551 -695 -454 -381 -633 -498 291 -600 -568
-541 -707 -652 -591 -655 -586 -514 -629 -354 -607 -565 -529 -692 386 250 -648 -534 -609 -594 -580
-354 498 -556 -556 -447 -533 -529 -389 -624 -468 -388 -509 -607 -537 -533 -551 -379 -447 -536 -526
-596 -755 353 -516 -702 -557 -607 -786 -675 -757 -761 -453 -711 303 -687 -640 -597 -747 -682 -662
-404 -612 -551 -432 -579 -491 -358 -473 197 -458 -402 -379 -588 -252 328 -506 -383 -456 -484 -460
-354 498 -556 -556 -447 -533 -529 -389 -624 -468 -388 -509 -607 -537 -533 -551 -379 -447 -536 -526
-677 -731 -770 -872 -427 -675 435 -479 -845 235 -442 -745 -771 -736 -762 -828 -690 -568 -539 -447
-482 -727 -415 216 -582 -583 -628 -554 -596 -539 501 -579 -670 -469 -641 -650 -560 -558 -642 -601
-541 -598 -837 -823 361 -737 -614 -209 -822 317 -168 -733 -747 -618 -717 -802 -542 -319 -409 -351
-446 -659 -551 -657 -636 412 -617 -665 -665 -696 -628 -513 -674 -640 -614 -598 -584 -628 -583 -622
-779 -795 -769 -901 -710 -678 500 -866 -904 -803 -845 -760 -780 -769 -795 -874 -772 -846 -683 -676
-617 -620 -707 -754 -121 -656 -369 -507 -724 -470 -475 -555 -722 -573 -627 -680 -588 -527 495 458
-625 -730 -752 -871 -719 -646 -742 -745 -856 -769 -741 -711 -758 -764 -777 -673 451 -712 -685 -731
-691 -741 353 -769 -370 -634 -568 -711 -799 -670 -687 -587 -755 -696 -738 -746 -677 -715 -456 375
358 -527 -359 215 -629 -432 -584 -590 -550 -609 -543 -496 -580 -409 -595 -454 -405 -482 -644 -628
-354 498 -556 -556 -447 -533 -529 -389 -624 -468 -388 -509 -607 -537 -533 -551 -379 -447 -536 -526
-625 -730 -752 -871 -719 -646 -742 -745 -856 -769 -741 -711 -758 -764 -777 -673 451 -712 -685 -731
-500 -733 -442 300 -718 263 -642 -728 -639 -716 -687 -552 -684 -508 -681 -647 -578 -661 -690 -692
-519 -628 -701 -672 -531 -624 -595 406 196 -452 -460 -603 -725 -519 -450 -697 -527 -299 -613 -573
-734 -781 -770 -864 -576 -671 -694 -806 -742 -756 -783 -756 -775 -736 251 -843 -741 -796 585 -531
-404 -612 -551 -432 -579 -491 -358 -473 197 -458 -402 -379 -588 -252 328 -506 -383 -456 -484 -460
-653 -682 -722 -795 -228 -656 -465 -598 -751 -559 -567 -621 -746 386 -674 -735 -646 -613 -325 375
-605 -628 -734 -780 -161 -670 -419 -386 -755 232 -350 -597 -733 -599 -657 -713 -589 -459 -270 457
-779 -795 -769 -901 -710 -678 500 -866 -904 -803 -845 -760 -780 -769 -795 -874 -772 -846 -683 -676
-622 -705 -765 -792 -435 -665 -671 -408 -619 319 -370 -711 -756 -632 249 -789 -634 -500 -574 -567
-463 -648 -732 -837 -699 -568 -730 -738 -844 -746 -719 -685 240 -738 -761 -614 387 -653 -678 -714
-232 -420 -358 99 -476 -372 -460 -396 -487 -499 -372 -287 -522 -393 -480 158 343 -348 -507 -500
-386 240 -537 -417 -567 -478 -343 -458 232 -443 -386 -363 -575 -236 246 -490 -367 -440 -472 -446
-423 -634 -663 -719 -646 -548 -665 -664 -727 -662 -652 -642 326 -641 -682 -590 299 -602 -654 -675
276 -423 -455 112 -573 298 -580 -563 -621 -590 -510 -445 -547 -485 -600 -367 -331 -423 -603 -602
-345 -675 -273 213 -602 -478 -466 -530 -362 -529 -481 -405 272 -301 141 -499 -412 -479 -601 -552
-362 -614 -394 112 -457 -509 -543 -420 -525 225 -397 -496 279 -421 -544 -526 -444 -442 -565 -534
-475 -633 -653 -590 -585 -569 -516 -391 316 -517 -497 -526 -680 -426 -341 -618 -495 190 -583 -557
-601 -700 -685 -671 -328 -622 -495 -617 317 -589 -575 -573 -720 -505 -438 -696 -588 -618 -411 275
270 -460 158 -492 -531 -375 -519 -522 -566 -534 -494 -403 280 -471 -546 -388 -345 -432 -578 -563
-449 -631 -597 -516 -486 -537 -445 -436 234 229 -392 -458 134 -349 -273 -569 -452 -465 -521 -492
-255 -434 -428 -480 -479 -394 -423 -393 180 -476 -362 -302 -534 -348 -318 64 342 -353 -486 -479
-487 -718 -495 214 -663 -586 -638 -670 -645 -660 -651 -602 325 -533 -656 -642 -564 -628 -664 -674
-248 -469 -519 -497 -535 -392 -440 -425 194 -487 -433 -400 -564 -349 -286 203 -346 186 -528 -500
-321 -609 -267 212 -586 -422 -399 -506 -275 -504 -444 -317 -538 -268 278 64 -368 -457 -553 -496
-557 -724 -595 -723 -688 -587 -658 -755 -749 -732 -744 303 326 -672 -718 -668 -613 -713 -675 -683
-326 -527 -582 -632 265 -460 -461 -545 -487 -532 -505 -477 -631 -495 246 206 -433 -493 -367 -221
307 -520 -783 -765 -272 -648 -680 225 -773 234 -186 -684 -717 -622 -707 -675 -449 -186 -476 -481
-527 248 -778 -809 -335 -655 -688 -283 -812 353 -252 -731 -729 -654 -720 -735 -561 -369 -515 -524
--------------------------------------------------------------------------------
--------------------------------------------------------------------------------
	Motif FRHSWDKQCDRCHMLGHYTDACTEIWRQYHLTTKPGPPKKPKTPSRPSAL MEME-1 position-specific probability matrix
--------------------------------------------------------------------------------
letter-probability matrix: alength= 20 w= 50 nsites= 28 E= 1.8e-994
0.000000 0.000000 0.000000 0.357143 0.642857 0.000000 0.000000 0.000000 0.000000 0.000000 0.000000 0.000000 0.000000 0.000000 0.000000 0.000000 0.000000 0.000000 0.000000 0.000000
0.357143 0.000000 0.000000 0.000000 0.000000 0.000000 0.000000 0.000000 0.000000 0.000000 0.000000 0.000000 0.000000 0.000000 0.642857 0.000000 0.000000 0.000000 0.000000 0.000000
0.000000 0.000000 0.000000 0.000000 0.000000 0.000000 0.642857 0.000000 0.000000 0.000000 0.000000 0.357143 0.000000 0.000000 0.000000 0.000000 0.000000 0.000000 0.000000 0.000000
0.000000 0.000000 0.000000 0.000000 0.000000 0.000000 0.000000 0.000000 0.357143 0.000000 0.000000 0.000000 0.000000 0.000000 0.000000 0.642857 0.000000 0.000000 0.000000 0.000000
0.000000 0.000000 0.000000 0.000000 0.000000 0.000000 0.000000 0.000000 0.000000 0.000000 0.000000 0.000000 0.000000 0.357143 0.000000 0.000000 0.000000 0.000000 0.642857 0.000000
0.000000 0.000000 0.642857 0.000000 0.000000 0.000000 0.357143 0.000000 0.000000 0.000000 0.000000 0.000000 0.000000 0.000000 0.000000 0.000000 0.000000 0.000000 0.000000 0.000000
0.000000 0.000000 0.000000 0.000000 0.000000 0.000000 0.000000 0.000000 0.642857 0.000000 0.000000 0.000000 0.000000 0.000000 0.000000 0.000000 0.000000 0.357143 0.000000 0.000000
0.000000 0.000000 0.000000 0.000000 0.000000 0.000000 0.000000 0.000000 0.000000 0.000000 0.000000 0.000000 0.000000 0.642857 0.357143 0.000000 0.000000 0.000000 0.000000 0.000000
0.000000 1.000000 0.000000 0.000000 0.000000 0.000000 0.000000 0.000000 0.000000 0.000000 0.000000 0.000000 0.000000 0.000000 0.000000 0.000000 0.000000 0.000000 0.000000 0.000000
0.000000 0.000000 0.642857 0.000000 0.000000 0.000000 0.000000 0.000000 0.000000 0.000000 0.000000 0.000000 0.000000 0.357143 0.000000 0.000000 0.000000 0.000000 0.000000 0.000000
0.000000 0.000000 0.000000 0.000000 0.000000 0.000000 0.000000 0.000000 0.357143 0.000000 0.000000 0.000000 0.000000 0.000000 0.642857 0.000000 0.000000 0.000000 0.000000 0.000000
0.000000 1.000000 0.000000 0.000000 0.000000 0.000000 0.000000 0.000000 0.000000 0.000000 0.000000 0.000000 0.000000 0.000000 0.000000 0.000000 0.000000 0.000000 0.000000 0.000000
0.000000 0.000000 0.000000 0.000000 0.000000 0.000000 0.642857 0.000000 0.000000 0.357143 0.000000 0.000000 0.000000 0.000000 0.000000 0.000000 0.000000 0.000000 0.000000 0.000000
0.000000 0.000000 0.000000 0.357143 0.000000 0.000000 0.000000 0.000000 0.000000 0.000000 0.642857 0.000000 0.000000 0.000000 0.000000 0.000000 0.000000 0.000000 0.000000 0.000000
0.000000 0.000000 0.000000 0.000000 0.357143 0.000000 0.000000 0.000000 0.000000 0.642857 0.000000 0.000000 0.000000 0.000000 0.000000 0.000000 0.000000 0.000000 0.000000 0.000000
0.000000 0.000000 0.000000 0.000000 0.000000 1.000000 0.000000 0.000000 0.000000 0.000000 0.000000 0.000000 0.000000 0.000000 0.000000 0.000000 0.000000 0.000000 0.000000 0.000000
0.000000 0.000000 0.000000 0.000000 0.000000 0.000000 1.000000 0.000000 0.000000 0.000000 0.000000 0.000000 0.000000 0.000000 0.000000 0.000000 0.000000 0.000000 0.000000 0.000000
0.000000 0.000000 0.000000 0.000000 0.000000 0.000000 0.000000 0.000000 0.000000 0.000000 0.000000 0.000000 0.000000 0.000000 0.000000 0.000000 0.000000 0.000000 0.357143 0.642857
0.000000 0.000000 0.000000 0.000000 0.000000 0.000000 0.000000 0.000000 0.000000 0.000000 0.000000 0.000000 0.000000 0.000000 0.000000 0.000000 1.000000 0.000000 0.000000 0.000000
0.000000 0.000000 0.642857 0.000000 0.000000 0.000000 0.000000 0.000000 0.000000 0.000000 0.000000 0.000000 0.000000 0.000000 0.000000 0.000000 0.000000 0.000000 0.000000 0.357143
0.642857 0.000000 0.000000 0.357143 0.000000 0.000000 0.000000 0.000000 0.000000 0.000000 0.000000 0.000000 0.000000 0.000000 0.000000 0.000000 0.000000 0.000000 0.000000 0.000000
0.000000 1.000000 0.000000 0.000000 0.000000 0.000000 0.000000 0.000000 0.000000 0.000000 0.000000 0.000000 0.000000 0.000000 0.000000 0.000000 0.000000 0.000000 0.000000 0.000000
0.000000 0.000000 0.000000 0.000000 0.000000 0.000000 0.000000 0.000000 0.000000 0.000000 0.000000 0.000000 0.000000 0.000000 0.000000 0.000000 1.000000 0.000000 0.000000 0.000000
0.000000 0.000000 0.000000 0.642857 0.000000 0.357143 0.000000 0.000000 0.000000 0.000000 0.000000 0.000000 0.000000 0.000000 0.000000 0.000000 0.000000 0.000000 0.000000 0.000000
0.000000 0.000000 0.000000 0.000000 0.000000 0.000000 0.000000 0.642857 0.357143 0.000000 0.000000 0.000000 0.000000 0.000000 0.000000 0.000000 0.000000 0.000000 0.000000 0.000000
0.000000 0.000000 0.000000 0.000000 0.000000 0.000000 0.000000 0.000000 0.000000 0.000000 0.000000 0.000000 0.000000 0.000000 0.357143 0.000000 0.000000 0.000000 0.642857 0.000000
0.000000 0.000000 0.000000 0.000000 0.000000 0.000000 0.000000 0.000000 0.357143 0.000000 0.000000 0.000000 0.000000 0.000000 0.642857 0.000000 0.000000 0.000000 0.000000 0.000000
0.000000 0.000000 0.000000 0.000000 0.000000 0.000000 0.000000 0.000000 0.000000 0.000000 0.000000 0.000000 0.000000 0.642857 0.000000 0.000000 0.000000 0.000000 0.000000 0.357143
0.000000 0.000000 0.000000 0.000000 0.000000 0.000000 0.000000 0.000000 0.000000 0.357143 0.000000 0.000000 0.000000 0.000000 0.000000 0.000000 0.000000 0.000000 0.000000 0.642857
0.000000 0.000000 0.000000 0.000000 0.000000 0.000000 1.000000 0.000000 0.000000 0.000000 0.000000 0.000000 0.000000 0.000000 0.000000 0.000000 0.000000 0.000000 0.000000 0.000000
0.000000 0.000000 0.000000 0.000000 0.000000 0.000000 0.000000 0.000000 0.000000 0.642857 0.000000 0.000000 0.000000 0.000000 0.357143 0.000000 0.000000 0.000000 0.000000 0.000000
0.000000 0.000000 0.000000 0.000000 0.000000 0.000000 0.000000 0.000000 0.000000 0.000000 0.000000 0.000000 0.357143 0.000000 0.000000 0.000000 0.642857 0.000000 0.000000 0.000000
0.000000 0.000000 0.000000 0.178571 0.000000 0.000000 0.000000 0.000000 0.000000 0.000000 0.000000 0.000000 0.000000 0.000000 0.000000 0.357143 0.464286 0.000000 0.000000 0.000000
0.000000 0.178571 0.000000 0.000000 0.000000 0.000000 0.000000 0.000000 0.464286 0.000000 0.000000 0.000000 0.000000 0.000000 0.357143 0.000000 0.000000 0.000000 0.000000 0.000000
0.000000 0.000000 0.000000 0.000000 0.000000 0.000000 0.000000 0.000000 0.000000 0.000000 0.000000 0.000000 0.642857 0.000000 0.000000 0.000000 0.357143 0.000000 0.000000 0.000000
0.357143 0.000000 0.000000 0.178571 0.000000 0.464286 0.000000 0.000000 0.000000 0.000000 0.000000 0.000000 0.000000 0.000000 0.000000 0.000000 0.000000 0.000000 0.000000 0.000000
0.000000 0.000000 0.000000 0.357143 0.000000 0.000000 0.000000 0.000000 0.000000 0.000000 0.000000 0.000000 0.464286 0.000000 0.178571 0.000000 0.000000 0.000000 0.000000 0.000000
0.000000 0.000000 0.000000 0.178571 0.000000 0.000000 0.000000 0.000000 0.000000 0.357143 0.000000 0.000000 0.464286 0.000000 0.000000 0.000000 0.000000 0.000000 0.000000 0.000000
0.000000 0.000000 0.000000 0.000000 0.000000 0.000000 0.000000 0.000000 0.821429 0.000000 0.000000 0.000000 0.000000 0.000000 0.000000 0.000000 0.000000 0.178571 0.000000 0.000000
0.000000 0.000000 0.000000 0.000000 0.000000 0.000000 0.000000 0.000000 0.821429 0.000000 0.000000 0.000000 0.000000 0.000000 0.000000 0.000000 0.000000 0.000000 0.000000 0.178571
0.357143 0.000000 0.178571 0.000000 0.000000 0.000000 0.000000 0.000000 0.000000 0.000000 0.000000 0.000000 0.464286 0.000000 0.000000 0.000000 0.000000 0.000000 0.000000 0.000000
0.000000 0.000000 0.000000 0.000000 0.000000 0.000000 0.000000 0.000000 0.464286 0.357143 0.000000 0.000000 0.178571 0.000000 0.000000 0.000000 0.000000 0.000000 0.000000 0.000000
0.000000 0.000000 0.000000 0.000000 0.000000 0.000000 0.000000 0.000000 0.357143 0.000000 0.000000 0.000000 0.000000 0.000000 0.000000 0.178571 0.464286 0.000000 0.000000 0.000000
0.000000 0.000000 0.000000 0.357143 0.000000 0.000000 0.000000 0.000000 0.000000 0.000000 0.000000 0.000000 0.642857 0.000000 0.000000 0.000000 0.000000 0.000000 0.000000 0.000000
0.000000 0.000000 0.000000 0.000000 0.000000 0.000000 0.000000 0.000000 0.357143 0.000000 0.000000 0.000000 0.000000 0.000000 0.000000 0.464286 0.000000 0.178571 0.000000 0.000000
0.000000 0.000000 0.000000 0.357143 0.000000 0.000000 0.000000 0.000000 0.000000 0.000000 0.000000 0.000000 0.000000 0.000000 0.464286 0.178571 0.000000 0.000000 0.000000 0.000000
0.000000 0.000000 0.000000 0.000000 0.000000 0.000000 0.000000 0.000000 0.000000 0.000000 0.000000 0.357143 0.642857 0.000000 0.000000 0.000000 0.000000 0.000000 0.000000 0.000000
0.000000 0.000000 0.000000 0.000000 0.178571 0.000000 0.000000 0.000000 0.000000 0.000000 0.000000 0.000000 0.000000 0.000000 0.357143 0.464286 0.000000 0.000000 0.000000 0.000000
0.464286 0.000000 0.000000 0.000000 0.000000 0.000000 0.000000 0.178571 0.000000 0.357143 0.000000 0.000000 0.000000 0.000000 0.000000 0.000000 0.000000 0.000000 0.000000 0.000000
0.000000 0.178571 0.000000 0.000000 0.000000 0.000000 0.000000 0.000000 0.000000 0.821429 0.000000 0.000000 0.000000 0.000000 0.000000 0.000000 0.000000 0.000000 0.000000 0.000000
--------------------------------------------------------------------------------
--------------------------------------------------------------------------------
	Motif FRHSWDKQCDRCHMLGHYTDACTEIWRQYHLTTKPGPPKKPKTPSRPSAL MEME-1 regular expression
--------------------------------------------------------------------------------
[FE][RA][HN][SK][WQ][DH][KV][QR]C[DQ][RK]C[HL][ME][LF]GH[YW]T[DY][AE]CT[EG][IK][WR][RK][QY][YL]H[LR][TP][TS][KR][PT][GA][PE][PL]KK[PA][KL][TK][PE][SK][RE][PN][SR][AL]L
--------------------------------------------------------------------------------
Time 16.97 secs.
********************************************************************************
********************************************************************************
MOTIF ADRHREVDEDFPRGPKTYSSPGSFKTQKPSKPFHRSSHYHTSREDKSPKE MEME-2	width = 50 sites = 23 llr = 2742 E-value = 3.4e-789
********************************************************************************
--------------------------------------------------------------------------------
	Motif ADRHREVDEDFPRGPKTYSSPGSFKTQKPSKPFHRSSHYHTSREDKSPKE MEME-2 Description
--------------------------------------------------------------------------------
Simplified A 8:::::::::::::::::::::::::::::::::::::::::::::::::
pos.-specific C ::::::::::::::::::::::::::::::::::::::::::::::::::
probability D :8:::::8:8::::::::::::::2:::::::::::::::::::a:::::
matrix E :::::a:2a:::::::::22::::::2:::::::::::::::2a::::2a
F :::::::::28::::::2:::::8::::::2:8:::::::::::::::::
G :::::::::::::8:::::::8::::::::::::::::::::::::::::
H :::a:::::::::::::::::::::::::::::8:::8:8:::::2::::
I ::::::2::::::::::::::::::::::::::::::::2::::::::::
K 2::::::::::::::a::::::2:8::a::8::::::::::::::82:8:
L :::::::::::::2::::::::::::::::::22:::::::2::::::::
M ::::::::::::::::::::::::::::::::::::::::::::::::::
N ::::::::::::2::::::::::2:::::::2::::::::::::::::::
P :::::::::::8::8:::::8:::::::8::8::2:2::::::::::8::
Q :2::2:::::::::::::::22::::8::::::::2::::::::::::::
R ::8:8:::::::8:::2:::::::::::::::::8:::::::8:::::::
S :::::::::::2::::::88::8::::::a:::::8822::8::::8:::
T ::::::::::::::::8::::::::8::2:::::::::::8:::::::::
V ::::::8:::2:::2::::::::::2::::::::::::::2::::::2::
W ::::::::::::::::::::::::::::::::::::::::::::::::::
Y ::2::::::::::::::8::::::::::::::::::::8:::::::::::
bits 6.5
5.8
5.2 *
4.5 * * * *
Relative 3.9 * ** *** ** * ** ** **** ** *
Entropy 3.2 ****************** ** * ********** **** **** * *
(172.0 bits) 2.6 **************************************************
1.9 **************************************************
1.3 **************************************************
0.6 **************************************************
0.0 --------------------------------------------------
Multilevel ADRHREVDEDFPRGPKTYSSPGSFKTQKPSKPFHRSSHYHTSREDKSPKE
consensus QY Q IE FVSNLV RFEEQQKNDVE T FNLLPQPSSIVLE HKVE
sequence
--------------------------------------------------------------------------------
--------------------------------------------------------------------------------
	Motif ADRHREVDEDFPRGPKTYSSPGSFKTQKPSKPFHRSSHYHTSREDKSPKE MEME-2 sites sorted by position p-value
--------------------------------------------------------------------------------
Sequence name Start P-value Site
------------- ----- --------- --------------------------------------------------
XP_047279918.1 173 1.12e-61 KNRNWEKHRK ADRHREVDEDFPRGPKTYSSPGSFKTQKPSKPFHRSSHYHTSREDKSPKE GKRGKQKKKE
XP_047279916.1 265 1.12e-61 KNRNWEKHRK ADRHREVDEDFPRGPKTYSSPGSFKTQKPSKPFHRSSHYHTSREDKSPKE GKRGKQKKKE
XP_047279915.1 265 1.12e-61 KNRNWEKHRK ADRHREVDEDFPRGPKTYSSPGSFKTQKPSKPFHRSSHYHTSREDKSPKE GKRGKQKKKE
XP_047279914.1 431 1.12e-61 KNRNWEKHRK ADRHREVDEDFPRGPKTYSSPGSFKTQKPSKPFHRSSHYHTSREDKSPKE GKRGKQKKKE
XP_047279913.1 431 1.12e-61 KNRNWEKHRK ADRHREVDEDFPRGPKTYSSPGSFKTQKPSKPFHRSSHYHTSREDKSPKE GKRGKQKKKE
XP_024303459.1 265 1.12e-61 KNRNWEKHRK ADRHREVDEDFPRGPKTYSSPGSFKTQKPSKPFHRSSHYHTSREDKSPKE GKRGKQKKKE
XP_016870689.1 265 1.12e-61 KNRNWEKHRK ADRHREVDEDFPRGPKTYSSPGSFKTQKPSKPFHRSSHYHTSREDKSPKE GKRGKQKKKE
XP_016870688.1 265 1.12e-61 KNRNWEKHRK ADRHREVDEDFPRGPKTYSSPGSFKTQKPSKPFHRSSHYHTSREDKSPKE GKRGKQKKKE
XP_016870687.1 431 1.12e-61 KNRNWEKHRK ADRHREVDEDFPRGPKTYSSPGSFKTQKPSKPFHRSSHYHTSREDKSPKE GKRGKQKKKE
XP_016870686.1 431 1.12e-61 KNRNWEKHRK ADRHREVDEDFPRGPKTYSSPGSFKTQKPSKPFHRSSHYHTSREDKSPKE GKRGKQKKKE
XP_011516353.1 269 1.12e-61 KNRNWEKHRK ADRHREVDEDFPRGPKTYSSPGSFKTQKPSKPFHRSSHYHTSREDKSPKE GKRGKQKKKE
XP_011516352.1 431 1.12e-61 KNRNWEKHRK ADRHREVDEDFPRGPKTYSSPGSFKTQKPSKPFHRSSHYHTSREDKSPKE GKRGKQKKKE
XP_005251669.1 463 1.12e-61 KNRNWEKHRK ADRHREVDEDFPRGPKTYSSPGSFKTQKPSKPFHRSSHYHTSREDKSPKE GKRGKQKKKE
XP_005251665.1 463 1.12e-61 KNRNWEKHRK ADRHREVDEDFPRGPKTYSSPGSFKTQKPSKPFHRSSHYHTSREDKSPKE GKRGKQKKKE
NP_115602.2 463 1.12e-61 KNRNWEKHRK ADRHREVDEDFPRGPKTYSSPGSFKTQKPSKPFHRSSHYHTSREDKSPKE GKRGKQKKKE
NP_001276050.1 463 1.12e-61 KNRNWEKHRK ADRHREVDEDFPRGPKTYSSPGSFKTQKPSKPFHRSSHYHTSREDKSPKE GKRGKQKKKE
NP_001276049.1 463 1.12e-61 KNRNWEKHRK ADRHREVDEDFPRGPKTYSSPGSFKTQKPSKPFHRSSHYHTSREDKSPKE GKRGKQKKKE
NP_001276048.1 463 1.12e-61 KNRNWEKHRK ADRHREVDEDFPRGPKTYSSPGSFKTQKPSKPFHRSSHYHTSREDKSPKE GKRGKQKKKE
XP_047285074.1 106 3.94e-38 QILFMNNAIS KQYHQEIEEFVSNLVKRFEEQQKNDVEKTSFNLLPQPSSIVLEEDHKVEE SCAIKNNKEA
NP_060082.2 106 3.94e-38 QILFMNNAIS KQYHQEIEEFVSNLVKRFEEQQKNDVEKTSFNLLPQPSSIVLEEDHKVEE SCAIKNNKEA
NP_001337865.1 7 3.94e-38 MNNAIS KQYHQEIEEFVSNLVKRFEEQQKNDVEKTSFNLLPQPSSIVLEEDHKVEE SCAIKNNKEA
NP_001337864.1 106 3.94e-38 QILFMNNAIS KQYHQEIEEFVSNLVKRFEEQQKNDVEKTSFNLLPQPSSIVLEEDHKVEE SCAIKNNKEA
XP_047285073.1 15 6.68e-38 CVAEIDGQET GQYHQEIEEFVSNLVKRFEEQQKNDVEKTSFNLLPQPSSIVLEEDHKVEE SCAIKNNKEA
--------------------------------------------------------------------------------
--------------------------------------------------------------------------------
	Motif ADRHREVDEDFPRGPKTYSSPGSFKTQKPSKPFHRSSHYHTSREDKSPKE MEME-2 block diagrams
--------------------------------------------------------------------------------
SEQUENCE NAME POSITION P-VALUE MOTIF DIAGRAM
------------- ---------------- -------------
XP_047279918.1 1.1e-61 172_[2]_31
XP_047279916.1 1.1e-61 264_[2]_31
XP_047279915.1 1.1e-61 264_[2]_31
XP_047279914.1 1.1e-61 430_[2]_31
XP_047279913.1 1.1e-61 430_[2]_31
XP_024303459.1 1.1e-61 264_[2]_31
XP_016870689.1 1.1e-61 264_[2]_31
XP_016870688.1 1.1e-61 264_[2]_31
XP_016870687.1 1.1e-61 430_[2]_31
XP_016870686.1 1.1e-61 430_[2]_31
XP_011516353.1 1.1e-61 268_[2]_31
XP_011516352.1 1.1e-61 430_[2]_31
XP_005251669.1 1.1e-61 462_[2]_31
XP_005251665.1 1.1e-61 462_[2]_31
NP_115602.2 1.1e-61 462_[2]_31
NP_001276050.1 1.1e-61 462_[2]_31
NP_001276049.1 1.1e-61 462_[2]_31
NP_001276048.1 1.1e-61 462_[2]_31
XP_047285074.1 3.9e-38 105_[2]_294
NP_060082.2 3.9e-38 105_[2]_552
NP_001337865.1 3.9e-38 6_[2]_552
NP_001337864.1 3.9e-38 105_[2]_475
XP_047285073.1 6.7e-38 14_[2]_552
--------------------------------------------------------------------------------
--------------------------------------------------------------------------------
	Motif ADRHREVDEDFPRGPKTYSSPGSFKTQKPSKPFHRSSHYHTSREDKSPKE MEME-2 in BLOCKS format
--------------------------------------------------------------------------------
BL MOTIF ADRHREVDEDFPRGPKTYSSPGSFKTQKPSKPFHRSSHYHTSREDKSPKE width=50 seqs=23
XP_047279918.1 ( 173) ADRHREVDEDFPRGPKTYSSPGSFKTQKPSKPFHRSSHYHTSREDKSPKE 1
XP_047279916.1 ( 265) ADRHREVDEDFPRGPKTYSSPGSFKTQKPSKPFHRSSHYHTSREDKSPKE 1
XP_047279915.1 ( 265) ADRHREVDEDFPRGPKTYSSPGSFKTQKPSKPFHRSSHYHTSREDKSPKE 1
XP_047279914.1 ( 431) ADRHREVDEDFPRGPKTYSSPGSFKTQKPSKPFHRSSHYHTSREDKSPKE 1
XP_047279913.1 ( 431) ADRHREVDEDFPRGPKTYSSPGSFKTQKPSKPFHRSSHYHTSREDKSPKE 1
XP_024303459.1 ( 265) ADRHREVDEDFPRGPKTYSSPGSFKTQKPSKPFHRSSHYHTSREDKSPKE 1
XP_016870689.1 ( 265) ADRHREVDEDFPRGPKTYSSPGSFKTQKPSKPFHRSSHYHTSREDKSPKE 1
XP_016870688.1 ( 265) ADRHREVDEDFPRGPKTYSSPGSFKTQKPSKPFHRSSHYHTSREDKSPKE 1
XP_016870687.1 ( 431) ADRHREVDEDFPRGPKTYSSPGSFKTQKPSKPFHRSSHYHTSREDKSPKE 1
XP_016870686.1 ( 431) ADRHREVDEDFPRGPKTYSSPGSFKTQKPSKPFHRSSHYHTSREDKSPKE 1
XP_011516353.1 ( 269) ADRHREVDEDFPRGPKTYSSPGSFKTQKPSKPFHRSSHYHTSREDKSPKE 1
XP_011516352.1 ( 431) ADRHREVDEDFPRGPKTYSSPGSFKTQKPSKPFHRSSHYHTSREDKSPKE 1
XP_005251669.1 ( 463) ADRHREVDEDFPRGPKTYSSPGSFKTQKPSKPFHRSSHYHTSREDKSPKE 1
XP_005251665.1 ( 463) ADRHREVDEDFPRGPKTYSSPGSFKTQKPSKPFHRSSHYHTSREDKSPKE 1
NP_115602.2 ( 463) ADRHREVDEDFPRGPKTYSSPGSFKTQKPSKPFHRSSHYHTSREDKSPKE 1
NP_001276050.1 ( 463) ADRHREVDEDFPRGPKTYSSPGSFKTQKPSKPFHRSSHYHTSREDKSPKE 1
NP_001276049.1 ( 463) ADRHREVDEDFPRGPKTYSSPGSFKTQKPSKPFHRSSHYHTSREDKSPKE 1
NP_001276048.1 ( 463) ADRHREVDEDFPRGPKTYSSPGSFKTQKPSKPFHRSSHYHTSREDKSPKE 1
XP_047285074.1 ( 106) KQYHQEIEEFVSNLVKRFEEQQKNDVEKTSFNLLPQPSSIVLEEDHKVEE 1
NP_060082.2 ( 106) KQYHQEIEEFVSNLVKRFEEQQKNDVEKTSFNLLPQPSSIVLEEDHKVEE 1
NP_001337865.1 ( 7) KQYHQEIEEFVSNLVKRFEEQQKNDVEKTSFNLLPQPSSIVLEEDHKVEE 1
NP_001337864.1 ( 106) KQYHQEIEEFVSNLVKRFEEQQKNDVEKTSFNLLPQPSSIVLEEDHKVEE 1
XP_047285073.1 ( 15) GQYHQEIEEFVSNLVKRFEEQQKNDVEKTSFNLLPQPSSIVLEEDHKVEE 1
//
--------------------------------------------------------------------------------
--------------------------------------------------------------------------------
	Motif ADRHREVDEDFPRGPKTYSSPGSFKTQKPSKPFHRSSHYHTSREDKSPKE MEME-2 position-specific scoring matrix
--------------------------------------------------------------------------------
log-odds matrix: alength= 20 w= 50 n= 22786 bayes= 8.67013 E= 3.4e-789
386 -330 -503 -525 -449 -34 -504 -423 75 -453 -379 -417 -520 -447 -450 -292 -276 -288 -482 -497
-518 -698 381 -416 -640 -494 -532 -698 -599 -689 -674 -362 -655 229 -618 -564 -523 -662 -631 -594
-606 -664 -688 -720 -260 -614 -467 -594 -540 -560 -560 -587 -705 -552 361 -700 -602 -604 -350 304
-734 -757 -725 -851 -655 -645 499 -818 -862 -756 -781 -686 -746 -687 -739 -821 -724 -797 -640 -601
-444 -585 -571 -509 -572 -511 -404 -517 -260 -508 -465 -434 -594 219 361 -554 -442 -519 -481 -495
-458 -636 -234 360 -555 -506 -503 -484 -633 -591 -530 -427 -684 -393 -591 -612 -505 -517 -546 -558
-345 -439 -678 -685 -390 -642 -703 255 -711 -274 -289 -624 -687 -669 -690 -671 -363 400 -631 -548
-302 -528 384 93 -443 -388 -357 -415 -425 -457 -401 -158 -512 -301 -446 -424 -363 -392 -447 -412
-458 -636 -234 360 -555 -506 -503 -484 -633 -591 -530 -427 -684 -393 -591 -612 -505 -517 -546 -558
-647 -722 382 -685 294 -604 -594 -697 -784 -668 -686 -551 -728 -687 -725 -725 -656 -698 -507 -386
-449 -516 -684 -719 474 -608 -481 -199 -723 -276 -299 -595 -677 -607 -658 -635 -476 215 -319 -176
-233 -490 -452 -471 -453 -405 -461 -435 -479 -436 -425 -439 352 -402 -460 76 -332 -392 -516 -505
-502 -642 -501 -575 -608 -513 -482 -618 -388 -604 -574 226 -642 -438 362 -578 -504 -611 -553 -548
-438 -631 -595 -701 -568 379 -638 -568 -708 156 -545 -558 -675 -658 -649 -599 -563 -573 -584 -603
-274 -522 -484 -503 -464 -445 -491 -374 -509 -437 -433 -477 353 -434 -490 -440 -366 200 -535 -520
-388 -510 -548 -545 -543 -500 -478 -423 341 -513 -437 -422 -560 -461 -160 -570 -420 -493 -452 -506
-402 -553 -595 -647 -565 -521 -566 -510 -506 -590 -489 -467 -637 -507 172 -407 414 -476 -566 -574
-560 -572 -661 -699 297 -619 -318 -455 -674 -420 -423 -507 -680 -525 -579 -628 -538 -475 -175 484
-316 -545 -374 144 -606 -422 -532 -622 -562 -631 -579 -381 -592 -454 -585 281 -404 -524 -617 -582
-316 -545 -374 144 -606 -422 -532 -622 -562 -631 -579 -381 -592 -454 -585 281 -404 -524 -617 -582
-306 -562 -492 -513 -493 -468 -500 -482 -517 -480 -475 -488 354 213 -499 -466 -394 -450 -548 -539
-390 -604 -518 -626 -605 379 -586 -639 -632 -665 -601 -474 -641 220 -588 -543 -521 -585 -565 -591
-350 -555 -499 -572 -601 -451 -515 -612 125 -609 -560 -417 -620 -460 -416 282 -404 -538 -585 -563
-585 -648 -625 -738 478 -596 -459 -561 -739 -524 -538 229 -707 -620 -666 -670 -598 -577 -324 -171
-525 -694 196 -497 -649 -506 -505 -660 309 -641 -611 -390 -657 -454 -418 -573 -510 -636 -608 -583
-284 -429 -566 -624 -432 -464 -564 -183 -589 -375 -332 -412 -584 -503 -552 -318 409 212 -527 -516
-308 -545 -269 124 -503 -462 -232 -442 -396 -397 -298 -344 -479 412 -372 -460 -366 -422 -435 -483
-388 -510 -548 -545 -543 -500 -478 -423 341 -513 -437 -422 -560 -461 -160 -570 -420 -493 -452 -506
-270 -525 -480 -501 -479 -437 -488 -462 -507 -464 -455 -471 353 -432 -488 -433 210 -423 -537 -529
-492 -657 -715 -832 -687 -571 -712 -765 -835 -744 -739 -679 -711 -737 -748 321 -533 -687 -657 -693
-594 -687 -680 -691 294 -607 -511 -597 310 -568 -566 -587 -709 -533 -473 -699 -595 -607 -421 -284
-357 -598 -495 -554 -537 -486 -529 -538 -566 -534 -531 220 353 -492 -548 -503 -437 -504 -578 -569
-435 -468 -624 -646 476 -588 -495 -206 -666 146 -173 -567 -607 -551 -609 -578 -475 -291 -279 -163
-619 -679 -678 -772 -386 -625 463 -474 -767 162 -434 -578 -717 -565 -647 -728 -619 -546 -482 -364
-612 -706 -708 -770 -686 -611 -632 -739 -583 -711 -714 -662 167 -617 364 -739 -648 -728 -624 -666
-302 -516 -530 -632 -594 -429 -589 -641 -633 -649 -596 -459 -616 230 -602 283 -410 -525 -606 -587
-309 -522 -642 -739 -629 -449 -661 -664 -768 -673 -621 -568 167 -646 -689 284 -434 -537 -628 -649
-423 -597 -539 -663 -505 -503 462 -671 -692 -638 -600 -444 -654 -497 -592 98 -502 -598 -539 -422
-470 -593 -657 -738 -179 -560 -416 -543 -725 -511 -512 -548 -685 -591 -639 97 -539 -538 -277 485
-587 -667 -687 -781 -404 -618 463 250 -761 -490 -506 -606 -722 -608 -667 -722 -608 -457 -491 -367
-284 -429 -566 -624 -432 -464 -564 -183 -589 -375 -332 -412 -584 -503 -552 -318 409 212 -527 -516
-324 -527 -665 -746 -485 -465 -650 -470 -753 161 -453 -587 -640 -639 -678 283 -432 -467 -573 -546
-482 -670 -474 141 -631 -541 -486 -595 -347 -580 -539 -477 -637 -386 360 -600 -497 -573 -566 -561
-458 -636 -234 360 -555 -506 -503 -484 -633 -591 -530 -427 -684 -393 -591 -612 -505 -517 -546 -558
-475 -616 414 -351 -544 -510 -491 -550 -639 -587 -549 -289 -651 -542 -593 -581 -524 -540 -533 -525
-482 -658 -572 -519 -566 -532 274 -559 308 -540 -494 -445 -639 -351 -272 -579 -466 -542 -527 -485
-350 -555 -499 -572 -601 -451 -515 -612 125 -609 -560 -417 -620 -460 -416 282 -404 -538 -585 -563
-274 -522 -484 -503 -464 -445 -491 -374 -509 -437 -433 -477 353 -434 -490 -440 -366 200 -535 -520
-385 -649 -337 143 -597 -480 -404 -507 304 -498 -443 -382 -567 -276 -247 -509 -403 -476 -530 -498
-458 -636 -234 360 -555 -506 -503 -484 -633 -591 -530 -427 -684 -393 -591 -612 -505 -517 -546 -558
--------------------------------------------------------------------------------
--------------------------------------------------------------------------------
	Motif ADRHREVDEDFPRGPKTYSSPGSFKTQKPSKPFHRSSHYHTSREDKSPKE MEME-2 position-specific probability matrix
--------------------------------------------------------------------------------
letter-probability matrix: alength= 20 w= 50 nsites= 23 E= 3.4e-789
0.782609 0.000000 0.000000 0.000000 0.000000 0.043478 0.000000 0.000000 0.173913 0.000000 0.000000 0.000000 0.000000 0.000000 0.000000 0.000000 0.000000 0.000000 0.000000 0.000000
0.000000 0.000000 0.782609 0.000000 0.000000 0.000000 0.000000 0.000000 0.000000 0.000000 0.000000 0.000000 0.000000 0.217391 0.000000 0.000000 0.000000 0.000000 0.000000 0.000000
0.000000 0.000000 0.000000 0.000000 0.000000 0.000000 0.000000 0.000000 0.000000 0.000000 0.000000 0.000000 0.000000 0.000000 0.782609 0.000000 0.000000 0.000000 0.000000 0.217391
0.000000 0.000000 0.000000 0.000000 0.000000 0.000000 1.000000 0.000000 0.000000 0.000000 0.000000 0.000000 0.000000 0.000000 0.000000 0.000000 0.000000 0.000000 0.000000 0.000000
0.000000 0.000000 0.000000 0.000000 0.000000 0.000000 0.000000 0.000000 0.000000 0.000000 0.000000 0.000000 0.000000 0.217391 0.782609 0.000000 0.000000 0.000000 0.000000 0.000000
0.000000 0.000000 0.000000 1.000000 0.000000 0.000000 0.000000 0.000000 0.000000 0.000000 0.000000 0.000000 0.000000 0.000000 0.000000 0.000000 0.000000 0.000000 0.000000 0.000000
0.000000 0.000000 0.000000 0.000000 0.000000 0.000000 0.000000 0.217391 0.000000 0.000000 0.000000 0.000000 0.000000 0.000000 0.000000 0.000000 0.000000 0.782609 0.000000 0.000000
0.000000 0.000000 0.782609 0.217391 0.000000 0.000000 0.000000 0.000000 0.000000 0.000000 0.000000 0.000000 0.000000 0.000000 0.000000 0.000000 0.000000 0.000000 0.000000 0.000000
0.000000 0.000000 0.000000 1.000000 0.000000 0.000000 0.000000 0.000000 0.000000 0.000000 0.000000 0.000000 0.000000 0.000000 0.000000 0.000000 0.000000 0.000000 0.000000 0.000000
0.000000 0.000000 0.782609 0.000000 0.217391 0.000000 0.000000 0.000000 0.000000 0.000000 0.000000 0.000000 0.000000 0.000000 0.000000 0.000000 0.000000 0.000000 0.000000 0.000000
0.000000 0.000000 0.000000 0.000000 0.782609 0.000000 0.000000 0.000000 0.000000 0.000000 0.000000 0.000000 0.000000 0.000000 0.000000 0.000000 0.000000 0.217391 0.000000 0.000000
0.000000 0.000000 0.000000 0.000000 0.000000 0.000000 0.000000 0.000000 0.000000 0.000000 0.000000 0.000000 0.782609 0.000000 0.000000 0.217391 0.000000 0.000000 0.000000 0.000000
0.000000 0.000000 0.000000 0.000000 0.000000 0.000000 0.000000 0.000000 0.000000 0.000000 0.000000 0.217391 0.000000 0.000000 0.782609 0.000000 0.000000 0.000000 0.000000 0.000000
0.000000 0.000000 0.000000 0.000000 0.000000 0.782609 0.000000 0.000000 0.000000 0.217391 0.000000 0.000000 0.000000 0.000000 0.000000 0.000000 0.000000 0.000000 0.000000 0.000000
0.000000 0.000000 0.000000 0.000000 0.000000 0.000000 0.000000 0.000000 0.000000 0.000000 0.000000 0.000000 0.782609 0.000000 0.000000 0.000000 0.000000 0.217391 0.000000 0.000000
0.000000 0.000000 0.000000 0.000000 0.000000 0.000000 0.000000 0.000000 1.000000 0.000000 0.000000 0.000000 0.000000 0.000000 0.000000 0.000000 0.000000 0.000000 0.000000 0.000000
0.000000 0.000000 0.000000 0.000000 0.000000 0.000000 0.000000 0.000000 0.000000 0.000000 0.000000 0.000000 0.000000 0.000000 0.217391 0.000000 0.782609 0.000000 0.000000 0.000000
0.000000 0.000000 0.000000 0.000000 0.217391 0.000000 0.000000 0.000000 0.000000 0.000000 0.000000 0.000000 0.000000 0.000000 0.000000 0.000000 0.000000 0.000000 0.000000 0.782609
0.000000 0.000000 0.000000 0.217391 0.000000 0.000000 0.000000 0.000000 0.000000 0.000000 0.000000 0.000000 0.000000 0.000000 0.000000 0.782609 0.000000 0.000000 0.000000 0.000000
0.000000 0.000000 0.000000 0.217391 0.000000 0.000000 0.000000 0.000000 0.000000 0.000000 0.000000 0.000000 0.000000 0.000000 0.000000 0.782609 0.000000 0.000000 0.000000 0.000000
0.000000 0.000000 0.000000 0.000000 0.000000 0.000000 0.000000 0.000000 0.000000 0.000000 0.000000 0.000000 0.782609 0.217391 0.000000 0.000000 0.000000 0.000000 0.000000 0.000000
0.000000 0.000000 0.000000 0.000000 0.000000 0.782609 0.000000 0.000000 0.000000 0.000000 0.000000 0.000000 0.000000 0.217391 0.000000 0.000000 0.000000 0.000000 0.000000 0.000000
0.000000 0.000000 0.000000 0.000000 0.000000 0.000000 0.000000 0.000000 0.217391 0.000000 0.000000 0.000000 0.000000 0.000000 0.000000 0.782609 0.000000 0.000000 0.000000 0.000000
0.000000 0.000000 0.000000 0.000000 0.782609 0.000000 0.000000 0.000000 0.000000 0.000000 0.000000 0.217391 0.000000 0.000000 0.000000 0.000000 0.000000 0.000000 0.000000 0.000000
0.000000 0.000000 0.217391 0.000000 0.000000 0.000000 0.000000 0.000000 0.782609 0.000000 0.000000 0.000000 0.000000 0.000000 0.000000 0.000000 0.000000 0.000000 0.000000 0.000000
0.000000 0.000000 0.000000 0.000000 0.000000 0.000000 0.000000 0.000000 0.000000 0.000000 0.000000 0.000000 0.000000 0.000000 0.000000 0.000000 0.782609 0.217391 0.000000 0.000000
0.000000 0.000000 0.000000 0.217391 0.000000 0.000000 0.000000 0.000000 0.000000 0.000000 0.000000 0.000000 0.000000 0.782609 0.000000 0.000000 0.000000 0.000000 0.000000 0.000000
0.000000 0.000000 0.000000 0.000000 0.000000 0.000000 0.000000 0.000000 1.000000 0.000000 0.000000 0.000000 0.000000 0.000000 0.000000 0.000000 0.000000 0.000000 0.000000 0.000000
0.000000 0.000000 0.000000 0.000000 0.000000 0.000000 0.000000 0.000000 0.000000 0.000000 0.000000 0.000000 0.782609 0.000000 0.000000 0.000000 0.217391 0.000000 0.000000 0.000000
0.000000 0.000000 0.000000 0.000000 0.000000 0.000000 0.000000 0.000000 0.000000 0.000000 0.000000 0.000000 0.000000 0.000000 0.000000 1.000000 0.000000 0.000000 0.000000 0.000000
0.000000 0.000000 0.000000 0.000000 0.217391 0.000000 0.000000 0.000000 0.782609 0.000000 0.000000 0.000000 0.000000 0.000000 0.000000 0.000000 0.000000 0.000000 0.000000 0.000000
0.000000 0.000000 0.000000 0.000000 0.000000 0.000000 0.000000 0.000000 0.000000 0.000000 0.000000 0.217391 0.782609 0.000000 0.000000 0.000000 0.000000 0.000000 0.000000 0.000000
0.000000 0.000000 0.000000 0.000000 0.782609 0.000000 0.000000 0.000000 0.000000 0.217391 0.000000 0.000000 0.000000 0.000000 0.000000 0.000000 0.000000 0.000000 0.000000 0.000000
0.000000 0.000000 0.000000 0.000000 0.000000 0.000000 0.782609 0.000000 0.000000 0.217391 0.000000 0.000000 0.000000 0.000000 0.000000 0.000000 0.000000 0.000000 0.000000 0.000000
0.000000 0.000000 0.000000 0.000000 0.000000 0.000000 0.000000 0.000000 0.000000 0.000000 0.000000 0.000000 0.217391 0.000000 0.782609 0.000000 0.000000 0.000000 0.000000 0.000000
0.000000 0.000000 0.000000 0.000000 0.000000 0.000000 0.000000 0.000000 0.000000 0.000000 0.000000 0.000000 0.000000 0.217391 0.000000 0.782609 0.000000 0.000000 0.000000 0.000000
0.000000 0.000000 0.000000 0.000000 0.000000 0.000000 0.000000 0.000000 0.000000 0.000000 0.000000 0.000000 0.217391 0.000000 0.000000 0.782609 0.000000 0.000000 0.000000 0.000000
0.000000 0.000000 0.000000 0.000000 0.000000 0.000000 0.782609 0.000000 0.000000 0.000000 0.000000 0.000000 0.000000 0.000000 0.000000 0.217391 0.000000 0.000000 0.000000 0.000000
0.000000 0.000000 0.000000 0.000000 0.000000 0.000000 0.000000 0.000000 0.000000 0.000000 0.000000 0.000000 0.000000 0.000000 0.000000 0.217391 0.000000 0.000000 0.000000 0.782609
0.000000 0.000000 0.000000 0.000000 0.000000 0.000000 0.782609 0.217391 0.000000 0.000000 0.000000 0.000000 0.000000 0.000000 0.000000 0.000000 0.000000 0.000000 0.000000 0.000000
0.000000 0.000000 0.000000 0.000000 0.000000 0.000000 0.000000 0.000000 0.000000 0.000000 0.000000 0.000000 0.000000 0.000000 0.000000 0.000000 0.782609 0.217391 0.000000 0.000000
0.000000 0.000000 0.000000 0.000000 0.000000 0.000000 0.000000 0.000000 0.000000 0.217391 0.000000 0.000000 0.000000 0.000000 0.000000 0.782609 0.000000 0.000000 0.000000 0.000000
0.000000 0.000000 0.000000 0.217391 0.000000 0.000000 0.000000 0.000000 0.000000 0.000000 0.000000 0.000000 0.000000 0.000000 0.782609 0.000000 0.000000 0.000000 0.000000 0.000000
0.000000 0.000000 0.000000 1.000000 0.000000 0.000000 0.000000 0.000000 0.000000 0.000000 0.000000 0.000000 0.000000 0.000000 0.000000 0.000000 0.000000 0.000000 0.000000 0.000000
0.000000 0.000000 1.000000 0.000000 0.000000 0.000000 0.000000 0.000000 0.000000 0.000000 0.000000 0.000000 0.000000 0.000000 0.000000 0.000000 0.000000 0.000000 0.000000 0.000000
0.000000 0.000000 0.000000 0.000000 0.000000 0.000000 0.217391 0.000000 0.782609 0.000000 0.000000 0.000000 0.000000 0.000000 0.000000 0.000000 0.000000 0.000000 0.000000 0.000000
0.000000 0.000000 0.000000 0.000000 0.000000 0.000000 0.000000 0.000000 0.217391 0.000000 0.000000 0.000000 0.000000 0.000000 0.000000 0.782609 0.000000 0.000000 0.000000 0.000000
0.000000 0.000000 0.000000 0.000000 0.000000 0.000000 0.000000 0.000000 0.000000 0.000000 0.000000 0.000000 0.782609 0.000000 0.000000 0.000000 0.000000 0.217391 0.000000 0.000000
0.000000 0.000000 0.000000 0.217391 0.000000 0.000000 0.000000 0.000000 0.782609 0.000000 0.000000 0.000000 0.000000 0.000000 0.000000 0.000000 0.000000 0.000000 0.000000 0.000000
0.000000 0.000000 0.000000 1.000000 0.000000 0.000000 0.000000 0.000000 0.000000 0.000000 0.000000 0.000000 0.000000 0.000000 0.000000 0.000000 0.000000 0.000000 0.000000 0.000000
--------------------------------------------------------------------------------
--------------------------------------------------------------------------------
	Motif ADRHREVDEDFPRGPKTYSSPGSFKTQKPSKPFHRSSHYHTSREDKSPKE MEME-2 regular expression
--------------------------------------------------------------------------------
A[DQ][RY]H[RQ]E[VI][DE]E[DF][FV][PS][RN][GL][PV]K[TR][YF][SE][SE][PQ][GQ][SK][FN][KD][TV][QE]K[PT]S[KF][PN][FL][HL][RP][SQ][SP][HS][YS][HI][TV][SL][RE]ED[KH][SK][PV][KE]E
--------------------------------------------------------------------------------
Time 32.83 secs.
********************************************************************************
********************************************************************************
MOTIF NKNIICRNCGKRGHLSKBCPLPRKVRRCF MEME-3	width = 29 sites = 48 llr = 2321 E-value = 8.8e-593
********************************************************************************
--------------------------------------------------------------------------------
	Motif NKNIICRNCGKRGHLSKBCPLPRKVRRCF MEME-3 Description
--------------------------------------------------------------------------------
Simplified A ::1:::::::1::::31:::121:12:1:
pos.-specific C :::::a::a:1:::::::a::::::::4:
probability D :::::::::4::1::::5:1::::1:1::
matrix E ::::::::::121:::1::::1:1:::::
F ::::::3:::::::2::::2:::::1::4
G 11::1::::5::8:1::::::::22:::1
H :::11::1:::::a:::::::::::::::
I :::44::1:::::::1:::::1:::::1:
K 241:::22::52::116::1:::4112::
L :1:1:::1:::1::4:::::4:1::::::
M :::1:::::::::::1::::3::1:::1:
N 416::::5:::::::::4::1::11:1:1
P :2:1:::::::1:::::::7:52:::::1
Q ::::::::::::::1:1:::12:::11::
R 1:::1:4::1:4::11::::::5::451:
S 1:::1:1:::1:::141:::::2:1:::3
T ::121::::::1:::::1:::::1:2:::
V 1:::1:::::::::::::::::::4::1:
W :::::::::::::::::::::::::::::
Y ::::::11::::::1::::::::::::2:
bits 6.5
5.8
5.2 * * *
4.5 * * * *
Relative 3.9 * * * *
Entropy 3.2 * * ** *
(69.8 bits) 2.6 * * *** ** ***
1.9 * ******** ** ******* ****
1.3 *****************************
0.6 *****************************
0.0 -----------------------------
Multilevel NKNIICRNCGKRGHLSKDCPLPRKVRRCF
consensus F D A N M S
sequence
--------------------------------------------------------------------------------
--------------------------------------------------------------------------------
	Motif NKNIICRNCGKRGHLSKBCPLPRKVRRCF MEME-3 sites sorted by position p-value
--------------------------------------------------------------------------------
Sequence name Start P-value Site
------------- ----- --------- -----------------------------
XP_047279916.1 40 1.65e-34 GRWTQRYYSA NKNIICRNCDKRGHLSKNCPLPRKVRRCF LCSRRGHLLY
XP_047279915.1 40 1.65e-34 GRWTQRYYSA NKNIICRNCDKRGHLSKNCPLPRKVRRCF LCSRRGHLLY
XP_047279914.1 238 1.65e-34 GRWTQRYYSA NKNIICRNCDKRGHLSKNCPLPRKVRRCF LCSRRGHLLY
XP_047279913.1 238 1.65e-34 GRWTQRYYSA NKNIICRNCDKRGHLSKNCPLPRKVRRCF LCSRRGHLLY
XP_024303459.1 40 1.65e-34 GRWTQRYYSA NKNIICRNCDKRGHLSKNCPLPRKVRRCF LCSRRGHLLY
XP_016870689.1 40 1.65e-34 GRWTQRYYSA NKNIICRNCDKRGHLSKNCPLPRKVRRCF LCSRRGHLLY
XP_016870688.1 40 1.65e-34 GRWTQRYYSA NKNIICRNCDKRGHLSKNCPLPRKVRRCF LCSRRGHLLY
XP_016870687.1 238 1.65e-34 GRWTQRYYSA NKNIICRNCDKRGHLSKNCPLPRKVRRCF LCSRRGHLLY
XP_016870686.1 238 1.65e-34 GRWTQRYYSA NKNIICRNCDKRGHLSKNCPLPRKVRRCF LCSRRGHLLY
XP_011516353.1 44 1.65e-34 GRWTQRYYSA NKNIICRNCDKRGHLSKNCPLPRKVRRCF LCSRRGHLLY
XP_011516352.1 238 1.65e-34 GRWTQRYYSA NKNIICRNCDKRGHLSKNCPLPRKVRRCF LCSRRGHLLY
XP_005251669.1 238 1.65e-34 GRWTQRYYSA NKNIICRNCDKRGHLSKNCPLPRKVRRCF LCSRRGHLLY
XP_005251665.1 238 1.65e-34 GRWTQRYYSA NKNIICRNCDKRGHLSKNCPLPRKVRRCF LCSRRGHLLY
NP_115602.2 238 1.65e-34 GRWTQRYYSA NKNIICRNCDKRGHLSKNCPLPRKVRRCF LCSRRGHLLY
NP_001276050.1 238 1.65e-34 GRWTQRYYSA NKNIICRNCDKRGHLSKNCPLPRKVRRCF LCSRRGHLLY
NP_001276049.1 238 1.65e-34 GRWTQRYYSA NKNIICRNCDKRGHLSKNCPLPRKVRRCF LCSRRGHLLY
NP_001276048.1 238 1.65e-34 GRWTQRYYSA NKNIICRNCDKRGHLSKNCPLPRKVRRCF LCSRRGHLLY
XP_047278464.1 128 2.18e-23 YTGQKITLEA VLNTTCKKCGCKGHFAKDCFMQPGGTKYS LIPDEEEEKE
NP_057589.2 128 2.18e-23 YTGQKITLEA VLNTTCKKCGCKGHFAKDCFMQPGGTKYS LIPDEEEEKE
NP_001269500.1 66 2.18e-23 YTGQKITLEA VLNTTCKKCGCKGHFAKDCFMQPGGTKYS LIPDEEEEKE
NP_001269499.1 104 2.18e-23 YTGQKITLEA VLNTTCKKCGCKGHFAKDCFMQPGGTKYS LIPDEEEEKE
NP_001269498.1 120 2.18e-23 YTGQKITLEA VLNTTCKKCGCKGHFAKDCFMQPGGTKYS LIPDEEEEKE
NP_001269497.1 128 2.18e-23 YTGQKITLEA VLNTTCKKCGCKGHFAKDCFMQPGGTKYS LIPDEEEEKE
NP_001269495.1 150 2.18e-23 YTGQKITLEA VLNTTCKKCGCKGHFAKDCFMQPGGTKYS LIPDEEEEKE
XP_047285074.1 224 2.32e-21 EGQEIQVKAK RPKPHCFNCGSEEHQMKDCPMPRNAARIS EKRKEYMDAC
XP_047285073.1 133 2.32e-21 EGQEIQVKAK RPKPHCFNCGSEEHQMKDCPMPRNAARIS EKRKEYMDAC
NP_060082.2 224 2.32e-21 EGQEIQVKAK RPKPHCFNCGSEEHQMKDCPMPRNAARIS EKRKEYMDAC
NP_001337865.1 125 2.32e-21 EGQEIQVKAK RPKPHCFNCGSEEHQMKDCPMPRNAARIS EKRKEYMDAC
XP_047273784.1 125 8.41e-20 GRRLKRQAAK KNAMVCFHCRKPGHGIADCPAALENQDMG TGICYRCGST
XP_047273783.1 125 8.41e-20 GRRLKRQAAK KNAMVCFHCRKPGHGIADCPAALENQDMG TGICYRCGST
NP_115656.1 125 8.41e-20 GRRLKRQAAK KNAMVCFHCRKPGHGIADCPAALENQDMG TGICYRCGST
NP_001124508.1 125 8.41e-20 GRRLKRQAAK KNAMVCFHCRKPGHGIADCPAALENQDMG TGICYRCGST
NP_001124507.1 125 8.41e-20 GRRLKRQAAK KNAMVCFHCRKPGHGIADCPAALENQDMG TGICYRCGST
XP_016878571.1 867 1.05e-17 GSSNGSSHKK SGNLSCYNCGATGHRAQDCKQPSMDFNRP GKRAPWPRPP
XP_005255915.3 1040 1.05e-17 GSSNGSSHKK SGNLSCYNCGATGHRAQDCKQPSMDFNRP GKRAPWPRPP
NP_055959.2 1040 1.05e-17 GSSNGSSHKK SGNLSCYNCGATGHRAQDCKQPSMDFNRP GTFRLKYAPP
XP_011529314.1 344 4.74e-17 PGNIRRARKR KYTTRCSYCGEEGHSKETCDNESNKAQVF ENLIITLQEL
NP_001137450.1 344 4.74e-17 PGNIRRARKR KYTTRCSYCGEEGHSKETCDNESNKAQVF ENLIITLQEL
NP_776159.1 342 6.58e-17 PGEMRRARKR KHTIRCSYCGEEGHSKETCDNESDKAQVF ENLIITLQEL
NP_001299820.1 342 6.58e-17 PGEMRRARKR KHTIRCSYCGEEGHSKETCDNESDKAQVF ENLIITLQEL
XP_011537754.1 59 2.78e-16 SEARKPSKRP PPNYLCHLCFNKGHYIKDCPQARPKGEGL TPYQGKKRCF
NP_699198.2 129 2.78e-16 SEARKPSKRP PPNYLCHLCFNKGHYIKDCPQARPKGEGL TPYQGKKRCF
NP_060212.4 1128 9.60e-16 ANTSGSGPKK NGNVSCYNCGVSGHYAQDCKQSSMEANQQ GTYRLRYAPP
XP_016863618.1 356 3.99e-15 HCAVPDHSCE GPKHGCFICGELDHKRSTCPNIATSKRAN KAVRKQKQRK
XP_011512137.1 455 3.99e-15 HCAVPDHSCE GPKHGCFICGELDHKRSTCPNIATSKRAN KAVRKQKQRK
NP_079212.2 440 3.99e-15 HCAVPDHSCE GPKHGCFICGELDHKRSTCPNIATSKRAN KAVRKQKQRK
NP_149080.2 367 3.69e-14 GEEGHLSPYC RKGIVCNLCGKRGHAFAQCPKAVHNSVAA QLTGVAGH
NP_001269496.1 130 4.24e-14 PLPFPRFSPC GWTLFWKKEAAQCHFAKDCFMQPGGTKYS LIPDEEEEKE
--------------------------------------------------------------------------------
--------------------------------------------------------------------------------
	Motif NKNIICRNCGKRGHLSKBCPLPRKVRRCF MEME-3 block diagrams
--------------------------------------------------------------------------------
SEQUENCE NAME POSITION P-VALUE MOTIF DIAGRAM
------------- ---------------- -------------
XP_047279916.1 1.6e-34 39_[3]_277
XP_047279915.1 1.6e-34 39_[3]_277
XP_047279914.1 1.6e-34 237_[3]_245
XP_047279913.1 1.6e-34 237_[3]_245
XP_024303459.1 1.6e-34 39_[3]_277
XP_016870689.1 1.6e-34 39_[3]_277
XP_016870688.1 1.6e-34 39_[3]_277
XP_016870687.1 1.6e-34 237_[3]_245
XP_016870686.1 1.6e-34 237_[3]_245
XP_011516353.1 1.6e-34 43_[3]_277
XP_011516352.1 1.6e-34 237_[3]_245
XP_005251669.1 1.6e-34 237_[3]_277
XP_005251665.1 1.6e-34 237_[3]_277
NP_115602.2 1.6e-34 237_[3]_277
NP_001276050.1 1.6e-34 237_[3]_277
NP_001276049.1 1.6e-34 237_[3]_277
NP_001276048.1 1.6e-34 237_[3]_277
XP_047278464.1 2.2e-23 127_[3]_85
NP_057589.2 2.2e-23 127_[3]_85
NP_001269500.1 2.2e-23 65_[3]_85
NP_001269499.1 2.2e-23 103_[3]_85
NP_001269498.1 2.2e-23 119_[3]_85
NP_001269497.1 2.2e-23 127_[3]_85
NP_001269495.1 2.2e-23 149_[3]_85
XP_047285074.1 2.3e-21 223_[3]_197
XP_047285073.1 2.3e-21 132_[3]_455
NP_060082.2 2.3e-21 223_[3]_455
NP_001337865.1 2.3e-21 124_[3]_455
XP_047273784.1 8.4e-20 124_[3]_118
XP_047273783.1 8.4e-20 124_[3]_118
NP_115656.1 8.4e-20 124_[3]_118
NP_001124508.1 8.4e-20 124_[3]_118
NP_001124507.1 8.4e-20 124_[3]_118
XP_016878571.1 1e-17 866_[3]_31
XP_005255915.3 1e-17 1039_[3]_31
NP_055959.2 1e-17 1039_[3]_18
XP_011529314.1 4.7e-17 343_[3]_31
NP_001137450.1 4.7e-17 343_[3]_31
NP_776159.1 6.6e-17 341_[3]_32
NP_001299820.1 6.6e-17 341_[3]_32
XP_011537754.1 2.8e-16 58_[3]_84
NP_699198.2 2.8e-16 128_[3]_84
NP_060212.4 9.6e-16 1127_[3]_22
XP_016863618.1 4e-15 355_[3]_45
XP_011512137.1 4e-15 454_[3]_45
NP_079212.2 4e-15 439_[3]_45
NP_149080.2 3.7e-14 366_[3]_8
NP_001269496.1 4.2e-14 129_[3]_85
--------------------------------------------------------------------------------
--------------------------------------------------------------------------------
	Motif NKNIICRNCGKRGHLSKBCPLPRKVRRCF MEME-3 in BLOCKS format
--------------------------------------------------------------------------------
BL MOTIF NKNIICRNCGKRGHLSKBCPLPRKVRRCF width=29 seqs=48
XP_047279916.1 ( 40) NKNIICRNCDKRGHLSKNCPLPRKVRRCF 1
XP_047279915.1 ( 40) NKNIICRNCDKRGHLSKNCPLPRKVRRCF 1
XP_047279914.1 ( 238) NKNIICRNCDKRGHLSKNCPLPRKVRRCF 1
XP_047279913.1 ( 238) NKNIICRNCDKRGHLSKNCPLPRKVRRCF 1
XP_024303459.1 ( 40) NKNIICRNCDKRGHLSKNCPLPRKVRRCF 1
XP_016870689.1 ( 40) NKNIICRNCDKRGHLSKNCPLPRKVRRCF 1
XP_016870688.1 ( 40) NKNIICRNCDKRGHLSKNCPLPRKVRRCF 1
XP_016870687.1 ( 238) NKNIICRNCDKRGHLSKNCPLPRKVRRCF 1
XP_016870686.1 ( 238) NKNIICRNCDKRGHLSKNCPLPRKVRRCF 1
XP_011516353.1 ( 44) NKNIICRNCDKRGHLSKNCPLPRKVRRCF 1
XP_011516352.1 ( 238) NKNIICRNCDKRGHLSKNCPLPRKVRRCF 1
XP_005251669.1 ( 238) NKNIICRNCDKRGHLSKNCPLPRKVRRCF 1
XP_005251665.1 ( 238) NKNIICRNCDKRGHLSKNCPLPRKVRRCF 1
NP_115602.2 ( 238) NKNIICRNCDKRGHLSKNCPLPRKVRRCF 1
NP_001276050.1 ( 238) NKNIICRNCDKRGHLSKNCPLPRKVRRCF 1
NP_001276049.1 ( 238) NKNIICRNCDKRGHLSKNCPLPRKVRRCF 1
NP_001276048.1 ( 238) NKNIICRNCDKRGHLSKNCPLPRKVRRCF 1
XP_047278464.1 ( 128) VLNTTCKKCGCKGHFAKDCFMQPGGTKYS 1
NP_057589.2 ( 128) VLNTTCKKCGCKGHFAKDCFMQPGGTKYS 1
NP_001269500.1 ( 66) VLNTTCKKCGCKGHFAKDCFMQPGGTKYS 1
NP_001269499.1 ( 104) VLNTTCKKCGCKGHFAKDCFMQPGGTKYS 1
NP_001269498.1 ( 120) VLNTTCKKCGCKGHFAKDCFMQPGGTKYS 1
NP_001269497.1 ( 128) VLNTTCKKCGCKGHFAKDCFMQPGGTKYS 1
NP_001269495.1 ( 150) VLNTTCKKCGCKGHFAKDCFMQPGGTKYS 1
XP_047285074.1 ( 224) RPKPHCFNCGSEEHQMKDCPMPRNAARIS 1
XP_047285073.1 ( 133) RPKPHCFNCGSEEHQMKDCPMPRNAARIS 1
NP_060082.2 ( 224) RPKPHCFNCGSEEHQMKDCPMPRNAARIS 1
NP_001337865.1 ( 125) RPKPHCFNCGSEEHQMKDCPMPRNAARIS 1
XP_047273784.1 ( 125) KNAMVCFHCRKPGHGIADCPAALENQDMG 1
XP_047273783.1 ( 125) KNAMVCFHCRKPGHGIADCPAALENQDMG 1
NP_115656.1 ( 125) KNAMVCFHCRKPGHGIADCPAALENQDMG 1
NP_001124508.1 ( 125) KNAMVCFHCRKPGHGIADCPAALENQDMG 1
NP_001124507.1 ( 125) KNAMVCFHCRKPGHGIADCPAALENQDMG 1
XP_016878571.1 ( 867) SGNLSCYNCGATGHRAQDCKQPSMDFNRP 1
XP_005255915.3 ( 1040) SGNLSCYNCGATGHRAQDCKQPSMDFNRP 1
NP_055959.2 ( 1040) SGNLSCYNCGATGHRAQDCKQPSMDFNRP 1
XP_011529314.1 ( 344) KYTTRCSYCGEEGHSKETCDNESNKAQVF 1
NP_001137450.1 ( 344) KYTTRCSYCGEEGHSKETCDNESNKAQVF 1
NP_776159.1 ( 342) KHTIRCSYCGEEGHSKETCDNESDKAQVF 1
NP_001299820.1 ( 342) KHTIRCSYCGEEGHSKETCDNESDKAQVF 1
XP_011537754.1 ( 59) PPNYLCHLCFNKGHYIKDCPQARPKGEGL 1
NP_699198.2 ( 129) PPNYLCHLCFNKGHYIKDCPQARPKGEGL 1
NP_060212.4 ( 1128) NGNVSCYNCGVSGHYAQDCKQSSMEANQQ 1
XP_016863618.1 ( 356) GPKHGCFICGELDHKRSTCPNIATSKRAN 1
XP_011512137.1 ( 455) GPKHGCFICGELDHKRSTCPNIATSKRAN 1
NP_079212.2 ( 440) GPKHGCFICGELDHKRSTCPNIATSKRAN 1
NP_149080.2 ( 367) RKGIVCNLCGKRGHAFAQCPKAVHNSVAA 1
NP_001269496.1 ( 130) GWTLFWKKEAAQCHFAKDCFMQPGGTKYS 1
//
--------------------------------------------------------------------------------
--------------------------------------------------------------------------------
	Motif NKNIICRNCGKRGHLSKBCPLPRKVRRCF MEME-3 position-specific scoring matrix
--------------------------------------------------------------------------------
log-odds matrix: alength= 20 w= 29 n= 24214 bayes= 8.55974 E= 8.8e-593
-379 -624 -374 -405 -550 51 -381 -504 107 -500 -437 304 -74 -305 77 -77 -370 156 -530 -469
-325 -573 -366 -360 -386 49 39 -419 199 97 -369 122 138 -282 -279 -417 -327 -400 83 63
100 -587 -314 -474 -621 -125 -440 -657 66 -666 -613 380 -603 -450 -514 -422 123 -579 -654 -548
-255 -374 -558 -520 -241 -443 89 336 -514 37 235 -433 19 -424 -464 -439 201 -42 -339 62
-253 -372 -553 -515 -22 5 129 313 -508 -40 -169 -429 -525 -420 30 -43 166 146 -337 -302
-351 498 -555 -553 -444 -535 -527 -385 -622 -465 -384 -507 -607 -535 -530 -548 -376 -443 -135 -523
-452 -658 -549 -481 308 -538 40 -520 94 -505 -454 -97 -638 -322 246 -41 -435 -505 -446 162
-471 -625 -535 -532 -277 -549 169 69 90 -17 -434 352 -661 -386 -329 -562 -454 -460 -363 168
-340 497 -545 -410 -435 -527 -518 -374 -612 -455 -373 -497 -598 -525 -521 -538 -366 -433 -528 -516
-108 -575 265 -482 52 303 -454 -657 -531 -672 -617 -258 -607 -470 69 -424 -401 -571 -644 -537
70 211 -316 83 -435 -375 -333 -412 231 -419 -345 3 -477 -254 -298 -36 -278 -107 -461 -389
-332 -597 -410 100 -500 -452 -356 -449 108 -21 -378 -338 54 -72 251 -214 49 -423 -484 -430
-248 -117 -37 -56 -483 390 -448 -480 -471 -543 -436 -309 -531 -460 -431 -402 -406 -442 -432 -459
-874 -882 -860 -997 -822 -759 500 -963 -994 -898 -959 -884 -862 -901 -896 -975 -867 -944 -777 -814
-86 -477 -319 -286 241 76 -309 -292 -38 218 -263 -270 -452 93 4 -38 -245 -279 -397 112
217 -415 -466 -424 -31 -432 -391 190 -12 -262 203 -378 -519 -338 -2 160 -273 -200 -372 -332
121 -668 -375 16 -610 -503 -420 -522 278 -515 -453 -394 -593 95 -272 -81 -409 -489 -560 -514
-447 -666 308 -434 -619 -371 -405 -691 -499 -694 -662 300 -598 -97 -544 -416 169 -657 -664 -523
-405 500 -603 -606 -496 -577 -577 -440 -673 -518 -439 -558 -652 -586 -581 -601 -430 -497 -581 -574
-258 -533 33 -457 226 -435 -451 -432 -36 -433 -425 -416 335 -393 -452 -414 -344 -401 -519 -474
97 -500 -478 -440 -375 -469 -405 -289 -155 225 358 167 -568 147 -290 -468 -336 -293 -441 -402
143 -519 -416 -19 -447 -427 -448 42 -451 -421 -411 -430 305 163 -443 -224 -332 -386 -525 -502
41 -472 -658 -643 -531 -420 -595 -466 -543 54 -457 -539 127 -525 289 63 -377 -104 -585 -572
-236 -525 -28 40 -399 142 -48 -384 185 -390 195 146 -75 -223 -294 -327 52 -352 -432 -351
67 -592 27 -156 -490 148 -352 -491 44 -497 -428 153 -515 -312 -393 -71 -319 281 -526 -430
176 -540 -330 -294 103 -47 -315 -394 -31 -398 -325 -278 -470 124 238 -198 183 -364 -440 -372
-396 -643 86 -84 -575 -495 -391 -498 94 -490 -427 90 -590 95 293 -495 -390 -114 -525 -481
69 338 -554 -516 -240 -50 -425 123 -509 -215 235 -429 -526 -104 -10 -436 -257 97 -337 253
-95 -502 -360 -439 388 85 -432 -409 -464 -73 -399 57 -15 -95 -475 117 -339 -384 -525 -461
--------------------------------------------------------------------------------
--------------------------------------------------------------------------------
	Motif NKNIICRNCGKRGHLSKBCPLPRKVRRCF MEME-3 position-specific probability matrix
--------------------------------------------------------------------------------
letter-probability matrix: alength= 20 w= 29 nsites= 48 E= 8.8e-593
0.000000 0.000000 0.000000 0.000000 0.000000 0.083333 0.000000 0.000000 0.187500 0.000000 0.000000 0.375000 0.041667 0.000000 0.104167 0.062500 0.000000 0.145833 0.000000 0.000000
0.000000 0.000000 0.000000 0.000000 0.000000 0.083333 0.041667 0.000000 0.375000 0.145833 0.000000 0.104167 0.187500 0.000000 0.000000 0.000000 0.000000 0.000000 0.020833 0.041667
0.104167 0.000000 0.000000 0.000000 0.000000 0.020833 0.000000 0.000000 0.145833 0.000000 0.000000 0.625000 0.000000 0.000000 0.000000 0.000000 0.104167 0.000000 0.000000 0.000000
0.000000 0.000000 0.000000 0.000000 0.000000 0.000000 0.062500 0.416667 0.000000 0.083333 0.104167 0.000000 0.083333 0.000000 0.000000 0.000000 0.187500 0.020833 0.000000 0.041667
0.000000 0.000000 0.000000 0.000000 0.020833 0.062500 0.083333 0.354167 0.000000 0.041667 0.000000 0.000000 0.000000 0.000000 0.083333 0.083333 0.145833 0.125000 0.000000 0.000000
0.000000 0.979167 0.000000 0.000000 0.000000 0.000000 0.000000 0.000000 0.000000 0.000000 0.000000 0.000000 0.000000 0.000000 0.000000 0.000000 0.000000 0.000000 0.020833 0.000000
0.000000 0.000000 0.000000 0.000000 0.250000 0.000000 0.041667 0.000000 0.166667 0.000000 0.000000 0.020833 0.000000 0.000000 0.354167 0.083333 0.000000 0.000000 0.000000 0.083333
0.000000 0.000000 0.000000 0.000000 0.000000 0.000000 0.104167 0.062500 0.166667 0.062500 0.000000 0.520833 0.000000 0.000000 0.000000 0.000000 0.000000 0.000000 0.000000 0.083333
0.000000 0.979167 0.000000 0.020833 0.000000 0.000000 0.000000 0.000000 0.000000 0.000000 0.000000 0.000000 0.000000 0.000000 0.000000 0.000000 0.000000 0.000000 0.000000 0.000000
0.020833 0.000000 0.354167 0.000000 0.041667 0.479167 0.000000 0.000000 0.000000 0.000000 0.000000 0.000000 0.000000 0.000000 0.104167 0.000000 0.000000 0.000000 0.000000 0.000000
0.083333 0.145833 0.000000 0.145833 0.000000 0.000000 0.000000 0.000000 0.479167 0.000000 0.000000 0.041667 0.000000 0.000000 0.000000 0.083333 0.000000 0.020833 0.000000 0.000000
0.000000 0.000000 0.000000 0.166667 0.000000 0.000000 0.000000 0.000000 0.187500 0.062500 0.000000 0.000000 0.104167 0.020833 0.375000 0.020833 0.062500 0.000000 0.000000 0.000000
0.000000 0.020833 0.062500 0.083333 0.000000 0.833333 0.000000 0.000000 0.000000 0.000000 0.000000 0.000000 0.000000 0.000000 0.000000 0.000000 0.000000 0.000000 0.000000 0.000000
0.000000 0.000000 0.000000 0.000000 0.000000 0.000000 1.000000 0.000000 0.000000 0.000000 0.000000 0.000000 0.000000 0.000000 0.000000 0.000000 0.000000 0.000000 0.000000 0.000000
0.020833 0.000000 0.000000 0.000000 0.166667 0.104167 0.000000 0.000000 0.062500 0.354167 0.000000 0.000000 0.000000 0.083333 0.062500 0.083333 0.000000 0.000000 0.000000 0.062500
0.250000 0.000000 0.000000 0.000000 0.020833 0.000000 0.000000 0.145833 0.083333 0.000000 0.083333 0.000000 0.000000 0.000000 0.062500 0.354167 0.000000 0.000000 0.000000 0.000000
0.125000 0.000000 0.000000 0.083333 0.000000 0.000000 0.000000 0.000000 0.645833 0.000000 0.000000 0.000000 0.000000 0.083333 0.000000 0.062500 0.000000 0.000000 0.000000 0.000000
0.000000 0.000000 0.479167 0.000000 0.000000 0.000000 0.000000 0.000000 0.000000 0.000000 0.000000 0.354167 0.000000 0.020833 0.000000 0.000000 0.145833 0.000000 0.000000 0.000000
0.000000 1.000000 0.000000 0.000000 0.000000 0.000000 0.000000 0.000000 0.000000 0.000000 0.000000 0.000000 0.000000 0.000000 0.000000 0.000000 0.000000 0.000000 0.000000 0.000000
0.000000 0.000000 0.083333 0.000000 0.166667 0.000000 0.000000 0.000000 0.083333 0.000000 0.000000 0.000000 0.666667 0.000000 0.000000 0.000000 0.000000 0.000000 0.000000 0.000000
0.104167 0.000000 0.000000 0.000000 0.000000 0.000000 0.000000 0.000000 0.020833 0.354167 0.250000 0.145833 0.000000 0.125000 0.000000 0.000000 0.000000 0.000000 0.000000 0.000000
0.166667 0.000000 0.000000 0.083333 0.000000 0.000000 0.000000 0.062500 0.000000 0.000000 0.000000 0.000000 0.500000 0.166667 0.000000 0.020833 0.000000 0.000000 0.000000 0.000000
0.062500 0.000000 0.000000 0.000000 0.000000 0.000000 0.000000 0.000000 0.000000 0.104167 0.000000 0.000000 0.166667 0.000000 0.479167 0.166667 0.000000 0.020833 0.000000 0.000000
0.000000 0.000000 0.041667 0.104167 0.000000 0.166667 0.020833 0.000000 0.354167 0.000000 0.083333 0.125000 0.041667 0.000000 0.000000 0.000000 0.062500 0.000000 0.000000 0.000000
0.083333 0.000000 0.062500 0.020833 0.000000 0.166667 0.000000 0.000000 0.125000 0.000000 0.000000 0.125000 0.000000 0.000000 0.000000 0.062500 0.000000 0.354167 0.000000 0.000000
0.187500 0.000000 0.000000 0.000000 0.062500 0.041667 0.000000 0.000000 0.062500 0.000000 0.000000 0.000000 0.000000 0.104167 0.354167 0.020833 0.166667 0.000000 0.000000 0.000000
0.000000 0.000000 0.104167 0.041667 0.000000 0.000000 0.000000 0.000000 0.166667 0.000000 0.000000 0.083333 0.000000 0.083333 0.500000 0.000000 0.000000 0.020833 0.000000 0.000000
0.083333 0.354167 0.000000 0.000000 0.000000 0.041667 0.000000 0.083333 0.000000 0.000000 0.104167 0.000000 0.000000 0.020833 0.062500 0.000000 0.000000 0.083333 0.000000 0.166667
0.020833 0.000000 0.000000 0.000000 0.437500 0.104167 0.000000 0.000000 0.000000 0.041667 0.000000 0.062500 0.062500 0.020833 0.000000 0.250000 0.000000 0.000000 0.000000 0.000000
--------------------------------------------------------------------------------
--------------------------------------------------------------------------------
	Motif NKNIICRNCGKRGHLSKBCPLPRKVRRCF MEME-3 regular expression
--------------------------------------------------------------------------------
NKNIIC[RF]NC[GD]KRGHL[SA]K[DN]CP[LM]PRKVRRC[FS]
--------------------------------------------------------------------------------
Time 47.89 secs.
********************************************************************************
********************************************************************************
MOTIF AANENPHHDIRKGRASWKSNRWPQENKETQKEMKNKNRNWE MEME-4	width = 41 sites = 18 llr = 2193 E-value = 4.0e-688
********************************************************************************
--------------------------------------------------------------------------------
	Motif AANENPHHDIRKGRASWKSNRWPQENKETQKEMKNKNRNWE MEME-4 Description
--------------------------------------------------------------------------------
Simplified A aa::::::::::::a::::::::::::::::::::::::::
pos.-specific C :::::::::::::::::::::::::::::::::::::::::
probability D ::::::::a::::::::::::::::::::::::::::::::
matrix E :::a::::::::::::::::::::a::a:::a::::::::a
F :::::::::::::::::::::::::::::::::::::::::
G ::::::::::::a::::::::::::::::::::::::::::
H ::::::aa:::::::::::::::::::::::::::::::::
I :::::::::a:::::::::::::::::::::::::::::::
K :::::::::::a:::::a::::::::a:::a::a:a:::::
L :::::::::::::::::::::::::::::::::::::::::
M ::::::::::::::::::::::::::::::::a::::::::
N ::a:a::::::::::::::a:::::a::::::::a:a:a::
P :::::a::::::::::::::::a::::::::::::::::::
Q :::::::::::::::::::::::a:::::a:::::::::::
R ::::::::::a::a::::::a::::::::::::::::a:::
S :::::::::::::::a::a::::::::::::::::::::::
T ::::::::::::::::::::::::::::a::::::::::::
V :::::::::::::::::::::::::::::::::::::::::
W ::::::::::::::::a::::a:::::::::::::::::a:
Y :::::::::::::::::::::::::::::::::::::::::
bits 6.5 * * *
5.8 * * * *
5.2 ** * * * *
4.5 *** * ** * * * * * * * ** * * * **
Relative 3.9 *********** *** * ******* *** ** * *****
Entropy 3.2 *****************************************
(175.8 bits) 2.6 *****************************************
1.9 *****************************************
1.3 *****************************************
0.6 *****************************************
0.0 -----------------------------------------
Multilevel AANENPHHDIRKGRASWKSNRWPQENKETQKEMKNKNRNWE
consensus
sequence
--------------------------------------------------------------------------------
--------------------------------------------------------------------------------
	Motif AANENPHHDIRKGRASWKSNRWPQENKETQKEMKNKNRNWE MEME-4 sites sorted by position p-value
--------------------------------------------------------------------------------
Sequence name Start P-value Site
------------- ----- --------- -----------------------------------------
XP_047279918.1 128 1.24e-53 PEPSKLPYIK AANENPHHDIRKGRASWKSNRWPQENKETQKEMKNKNRNWE KHRKADRHRE
XP_047279916.1 220 1.24e-53 PEPSKLPYIK AANENPHHDIRKGRASWKSNRWPQENKETQKEMKNKNRNWE KHRKADRHRE
XP_047279915.1 220 1.24e-53 PEPSKLPYIK AANENPHHDIRKGRASWKSNRWPQENKETQKEMKNKNRNWE KHRKADRHRE
XP_047279914.1 386 1.24e-53 PEPSKLPYIK AANENPHHDIRKGRASWKSNRWPQENKETQKEMKNKNRNWE KHRKADRHRE
XP_047279913.1 386 1.24e-53 PEPSKLPYIK AANENPHHDIRKGRASWKSNRWPQENKETQKEMKNKNRNWE KHRKADRHRE
XP_024303459.1 220 1.24e-53 PEPSKLPYIK AANENPHHDIRKGRASWKSNRWPQENKETQKEMKNKNRNWE KHRKADRHRE
XP_016870689.1 220 1.24e-53 PEPSKLPYIK AANENPHHDIRKGRASWKSNRWPQENKETQKEMKNKNRNWE KHRKADRHRE
XP_016870688.1 220 1.24e-53 PEPSKLPYIK AANENPHHDIRKGRASWKSNRWPQENKETQKEMKNKNRNWE KHRKADRHRE
XP_016870687.1 386 1.24e-53 PEPSKLPYIK AANENPHHDIRKGRASWKSNRWPQENKETQKEMKNKNRNWE KHRKADRHRE
XP_016870686.1 386 1.24e-53 PEPSKLPYIK AANENPHHDIRKGRASWKSNRWPQENKETQKEMKNKNRNWE KHRKADRHRE
XP_011516353.1 224 1.24e-53 PEPSKLPYIK AANENPHHDIRKGRASWKSNRWPQENKETQKEMKNKNRNWE KHRKADRHRE
XP_011516352.1 386 1.24e-53 PEPSKLPYIK AANENPHHDIRKGRASWKSNRWPQENKETQKEMKNKNRNWE KHRKADRHRE
XP_005251669.1 418 1.24e-53 PEPSKLPYIK AANENPHHDIRKGRASWKSNRWPQENKETQKEMKNKNRNWE KHRKADRHRE
XP_005251665.1 418 1.24e-53 PEPSKLPYIK AANENPHHDIRKGRASWKSNRWPQENKETQKEMKNKNRNWE KHRKADRHRE
NP_115602.2 418 1.24e-53 PEPSKLPYIK AANENPHHDIRKGRASWKSNRWPQENKETQKEMKNKNRNWE KHRKADRHRE
NP_001276050.1 418 1.24e-53 PEPSKLPYIK AANENPHHDIRKGRASWKSNRWPQENKETQKEMKNKNRNWE KHRKADRHRE
NP_001276049.1 418 1.24e-53 PEPSKLPYIK AANENPHHDIRKGRASWKSNRWPQENKETQKEMKNKNRNWE KHRKADRHRE
NP_001276048.1 418 1.24e-53 PEPSKLPYIK AANENPHHDIRKGRASWKSNRWPQENKETQKEMKNKNRNWE KHRKADRHRE
--------------------------------------------------------------------------------
--------------------------------------------------------------------------------
	Motif AANENPHHDIRKGRASWKSNRWPQENKETQKEMKNKNRNWE MEME-4 block diagrams
--------------------------------------------------------------------------------
SEQUENCE NAME POSITION P-VALUE MOTIF DIAGRAM
------------- ---------------- -------------
XP_047279918.1 1.2e-53 127_[4]_85
XP_047279916.1 1.2e-53 219_[4]_85
XP_047279915.1 1.2e-53 219_[4]_85
XP_047279914.1 1.2e-53 385_[4]_85
XP_047279913.1 1.2e-53 385_[4]_85
XP_024303459.1 1.2e-53 219_[4]_85
XP_016870689.1 1.2e-53 219_[4]_85
XP_016870688.1 1.2e-53 219_[4]_85
XP_016870687.1 1.2e-53 385_[4]_85
XP_016870686.1 1.2e-53 385_[4]_85
XP_011516353.1 1.2e-53 223_[4]_85
XP_011516352.1 1.2e-53 385_[4]_85
XP_005251669.1 1.2e-53 417_[4]_85
XP_005251665.1 1.2e-53 417_[4]_85
NP_115602.2 1.2e-53 417_[4]_85
NP_001276050.1 1.2e-53 417_[4]_85
NP_001276049.1 1.2e-53 417_[4]_85
NP_001276048.1 1.2e-53 417_[4]_85
--------------------------------------------------------------------------------
--------------------------------------------------------------------------------
	Motif AANENPHHDIRKGRASWKSNRWPQENKETQKEMKNKNRNWE MEME-4 in BLOCKS format
--------------------------------------------------------------------------------
BL MOTIF AANENPHHDIRKGRASWKSNRWPQENKETQKEMKNKNRNWE width=41 seqs=18
XP_047279918.1 ( 128) AANENPHHDIRKGRASWKSNRWPQENKETQKEMKNKNRNWE 1
XP_047279916.1 ( 220) AANENPHHDIRKGRASWKSNRWPQENKETQKEMKNKNRNWE 1
XP_047279915.1 ( 220) AANENPHHDIRKGRASWKSNRWPQENKETQKEMKNKNRNWE 1
XP_047279914.1 ( 386) AANENPHHDIRKGRASWKSNRWPQENKETQKEMKNKNRNWE 1
XP_047279913.1 ( 386) AANENPHHDIRKGRASWKSNRWPQENKETQKEMKNKNRNWE 1
XP_024303459.1 ( 220) AANENPHHDIRKGRASWKSNRWPQENKETQKEMKNKNRNWE 1
XP_016870689.1 ( 220) AANENPHHDIRKGRASWKSNRWPQENKETQKEMKNKNRNWE 1
XP_016870688.1 ( 220) AANENPHHDIRKGRASWKSNRWPQENKETQKEMKNKNRNWE 1
XP_016870687.1 ( 386) AANENPHHDIRKGRASWKSNRWPQENKETQKEMKNKNRNWE 1
XP_016870686.1 ( 386) AANENPHHDIRKGRASWKSNRWPQENKETQKEMKNKNRNWE 1
XP_011516353.1 ( 224) AANENPHHDIRKGRASWKSNRWPQENKETQKEMKNKNRNWE 1
XP_011516352.1 ( 386) AANENPHHDIRKGRASWKSNRWPQENKETQKEMKNKNRNWE 1
XP_005251669.1 ( 418) AANENPHHDIRKGRASWKSNRWPQENKETQKEMKNKNRNWE 1
XP_005251665.1 ( 418) AANENPHHDIRKGRASWKSNRWPQENKETQKEMKNKNRNWE 1
NP_115602.2 ( 418) AANENPHHDIRKGRASWKSNRWPQENKETQKEMKNKNRNWE 1
NP_001276050.1 ( 418) AANENPHHDIRKGRASWKSNRWPQENKETQKEMKNKNRNWE 1
NP_001276049.1 ( 418) AANENPHHDIRKGRASWKSNRWPQENKETQKEMKNKNRNWE 1
NP_001276048.1 ( 418) AANENPHHDIRKGRASWKSNRWPQENKETQKEMKNKNRNWE 1
//
--------------------------------------------------------------------------------
--------------------------------------------------------------------------------
	Motif AANENPHHDIRKGRASWKSNRWPQENKETQKEMKNKNRNWE MEME-4 position-specific scoring matrix
--------------------------------------------------------------------------------
log-odds matrix: alength= 20 w= 41 n= 23398 bayes= 10.4775 E= 4.0e-688
424 -467 -638 -692 -562 -412 -628 -562 -718 -585 -532 -579 -610 -610 -640 -439 -414 -440 -569 -601
424 -467 -638 -692 -562 -412 -628 -562 -718 -585 -532 -579 -610 -610 -640 -439 -414 -440 -569 -601
-451 -525 -362 -574 -454 -443 -284 -418 -519 -514 -450 447 -553 -419 -507 -392 -363 -470 -431 -449
-452 -632 -228 360 -551 -501 -498 -479 -626 -586 -525 -421 -679 -387 -586 -606 -500 -512 -541 -553
-451 -525 -362 -574 -454 -443 -284 -418 -519 -514 -450 447 -553 -419 -507 -392 -363 -470 -431 -449
-432 -641 -587 -632 -581 -536 -589 -597 -637 -585 -592 -593 388 -560 -603 -586 -509 -567 -592 -614
-666 -699 -656 -771 -574 -599 499 -744 -795 -683 -680 -573 -696 -565 -651 -739 -648 -719 -573 -493
-666 -699 -656 -771 -574 -599 499 -744 -795 -683 -680 -573 -696 -565 -651 -739 -648 -719 -573 -493
-398 -549 411 -268 -474 -446 -416 -472 -564 -516 -471 -207 -593 -467 -522 -504 -450 -462 -468 -453
-503 -577 -692 -769 -463 -608 -687 469 -769 -358 -380 -673 -701 -696 -717 -727 -511 -207 -586 -563
-385 -436 -518 -564 -483 -451 -322 -432 -282 -447 -426 -399 -484 -328 392 -511 -417 -504 -349 -453
-353 -477 -516 -510 -512 -471 -444 -387 339 -479 -401 -387 -529 -426 -123 -535 -384 -458 -419 -473
-316 -548 -427 -531 -529 409 -505 -543 -540 -588 -503 -385 -571 -522 -494 -470 -465 -505 -477 -510
-385 -436 -518 -564 -483 -451 -322 -432 -282 -447 -426 -399 -484 -328 392 -511 -417 -504 -349 -453
424 -467 -638 -692 -562 -412 -628 -562 -718 -585 -532 -579 -610 -610 -640 -439 -414 -440 -569 -601
-417 -588 -653 -764 -625 -514 -656 -689 -760 -682 -657 -590 -656 -672 -683 320 -403 -618 -608 -632
-417 -468 -478 -522 -150 -448 -452 -411 -528 -293 -326 -442 -550 -434 -449 -537 -424 -380 641 -195
-353 -477 -516 -510 -512 -471 -444 -387 339 -479 -401 -387 -529 -426 -123 -535 -384 -458 -419 -473
-417 -588 -653 -764 -625 -514 -656 -689 -760 -682 -657 -590 -656 -672 -683 320 -403 -618 -608 -632
-451 -525 -362 -574 -454 -443 -284 -418 -519 -514 -450 447 -553 -419 -507 -392 -363 -470 -431 -449
-385 -436 -518 -564 -483 -451 -322 -432 -282 -447 -426 -399 -484 -328 392 -511 -417 -504 -349 -453
-417 -468 -478 -522 -150 -448 -452 -411 -528 -293 -326 -442 -550 -434 -449 -537 -424 -380 641 -195
-432 -641 -587 -632 -581 -536 -589 -597 -637 -585 -592 -593 388 -560 -603 -586 -509 -567 -592 -614
-461 -597 -578 -428 -561 -553 -323 -554 -583 -493 -399 -483 -584 450 -487 -596 -500 -553 -492 -560
-452 -632 -228 360 -551 -501 -498 -479 -626 -586 -525 -421 -679 -387 -586 -606 -500 -512 -541 -553
-451 -525 -362 -574 -454 -443 -284 -418 -519 -514 -450 447 -553 -419 -507 -392 -363 -470 -431 -449
-353 -477 -516 -510 -512 -471 -444 -387 339 -479 -401 -387 -529 -426 -123 -535 -384 -458 -419 -473
-452 -632 -228 360 -551 -501 -498 -479 -626 -586 -525 -421 -679 -387 -586 -606 -500 -512 -541 -553
-480 -602 -644 -745 -603 -555 -637 -570 -714 -643 -564 -549 -663 -627 -655 -481 449 -541 -590 -625
-461 -597 -578 -428 -561 -553 -323 -554 -583 -493 -399 -483 -584 450 -487 -596 -500 -553 -492 -560
-353 -477 -516 -510 -512 -471 -444 -387 339 -479 -401 -387 -529 -426 -123 -535 -384 -458 -419 -473
-452 -632 -228 360 -551 -501 -498 -479 -626 -586 -525 -421 -679 -387 -586 -606 -500 -512 -541 -553
-419 -454 -551 -596 -362 -512 -524 -231 -575 -203 560 -506 -571 -511 -579 -552 -415 -303 -317 -330
-353 -477 -516 -510 -512 -471 -444 -387 339 -479 -401 -387 -529 -426 -123 -535 -384 -458 -419 -473
-451 -525 -362 -574 -454 -443 -284 -418 -519 -514 -450 447 -553 -419 -507 -392 -363 -470 -431 -449
-353 -477 -516 -510 -512 -471 -444 -387 339 -479 -401 -387 -529 -426 -123 -535 -384 -458 -419 -473
-451 -525 -362 -574 -454 -443 -284 -418 -519 -514 -450 447 -553 -419 -507 -392 -363 -470 -431 -449
-385 -436 -518 -564 -483 -451 -322 -432 -282 -447 -426 -399 -484 -328 392 -511 -417 -504 -349 -453
-451 -525 -362 -574 -454 -443 -284 -418 -519 -514 -450 447 -553 -419 -507 -392 -363 -470 -431 -449
-417 -468 -478 -522 -150 -448 -452 -411 -528 -293 -326 -442 -550 -434 -449 -537 -424 -380 641 -195
-452 -632 -228 360 -551 -501 -498 -479 -626 -586 -525 -421 -679 -387 -586 -606 -500 -512 -541 -553
--------------------------------------------------------------------------------
--------------------------------------------------------------------------------
	Motif AANENPHHDIRKGRASWKSNRWPQENKETQKEMKNKNRNWE MEME-4 position-specific probability matrix
--------------------------------------------------------------------------------
letter-probability matrix: alength= 20 w= 41 nsites= 18 E= 4.0e-688
1.000000 0.000000 0.000000 0.000000 0.000000 0.000000 0.000000 0.000000 0.000000 0.000000 0.000000 0.000000 0.000000 0.000000 0.000000 0.000000 0.000000 0.000000 0.000000 0.000000
1.000000 0.000000 0.000000 0.000000 0.000000 0.000000 0.000000 0.000000 0.000000 0.000000 0.000000 0.000000 0.000000 0.000000 0.000000 0.000000 0.000000 0.000000 0.000000 0.000000
0.000000 0.000000 0.000000 0.000000 0.000000 0.000000 0.000000 0.000000 0.000000 0.000000 0.000000 1.000000 0.000000 0.000000 0.000000 0.000000 0.000000 0.000000 0.000000 0.000000
0.000000 0.000000 0.000000 1.000000 0.000000 0.000000 0.000000 0.000000 0.000000 0.000000 0.000000 0.000000 0.000000 0.000000 0.000000 0.000000 0.000000 0.000000 0.000000 0.000000
0.000000 0.000000 0.000000 0.000000 0.000000 0.000000 0.000000 0.000000 0.000000 0.000000 0.000000 1.000000 0.000000 0.000000 0.000000 0.000000 0.000000 0.000000 0.000000 0.000000
0.000000 0.000000 0.000000 0.000000 0.000000 0.000000 0.000000 0.000000 0.000000 0.000000 0.000000 0.000000 1.000000 0.000000 0.000000 0.000000 0.000000 0.000000 0.000000 0.000000
0.000000 0.000000 0.000000 0.000000 0.000000 0.000000 1.000000 0.000000 0.000000 0.000000 0.000000 0.000000 0.000000 0.000000 0.000000 0.000000 0.000000 0.000000 0.000000 0.000000
0.000000 0.000000 0.000000 0.000000 0.000000 0.000000 1.000000 0.000000 0.000000 0.000000 0.000000 0.000000 0.000000 0.000000 0.000000 0.000000 0.000000 0.000000 0.000000 0.000000
0.000000 0.000000 1.000000 0.000000 0.000000 0.000000 0.000000 0.000000 0.000000 0.000000 0.000000 0.000000 0.000000 0.000000 0.000000 0.000000 0.000000 0.000000 0.000000 0.000000
0.000000 0.000000 0.000000 0.000000 0.000000 0.000000 0.000000 1.000000 0.000000 0.000000 0.000000 0.000000 0.000000 0.000000 0.000000 0.000000 0.000000 0.000000 0.000000 0.000000
0.000000 0.000000 0.000000 0.000000 0.000000 0.000000 0.000000 0.000000 0.000000 0.000000 0.000000 0.000000 0.000000 0.000000 1.000000 0.000000 0.000000 0.000000 0.000000 0.000000
0.000000 0.000000 0.000000 0.000000 0.000000 0.000000 0.000000 0.000000 1.000000 0.000000 0.000000 0.000000 0.000000 0.000000 0.000000 0.000000 0.000000 0.000000 0.000000 0.000000
0.000000 0.000000 0.000000 0.000000 0.000000 1.000000 0.000000 0.000000 0.000000 0.000000 0.000000 0.000000 0.000000 0.000000 0.000000 0.000000 0.000000 0.000000 0.000000 0.000000
0.000000 0.000000 0.000000 0.000000 0.000000 0.000000 0.000000 0.000000 0.000000 0.000000 0.000000 0.000000 0.000000 0.000000 1.000000 0.000000 0.000000 0.000000 0.000000 0.000000
1.000000 0.000000 0.000000 0.000000 0.000000 0.000000 0.000000 0.000000 0.000000 0.000000 0.000000 0.000000 0.000000 0.000000 0.000000 0.000000 0.000000 0.000000 0.000000 0.000000
0.000000 0.000000 0.000000 0.000000 0.000000 0.000000 0.000000 0.000000 0.000000 0.000000 0.000000 0.000000 0.000000 0.000000 0.000000 1.000000 0.000000 0.000000 0.000000 0.000000
0.000000 0.000000 0.000000 0.000000 0.000000 0.000000 0.000000 0.000000 0.000000 0.000000 0.000000 0.000000 0.000000 0.000000 0.000000 0.000000 0.000000 0.000000 1.000000 0.000000
0.000000 0.000000 0.000000 0.000000 0.000000 0.000000 0.000000 0.000000 1.000000 0.000000 0.000000 0.000000 0.000000 0.000000 0.000000 0.000000 0.000000 0.000000 0.000000 0.000000
0.000000 0.000000 0.000000 0.000000 0.000000 0.000000 0.000000 0.000000 0.000000 0.000000 0.000000 0.000000 0.000000 0.000000 0.000000 1.000000 0.000000 0.000000 0.000000 0.000000
0.000000 0.000000 0.000000 0.000000 0.000000 0.000000 0.000000 0.000000 0.000000 0.000000 0.000000 1.000000 0.000000 0.000000 0.000000 0.000000 0.000000 0.000000 0.000000 0.000000
0.000000 0.000000 0.000000 0.000000 0.000000 0.000000 0.000000 0.000000 0.000000 0.000000 0.000000 0.000000 0.000000 0.000000 1.000000 0.000000 0.000000 0.000000 0.000000 0.000000
0.000000 0.000000 0.000000 0.000000 0.000000 0.000000 0.000000 0.000000 0.000000 0.000000 0.000000 0.000000 0.000000 0.000000 0.000000 0.000000 0.000000 0.000000 1.000000 0.000000
0.000000 0.000000 0.000000 0.000000 0.000000 0.000000 0.000000 0.000000 0.000000 0.000000 0.000000 0.000000 1.000000 0.000000 0.000000 0.000000 0.000000 0.000000 0.000000 0.000000
0.000000 0.000000 0.000000 0.000000 0.000000 0.000000 0.000000 0.000000 0.000000 0.000000 0.000000 0.000000 0.000000 1.000000 0.000000 0.000000 0.000000 0.000000 0.000000 0.000000
0.000000 0.000000 0.000000 1.000000 0.000000 0.000000 0.000000 0.000000 0.000000 0.000000 0.000000 0.000000 0.000000 0.000000 0.000000 0.000000 0.000000 0.000000 0.000000 0.000000
0.000000 0.000000 0.000000 0.000000 0.000000 0.000000 0.000000 0.000000 0.000000 0.000000 0.000000 1.000000 0.000000 0.000000 0.000000 0.000000 0.000000 0.000000 0.000000 0.000000
0.000000 0.000000 0.000000 0.000000 0.000000 0.000000 0.000000 0.000000 1.000000 0.000000 0.000000 0.000000 0.000000 0.000000 0.000000 0.000000 0.000000 0.000000 0.000000 0.000000
0.000000 0.000000 0.000000 1.000000 0.000000 0.000000 0.000000 0.000000 0.000000 0.000000 0.000000 0.000000 0.000000 0.000000 0.000000 0.000000 0.000000 0.000000 0.000000 0.000000
0.000000 0.000000 0.000000 0.000000 0.000000 0.000000 0.000000 0.000000 0.000000 0.000000 0.000000 0.000000 0.000000 0.000000 0.000000 0.000000 1.000000 0.000000 0.000000 0.000000
0.000000 0.000000 0.000000 0.000000 0.000000 0.000000 0.000000 0.000000 0.000000 0.000000 0.000000 0.000000 0.000000 1.000000 0.000000 0.000000 0.000000 0.000000 0.000000 0.000000
0.000000 0.000000 0.000000 0.000000 0.000000 0.000000 0.000000 0.000000 1.000000 0.000000 0.000000 0.000000 0.000000 0.000000 0.000000 0.000000 0.000000 0.000000 0.000000 0.000000
0.000000 0.000000 0.000000 1.000000 0.000000 0.000000 0.000000 0.000000 0.000000 0.000000 0.000000 0.000000 0.000000 0.000000 0.000000 0.000000 0.000000 0.000000 0.000000 0.000000
0.000000 0.000000 0.000000 0.000000 0.000000 0.000000 0.000000 0.000000 0.000000 0.000000 1.000000 0.000000 0.000000 0.000000 0.000000 0.000000 0.000000 0.000000 0.000000 0.000000
0.000000 0.000000 0.000000 0.000000 0.000000 0.000000 0.000000 0.000000 1.000000 0.000000 0.000000 0.000000 0.000000 0.000000 0.000000 0.000000 0.000000 0.000000 0.000000 0.000000
0.000000 0.000000 0.000000 0.000000 0.000000 0.000000 0.000000 0.000000 0.000000 0.000000 0.000000 1.000000 0.000000 0.000000 0.000000 0.000000 0.000000 0.000000 0.000000 0.000000
0.000000 0.000000 0.000000 0.000000 0.000000 0.000000 0.000000 0.000000 1.000000 0.000000 0.000000 0.000000 0.000000 0.000000 0.000000 0.000000 0.000000 0.000000 0.000000 0.000000
0.000000 0.000000 0.000000 0.000000 0.000000 0.000000 0.000000 0.000000 0.000000 0.000000 0.000000 1.000000 0.000000 0.000000 0.000000 0.000000 0.000000 0.000000 0.000000 0.000000
0.000000 0.000000 0.000000 0.000000 0.000000 0.000000 0.000000 0.000000 0.000000 0.000000 0.000000 0.000000 0.000000 0.000000 1.000000 0.000000 0.000000 0.000000 0.000000 0.000000
0.000000 0.000000 0.000000 0.000000 0.000000 0.000000 0.000000 0.000000 0.000000 0.000000 0.000000 1.000000 0.000000 0.000000 0.000000 0.000000 0.000000 0.000000 0.000000 0.000000
0.000000 0.000000 0.000000 0.000000 0.000000 0.000000 0.000000 0.000000 0.000000 0.000000 0.000000 0.000000 0.000000 0.000000 0.000000 0.000000 0.000000 0.000000 1.000000 0.000000
0.000000 0.000000 0.000000 1.000000 0.000000 0.000000 0.000000 0.000000 0.000000 0.000000 0.000000 0.000000 0.000000 0.000000 0.000000 0.000000 0.000000 0.000000 0.000000 0.000000
--------------------------------------------------------------------------------
--------------------------------------------------------------------------------
	Motif AANENPHHDIRKGRASWKSNRWPQENKETQKEMKNKNRNWE MEME-4 regular expression
--------------------------------------------------------------------------------
AANENPHHDIRKGRASWKSNRWPQENKETQKEMKNKNRNWE
--------------------------------------------------------------------------------
Time 61.61 secs.
********************************************************************************
********************************************************************************
MOTIF AYCYHCAQKGHYGHECPEREVYDPSPVSPFICYYDDKYEIQ MEME-5	width = 41 sites = 13 llr = 1634 E-value = 1.2e-493
********************************************************************************
--------------------------------------------------------------------------------
	Motif AYCYHCAQKGHYGHECPEREVYDPSPVSPFICYYDDKYEIQ MEME-5 Description
--------------------------------------------------------------------------------
Simplified A a:::::a::::::::::::::::::::::::::::::::::
pos.-specific C ::a::a:::::::::a:::::::::::::::a:::::::::
probability D ::::::::::::::::::::::a:::::::::::aa:::::
matrix E ::::::::::::::a::a:a::::::::::::::::::a::
F :::::::::::::::::::::::::::::a:::::::::::
G :::::::::a::a::::::::::::::::::::::::::::
H ::::a:::::a::a:::::::::::::::::::::::::::
I ::::::::::::::::::::::::::::::a::::::::a:
K ::::::::a:::::::::::::::::::::::::::a::::
L :::::::::::::::::::::::::::::::::::::::::
M :::::::::::::::::::::::::::::::::::::::::
N :::::::::::::::::::::::::::::::::::::::::
P ::::::::::::::::a::::::a:a::a::::::::::::
Q :::::::a::::::::::::::::::::::::::::::::a
R ::::::::::::::::::a::::::::::::::::::::::
S ::::::::::::::::::::::::a::a:::::::::::::
T :::::::::::::::::::::::::::::::::::::::::
V ::::::::::::::::::::a:::::a::::::::::::::
W :::::::::::::::::::::::::::::::::::::::::
Y :a:a:::::::a:::::::::a::::::::::aa:::a:::
bits 6.5
5.8
5.2 ***** ** * * * * *** *
4.5 ******** ** * * ** * ***** * **
Relative 3.9 ******** *************** ** ******** ****
Entropy 3.2 *****************************************
(181.4 bits) 2.6 *****************************************
1.9 *****************************************
1.3 *****************************************
0.6 *****************************************
0.0 -----------------------------------------
Multilevel AYCYHCAQKGHYGHECPEREVYDPSPVSPFICYYDDKYEIQ
consensus
sequence
--------------------------------------------------------------------------------
--------------------------------------------------------------------------------
	Motif AYCYHCAQKGHYGHECPEREVYDPSPVSPFICYYDDKYEIQ MEME-5 sites sorted by position p-value
--------------------------------------------------------------------------------
Sequence name Start P-value Site
------------- ----- --------- -----------------------------------------
XP_047279918.1 58 2.49e-55 PKTPSRPSAL AYCYHCAQKGHYGHECPEREVYDPSPVSPFICYYDDKYEIQ EREKRLKQKI
XP_047279916.1 150 2.49e-55 PKTPSRPSAL AYCYHCAQKGHYGHECPEREVYDPSPVSPFICYYDDKYEIQ EREKRLKQKI
XP_047279915.1 150 2.49e-55 PKTPSRPSAL AYCYHCAQKGHYGHECPEREVYDPSPVSPFICYYDDKYEIQ EREKRLKQKI
XP_024303459.1 150 2.49e-55 PKTPSRPSAL AYCYHCAQKGHYGHECPEREVYDPSPVSPFICYYDDKYEIQ EREKRLKQKI
XP_016870689.1 150 2.49e-55 PKTPSRPSAL AYCYHCAQKGHYGHECPEREVYDPSPVSPFICYYDDKYEIQ EREKRLKQKI
XP_016870688.1 150 2.49e-55 PKTPSRPSAL AYCYHCAQKGHYGHECPEREVYDPSPVSPFICYYDDKYEIQ EREKRLKQKI
XP_011516353.1 154 2.49e-55 PKTPSRPSAL AYCYHCAQKGHYGHECPEREVYDPSPVSPFICYYDDKYEIQ EREKRLKQKI
XP_005251669.1 348 2.49e-55 PKTPSRPSAL AYCYHCAQKGHYGHECPEREVYDPSPVSPFICYYDDKYEIQ EREKRLKQKI
XP_005251665.1 348 2.49e-55 PKTPSRPSAL AYCYHCAQKGHYGHECPEREVYDPSPVSPFICYYDDKYEIQ EREKRLKQKI
NP_115602.2 348 2.49e-55 PKTPSRPSAL AYCYHCAQKGHYGHECPEREVYDPSPVSPFICYYDDKYEIQ EREKRLKQKI
NP_001276050.1 348 2.49e-55 PKTPSRPSAL AYCYHCAQKGHYGHECPEREVYDPSPVSPFICYYDDKYEIQ EREKRLKQKI
NP_001276049.1 348 2.49e-55 PKTPSRPSAL AYCYHCAQKGHYGHECPEREVYDPSPVSPFICYYDDKYEIQ EREKRLKQKI
NP_001276048.1 348 2.49e-55 PKTPSRPSAL AYCYHCAQKGHYGHECPEREVYDPSPVSPFICYYDDKYEIQ EREKRLKQKI
--------------------------------------------------------------------------------
--------------------------------------------------------------------------------
	Motif AYCYHCAQKGHYGHECPEREVYDPSPVSPFICYYDDKYEIQ MEME-5 block diagrams
--------------------------------------------------------------------------------
SEQUENCE NAME POSITION P-VALUE MOTIF DIAGRAM
------------- ---------------- -------------
XP_047279918.1 2.5e-55 57_[5]_155
XP_047279916.1 2.5e-55 149_[5]_155
XP_047279915.1 2.5e-55 149_[5]_155
XP_024303459.1 2.5e-55 149_[5]_155
XP_016870689.1 2.5e-55 149_[5]_155
XP_016870688.1 2.5e-55 149_[5]_155
XP_011516353.1 2.5e-55 153_[5]_155
XP_005251669.1 2.5e-55 347_[5]_155
XP_005251665.1 2.5e-55 347_[5]_155
NP_115602.2 2.5e-55 347_[5]_155
NP_001276050.1 2.5e-55 347_[5]_155
NP_001276049.1 2.5e-55 347_[5]_155
NP_001276048.1 2.5e-55 347_[5]_155
--------------------------------------------------------------------------------
--------------------------------------------------------------------------------
	Motif AYCYHCAQKGHYGHECPEREVYDPSPVSPFICYYDDKYEIQ MEME-5 in BLOCKS format
--------------------------------------------------------------------------------
BL MOTIF AYCYHCAQKGHYGHECPEREVYDPSPVSPFICYYDDKYEIQ width=41 seqs=13
XP_047279918.1 ( 58) AYCYHCAQKGHYGHECPEREVYDPSPVSPFICYYDDKYEIQ 1
XP_047279916.1 ( 150) AYCYHCAQKGHYGHECPEREVYDPSPVSPFICYYDDKYEIQ 1
XP_047279915.1 ( 150) AYCYHCAQKGHYGHECPEREVYDPSPVSPFICYYDDKYEIQ 1
XP_024303459.1 ( 150) AYCYHCAQKGHYGHECPEREVYDPSPVSPFICYYDDKYEIQ 1
XP_016870689.1 ( 150) AYCYHCAQKGHYGHECPEREVYDPSPVSPFICYYDDKYEIQ 1
XP_016870688.1 ( 150) AYCYHCAQKGHYGHECPEREVYDPSPVSPFICYYDDKYEIQ 1
XP_011516353.1 ( 154) AYCYHCAQKGHYGHECPEREVYDPSPVSPFICYYDDKYEIQ 1
XP_005251669.1 ( 348) AYCYHCAQKGHYGHECPEREVYDPSPVSPFICYYDDKYEIQ 1
XP_005251665.1 ( 348) AYCYHCAQKGHYGHECPEREVYDPSPVSPFICYYDDKYEIQ 1
NP_115602.2 ( 348) AYCYHCAQKGHYGHECPEREVYDPSPVSPFICYYDDKYEIQ 1
NP_001276050.1 ( 348) AYCYHCAQKGHYGHECPEREVYDPSPVSPFICYYDDKYEIQ 1
NP_001276049.1 ( 348) AYCYHCAQKGHYGHECPEREVYDPSPVSPFICYYDDKYEIQ 1
NP_001276048.1 ( 348) AYCYHCAQKGHYGHECPEREVYDPSPVSPFICYYDDKYEIQ 1
//
--------------------------------------------------------------------------------
--------------------------------------------------------------------------------
	Motif AYCYHCAQKGHYGHECPEREVYDPSPVSPFICYYDDKYEIQ MEME-5 position-specific scoring matrix
--------------------------------------------------------------------------------
log-odds matrix: alength= 20 w= 41 n= 23398 bayes= 11.3436 E= 1.2e-493
420 -363 -549 -582 -459 -320 -543 -441 -609 -472 -412 -488 -543 -516 -544 -336 -322 -316 -482 -509
-587 -609 -642 -732 -185 -560 -415 -540 -714 -502 -515 -568 -652 -588 -620 -675 -580 -553 -280 521
-331 498 -535 -534 -425 -513 -508 -366 -602 -446 -365 -487 -586 -516 -511 -528 -357 -424 -516 -505
-587 -609 -642 -732 -185 -560 -415 -540 -714 -502 -515 -568 -652 -588 -620 -675 -580 -553 -280 521
-558 -606 -544 -645 -451 -528 497 -627 -688 -566 -534 -416 -616 -401 -515 -611 -528 -598 -468 -343
-331 498 -535 -534 -425 -513 -508 -366 -602 -446 -365 -487 -586 -516 -511 -528 -357 -424 -516 -505
420 -363 -549 -582 -459 -320 -543 -441 -609 -472 -412 -488 -543 -516 -544 -336 -322 -316 -482 -509
-344 -496 -477 -301 -464 -478 -198 -436 -465 -375 -273 -366 -484 444 -368 -482 -387 -437 -389 -463
-326 -451 -491 -482 -488 -448 -418 -360 337 -453 -373 -360 -505 -398 -96 -508 -358 -431 -395 -448
-249 -489 -363 -466 -470 407 -444 -479 -475 -530 -438 -319 -515 -459 -431 -404 -402 -440 -419 -450
-558 -606 -544 -645 -451 -528 497 -627 -688 -566 -534 -416 -616 -401 -515 -611 -528 -598 -468 -343
-587 -609 -642 -732 -185 -560 -415 -540 -714 -502 -515 -568 -652 -588 -620 -675 -580 -553 -280 521
-249 -489 -363 -466 -470 407 -444 -479 -475 -530 -438 -319 -515 -459 -431 -404 -402 -440 -419 -450
-558 -606 -544 -645 -451 -528 497 -627 -688 -566 -534 -416 -616 -401 -515 -611 -528 -598 -468 -343
-446 -627 -223 360 -546 -496 -493 -474 -618 -580 -520 -416 -673 -381 -580 -600 -494 -506 -537 -548
-331 498 -535 -534 -425 -513 -508 -366 -602 -446 -365 -487 -586 -516 -511 -528 -357 -424 -516 -505
-322 -556 -495 -527 -491 -457 -499 -492 -532 -486 -487 -497 385 -457 -506 -480 -405 -461 -523 -532
-446 -627 -223 360 -546 -496 -493 -474 -618 -580 -520 -416 -673 -381 -580 -600 -494 -506 -537 -548
-340 -392 -477 -519 -441 -412 -277 -387 -235 -402 -380 -354 -442 -282 389 -467 -373 -459 -306 -410
-446 -627 -223 360 -546 -496 -493 -474 -618 -580 -520 -416 -673 -381 -580 -600 -494 -506 -537 -548
-256 -405 -545 -571 -368 -491 -523 -77 -598 -292 -296 -524 -552 -539 -533 -546 -309 432 -497 -483
-587 -609 -642 -732 -185 -560 -415 -540 -714 -502 -515 -568 -652 -588 -620 -675 -580 -553 -280 521
-334 -491 407 -200 -414 -390 -353 -407 -500 -454 -405 -139 -542 -403 -461 -440 -387 -397 -412 -392
-322 -556 -495 -527 -491 -457 -499 -492 -532 -486 -487 -497 385 -457 -506 -480 -405 -461 -523 -532
-314 -486 -555 -657 -527 -433 -567 -571 -639 -583 -533 -455 -571 -568 -577 317 -229 -518 -530 -533
-322 -556 -495 -527 -491 -457 -499 -492 -532 -486 -487 -497 385 -457 -506 -480 -405 -461 -523 -532
-256 -405 -545 -571 -368 -491 -523 -77 -598 -292 -296 -524 -552 -539 -533 -546 -309 432 -497 -483
-314 -486 -555 -657 -527 -433 -567 -571 -639 -583 -533 -455 -571 -568 -577 317 -229 -518 -530 -533
-322 -556 -495 -527 -491 -457 -499 -492 -532 -486 -487 -497 385 -457 -506 -480 -405 -461 -523 -532
-358 -380 -504 -541 504 -477 -450 -252 -570 -199 -240 -474 -506 -509 -534 -464 -427 -293 -214 -87
-400 -488 -599 -651 -354 -541 -604 463 -645 -223 -245 -560 -628 -586 -616 -612 -400 -76 -493 -452
-331 498 -535 -534 -425 -513 -508 -366 -602 -446 -365 -487 -586 -516 -511 -528 -357 -424 -516 -505
-587 -609 -642 -732 -185 -560 -415 -540 -714 -502 -515 -568 -652 -588 -620 -675 -580 -553 -280 521
-587 -609 -642 -732 -185 -560 -415 -540 -714 -502 -515 -568 -652 -588 -620 -675 -580 -553 -280 521
-334 -491 407 -200 -414 -390 -353 -407 -500 -454 -405 -139 -542 -403 -461 -440 -387 -397 -412 -392
-334 -491 407 -200 -414 -390 -353 -407 -500 -454 -405 -139 -542 -403 -461 -440 -387 -397 -412 -392
-326 -451 -491 -482 -488 -448 -418 -360 337 -453 -373 -360 -505 -398 -96 -508 -358 -431 -395 -448
-587 -609 -642 -732 -185 -560 -415 -540 -714 -502 -515 -568 -652 -588 -620 -675 -580 -553 -280 521
-446 -627 -223 360 -546 -496 -493 -474 -618 -580 -520 -416 -673 -381 -580 -600 -494 -506 -537 -548
-400 -488 -599 -651 -354 -541 -604 463 -645 -223 -245 -560 -628 -586 -616 -612 -400 -76 -493 -452
-344 -496 -477 -301 -464 -478 -198 -436 -465 -375 -273 -366 -484 444 -368 -482 -387 -437 -389 -463
--------------------------------------------------------------------------------
--------------------------------------------------------------------------------
	Motif AYCYHCAQKGHYGHECPEREVYDPSPVSPFICYYDDKYEIQ MEME-5 position-specific probability matrix
--------------------------------------------------------------------------------
letter-probability matrix: alength= 20 w= 41 nsites= 13 E= 1.2e-493
1.000000 0.000000 0.000000 0.000000 0.000000 0.000000 0.000000 0.000000 0.000000 0.000000 0.000000 0.000000 0.000000 0.000000 0.000000 0.000000 0.000000 0.000000 0.000000 0.000000
0.000000 0.000000 0.000000 0.000000 0.000000 0.000000 0.000000 0.000000 0.000000 0.000000 0.000000 0.000000 0.000000 0.000000 0.000000 0.000000 0.000000 0.000000 0.000000 1.000000
0.000000 1.000000 0.000000 0.000000 0.000000 0.000000 0.000000 0.000000 0.000000 0.000000 0.000000 0.000000 0.000000 0.000000 0.000000 0.000000 0.000000 0.000000 0.000000 0.000000
0.000000 0.000000 0.000000 0.000000 0.000000 0.000000 0.000000 0.000000 0.000000 0.000000 0.000000 0.000000 0.000000 0.000000 0.000000 0.000000 0.000000 0.000000 0.000000 1.000000
0.000000 0.000000 0.000000 0.000000 0.000000 0.000000 1.000000 0.000000 0.000000 0.000000 0.000000 0.000000 0.000000 0.000000 0.000000 0.000000 0.000000 0.000000 0.000000 0.000000
0.000000 1.000000 0.000000 0.000000 0.000000 0.000000 0.000000 0.000000 0.000000 0.000000 0.000000 0.000000 0.000000 0.000000 0.000000 0.000000 0.000000 0.000000 0.000000 0.000000
1.000000 0.000000 0.000000 0.000000 0.000000 0.000000 0.000000 0.000000 0.000000 0.000000 0.000000 0.000000 0.000000 0.000000 0.000000 0.000000 0.000000 0.000000 0.000000 0.000000
0.000000 0.000000 0.000000 0.000000 0.000000 0.000000 0.000000 0.000000 0.000000 0.000000 0.000000 0.000000 0.000000 1.000000 0.000000 0.000000 0.000000 0.000000 0.000000 0.000000
0.000000 0.000000 0.000000 0.000000 0.000000 0.000000 0.000000 0.000000 1.000000 0.000000 0.000000 0.000000 0.000000 0.000000 0.000000 0.000000 0.000000 0.000000 0.000000 0.000000
0.000000 0.000000 0.000000 0.000000 0.000000 1.000000 0.000000 0.000000 0.000000 0.000000 0.000000 0.000000 0.000000 0.000000 0.000000 0.000000 0.000000 0.000000 0.000000 0.000000
0.000000 0.000000 0.000000 0.000000 0.000000 0.000000 1.000000 0.000000 0.000000 0.000000 0.000000 0.000000 0.000000 0.000000 0.000000 0.000000 0.000000 0.000000 0.000000 0.000000
0.000000 0.000000 0.000000 0.000000 0.000000 0.000000 0.000000 0.000000 0.000000 0.000000 0.000000 0.000000 0.000000 0.000000 0.000000 0.000000 0.000000 0.000000 0.000000 1.000000
0.000000 0.000000 0.000000 0.000000 0.000000 1.000000 0.000000 0.000000 0.000000 0.000000 0.000000 0.000000 0.000000 0.000000 0.000000 0.000000 0.000000 0.000000 0.000000 0.000000
0.000000 0.000000 0.000000 0.000000 0.000000 0.000000 1.000000 0.000000 0.000000 0.000000 0.000000 0.000000 0.000000 0.000000 0.000000 0.000000 0.000000 0.000000 0.000000 0.000000
0.000000 0.000000 0.000000 1.000000 0.000000 0.000000 0.000000 0.000000 0.000000 0.000000 0.000000 0.000000 0.000000 0.000000 0.000000 0.000000 0.000000 0.000000 0.000000 0.000000
0.000000 1.000000 0.000000 0.000000 0.000000 0.000000 0.000000 0.000000 0.000000 0.000000 0.000000 0.000000 0.000000 0.000000 0.000000 0.000000 0.000000 0.000000 0.000000 0.000000
0.000000 0.000000 0.000000 0.000000 0.000000 0.000000 0.000000 0.000000 0.000000 0.000000 0.000000 0.000000 1.000000 0.000000 0.000000 0.000000 0.000000 0.000000 0.000000 0.000000
0.000000 0.000000 0.000000 1.000000 0.000000 0.000000 0.000000 0.000000 0.000000 0.000000 0.000000 0.000000 0.000000 0.000000 0.000000 0.000000 0.000000 0.000000 0.000000 0.000000
0.000000 0.000000 0.000000 0.000000 0.000000 0.000000 0.000000 0.000000 0.000000 0.000000 0.000000 0.000000 0.000000 0.000000 1.000000 0.000000 0.000000 0.000000 0.000000 0.000000
0.000000 0.000000 0.000000 1.000000 0.000000 0.000000 0.000000 0.000000 0.000000 0.000000 0.000000 0.000000 0.000000 0.000000 0.000000 0.000000 0.000000 0.000000 0.000000 0.000000
0.000000 0.000000 0.000000 0.000000 0.000000 0.000000 0.000000 0.000000 0.000000 0.000000 0.000000 0.000000 0.000000 0.000000 0.000000 0.000000 0.000000 1.000000 0.000000 0.000000
0.000000 0.000000 0.000000 0.000000 0.000000 0.000000 0.000000 0.000000 0.000000 0.000000 0.000000 0.000000 0.000000 0.000000 0.000000 0.000000 0.000000 0.000000 0.000000 1.000000
0.000000 0.000000 1.000000 0.000000 0.000000 0.000000 0.000000 0.000000 0.000000 0.000000 0.000000 0.000000 0.000000 0.000000 0.000000 0.000000 0.000000 0.000000 0.000000 0.000000
0.000000 0.000000 0.000000 0.000000 0.000000 0.000000 0.000000 0.000000 0.000000 0.000000 0.000000 0.000000 1.000000 0.000000 0.000000 0.000000 0.000000 0.000000 0.000000 0.000000
0.000000 0.000000 0.000000 0.000000 0.000000 0.000000 0.000000 0.000000 0.000000 0.000000 0.000000 0.000000 0.000000 0.000000 0.000000 1.000000 0.000000 0.000000 0.000000 0.000000
0.000000 0.000000 0.000000 0.000000 0.000000 0.000000 0.000000 0.000000 0.000000 0.000000 0.000000 0.000000 1.000000 0.000000 0.000000 0.000000 0.000000 0.000000 0.000000 0.000000
0.000000 0.000000 0.000000 0.000000 0.000000 0.000000 0.000000 0.000000 0.000000 0.000000 0.000000 0.000000 0.000000 0.000000 0.000000 0.000000 0.000000 1.000000 0.000000 0.000000
0.000000 0.000000 0.000000 0.000000 0.000000 0.000000 0.000000 0.000000 0.000000 0.000000 0.000000 0.000000 0.000000 0.000000 0.000000 1.000000 0.000000 0.000000 0.000000 0.000000
0.000000 0.000000 0.000000 0.000000 0.000000 0.000000 0.000000 0.000000 0.000000 0.000000 0.000000 0.000000 1.000000 0.000000 0.000000 0.000000 0.000000 0.000000 0.000000 0.000000
0.000000 0.000000 0.000000 0.000000 1.000000 0.000000 0.000000 0.000000 0.000000 0.000000 0.000000 0.000000 0.000000 0.000000 0.000000 0.000000 0.000000 0.000000 0.000000 0.000000
0.000000 0.000000 0.000000 0.000000 0.000000 0.000000 0.000000 1.000000 0.000000 0.000000 0.000000 0.000000 0.000000 0.000000 0.000000 0.000000 0.000000 0.000000 0.000000 0.000000
0.000000 1.000000 0.000000 0.000000 0.000000 0.000000 0.000000 0.000000 0.000000 0.000000 0.000000 0.000000 0.000000 0.000000 0.000000 0.000000 0.000000 0.000000 0.000000 0.000000
0.000000 0.000000 0.000000 0.000000 0.000000 0.000000 0.000000 0.000000 0.000000 0.000000 0.000000 0.000000 0.000000 0.000000 0.000000 0.000000 0.000000 0.000000 0.000000 1.000000
0.000000 0.000000 0.000000 0.000000 0.000000 0.000000 0.000000 0.000000 0.000000 0.000000 0.000000 0.000000 0.000000 0.000000 0.000000 0.000000 0.000000 0.000000 0.000000 1.000000
0.000000 0.000000 1.000000 0.000000 0.000000 0.000000 0.000000 0.000000 0.000000 0.000000 0.000000 0.000000 0.000000 0.000000 0.000000 0.000000 0.000000 0.000000 0.000000 0.000000
0.000000 0.000000 1.000000 0.000000 0.000000 0.000000 0.000000 0.000000 0.000000 0.000000 0.000000 0.000000 0.000000 0.000000 0.000000 0.000000 0.000000 0.000000 0.000000 0.000000
0.000000 0.000000 0.000000 0.000000 0.000000 0.000000 0.000000 0.000000 1.000000 0.000000 0.000000 0.000000 0.000000 0.000000 0.000000 0.000000 0.000000 0.000000 0.000000 0.000000
0.000000 0.000000 0.000000 0.000000 0.000000 0.000000 0.000000 0.000000 0.000000 0.000000 0.000000 0.000000 0.000000 0.000000 0.000000 0.000000 0.000000 0.000000 0.000000 1.000000
0.000000 0.000000 0.000000 1.000000 0.000000 0.000000 0.000000 0.000000 0.000000 0.000000 0.000000 0.000000 0.000000 0.000000 0.000000 0.000000 0.000000 0.000000 0.000000 0.000000
0.000000 0.000000 0.000000 0.000000 0.000000 0.000000 0.000000 1.000000 0.000000 0.000000 0.000000 0.000000 0.000000 0.000000 0.000000 0.000000 0.000000 0.000000 0.000000 0.000000
0.000000 0.000000 0.000000 0.000000 0.000000 0.000000 0.000000 0.000000 0.000000 0.000000 0.000000 0.000000 0.000000 1.000000 0.000000 0.000000 0.000000 0.000000 0.000000 0.000000
--------------------------------------------------------------------------------
--------------------------------------------------------------------------------
	Motif AYCYHCAQKGHYGHECPEREVYDPSPVSPFICYYDDKYEIQ MEME-5 regular expression
--------------------------------------------------------------------------------
AYCYHCAQKGHYGHECPEREVYDPSPVSPFICYYDDKYEIQ
--------------------------------------------------------------------------------
Time 74.97 secs.
********************************************************************************
********************************************************************************
MOTIF RGKQKKKERCWEDDDNDNLFLIKQRKKKS MEME-6	width = 29 sites = 35 llr = 1943 E-value = 6.9e-491
********************************************************************************
--------------------------------------------------------------------------------
	Motif RGKQKKKERCWEDDDNDNLFLIKQRKKKS MEME-6 Description
--------------------------------------------------------------------------------
Simplified A ::::::::::::::::::1:::::::::2
pos.-specific C :::::::::5:::::::::::::::::::
probability D :::::::::2::579:91:2:::2:::::
matrix E :2::1::51::631:::::1:2:::::::
F ::1::::::::::::::1:6:::::::::
G :5::::::::::::::1::::::::2:::
H 1::::::2:::::::::::::::::::::
I ::::::1::1::::::::::15:::::::
K 21929992:::2:::::::::151:595:
L :::1:1::::1:::::::5:51:::::::
M ::::::::1:::::::::1::::::::1:
N :1:1:::::::1:::7:5::::::1::::
P 1::::::::::::::::::::::::1:::
Q :::5:::::::::::::::::::7::1::
R 5::::::17:3:::::::::::3:6::3:
S ::::::::::::22:2:22:2:2::1::6
T ::::::::::::::::::::::::2::::
V :::::::::1::::1:::::::::::::1
W ::::::::::5::::1:::::::::::::
Y :::::::::1::::::::::1::::::::
bits 6.5
5.8
5.2
4.5
Relative 3.9 * * *
Entropy 3.2 * *** *** *** * * *
(80.1 bits) 2.6 ***** ********** * * ** ***
1.9 *****************************
1.3 *****************************
0.6 *****************************
0.0 -----------------------------
Multilevel RGKQKKKERCWEDDDNDNLFLIKQRKKKS
consensus KE K H DRKES S SSDSERDTG RA
sequence K S S
--------------------------------------------------------------------------------
--------------------------------------------------------------------------------
	Motif RGKQKKKERCWEDDDNDNLFLIKQRKKKS MEME-6 sites sorted by position p-value
--------------------------------------------------------------------------------
Sequence name Start P-value Site
------------- ----- --------- -----------------------------
XP_047279918.1 225 7.93e-36 REDKSPKEGK RGKQKKKERCWEDDDNDNLFLIKQRKKKS
XP_047279916.1 317 7.93e-36 REDKSPKEGK RGKQKKKERCWEDDDNDNLFLIKQRKKKS
XP_047279915.1 317 7.93e-36 REDKSPKEGK RGKQKKKERCWEDDDNDNLFLIKQRKKKS
XP_047279914.1 483 7.93e-36 REDKSPKEGK RGKQKKKERCWEDDDNDNLFLIKQRKKKS
XP_047279913.1 483 7.93e-36 REDKSPKEGK RGKQKKKERCWEDDDNDNLFLIKQRKKKS
XP_024303459.1 317 7.93e-36 REDKSPKEGK RGKQKKKERCWEDDDNDNLFLIKQRKKKS
XP_016870689.1 317 7.93e-36 REDKSPKEGK RGKQKKKERCWEDDDNDNLFLIKQRKKKS
XP_016870688.1 317 7.93e-36 REDKSPKEGK RGKQKKKERCWEDDDNDNLFLIKQRKKKS
XP_016870687.1 483 7.93e-36 REDKSPKEGK RGKQKKKERCWEDDDNDNLFLIKQRKKKS
XP_016870686.1 483 7.93e-36 REDKSPKEGK RGKQKKKERCWEDDDNDNLFLIKQRKKKS
XP_011516353.1 321 7.93e-36 REDKSPKEGK RGKQKKKERCWEDDDNDNLFLIKQRKKKS
XP_011516352.1 483 7.93e-36 REDKSPKEGK RGKQKKKERCWEDDDNDNLFLIKQRKKKS
XP_005251669.1 515 7.93e-36 REDKSPKEGK RGKQKKKERCWEDDDNDNLFLIKQRKKKS
XP_005251665.1 515 7.93e-36 REDKSPKEGK RGKQKKKERCWEDDDNDNLFLIKQRKKKS
NP_115602.2 515 7.93e-36 REDKSPKEGK RGKQKKKERCWEDDDNDNLFLIKQRKKKS
NP_001276050.1 515 7.93e-36 REDKSPKEGK RGKQKKKERCWEDDDNDNLFLIKQRKKKS
NP_001276049.1 515 7.93e-36 REDKSPKEGK RGKQKKKERCWEDDDNDNLFLIKQRKKKS
NP_001276048.1 515 7.93e-36 REDKSPKEGK RGKQKKKERCWEDDDNDNLFLIKQRKKKS
XP_047278464.1 188 8.42e-21 PTRNPSRKRK KEKKKKKHRDRKSSDSDSSDSESDTGKRA RHTSKDSKAA
NP_057589.2 188 8.42e-21 PTRNPSRKRK KEKKKKKHRDRKSSDSDSSDSESDTGKRA RHTSKDSKAA
NP_001269500.1 126 8.42e-21 PTRNPSRKRK KEKKKKKHRDRKSSDSDSSDSESDTGKRA RHTSKDSKAA
NP_001269499.1 164 8.42e-21 PTRNPSRKRK KEKKKKKHRDRKSSDSDSSDSESDTGKRA RHTSKDSKAA
NP_001269498.1 180 8.42e-21 PTRNPSRKRK KEKKKKKHRDRKSSDSDSSDSESDTGKRA RHTSKDSKAA
NP_001269497.1 188 8.42e-21 PTRNPSRKRK KEKKKKKHRDRKSSDSDSSDSESDTGKRA RHTSKDSKAA
NP_001269496.1 190 8.42e-21 PTRNPSRKRK KEKKKKKHRDRKSSDSDSSDSESDTGKRA RHTSKDSKAA
NP_001269495.1 210 8.42e-21 PTRNPSRKRK KEKKKKKHRDRKSSDSDSSDSESDTGKRA RHTSKDSKAA
XP_047273784.1 58 2.12e-20 SLKNDAPQAK HKKNKKKKEYLNEDVNGFMEYLRQNSQMV HNGQIIATDS
XP_047273783.1 58 2.12e-20 SLKNDAPQAK HKKNKKKKEYLNEDVNGFMEYLRQNSQMV HNGQIIATDS
NP_115656.1 58 2.12e-20 SLKNDAPQAK HKKNKKKKEYLNEDVNGFMEYLRQNSQMV HNGQIIATDS
NP_001124508.1 58 2.12e-20 SLKNDAPQAK HKKNKKKKEYLNEDVNGFMEYLRQNSQMV HNGQIIATDS
NP_001124507.1 58 2.12e-20 SLKNDAPQAK HKKNKKKKEYLNEDVNGFMEYLRQNSQMV HNGQIIATDS
XP_011529314.1 207 5.33e-19 RMYANKQERL PNFLELIKMIREEEDWDDAFIKRKRPKRS EPIMERAASP
NP_001137450.1 207 5.33e-19 RMYANKQERL PNFLELIKMIREEEDWDDAFIKRKRPKRS EPIMERAASP
NP_776159.1 207 1.00e-18 RMYANEQERL PNFLELIRMVREEEDWDDAFIKRKRPKRS ESMVERAVSP
NP_001299820.1 207 1.00e-18 RMYANEQERL PNFLELIRMVREEEDWDDAFIKRKRPKRS ESMVERAVSP
--------------------------------------------------------------------------------
--------------------------------------------------------------------------------
	Motif RGKQKKKERCWEDDDNDNLFLIKQRKKKS MEME-6 block diagrams
--------------------------------------------------------------------------------
SEQUENCE NAME POSITION P-VALUE MOTIF DIAGRAM
------------- ---------------- -------------
XP_047279918.1 7.9e-36 224_[6]
XP_047279916.1 7.9e-36 316_[6]
XP_047279915.1 7.9e-36 316_[6]
XP_047279914.1 7.9e-36 482_[6]
XP_047279913.1 7.9e-36 482_[6]
XP_024303459.1 7.9e-36 316_[6]
XP_016870689.1 7.9e-36 316_[6]
XP_016870688.1 7.9e-36 316_[6]
XP_016870687.1 7.9e-36 482_[6]
XP_016870686.1 7.9e-36 482_[6]
XP_011516353.1 7.9e-36 320_[6]
XP_011516352.1 7.9e-36 482_[6]
XP_005251669.1 7.9e-36 514_[6]
XP_005251665.1 7.9e-36 514_[6]
NP_115602.2 7.9e-36 514_[6]
NP_001276050.1 7.9e-36 514_[6]
NP_001276049.1 7.9e-36 514_[6]
NP_001276048.1 7.9e-36 514_[6]
XP_047278464.1 8.4e-21 187_[6]_25
NP_057589.2 8.4e-21 187_[6]_25
NP_001269500.1 8.4e-21 125_[6]_25
NP_001269499.1 8.4e-21 163_[6]_25
NP_001269498.1 8.4e-21 179_[6]_25
NP_001269497.1 8.4e-21 187_[6]_25
NP_001269496.1 8.4e-21 189_[6]_25
NP_001269495.1 8.4e-21 209_[6]_25
XP_047273784.1 2.1e-20 57_[6]_185
XP_047273783.1 2.1e-20 57_[6]_185
NP_115656.1 2.1e-20 57_[6]_185
NP_001124508.1 2.1e-20 57_[6]_185
NP_001124507.1 2.1e-20 57_[6]_185
XP_011529314.1 5.3e-19 206_[6]_168
NP_001137450.1 5.3e-19 206_[6]_168
NP_776159.1 1e-18 206_[6]_167
NP_001299820.1 1e-18 206_[6]_167
--------------------------------------------------------------------------------
--------------------------------------------------------------------------------
	Motif RGKQKKKERCWEDDDNDNLFLIKQRKKKS MEME-6 in BLOCKS format
--------------------------------------------------------------------------------
BL MOTIF RGKQKKKERCWEDDDNDNLFLIKQRKKKS width=29 seqs=35
XP_047279918.1 ( 225) RGKQKKKERCWEDDDNDNLFLIKQRKKKS 1
XP_047279916.1 ( 317) RGKQKKKERCWEDDDNDNLFLIKQRKKKS 1
XP_047279915.1 ( 317) RGKQKKKERCWEDDDNDNLFLIKQRKKKS 1
XP_047279914.1 ( 483) RGKQKKKERCWEDDDNDNLFLIKQRKKKS 1
XP_047279913.1 ( 483) RGKQKKKERCWEDDDNDNLFLIKQRKKKS 1
XP_024303459.1 ( 317) RGKQKKKERCWEDDDNDNLFLIKQRKKKS 1
XP_016870689.1 ( 317) RGKQKKKERCWEDDDNDNLFLIKQRKKKS 1
XP_016870688.1 ( 317) RGKQKKKERCWEDDDNDNLFLIKQRKKKS 1
XP_016870687.1 ( 483) RGKQKKKERCWEDDDNDNLFLIKQRKKKS 1
XP_016870686.1 ( 483) RGKQKKKERCWEDDDNDNLFLIKQRKKKS 1
XP_011516353.1 ( 321) RGKQKKKERCWEDDDNDNLFLIKQRKKKS 1
XP_011516352.1 ( 483) RGKQKKKERCWEDDDNDNLFLIKQRKKKS 1
XP_005251669.1 ( 515) RGKQKKKERCWEDDDNDNLFLIKQRKKKS 1
XP_005251665.1 ( 515) RGKQKKKERCWEDDDNDNLFLIKQRKKKS 1
NP_115602.2 ( 515) RGKQKKKERCWEDDDNDNLFLIKQRKKKS 1
NP_001276050.1 ( 515) RGKQKKKERCWEDDDNDNLFLIKQRKKKS 1
NP_001276049.1 ( 515) RGKQKKKERCWEDDDNDNLFLIKQRKKKS 1
NP_001276048.1 ( 515) RGKQKKKERCWEDDDNDNLFLIKQRKKKS 1
XP_047278464.1 ( 188) KEKKKKKHRDRKSSDSDSSDSESDTGKRA 1
NP_057589.2 ( 188) KEKKKKKHRDRKSSDSDSSDSESDTGKRA 1
NP_001269500.1 ( 126) KEKKKKKHRDRKSSDSDSSDSESDTGKRA 1
NP_001269499.1 ( 164) KEKKKKKHRDRKSSDSDSSDSESDTGKRA 1
NP_001269498.1 ( 180) KEKKKKKHRDRKSSDSDSSDSESDTGKRA 1
NP_001269497.1 ( 188) KEKKKKKHRDRKSSDSDSSDSESDTGKRA 1
NP_001269496.1 ( 190) KEKKKKKHRDRKSSDSDSSDSESDTGKRA 1
NP_001269495.1 ( 210) KEKKKKKHRDRKSSDSDSSDSESDTGKRA 1
XP_047273784.1 ( 58) HKKNKKKKEYLNEDVNGFMEYLRQNSQMV 1
XP_047273783.1 ( 58) HKKNKKKKEYLNEDVNGFMEYLRQNSQMV 1
NP_115656.1 ( 58) HKKNKKKKEYLNEDVNGFMEYLRQNSQMV 1
NP_001124508.1 ( 58) HKKNKKKKEYLNEDVNGFMEYLRQNSQMV 1
NP_001124507.1 ( 58) HKKNKKKKEYLNEDVNGFMEYLRQNSQMV 1
XP_011529314.1 ( 207) PNFLELIKMIREEEDWDDAFIKRKRPKRS 1
NP_001137450.1 ( 207) PNFLELIKMIREEEDWDDAFIKRKRPKRS 1
NP_776159.1 ( 207) PNFLELIRMVREEEDWDDAFIKRKRPKRS 1
NP_001299820.1 ( 207) PNFLELIRMVREEEDWDDAFIKRKRPKRS 1
//
--------------------------------------------------------------------------------
--------------------------------------------------------------------------------
	Motif RGKQKKKERCWEDDDNDNLFLIKQRKKKS MEME-6 position-specific scoring matrix
--------------------------------------------------------------------------------
log-odds matrix: alength= 20 w= 29 n= 24214 bayes= 8.61972 E= 6.9e-491
-413 -625 -560 -440 -593 -504 210 -482 139 -467 -410 -386 66 -260 297 -515 -392 -465 -496 -470
-388 -635 -229 148 -583 309 -372 -608 62 -610 -564 145 -553 -353 -438 -390 -363 -568 -612 -488
-667 -753 -753 -784 200 -673 -624 -692 329 -680 -673 -676 -769 -644 -518 -789 -675 -711 -543 -427
-408 -623 -491 -429 -582 -483 -365 -484 138 62 -414 164 -594 348 -188 -498 -387 -467 -499 -466
-489 -669 -525 42 -654 -568 -499 -567 327 -584 -528 -482 -657 -402 -295 -616 -497 -572 -575 -576
-560 -692 -691 -656 -609 -622 -574 -559 329 62 -537 -574 -710 -504 -359 -698 -568 -598 -597 -599
-481 -613 -637 -605 -591 -578 -531 135 329 -540 -498 -510 -655 -470 -274 -640 -499 -470 -546 -562
-396 -640 -421 259 -599 -497 276 -487 120 -474 -417 -383 -586 -259 12 -509 -392 -464 -511 -480
-416 -640 -470 80 -583 -514 -403 -503 -231 -489 246 -412 -610 -292 350 -532 -418 -485 -521 -488
-393 398 197 -697 -308 -609 -560 85 -700 -320 -317 -586 -698 -616 -662 -620 -406 61 -436 238
-606 -694 -760 -742 -320 -674 -547 -422 -542 105 -381 -645 -759 -568 242 -744 -608 -506 550 -305
-349 -736 -220 292 -639 -439 -435 -545 127 -549 -488 164 -540 -278 -404 -468 -396 -489 -639 -544
-343 -743 313 175 -644 -426 -444 -559 -417 -568 -506 -293 -534 -284 -501 99 -394 -495 -673 -555
-362 -678 349 68 -614 -384 -412 -587 -435 -595 -541 -231 -545 -320 -505 101 -382 -530 -649 -525
-588 -719 396 -586 -670 -626 -671 -543 -801 -677 -676 -513 -762 -708 -753 -718 -642 157 -676 -673
-368 -582 -344 -509 -485 -402 -458 -657 -562 -659 -621 388 -614 -490 -584 106 -417 -581 331 -426
-660 -779 396 -689 -747 132 -687 -829 -809 -805 -818 -540 -773 -727 -775 -730 -681 -796 -712 -728
-401 -620 110 -396 226 -329 -363 -646 -459 -649 -617 351 -556 -392 -503 104 -358 -612 -610 -468
117 -460 -699 -702 -352 -432 -624 -297 -717 283 283 -574 -609 -575 -638 104 -376 -331 -504 -506
-437 -735 203 92 442 -492 -485 -613 -514 -607 -571 -364 -615 -387 -579 -534 -476 -571 -506 -361
-454 -545 -750 -728 -225 -645 -534 161 -720 285 -200 -624 -701 -579 -647 101 -462 -281 -374 238
-381 -554 -393 148 -379 -545 -482 367 34 102 -284 -468 -611 -351 -355 -557 -400 -243 -505 -472
-412 -624 -557 -442 -594 -503 -368 -484 247 -469 -412 -386 -601 -262 202 99 -392 -466 -498 -472
-414 -665 201 -303 -612 -425 -407 -569 38 -562 -509 -274 -587 385 -322 -463 -405 -537 -584 -512
-391 -605 -382 -473 -599 -429 -418 -571 -310 -563 -511 170 -608 -359 326 -463 232 -532 -569 -510
-270 -496 -395 -501 -590 196 -459 -575 246 -583 -518 -316 71 -412 -389 40 -363 -479 -591 -544
-489 -680 -617 -524 -645 -562 -451 -562 322 -548 -496 -466 -661 169 -267 -594 -473 -547 -561 -543
-414 -626 -564 -441 -593 -505 -367 -482 247 -467 277 -388 -601 -260 241 -516 -392 -465 -497 -471
217 -430 -684 -718 -592 -370 -666 -564 -761 -614 -532 -553 -576 -599 -662 251 -350 158 -627 -646
--------------------------------------------------------------------------------
--------------------------------------------------------------------------------
	Motif RGKQKKKERCWEDDDNDNLFLIKQRKKKS MEME-6 position-specific probability matrix
--------------------------------------------------------------------------------
letter-probability matrix: alength= 20 w= 29 nsites= 35 E= 6.9e-491
0.000000 0.000000 0.000000 0.000000 0.000000 0.000000 0.142857 0.000000 0.228571 0.000000 0.000000 0.000000 0.114286 0.000000 0.514286 0.000000 0.000000 0.000000 0.000000 0.000000
0.000000 0.000000 0.000000 0.228571 0.000000 0.514286 0.000000 0.000000 0.142857 0.000000 0.000000 0.114286 0.000000 0.000000 0.000000 0.000000 0.000000 0.000000 0.000000 0.000000
0.000000 0.000000 0.000000 0.000000 0.114286 0.000000 0.000000 0.000000 0.885714 0.000000 0.000000 0.000000 0.000000 0.000000 0.000000 0.000000 0.000000 0.000000 0.000000 0.000000
0.000000 0.000000 0.000000 0.000000 0.000000 0.000000 0.000000 0.000000 0.228571 0.114286 0.000000 0.142857 0.000000 0.514286 0.000000 0.000000 0.000000 0.000000 0.000000 0.000000
0.000000 0.000000 0.000000 0.114286 0.000000 0.000000 0.000000 0.000000 0.885714 0.000000 0.000000 0.000000 0.000000 0.000000 0.000000 0.000000 0.000000 0.000000 0.000000 0.000000
0.000000 0.000000 0.000000 0.000000 0.000000 0.000000 0.000000 0.000000 0.885714 0.114286 0.000000 0.000000 0.000000 0.000000 0.000000 0.000000 0.000000 0.000000 0.000000 0.000000
0.000000 0.000000 0.000000 0.000000 0.000000 0.000000 0.000000 0.114286 0.885714 0.000000 0.000000 0.000000 0.000000 0.000000 0.000000 0.000000 0.000000 0.000000 0.000000 0.000000
0.000000 0.000000 0.000000 0.514286 0.000000 0.000000 0.228571 0.000000 0.200000 0.000000 0.000000 0.000000 0.000000 0.000000 0.057143 0.000000 0.000000 0.000000 0.000000 0.000000
0.000000 0.000000 0.000000 0.142857 0.000000 0.000000 0.000000 0.000000 0.000000 0.000000 0.114286 0.000000 0.000000 0.000000 0.742857 0.000000 0.000000 0.000000 0.000000 0.000000
0.000000 0.514286 0.228571 0.000000 0.000000 0.000000 0.000000 0.057143 0.000000 0.000000 0.000000 0.000000 0.000000 0.000000 0.000000 0.000000 0.000000 0.057143 0.000000 0.142857
0.000000 0.000000 0.000000 0.000000 0.000000 0.000000 0.000000 0.000000 0.000000 0.142857 0.000000 0.000000 0.000000 0.000000 0.342857 0.000000 0.000000 0.000000 0.514286 0.000000
0.000000 0.000000 0.000000 0.628571 0.000000 0.000000 0.000000 0.000000 0.228571 0.000000 0.000000 0.142857 0.000000 0.000000 0.000000 0.000000 0.000000 0.000000 0.000000 0.000000
0.000000 0.000000 0.514286 0.257143 0.000000 0.000000 0.000000 0.000000 0.000000 0.000000 0.000000 0.000000 0.000000 0.000000 0.000000 0.228571 0.000000 0.000000 0.000000 0.000000
0.000000 0.000000 0.657143 0.114286 0.000000 0.000000 0.000000 0.000000 0.000000 0.000000 0.000000 0.000000 0.000000 0.000000 0.000000 0.228571 0.000000 0.000000 0.000000 0.000000
0.000000 0.000000 0.857143 0.000000 0.000000 0.000000 0.000000 0.000000 0.000000 0.000000 0.000000 0.000000 0.000000 0.000000 0.000000 0.000000 0.000000 0.142857 0.000000 0.000000
0.000000 0.000000 0.000000 0.000000 0.000000 0.000000 0.000000 0.000000 0.000000 0.000000 0.000000 0.657143 0.000000 0.000000 0.000000 0.228571 0.000000 0.000000 0.114286 0.000000
0.000000 0.000000 0.857143 0.000000 0.000000 0.142857 0.000000 0.000000 0.000000 0.000000 0.000000 0.000000 0.000000 0.000000 0.000000 0.000000 0.000000 0.000000 0.000000 0.000000
0.000000 0.000000 0.114286 0.000000 0.142857 0.000000 0.000000 0.000000 0.000000 0.000000 0.000000 0.514286 0.000000 0.000000 0.000000 0.228571 0.000000 0.000000 0.000000 0.000000
0.114286 0.000000 0.000000 0.000000 0.000000 0.000000 0.000000 0.000000 0.000000 0.514286 0.142857 0.000000 0.000000 0.000000 0.000000 0.228571 0.000000 0.000000 0.000000 0.000000
0.000000 0.000000 0.228571 0.142857 0.628571 0.000000 0.000000 0.000000 0.000000 0.000000 0.000000 0.000000 0.000000 0.000000 0.000000 0.000000 0.000000 0.000000 0.000000 0.000000
0.000000 0.000000 0.000000 0.000000 0.000000 0.000000 0.000000 0.114286 0.000000 0.514286 0.000000 0.000000 0.000000 0.000000 0.000000 0.228571 0.000000 0.000000 0.000000 0.142857
0.000000 0.000000 0.000000 0.228571 0.000000 0.000000 0.000000 0.514286 0.114286 0.142857 0.000000 0.000000 0.000000 0.000000 0.000000 0.000000 0.000000 0.000000 0.000000 0.000000
0.000000 0.000000 0.000000 0.000000 0.000000 0.000000 0.000000 0.000000 0.514286 0.000000 0.000000 0.000000 0.000000 0.000000 0.257143 0.228571 0.000000 0.000000 0.000000 0.000000
0.000000 0.000000 0.228571 0.000000 0.000000 0.000000 0.000000 0.000000 0.114286 0.000000 0.000000 0.000000 0.000000 0.657143 0.000000 0.000000 0.000000 0.000000 0.000000 0.000000
0.000000 0.000000 0.000000 0.000000 0.000000 0.000000 0.000000 0.000000 0.000000 0.000000 0.000000 0.142857 0.000000 0.000000 0.628571 0.000000 0.228571 0.000000 0.000000 0.000000
0.000000 0.000000 0.000000 0.000000 0.000000 0.228571 0.000000 0.000000 0.514286 0.000000 0.000000 0.000000 0.114286 0.000000 0.000000 0.142857 0.000000 0.000000 0.000000 0.000000
0.000000 0.000000 0.000000 0.000000 0.000000 0.000000 0.000000 0.000000 0.857143 0.000000 0.000000 0.000000 0.000000 0.142857 0.000000 0.000000 0.000000 0.000000 0.000000 0.000000
0.000000 0.000000 0.000000 0.000000 0.000000 0.000000 0.000000 0.000000 0.514286 0.000000 0.142857 0.000000 0.000000 0.000000 0.342857 0.000000 0.000000 0.000000 0.000000 0.000000
0.228571 0.000000 0.000000 0.000000 0.000000 0.000000 0.000000 0.000000 0.000000 0.000000 0.000000 0.000000 0.000000 0.000000 0.000000 0.628571 0.000000 0.142857 0.000000 0.000000
--------------------------------------------------------------------------------
--------------------------------------------------------------------------------
	Motif RGKQKKKERCWEDDDNDNLFLIKQRKKKS MEME-6 regular expression
--------------------------------------------------------------------------------
[RK][GE]K[QK]KKK[EHK]R[CD][WR][EK][DES][DS]D[NS]D[NS][LS][FD][LS][IE][KRS][QD][RT][KG]K[KR][SA]
--------------------------------------------------------------------------------
Time 88.12 secs.
********************************************************************************
********************************************************************************
MOTIF GINWSVSVKLIEAZIANBRTPGRWTQRYY MEME-7	width = 29 sites = 32 llr = 1878 E-value = 1.9e-484
********************************************************************************
--------------------------------------------------------------------------------
	Motif GINWSVSVKLIEAZIANBRTPGRWTQRYY MEME-7 Description
--------------------------------------------------------------------------------
Simplified A :::1::::::::6::6:1::1:::1:::1
pos.-specific C :::::::::::::::::::::::::::::
probability D 3::32::4:4:::::::3:::::::::1:
matrix E :1:::::::::5:3:::::::::::2:::
F :::::::::::::::::::::::::::::
G 5:3::::::::3:::::::::7:::::::
H :::::::::::::::::::::::::::::
I :4:::4::1:7:::5:::13::11:::::
K ::1:3:2:7::2:::3::::3:::::4::
L ::2::1::253:::1::::::::4:::::
M ::::::::::::::3::::::::::3:::
N ::4:::::::::::::a5:::::::::::
P ::::::::::::::::::::6::::::::
Q :::::::::::::7:1:::1:::::5:::
R :::::::::1::3:::::8:::6:::5::
S 2:::5:4:::::::::::::::3:3::::
T :2:::::2:::::::::::6::::5::::
V :3:::5:4::::1::::::::3:::::33
W :::5::3::::::::::::::::5:::::
Y ::::::1::::::::::::::::::::55
bits 6.5
5.8
5.2
4.5 *
Relative 3.9 * * *
Entropy 3.2 * * ** * ** * * * **
(84.7 bits) 2.6 ** * ************************
1.9 *****************************
1.3 *****************************
0.6 *****************************
0.0 -----------------------------
Multilevel GINWSVSVKLIEAQIANNRTPGRWTQRYY
consensus DVGDKIWD DLGREMK D IKVSLSMKVV
sequence
--------------------------------------------------------------------------------
--------------------------------------------------------------------------------
	Motif GINWSVSVKLIEAZIANBRTPGRWTQRYY MEME-7 sites sorted by position p-value
--------------------------------------------------------------------------------
Sequence name Start P-value Site
------------- ----- --------- -----------------------------
XP_047279914.1 207 9.19e-36 CENSVTEGED GINWSISDKDIEAQIANNRTPGRWTQRYY SANKNIICRN
XP_047279913.1 207 9.19e-36 CENSVTEGED GINWSISDKDIEAQIANNRTPGRWTQRYY SANKNIICRN
XP_016870687.1 207 9.19e-36 CENSVTEGED GINWSISDKDIEAQIANNRTPGRWTQRYY SANKNIICRN
XP_016870686.1 207 9.19e-36 CENSVTEGED GINWSISDKDIEAQIANNRTPGRWTQRYY SANKNIICRN
XP_011516353.1 13 9.19e-36 DCTSYIPGED GINWSISDKDIEAQIANNRTPGRWTQRYY SANKNIICRN
XP_011516352.1 207 9.19e-36 CENSVTEGED GINWSISDKDIEAQIANNRTPGRWTQRYY SANKNIICRN
XP_005251669.1 207 9.19e-36 CENSVTEGED GINWSISDKDIEAQIANNRTPGRWTQRYY SANKNIICRN
XP_005251665.1 207 9.19e-36 CENSVTEGED GINWSISDKDIEAQIANNRTPGRWTQRYY SANKNIICRN
NP_115602.2 207 9.19e-36 CENSVTEGED GINWSISDKDIEAQIANNRTPGRWTQRYY SANKNIICRN
NP_001276050.1 207 9.19e-36 CENSVTEGED GINWSISDKDIEAQIANNRTPGRWTQRYY SANKNIICRN
NP_001276049.1 207 9.19e-36 CENSVTEGED GINWSISDKDIEAQIANNRTPGRWTQRYY SANKNIICRN
NP_001276048.1 207 9.19e-36 CENSVTEGED GINWSISDKDIEAQIANNRTPGRWTQRYY SANKNIICRN
XP_047279916.1 9 2.77e-28 MIKMMISF STLWDVKTLLLKAQIANNRTPGRWTQRYY SANKNIICRN
XP_047279915.1 9 2.77e-28 MIKMMISF STLWDVKTLLLKAQIANNRTPGRWTQRYY SANKNIICRN
XP_024303459.1 9 2.77e-28 MIKMMISF STLWDVKTLLLKAQIANNRTPGRWTQRYY SANKNIICRN
XP_016870689.1 9 2.77e-28 MIKMMISF STLWDVKTLLLKAQIANNRTPGRWTQRYY SANKNIICRN
XP_016870688.1 9 2.77e-28 MIKMMISF STLWDVKTLLLKAQIANNRTPGRWTQRYY SANKNIICRN
XP_047278464.1 62 7.76e-26 CRVDKPSEIV DVGDKVWVKLIGREMKNDRIKVSLSMKVV NQGTGKDLDP
NP_057589.2 62 7.76e-26 CRVDKPSEIV DVGDKVWVKLIGREMKNDRIKVSLSMKVV NQGTGKDLDP
NP_001269503.1 62 7.76e-26 CRVDKPSEIV DVGDKVWVKLIGREMKNDRIKVSLSMKVV NQGTGKDLDP
NP_001269502.1 54 7.76e-26 CRVDKPSEIV DVGDKVWVKLIGREMKNDRIKVSLSMKVV NQGTGKDLDP
NP_001269501.1 62 7.76e-26 CRVDKPSEIV DVGDKVWVKLIGREMKNDRIKVSLSMKVV NQGTGKDLDP
NP_001269499.1 38 7.76e-26 CRVDKPSEIV DVGDKVWVKLIGREMKNDRIKVSLSMKVV NQGTGKDLDP
NP_001269498.1 54 7.76e-26 CRVDKPSEIV DVGDKVWVKLIGREMKNDRIKVSLSMKVV NQGTGKDLDP
NP_001269497.1 62 7.76e-26 CRVDKPSEIV DVGDKVWVKLIGREMKNDRIKVSLSMKVV NQGTGKDLDP
NP_001269496.1 38 7.76e-26 CRVDKPSEIV DVGDKVWVKLIGREMKNDRIKVSLSMKVV NQGTGKDLDP
NP_001269495.1 84 7.76e-26 CRVDKPSEIV DVGDKVWVKLIGREMKNDRIKVSLSMKVV NQGTGKDLDP
XP_011529314.1 142 8.45e-19 GKFFNTLQAQ GEKASLYVIRLEVQLQNAIQAGILAEKDA NQTRLQQLLL
NP_001137450.1 142 8.45e-19 GKFFNTLQAQ GEKASLYVIRLEVQLQNAIQAGILAEKDA NQTRLQQLLL
NP_776159.1 142 1.86e-18 GKFFNTLQAQ GEKASLYVIRLEVQLQNAIQAGIIAEKDA NRTRLQQLLL
NP_001299820.1 142 1.86e-18 GKFFNTLQAQ GEKASLYVIRLEVQLQNAIQAGIIAEKDA NRTRLQQLLL
NP_149080.2 116 2.76e-11 GEAVDPRKKK GAAEAGRRKKAEAAAAAMATPARPGEAED AAERPLQDEP
--------------------------------------------------------------------------------
--------------------------------------------------------------------------------
	Motif GINWSVSVKLIEAZIANBRTPGRWTQRYY MEME-7 block diagrams
--------------------------------------------------------------------------------
SEQUENCE NAME POSITION P-VALUE MOTIF DIAGRAM
------------- ---------------- -------------
XP_047279914.1 9.2e-36 206_[7]_276
XP_047279913.1 9.2e-36 206_[7]_276
XP_016870687.1 9.2e-36 206_[7]_276
XP_016870686.1 9.2e-36 206_[7]_276
XP_011516353.1 9.2e-36 12_[7]_308
XP_011516352.1 9.2e-36 206_[7]_276
XP_005251669.1 9.2e-36 206_[7]_308
XP_005251665.1 9.2e-36 206_[7]_308
NP_115602.2 9.2e-36 206_[7]_308
NP_001276050.1 9.2e-36 206_[7]_308
NP_001276049.1 9.2e-36 206_[7]_308
NP_001276048.1 9.2e-36 206_[7]_308
XP_047279916.1 2.8e-28 8_[7]_308
XP_047279915.1 2.8e-28 8_[7]_308
XP_024303459.1 2.8e-28 8_[7]_308
XP_016870689.1 2.8e-28 8_[7]_308
XP_016870688.1 2.8e-28 8_[7]_308
XP_047278464.1 7.8e-26 61_[7]_151
NP_057589.2 7.8e-26 61_[7]_151
NP_001269503.1 7.8e-26 61_[7]_56
NP_001269502.1 7.8e-26 53_[7]_78
NP_001269501.1 7.8e-26 61_[7]_78
NP_001269499.1 7.8e-26 37_[7]_151
NP_001269498.1 7.8e-26 53_[7]_151
NP_001269497.1 7.8e-26 61_[7]_151
NP_001269496.1 7.8e-26 37_[7]_177
NP_001269495.1 7.8e-26 83_[7]_151
XP_011529314.1 8.5e-19 141_[7]_233
NP_001137450.1 8.5e-19 141_[7]_233
NP_776159.1 1.9e-18 141_[7]_232
NP_001299820.1 1.9e-18 141_[7]_232
NP_149080.2 2.8e-11 115_[7]_259
--------------------------------------------------------------------------------
--------------------------------------------------------------------------------
	Motif GINWSVSVKLIEAZIANBRTPGRWTQRYY MEME-7 in BLOCKS format
--------------------------------------------------------------------------------
BL MOTIF GINWSVSVKLIEAZIANBRTPGRWTQRYY width=29 seqs=32
XP_047279914.1 ( 207) GINWSISDKDIEAQIANNRTPGRWTQRYY 1
XP_047279913.1 ( 207) GINWSISDKDIEAQIANNRTPGRWTQRYY 1
XP_016870687.1 ( 207) GINWSISDKDIEAQIANNRTPGRWTQRYY 1
XP_016870686.1 ( 207) GINWSISDKDIEAQIANNRTPGRWTQRYY 1
XP_011516353.1 ( 13) GINWSISDKDIEAQIANNRTPGRWTQRYY 1
XP_011516352.1 ( 207) GINWSISDKDIEAQIANNRTPGRWTQRYY 1
XP_005251669.1 ( 207) GINWSISDKDIEAQIANNRTPGRWTQRYY 1
XP_005251665.1 ( 207) GINWSISDKDIEAQIANNRTPGRWTQRYY 1
NP_115602.2 ( 207) GINWSISDKDIEAQIANNRTPGRWTQRYY 1
NP_001276050.1 ( 207) GINWSISDKDIEAQIANNRTPGRWTQRYY 1
NP_001276049.1 ( 207) GINWSISDKDIEAQIANNRTPGRWTQRYY 1
NP_001276048.1 ( 207) GINWSISDKDIEAQIANNRTPGRWTQRYY 1
XP_047279916.1 ( 9) STLWDVKTLLLKAQIANNRTPGRWTQRYY 1
XP_047279915.1 ( 9) STLWDVKTLLLKAQIANNRTPGRWTQRYY 1
XP_024303459.1 ( 9) STLWDVKTLLLKAQIANNRTPGRWTQRYY 1
XP_016870689.1 ( 9) STLWDVKTLLLKAQIANNRTPGRWTQRYY 1
XP_016870688.1 ( 9) STLWDVKTLLLKAQIANNRTPGRWTQRYY 1
XP_047278464.1 ( 62) DVGDKVWVKLIGREMKNDRIKVSLSMKVV 1
NP_057589.2 ( 62) DVGDKVWVKLIGREMKNDRIKVSLSMKVV 1
NP_001269503.1 ( 62) DVGDKVWVKLIGREMKNDRIKVSLSMKVV 1
NP_001269502.1 ( 54) DVGDKVWVKLIGREMKNDRIKVSLSMKVV 1
NP_001269501.1 ( 62) DVGDKVWVKLIGREMKNDRIKVSLSMKVV 1
NP_001269499.1 ( 38) DVGDKVWVKLIGREMKNDRIKVSLSMKVV 1
NP_001269498.1 ( 54) DVGDKVWVKLIGREMKNDRIKVSLSMKVV 1
NP_001269497.1 ( 62) DVGDKVWVKLIGREMKNDRIKVSLSMKVV 1
NP_001269496.1 ( 38) DVGDKVWVKLIGREMKNDRIKVSLSMKVV 1
NP_001269495.1 ( 84) DVGDKVWVKLIGREMKNDRIKVSLSMKVV 1
XP_011529314.1 ( 142) GEKASLYVIRLEVQLQNAIQAGILAEKDA 1
NP_001137450.1 ( 142) GEKASLYVIRLEVQLQNAIQAGILAEKDA 1
NP_776159.1 ( 142) GEKASLYVIRLEVQLQNAIQAGIIAEKDA 1
NP_001299820.1 ( 142) GEKASLYVIRLEVQLQNAIQAGIIAEKDA 1
NP_149080.2 ( 116) GAAEAGRRKKAEAAAAAMATPARPGEAED 1
//
--------------------------------------------------------------------------------
--------------------------------------------------------------------------------
	Motif GINWSVSVKLIEAZIANBRTPGRWTQRYY MEME-7 position-specific scoring matrix
--------------------------------------------------------------------------------
log-odds matrix: alength= 20 w= 29 n= 24214 bayes= 10.8847 E= 1.9e-484
-327 -549 246 -439 -584 316 -408 -635 -503 -646 -598 -208 -566 -431 -536 52 -364 -551 -620 -515
-63 -451 -664 55 -366 -582 -611 327 -662 -288 -278 -576 -664 -586 -631 -589 176 274 -519 -465
-60 -551 -265 -397 -537 238 -365 -527 46 106 -486 305 -544 -344 -352 -376 -339 -487 -555 -464
124 -578 245 -81 -555 -373 -424 -580 -456 -591 -534 -246 -548 -349 -509 -407 -369 -505 548 -489
-58 -551 149 -370 -560 -334 -374 -583 172 -589 -535 -187 -543 -367 -420 214 -342 -521 -587 -481
-416 -493 -750 -750 -410 -94 -759 330 -764 84 -310 -671 -751 -708 -755 -713 -420 330 -633 -560
-429 -609 -546 -467 -270 -515 -356 -475 86 -456 -414 -396 -612 -296 -57 170 -411 -466 471 221
-294 -496 269 -396 -479 -380 -439 -315 -440 -448 -416 -276 -568 -408 -97 -408 178 315 -554 -483
-470 -573 -713 -623 -312 -643 -543 174 292 122 -225 -566 -706 -449 -389 -668 -466 -247 -488 -480
-396 -614 266 -386 -559 -457 -361 -474 -81 263 -410 -322 -581 -264 106 -477 -377 -459 -497 -458
-73 -541 -801 -791 -302 -718 -727 412 -800 201 -213 -717 -756 -662 -747 -753 -473 -174 -514 -514
-339 -741 -219 270 -648 234 -456 -541 73 -546 -484 -352 -537 -273 -421 -484 -403 -480 -646 -561
341 -431 -662 -668 -561 -374 -613 -455 -565 -552 -493 -532 -574 -536 226 -388 -348 139 -602 -604
-61 -762 -192 203 -656 -469 -465 -524 -391 -531 -463 -396 -517 379 -476 -487 -395 -456 -666 -578
-74 -564 -832 -801 -265 -732 -693 375 -806 101 394 -732 -750 -632 -727 -771 -496 -238 -471 -486
334 -552 -525 -439 -581 -452 -390 -494 178 -484 -425 -390 -585 150 -212 -465 -374 -453 -511 -485
-126 -461 -299 -513 -401 -386 -220 -353 -457 -458 -384 440 -504 -356 -451 -319 -293 -401 -381 -396
122 -578 246 -379 -562 -321 -363 -618 -453 -628 59 355 -544 -385 -495 -363 -344 -565 -607 -476
-133 -404 -500 -521 -449 -419 -298 74 -243 -399 -376 -368 -464 -293 377 -457 -367 -393 -331 -425
-322 -471 -585 -621 -417 -496 -571 295 -553 -356 -333 -449 -622 141 -530 -378 365 -219 -529 -496
112 -483 -455 -462 -460 -400 -450 -434 153 -437 -418 -427 313 -380 -399 -390 -326 -388 -520 -504
-29 -426 -644 -692 -569 349 -646 -464 -729 -572 -507 -531 -571 -588 -641 -382 -346 268 -608 -623
-293 -510 -586 -554 -540 -437 -483 167 -337 -512 -467 -457 -606 -394 311 149 -391 -421 -550 -509
-525 -592 -857 -820 -243 -746 -664 85 -820 244 -166 -748 -117 -622 -722 -793 -529 -306 550 -433
133 -413 -621 -670 -553 -74 -614 -513 -680 -579 -473 -477 -557 -547 -607 149 357 -403 -584 -605
-332 -746 -219 117 -594 -480 -471 -509 -371 -506 387 -403 -535 351 -425 -501 -407 -462 -627 -540
-70 -612 -551 -430 -583 -493 -356 -471 225 -456 -399 -377 -589 -249 301 -503 -381 -453 -486 -460
-422 -600 116 -106 -210 -467 -389 -410 -518 -469 -453 -326 -613 -412 -541 -499 -436 266 -310 426
128 -466 -85 -630 -257 -439 -475 -298 -665 -421 -397 -491 -612 -551 -608 -453 -381 269 -360 427
--------------------------------------------------------------------------------
--------------------------------------------------------------------------------
	Motif GINWSVSVKLIEAZIANBRTPGRWTQRYY MEME-7 position-specific probability matrix
--------------------------------------------------------------------------------
letter-probability matrix: alength= 20 w= 29 nsites= 32 E= 1.9e-484
0.000000 0.000000 0.312500 0.000000 0.000000 0.531250 0.000000 0.000000 0.000000 0.000000 0.000000 0.000000 0.000000 0.000000 0.000000 0.156250 0.000000 0.000000 0.000000 0.000000
0.031250 0.000000 0.000000 0.125000 0.000000 0.000000 0.000000 0.375000 0.000000 0.000000 0.000000 0.000000 0.000000 0.000000 0.000000 0.000000 0.156250 0.312500 0.000000 0.000000
0.031250 0.000000 0.000000 0.000000 0.000000 0.312500 0.000000 0.000000 0.125000 0.156250 0.000000 0.375000 0.000000 0.000000 0.000000 0.000000 0.000000 0.000000 0.000000 0.000000
0.125000 0.000000 0.312500 0.031250 0.000000 0.000000 0.000000 0.000000 0.000000 0.000000 0.000000 0.000000 0.000000 0.000000 0.000000 0.000000 0.000000 0.000000 0.531250 0.000000
0.031250 0.000000 0.156250 0.000000 0.000000 0.000000 0.000000 0.000000 0.312500 0.000000 0.000000 0.000000 0.000000 0.000000 0.000000 0.500000 0.000000 0.000000 0.000000 0.000000
0.000000 0.000000 0.000000 0.000000 0.000000 0.031250 0.000000 0.375000 0.000000 0.125000 0.000000 0.000000 0.000000 0.000000 0.000000 0.000000 0.000000 0.468750 0.000000 0.000000
0.000000 0.000000 0.000000 0.000000 0.000000 0.000000 0.000000 0.000000 0.156250 0.000000 0.000000 0.000000 0.000000 0.000000 0.031250 0.375000 0.000000 0.000000 0.312500 0.125000
0.000000 0.000000 0.375000 0.000000 0.000000 0.000000 0.000000 0.000000 0.000000 0.000000 0.000000 0.000000 0.000000 0.000000 0.031250 0.000000 0.156250 0.437500 0.000000 0.000000
0.000000 0.000000 0.000000 0.000000 0.000000 0.000000 0.000000 0.125000 0.718750 0.156250 0.000000 0.000000 0.000000 0.000000 0.000000 0.000000 0.000000 0.000000 0.000000 0.000000
0.000000 0.000000 0.375000 0.000000 0.000000 0.000000 0.000000 0.000000 0.031250 0.468750 0.000000 0.000000 0.000000 0.000000 0.125000 0.000000 0.000000 0.000000 0.000000 0.000000
0.031250 0.000000 0.000000 0.000000 0.000000 0.000000 0.000000 0.687500 0.000000 0.281250 0.000000 0.000000 0.000000 0.000000 0.000000 0.000000 0.000000 0.000000 0.000000 0.000000
0.000000 0.000000 0.000000 0.531250 0.000000 0.312500 0.000000 0.000000 0.156250 0.000000 0.000000 0.000000 0.000000 0.000000 0.000000 0.000000 0.000000 0.000000 0.000000 0.000000
0.562500 0.000000 0.000000 0.000000 0.000000 0.000000 0.000000 0.000000 0.000000 0.000000 0.000000 0.000000 0.000000 0.000000 0.312500 0.000000 0.000000 0.125000 0.000000 0.000000
0.031250 0.000000 0.000000 0.312500 0.000000 0.000000 0.000000 0.000000 0.000000 0.000000 0.000000 0.000000 0.000000 0.656250 0.000000 0.000000 0.000000 0.000000 0.000000 0.000000
0.031250 0.000000 0.000000 0.000000 0.000000 0.000000 0.000000 0.531250 0.000000 0.125000 0.312500 0.000000 0.000000 0.000000 0.000000 0.000000 0.000000 0.000000 0.000000 0.000000
0.562500 0.000000 0.000000 0.000000 0.000000 0.000000 0.000000 0.000000 0.312500 0.000000 0.000000 0.000000 0.000000 0.125000 0.000000 0.000000 0.000000 0.000000 0.000000 0.000000
0.031250 0.000000 0.000000 0.000000 0.000000 0.000000 0.000000 0.000000 0.000000 0.000000 0.000000 0.968750 0.000000 0.000000 0.000000 0.000000 0.000000 0.000000 0.000000 0.000000
0.125000 0.000000 0.312500 0.000000 0.000000 0.000000 0.000000 0.000000 0.000000 0.000000 0.031250 0.531250 0.000000 0.000000 0.000000 0.000000 0.000000 0.000000 0.000000 0.000000
0.031250 0.000000 0.000000 0.000000 0.000000 0.000000 0.000000 0.125000 0.000000 0.000000 0.000000 0.000000 0.000000 0.000000 0.843750 0.000000 0.000000 0.000000 0.000000 0.000000
0.000000 0.000000 0.000000 0.000000 0.000000 0.000000 0.000000 0.312500 0.000000 0.000000 0.000000 0.000000 0.000000 0.125000 0.000000 0.000000 0.562500 0.000000 0.000000 0.000000
0.125000 0.000000 0.000000 0.000000 0.000000 0.000000 0.000000 0.000000 0.312500 0.000000 0.000000 0.000000 0.562500 0.000000 0.000000 0.000000 0.000000 0.000000 0.000000 0.000000
0.031250 0.000000 0.000000 0.000000 0.000000 0.656250 0.000000 0.000000 0.000000 0.000000 0.000000 0.000000 0.000000 0.000000 0.000000 0.000000 0.000000 0.312500 0.000000 0.000000
0.000000 0.000000 0.000000 0.000000 0.000000 0.000000 0.000000 0.125000 0.000000 0.000000 0.000000 0.000000 0.000000 0.000000 0.562500 0.312500 0.000000 0.000000 0.000000 0.000000
0.000000 0.000000 0.000000 0.000000 0.000000 0.000000 0.000000 0.062500 0.000000 0.375000 0.000000 0.000000 0.031250 0.000000 0.000000 0.000000 0.000000 0.000000 0.531250 0.000000
0.125000 0.000000 0.000000 0.000000 0.000000 0.031250 0.000000 0.000000 0.000000 0.000000 0.000000 0.000000 0.000000 0.000000 0.000000 0.312500 0.531250 0.000000 0.000000 0.000000
0.000000 0.000000 0.000000 0.156250 0.000000 0.000000 0.000000 0.000000 0.000000 0.000000 0.312500 0.000000 0.000000 0.531250 0.000000 0.000000 0.000000 0.000000 0.000000 0.000000
0.031250 0.000000 0.000000 0.000000 0.000000 0.000000 0.000000 0.000000 0.437500 0.000000 0.000000 0.000000 0.000000 0.000000 0.531250 0.000000 0.000000 0.000000 0.000000 0.000000
0.000000 0.000000 0.125000 0.031250 0.000000 0.000000 0.000000 0.000000 0.000000 0.000000 0.000000 0.000000 0.000000 0.000000 0.000000 0.000000 0.000000 0.312500 0.000000 0.531250
0.125000 0.000000 0.031250 0.000000 0.000000 0.000000 0.000000 0.000000 0.000000 0.000000 0.000000 0.000000 0.000000 0.000000 0.000000 0.000000 0.000000 0.312500 0.000000 0.531250
--------------------------------------------------------------------------------
--------------------------------------------------------------------------------
	Motif GINWSVSVKLIEAZIANBRTPGRWTQRYY MEME-7 regular expression
--------------------------------------------------------------------------------
[GD][IV][NG][WD][SK][VI][SW][VD]K[LD][IL][EG][AR][QE][IM][AK]N[ND]R[TI][PK][GV][RS][WL][TS][QM][RK][YV][YV]
--------------------------------------------------------------------------------
Time 100.70 secs.
********************************************************************************
********************************************************************************
MOTIF IEAYEDDLYRDESSSELSVDSEVEFQLYSQIHYAQDLDDVIREEEHEEKN MEME-8	width = 50 sites = 17 llr = 1985 E-value = 9.7e-511
********************************************************************************
--------------------------------------------------------------------------------
	Motif IEAYEDDLYRDESSSELSVDSEVEFQLYSQIHYAQDLDDVIREEEHEEKN MEME-8 Description
--------------------------------------------------------------------------------
Simplified A ::a4:::4::::::::::::::::::::4::::6::::::::::::::::
pos.-specific C ::::::::::::::::::::::::::::::::4:::::::::::::::::
probability D :::::66:::6::4:4:::a:::::::::::::::6:a6:::::::::::
matrix E :6::64::4::6:::6:::::6:6:::::::::::4::::::a66:6a::
F ::::::::::::::::::::::::6:::::::::::::::::::::::::
G ::::::::::::::::::::::::4::::::::::::::::::4::::::
H :::::::::::::::::::::::::::::::6:::::::::::::6::::
I a:::::::::::::::::::::::::::::6:::::::::6:::::::::
K ::::::::::::::::::::::::::::::::::::::::::::4:::a:
L ::::4::6::::::::6:::::4:::6:::::::::a:4:::::::::::
M ::::::::::::::::::::::::::::::::::::::::::::::::::
N :::::::::::4:::::::::::::4::::::::4::::::::::::::6
P :::::::::::::::::4:::4:::::::::4:4:::::4:4::::::::
Q ::::::4::::::::::::::::::6:::6::::6::::::::::::::4
R :::::::::6:::::::::::::::::::::::::::::::6::::::::
S :::::::::4::a6a::6::6:::::4:644:::::::::::::::4:::
T ::::::::::::::::::::4::4:::::::::::::::::::::4::::
V ::::::::::4:::::4:a:::6::::4:::::::::::64:::::::::
W :4::::::::::::::::::::::::::::::::::::::::::::::::
Y :::6::::6::::::::::::::::::6::::6:::::::::::::::::
bits 6.5
5.8
5.2
4.5 * * * *
Relative 3.9 **** * ** ** * ** * ** * * * * *
Entropy 3.2 **** **** *** * * ** **** * ************** * ***
(168.4 bits) 2.6 **************************************************
1.9 **************************************************
1.3 **************************************************
0.6 **************************************************
0.0 --------------------------------------------------
Multilevel IEAYEDDLYRDESSSELSVDSEVEFQLYSQIHYAQDLDDVIREEEHEEKN
consensus W ALEQAESVN D DVP TPLTGNSVASSPCPNE LPVP GKTS Q
sequence
--------------------------------------------------------------------------------
--------------------------------------------------------------------------------
	Motif IEAYEDDLYRDESSSELSVDSEVEFQLYSQIHYAQDLDDVIREEEHEEKN MEME-8 sites sorted by position p-value
--------------------------------------------------------------------------------
Sequence name Start P-value Site
------------- ----- --------- --------------------------------------------------
XP_047279914.1 9 4.21e-60 MMFGGYET IEAYEDDLYRDESSSELSVDSEVEFQLYSQIHYAQDLDDVIREEEHEEKN SGNSESSSSK
XP_047279913.1 9 4.21e-60 MMFGGYET IEAYEDDLYRDESSSELSVDSEVEFQLYSQIHYAQDLDDVIREEEHEEKN SGNSESSSSK
XP_016870687.1 9 4.21e-60 MMFGGYET IEAYEDDLYRDESSSELSVDSEVEFQLYSQIHYAQDLDDVIREEEHEEKN SGNSESSSSK
XP_016870686.1 9 4.21e-60 MMFGGYET IEAYEDDLYRDESSSELSVDSEVEFQLYSQIHYAQDLDDVIREEEHEEKN SGNSESSSSK
XP_011516352.1 9 4.21e-60 MMFGGYET IEAYEDDLYRDESSSELSVDSEVEFQLYSQIHYAQDLDDVIREEEHEEKN SGNSESSSSK
XP_005251669.1 9 4.21e-60 MMFGGYET IEAYEDDLYRDESSSELSVDSEVEFQLYSQIHYAQDLDDVIREEEHEEKN SGNSESSSSK
XP_005251665.1 9 4.21e-60 MMFGGYET IEAYEDDLYRDESSSELSVDSEVEFQLYSQIHYAQDLDDVIREEEHEEKN SGNSESSSSK
NP_115602.2 9 4.21e-60 MMFGGYET IEAYEDDLYRDESSSELSVDSEVEFQLYSQIHYAQDLDDVIREEEHEEKN SGNSESSSSK
NP_001276050.1 9 4.21e-60 MMFGGYET IEAYEDDLYRDESSSELSVDSEVEFQLYSQIHYAQDLDDVIREEEHEEKN SGNSESSSSK
NP_001276049.1 9 4.21e-60 MMFGGYET IEAYEDDLYRDESSSELSVDSEVEFQLYSQIHYAQDLDDVIREEEHEEKN SGNSESSSSK
NP_001276048.1 9 4.21e-60 MMFGGYET IEAYEDDLYRDESSSELSVDSEVEFQLYSQIHYAQDLDDVIREEEHEEKN SGNSESSSSK
XP_047285073.1 436 1.46e-44 LEELEEQQRR IWAALEQAESVNSDSDVPVDTPLTGNSVASSPCPNELDLPVPEGKTSEKQ TLDEPEVPEI
NP_060082.2 527 1.46e-44 LEELEEQQRR IWAALEQAESVNSDSDVPVDTPLTGNSVASSPCPNELDLPVPEGKTSEKQ TLDEPEVPEI
NP_001337867.1 289 1.46e-44 LEELEEQQRR IWAALEQAESVNSDSDVPVDTPLTGNSVASSPCPNELDLPVPEGKTSEKQ TLDEPEVPEI
NP_001337866.1 289 1.46e-44 LEELEEQQRR IWAALEQAESVNSDSDVPVDTPLTGNSVASSPCPNELDLPVPEGKTSEKQ TLDEPEVPEI
NP_001337865.1 428 1.46e-44 LEELEEQQRR IWAALEQAESVNSDSDVPVDTPLTGNSVASSPCPNELDLPVPEGKTSEKQ TLDEPEVPEI
NP_001337864.1 450 1.46e-44 LEELEEQQRR IWAALEQAESVNSDSDVPVDTPLTGNSVASSPCPNELDLPVPEGKTSEKQ TLDEPEVPEI
--------------------------------------------------------------------------------
--------------------------------------------------------------------------------
	Motif IEAYEDDLYRDESSSELSVDSEVEFQLYSQIHYAQDLDDVIREEEHEEKN MEME-8 block diagrams
--------------------------------------------------------------------------------
SEQUENCE NAME POSITION P-VALUE MOTIF DIAGRAM
------------- ---------------- -------------
XP_047279914.1 4.2e-60 8_[8]_453
XP_047279913.1 4.2e-60 8_[8]_453
XP_016870687.1 4.2e-60 8_[8]_453
XP_016870686.1 4.2e-60 8_[8]_453
XP_011516352.1 4.2e-60 8_[8]_453
XP_005251669.1 4.2e-60 8_[8]_485
XP_005251665.1 4.2e-60 8_[8]_485
NP_115602.2 4.2e-60 8_[8]_485
NP_001276050.1 4.2e-60 8_[8]_485
NP_001276049.1 4.2e-60 8_[8]_485
NP_001276048.1 4.2e-60 8_[8]_485
XP_047285073.1 1.5e-44 435_[8]_131
NP_060082.2 1.5e-44 526_[8]_131
NP_001337867.1 1.5e-44 288_[8]_131
NP_001337866.1 1.5e-44 288_[8]_131
NP_001337865.1 1.5e-44 427_[8]_131
NP_001337864.1 1.5e-44 449_[8]_131
--------------------------------------------------------------------------------
--------------------------------------------------------------------------------
	Motif IEAYEDDLYRDESSSELSVDSEVEFQLYSQIHYAQDLDDVIREEEHEEKN MEME-8 in BLOCKS format
--------------------------------------------------------------------------------
BL MOTIF IEAYEDDLYRDESSSELSVDSEVEFQLYSQIHYAQDLDDVIREEEHEEKN width=50 seqs=17
XP_047279914.1 ( 9) IEAYEDDLYRDESSSELSVDSEVEFQLYSQIHYAQDLDDVIREEEHEEKN 1
XP_047279913.1 ( 9) IEAYEDDLYRDESSSELSVDSEVEFQLYSQIHYAQDLDDVIREEEHEEKN 1
XP_016870687.1 ( 9) IEAYEDDLYRDESSSELSVDSEVEFQLYSQIHYAQDLDDVIREEEHEEKN 1
XP_016870686.1 ( 9) IEAYEDDLYRDESSSELSVDSEVEFQLYSQIHYAQDLDDVIREEEHEEKN 1
XP_011516352.1 ( 9) IEAYEDDLYRDESSSELSVDSEVEFQLYSQIHYAQDLDDVIREEEHEEKN 1
XP_005251669.1 ( 9) IEAYEDDLYRDESSSELSVDSEVEFQLYSQIHYAQDLDDVIREEEHEEKN 1
XP_005251665.1 ( 9) IEAYEDDLYRDESSSELSVDSEVEFQLYSQIHYAQDLDDVIREEEHEEKN 1
NP_115602.2 ( 9) IEAYEDDLYRDESSSELSVDSEVEFQLYSQIHYAQDLDDVIREEEHEEKN 1
NP_001276050.1 ( 9) IEAYEDDLYRDESSSELSVDSEVEFQLYSQIHYAQDLDDVIREEEHEEKN 1
NP_001276049.1 ( 9) IEAYEDDLYRDESSSELSVDSEVEFQLYSQIHYAQDLDDVIREEEHEEKN 1
NP_001276048.1 ( 9) IEAYEDDLYRDESSSELSVDSEVEFQLYSQIHYAQDLDDVIREEEHEEKN 1
XP_047285073.1 ( 436) IWAALEQAESVNSDSDVPVDTPLTGNSVASSPCPNELDLPVPEGKTSEKQ 1
NP_060082.2 ( 527) IWAALEQAESVNSDSDVPVDTPLTGNSVASSPCPNELDLPVPEGKTSEKQ 1
NP_001337867.1 ( 289) IWAALEQAESVNSDSDVPVDTPLTGNSVASSPCPNELDLPVPEGKTSEKQ 1
NP_001337866.1 ( 289) IWAALEQAESVNSDSDVPVDTPLTGNSVASSPCPNELDLPVPEGKTSEKQ 1
NP_001337865.1 ( 428) IWAALEQAESVNSDSDVPVDTPLTGNSVASSPCPNELDLPVPEGKTSEKQ 1
NP_001337864.1 ( 450) IWAALEQAESVNSDSDVPVDTPLTGNSVASSPCPNELDLPVPEGKTSEKQ 1
//
--------------------------------------------------------------------------------
--------------------------------------------------------------------------------
	Motif IEAYEDDLYRDESSSELSVDSEVEFQLYSQIHYAQDLDDVIREEEHEEKN MEME-8 position-specific scoring matrix
--------------------------------------------------------------------------------
log-odds matrix: alength= 20 w= 50 n= 22786 bayes= 10.4569 E= 9.7e-511
-485 -561 -678 -750 -444 -597 -673 468 -749 -334 -356 -655 -689 -679 -701 -708 -492 -184 -571 -544
-517 -696 -443 300 -463 -556 -571 -655 -610 -628 -624 -563 -650 -494 -625 -660 -572 -624 496 -414
423 -449 -623 -673 -544 -395 -613 -540 -699 -565 -510 -563 -598 -594 -623 -421 -398 -417 -554 -585
272 -476 -618 -676 -171 -429 -402 -478 -673 -468 -455 -505 -593 -540 -588 -455 -407 -437 -269 456
-357 -648 -258 297 -409 -488 -501 -354 -445 224 -332 -443 -549 -311 -509 -533 -427 -388 -530 -484
-256 -688 340 214 -560 -387 -390 -456 -334 -468 -406 -269 -453 -193 -422 -413 -330 -395 -574 -487
-428 -648 350 -303 -587 -415 -452 -634 -493 -624 -598 -283 -580 297 -527 -474 -434 -588 -588 -527
268 -440 -658 -677 -269 -420 -591 -205 -689 315 -189 -559 -582 -542 -607 -443 -364 -259 -441 -446
-503 -607 -459 209 -157 -546 -383 -509 -593 -478 -479 -478 -638 -474 -570 -604 -522 -513 -255 457
-299 -508 -515 -544 -553 -416 -474 -558 -356 -554 -504 -421 -580 -404 331 166 -394 -483 -533 -513
-412 -558 351 -504 -511 -498 -583 -271 -653 -460 -470 -455 -644 -565 -644 -565 -465 289 -590 -547
-300 -626 -160 293 -546 -340 -365 -516 -368 -521 -468 289 -481 -251 -436 -380 -330 -458 -572 -465
-399 -571 -637 -746 -609 -500 -642 -669 -740 -665 -636 -567 -642 -655 -666 320 -372 -601 -595 -615
-317 -529 263 -408 -547 -334 -397 -607 -489 -610 -574 -205 -541 -415 -515 252 -352 -531 -567 -488
-399 -571 -637 -746 -609 -500 -642 -669 -740 -665 -636 -567 -642 -655 -666 320 -372 -601 -595 -615
-245 -750 253 295 -589 -395 -399 -455 -321 -463 -398 -309 -443 -176 -416 -417 -325 -388 -606 -505
-388 -462 -718 -701 -217 -635 -629 -70 -710 313 -129 -634 -666 -568 -649 -673 -394 284 -426 -424
-241 -459 -566 -659 -568 -385 -596 -596 -691 -609 -553 -491 236 -574 -623 255 -375 -469 -576 -588
-360 -492 -630 -673 -449 -556 -614 -159 -696 -370 -379 -611 -634 -632 -632 -634 -407 437 -570 -556
-384 -536 410 -253 -461 -434 -402 -458 -550 -502 -456 -192 -582 -453 -509 -490 -436 -448 -456 -440
-135 -284 -367 -451 -328 -302 -385 -335 -398 -376 -285 -201 -398 -359 -354 262 249 -334 -367 -339
-354 -696 -246 298 -622 -474 -503 -562 -445 -563 -513 -427 230 -307 -520 -521 -434 -498 -613 -574
-371 -445 -711 -706 -255 -633 -665 -51 -720 228 -167 -631 -680 -606 -680 -671 -378 370 -471 -451
-277 -618 -187 296 -578 -409 -444 -493 -383 -508 -450 -347 -493 -248 -458 -438 286 -427 -591 -523
-478 -620 -665 -775 451 262 -549 -616 -776 -585 -596 -617 -674 -661 -687 -629 -567 -598 -430 -299
-397 -591 -284 -420 -523 -366 -394 -608 -430 -596 -567 298 -562 383 -442 -418 -388 -570 -543 -457
-286 -477 -619 -678 -337 -433 -584 -298 -677 316 -274 -540 -596 -563 -609 165 -399 -343 -475 -448
-460 -520 -645 -687 -94 -571 -342 -257 -664 -349 -359 -509 -654 -529 -579 -602 -470 284 -197 455
276 -337 -571 -615 -499 -276 -565 -495 -658 -526 -443 -448 -482 -502 -564 251 -255 -347 -531 -548
-252 -469 -440 -518 -532 -374 -500 -575 -511 -581 -527 -375 -561 385 -495 167 -367 -468 -548 -514
-238 -423 -602 -656 -408 -403 -597 402 -667 -347 -348 -514 -580 -570 -612 164 -346 -177 -528 -478
-598 -692 -648 -772 -575 -576 436 -754 -765 -706 -734 -621 239 -677 -693 -716 -641 -721 -583 -537
-505 346 -658 -727 -140 -563 -381 -494 -705 -466 -473 -544 -664 -566 -611 -621 -541 -503 -239 458
360 -392 -599 -645 -533 -329 -592 -533 -683 -560 -490 -498 233 -541 -596 -348 -313 -398 -554 -575
-397 -591 -284 -420 -523 -366 -394 -608 -430 -596 -567 298 -562 383 -442 -418 -388 -570 -543 -457
-256 -688 340 214 -560 -387 -390 -456 -334 -468 -406 -269 -453 -193 -422 -413 -330 -395 -574 -487
-487 -559 -659 -670 -291 -582 -579 -240 -673 379 -192 -617 -624 -540 -589 -666 -486 -320 -451 -460
-384 -536 410 -253 -461 -434 -402 -458 -550 -502 -456 -192 -582 -453 -509 -490 -436 -448 -456 -440
-555 -664 353 -584 -484 -548 -605 -464 -702 232 -458 -510 -677 -612 -671 -659 -576 -514 -565 -541
-350 -505 -664 -723 -479 -497 -657 -221 -736 -409 -418 -614 234 -648 -677 -547 -435 376 -584 -556
-328 -410 -599 -619 -323 -579 -644 403 -620 -177 -196 -536 -642 -581 -622 -591 -324 283 -525 -446
-543 -673 -653 -694 -639 -561 -598 -697 -516 -665 -660 -603 238 -556 335 -673 -586 -663 -597 -613
-451 -631 -227 360 -550 -500 -497 -478 -625 -585 -524 -420 -678 -386 -585 -605 -498 -511 -541 -552
-357 -636 -281 298 -617 256 -505 -590 -480 -589 -543 -391 -560 -349 -541 -501 -434 -519 -608 -575
-268 -684 -152 293 -572 -408 -382 -453 180 -456 -394 -322 -463 -189 -302 -430 -333 -397 -551 -482
-420 -592 -536 -656 -472 -488 435 -633 -636 -621 -605 -468 -641 -551 -589 -550 298 -580 -517 -420
-253 -564 -185 295 -564 -375 -427 -501 -384 -510 -449 -304 -485 -252 -456 157 -340 -423 -581 -509
-451 -631 -227 360 -550 -500 -497 -478 -625 -585 -524 -420 -678 -386 -585 -605 -498 -511 -541 -552
-347 -471 -510 -504 -506 -466 -439 -381 338 -473 -395 -381 -523 -420 -117 -529 -378 -452 -414 -468
-388 -585 -260 -408 -519 -347 -380 -605 -428 -598 -572 384 -551 295 -445 -398 -371 -568 -544 -449
--------------------------------------------------------------------------------
--------------------------------------------------------------------------------
	Motif IEAYEDDLYRDESSSELSVDSEVEFQLYSQIHYAQDLDDVIREEEHEEKN MEME-8 position-specific probability matrix
--------------------------------------------------------------------------------
letter-probability matrix: alength= 20 w= 50 nsites= 17 E= 9.7e-511
0.000000 0.000000 0.000000 0.000000 0.000000 0.000000 0.000000 1.000000 0.000000 0.000000 0.000000 0.000000 0.000000 0.000000 0.000000 0.000000 0.000000 0.000000 0.000000 0.000000
0.000000 0.000000 0.000000 0.647059 0.000000 0.000000 0.000000 0.000000 0.000000 0.000000 0.000000 0.000000 0.000000 0.000000 0.000000 0.000000 0.000000 0.000000 0.352941 0.000000
1.000000 0.000000 0.000000 0.000000 0.000000 0.000000 0.000000 0.000000 0.000000 0.000000 0.000000 0.000000 0.000000 0.000000 0.000000 0.000000 0.000000 0.000000 0.000000 0.000000
0.352941 0.000000 0.000000 0.000000 0.000000 0.000000 0.000000 0.000000 0.000000 0.000000 0.000000 0.000000 0.000000 0.000000 0.000000 0.000000 0.000000 0.000000 0.000000 0.647059
0.000000 0.000000 0.000000 0.647059 0.000000 0.000000 0.000000 0.000000 0.000000 0.352941 0.000000 0.000000 0.000000 0.000000 0.000000 0.000000 0.000000 0.000000 0.000000 0.000000
0.000000 0.000000 0.647059 0.352941 0.000000 0.000000 0.000000 0.000000 0.000000 0.000000 0.000000 0.000000 0.000000 0.000000 0.000000 0.000000 0.000000 0.000000 0.000000 0.000000
0.000000 0.000000 0.647059 0.000000 0.000000 0.000000 0.000000 0.000000 0.000000 0.000000 0.000000 0.000000 0.000000 0.352941 0.000000 0.000000 0.000000 0.000000 0.000000 0.000000
0.352941 0.000000 0.000000 0.000000 0.000000 0.000000 0.000000 0.000000 0.000000 0.647059 0.000000 0.000000 0.000000 0.000000 0.000000 0.000000 0.000000 0.000000 0.000000 0.000000
0.000000 0.000000 0.000000 0.352941 0.000000 0.000000 0.000000 0.000000 0.000000 0.000000 0.000000 0.000000 0.000000 0.000000 0.000000 0.000000 0.000000 0.000000 0.000000 0.647059
0.000000 0.000000 0.000000 0.000000 0.000000 0.000000 0.000000 0.000000 0.000000 0.000000 0.000000 0.000000 0.000000 0.000000 0.647059 0.352941 0.000000 0.000000 0.000000 0.000000
0.000000 0.000000 0.647059 0.000000 0.000000 0.000000 0.000000 0.000000 0.000000 0.000000 0.000000 0.000000 0.000000 0.000000 0.000000 0.000000 0.000000 0.352941 0.000000 0.000000
0.000000 0.000000 0.000000 0.647059 0.000000 0.000000 0.000000 0.000000 0.000000 0.000000 0.000000 0.352941 0.000000 0.000000 0.000000 0.000000 0.000000 0.000000 0.000000 0.000000
0.000000 0.000000 0.000000 0.000000 0.000000 0.000000 0.000000 0.000000 0.000000 0.000000 0.000000 0.000000 0.000000 0.000000 0.000000 1.000000 0.000000 0.000000 0.000000 0.000000
0.000000 0.000000 0.352941 0.000000 0.000000 0.000000 0.000000 0.000000 0.000000 0.000000 0.000000 0.000000 0.000000 0.000000 0.000000 0.647059 0.000000 0.000000 0.000000 0.000000
0.000000 0.000000 0.000000 0.000000 0.000000 0.000000 0.000000 0.000000 0.000000 0.000000 0.000000 0.000000 0.000000 0.000000 0.000000 1.000000 0.000000 0.000000 0.000000 0.000000
0.000000 0.000000 0.352941 0.647059 0.000000 0.000000 0.000000 0.000000 0.000000 0.000000 0.000000 0.000000 0.000000 0.000000 0.000000 0.000000 0.000000 0.000000 0.000000 0.000000
0.000000 0.000000 0.000000 0.000000 0.000000 0.000000 0.000000 0.000000 0.000000 0.647059 0.000000 0.000000 0.000000 0.000000 0.000000 0.000000 0.000000 0.352941 0.000000 0.000000
0.000000 0.000000 0.000000 0.000000 0.000000 0.000000 0.000000 0.000000 0.000000 0.000000 0.000000 0.000000 0.352941 0.000000 0.000000 0.647059 0.000000 0.000000 0.000000 0.000000
0.000000 0.000000 0.000000 0.000000 0.000000 0.000000 0.000000 0.000000 0.000000 0.000000 0.000000 0.000000 0.000000 0.000000 0.000000 0.000000 0.000000 1.000000 0.000000 0.000000
0.000000 0.000000 1.000000 0.000000 0.000000 0.000000 0.000000 0.000000 0.000000 0.000000 0.000000 0.000000 0.000000 0.000000 0.000000 0.000000 0.000000 0.000000 0.000000 0.000000
0.000000 0.000000 0.000000 0.000000 0.000000 0.000000 0.000000 0.000000 0.000000 0.000000 0.000000 0.000000 0.000000 0.000000 0.000000 0.647059 0.352941 0.000000 0.000000 0.000000
0.000000 0.000000 0.000000 0.647059 0.000000 0.000000 0.000000 0.000000 0.000000 0.000000 0.000000 0.000000 0.352941 0.000000 0.000000 0.000000 0.000000 0.000000 0.000000 0.000000
0.000000 0.000000 0.000000 0.000000 0.000000 0.000000 0.000000 0.000000 0.000000 0.352941 0.000000 0.000000 0.000000 0.000000 0.000000 0.000000 0.000000 0.647059 0.000000 0.000000
0.000000 0.000000 0.000000 0.647059 0.000000 0.000000 0.000000 0.000000 0.000000 0.000000 0.000000 0.000000 0.000000 0.000000 0.000000 0.000000 0.352941 0.000000 0.000000 0.000000
0.000000 0.000000 0.000000 0.000000 0.647059 0.352941 0.000000 0.000000 0.000000 0.000000 0.000000 0.000000 0.000000 0.000000 0.000000 0.000000 0.000000 0.000000 0.000000 0.000000
0.000000 0.000000 0.000000 0.000000 0.000000 0.000000 0.000000 0.000000 0.000000 0.000000 0.000000 0.352941 0.000000 0.647059 0.000000 0.000000 0.000000 0.000000 0.000000 0.000000
0.000000 0.000000 0.000000 0.000000 0.000000 0.000000 0.000000 0.000000 0.000000 0.647059 0.000000 0.000000 0.000000 0.000000 0.000000 0.352941 0.000000 0.000000 0.000000 0.000000
0.000000 0.000000 0.000000 0.000000 0.000000 0.000000 0.000000 0.000000 0.000000 0.000000 0.000000 0.000000 0.000000 0.000000 0.000000 0.000000 0.000000 0.352941 0.000000 0.647059
0.352941 0.000000 0.000000 0.000000 0.000000 0.000000 0.000000 0.000000 0.000000 0.000000 0.000000 0.000000 0.000000 0.000000 0.000000 0.647059 0.000000 0.000000 0.000000 0.000000
0.000000 0.000000 0.000000 0.000000 0.000000 0.000000 0.000000 0.000000 0.000000 0.000000 0.000000 0.000000 0.000000 0.647059 0.000000 0.352941 0.000000 0.000000 0.000000 0.000000
0.000000 0.000000 0.000000 0.000000 0.000000 0.000000 0.000000 0.647059 0.000000 0.000000 0.000000 0.000000 0.000000 0.000000 0.000000 0.352941 0.000000 0.000000 0.000000 0.000000
0.000000 0.000000 0.000000 0.000000 0.000000 0.000000 0.647059 0.000000 0.000000 0.000000 0.000000 0.000000 0.352941 0.000000 0.000000 0.000000 0.000000 0.000000 0.000000 0.000000
0.000000 0.352941 0.000000 0.000000 0.000000 0.000000 0.000000 0.000000 0.000000 0.000000 0.000000 0.000000 0.000000 0.000000 0.000000 0.000000 0.000000 0.000000 0.000000 0.647059
0.647059 0.000000 0.000000 0.000000 0.000000 0.000000 0.000000 0.000000 0.000000 0.000000 0.000000 0.000000 0.352941 0.000000 0.000000 0.000000 0.000000 0.000000 0.000000 0.000000
0.000000 0.000000 0.000000 0.000000 0.000000 0.000000 0.000000 0.000000 0.000000 0.000000 0.000000 0.352941 0.000000 0.647059 0.000000 0.000000 0.000000 0.000000 0.000000 0.000000
0.000000 0.000000 0.647059 0.352941 0.000000 0.000000 0.000000 0.000000 0.000000 0.000000 0.000000 0.000000 0.000000 0.000000 0.000000 0.000000 0.000000 0.000000 0.000000 0.000000
0.000000 0.000000 0.000000 0.000000 0.000000 0.000000 0.000000 0.000000 0.000000 1.000000 0.000000 0.000000 0.000000 0.000000 0.000000 0.000000 0.000000 0.000000 0.000000 0.000000
0.000000 0.000000 1.000000 0.000000 0.000000 0.000000 0.000000 0.000000 0.000000 0.000000 0.000000 0.000000 0.000000 0.000000 0.000000 0.000000 0.000000 0.000000 0.000000 0.000000
0.000000 0.000000 0.647059 0.000000 0.000000 0.000000 0.000000 0.000000 0.000000 0.352941 0.000000 0.000000 0.000000 0.000000 0.000000 0.000000 0.000000 0.000000 0.000000 0.000000
0.000000 0.000000 0.000000 0.000000 0.000000 0.000000 0.000000 0.000000 0.000000 0.000000 0.000000 0.000000 0.352941 0.000000 0.000000 0.000000 0.000000 0.647059 0.000000 0.000000
0.000000 0.000000 0.000000 0.000000 0.000000 0.000000 0.000000 0.647059 0.000000 0.000000 0.000000 0.000000 0.000000 0.000000 0.000000 0.000000 0.000000 0.352941 0.000000 0.000000
0.000000 0.000000 0.000000 0.000000 0.000000 0.000000 0.000000 0.000000 0.000000 0.000000 0.000000 0.000000 0.352941 0.000000 0.647059 0.000000 0.000000 0.000000 0.000000 0.000000
0.000000 0.000000 0.000000 1.000000 0.000000 0.000000 0.000000 0.000000 0.000000 0.000000 0.000000 0.000000 0.000000 0.000000 0.000000 0.000000 0.000000 0.000000 0.000000 0.000000
0.000000 0.000000 0.000000 0.647059 0.000000 0.352941 0.000000 0.000000 0.000000 0.000000 0.000000 0.000000 0.000000 0.000000 0.000000 0.000000 0.000000 0.000000 0.000000 0.000000
0.000000 0.000000 0.000000 0.647059 0.000000 0.000000 0.000000 0.000000 0.352941 0.000000 0.000000 0.000000 0.000000 0.000000 0.000000 0.000000 0.000000 0.000000 0.000000 0.000000
0.000000 0.000000 0.000000 0.000000 0.000000 0.000000 0.647059 0.000000 0.000000 0.000000 0.000000 0.000000 0.000000 0.000000 0.000000 0.000000 0.352941 0.000000 0.000000 0.000000
0.000000 0.000000 0.000000 0.647059 0.000000 0.000000 0.000000 0.000000 0.000000 0.000000 0.000000 0.000000 0.000000 0.000000 0.000000 0.352941 0.000000 0.000000 0.000000 0.000000
0.000000 0.000000 0.000000 1.000000 0.000000 0.000000 0.000000 0.000000 0.000000 0.000000 0.000000 0.000000 0.000000 0.000000 0.000000 0.000000 0.000000 0.000000 0.000000 0.000000
0.000000 0.000000 0.000000 0.000000 0.000000 0.000000 0.000000 0.000000 1.000000 0.000000 0.000000 0.000000 0.000000 0.000000 0.000000 0.000000 0.000000 0.000000 0.000000 0.000000
0.000000 0.000000 0.000000 0.000000 0.000000 0.000000 0.000000 0.000000 0.000000 0.000000 0.000000 0.647059 0.000000 0.352941 0.000000 0.000000 0.000000 0.000000 0.000000 0.000000
--------------------------------------------------------------------------------
--------------------------------------------------------------------------------
	Motif IEAYEDDLYRDESSSELSVDSEVEFQLYSQIHYAQDLDDVIREEEHEEKN MEME-8 regular expression
--------------------------------------------------------------------------------
I[EW]A[YA][EL][DE][DQ][LA][YE][RS][DV][EN]S[SD]S[ED][LV][SP]VD[ST][EP][VL][ET][FG][QN][LS][YV][SA][QS][IS][HP][YC][AP][QN][DE]LD[DL][VP][IV][RP]E[EG][EK][HT][ES]EK[NQ]
--------------------------------------------------------------------------------
Time 112.75 secs.
********************************************************************************
********************************************************************************
MOTIF SRRGHLLYSCPAPLCEYCPVPKMLDHSCL MEME-9	width = 29 sites = 26 llr = 1691 E-value = 7.9e-446
********************************************************************************
--------------------------------------------------------------------------------
	Motif SRRGHLLYSCPAPLCEYCPVPKMLDHSCL MEME-9 Description
--------------------------------------------------------------------------------
Simplified A 2::::2:::::72::::::::::::::::
pos.-specific C :::::::::7::::a::9:::::::::9:
probability D :::2::::::::::::::::::::8::::
matrix E ::::::::2:1::::7:::2:::::::::
F ::1::1::13:2:::211::1::::::::
G :::7:::2::::::::::2::2:::::::
H ::::7:::::::::::::::::2::7:::
I :1::1::::::::1::::::::::::::1
K :2:::::::::::2:::::::7:::::::
L :::::78::::::7:::::::::a::::7
M ::::::::::::::::::::2:8::::::
N :::::::::::::::::::::::::::::
P 1:::2:1:::8:7:::::8:7:::::::2
Q :::::::::::::::1:::::1::::1::
R :77:::::::::1::::::::::::2:::
S 7:::::::7::1:::::::2::::2:9::
T :::::::::::::::::::::::::::::
[truncated: 1,805 more rows]

## Sheet: Location
Table S4. Chromosomal location and MOTIF structure of the ZCCHC gene family and its correlation and expression with THCA
tax_id	Org_name	GeneID	CurrentID	Status	Symbol	Aliases	description	other_designations	map_location	chromosome	genomic_nucleotide_accession.version	start_position_on_the_genomic_accession	end_position_on_the_genomic_accession	orientation	exon_count	OMIM
9606	Homo sapiens	54819	0	live	ZCCHC10		zinc finger CCHC-type containing 10	zinc finger CCHC domain-containing protein 10|zinc finger, CCHC domain containing 10	5q31.1	5	NC_000005.10	132996985	133026549	minus	6
9606	Homo sapiens	170261	0	live	ZCCHC12	PNMA7A, SIZN, SIZN1	zinc finger CCHC-type containing 12	zinc finger CCHC domain-containing protein 12|paraneoplastic Ma antigen family member 7A|smad-interacting zinc finger protein 1|zinc finger, CCHC domain containing 12	Xq24	X	NC_000023.11	118823824	118826968	plus	4	300701
9606	Homo sapiens	23174	0	live	ZCCHC14	BDG-29, BDG29	zinc finger CCHC-type containing 14	zinc finger CCHC domain-containing protein 14|zinc finger, CCHC domain containing 14	16q24.2	16	NC_000016.10	87406248	87493024	minus	14
9606	Homo sapiens	51538	0	live	ZCCHC17	HSPC251, PS1D, pNO40	zinc finger CCHC-type containing 17	zinc finger CCHC domain-containing protein 17|nucleolar protein of 40 kDa|nucleolar protein 40|pnn-interacting nucleolar protein|putative S1 RNA binding domain protein|zinc finger, CCHC domain containing 17	1p35.2	1	NC_000001.11	31297032	31364936	plus	9	619744
9606	Homo sapiens	644353	0	live	ZCCHC18	PNMA7B, SIZN2	zinc finger CCHC-type containing 18	zinc finger CCHC domain-containing protein 18|paraneoplastic Ma antigen family member 7B|putative zinc finger CCHC domain-containing protein 18|zinc finger, CCHC domain containing 12 pseudogene 1	Xq22.2	X	NC_000023.11	104112523	104115842	plus	3
9606	Homo sapiens	54877	0	live	ZCCHC2	C18orf49	zinc finger CCHC-type containing 2	zinc finger CCHC domain-containing protein 2|zinc finger, CCHC domain containing 2	18q21.33	18	NC_000018.10	62523025	62586729	plus	15
9606	Homo sapiens	219654	0	live	ZCCHC24	C10orf56, Z3CXXC8	zinc finger CCHC-type containing 24	zinc finger CCHC domain-containing protein 24|zinc finger, 3CxxC-type 8|zinc finger, CCHC domain containing 24	10q22.3	10	NC_000010.11	79382325	79445624	minus	5
9606	Homo sapiens	85364	0	live	ZCCHC3	C20orf99	zinc finger CCHC-type containing 3	zinc finger CCHC domain-containing protein 3|zinc finger, CCHC domain containing 3	20p13	20	NC_000020.11	297570	300321	plus	1	618326
9606	Homo sapiens	29063	0	live	ZCCHC4	HSPC052, ZGRF4	zinc finger CCHC-type containing 4	rRNA N6-adenosine-methyltransferase ZCCHC4|DHHC domain-containing zinc finger protein|zinc finger CCHC domain-containing protein 4|zinc finger, CCHC domain containing 4|zinc finger, GRF-type containing 4	4p15.2	4	NC_000004.12	25312774	25370383	plus	15	611792
9606	Homo sapiens	84186	0	live	ZCCHC7	AIR1, HSPC086	zinc finger CCHC-type containing 7	zinc finger CCHC domain-containing protein 7|TRAMP-like complex RNA-binding factor ZCCHC7|zinc finger, CCHC domain containing 7	9p13.2	9	NC_000009.12	37120167	37358149	plus	13
9606	Homo sapiens	55596	0	live	ZCCHC8	PFBMFT5	zinc finger CCHC-type containing 8	zinc finger CCHC domain-containing protein 8|TRAMP-like complex RNA-binding factor ZCCHC8|zinc finger, CCHC domain containing 8	12q24.31	12	NC_000012.12	122471600	122500932	minus	16	616381
9606	Homo sapiens	84240	0	live	ZCCHC9	PPP1R41	zinc finger CCHC-type containing 9	zinc finger CCHC domain-containing protein 9|protein phosphatase 1, regulatory subunit 41|zinc finger, CCHC domain containing 9	5q14.1	5	NC_000005.10	81301587	81313297	plus	7

## Sheet: Relevance
Table S5. Chromosomal location and MOTIF structure of the ZCCHC gene family and its correlation and expression with THCA
Genes	Gene1	Gene2	cor	p.value	pstar
cor.result.rho	ZCCHC2	TP53	0.538452	7.87795e-40	**
cor.result.rho1	ZCCHC2	BRCA1	0.451289	4.67896e-27	**
cor.result.rho2	ZCCHC2	BRCA2	0.456428	1.03448e-27	**
cor.result.rho3	ZCCHC2	RET	0.147867	0.000790399	**
cor.result.rho4	ZCCHC2	PTEN	0.699238	2.31339e-76	**
cor.result.rho5	ZCCHC2	BRAF	0.804409	2.00163e-117	**
cor.result.rho6	ZCCHC2	CDH1	0.649919	8.91133e-63	**
cor.result.rho7	ZCCHC2	CHEK2	0.138913	0.00162802	**
cor.result.rho8	ZCCHC2	KRAS	0.713999	5.49457e-81	**
cor.result.rho9	ZCCHC2	PIK3CA	0.79018	1.61926e-110	**
cor.result.rho10	ZCCHC2	EGFR	0.718863	1.4159e-82	**
cor.result.rho11	ZCCHC2	MSH2	0.76612	5.57731e-100	**
cor.result.rho12	ZCCHC2	MLH1	0.662153	6.61641e-66	**
cor.result.rho13	ZCCHC2	THRB	0.42136	1.8758e-23	**
cor.result.rho14	ZCCHC2	PALB2	0.710872	5.54304e-80	**
cor.result.rho15	ZCCHC2	ATM	0.783869	1.26998e-107	**
cor.result.rho16	ZCCHC2	MSH6	0.8355	1.01191e-134	**
cor.result.rho17	ZCCHC2	TG	0.339014	3.09473e-15	**
cor.result.rho18	ZCCHC2	APC	0.761379	4.721e-98	**
cor.result.rho19	ZCCHC2	HRAS	-0.0174298	0.693982
cor.result.rho20	ZCCHC2	NKX2-1	0.193861	9.96945e-06	**
cor.result.rho21	ZCCHC2	TSHR	0.557682	3.50039e-43	**
cor.result.rho22	ZCCHC2	TPO	0.0644326	0.145422
cor.result.rho23	ZCCHC2	BRIP1	0.276624	1.90665e-10	**
cor.result.rho24	ZCCHC2	AKT1	0.702953	1.68702e-77	**
cor.result.rho25	ZCCHC3	TP53	0.47648	0	**
cor.result.rho110	ZCCHC3	BRCA1	0.285572	4.59312e-11	**
cor.result.rho26	ZCCHC3	BRCA2	0.0130072	0.769053
cor.result.rho31	ZCCHC3	RET	0.0886403	0.0449903	*
cor.result.rho41	ZCCHC3	PTEN	0.572641	0	**
cor.result.rho51	ZCCHC3	BRAF	0.55128	4.83391e-42	**
cor.result.rho61	ZCCHC3	CDH1	0.395453	0	**
cor.result.rho71	ZCCHC3	CHEK2	-0.0357556	0.419472
cor.result.rho81	ZCCHC3	KRAS	0.417537	0	**
cor.result.rho91	ZCCHC3	PIK3CA	0.246483	1.59451e-08	**
cor.result.rho101	ZCCHC3	EGFR	0.355207	1.10808e-16	**
cor.result.rho111	ZCCHC3	MSH2	0.539364	0	**
cor.result.rho121	ZCCHC3	MLH1	0.59854	0	**
cor.result.rho131	ZCCHC3	THRB	-0.0258717	0.559169
cor.result.rho141	ZCCHC3	PALB2	0.363731	1.84495e-17	**
cor.result.rho151	ZCCHC3	ATM	0.402204	0	**
cor.result.rho161	ZCCHC3	MSH6	0.491286	1.83143e-32	**
cor.result.rho171	ZCCHC3	TG	0.526687	0	**
cor.result.rho181	ZCCHC3	APC	0.426548	0	**
cor.result.rho191	ZCCHC3	HRAS	0.453762	0	**
cor.result.rho201	ZCCHC3	NKX2-1	0.660296	0	**
cor.result.rho211	ZCCHC3	TSHR	0.614673	0	**
cor.result.rho221	ZCCHC3	TPO	0.229396	1.66655e-07	**
cor.result.rho231	ZCCHC3	BRIP1	-0.00689058	0.876398
cor.result.rho241	ZCCHC3	AKT1	0.597518	0	**
cor.result.rho27	ZCCHC4	TP53	0.490861	2.1093e-32	**
cor.result.rho112	ZCCHC4	BRCA1	0.471142	1.18938e-29	**
cor.result.rho28	ZCCHC4	BRCA2	0.330982	1.48598e-14	**
cor.result.rho32	ZCCHC4	RET	0.140833	0.00139916	**
cor.result.rho42	ZCCHC4	PTEN	0.725089	1.16892e-84	**
cor.result.rho52	ZCCHC4	BRAF	0.772681	1.00573e-102	**
cor.result.rho62	ZCCHC4	CDH1	0.54577	4.42746e-41	**
cor.result.rho72	ZCCHC4	CHEK2	0.129851	0.00324553	**
cor.result.rho82	ZCCHC4	KRAS	0.623319	1.89733e-56	**
cor.result.rho92	ZCCHC4	PIK3CA	0.616029	8.08399e-55	**
cor.result.rho102	ZCCHC4	EGFR	0.591657	1.14139e-49	**
cor.result.rho113	ZCCHC4	MSH2	0.738197	3.07512e-89	**
cor.result.rho122	ZCCHC4	MLH1	0.750993	5.53665e-94	**
cor.result.rho132	ZCCHC4	THRB	0.290472	2.06147e-11	**
cor.result.rho142	ZCCHC4	PALB2	0.719927	6.29461e-83	**
cor.result.rho152	ZCCHC4	ATM	0.703971	8.17782e-78	**
cor.result.rho162	ZCCHC4	MSH6	0.733632	1.2994e-87	**
cor.result.rho172	ZCCHC4	TG	0.486082	1.01702e-31	**
cor.result.rho182	ZCCHC4	APC	0.697317	8.81354e-76	**
cor.result.rho192	ZCCHC4	HRAS	0.0490674	0.267766
cor.result.rho202	ZCCHC4	NKX2-1	0.352597	1.96062e-16	**
cor.result.rho212	ZCCHC4	TSHR	0.636323	1.8287e-59	**
cor.result.rho222	ZCCHC4	TPO	0.169413	0.000117212	**
cor.result.rho232	ZCCHC4	BRIP1	0.193836	9.99671e-06	**
cor.result.rho242	ZCCHC4	AKT1	0.666383	5.05744e-67	**
cor.result.rho29	ZCCHC7	TP53	0.615274	0	**
cor.result.rho114	ZCCHC7	BRCA1	0.404198	1.52186e-21	**
cor.result.rho210	ZCCHC7	BRCA2	0.238931	4.43414e-08	**
cor.result.rho33	ZCCHC7	RET	0.109728	0.0129804	*
cor.result.rho43	ZCCHC7	PTEN	0.72044	0	**
cor.result.rho53	ZCCHC7	BRAF	0.74076	3.63081e-90	**
cor.result.rho63	ZCCHC7	CDH1	0.642986	0	**
cor.result.rho73	ZCCHC7	CHEK2	0.147573	0.000809895	**
cor.result.rho83	ZCCHC7	KRAS	0.603431	0	**
cor.result.rho93	ZCCHC7	PIK3CA	0.540578	3.43843e-40	**
cor.result.rho103	ZCCHC7	EGFR	0.620438	0	**
cor.result.rho115	ZCCHC7	MSH2	0.688669	0	**
cor.result.rho123	ZCCHC7	MLH1	0.698275	0	**
cor.result.rho133	ZCCHC7	THRB	0.184481	2.66637e-05	**
cor.result.rho143	ZCCHC7	PALB2	0.624151	1.2286e-56	**
cor.result.rho153	ZCCHC7	ATM	0.654089	0	**
cor.result.rho163	ZCCHC7	MSH6	0.687229	8.35918e-73	**
cor.result.rho173	ZCCHC7	TG	0.446284	0	**
cor.result.rho183	ZCCHC7	APC	0.620549	0	**
cor.result.rho193	ZCCHC7	HRAS	0.206131	2.69324e-06	**
cor.result.rho203	ZCCHC7	NKX2-1	0.469925	0	**
cor.result.rho213	ZCCHC7	TSHR	0.637153	0	**
cor.result.rho223	ZCCHC7	TPO	0.171163	0.000101607	**
cor.result.rho233	ZCCHC7	BRIP1	0.125164	0.00456286	**
cor.result.rho243	ZCCHC7	AKT1	0.565582	0	**
cor.result.rho30	ZCCHC8	TP53	0.517451	2.08517e-36	**
cor.result.rho116	ZCCHC8	BRCA1	0.394696	1.55861e-20	**
cor.result.rho214	ZCCHC8	BRCA2	0.258482	2.92693e-09	**
cor.result.rho34	ZCCHC8	RET	0.120926	0.00615107	**
cor.result.rho44	ZCCHC8	PTEN	0.654587	5.92983e-64	**
cor.result.rho54	ZCCHC8	BRAF	0.750065	1.25049e-93	**
cor.result.rho64	ZCCHC8	CDH1	0.538801	6.87789e-40	**
cor.result.rho74	ZCCHC8	CHEK2	0.127847	0.00375935	**
cor.result.rho84	ZCCHC8	KRAS	0.581992	9.5627e-48	**
cor.result.rho94	ZCCHC8	PIK3CA	0.552014	3.58873e-42	**
cor.result.rho104	ZCCHC8	EGFR	0.594885	2.51437e-50	**
cor.result.rho117	ZCCHC8	MSH2	0.736458	1.29202e-88	**
cor.result.rho124	ZCCHC8	MLH1	0.675264	1.99041e-69	**
cor.result.rho134	ZCCHC8	THRB	0.150591	0.000629277	**
cor.result.rho144	ZCCHC8	PALB2	0.646305	7.02768e-62	**
cor.result.rho154	ZCCHC8	ATM	0.679197	1.60906e-70	**
cor.result.rho164	ZCCHC8	MSH6	0.677967	3.54837e-70	**
cor.result.rho174	ZCCHC8	TG	0.440534	1.01467e-25	**
cor.result.rho184	ZCCHC8	APC	0.600547	1.69889e-51	**
cor.result.rho194	ZCCHC8	HRAS	0.216957	7.18377e-07	**
cor.result.rho204	ZCCHC8	NKX2-1	0.539211	5.8636e-40	**
cor.result.rho215	ZCCHC8	TSHR	0.652379	2.14916e-63	**
cor.result.rho224	ZCCHC8	TPO	0.0955059	0.0307176	*
cor.result.rho234	ZCCHC8	BRIP1	0.157457	0.00034825	**
cor.result.rho244	ZCCHC8	AKT1	0.64692	4.9541e-62	**
cor.result.rho35	ZCCHC9	TP53	0.472609	7.528e-30	**
cor.result.rho118	ZCCHC9	BRCA1	0.172078	9.10087e-05	**
cor.result.rho216	ZCCHC9	BRCA2	0.179133	4.57335e-05	**
cor.result.rho36	ZCCHC9	RET	0.358604	5.54114e-17	**
cor.result.rho45	ZCCHC9	PTEN	0.482871	2.88688e-31	**
cor.result.rho55	ZCCHC9	BRAF	0.46984	1.78101e-29	**
cor.result.rho65	ZCCHC9	CDH1	0.468987	2.31836e-29	**
cor.result.rho75	ZCCHC9	CHEK2	0.269474	5.73245e-10	**
cor.result.rho85	ZCCHC9	KRAS	0.470789	1.32696e-29	**
cor.result.rho95	ZCCHC9	PIK3CA	0.366803	9.4541e-18	**
cor.result.rho105	ZCCHC9	EGFR	0.492938	1.0564e-32	**
cor.result.rho119	ZCCHC9	MSH2	0.5832	5.54134e-48	**
cor.result.rho125	ZCCHC9	MLH1	0.493319	9.29951e-33	**
cor.result.rho135	ZCCHC9	THRB	0.0351174	0.427826
cor.result.rho145	ZCCHC9	PALB2	0.406062	9.55563e-22	**
cor.result.rho155	ZCCHC9	ATM	0.522127	3.78129e-37	**
cor.result.rho165	ZCCHC9	MSH6	0.485989	1.04852e-31	**
cor.result.rho175	ZCCHC9	TG	0.246453	1.60111e-08	**
cor.result.rho185	ZCCHC9	APC	0.336806	4.78539e-15	**
cor.result.rho195	ZCCHC9	HRAS	0.359792	4.30261e-17	**
cor.result.rho205	ZCCHC9	NKX2-1	0.603097	4.95901e-52	**
cor.result.rho217	ZCCHC9	TSHR	0.472688	7.34365e-30	**
cor.result.rho225	ZCCHC9	TPO	0.00338018	0.939182
cor.result.rho235	ZCCHC9	BRIP1	0.0918302	0.0377839	*
cor.result.rho245	ZCCHC9	AKT1	0.461262	2.44302e-28	**
cor.result.rho37	ZCCHC10	TP53	0.586542	1.21105e-48	**
cor.result.rho120	ZCCHC10	BRCA1	0.447429	1.42955e-26	**
cor.result.rho218	ZCCHC10	BRCA2	0.329782	1.87122e-14	**
cor.result.rho38	ZCCHC10	RET	0.151336	0.000590825	**
cor.result.rho46	ZCCHC10	PTEN	0.754295	2.96127e-95	**
cor.result.rho56	ZCCHC10	BRAF	0.717893	2.95616e-82	**
cor.result.rho66	ZCCHC10	CDH1	0.578924	3.78113e-47	**
cor.result.rho76	ZCCHC10	CHEK2	0.201873	4.1408e-06	**
cor.result.rho86	ZCCHC10	KRAS	0.702819	1.85621e-77	**
cor.result.rho96	ZCCHC10	PIK3CA	0.578485	4.59804e-47	**
cor.result.rho106	ZCCHC10	EGFR	0.576826	9.60289e-47	**
cor.result.rho1110	ZCCHC10	MSH2	0.688261	4.19753e-73	**
cor.result.rho126	ZCCHC10	MLH1	0.738942	1.65693e-89	**
cor.result.rho136	ZCCHC10	THRB	0.217714	6.55707e-07	**
cor.result.rho146	ZCCHC10	PALB2	0.588243	5.54744e-49	**
cor.result.rho156	ZCCHC10	ATM	0.661818	8.09838e-66	**
cor.result.rho166	ZCCHC10	MSH6	0.71315	1.03228e-80	**
cor.result.rho176	ZCCHC10	TG	0.437702	2.24037e-25	**
cor.result.rho186	ZCCHC10	APC	0.666073	6.1158e-67	**
cor.result.rho196	ZCCHC10	HRAS	0.204385	3.12089e-06	**
cor.result.rho206	ZCCHC10	NKX2-1	0.373977	1.92896e-18	**
cor.result.rho219	ZCCHC10	TSHR	0.590133	2.3164e-49	**
cor.result.rho226	ZCCHC10	TPO	0.224976	2.68565e-07	**
cor.result.rho236	ZCCHC10	BRIP1	0.246726	1.5422e-08	**
cor.result.rho246	ZCCHC10	AKT1	0.602683	6.05952e-52	**
cor.result.rho39	ZCCHC12	TP53	0.196313	7.97259e-06	**
cor.result.rho127	ZCCHC12	BRCA1	0.138331	0.00170388	**
cor.result.rho220	ZCCHC12	BRCA2	0.129892	0.00323554	**
cor.result.rho310	ZCCHC12	RET	0.199937	5.13688e-06	**
cor.result.rho47	ZCCHC12	PTEN	0.190225	1.52241e-05	**
cor.result.rho57	ZCCHC12	BRAF	0.214064	1.01525e-06	**
cor.result.rho67	ZCCHC12	CDH1	0.170033	0.000113024	**
cor.result.rho77	ZCCHC12	CHEK2	0.196654	7.3691e-06	**
cor.result.rho87	ZCCHC12	KRAS	0.177608	5.46348e-05	**
cor.result.rho97	ZCCHC12	PIK3CA	0.285051	4.99766e-11	**
cor.result.rho107	ZCCHC12	EGFR	0.362545	1.30494e-17	**
cor.result.rho1111	ZCCHC12	MSH2	0.367186	8.89305e-19	**
cor.result.rho128	ZCCHC12	MLH1	0.153634	0.000492457	**
cor.result.rho137	ZCCHC12	THRB	-0.00412937	0.925738
cor.result.rho147	ZCCHC12	PALB2	0.207992	2.06636e-06	**
cor.result.rho157	ZCCHC12	ATM	0.300513	4.85634e-12	**
cor.result.rho167	ZCCHC12	MSH6	0.266846	8.52276e-10	**
cor.result.rho177	ZCCHC12	TG	0.0155823	0.72494
cor.result.rho187	ZCCHC12	APC	0.0951512	0.0313792	*
cor.result.rho197	ZCCHC12	HRAS	0.259651	2.83133e-09	**
cor.result.rho207	ZCCHC12	NKX2-1	0.499096	0	**
cor.result.rho2110	ZCCHC12	TSHR	0.31206	6.60487e-13	**
cor.result.rho227	ZCCHC12	TPO	-0.20995	1.74091e-06	**
cor.result.rho237	ZCCHC12	BRIP1	0.0688696	0.119618
cor.result.rho247	ZCCHC12	AKT1	0.312884	5.70819e-13	**
cor.result.rho40	ZCCHC14	TP53	0.509998	0	**
cor.result.rho129	ZCCHC14	BRCA1	0.36031	3.85143e-17	**
cor.result.rho228	ZCCHC14	BRCA2	0.474642	3.98018e-30	**
cor.result.rho311	ZCCHC14	RET	0.217198	6.97824e-07	**
cor.result.rho48	ZCCHC14	PTEN	0.612863	0	**
cor.result.rho58	ZCCHC14	BRAF	0.701386	5.11765e-77	**
cor.result.rho68	ZCCHC14	CDH1	0.623457	0	**
cor.result.rho78	ZCCHC14	CHEK2	0.26216	1.71027e-09	**
cor.result.rho88	ZCCHC14	KRAS	0.626473	0	**
cor.result.rho98	ZCCHC14	PIK3CA	0.799035	9.45352e-115	**
cor.result.rho108	ZCCHC14	EGFR	0.764531	0	**
cor.result.rho1112	ZCCHC14	MSH2	0.739444	0	**
cor.result.rho1210	ZCCHC14	MLH1	0.511192	0	**
cor.result.rho138	ZCCHC14	THRB	0.45124	4.74622e-27	**
cor.result.rho148	ZCCHC14	PALB2	0.688885	2.76597e-73	**
cor.result.rho158	ZCCHC14	ATM	0.684994	0	**
cor.result.rho168	ZCCHC14	MSH6	0.731815	5.64197e-87	**
cor.result.rho178	ZCCHC14	TG	0.161743	0.000242007	**
cor.result.rho188	ZCCHC14	APC	0.648207	0	**
cor.result.rho198	ZCCHC14	HRAS	-0.0449054	0.310414
cor.result.rho208	ZCCHC14	NKX2-1	0.205265	2.96983e-06	**
cor.result.rho2111	ZCCHC14	TSHR	0.482922	0	**
cor.result.rho229	ZCCHC14	TPO	-0.122016	0.00572774	**
cor.result.rho238	ZCCHC14	BRIP1	0.308867	8.85256e-13	**
cor.result.rho248	ZCCHC14	AKT1	0.64109	0	**
cor.result.rho49	ZCCHC17	TP53	0.389169	0	**
cor.result.rho130	ZCCHC17	BRCA1	0.143952	0.00108948	**
cor.result.rho230	ZCCHC17	BRCA2	-0.111476	0.0115989	*
cor.result.rho312	ZCCHC17	RET	0.0819227	0.0639853
cor.result.rho410	ZCCHC17	PTEN	0.401208	0	**
cor.result.rho59	ZCCHC17	BRAF	0.375788	1.28329e-18	**
cor.result.rho69	ZCCHC17	CDH1	0.400799	0	**
cor.result.rho79	ZCCHC17	CHEK2	0.124368	0.00482925	**
cor.result.rho89	ZCCHC17	KRAS	0.263675	1.58197e-09	**
cor.result.rho99	ZCCHC17	PIK3CA	0.0835748	0.0587892
cor.result.rho109	ZCCHC17	EGFR	0.256682	4.32318e-09	**
cor.result.rho1113	ZCCHC17	MSH2	0.415515	0	**
cor.result.rho1211	ZCCHC17	MLH1	0.533477	0	**
cor.result.rho139	ZCCHC17	THRB	-0.0173843	0.694741
cor.result.rho149	ZCCHC17	PALB2	0.24401	2.23733e-08	**
cor.result.rho159	ZCCHC17	ATM	0.207859	2.2128e-06	**
cor.result.rho169	ZCCHC17	MSH6	0.331445	1.35925e-14	**
cor.result.rho179	ZCCHC17	TG	0.434611	0	**
cor.result.rho189	ZCCHC17	APC	0.201241	4.65408e-06	**
cor.result.rho199	ZCCHC17	HRAS	0.563822	0	**
cor.result.rho209	ZCCHC17	NKX2-1	0.570749	0	**
cor.result.rho2112	ZCCHC17	TSHR	0.509751	0	**
cor.result.rho2210	ZCCHC17	TPO	0.201339	4.60415e-06	**
cor.result.rho239	ZCCHC17	BRIP1	-0.0995118	0.024336	*
cor.result.rho249	ZCCHC17	AKT1	0.386069	0	**
cor.result.rho50	ZCCHC18	TP53	0.22788	1.86355e-07	**
cor.result.rho140	ZCCHC18	BRCA1	0.0919016	0.0376345	*
cor.result.rho240	ZCCHC18	BRCA2	0.276317	2.00019e-10	**
cor.result.rho313	ZCCHC18	RET	0.345452	8.5113e-16	**
cor.result.rho411	ZCCHC18	PTEN	0.070848	0.109333
cor.result.rho510	ZCCHC18	BRAF	-0.0280253	0.526921
cor.result.rho610	ZCCHC18	CDH1	0.0216379	0.625216
cor.result.rho710	ZCCHC18	CHEK2	0.16474	0.000181013	**
cor.result.rho810	ZCCHC18	KRAS	0.198911	5.75388e-06	**
cor.result.rho910	ZCCHC18	PIK3CA	0.0966664	0.0287361	*
cor.result.rho1010	ZCCHC18	EGFR	0.104675	0.017824	*
cor.result.rho1114	ZCCHC18	MSH2	0.0474619	0.283756
cor.result.rho1212	ZCCHC18	MLH1	0.044769	0.311998
cor.result.rho1310	ZCCHC18	THRB	-0.108954	0.0136379	*
cor.result.rho1410	ZCCHC18	PALB2	0.0618227	0.162472
cor.result.rho1510	ZCCHC18	ATM	0.355747	1.01407e-16	**
cor.result.rho1610	ZCCHC18	MSH6	0.13613	0.00202103	**
cor.result.rho1710	ZCCHC18	TG	-0.0832724	0.0597133
cor.result.rho1810	ZCCHC18	APC	0.0811941	0.0663941
cor.result.rho1910	ZCCHC18	HRAS	0.105851	0.0165749	*
cor.result.rho2010	ZCCHC18	NKX2-1	0.162192	0.000228305	**
cor.result.rho2113	ZCCHC18	TSHR	0.0341399	0.440805
cor.result.rho2211	ZCCHC18	TPO	0.0126204	0.775735
cor.result.rho2310	ZCCHC18	BRIP1	0.244179	2.18623e-08	**
cor.result.rho2410	ZCCHC18	AKT1	0.103476	0.0191825	*
cor.result.rho60	ZCCHC24	TP53	0.505057	0	**
cor.result.rho150	ZCCHC24	BRCA1	0.331383	1.37564e-14	**
cor.result.rho250	ZCCHC24	BRCA2	0.44751	1.39634e-26	**
cor.result.rho314	ZCCHC24	RET	0.219	5.61025e-07	**
cor.result.rho412	ZCCHC24	PTEN	0.611352	0	**
cor.result.rho511	ZCCHC24	BRAF	0.564657	1.87619e-44	**
cor.result.rho611	ZCCHC24	CDH1	0.545854	0	**
cor.result.rho711	ZCCHC24	CHEK2	0.182914	3.12818e-05	**
cor.result.rho811	ZCCHC24	KRAS	0.603833	0	**
cor.result.rho911	ZCCHC24	PIK3CA	0.714528	3.70326e-81	**
cor.result.rho1011	ZCCHC24	EGFR	0.627649	0	**
cor.result.rho1115	ZCCHC24	MSH2	0.611687	0	**
cor.result.rho1213	ZCCHC24	MLH1	0.49575	0	**
cor.result.rho1311	ZCCHC24	THRB	0.35084	2.8229e-16	**
cor.result.rho1411	ZCCHC24	PALB2	0.544147	8.43768e-41	**
cor.result.rho1511	ZCCHC24	ATM	0.656979	0	**
cor.result.rho1611	ZCCHC24	MSH6	0.693383	1.32024e-74	**
cor.result.rho1711	ZCCHC24	TG	0.238032	5.49335e-08	**
cor.result.rho1811	ZCCHC24	APC	0.636787	0	**
cor.result.rho1911	ZCCHC24	HRAS	-0.074169	0.0936414
cor.result.rho2011	ZCCHC24	NKX2-1	0.0972012	0.0278946	*
cor.result.rho2114	ZCCHC24	TSHR	0.451082	0	**
cor.result.rho2212	ZCCHC24	TPO	0.0517154	0.242673
cor.result.rho2311	ZCCHC24	BRIP1	0.249395	1.0652e-08	**
cor.result.rho2411	ZCCHC24	AKT1	0.612223	0	**
