# Supplementary material for: Differential expression of zinc finger CCHC-type superfamily proteins in thyroid carcinoma and their associations with tumor immunity
Source: Thyroid Res. 2023 Oct 17;16:42. doi: 10.1186/s13044-023-00185-1 (PMC10580525; doi:10.1186/s13044-023-00185-1)
Supplement: Supplementary file 5 — Supplementary Material 5: Table S5. Chromosomal location and MOTIF structure of the ZCCHC gene family and its correlation and expression with THCA [file 13044_2023_185_MOESM5_ESM.xlsx]

## Sheet: ZCCHC2
Table S6. Association of the ZCCHC gene family with THCA survival and staging
rownames(datas)	Type	values	times	status
TCGA-IM-A420-01	G1(n=288)	2.53901	NA	NA
TCGA-EM-A3FO-01	G1(n=288)	2.89722	NA	NA
TCGA-EL-A3H7-01	G1(n=288)	2.52975	NA	NA
TCGA-BJ-A0ZC-01	G1(n=288)	3.21034	NA	NA
TCGA-EM-A4FO-01	G1(n=288)	2.43226	NA	NA
TCGA-DJ-A2PO-01	G1(n=288)	3.21215	NA	NA
TCGA-EL-A3ZT-01	G1(n=288)	2.88871	NA	NA
TCGA-DJ-A13O-01	G1(n=288)	2.26837	NA	NA
TCGA-EM-A1CW-01	G1(n=288)	2.4413	NA	NA
TCGA-E3-A3E2-01	G1(n=288)	2.70255	NA	NA
TCGA-E8-A416-01	G1(n=288)	3.11352	NA	NA
TCGA-ET-A2N3-01	G1(n=288)	2.77876	NA	NA
TCGA-DJ-A4V0-01	G1(n=288)	3.11485	NA	NA
TCGA-EL-A3T6-01	G1(n=288)	2.90367	NA	NA
TCGA-ET-A3BO-01	G1(n=288)	3.13346	NA	NA
TCGA-CE-A481-01	G1(n=288)	3.11338	NA	NA
TCGA-E8-A419-01	G1(n=288)	2.71099	NA	NA
TCGA-E8-A438-01	G1(n=288)	2.29892	NA	NA
TCGA-E3-A3E0-01	G1(n=288)	2.83309	NA	NA
TCGA-ET-A3DS-01	G1(n=288)	3.12955	NA	NA
TCGA-DJ-A4UL-01	G1(n=288)	2.55321	NA	NA
TCGA-EM-A2CK-01	G1(n=288)	2.83582	NA	NA
TCGA-J8-A3O1-01	G1(n=288)	3.69031	NA	NA
TCGA-FE-A237-01	G1(n=288)	3.20459	NA	NA
TCGA-EM-A3O8-01	G1(n=288)	3.13591	NA	NA
TCGA-H2-A2K9-01	G1(n=288)	3.39929	NA	NA
TCGA-DJ-A1QM-01	G1(n=288)	3.07907	NA	NA
TCGA-H2-A3RH-01	G1(n=288)	3.3107	NA	NA
TCGA-IM-A41Z-01	G1(n=288)	3.01039	NA	NA
TCGA-IM-A3EB-01	G1(n=288)	2.94707	NA	NA
TCGA-EL-A3ZN-01	G1(n=288)	3.39975	NA	NA
TCGA-EL-A3ZS-01	G1(n=288)	3.50919	NA	NA
TCGA-EL-A3GR-01	G1(n=288)	3.87943	NA	NA
TCGA-ET-A39R-01	G1(n=288)	3.1238	NA	NA
TCGA-ET-A25O-01	G1(n=288)	3.55278	NA	NA
TCGA-BJ-A2N8-01	G1(n=288)	2.53824	NA	NA
TCGA-DJ-A13W-01	G1(n=288)	0.803227	NA	NA
TCGA-EL-A3N2-01	G1(n=288)	3.17316	NA	NA
TCGA-EM-A4FF-01	G1(n=288)	2.93011	NA	NA
TCGA-KS-A4I3-01	G1(n=288)	3.12304	NA	NA
TCGA-EM-A1CV-01	G1(n=288)	3.62301	NA	NA
TCGA-BJ-A3PR-01	G1(n=288)	2.65437	NA	NA
TCGA-BJ-A45J-01	G1(n=288)	2.7904	NA	NA
TCGA-EM-A3SY-01	G1(n=288)	1.44446	NA	NA
TCGA-FK-A3S3-01	G1(n=288)	2.63234	NA	NA
TCGA-FY-A3NP-01	G1(n=288)	3.13736	NA	NA
TCGA-FY-A3BL-01	G1(n=288)	3.07789	NA	NA
TCGA-MK-A4N6-01	G1(n=288)	3.23854	NA	NA
TCGA-E8-A437-01	G1(n=288)	2.30856	NA	NA
TCGA-EM-A3FL-01	G1(n=288)	2.41913	NA	NA
TCGA-J8-A3YH-01	G1(n=288)	3.06342	NA	NA
TCGA-E8-A433-01	G1(n=288)	2.24315	NA	NA
TCGA-E8-A2EA-01	G1(n=288)	2.4836	NA	NA
TCGA-ET-A3BU-01	G1(n=288)	3.19271	NA	NA
TCGA-EL-A4K0-01	G1(n=288)	3.52851	NA	NA
TCGA-DJ-A2PR-01	G1(n=288)	3.53967	NA	NA
TCGA-DJ-A3VJ-01	G1(n=288)	3.02586	NA	NA
TCGA-ET-A3DO-01	G1(n=288)	2.64402	NA	NA
TCGA-DJ-A3UV-01	G1(n=288)	3.07423	NA	NA
TCGA-J8-A3O2-06	G1(n=288)	3.39694	NA	NA
TCGA-IM-A4EB-01	G1(n=288)	2.15261	NA	NA
TCGA-FE-A234-01	G1(n=288)	3.10029	NA	NA
TCGA-EM-A2CQ-01	G1(n=288)	3.22294	NA	NA
TCGA-FY-A40K-01	G1(n=288)	3.46882	NA	NA
TCGA-ET-A40P-01	G1(n=288)	2.31525	NA	NA
TCGA-EL-A4KH-01	G1(n=288)	1.91793	NA	NA
TCGA-CE-A27D-01	G1(n=288)	2.81174	NA	NA
TCGA-KS-A4I7-01	G1(n=288)	2.96706	NA	NA
TCGA-EM-A3SZ-01	G1(n=288)	2.75339	NA	NA
TCGA-DJ-A4V4-01	G1(n=288)	2.47516	NA	NA
TCGA-EL-A4KG-01	G1(n=288)	3.15666	NA	NA
TCGA-FE-A3PD-01	G1(n=288)	3.02675	NA	NA
TCGA-ET-A40R-01	G1(n=288)	2.66054	NA	NA
TCGA-EM-A4FK-01	G1(n=288)	3.36251	NA	NA
TCGA-BJ-A2N9-01	G1(n=288)	1.87007	NA	NA
TCGA-EM-A22Q-01	G1(n=288)	1.64533	NA	NA
TCGA-FE-A23A-01	G1(n=288)	2.42046	NA	NA
TCGA-J8-A3O0-01	G1(n=288)	3.21926	NA	NA
TCGA-IM-A3ED-01	G1(n=288)	3.52678	NA	NA
TCGA-BJ-A18Y-01	G1(n=288)	3.13777	NA	NA
TCGA-EL-A3GZ-01	G1(n=288)	3.33152	NA	NA
TCGA-BJ-A0ZJ-01	G1(n=288)	3.12502	NA	NA
TCGA-FE-A232-01	G1(n=288)	2.98968	NA	NA
TCGA-DJ-A3UP-01	G1(n=288)	3.39432	NA	NA
TCGA-DJ-A1QN-01	G1(n=288)	3.73293	NA	NA
TCGA-EM-A3AJ-01	G1(n=288)	3.13162	NA	NA
TCGA-BJ-A45K-01	G1(n=288)	3.38297	NA	NA
TCGA-DJ-A3V2-01	G1(n=288)	2.90929	NA	NA
TCGA-J8-A3O2-01	G1(n=288)	3.52668	NA	NA
TCGA-ET-A3BN-01	G1(n=288)	3.54175	NA	NA
TCGA-FY-A3R9-01	G1(n=288)	2.18202	NA	NA
TCGA-KS-A41J-01	G1(n=288)	2.32567	NA	NA
TCGA-EL-A4K2-01	G1(n=288)	3.03065	NA	NA
TCGA-FY-A3WA-01	G1(n=288)	3.90259	NA	NA
TCGA-DJ-A13S-01	G1(n=288)	2.61266	NA	NA
TCGA-EM-A2P1-06	G1(n=288)	3.15165	NA	NA
TCGA-DJ-A3US-01	G1(n=288)	3.17747	NA	NA
TCGA-ET-A39N-01	G1(n=288)	2.75544	NA	NA
TCGA-EM-A4FV-01	G1(n=288)	3.33868	NA	NA
TCGA-ET-A40T-01	G1(n=288)	3.08802	NA	NA
TCGA-ET-A25J-01	G1(n=288)	3.20671	NA	NA
TCGA-BJ-A28R-01	G1(n=288)	3.28457	NA	NA
TCGA-BJ-A3F0-01	G1(n=288)	2.7062	NA	NA
TCGA-E3-A3E1-01	G1(n=288)	3.03129	NA	NA
TCGA-DJ-A3UM-01	G1(n=288)	3.01904	NA	NA
TCGA-BJ-A291-01	G1(n=288)	2.17214	NA	NA
TCGA-E8-A417-01	G1(n=288)	3.09092	NA	NA
TCGA-FE-A235-01	G1(n=288)	2.78031	NA	NA
TCGA-CE-A483-01	G1(n=288)	3.16036	NA	NA
TCGA-KS-A41F-01	G1(n=288)	2.31464	NA	NA
TCGA-ET-A39S-01	G1(n=288)	3.14763	NA	NA
TCGA-DJ-A3VL-01	G1(n=288)	2.40215	NA	NA
TCGA-ET-A25K-01	G1(n=288)	3.27571	NA	NA
TCGA-ET-A3BS-01	G1(n=288)	2.58031	NA	NA
TCGA-H2-A421-01	G1(n=288)	2.43856	NA	NA
TCGA-KS-A41I-01	G1(n=288)	1.17005	NA	NA
TCGA-EL-A3GO-01	G1(n=288)	3.14253	NA	NA
TCGA-EM-A2CL-01	G1(n=288)	3.4076	NA	NA
TCGA-MK-A4N7-01	G1(n=288)	3.40305	NA	NA
TCGA-CE-A13K-01	G1(n=288)	3.07142	NA	NA
TCGA-DJ-A1QQ-01	G1(n=288)	3.75501	NA	NA
TCGA-EL-A3H3-01	G1(n=288)	2.87373	NA	NA
TCGA-DJ-A4UP-01	G1(n=288)	2.88922	NA	NA
TCGA-DE-A7U5-01	G1(n=288)	2.94141	NA	NA
TCGA-DJ-A3VA-01	G1(n=288)	3.36606	NA	NA
TCGA-DJ-A4UT-01	G1(n=288)	2.86201	NA	NA
TCGA-ET-A25I-01	G1(n=288)	1.97618	NA	NA
TCGA-BJ-A45E-01	G1(n=288)	1.77214	NA	NA
TCGA-EM-A2CT-01	G1(n=288)	3.45547	NA	NA
TCGA-FY-A3ON-01	G1(n=288)	3.55309	NA	NA
TCGA-BJ-A28W-01	G1(n=288)	1.9172	NA	NA
TCGA-EL-A3CX-01	G1(n=288)	2.74795	NA	NA
TCGA-DJ-A4V2-01	G1(n=288)	3.10029	NA	NA
TCGA-ET-A39M-01	G1(n=288)	1.94103	NA	NA
TCGA-FK-A3SB-01	G1(n=288)	3.17597	NA	NA
TCGA-H2-A422-01	G1(n=288)	3.39838	NA	NA
TCGA-DJ-A3UT-01	G1(n=288)	2.64683	NA	NA
TCGA-FK-A3SD-01	G1(n=288)	2.40324	NA	NA
TCGA-FY-A4B0-01	G1(n=288)	3.84585	NA	NA
TCGA-ET-A2MZ-01	G1(n=288)	3.36544	NA	NA
TCGA-E8-A2JQ-01	G1(n=288)	2.46231	NA	NA
TCGA-ET-A39L-01	G1(n=288)	3.45891	NA	NA
TCGA-EM-A3AP-01	G1(n=288)	3.24911	NA	NA
TCGA-MK-A4N9-01	G1(n=288)	3.27033	NA	NA
TCGA-DJ-A2PN-01	G1(n=288)	3.3859	NA	NA
TCGA-E3-A3DY-01	G1(n=288)	3.30067	NA	NA
TCGA-DJ-A3VD-01	G1(n=288)	3.17771	NA	NA
TCGA-ET-A3DP-01	G1(n=288)	4.03031	NA	NA
TCGA-EL-A4JW-01	G1(n=288)	3.28536	NA	NA
TCGA-E8-A415-01	G1(n=288)	3.22733	NA	NA
TCGA-ET-A3DU-01	G1(n=288)	2.31548	NA	NA
TCGA-FK-A3SE-01	G1(n=288)	3.29634	NA	NA
TCGA-DE-A69J-01	G1(n=288)	3.17862	NA	NA
TCGA-EL-A4K4-01	G1(n=288)	2.64635	NA	NA
TCGA-ET-A39I-01	G1(n=288)	3.2539	NA	NA
TCGA-EL-A3CZ-01	G1(n=288)	3.50916	NA	NA
TCGA-DJ-A1QG-01	G1(n=288)	2.53421	NA	NA
TCGA-GE-A2C6-01	G1(n=288)	3.6516	NA	NA
TCGA-DJ-A3UN-01	G1(n=288)	3.21174	NA	NA
TCGA-EL-A3ZP-01	G1(n=288)	2.68104	NA	NA
TCGA-J8-A3YE-01	G1(n=288)	2.86271	NA	NA
TCGA-DJ-A13T-01	G1(n=288)	3.62442	NA	NA
TCGA-EM-A3FQ-01	G1(n=288)	3.06991	NA	NA
TCGA-DJ-A3UY-01	G1(n=288)	3.08763	NA	NA
TCGA-FE-A230-01	G1(n=288)	3.03923	NA	NA
TCGA-EL-A3H1-01	G1(n=288)	3.18344	NA	NA
TCGA-DJ-A2PS-01	G1(n=288)	3.40039	NA	NA
TCGA-EM-A1CU-01	G1(n=288)	3.01067	NA	NA
TCGA-ET-A40Q-01	G1(n=288)	2.66846	NA	NA
TCGA-EL-A3ZH-01	G1(n=288)	3.13863	NA	NA
TCGA-ET-A3BQ-01	G1(n=288)	3.07267	NA	NA
TCGA-ET-A3BX-01	G1(n=288)	3.46724	NA	NA
TCGA-EL-A3ZL-01	G1(n=288)	2.74203	NA	NA
TCGA-EM-A22N-01	G1(n=288)	2.19661	NA	NA
TCGA-BJ-A2N7-01	G1(n=288)	2.86687	NA	NA
TCGA-DJ-A1QD-01	G1(n=288)	3.23663	NA	NA
TCGA-BJ-A45D-01	G1(n=288)	2.09869	NA	NA
TCGA-ET-A2MX-01	G1(n=288)	2.29493	NA	NA
TCGA-EM-A3AN-01	G1(n=288)	3.30607	NA	NA
TCGA-CE-A482-01	G1(n=288)	2.94161	NA	NA
TCGA-FY-A3RA-01	G1(n=288)	3.18971	NA	NA
TCGA-DE-A0Y2-01	G1(n=288)	3.57577	NA	NA
TCGA-BJ-A0ZG-01	G1(n=288)	3.28989	NA	NA
TCGA-DJ-A2PQ-01	G1(n=288)	3.07572	NA	NA
TCGA-DJ-A3VG-01	G1(n=288)	2.68347	NA	NA
TCGA-E8-A434-01	G1(n=288)	3.13722	NA	NA
TCGA-DJ-A2Q6-01	G1(n=288)	3.63522	NA	NA
TCGA-DJ-A2Q1-01	G1(n=288)	2.11733	NA	NA
TCGA-EM-A2P3-01	G1(n=288)	3.34328	NA	NA
TCGA-BJ-A28T-01	G1(n=288)	3.06368	NA	NA
TCGA-ET-A39O-01	G1(n=288)	2.60649	NA	NA
TCGA-EL-A3T1-01	G1(n=288)	3.14988	NA	NA
TCGA-E8-A44M-01	G1(n=288)	2.78605	NA	NA
TCGA-EM-A1CS-01	G1(n=288)	3.85913	NA	NA
TCGA-CE-A485-01	G1(n=288)	3.46133	NA	NA
TCGA-BJ-A0Z3-01	G1(n=288)	3.09177	NA	NA
TCGA-EL-A3ZK-01	G1(n=288)	2.94815	NA	NA
TCGA-EM-A3FJ-01	G1(n=288)	3.07705	NA	NA
TCGA-E8-A44K-01	G1(n=288)	2.37412	NA	NA
TCGA-EL-A3H8-01	G1(n=288)	3.60144	NA	NA
TCGA-BJ-A191-01	G1(n=288)	3.26239	NA	NA
TCGA-FY-A40M-01	G1(n=288)	3.38222	NA	NA
TCGA-EM-A2OZ-01	G1(n=288)	3.44648	NA	NA
TCGA-BJ-A28X-01	G1(n=288)	3.11766	NA	NA
TCGA-EL-A3GW-01	G1(n=288)	3.24045	NA	NA
TCGA-EM-A3FQ-06	G1(n=288)	2.25372	NA	NA
TCGA-IM-A41Y-01	G1(n=288)	2.70682	NA	NA
TCGA-DJ-A13L-01	G1(n=288)	2.71752	NA	NA
TCGA-DO-A1JZ-01	G1(n=288)	3.13601	NA	NA
TCGA-ET-A2MY-01	G1(n=288)	2.67875	NA	NA
TCGA-EL-A3T8-01	G1(n=288)	3.23123	NA	NA
TCGA-ET-A25P-01	G1(n=288)	3.18812	NA	NA
TCGA-EM-A3FK-01	G1(n=288)	3.83219	NA	NA
TCGA-H2-A3RI-01	G1(n=288)	3.11392	NA	NA
TCGA-DJ-A3V8-01	G1(n=288)	2.82611	NA	NA
TCGA-EM-A3SU-06	G1(n=288)	3.16187	NA	NA
TCGA-EL-A3CV-01	G1(n=288)	3.46222	NA	NA
TCGA-BJ-A45F-01	G1(n=288)	2.01368	NA	NA
TCGA-KS-A41L-01	G1(n=288)	2.52527	NA	NA
TCGA-DO-A1K0-01	G1(n=288)	3.30175	NA	NA
TCGA-EM-A3SX-01	G1(n=288)	3.58604	NA	NA
TCGA-ET-A39J-01	G1(n=288)	3.38707	NA	NA
TCGA-L6-A4EP-01	G1(n=288)	2.33808	NA	NA
TCGA-DJ-A13V-01	G1(n=288)	3.12436	NA	NA
TCGA-DE-A2OL-01	G1(n=288)	3.5654	NA	NA
TCGA-FY-A3I4-01	G1(n=288)	3.00491	NA	NA
TCGA-EM-A4FQ-01	G1(n=288)	2.23017	NA	NA
TCGA-EM-A2P1-01	G1(n=288)	2.70989	NA	NA
TCGA-EL-A3GQ-01	G1(n=288)	3.61188	NA	NA
TCGA-EL-A4JV-01	G1(n=288)	2.7608	NA	NA
TCGA-EL-A3D1-01	G1(n=288)	2.13675	NA	NA
TCGA-KS-A4ID-01	G1(n=288)	2.11929	NA	NA
TCGA-FY-A40N-01	G1(n=288)	3.64936	NA	NA
TCGA-FE-A233-01	G1(n=288)	3.57882	NA	NA
TCGA-DJ-A4UW-01	G1(n=288)	2.628	NA	NA
TCGA-EM-A3AL-01	G1(n=288)	3.18276	NA	NA
TCGA-J8-A3YH-06	G1(n=288)	3.04319	NA	NA
TCGA-FE-A236-01	G1(n=288)	3.5496	NA	NA
TCGA-EM-A3AK-01	G1(n=288)	3.22523	NA	NA
TCGA-KS-A4I9-01	G1(n=288)	2.62384	NA	NA
TCGA-EM-A2CJ-01	G1(n=288)	2.9226	NA	NA
TCGA-CE-A484-01	G1(n=288)	2.78237	NA	NA
TCGA-ET-A25M-01	G1(n=288)	2.96018	NA	NA
TCGA-DJ-A13M-01	G1(n=288)	2.27932	NA	NA
TCGA-ET-A3BP-01	G1(n=288)	2.31478	NA	NA
TCGA-EL-A3TA-01	G1(n=288)	2.81771	NA	NA
TCGA-IM-A3U3-01	G1(n=288)	2.78912	NA	NA
TCGA-EM-A2CP-01	G1(n=288)	2.80597	NA	NA
TCGA-EM-A22L-01	G1(n=288)	3.38538	NA	NA
TCGA-DE-A4M9-01	G1(n=288)	3.66998	NA	NA
TCGA-DJ-A3UK-01	G1(n=288)	3.38673	NA	NA
TCGA-DE-A4MC-01	G1(n=288)	2.61742	NA	NA
TCGA-ET-A3BW-01	G1(n=288)	3.74864	NA	NA
TCGA-E8-A413-01	G1(n=288)	3.14672	NA	NA
TCGA-FK-A3SG-01	G1(n=288)	2.65203	NA	NA
TCGA-EM-A22M-01	G1(n=288)	2.05374	NA	NA
TCGA-EL-A3CY-01	G1(n=288)	3.55391	NA	NA
TCGA-FE-A3PB-01	G1(n=288)	2.55152	NA	NA
TCGA-EM-A3AR-01	G1(n=288)	3.24361	NA	NA
TCGA-EM-A3OB-01	G1(n=288)	2.95773	NA	NA
TCGA-DJ-A3UX-01	G1(n=288)	3.21782	NA	NA
TCGA-KS-A4I1-01	G1(n=288)	2.80418	NA	NA
TCGA-EL-A3ZG-01	G1(n=288)	2.60711	NA	NA
TCGA-ET-A3DT-01	G1(n=288)	2.78835	NA	NA
TCGA-EL-A3GX-01	G1(n=288)	3.42432	NA	NA
TCGA-EM-A2OW-01	G1(n=288)	2.24083	NA	NA
TCGA-DJ-A3VE-01	G1(n=288)	3.26001	NA	NA
TCGA-BJ-A2P4-01	G1(n=288)	2.24935	NA	NA
TCGA-EM-A4FU-01	G1(n=288)	2.16707	NA	NA
TCGA-FE-A3PC-01	G1(n=288)	2.01689	NA	NA
TCGA-EM-A3SU-01	G1(n=288)	2.12032	NA	NA
TCGA-EM-A4G1-01	G1(n=288)	2.71108	NA	NA
TCGA-KS-A4IB-01	G1(n=288)	2.59822	NA	NA
TCGA-ET-A3DR-01	G1(n=288)	3.80323	NA	NA
TCGA-ET-A25N-01	G1(n=288)	3.38235	NA	NA
TCGA-CE-A3MD-01	G1(n=288)	2.75909	NA	NA
TCGA-EM-A3FN-01	G1(n=288)	2.1237	NA	NA
TCGA-DJ-A2PX-01	G1(n=288)	2.64614	NA	NA
TCGA-EM-A2P0-01	G1(n=288)	3.76379	NA	NA
TCGA-EL-A3GS-01	G1(n=288)	3.49289	NA	NA
TCGA-EM-A4FR-01	G1(n=288)	2.10403	NA	NA
TCGA-EL-A4KD-01	G1(n=288)	2.78998	NA	NA
TCGA-FE-A238-01	G1(n=288)	3.28248	NA	NA
TCGA-DJ-A3UW-01	G1(n=288)	2.15614	NA	NA
TCGA-EM-A3AQ-01	G1(n=288)	3.06179	NA	NA
TCGA-EL-A4JX-01	G1(n=288)	2.54102	NA	NA
TCGA-EL-A3D5-01	G1(n=288)	3.87558	NA	NA
TCGA-ET-A3DQ-01	G1(n=288)	2.72535	NA	NA
TCGA-FE-A3PA-01	G2(n=52)	2.46874	NA	NA
TCGA-FY-A76V-01	G2(n=52)	3.09151	NA	NA
TCGA-EM-A2CR-01	G2(n=52)	2.14636	NA	NA
TCGA-BJ-A190-01	G2(n=52)	3.11562	NA	NA
TCGA-ET-A3DV-01	G2(n=52)	3.37701	NA	NA
TCGA-DJ-A4UR-01	G2(n=52)	2.33485	NA	NA
TCGA-EM-A3AI-01	G2(n=52)	2.53518	NA	NA
TCGA-EM-A1YD-01	G2(n=52)	3.03474	NA	NA
TCGA-DJ-A2PV-01	G2(n=52)	3.53387	NA	NA
TCGA-EM-A3O6-01	G2(n=52)	2.26132	NA	NA
TCGA-EM-A3FP-01	G2(n=52)	2.38728	NA	NA
TCGA-DJ-A13P-01	G2(n=52)	3.30258	NA	NA
TCGA-EL-A4K9-01	G2(n=52)	3.21791	NA	NA
TCGA-EL-A3CL-01	G2(n=52)	3.97359	NA	NA
TCGA-EM-A3OA-01	G2(n=52)	2.72102	NA	NA
TCGA-EL-A3MW-01	G2(n=52)	3.2854	NA	NA
TCGA-DJ-A1QF-01	G2(n=52)	3.51143	NA	NA
TCGA-DJ-A2PP-01	G2(n=52)	2.96804	NA	NA
TCGA-DJ-A2PU-01	G2(n=52)	3.29225	NA	NA
TCGA-ET-A40S-01	G2(n=52)	2.99045	NA	NA
TCGA-BJ-A0ZF-01	G2(n=52)	2.99095	NA	NA
TCGA-EM-A1YA-01	G2(n=52)	2.52484	NA	NA
TCGA-DJ-A3V3-01	G2(n=52)	2.78618	NA	NA
TCGA-BJ-A0ZA-01	G2(n=52)	3.31859	NA	NA
TCGA-BJ-A0Z0-01	G2(n=52)	3.43904	NA	NA
TCGA-EL-A3H2-01	G2(n=52)	3.57289	NA	NA
TCGA-DJ-A2QC-01	G2(n=52)	2.34959	NA	NA
TCGA-EL-A3CN-01	G2(n=52)	2.8984	NA	NA
TCGA-EL-A3GY-01	G2(n=52)	3.23899	NA	NA
TCGA-E8-A432-01	G2(n=52)	3.34439	NA	NA
TCGA-EL-A3T7-01	G2(n=52)	3.04591	NA	NA
TCGA-DJ-A3VM-01	G2(n=52)	2.74534	NA	NA
TCGA-BJ-A28S-01	G2(n=52)	3.33181	NA	NA
TCGA-BJ-A4O9-01	G2(n=52)	3.2879	NA	NA
TCGA-BJ-A0YZ-01	G2(n=52)	3.03274	NA	NA
TCGA-EL-A3ZR-01	G2(n=52)	3.27577	NA	NA
TCGA-EM-A1YB-01	G2(n=52)	2.2017	NA	NA
TCGA-FY-A3W9-01	G2(n=52)	3.63088	NA	NA
TCGA-DJ-A1QL-01	G2(n=52)	3.12078	NA	NA
TCGA-DJ-A1QI-01	G2(n=52)	3.45009	NA	NA
TCGA-EL-A3N3-01	G2(n=52)	2.79298	NA	NA
TCGA-EM-A2OV-01	G2(n=52)	3.05754	NA	NA
TCGA-EL-A3T3-01	G2(n=52)	2.86758	NA	NA
TCGA-CE-A3ME-01	G2(n=52)	3.52398	NA	NA
TCGA-E3-A3E3-01	G2(n=52)	2.97834	NA	NA
TCGA-EM-A22J-01	G2(n=52)	2.73207	NA	NA
TCGA-EL-A3ZQ-01	G2(n=52)	1.64413	NA	NA
TCGA-DJ-A2Q0-01	G2(n=52)	1.67414	NA	NA
TCGA-EM-A2CO-01	G2(n=52)	2.02187	NA	NA
TCGA-EM-A2OY-01	G2(n=52)	1.85312	NA	NA
TCGA-EM-A1YE-01	G2(n=52)	2.34065	NA	NA
TCGA-ET-A4KQ-01	G2(n=52)	3.29596	NA	NA
TCGA-ET-A2N0-01	G3(n=113)	1.80529	NA	NA
TCGA-EM-A1YC-01	G3(n=113)	2.49431	NA	NA
TCGA-MK-A84Z-01	G3(n=113)	2.87267	NA	NA
TCGA-FY-A3NN-01	G3(n=113)	2.75916	NA	NA
TCGA-DJ-A1QO-01	G3(n=113)	2.94473	NA	NA
TCGA-EL-A3GV-01	G3(n=113)	3.56541	NA	NA
TCGA-BJ-A2NA-01	G3(n=113)	3.19398	NA	NA
TCGA-EL-A3CM-01	G3(n=113)	2.60393	NA	NA
TCGA-EM-A3O3-01	G3(n=113)	2.1237	NA	NA
TCGA-FY-A3TY-01	G3(n=113)	3.33378	NA	NA
TCGA-EL-A3D6-01	G3(n=113)	2.46142	NA	NA
TCGA-J8-A3YF-01	G3(n=113)	2.67717	NA	NA
TCGA-ET-A25G-01	G3(n=113)	2.76082	NA	NA
TCGA-EM-A3FR-01	G3(n=113)	2.97402	NA	NA
TCGA-BJ-A3PT-01	G3(n=113)	2.72332	NA	NA
TCGA-DJ-A2Q7-01	G3(n=113)	3.16822	NA	NA
TCGA-FK-A3SH-01	G3(n=113)	2.67238	NA	NA
TCGA-DJ-A13X-01	G3(n=113)	3.53453	NA	NA
TCGA-EL-A3CU-01	G3(n=113)	3.31995	NA	NA
TCGA-J8-A3YD-01	G3(n=113)	3.21678	NA	NA
TCGA-FY-A3YR-01	G3(n=113)	2.4457	NA	NA
TCGA-BJ-A28V-01	G3(n=113)	3.70114	NA	NA
TCGA-E8-A242-01	G3(n=113)	2.46994	NA	NA
TCGA-EL-A3CR-01	G3(n=113)	2.76568	NA	NA
TCGA-FE-A239-01	G3(n=113)	2.82806	NA	NA
TCGA-DE-A69K-01	G3(n=113)	3.106	NA	NA
TCGA-EL-A3D0-01	G3(n=113)	3.2201	NA	NA
TCGA-EM-A2CM-01	G3(n=113)	2.36432	NA	NA
TCGA-EL-A4K1-01	G3(n=113)	1.5478	NA	NA
TCGA-DJ-A2QA-01	G3(n=113)	1.98586	NA	NA
TCGA-ET-A3BV-01	G3(n=113)	3.24123	NA	NA
TCGA-EL-A4KI-01	G3(n=113)	2.0371	NA	NA
TCGA-DJ-A3VB-01	G3(n=113)	2.51465	NA	NA
TCGA-J8-A3YG-01	G3(n=113)	3.21154	NA	NA
TCGA-EL-A3T2-01	G3(n=113)	3.64308	NA	NA
TCGA-ET-A39K-01	G3(n=113)	2.11693	NA	NA
TCGA-H2-A26U-01	G3(n=113)	3.27492	NA	NA
TCGA-BJ-A45H-01	G3(n=113)	3.02878	NA	NA
TCGA-EM-A2P2-01	G3(n=113)	2.81934	NA	NA
TCGA-EL-A4K7-01	G3(n=113)	2.2708	NA	NA
TCGA-DJ-A3V4-01	G3(n=113)	2.86534	NA	NA
TCGA-FY-A3R8-01	G3(n=113)	3.04597	NA	NA
TCGA-DJ-A3UU-01	G3(n=113)	3.06499	NA	NA
TCGA-DJ-A3UQ-01	G3(n=113)	3.07097	NA	NA
TCGA-ET-A2N4-01	G3(n=113)	3.03963	NA	NA
TCGA-J8-A42S-01	G3(n=113)	3.39582	NA	NA
TCGA-J8-A4HW-01	G3(n=113)	3.59429	NA	NA
TCGA-FK-A4UB-01	G3(n=113)	2.38631	NA	NA
TCGA-DJ-A2PW-01	G3(n=113)	3.17739	NA	NA
TCGA-EL-A3MZ-01	G3(n=113)	2.57589	NA	NA
TCGA-BJ-A45C-01	G3(n=113)	3.11187	NA	NA
TCGA-EL-A3TB-01	G3(n=113)	2.74681	NA	NA
TCGA-BJ-A45G-01	G3(n=113)	3.1274	NA	NA
TCGA-DE-A0XZ-01	G3(n=113)	3.34706	NA	NA
TCGA-BJ-A45I-01	G3(n=113)	3.00558	NA	NA
TCGA-DJ-A2PZ-01	G3(n=113)	2.76328	NA	NA
TCGA-DJ-A3V7-01	G3(n=113)	2.85693	NA	NA
TCGA-DJ-A2Q4-01	G3(n=113)	3.13373	NA	NA
TCGA-DJ-A3UR-01	G3(n=113)	3.1941	NA	NA
TCGA-DJ-A3V5-01	G3(n=113)	3.02464	NA	NA
TCGA-DJ-A1QH-01	G3(n=113)	3.29536	NA	NA
TCGA-BJ-A3PU-01	G3(n=113)	2.15885	NA	NA
TCGA-BJ-A192-01	G3(n=113)	3.36011	NA	NA
TCGA-E8-A414-01	G3(n=113)	3.75232	NA	NA
TCGA-BJ-A0Z5-01	G3(n=113)	2.72172	NA	NA
TCGA-ET-A3DW-01	G3(n=113)	2.95764	NA	NA
TCGA-EM-A22I-01	G3(n=113)	2.73641	NA	NA
TCGA-DJ-A2Q3-01	G3(n=113)	3.08609	NA	NA
TCGA-L6-A4EU-01	G3(n=113)	2.24379	NA	NA
TCGA-DJ-A3UZ-01	G3(n=113)	3.28056	NA	NA
TCGA-DJ-A2PY-01	G3(n=113)	3.16789	NA	NA
TCGA-EL-A3GP-01	G3(n=113)	2.87432	NA	NA
TCGA-EM-A3O7-01	G3(n=113)	3.43313	NA	NA
TCGA-EM-A2CU-01	G3(n=113)	2.79772	NA	NA
TCGA-ET-A4KN-01	G3(n=113)	1.1375	NA	NA
TCGA-FY-A3R7-01	G3(n=113)	3.37898	NA	NA
TCGA-DJ-A2Q2-01	G3(n=113)	3.33878	NA	NA
TCGA-DJ-A1QE-01	G3(n=113)	3.33246	NA	NA
TCGA-DJ-A13U-01	G3(n=113)	3.23223	NA	NA
TCGA-EL-A4JZ-01	G3(n=113)	3.05	NA	NA
TCGA-J8-A4HW-06	G3(n=113)	3.4861	NA	NA
TCGA-BJ-A0ZE-01	G3(n=113)	1.68037	NA	NA
TCGA-EM-A4FH-01	G3(n=113)	3.01548	NA	NA
TCGA-EL-A3CW-01	G3(n=113)	2.98249	NA	NA
TCGA-EM-A3ST-01	G3(n=113)	2.3444	NA	NA
TCGA-BJ-A290-01	G3(n=113)	3.1322	NA	NA
TCGA-FY-A3I5-01	G3(n=113)	3.00646	NA	NA
TCGA-FY-A4B4-01	G3(n=113)	3.40652	NA	NA
TCGA-FY-A4B3-01	G3(n=113)	3.72611	NA	NA
TCGA-ET-A39P-01	G3(n=113)	2.82644	NA	NA
TCGA-DJ-A13R-01	G3(n=113)	1.12974	NA	NA
TCGA-EL-A3CO-01	G3(n=113)	3.8741	NA	NA
TCGA-KS-A4IC-01	G3(n=113)	2.85577	NA	NA
TCGA-DJ-A2PT-01	G3(n=113)	2.30923	NA	NA
TCGA-ET-A25R-01	G3(n=113)	2.95853	NA	NA
TCGA-EL-A3GU-01	G3(n=113)	2.596	NA	NA
TCGA-DJ-A2Q9-01	G3(n=113)	3.01753	NA	NA
TCGA-J8-A3NZ-01	G3(n=113)	3.31354	NA	NA
TCGA-E3-A3DZ-01	G3(n=113)	3.44843	NA	NA
TCGA-DJ-A3VI-01	G3(n=113)	2.80356	NA	NA
TCGA-DJ-A3VK-01	G3(n=113)	2.94188	NA	NA
TCGA-BJ-A0Z9-01	G3(n=113)	3.61255	NA	NA
TCGA-EL-A3ZO-01	G3(n=113)	2.20877	NA	NA
TCGA-DE-A4M8-01	G3(n=113)	2.31484	NA	NA
TCGA-BJ-A28Z-01	G3(n=113)	2.46738	NA	NA
TCGA-EL-A3T0-01	G3(n=113)	3.38463	NA	NA
TCGA-DJ-A3V6-01	G3(n=113)	2.75037	NA	NA
TCGA-BJ-A4O8-01	G3(n=113)	3.03977	NA	NA
TCGA-DE-A4MA-01	G3(n=113)	1.75792	NA	NA
TCGA-ET-A2N5-01	G3(n=113)	2.39314	NA	NA
TCGA-ET-A39T-01	G3(n=113)	2.96717	NA	NA
TCGA-L6-A4EQ-01	G3(n=113)	2.82481	NA	NA
TCGA-FY-A3NM-01	G3(n=113)	3.35483	NA	NA
TCGA-KS-A4I5-01	G4(n=57)	3.44984	NA	NA
TCGA-EM-A4FM-01	G4(n=57)	2.33657	NA	NA
TCGA-DJ-A3V9-01	G4(n=57)	3.76066	NA	NA
TCGA-E8-A436-01	G4(n=57)	3.02669	NA	NA
TCGA-EM-A2OX-01	G4(n=57)	3.24592	NA	NA
TCGA-DE-A0Y3-01	G4(n=57)	3.34022	NA	NA
TCGA-EL-A3CT-01	G4(n=57)	3.00659	NA	NA
TCGA-EM-A22O-01	G4(n=57)	3.18715	NA	NA
TCGA-DE-A3KN-01	G4(n=57)	3.07265	NA	NA
TCGA-FE-A22Z-01	G4(n=57)	2.9451	NA	NA
TCGA-E8-A418-01	G4(n=57)	3.05466	NA	NA
TCGA-EL-A3D4-01	G4(n=57)	2.70828	NA	NA
TCGA-EM-A2CN-01	G4(n=57)	2.85872	NA	NA
TCGA-EM-A3AO-01	G4(n=57)	2.55572	NA	NA
TCGA-DJ-A4V5-01	G4(n=57)	3.20242	NA	NA
TCGA-EL-A3H5-01	G4(n=57)	1.52472	NA	NA
TCGA-EL-A3T9-01	G4(n=57)	2.53124	NA	NA
TCGA-EM-A3FM-01	G4(n=57)	2.1036	NA	NA
TCGA-QD-A8IV-01	G4(n=57)	3.17242	NA	NA
TCGA-EM-A2CS-01	G4(n=57)	3.73278	NA	NA
TCGA-EL-A3ZM-01	G4(n=57)	1.69942	NA	NA
TCGA-DJ-A3V0-01	G4(n=57)	2.6237	NA	NA
TCGA-ET-A3BT-01	G4(n=57)	3.09302	NA	NA
TCGA-J8-A4HY-01	G4(n=57)	2.47527	NA	NA
TCGA-EL-A4K6-01	G4(n=57)	2.89726	NA	NA
TCGA-EL-A3MY-01	G4(n=57)	2.89099	NA	NA
TCGA-E8-A3X7-01	G4(n=57)	2.16443	NA	NA
TCGA-BJ-A0ZB-01	G4(n=57)	2.8492	NA	NA
TCGA-EM-A4FN-01	G4(n=57)	1.98758	NA	NA
TCGA-FY-A40L-01	G4(n=57)	2.83752	NA	NA
TCGA-DJ-A3VF-01	G4(n=57)	2.65109	NA	NA
TCGA-BJ-A3EZ-01	G4(n=57)	2.82926	NA	NA
TCGA-DJ-A3UO-01	G4(n=57)	3.1303	NA	NA
TCGA-DE-A4MB-01	G4(n=57)	2.79096	NA	NA
TCGA-DE-A4MD-06	G4(n=57)	1.89278	NA	NA
TCGA-IM-A3U2-01	G4(n=57)	2.23613	NA	NA
TCGA-EM-A2CS-06	G4(n=57)	2.98176	NA	NA
TCGA-DJ-A2Q5-01	G4(n=57)	3.14807	NA	NA
TCGA-BJ-A0ZH-01	G4(n=57)	2.59989	NA	NA
TCGA-DJ-A2QB-01	G4(n=57)	2.8048	NA	NA
TCGA-DJ-A4UQ-01	G4(n=57)	3.49507	NA	NA
TCGA-BJ-A0Z2-01	G4(n=57)	3.41041	NA	NA
TCGA-ET-A25L-01	G4(n=57)	2.87279	NA	NA
TCGA-EL-A3MX-01	G4(n=57)	2.76899	NA	NA
TCGA-L6-A4ET-01	G4(n=57)	3.08653	NA	NA
TCGA-E3-A3E5-01	G4(n=57)	3.11678	NA	NA
TCGA-BJ-A18Z-01	G4(n=57)	3.09456	NA	NA
TCGA-4C-A93U-01	G4(n=57)	3.17938	NA	NA
TCGA-EL-A3CS-01	G4(n=57)	2.99032	NA	NA
TCGA-FY-A3R6-01	G4(n=57)	2.64388	NA	NA
TCGA-DO-A2HM-01	G4(n=57)	3.4623	NA	NA
TCGA-EM-A22P-01	G4(n=57)	3.42121	NA	NA
TCGA-DE-A4MD-01	G4(n=57)	2.79171	NA	NA
TCGA-EM-A22K-01	G4(n=57)	3.24697	NA	NA
TCGA-EM-A1CT-01	G4(n=57)	3.01369	NA	NA
TCGA-FE-A231-01	G4(n=57)	3.10367	NA	NA
TCGA-EL-A3H4-01	G4(n=57)	3.57213	NA	NA
TCGA-ET-A3DW-11	Normal(n=712)	3.34474	NA	NA
TCGA-EL-A3TA-11	Normal(n=712)	3.2491	NA	NA
TCGA-EL-A3T7-11	Normal(n=712)	3.32734	NA	NA
TCGA-BJ-A3PR-11	Normal(n=712)	2.14486	NA	NA
TCGA-DO-A1JZ-11	Normal(n=712)	3.68532	NA	NA
TCGA-BJ-A28W-11	Normal(n=712)	1.49907	NA	NA
TCGA-BJ-A28R-11	Normal(n=712)	3.06103	NA	NA
TCGA-KS-A41I-11	Normal(n=712)	2.80217	NA	NA
TCGA-EL-A3ZG-11	Normal(n=712)	2.56352	NA	NA
TCGA-BJ-A2N7-11	Normal(n=712)	3.10222	NA	NA
TCGA-EL-A3ZQ-11	Normal(n=712)	3.46917	NA	NA
TCGA-EM-A1CV-11	Normal(n=712)	3.24574	NA	NA
TCGA-BJ-A290-11	Normal(n=712)	3.27258	NA	NA
TCGA-EL-A3ZO-11	Normal(n=712)	3.38307	NA	NA
TCGA-EL-A3T8-11	Normal(n=712)	3.15424	NA	NA
TCGA-H2-A3RI-11	Normal(n=712)	3.29837	NA	NA
TCGA-EL-A3N2-11	Normal(n=712)	3.63841	NA	NA
TCGA-BJ-A28X-11	Normal(n=712)	3.34618	NA	NA
TCGA-EM-A1YC-11	Normal(n=712)	2.2042	NA	NA
TCGA-EL-A3MX-11	Normal(n=712)	3.55785	NA	NA
TCGA-ET-A2N5-11	Normal(n=712)	2.79523	NA	NA
TCGA-EL-A3T2-11	Normal(n=712)	3.45319	NA	NA
TCGA-GE-A2C6-11	Normal(n=712)	3.21959	NA	NA
TCGA-ET-A3DP-11	Normal(n=712)	3.55366	NA	NA
TCGA-BJ-A3PU-11	Normal(n=712)	3.64718	NA	NA
TCGA-EL-A3ZH-11	Normal(n=712)	3.40889	NA	NA
TCGA-EL-A3ZP-11	Normal(n=712)	3.63299	NA	NA
TCGA-EL-A3H2-11	Normal(n=712)	3.49981	NA	NA
TCGA-EM-A1CU-11	Normal(n=712)	3.50241	NA	NA
TCGA-EL-A3T3-11	Normal(n=712)	3.20195	NA	NA
TCGA-H2-A2K9-11	Normal(n=712)	3.34095	NA	NA
TCGA-EM-A3ST-11	Normal(n=712)	2.5049	NA	NA
TCGA-EL-A3H7-11	Normal(n=712)	4.16843	NA	NA
TCGA-EL-A3T6-11	Normal(n=712)	3.81518	NA	NA
TCGA-EL-A3MY-11	Normal(n=712)	3.38573	NA	NA
TCGA-EL-A3TB-11	Normal(n=712)	3.3474	NA	NA
TCGA-FY-A3TY-11	Normal(n=712)	3.52282	NA	NA
TCGA-EL-A3T0-11	Normal(n=712)	3.32359	NA	NA
TCGA-BJ-A2N8-11	Normal(n=712)	3.70901	NA	NA
TCGA-BJ-A2NA-11	Normal(n=712)	3.0763	NA	NA
TCGA-EM-A1CS-11	Normal(n=712)	3.15821	NA	NA
TCGA-EL-A3ZR-11	Normal(n=712)	3.55616	NA	NA
TCGA-EL-A3ZS-11	Normal(n=712)	2.67769	NA	NA
TCGA-EM-A1CW-11	Normal(n=712)	3.48589	NA	NA
TCGA-ET-A2MX-11	Normal(n=712)	2.7467	NA	NA
TCGA-EL-A3ZT-11	Normal(n=712)	3.07451	NA	NA
TCGA-KS-A41L-11	Normal(n=712)	3.18242	NA	NA
TCGA-KS-A41J-11	Normal(n=712)	3.4135	NA	NA
TCGA-EM-A1CT-11	Normal(n=712)	3.18761	NA	NA
TCGA-E8-A2JQ-11	Normal(n=712)	3.54419	NA	NA
TCGA-EL-A3N3-11	Normal(n=712)	3.49589	NA	NA
TCGA-EL-A3H1-11	Normal(n=712)	3.01389	NA	NA
TCGA-EL-A3T1-11	Normal(n=712)	3.69945	NA	NA
TCGA-EL-A3MW-11	Normal(n=712)	3.39498	NA	NA
TCGA-EL-A3ZM-11	Normal(n=712)	2.93437	NA	NA
TCGA-BJ-A2N9-11	Normal(n=712)	2.84334	NA	NA
TCGA-EL-A3ZL-11	Normal(n=712)	3.44774	NA	NA
TCGA-EL-A3GZ-11	Normal(n=712)	3.54045	NA	NA
TCGA-EL-A3ZK-11	Normal(n=712)	3.53026	NA	NA
GTEX-111CU-0226-SM-5GZXC	Normal(n=712)	3.23527	NA	NA
GTEX-111FC-1026-SM-5GZX1	Normal(n=712)	3.00809	NA	NA
GTEX-111VG-0526-SM-5N9BW	Normal(n=712)	2.88479	NA	NA
GTEX-111YS-0726-SM-5GZY8	Normal(n=712)	3.19109	NA	NA
GTEX-1122O-0226-SM-5N9DA	Normal(n=712)	3.05363	NA	NA
GTEX-1128S-0126-SM-5H12S	Normal(n=712)	3.84599	NA	NA
GTEX-113JC-0126-SM-5EGJW	Normal(n=712)	4.59932	NA	NA
GTEX-117XS-0526-SM-5987Q	Normal(n=712)	3.9607	NA	NA
GTEX-117YW-0126-SM-5EGGN	Normal(n=712)	3.75596	NA	NA
GTEX-117YX-1226-SM-5H11S	Normal(n=712)	3.3067	NA	NA
GTEX-1192W-0126-SM-5EGGS	Normal(n=712)	3.66676	NA	NA
GTEX-1192X-1126-SM-5EGGU	Normal(n=712)	3.90689	NA	NA
GTEX-11DXX-0226-SM-5P9HL	Normal(n=712)	3.07228	NA	NA
GTEX-11DXY-0426-SM-5H12R	Normal(n=712)	3.51854	NA	NA
GTEX-11DXZ-0926-SM-5N9CG	Normal(n=712)	3.35417	NA	NA
GTEX-11DYG-0826-SM-5N9GH	Normal(n=712)	3.9279	NA	NA
GTEX-11DZ1-2726-SM-5A5KH	Normal(n=712)	3.83086	NA	NA
GTEX-11EI6-0726-SM-59866	Normal(n=712)	3.35092	NA	NA
GTEX-11EM3-0126-SM-5985K	Normal(n=712)	3.37462	NA	NA
GTEX-11EMC-0226-SM-5EGLP	Normal(n=712)	3.74308	NA	NA
GTEX-11EQ8-0826-SM-5N9FG	Normal(n=712)	4.64847	NA	NA
GTEX-11EQ9-0626-SM-5A5K1	Normal(n=712)	3.19834	NA	NA
GTEX-11GS4-0826-SM-5986J	Normal(n=712)	3.89433	NA	NA
GTEX-11GSO-0626-SM-5A5LW	Normal(n=712)	3.59813	NA	NA
GTEX-11GSP-0126-SM-5A5KU	Normal(n=712)	3.84197	NA	NA
GTEX-11I78-0526-SM-5986A	Normal(n=712)	3.22743	NA	NA
GTEX-11LCK-0526-SM-5A5M9	Normal(n=712)	3.34795	NA	NA
GTEX-11NSD-0126-SM-5987F	Normal(n=712)	3.69042	NA	NA
GTEX-11NUK-1026-SM-5HL5J	Normal(n=712)	3.46467	NA	NA
GTEX-11NV4-0626-SM-5N9BR	Normal(n=712)	3.05398	NA	NA
GTEX-11O72-2326-SM-5BC7H	Normal(n=712)	3.48543	NA	NA
GTEX-11OF3-0626-SM-5BC4Y	Normal(n=712)	3.69599	NA	NA
GTEX-11P7K-0226-SM-5986Z	Normal(n=712)	3.3274	NA	NA
GTEX-11P81-0126-SM-5HL5Y	Normal(n=712)	3.65992	NA	NA
GTEX-11P82-0226-SM-5HL4O	Normal(n=712)	2.93565	NA	NA
GTEX-11TT1-1126-SM-5P9GV	Normal(n=712)	3.1357	NA	NA
GTEX-11TTK-0826-SM-5N9EG	Normal(n=712)	3.14078	NA	NA
GTEX-11TUW-0226-SM-5LU8X	Normal(n=712)	3.43656	NA	NA
GTEX-11UD2-0626-SM-5GU6L	Normal(n=712)	3.36233	NA	NA
GTEX-11VI4-0226-SM-5GU6C	Normal(n=712)	3.26589	NA	NA
GTEX-11XUK-0226-SM-5EQLW	Normal(n=712)	3.33471	NA	NA
GTEX-11ZTS-1126-SM-5LU9X	Normal(n=712)	3.36121	NA	NA
GTEX-11ZTT-1026-SM-5EQKF	Normal(n=712)	3.06419	NA	NA
GTEX-11ZVC-0126-SM-5986G	Normal(n=712)	3.92029	NA	NA
GTEX-1211K-0726-SM-5FQUW	Normal(n=712)	3.12334	NA	NA
GTEX-1212Z-0426-SM-5FQT6	Normal(n=712)	3.70377	NA	NA
GTEX-12584-0826-SM-5FQSK	Normal(n=712)	4.30232	NA	NA
GTEX-12696-0326-SM-5EGL4	Normal(n=712)	3.41981	NA	NA
GTEX-1269C-0226-SM-5EGKS	Normal(n=712)	3.9644	NA	NA
GTEX-12BJ1-0426-SM-5FQSO	Normal(n=712)	3.26903	NA	NA
GTEX-12WSC-0826-SM-5EQ5Q	Normal(n=712)	3.49825	NA	NA
GTEX-12WSD-0926-SM-5GCNL	Normal(n=712)	3.54967	NA	NA
GTEX-12WSE-1226-SM-73KUF	Normal(n=712)	3.19219	NA	NA
GTEX-12WSG-0226-SM-5EGIF	Normal(n=712)	3.16896	NA	NA
GTEX-12WSH-0226-SM-5GCOG	Normal(n=712)	3.64386	NA	NA
GTEX-12WSJ-0326-SM-5GCMT	Normal(n=712)	2.76935	NA	NA
GTEX-12WSK-0926-SM-5CVNQ	Normal(n=712)	3.59335	NA	NA
GTEX-12WSL-0626-SM-5GCOY	Normal(n=712)	3.68032	NA	NA
GTEX-12WSN-0726-SM-5GCMS	Normal(n=712)	3.32106	NA	NA
GTEX-12ZZX-1226-SM-5EGHS	Normal(n=712)	3.57894	NA	NA
GTEX-12ZZY-0826-SM-5EQMT	Normal(n=712)	3.44983	NA	NA
GTEX-12ZZZ-1226-SM-59HK1	Normal(n=712)	3.54597	NA	NA
GTEX-13111-0226-SM-5EQ55	Normal(n=712)	3.33914	NA	NA
GTEX-13112-0326-SM-5P9IW	Normal(n=712)	3.57652	NA	NA
GTEX-13113-0126-SM-5LZVX	Normal(n=712)	3.86987	NA	NA
GTEX-1313W-0726-SM-5EGK1	Normal(n=712)	3.40463	NA	NA
GTEX-131XE-0126-SM-5LZVC	Normal(n=712)	3.66903	NA	NA
GTEX-131XF-1826-SM-5EGKG	Normal(n=712)	3.41724	NA	NA
GTEX-131XG-0226-SM-5IFG1	Normal(n=712)	3.38031	NA	NA
GTEX-131XH-0526-SM-5DUX7	Normal(n=712)	3.26288	NA	NA
GTEX-131YS-0726-SM-5P9G9	Normal(n=712)	3.35191	NA	NA
GTEX-132AR-1126-SM-5P9GA	Normal(n=712)	4.08661	NA	NA
GTEX-132NY-1026-SM-5P9IY	Normal(n=712)	3.52231	NA	NA
GTEX-132QS-0326-SM-5IJFN	Normal(n=712)	3.10484	NA	NA
GTEX-133LE-0326-SM-5P9G4	Normal(n=712)	2.96551	NA	NA
GTEX-1399R-0126-SM-5IFEV	Normal(n=712)	3.17521	NA	NA
GTEX-1399T-0126-SM-5KM15	Normal(n=712)	3.5373	NA	NA
GTEX-1399U-0326-SM-5P9G5	Normal(n=712)	3.41116	NA	NA
GTEX-139T6-0326-SM-5J2LY	Normal(n=712)	3.21132	NA	NA
GTEX-139TS-0126-SM-5K7XJ	Normal(n=712)	3.81865	NA	NA
GTEX-139UW-0126-SM-5KM1B	Normal(n=712)	3.58256	NA	NA
GTEX-139YR-1226-SM-5IFEU	Normal(n=712)	3.67582	NA	NA
GTEX-13CF3-0926-SM-5LZZC	Normal(n=712)	3.4163	NA	NA
GTEX-13D11-0226-SM-5LZXL	Normal(n=712)	2.88206	NA	NA
GTEX-13FH7-0126-SM-5KLZ1	Normal(n=712)	3.11103	NA	NA
GTEX-13FHO-0926-SM-5N9EW	Normal(n=712)	3.63459	NA	NA
GTEX-13FHP-0926-SM-5L3EC	Normal(n=712)	3.50589	NA	NA
GTEX-13FLV-0226-SM-5J2OF	Normal(n=712)	3.87086	NA	NA
GTEX-13FLW-0326-SM-5J2M4	Normal(n=712)	3.35558	NA	NA
GTEX-13FTW-0626-SM-5IFEX	Normal(n=712)	3.24519	NA	NA
GTEX-13FTY-0726-SM-5J2OH	Normal(n=712)	4.0365	NA	NA
GTEX-13FXS-0726-SM-5LZXJ	Normal(n=712)	3.10501	NA	NA
GTEX-13G51-1226-SM-5K7Z3	Normal(n=712)	3.79805	NA	NA
GTEX-13IVO-0926-SM-5KLZP	Normal(n=712)	4.48543	NA	NA
GTEX-13JVG-0926-SM-5IJE1	Normal(n=712)	4.0072	NA	NA
GTEX-13N11-1026-SM-5K7XQ	Normal(n=712)	3.6311	NA	NA
GTEX-13N1W-0826-SM-5MR5J	Normal(n=712)	4.13832	NA	NA
GTEX-13N2G-0726-SM-5MR38	Normal(n=712)	3.59455	NA	NA
GTEX-13NYB-0726-SM-5MR4J	Normal(n=712)	3.04159	NA	NA
GTEX-13NYC-2426-SM-5MR3K	Normal(n=712)	3.42237	NA	NA
GTEX-13NZ8-0226-SM-5J2OK	Normal(n=712)	4.51538	NA	NA
GTEX-13NZ9-1126-SM-5MR37	Normal(n=712)	3.58496	NA	NA
GTEX-13NZA-1026-SM-5MR48	Normal(n=712)	3.1517	NA	NA
GTEX-13O1R-0826-SM-5J2MB	Normal(n=712)	3.69933	NA	NA
GTEX-13O21-2226-SM-5MR3L	Normal(n=712)	3.08882	NA	NA
GTEX-13O3O-0926-SM-5KM1F	Normal(n=712)	3.5435	NA	NA
GTEX-13O3P-0726-SM-5J2OM	Normal(n=712)	4.09001	NA	NA
GTEX-13O3Q-0626-SM-5IJG1	Normal(n=712)	3.14045	NA	NA
GTEX-13O61-0226-SM-5KM52	Normal(n=712)	2.95736	NA	NA
GTEX-13OVG-0226-SM-5LU93	Normal(n=712)	3.54597	NA	NA
GTEX-13OVI-0826-SM-5KLZ8	Normal(n=712)	3.5097	NA	NA
GTEX-13OVJ-0626-SM-5J2O2	Normal(n=712)	3.09238	NA	NA
GTEX-13OVK-0226-SM-6M472	Normal(n=712)	3.55827	NA	NA
GTEX-13OW5-0626-SM-5J2N2	Normal(n=712)	3.65535	NA	NA
GTEX-13OW6-0726-SM-5L3FX	Normal(n=712)	3.81865	NA	NA
GTEX-13OW7-0826-SM-5L3EL	Normal(n=712)	3.47768	NA	NA
GTEX-13OW8-0126-SM-5IJE5	Normal(n=712)	3.34738	NA	NA
GTEX-13PDP-1026-SM-5L3FA	Normal(n=712)	4.55397	NA	NA
GTEX-13PL6-1026-SM-5L3E5	Normal(n=712)	3.55582	NA	NA
GTEX-13PVQ-0726-SM-5L3GI	Normal(n=712)	3.63807	NA	NA
GTEX-13PVR-0626-SM-5S2RC	Normal(n=712)	3.17425	NA	NA
GTEX-13QBU-0626-SM-5J2OG	Normal(n=712)	3.16334	NA	NA
GTEX-13QJ3-0926-SM-73KX5	Normal(n=712)	3.71039	NA	NA
GTEX-13QJC-0826-SM-5RQKC	Normal(n=712)	3.84097	NA	NA
GTEX-13RTJ-0326-SM-5YYAE	Normal(n=712)	3.61706	NA	NA
GTEX-13RTK-0326-SM-5RQHS	Normal(n=712)	3.3215	NA	NA
GTEX-13S86-1126-SM-5RQJX	Normal(n=712)	3.20664	NA	NA
GTEX-13U4I-0526-SM-5LU59	Normal(n=712)	3.66448	NA	NA
GTEX-13VXT-0626-SM-5SIA1	Normal(n=712)	3.52105	NA	NA
GTEX-13VXU-0826-SM-5KLZ2	Normal(n=712)	3.28954	NA	NA
GTEX-13W46-0926-SM-5LU3T	Normal(n=712)	4.05224	NA	NA
GTEX-13X6H-0526-SM-5LU4Q	Normal(n=712)	3.63575	NA	NA
GTEX-13X6J-0826-SM-5LU32	Normal(n=712)	3.38405	NA	NA
GTEX-13YAN-0926-SM-5O9C3	Normal(n=712)	3.84599	NA	NA
GTEX-144GL-1226-SM-5O9A4	Normal(n=712)	4.1127	NA	NA
GTEX-144GM-0226-SM-5Q5CB	Normal(n=712)	3.26828	NA	NA
GTEX-144GO-0126-SM-5LUAO	Normal(n=712)	3.46989	NA	NA
GTEX-145LT-0226-SM-5S2QK	Normal(n=712)	3.14519	NA	NA
GTEX-145LU-0426-SM-5O9AH	Normal(n=712)	3.72247	NA	NA
GTEX-145ME-0126-SM-5S2QM	Normal(n=712)	3.33113	NA	NA
GTEX-145MG-0826-SM-5Q5C2	Normal(n=712)	3.36289	NA	NA
GTEX-145MH-0426-SM-5LU8T	Normal(n=712)	3.54597	NA	NA
GTEX-145MI-1126-SM-5O9AK	Normal(n=712)	4.70432	NA	NA
GTEX-146FQ-0726-SM-5LUA7	Normal(n=712)	3.57773	NA	NA
GTEX-146FR-0326-SM-5SI8U	Normal(n=712)	3.35064	NA	NA
GTEX-14753-0926-SM-5Q5BI	Normal(n=712)	4.13504	NA	NA
GTEX-1477Z-0226-SM-5TDCI	Normal(n=712)	3.96255	NA	NA
GTEX-147F4-0826-SM-5QGRB	Normal(n=712)	3.69153	NA	NA
GTEX-147GR-0726-SM-5S2PL	Normal(n=712)	3.46467	NA	NA
GTEX-148VI-0526-SM-5TDDG	Normal(n=712)	3.63343	NA	NA
GTEX-148VJ-0726-SM-5LU8J	Normal(n=712)	3.91934	NA	NA
GTEX-1497J-0126-SM-5Q5BK	Normal(n=712)	3.38142	NA	NA
GTEX-14A5H-0726-SM-5Q5DW	Normal(n=712)	4.09001	NA	NA
GTEX-14A6H-2426-SM-5Q5BO	Normal(n=712)	3.65878	NA	NA
GTEX-14ABY-0926-SM-5Q5DY	Normal(n=712)	3.30728	NA	NA
GTEX-14AS3-0226-SM-5Q5B6	Normal(n=712)	3.7845	NA	NA
GTEX-14ASI-0726-SM-5Q5DC	Normal(n=712)	3.25957	NA	NA
GTEX-14B4R-0126-SM-5TDE4	Normal(n=712)	3.28451	NA	NA
GTEX-14BIN-0126-SM-5TDCG	Normal(n=712)	3.11636	NA	NA
GTEX-14BMU-0226-SM-5S2QA	Normal(n=712)	3.32984	NA	NA
GTEX-14BMV-0726-SM-73KVE	Normal(n=712)	3.32005	NA	NA
GTEX-14C38-0826-SM-5S2U8	Normal(n=712)	3.63575	NA	NA
GTEX-14C39-0226-SM-5TDDW	Normal(n=712)	3.46597	NA	NA
GTEX-14C5O-0826-SM-5TDEG	Normal(n=712)	4.10266	NA	NA
GTEX-14DAQ-0826-SM-73KWT	Normal(n=712)	3.75061	NA	NA
GTEX-14E6C-2626-SM-5RQJP	Normal(n=712)	3.69265	NA	NA
GTEX-14E6E-0326-SM-73KY6	Normal(n=712)	3.3051	NA	NA
GTEX-14E7W-0926-SM-5YYA4	Normal(n=712)	3.33971	NA	NA
GTEX-14ICK-1626-SM-6ETZX	Normal(n=712)	3.06126	NA	NA
GTEX-14ICL-0426-SM-5RQJ3	Normal(n=712)	3.56194	NA	NA
GTEX-14JG6-1326-SM-9OSXU	Normal(n=712)	3.11003	NA	NA
GTEX-14JIY-1226-SM-6871R	Normal(n=712)	3.34454	NA	NA
GTEX-14PHW-2926-SM-6AJBA	Normal(n=712)	3.51223	NA	NA
GTEX-14PII-0826-SM-6871S	Normal(n=712)	3.43536	NA	NA
GTEX-14PJ3-0126-SM-69LQP	Normal(n=712)	3.05554	NA	NA
GTEX-14PJ4-0326-SM-664OT	Normal(n=712)	3.4957	NA	NA
GTEX-14PJ6-0326-SM-6871H	Normal(n=712)	2.13652	NA	NA
GTEX-14PJM-1326-SM-664NX	Normal(n=712)	3.00522	NA	NA
GTEX-14PJO-0626-SM-6LLHH	Normal(n=712)	3.72356	NA	NA
GTEX-14PK6-0426-SM-6EU1J	Normal(n=712)	2.92771	NA	NA
GTEX-14PKU-0326-SM-6AJA7	Normal(n=712)	3.39575	NA	NA
GTEX-14PKV-0626-SM-6AJA2	Normal(n=712)	3.34412	NA	NA
GTEX-14PN3-0826-SM-69LOS	Normal(n=712)	3.26033	NA	NA
GTEX-14PN4-1526-SM-6871V	Normal(n=712)	4.05398	NA	NA
GTEX-14PQA-1226-SM-6M47A	Normal(n=712)	3.38778	NA	NA
GTEX-14XAO-0426-SM-6AJB6	Normal(n=712)	2.81352	NA	NA
GTEX-15CHC-0126-SM-5YYBA	Normal(n=712)	3.11936	NA	NA
GTEX-15CHQ-0826-SM-69LOT	Normal(n=712)	3.72137	NA	NA
GTEX-15CHR-1726-SM-7DUGW	Normal(n=712)	3.47119	NA	NA
GTEX-15D1Q-0626-SM-6AJAZ	Normal(n=712)	3.74953	NA	NA
GTEX-15DDE-0626-SM-69LOK	Normal(n=712)	4.7703	NA	NA
GTEX-15DZA-0226-SM-7KFS6	Normal(n=712)	3.19093	NA	NA
GTEX-15EO6-0126-SM-6LPKJ	Normal(n=712)	3.71039	NA	NA
GTEX-15ER7-0726-SM-7KUMF	Normal(n=712)	3.5741	NA	NA
GTEX-15ETS-0526-SM-6PAN3	Normal(n=712)	3.76871	NA	NA
GTEX-15EU6-1426-SM-6M48E	Normal(n=712)	3.28688	NA	NA
GTEX-15FZZ-0226-SM-6LLI4	Normal(n=712)	2.72836	NA	NA
GTEX-15G19-0626-SM-6M474	Normal(n=712)	3.72137	NA	NA
GTEX-15G1A-0326-SM-6M467	Normal(n=712)	3.08355	NA	NA
GTEX-15RIE-0426-SM-7KUMH	Normal(n=712)	3.60288	NA	NA
GTEX-15RIF-0326-SM-7KUFR	Normal(n=712)	1.37351	NA	NA
GTEX-15RJ7-0326-SM-6M47H	Normal(n=712)	3.07707	NA	NA
GTEX-15RJE-1326-SM-6LPI6	Normal(n=712)	3.47249	NA	NA
GTEX-15SB6-1526-SM-7KUMQ	Normal(n=712)	3.26439	NA	NA
GTEX-15SHU-0726-SM-7KUFI	Normal(n=712)	3.49825	NA	NA
GTEX-15SHV-0426-SM-6M476	Normal(n=712)	3.39739	NA	NA
GTEX-15UF6-1126-SM-6LPJ3	Normal(n=712)	3.49697	NA	NA
GTEX-169BO-0326-SM-7EPIM	Normal(n=712)	3.42479	NA	NA
GTEX-16AAH-0326-SM-7DHML	Normal(n=712)	2.99801	NA	NA
GTEX-16BQI-0726-SM-6LPJZ	Normal(n=712)	3.56925	NA	NA
GTEX-16GPK-0926-SM-6LPJ9	Normal(n=712)	3.35966	NA	NA
GTEX-16MT8-0626-SM-6M47Q	Normal(n=712)	3.55827	NA	NA
GTEX-16MTA-0726-SM-7KUL4	Normal(n=712)	3.64386	NA	NA
GTEX-16NGA-0326-SM-718AJ	Normal(n=712)	3.41129	NA	NA
GTEX-16NPX-1426-SM-6LPK3	Normal(n=712)	3.49185	NA	NA
GTEX-16XZY-0726-SM-79OMU	Normal(n=712)	2.96901	NA	NA
GTEX-16XZZ-0826-SM-7IGM3	Normal(n=712)	3.56071	NA	NA
GTEX-16YQH-0326-SM-6LPJV	Normal(n=712)	3.69042	NA	NA
GTEX-16Z82-0426-SM-7EPGX	Normal(n=712)	3.96347	NA	NA
GTEX-178AV-0726-SM-6LPJI	Normal(n=712)	3.44361	NA	NA
GTEX-17EVP-0126-SM-7EPHW	Normal(n=712)	3.55827	NA	NA
GTEX-17EVQ-0526-SM-7KFSK	Normal(n=712)	4.12598	NA	NA
GTEX-17F96-0526-SM-79OLE	Normal(n=712)	4.04264	NA	NA
GTEX-17F97-0626-SM-7IGOH	Normal(n=712)	4.53169	NA	NA
GTEX-17F9E-0626-SM-79ON5	Normal(n=712)	3.47508	NA	NA
GTEX-17F9Y-0526-SM-7EWDC	Normal(n=712)	4.34483	NA	NA
GTEX-17GQL-0226-SM-7LTAK	Normal(n=712)	3.1398	NA	NA
GTEX-17HG3-0226-SM-7EWEA	Normal(n=712)	3.48414	NA	NA
GTEX-17HGU-0826-SM-7EWE5	Normal(n=712)	3.74416	NA	NA
GTEX-17HHE-0426-SM-79OK3	Normal(n=712)	3.49442	NA	NA
GTEX-17HHY-0826-SM-7EPID	Normal(n=712)	3.20633	NA	NA
GTEX-17HII-1926-SM-79OLB	Normal(n=712)	4.16027	NA	NA
GTEX-17JCI-0626-SM-7IGM7	Normal(n=712)	3.22419	NA	NA
GTEX-17KNJ-1026-SM-79ONK	Normal(n=712)	3.24413	NA	NA
GTEX-17MF6-0626-SM-7LT8D	Normal(n=712)	3.73552	NA	NA
GTEX-183FY-0626-SM-79OKR	Normal(n=712)	3.76765	NA	NA
GTEX-183WM-2626-SM-7KFRY	Normal(n=712)	3.37058	NA	NA
GTEX-18465-1426-SM-7KFTF	Normal(n=712)	3.48929	NA	NA
GTEX-18A66-0826-SM-72D5Z	Normal(n=712)	3.5373	NA	NA
GTEX-18A67-0826-SM-7KFTI	Normal(n=712)	3.08848	NA	NA
GTEX-18A6Q-0726-SM-7LT8Y	Normal(n=712)	3.29381	NA	NA
GTEX-18A7A-0826-SM-7KFTJ	Normal(n=712)	3.61353	NA	NA
GTEX-18D9A-0126-SM-7KFSI	Normal(n=712)	3.53481	NA	NA
GTEX-18D9B-0726-SM-72D6K	Normal(n=712)	2.8514	NA	NA
GTEX-18D9U-1026-SM-72D5R	Normal(n=712)	3.43082	NA	NA
GTEX-18QFQ-0726-SM-7LG6D	Normal(n=712)	3.51349	NA	NA
GTEX-1A3MV-0326-SM-73KW7	Normal(n=712)	3.24489	NA	NA
GTEX-1A8FM-0726-SM-7DUGK	Normal(n=712)	3.55213	NA	NA
GTEX-1A8G6-0626-SM-7IGNB	Normal(n=712)	3.51223	NA	NA
GTEX-1A8G7-1026-SM-73KVA	Normal(n=712)	3.74093	NA	NA
GTEX-1AMEY-0126-SM-73KTX	Normal(n=712)	3.14388	NA	NA
GTEX-1AMFI-0526-SM-7189M	Normal(n=712)	3.36527	NA	NA
GTEX-1AX8Z-0826-SM-7DUFZ	Normal(n=712)	3.67129	NA	NA
GTEX-1AX9I-0626-SM-72D54	Normal(n=712)	3.58135	NA	NA
GTEX-1AX9J-2126-SM-731DD	Normal(n=712)	3.32495	NA	NA
GTEX-1AX9K-0626-SM-73KVD	Normal(n=712)	3.46336	NA	NA
GTEX-1AYCT-0226-SM-73KVB	Normal(n=712)	3.32812	NA	NA
GTEX-1B8KE-0626-SM-7189H	Normal(n=712)	3.32783	NA	NA
GTEX-1B8KZ-0426-SM-731DP	Normal(n=712)	3.31513	NA	NA
GTEX-1B8L1-1626-SM-7IGMH	Normal(n=712)	3.60051	NA	NA
GTEX-1B8SF-0626-SM-73KVV	Normal(n=712)	3.93263	NA	NA
GTEX-1B8SG-1126-SM-7IGMT	Normal(n=712)	3.07536	NA	NA
GTEX-1B932-0926-SM-73KUP	Normal(n=712)	3.61589	NA	NA
GTEX-1B933-1026-SM-7P8RO	Normal(n=712)	3.53978	NA	NA
GTEX-1B97I-0326-SM-7DUGB	Normal(n=712)	3.52105	NA	NA
GTEX-1B97J-0626-SM-7P8RU	Normal(n=712)	3.32611	NA	NA
GTEX-1BAJH-0926-SM-79OO6	Normal(n=712)	3.58015	NA	NA
GTEX-1C2JI-0326-SM-7EWFD	Normal(n=712)	2.90689	NA	NA
GTEX-1C475-0226-SM-7MGXM	Normal(n=712)	2.65947	NA	NA
GTEX-1C4CL-0726-SM-7IGP9	Normal(n=712)	3.33314	NA	NA
GTEX-1C64N-1026-SM-79ONM	Normal(n=712)	3.51979	NA	NA
GTEX-1C6VQ-0526-SM-7MGWD	Normal(n=712)	3.27367	NA	NA
GTEX-1C6VR-0426-SM-7IGN6	Normal(n=712)	4.10266	NA	NA
GTEX-1C6VS-0826-SM-7EWEI	Normal(n=712)	3.69042	NA	NA
GTEX-1CAMQ-1126-SM-7EWFE	Normal(n=712)	3.86096	NA	NA
GTEX-1CAMR-0226-SM-7DUGO	Normal(n=712)	3.17584	NA	NA
GTEX-1CAMS-0826-SM-7P8P1	Normal(n=712)	3.27023	NA	NA
GTEX-1CB4E-0326-SM-7MXT3	Normal(n=712)	2.77568	NA	NA
GTEX-1CB4F-0826-SM-793CV	Normal(n=712)	3.414	NA	NA
GTEX-1CB4G-1526-SM-7P8QG	Normal(n=712)	3.10333	NA	NA
GTEX-1CB4H-0126-SM-7IGN2	Normal(n=712)	3.65191	NA	NA
GTEX-1CB4I-0726-SM-7DUGS	Normal(n=712)	3.39657	NA	NA
GTEX-1CB4J-1426-SM-7MKFR	Normal(n=712)	3.33543	NA	NA
GTEX-1E1VI-0726-SM-7P8QJ	Normal(n=712)	3.89433	NA	NA
GTEX-1EH9U-0926-SM-7EWF1	Normal(n=712)	3.853	NA	NA
GTEX-1EKGG-0726-SM-7IGPX	Normal(n=712)	3.4117	NA	NA
GTEX-1EMGI-0826-SM-7EPHY	Normal(n=712)	3.61706	NA	NA
GTEX-1EN7A-1026-SM-7IGPZ	Normal(n=712)	3.65878	NA	NA
GTEX-1EU9M-0626-SM-7MXUT	Normal(n=712)	3.53107	NA	NA
GTEX-1EWIQ-0826-SM-7MXTH	Normal(n=712)	3.45575	NA	NA
GTEX-1EX96-0126-SM-9KNVH	Normal(n=712)	3.82477	NA	NA
GTEX-1F48J-0926-SM-7P8PZ	Normal(n=712)	3.6241	NA	NA
GTEX-1F52S-0526-SM-7P8TP	Normal(n=712)	3.70377	NA	NA
GTEX-1F5PL-0826-SM-7MXU7	Normal(n=712)	3.12631	NA	NA
GTEX-1F6IF-1126-SM-9KNV2	Normal(n=712)	3.70377	NA	NA
GTEX-1F75A-0326-SM-7MXTR	Normal(n=712)	3.09271	NA	NA
GTEX-1F75B-0826-SM-9QEIT	Normal(n=712)	3.66562	NA	NA
GTEX-1F75I-0926-SM-7MXUU	Normal(n=712)	3.27292	NA	NA
GTEX-1F88F-0726-SM-7P8R7	Normal(n=712)	3.2762	NA	NA
GTEX-1FIGZ-0226-SM-7P8QR	Normal(n=712)	3.40013	NA	NA
GTEX-1GF9U-0226-SM-7P8TY	Normal(n=712)	3.43883	NA	NA
GTEX-1GF9V-0926-SM-9KNW7	Normal(n=712)	3.82579	NA	NA
GTEX-1GF9W-0626-SM-7MXVJ	Normal(n=712)	3.56194	NA	NA
GTEX-1GF9X-0126-SM-A9G38	Normal(n=712)	3.70487	NA	NA
GTEX-1GL5R-0626-SM-7PBZY	Normal(n=712)	3.67807	NA	NA
GTEX-1GMR3-0726-SM-9WPOF	Normal(n=712)	3.774	NA	NA
GTEX-1GMR8-0826-SM-9KNUR	Normal(n=712)	4.07895	NA	NA
GTEX-1GMRU-1126-SM-9KNV1	Normal(n=712)	3.53232	NA	NA
GTEX-1GN1U-0826-SM-9WPPX	Normal(n=712)	3.904	NA	NA
GTEX-1GN1V-0626-SM-7P8QU	Normal(n=712)	3.48414	NA	NA
GTEX-1GN1W-0126-SM-7MXV7	Normal(n=712)	3.13373	NA	NA
GTEX-1GN2E-0826-SM-9WYT8	Normal(n=712)	3.83996	NA	NA
GTEX-1GN73-0826-SM-9OSW4	Normal(n=712)	3.57289	NA	NA
GTEX-1GPI7-0726-SM-9WG84	Normal(n=712)	3.65764	NA	NA
GTEX-1GTWX-0726-SM-9WPPA	Normal(n=712)	3.58976	NA	NA
GTEX-1GZ2Q-0826-SM-7P8TK	Normal(n=712)	3.848	NA	NA
GTEX-1GZ4H-0226-SM-9JGGJ	Normal(n=712)	1.89064	NA	NA
GTEX-1GZ4I-0626-SM-9WPPN	Normal(n=712)	3.48156	NA	NA
GTEX-1GZHY-1426-SM-9WG5H	Normal(n=712)	3.43523	NA	NA
GTEX-1H11D-0626-SM-9WPQ1	Normal(n=712)	3.62761	NA	NA
GTEX-1H1CY-0726-SM-9OSXX	Normal(n=712)	3.06987	NA	NA
GTEX-1H1DE-0226-SM-ARZN8	Normal(n=712)	3.77083	NA	NA
GTEX-1H1DF-1026-SM-9QEJ1	Normal(n=712)	3.64616	NA	NA
GTEX-1H1DG-0726-SM-A96TN	Normal(n=712)	3.45418	NA	NA
GTEX-1H1E6-0326-SM-9OSWE	Normal(n=712)	3.38998	NA	NA
GTEX-1H1ZS-0726-SM-A9G3K	Normal(n=712)	3.73444	NA	NA
GTEX-1H2FU-0626-SM-9WPPS	Normal(n=712)	3.7126	NA	NA
GTEX-1H3VE-0826-SM-9KNVQ	Normal(n=712)	3.87774	NA	NA
GTEX-1HB9E-0826-SM-CNNQJ	Normal(n=712)	3.80012	NA	NA
GTEX-1HBPH-0926-SM-A9SME	Normal(n=712)	3.76341	NA	NA
GTEX-1HBPI-0826-SM-9WYTX	Normal(n=712)	3.4526	NA	NA
GTEX-1HBPM-0926-SM-ARL9C	Normal(n=712)	3.62293	NA	NA
GTEX-1HBPN-1226-SM-B2LW9	Normal(n=712)	3.20633	NA	NA
GTEX-1HC8U-1226-SM-9WYUW	Normal(n=712)	3.16398	NA	NA
GTEX-1HCU7-0826-SM-B2LX7	Normal(n=712)	3.97453	NA	NA
GTEX-1HCU9-0226-SM-9WPNT	Normal(n=712)	3.2857	NA	NA
GTEX-1HCUA-0126-SM-B2LWC	Normal(n=712)	3.43989	NA	NA
GTEX-1HCVE-0726-SM-A96SH	Normal(n=712)	3.76977	NA	NA
GTEX-1HFI6-1326-SM-A9SL8	Normal(n=712)	3.94298	NA	NA
GTEX-1HFI7-0326-SM-9WPOX	Normal(n=712)	3.40545	NA	NA
GTEX-1HGF4-0726-SM-9WYU9	Normal(n=712)	3.37295	NA	NA
GTEX-1HKZK-0826-SM-A9G2C	Normal(n=712)	3.52356	NA	NA
GTEX-1HR98-0326-SM-CGQEL	Normal(n=712)	3.41156	NA	NA
GTEX-1HR9M-0626-SM-A96S6	Normal(n=712)	3.78764	NA	NA
GTEX-1HSEH-0826-SM-B2LXE	Normal(n=712)	3.5008	NA	NA
GTEX-1HSGN-0726-SM-A9G2F	Normal(n=712)	3.18365	NA	NA
GTEX-1HSKV-1026-SM-B2LWK	Normal(n=712)	3.43816	NA	NA
GTEX-1HSMO-0726-SM-A96TM	Normal(n=712)	4.17951	NA	NA
GTEX-1HSMQ-0526-SM-A96TY	Normal(n=712)	3.22697	NA	NA
GTEX-1HT8W-1526-SM-CE6S3	Normal(n=712)	3.59096	NA	NA
GTEX-1HUB1-1226-SM-B2LWX	Normal(n=712)	3.87676	NA	NA
GTEX-1I19N-0226-SM-CE6ST	Normal(n=712)	3.4448	NA	NA
GTEX-1I1GP-0326-SM-CNPQ4	Normal(n=712)	3.30889	NA	NA
GTEX-1I1GQ-0826-SM-CNNQR	Normal(n=712)	3.01881	NA	NA
GTEX-1I1GR-1126-SM-A9G2I	Normal(n=712)	3.62994	NA	NA
GTEX-1I1GS-0726-SM-C1YS7	Normal(n=712)	3.62644	NA	NA
GTEX-1I1GT-0826-SM-B2LWO	Normal(n=712)	3.23894	NA	NA
GTEX-1I1GU-0826-SM-ARZM5	Normal(n=712)	3.49185	NA	NA
GTEX-1I1GV-0726-SM-ARZLY	Normal(n=712)	3.73877	NA	NA
GTEX-1I6K6-0726-SM-B2LX4	Normal(n=712)	3.36387	NA	NA
GTEX-1I6K7-1126-SM-A96SW	Normal(n=712)	3.43883	NA	NA
GTEX-1ICG6-0426-SM-ARU7M	Normal(n=712)	3.14828	NA	NA
GTEX-1ICLY-0726-SM-A96TB	Normal(n=712)	3.53356	NA	NA
GTEX-1ICLZ-0526-SM-ARZM8	Normal(n=712)	3.59813	NA	NA
GTEX-1IDJC-1026-SM-A96T2	Normal(n=712)	3.43869	NA	NA
GTEX-1IDJH-0826-SM-CE6SY	Normal(n=712)	3.51223	NA	NA
GTEX-1IDJU-1626-SM-CJI4B	Normal(n=712)	3.23358	NA	NA
GTEX-1IE54-0926-SM-A9G2Y	Normal(n=712)	4.0036	NA	NA
GTEX-1IGQW-0626-SM-C1YR9	Normal(n=712)	3.24641	NA	NA
GTEX-1IKJJ-1026-SM-A96SQ	Normal(n=712)	3.33771	NA	NA
GTEX-1IKOE-0926-SM-ARU7X	Normal(n=712)	3.67469	NA	NA
GTEX-1IKOH-0626-SM-CJI35	Normal(n=712)	3.04299	NA	NA
GTEX-1IL2U-0826-SM-CL53Q	Normal(n=712)	3.93168	NA	NA
GTEX-1IL2V-0626-SM-ARU7S	Normal(n=712)	4.09424	NA	NA
GTEX-1IOXB-1026-SM-CJI4D	Normal(n=712)	2.92372	NA	NA
GTEX-1IY9M-1026-SM-A96TG	Normal(n=712)	3.01006	NA	NA
GTEX-1J1OQ-0526-SM-A9G2P	Normal(n=712)	3.71809	NA	NA
GTEX-1J1R8-0126-SM-CJI36	Normal(n=712)	3.32668	NA	NA
GTEX-1J8EW-1126-SM-A96T8	Normal(n=712)	3.70598	NA	NA
GTEX-1J8JJ-0726-SM-AHZ3E	Normal(n=712)	3.78031	NA	NA
GTEX-1J8Q3-0226-SM-C1YR4	Normal(n=712)	3.40993	NA	NA
GTEX-1J8QM-0726-SM-CE6RF	Normal(n=712)	3.0156	NA	NA
GTEX-1JJ6O-0626-SM-AHZ3H	Normal(n=712)	3.18555	NA	NA
GTEX-1JJE9-0226-SM-CY8HU	Normal(n=712)	3.91839	NA	NA
GTEX-1JJEA-0626-SM-D3L96	Normal(n=712)	3.5097	NA	NA
GTEX-1JK1U-0326-SM-CXZJH	Normal(n=712)	3.09491	NA	NA
GTEX-1JKYN-1126-SM-CGQG5	Normal(n=712)	3.44784	NA	NA
GTEX-1JKYR-0826-SM-ARU8L	Normal(n=712)	3.46074	NA	NA
GTEX-1JMLX-0826-SM-CNNPP	Normal(n=712)	3.70708	NA	NA
GTEX-1JMPY-0126-SM-CJI39	Normal(n=712)	3.21366	NA	NA
GTEX-1JMPZ-0626-SM-CY8HY	Normal(n=712)	3.97269	NA	NA
GTEX-1JMQJ-2026-SM-CNPP9	Normal(n=712)	3.94298	NA	NA
GTEX-1JMQK-2126-SM-CY8I2	Normal(n=712)	3.80116	NA	NA
GTEX-1JMQL-0926-SM-CJI3F	Normal(n=712)	3.29528	NA	NA
GTEX-1JN6P-0626-SM-ARZN6	Normal(n=712)	3.65306	NA	NA
GTEX-1K2DA-1526-SM-CGQGQ	Normal(n=712)	3.47119	NA	NA
GTEX-1K2DU-0126-SM-E9TIU	Normal(n=712)	2.9813	NA	NA
GTEX-1K9T9-0826-SM-EAZ4X	Normal(n=712)	3.35276	NA	NA
GTEX-1KAFJ-0426-SM-DHXJH	Normal(n=712)	3.33857	NA	NA
GTEX-1KANC-0826-SM-D3LA8	Normal(n=712)	3.17105	NA	NA
GTEX-1KD4Q-1026-SM-CXZKJ	Normal(n=712)	3.46597	NA	NA
GTEX-1KD5A-0426-SM-D4P3X	Normal(n=712)	3.51602	NA	NA
GTEX-1KXAM-1726-SM-D3LAE	Normal(n=712)	3.35797	NA	NA
GTEX-1LB8K-0626-SM-D4P3Z	Normal(n=712)	4.30451	NA	NA
GTEX-1LBAC-0726-SM-D3L9U	Normal(n=712)	3.57652	NA	NA
GTEX-1LG7Y-0626-SM-DHXJM	Normal(n=712)	2.99783	NA	NA
GTEX-1LG7Z-0526-SM-D4P3Q	Normal(n=712)	3.53232	NA	NA
GTEX-1LGOU-0126-SM-EV79W	Normal(n=712)	3.64731	NA	NA
GTEX-1LGRB-1226-SM-CNNPS	Normal(n=712)	3.23588	NA	NA
GTEX-1LH75-0626-SM-DIPG3	Normal(n=712)	3.52857	NA	NA
GTEX-1LSVX-0726-SM-E9TJG	Normal(n=712)	3.62527	NA	NA
GTEX-1LVAM-0826-SM-EV79X	Normal(n=712)	2.99114	NA	NA
GTEX-1LVAN-0726-SM-CNNPF	Normal(n=712)	2.89472	NA	NA
GTEX-1M4P7-0626-SM-EVR51	Normal(n=712)	3.94673	NA	NA
GTEX-1MA7X-0926-SM-DIPEJ	Normal(n=712)	3.61706	NA	NA
GTEX-1MCC2-0526-SM-DHXJS	Normal(n=712)	3.01471	NA	NA
GTEX-1MGNQ-0726-SM-DPRYH	Normal(n=712)	3.24945	NA	NA
GTEX-1MJK2-0826-SM-DTXE8	Normal(n=712)	2.64432	NA	NA
GTEX-1MJK3-0326-SM-DTX96	Normal(n=712)	3.06229	NA	NA
GTEX-1MUQO-0726-SM-E9TJM	Normal(n=712)	3.02698	NA	NA
GTEX-1N5O9-1026-SM-DTX8Y	Normal(n=712)	3.23235	NA	NA
GTEX-1NUQO-0926-SM-DTXEX	Normal(n=712)	3.39479	NA	NA
GTEX-1NV5F-0726-SM-DTXEH	Normal(n=712)	3.16398	NA	NA
GTEX-1O97I-1026-SM-E76PI	Normal(n=712)	3.94111	NA	NA
GTEX-1O9I2-1226-SM-E6CQC	Normal(n=712)	4.0063	NA	NA
GTEX-1OFPY-1526-SM-DTX8R	Normal(n=712)	2.95531	NA	NA
GTEX-1OJC3-0626-SM-E8VMO	Normal(n=712)	3.23358	NA	NA
GTEX-1OJC4-0526-SM-E6CQV	Normal(n=712)	2.94242	NA	NA
GTEX-1P4AB-1126-SM-DTX94	Normal(n=712)	3.68706	NA	NA
GTEX-1PBJI-0726-SM-EXUSQ	Normal(n=712)	3.34866	NA	NA
GTEX-1PBJJ-1926-SM-DTX8T	Normal(n=712)	3.47508	NA	NA
GTEX-1PDJ9-0826-SM-E76PS	Normal(n=712)	3.5373	NA	NA
GTEX-1PFEY-0226-SM-EVR3M	Normal(n=712)	3.46597	NA	NA
GTEX-1PIGE-0726-SM-DPRZD	Normal(n=712)	3.43029	NA	NA
GTEX-1PIIG-2026-SM-EVR43	Normal(n=712)	3.74524	NA	NA
GTEX-1PPGY-1426-SM-EVR3R	Normal(n=712)	3.22389	NA	NA
GTEX-1PPH8-0926-SM-DTX9U	Normal(n=712)	3.5373	NA	NA
GTEX-1PWST-0726-SM-EWRMO	Normal(n=712)	3.67582	NA	NA
GTEX-1QAET-0226-SM-EVR3T	Normal(n=712)	3.59694	NA	NA
GTEX-1QCLY-0826-SM-DTX8A	Normal(n=712)	3.18428	NA	NA
GTEX-1QCLZ-0626-SM-E6CR2	Normal(n=712)	3.419	NA	NA
GTEX-1QEPI-0726-SM-E76QG	Normal(n=712)	3.38571	NA	NA
GTEX-1QMI2-0826-SM-EXUT4	Normal(n=712)	3.35572	NA	NA
GTEX-1QP28-0626-SM-E76P5	Normal(n=712)	3.00198	NA	NA
GTEX-1QP2A-0626-SM-DTX9C	Normal(n=712)	3.36877	NA	NA
GTEX-1QP66-0326-SM-DTX7V	Normal(n=712)	3.57531	NA	NA
GTEX-1QP67-0326-SM-EVR45	Normal(n=712)	3.23787	NA	NA
GTEX-1QP6S-2526-SM-DTX9Z	Normal(n=712)	3.90207	NA	NA
GTEX-1QP9N-0126-SM-DPRZS	Normal(n=712)	3.41468	NA	NA
GTEX-1QPFJ-0626-SM-DTX7Y	Normal(n=712)	3.8125	NA	NA
GTEX-1QW4Y-0226-SM-EAZ3U	Normal(n=712)	3.02928	NA	NA
GTEX-1R46S-0426-SM-EVR48	Normal(n=712)	3.61117	NA	NA
GTEX-1R9JW-0226-SM-EVR4K	Normal(n=712)	3.84097	NA	NA
GTEX-1R9K4-0726-SM-EWRN2	Normal(n=712)	4.30743	NA	NA
GTEX-1R9K5-0726-SM-EAZ4E	Normal(n=712)	3.61589	NA	NA
GTEX-1R9PM-0226-SM-DPRY7	Normal(n=712)	3.71809	NA	NA
GTEX-1RAZA-0826-SM-EAZ4I	Normal(n=712)	3.01899	NA	NA
GTEX-1RAZQ-0926-SM-EAZ4Q	Normal(n=712)	3.28688	NA	NA
GTEX-1RAZR-1126-SM-E6CRC	Normal(n=712)	3.68257	NA	NA
GTEX-1RAZS-1026-SM-E9TID	Normal(n=712)	3.39575	NA	NA
GTEX-1RDX4-0926-SM-E9U6D	Normal(n=712)	3.72574	NA	NA
GTEX-1RMOY-0126-SM-EWRNN	Normal(n=712)	3.76977	NA	NA
GTEX-1RNSC-1126-SM-E9TIP	Normal(n=712)	3.30553	NA	NA
GTEX-1RQEC-1026-SM-EVR5B	Normal(n=712)	3.74953	NA	NA
GTEX-1RQED-0926-SM-EWRNZ	Normal(n=712)	3.28155	NA	NA
GTEX-1S5ZU-0726-SM-EWROH	Normal(n=712)	4.29131	NA	NA
GTEX-1S83E-0726-SM-EV7B6	Normal(n=712)	3.07399	NA	NA
GTEX-N7MS-2326-SM-2HMLD	Normal(n=712)	3.22897	NA	NA
GTEX-NFK9-0726-SM-2HMJW	Normal(n=712)	3.22913	NA	NA
GTEX-O5YV-1526-SM-EV799	Normal(n=712)	3.98094	NA	NA
GTEX-OHPK-2626-SM-2HMK9	Normal(n=712)	3.30012	NA	NA
GTEX-OHPL-2626-SM-2HMJA	Normal(n=712)	2.76744	NA	NA
GTEX-OHPM-2626-SM-33HC5	Normal(n=712)	3.31499	NA	NA
GTEX-OIZF-2626-SM-7P8QZ	Normal(n=712)	2.99494	NA	NA
GTEX-OIZG-0226-SM-2TC5L	Normal(n=712)	3.05363	NA	NA
GTEX-OIZI-0726-SM-2XCEI	Normal(n=712)	3.39479	NA	NA
GTEX-OOBJ-2626-SM-2I3F6	Normal(n=712)	3.33914	NA	NA
GTEX-OXRK-0626-SM-2HMJ5	Normal(n=712)	3.32797	NA	NA
GTEX-OXRL-2626-SM-2I3F1	Normal(n=712)	3.00558	NA	NA
GTEX-OXRN-1526-SM-E6CHM	Normal(n=712)	4.09592	NA	NA
GTEX-OXRO-1226-SM-48TDL	Normal(n=712)	4.61294	NA	NA
GTEX-OXRP-0326-SM-33HBJ	Normal(n=712)	3.75596	NA	NA
GTEX-P44G-0626-SM-2I5EO	Normal(n=712)	3.03668	NA	NA
GTEX-P4PQ-2626-SM-33HC9	Normal(n=712)	3.15267	NA	NA
GTEX-P4QS-2626-SM-2I3EV	Normal(n=712)	3.11303	NA	NA
GTEX-P4QT-2626-SM-2I3FM	Normal(n=712)	3.08882	NA	NA
GTEX-P78B-0526-SM-2I5F7	Normal(n=712)	3.26559	NA	NA
GTEX-PLZ4-1226-SM-2I5FE	Normal(n=712)	4.16511	NA	NA
GTEX-POYW-0826-SM-2XCEM	Normal(n=712)	4.4121	NA	NA
GTEX-PWCY-2326-SM-2I3EQ	Normal(n=712)	3.30407	NA	NA
GTEX-PWN1-2626-SM-2I3FH	Normal(n=712)	3.39122	NA	NA
GTEX-PX3G-2626-SM-2I3EG	Normal(n=712)	3.53481	NA	NA
GTEX-Q2AG-0826-SM-2HMKF	Normal(n=712)	3.66903	NA	NA
GTEX-Q2AH-0726-SM-2I3EA	Normal(n=712)	3.05137	NA	NA
GTEX-Q2AI-0326-SM-2I3EK	Normal(n=712)	3.26288	NA	NA
GTEX-Q734-0526-SM-2I3EH	Normal(n=712)	3.94953	NA	NA
GTEX-QDT8-1226-SM-EVR35	Normal(n=712)	4.19613	NA	NA
GTEX-QDVJ-0226-SM-2I5FV	Normal(n=712)	3.28599	NA	NA
GTEX-QDVN-0626-SM-2I3FP	Normal(n=712)	3.29924	NA	NA
GTEX-QEG5-0826-SM-2I5GF	Normal(n=712)	3.4363	NA	NA
GTEX-QEL4-0726-SM-3GIJ5	Normal(n=712)	3.51728	NA	NA
GTEX-QLQ7-0726-SM-2I5G2	Normal(n=712)	3.26709	NA	NA
GTEX-QV31-0726-SM-3GAEG	Normal(n=712)	2.89064	NA	NA
GTEX-QV44-0826-SM-2S1RG	Normal(n=712)	3.82375	NA	NA
GTEX-QXCU-0326-SM-2TC63	Normal(n=712)	3.83086	NA	NA
GTEX-R3RS-0726-SM-3GIJR	Normal(n=712)	3.52482	NA	NA
GTEX-R53T-0526-SM-3GADL	Normal(n=712)	3.97545	NA	NA
GTEX-R55C-0626-SM-2TF4Q	Normal(n=712)	3.47119	NA	NA
GTEX-R55E-0826-SM-2TC5M	Normal(n=712)	3.38405	NA	NA
GTEX-R55G-0726-SM-2TC6J	Normal(n=712)	3.48156	NA	NA
GTEX-REY6-0526-SM-2TF5M	Normal(n=712)	3.93734	NA	NA
GTEX-RM2N-0526-SM-2TF4N	Normal(n=712)	3.58856	NA	NA
GTEX-RN5K-2826-SM-EZ6L3	Normal(n=712)	3.78136	NA	NA
GTEX-RN64-0626-SM-2TC5V	Normal(n=712)	3.2549	NA	NA
GTEX-RNOR-0926-SM-2TF56	Normal(n=712)	3.36373	NA	NA
GTEX-RTLS-0626-SM-5SI7Z	Normal(n=712)	3.47897	NA	NA
GTEX-RU1J-0226-SM-2TF5Y	Normal(n=712)	3.27083	NA	NA
GTEX-RU72-0126-SM-2TF6Z	Normal(n=712)	3.87971	NA	NA
GTEX-RUSQ-1026-SM-2TF6V	Normal(n=712)	3.20977	NA	NA
GTEX-RVPV-1226-SM-2TF73	Normal(n=712)	2.65329	NA	NA
GTEX-RWS6-0626-SM-2XCAS	Normal(n=712)	3.44175	NA	NA
GTEX-RWSA-0826-SM-2XCBF	Normal(n=712)	3.54226	NA	NA
GTEX-S32W-0726-SM-2XCBL	Normal(n=712)	3.41603	NA	NA
GTEX-S341-0226-SM-D4P1Y	Normal(n=712)	3.41576	NA	NA
GTEX-S7SE-0726-SM-2XCD7	Normal(n=712)	3.49442	NA	NA
GTEX-S7SF-0226-SM-5SI7H	Normal(n=712)	3.40449	NA	NA
GTEX-SE5C-0726-SM-4BRWY	Normal(n=712)	3.31339	NA	NA
GTEX-SIU8-0626-SM-2XCDN	Normal(n=712)	3.83794	NA	NA
GTEX-SJXC-0726-SM-2XCFJ	Normal(n=712)	3.52356	NA	NA
GTEX-SN8G-1526-SM-4DM79	Normal(n=712)	3.81762	NA	NA
GTEX-SNOS-0226-SM-32PLR	Normal(n=712)	3.18729	NA	NA
GTEX-SUCS-0226-SM-32PLQ	Normal(n=712)	3.40013	NA	NA
GTEX-T2IS-0626-SM-32QP6	Normal(n=712)	3.30056	NA	NA
GTEX-T5JW-1226-SM-3GACY	Normal(n=712)	3.80839	NA	NA
GTEX-T6MN-0626-SM-32PM9	Normal(n=712)	4.02414	NA	NA
GTEX-T6MO-0226-SM-32QOL	Normal(n=712)	3.36499	NA	NA
GTEX-T8EM-0226-SM-3DB7C	Normal(n=712)	3.47119	NA	NA
GTEX-TKQ1-0126-SM-33HB3	Normal(n=712)	3.33571	NA	NA
GTEX-TMMY-0826-SM-33HB9	Normal(n=712)	3.12201	NA	NA
GTEX-TSE9-0626-SM-3DB8B	Normal(n=712)	4.22419	NA	NA
GTEX-U3ZH-0226-SM-3DB7B	Normal(n=712)	2.90111	NA	NA
GTEX-U3ZM-0126-SM-3DB8M	Normal(n=712)	3.46858	NA	NA
GTEX-U3ZN-0326-SM-3DB86	Normal(n=712)	3.99458	NA	NA
GTEX-U412-0726-SM-EVR2Y	Normal(n=712)	3.31644	NA	NA
GTEX-U4B1-0626-SM-3DB8L	Normal(n=712)	3.66789	NA	NA
GTEX-U8T8-2326-SM-3DB96	Normal(n=712)	3.5656	NA	NA
GTEX-UJMC-0326-SM-3GAE2	Normal(n=712)	3.61235	NA	NA
GTEX-V1D1-0926-SM-4JBHQ	Normal(n=712)	3.41886	NA	NA
GTEX-V955-0426-SM-3GAEL	Normal(n=712)	3.51096	NA	NA
GTEX-VJYA-0426-SM-3GIJK	Normal(n=712)	3.3099	NA	NA
GTEX-VUSG-0426-SM-3GIKD	Normal(n=712)	3.82273	NA	NA
GTEX-W5WG-1426-SM-4KKZP	Normal(n=712)	3.08491	NA	NA
GTEX-W5X1-0426-SM-3GILB	Normal(n=712)	3.40898	NA	NA
GTEX-WEY5-0526-SM-3GIKZ	Normal(n=712)	3.43429	NA	NA
GTEX-WFG7-0326-SM-DKPO8	Normal(n=712)	3.18507	NA	NA
GTEX-WFG8-0426-SM-3GILD	Normal(n=712)	3.04422	NA	NA
GTEX-WFJO-0226-SM-3GIKW	Normal(n=712)	3.40122	NA	NA
GTEX-WH7G-0526-SM-3NMBI	Normal(n=712)	3.22435	NA	NA
GTEX-WHPG-0226-SM-3NMB9	Normal(n=712)	3.37476	NA	NA
GTEX-WHSB-1626-SM-3LK6J	Normal(n=712)	3.36345	NA	NA
GTEX-WHSE-0626-SM-4RGNF	Normal(n=712)	3.64616	NA	NA
GTEX-WK11-0926-SM-3NMAU	Normal(n=712)	3.35502	NA	NA
GTEX-WL46-0126-SM-3TW8I	Normal(n=712)	3.32164	NA	NA
GTEX-WOFL-0726-SM-3MJG4	Normal(n=712)	3.50716	NA	NA
GTEX-WRHU-0926-SM-4E3IG	Normal(n=712)	3.72792	NA	NA
GTEX-WVLH-0626-SM-3MJG7	Normal(n=712)	3.57773	NA	NA
GTEX-WWYW-0826-SM-3NB2X	Normal(n=712)	3.87676	NA	NA
GTEX-WXYG-0226-SM-3NB2Y	Normal(n=712)	3.28599	NA	NA
GTEX-WY7C-0226-SM-3NB37	Normal(n=712)	3.35191	NA	NA
GTEX-WYBS-1926-SM-3NM8N	Normal(n=712)	3.32582	NA	NA
GTEX-WYJK-1626-SM-3NM9J	Normal(n=712)	3.64386	NA	NA
GTEX-WYVS-0326-SM-3NM9V	Normal(n=712)	3.78973	NA	NA
GTEX-X15G-0526-SM-3NMB7	Normal(n=712)	3.42465	NA	NA
GTEX-X261-0726-SM-EZ6MH	Normal(n=712)	3.89821	NA	NA
GTEX-X4LF-0426-SM-3NMB5	Normal(n=712)	3.28718	NA	NA
GTEX-X4XX-0926-SM-46MV7	Normal(n=712)	4.03914	NA	NA
GTEX-X4XY-0826-SM-4E3JM	Normal(n=712)	3.63691	NA	NA
GTEX-X5EB-0726-SM-46MVR	Normal(n=712)	3.44824	NA	NA
GTEX-X8HC-0726-SM-46MWG	Normal(n=712)	3.89142	NA	NA
GTEX-XBED-0126-SM-47JY7	Normal(n=712)	3.56438	NA	NA
GTEX-XBEW-0126-SM-4AT66	Normal(n=712)	3.21568	NA	NA
GTEX-XGQ4-0426-SM-4AT4I	Normal(n=712)	3.46989	NA	NA
GTEX-XLM4-0726-SM-4AT64	Normal(n=712)	3.854	NA	NA
GTEX-XMK1-0626-SM-4B65A	Normal(n=712)	3.34724	NA	NA
GTEX-XOT4-1526-SM-EAZ2W	Normal(n=712)	3.94486	NA	NA
GTEX-XUW1-1026-SM-4BONY	Normal(n=712)	3.43909	NA	NA
GTEX-XUZC-0126-SM-4BOO6	Normal(n=712)	3.1003	NA	NA
GTEX-XV7Q-0326-SM-4BRVM	Normal(n=712)	3.78764	NA	NA
GTEX-XXEK-1326-SM-4BRV1	Normal(n=712)	3.21925	NA	NA
GTEX-XYKS-0826-SM-4BRVF	Normal(n=712)	3.08389	NA	NA
GTEX-Y111-1926-SM-4SOIS	Normal(n=712)	3.25882	NA	NA
GTEX-Y114-0626-SM-4TT98	Normal(n=712)	3.39245	NA	NA
GTEX-Y3I4-0226-SM-4TT27	Normal(n=712)	2.8088	NA	NA
GTEX-Y3IK-0526-SM-4WWE3	Normal(n=712)	3.36555	NA	NA
GTEX-Y5LM-0626-SM-4V6G4	Normal(n=712)	3.33285	NA	NA
GTEX-Y5V5-0326-SM-5RQJG	Normal(n=712)	3.51979	NA	NA
GTEX-Y5V6-0526-SM-4VBRV	Normal(n=712)	3.05814	NA	NA
GTEX-Y8E4-0126-SM-4VBQ2	Normal(n=712)	3.1102	NA	NA
GTEX-Y9LG-0426-SM-4VBRT	Normal(n=712)	3.16269	NA	NA
GTEX-YB5E-0626-SM-4VDSE	Normal(n=712)	2.86691	NA	NA
GTEX-YB5K-0526-SM-5LUAS	Normal(n=712)	3.28199	NA	NA
GTEX-YEC3-0826-SM-4WWFP	Normal(n=712)	2.41061	NA	NA
GTEX-YEC4-0626-SM-5CVLU	Normal(n=712)	3.33928	NA	NA
GTEX-YF7O-0726-SM-4W213	Normal(n=712)	2.85579	NA	NA
GTEX-YFC4-2626-SM-5P9FQ	Normal(n=712)	3.55704	NA	NA
GTEX-YFCO-0326-SM-4W1ZP	Normal(n=712)	2.69019	NA	NA
GTEX-YJ89-0726-SM-5P9F7	Normal(n=712)	3.30305	NA	NA
GTEX-Z93S-0526-SM-EVYB4	Normal(n=712)	2.91456	NA	NA
GTEX-Z9EW-0226-SM-5CVM7	Normal(n=712)	2.94167	NA	NA
GTEX-ZA64-0426-SM-5HL96	Normal(n=712)	3.15591	NA	NA
GTEX-ZAB5-0726-SM-5P9JG	Normal(n=712)	3.82477	NA	NA
GTEX-ZAJG-0726-SM-5HL9A	Normal(n=712)	4.27053	NA	NA
GTEX-ZAK1-0726-SM-5HL8Q	Normal(n=712)	3.50335	NA	NA
GTEX-ZC5H-0626-SM-5LU9K	Normal(n=712)	3.82069	NA	NA
GTEX-ZDTS-0926-SM-5YY9D	Normal(n=712)	3.61117	NA	NA
GTEX-ZDXO-1726-SM-5HL6L	Normal(n=712)	3.67129	NA	NA
GTEX-ZDYS-0626-SM-5J2N5	Normal(n=712)	3.38267	NA	NA
GTEX-ZE7O-1126-SM-57WC8	Normal(n=712)	3.63807	NA	NA
GTEX-ZF28-0826-SM-4WKGJ	Normal(n=712)	3.94579	NA	NA
GTEX-ZF29-0726-SM-DO92H	Normal(n=712)	3.43909	NA	NA
GTEX-ZF3C-0826-SM-DO11E	Normal(n=712)	3.75916	NA	NA
GTEX-ZGAY-1026-SM-4WWBR	Normal(n=712)	3.37698	NA	NA
GTEX-ZLFU-0626-SM-4WWBO	Normal(n=712)	3.36233	NA	NA
GTEX-ZLV1-0126-SM-4WWBZ	Normal(n=712)	3.33199	NA	NA
GTEX-ZLWG-0526-SM-4WWFB	Normal(n=712)	3.19346	NA	NA
GTEX-ZPCL-0126-SM-4WWC8	Normal(n=712)	2.97801	NA	NA
GTEX-ZPIC-0226-SM-DO91T	Normal(n=712)	3.29646	NA	NA
GTEX-ZPU1-0426-SM-4WWCA	Normal(n=712)	3.42747	NA	NA
GTEX-ZQG8-0926-SM-57WFF	Normal(n=712)	2.89006	NA	NA
GTEX-ZQUD-0126-SM-7EPIS	Normal(n=712)	3.44599	NA	NA
GTEX-ZT9W-0226-SM-7SB6H	Normal(n=712)	2.77125	NA	NA
GTEX-ZT9X-0226-SM-51MT2	Normal(n=712)	3.22126	NA	NA
GTEX-ZTPG-0826-SM-5DUVC	Normal(n=712)	3.48285	NA	NA
GTEX-ZTSS-0226-SM-59877	Normal(n=712)	3.46728	NA	NA
GTEX-ZTX8-0626-SM-59HKC	Normal(n=712)	3.16639	NA	NA
GTEX-ZUA1-0926-SM-4YCDX	Normal(n=712)	3.52982	NA	NA
GTEX-ZV6S-0226-SM-59HJT	Normal(n=712)	3.27843	NA	NA
GTEX-ZV7C-0126-SM-57WDE	Normal(n=712)	3.30378	NA	NA
GTEX-ZVP2-0426-SM-57WC2	Normal(n=712)	3.13816	NA	NA
GTEX-ZVT3-0726-SM-5GICN	Normal(n=712)	3.73877	NA	NA
GTEX-ZVZP-1026-SM-5GICI	Normal(n=712)	2.96735	NA	NA
GTEX-ZVZQ-0626-SM-59HJU	Normal(n=712)	3.37393	NA	NA
GTEX-ZXG5-0926-SM-5NQ8H	Normal(n=712)	3.50462	NA	NA
GTEX-ZY6K-0226-SM-5SIAY	Normal(n=712)	3.2032	NA	NA
GTEX-ZYFC-0926-SM-5GZWW	Normal(n=712)	3.774	NA	NA
GTEX-ZYFD-0826-SM-5NQ9A	Normal(n=712)	3.46728	NA	NA
GTEX-ZYFG-0626-SM-5GZYA	Normal(n=712)	3.05363	NA	NA
GTEX-ZYT6-0426-SM-5GID3	Normal(n=712)	3.41075	NA	NA
GTEX-ZYVF-1126-SM-5E458	Normal(n=712)	3.64847	NA	NA
GTEX-ZYW4-1126-SM-5SI99	Normal(n=712)	3.88264	NA	NA
GTEX-ZYY3-1926-SM-5GZXS	Normal(n=712)	2.97251	NA	NA
GTEX-ZZ64-0126-SM-5GZXA	Normal(n=712)	3.54226	NA	NA
GTEX-ZZPU-1326-SM-5GZWS	Normal(n=712)	3.28718	NA	NA

## Sheet: ZCCHC3
rownames(datas)	Type	values	times	status
TCGA-IM-A420-01	G1(n=288)	4.71818	NA	NA
TCGA-EM-A3FO-01	G1(n=288)	5.44711	NA	NA
TCGA-EL-A3H7-01	G1(n=288)	4.62531	NA	NA
TCGA-BJ-A0ZC-01	G1(n=288)	5.36662	NA	NA
TCGA-EM-A4FO-01	G1(n=288)	5.01268	NA	NA
TCGA-DJ-A2PO-01	G1(n=288)	5.5432	NA	NA
TCGA-EL-A3ZT-01	G1(n=288)	5.15532	NA	NA
TCGA-DJ-A13O-01	G1(n=288)	5.30835	NA	NA
TCGA-EM-A1CW-01	G1(n=288)	4.8966	NA	NA
TCGA-E3-A3E2-01	G1(n=288)	5.99438	NA	NA
TCGA-E8-A416-01	G1(n=288)	5.84772	NA	NA
TCGA-ET-A2N3-01	G1(n=288)	6.24974	NA	NA
TCGA-DJ-A4V0-01	G1(n=288)	5.16551	NA	NA
TCGA-EL-A3T6-01	G1(n=288)	4.48704	NA	NA
TCGA-ET-A3BO-01	G1(n=288)	5.47917	NA	NA
TCGA-CE-A481-01	G1(n=288)	5.9162	NA	NA
TCGA-E8-A419-01	G1(n=288)	4.949	NA	NA
TCGA-E8-A438-01	G1(n=288)	5.30266	NA	NA
TCGA-E3-A3E0-01	G1(n=288)	6.09054	NA	NA
TCGA-ET-A3DS-01	G1(n=288)	5.45116	NA	NA
TCGA-DJ-A4UL-01	G1(n=288)	5.86014	NA	NA
TCGA-EM-A2CK-01	G1(n=288)	5.73718	NA	NA
TCGA-J8-A3O1-01	G1(n=288)	5.62768	NA	NA
TCGA-FE-A237-01	G1(n=288)	5.46695	NA	NA
TCGA-EM-A3O8-01	G1(n=288)	5.24737	NA	NA
TCGA-H2-A2K9-01	G1(n=288)	6.82659	NA	NA
TCGA-DJ-A1QM-01	G1(n=288)	5.19929	NA	NA
TCGA-H2-A3RH-01	G1(n=288)	6.06338	NA	NA
TCGA-IM-A41Z-01	G1(n=288)	5.52135	NA	NA
TCGA-IM-A3EB-01	G1(n=288)	4.83193	NA	NA
TCGA-EL-A3ZN-01	G1(n=288)	5.45151	NA	NA
TCGA-EL-A3ZS-01	G1(n=288)	5.20749	NA	NA
TCGA-EL-A3GR-01	G1(n=288)	5.03922	NA	NA
TCGA-ET-A39R-01	G1(n=288)	5.53658	NA	NA
TCGA-ET-A25O-01	G1(n=288)	6.20117	NA	NA
TCGA-BJ-A2N8-01	G1(n=288)	5.43544	NA	NA
TCGA-DJ-A13W-01	G1(n=288)	3.26529	NA	NA
TCGA-EL-A3N2-01	G1(n=288)	5.35262	NA	NA
TCGA-EM-A4FF-01	G1(n=288)	5.01469	NA	NA
TCGA-KS-A4I3-01	G1(n=288)	5.33464	NA	NA
TCGA-EM-A1CV-01	G1(n=288)	5.65789	NA	NA
TCGA-BJ-A3PR-01	G1(n=288)	5.26729	NA	NA
TCGA-BJ-A45J-01	G1(n=288)	5.38198	NA	NA
TCGA-EM-A3SY-01	G1(n=288)	3.86232	NA	NA
TCGA-FK-A3S3-01	G1(n=288)	5.81742	NA	NA
TCGA-FY-A3NP-01	G1(n=288)	5.67718	NA	NA
TCGA-FY-A3BL-01	G1(n=288)	5.3167	NA	NA
TCGA-MK-A4N6-01	G1(n=288)	4.63716	NA	NA
TCGA-E8-A437-01	G1(n=288)	4.94354	NA	NA
TCGA-EM-A3FL-01	G1(n=288)	5.04662	NA	NA
TCGA-J8-A3YH-01	G1(n=288)	5.9234	NA	NA
TCGA-E8-A433-01	G1(n=288)	5.19146	NA	NA
TCGA-E8-A2EA-01	G1(n=288)	5.07646	NA	NA
TCGA-ET-A3BU-01	G1(n=288)	5.20794	NA	NA
TCGA-EL-A4K0-01	G1(n=288)	5.7487	NA	NA
TCGA-DJ-A2PR-01	G1(n=288)	5.75217	NA	NA
TCGA-DJ-A3VJ-01	G1(n=288)	5.25386	NA	NA
TCGA-ET-A3DO-01	G1(n=288)	4.7395	NA	NA
TCGA-DJ-A3UV-01	G1(n=288)	5.40182	NA	NA
TCGA-J8-A3O2-06	G1(n=288)	5.82381	NA	NA
TCGA-IM-A4EB-01	G1(n=288)	4.63943	NA	NA
TCGA-FE-A234-01	G1(n=288)	5.18886	NA	NA
TCGA-EM-A2CQ-01	G1(n=288)	5.04946	NA	NA
TCGA-FY-A40K-01	G1(n=288)	5.54668	NA	NA
TCGA-ET-A40P-01	G1(n=288)	5.83871	NA	NA
TCGA-EL-A4KH-01	G1(n=288)	5.38883	NA	NA
TCGA-CE-A27D-01	G1(n=288)	5.53601	NA	NA
TCGA-KS-A4I7-01	G1(n=288)	5.85703	NA	NA
TCGA-EM-A3SZ-01	G1(n=288)	4.81002	NA	NA
TCGA-DJ-A4V4-01	G1(n=288)	5.37695	NA	NA
TCGA-EL-A4KG-01	G1(n=288)	5.16438	NA	NA
TCGA-FE-A3PD-01	G1(n=288)	5.82851	NA	NA
TCGA-ET-A40R-01	G1(n=288)	5.73119	NA	NA
TCGA-EM-A4FK-01	G1(n=288)	5.63669	NA	NA
TCGA-BJ-A2N9-01	G1(n=288)	5.05235	NA	NA
TCGA-EM-A22Q-01	G1(n=288)	4.55518	NA	NA
TCGA-FE-A23A-01	G1(n=288)	4.6154	NA	NA
TCGA-J8-A3O0-01	G1(n=288)	5.81068	NA	NA
TCGA-IM-A3ED-01	G1(n=288)	5.26966	NA	NA
TCGA-BJ-A18Y-01	G1(n=288)	5.72098	NA	NA
TCGA-EL-A3GZ-01	G1(n=288)	5.58702	NA	NA
TCGA-BJ-A0ZJ-01	G1(n=288)	5.73187	NA	NA
TCGA-FE-A232-01	G1(n=288)	5.42681	NA	NA
TCGA-DJ-A3UP-01	G1(n=288)	5.98041	NA	NA
TCGA-DJ-A1QN-01	G1(n=288)	6.1643	NA	NA
TCGA-EM-A3AJ-01	G1(n=288)	5.14045	NA	NA
TCGA-BJ-A45K-01	G1(n=288)	6.2491	NA	NA
TCGA-DJ-A3V2-01	G1(n=288)	5.65672	NA	NA
TCGA-J8-A3O2-01	G1(n=288)	5.83739	NA	NA
TCGA-ET-A3BN-01	G1(n=288)	5.05075	NA	NA
TCGA-FY-A3R9-01	G1(n=288)	4.56894	NA	NA
TCGA-KS-A41J-01	G1(n=288)	5.26411	NA	NA
TCGA-EL-A4K2-01	G1(n=288)	5.52686	NA	NA
TCGA-FY-A3WA-01	G1(n=288)	5.46388	NA	NA
TCGA-DJ-A13S-01	G1(n=288)	5.17045	NA	NA
TCGA-EM-A2P1-06	G1(n=288)	4.92323	NA	NA
TCGA-DJ-A3US-01	G1(n=288)	5.52787	NA	NA
TCGA-ET-A39N-01	G1(n=288)	5.48576	NA	NA
TCGA-EM-A4FV-01	G1(n=288)	5.62101	NA	NA
TCGA-ET-A40T-01	G1(n=288)	5.55439	NA	NA
TCGA-ET-A25J-01	G1(n=288)	5.40065	NA	NA
TCGA-BJ-A28R-01	G1(n=288)	5.60581	NA	NA
TCGA-BJ-A3F0-01	G1(n=288)	5.18074	NA	NA
TCGA-E3-A3E1-01	G1(n=288)	5.33175	NA	NA
TCGA-DJ-A3UM-01	G1(n=288)	5.37098	NA	NA
TCGA-BJ-A291-01	G1(n=288)	5.07553	NA	NA
TCGA-E8-A417-01	G1(n=288)	5.20001	NA	NA
TCGA-FE-A235-01	G1(n=288)	5.76729	NA	NA
TCGA-CE-A483-01	G1(n=288)	5.55807	NA	NA
TCGA-KS-A41F-01	G1(n=288)	4.63409	NA	NA
TCGA-ET-A39S-01	G1(n=288)	5.51719	NA	NA
TCGA-DJ-A3VL-01	G1(n=288)	5.41381	NA	NA
TCGA-ET-A25K-01	G1(n=288)	5.51253	NA	NA
TCGA-ET-A3BS-01	G1(n=288)	5.30539	NA	NA
TCGA-H2-A421-01	G1(n=288)	4.98642	NA	NA
TCGA-KS-A41I-01	G1(n=288)	3.77743	NA	NA
TCGA-EL-A3GO-01	G1(n=288)	6.39967	NA	NA
TCGA-EM-A2CL-01	G1(n=288)	5.70041	NA	NA
TCGA-MK-A4N7-01	G1(n=288)	5.92838	NA	NA
TCGA-CE-A13K-01	G1(n=288)	6.07095	NA	NA
TCGA-DJ-A1QQ-01	G1(n=288)	5.33403	NA	NA
TCGA-EL-A3H3-01	G1(n=288)	5.11902	NA	NA
TCGA-DJ-A4UP-01	G1(n=288)	5.66493	NA	NA
TCGA-DE-A7U5-01	G1(n=288)	4.44451	NA	NA
TCGA-DJ-A3VA-01	G1(n=288)	5.4458	NA	NA
TCGA-DJ-A4UT-01	G1(n=288)	5.01691	NA	NA
TCGA-ET-A25I-01	G1(n=288)	4.84317	NA	NA
TCGA-BJ-A45E-01	G1(n=288)	3.80805	NA	NA
TCGA-EM-A2CT-01	G1(n=288)	5.53711	NA	NA
TCGA-FY-A3ON-01	G1(n=288)	5.55691	NA	NA
TCGA-BJ-A28W-01	G1(n=288)	5.00601	NA	NA
TCGA-EL-A3CX-01	G1(n=288)	6.005	NA	NA
TCGA-DJ-A4V2-01	G1(n=288)	5.19271	NA	NA
TCGA-ET-A39M-01	G1(n=288)	5.13404	NA	NA
TCGA-FK-A3SB-01	G1(n=288)	5.7202	NA	NA
TCGA-H2-A422-01	G1(n=288)	5.05482	NA	NA
TCGA-DJ-A3UT-01	G1(n=288)	5.36861	NA	NA
TCGA-FK-A3SD-01	G1(n=288)	5.69532	NA	NA
TCGA-FY-A4B0-01	G1(n=288)	5.47571	NA	NA
TCGA-ET-A2MZ-01	G1(n=288)	5.63929	NA	NA
TCGA-E8-A2JQ-01	G1(n=288)	4.41414	NA	NA
TCGA-ET-A39L-01	G1(n=288)	6.03238	NA	NA
TCGA-EM-A3AP-01	G1(n=288)	6.11997	NA	NA
TCGA-MK-A4N9-01	G1(n=288)	5.62589	NA	NA
TCGA-DJ-A2PN-01	G1(n=288)	5.2725	NA	NA
TCGA-E3-A3DY-01	G1(n=288)	5.68122	NA	NA
TCGA-DJ-A3VD-01	G1(n=288)	4.96046	NA	NA
TCGA-ET-A3DP-01	G1(n=288)	5.85057	NA	NA
TCGA-EL-A4JW-01	G1(n=288)	4.7126	NA	NA
TCGA-E8-A415-01	G1(n=288)	5.46985	NA	NA
TCGA-ET-A3DU-01	G1(n=288)	4.34189	NA	NA
TCGA-FK-A3SE-01	G1(n=288)	5.3633	NA	NA
TCGA-DE-A69J-01	G1(n=288)	5.52476	NA	NA
TCGA-EL-A4K4-01	G1(n=288)	4.52806	NA	NA
TCGA-ET-A39I-01	G1(n=288)	5.8606	NA	NA
TCGA-EL-A3CZ-01	G1(n=288)	5.32327	NA	NA
TCGA-DJ-A1QG-01	G1(n=288)	4.79072	NA	NA
TCGA-GE-A2C6-01	G1(n=288)	5.67148	NA	NA
TCGA-DJ-A3UN-01	G1(n=288)	6.00888	NA	NA
TCGA-EL-A3ZP-01	G1(n=288)	5.32755	NA	NA
TCGA-J8-A3YE-01	G1(n=288)	5.09938	NA	NA
TCGA-DJ-A13T-01	G1(n=288)	5.69895	NA	NA
TCGA-EM-A3FQ-01	G1(n=288)	5.53344	NA	NA
TCGA-DJ-A3UY-01	G1(n=288)	5.07069	NA	NA
TCGA-FE-A230-01	G1(n=288)	4.52761	NA	NA
TCGA-EL-A3H1-01	G1(n=288)	6.2679	NA	NA
TCGA-DJ-A2PS-01	G1(n=288)	5.76847	NA	NA
TCGA-EM-A1CU-01	G1(n=288)	5.48937	NA	NA
TCGA-ET-A40Q-01	G1(n=288)	4.64949	NA	NA
TCGA-EL-A3ZH-01	G1(n=288)	5.15188	NA	NA
TCGA-ET-A3BQ-01	G1(n=288)	5.29861	NA	NA
TCGA-ET-A3BX-01	G1(n=288)	4.95446	NA	NA
TCGA-EL-A3ZL-01	G1(n=288)	5.56749	NA	NA
TCGA-EM-A22N-01	G1(n=288)	4.28244	NA	NA
TCGA-BJ-A2N7-01	G1(n=288)	6.07271	NA	NA
TCGA-DJ-A1QD-01	G1(n=288)	4.97501	NA	NA
TCGA-BJ-A45D-01	G1(n=288)	5.40198	NA	NA
TCGA-ET-A2MX-01	G1(n=288)	4.82447	NA	NA
TCGA-EM-A3AN-01	G1(n=288)	5.96831	NA	NA
TCGA-CE-A482-01	G1(n=288)	5.74948	NA	NA
TCGA-FY-A3RA-01	G1(n=288)	5.42235	NA	NA
TCGA-DE-A0Y2-01	G1(n=288)	5.09305	NA	NA
TCGA-BJ-A0ZG-01	G1(n=288)	5.72613	NA	NA
TCGA-DJ-A2PQ-01	G1(n=288)	5.86492	NA	NA
TCGA-DJ-A3VG-01	G1(n=288)	5.5766	NA	NA
TCGA-E8-A434-01	G1(n=288)	5.80328	NA	NA
TCGA-DJ-A2Q6-01	G1(n=288)	5.90884	NA	NA
TCGA-DJ-A2Q1-01	G1(n=288)	4.46369	NA	NA
TCGA-EM-A2P3-01	G1(n=288)	5.9449	NA	NA
TCGA-BJ-A28T-01	G1(n=288)	4.87533	NA	NA
TCGA-ET-A39O-01	G1(n=288)	4.59393	NA	NA
TCGA-EL-A3T1-01	G1(n=288)	4.68616	NA	NA
TCGA-E8-A44M-01	G1(n=288)	5.30678	NA	NA
TCGA-EM-A1CS-01	G1(n=288)	5.97017	NA	NA
TCGA-CE-A485-01	G1(n=288)	5.61269	NA	NA
TCGA-BJ-A0Z3-01	G1(n=288)	5.88354	NA	NA
TCGA-EL-A3ZK-01	G1(n=288)	4.80694	NA	NA
TCGA-EM-A3FJ-01	G1(n=288)	6.13184	NA	NA
TCGA-E8-A44K-01	G1(n=288)	5.06064	NA	NA
TCGA-EL-A3H8-01	G1(n=288)	5.83195	NA	NA
TCGA-BJ-A191-01	G1(n=288)	6.30436	NA	NA
TCGA-FY-A40M-01	G1(n=288)	6.2783	NA	NA
TCGA-EM-A2OZ-01	G1(n=288)	5.4867	NA	NA
TCGA-BJ-A28X-01	G1(n=288)	5.27853	NA	NA
TCGA-EL-A3GW-01	G1(n=288)	6.01255	NA	NA
TCGA-EM-A3FQ-06	G1(n=288)	5.22906	NA	NA
TCGA-IM-A41Y-01	G1(n=288)	5.12763	NA	NA
TCGA-DJ-A13L-01	G1(n=288)	4.97165	NA	NA
TCGA-DO-A1JZ-01	G1(n=288)	5.87516	NA	NA
TCGA-ET-A2MY-01	G1(n=288)	5.05023	NA	NA
TCGA-EL-A3T8-01	G1(n=288)	5.52896	NA	NA
TCGA-ET-A25P-01	G1(n=288)	5.75929	NA	NA
TCGA-EM-A3FK-01	G1(n=288)	5.51984	NA	NA
TCGA-H2-A3RI-01	G1(n=288)	5.55001	NA	NA
TCGA-DJ-A3V8-01	G1(n=288)	5.24848	NA	NA
TCGA-EM-A3SU-06	G1(n=288)	5.02343	NA	NA
TCGA-EL-A3CV-01	G1(n=288)	4.95705	NA	NA
TCGA-BJ-A45F-01	G1(n=288)	4.72707	NA	NA
TCGA-KS-A41L-01	G1(n=288)	4.97389	NA	NA
TCGA-DO-A1K0-01	G1(n=288)	5.2839	NA	NA
TCGA-EM-A3SX-01	G1(n=288)	6.059	NA	NA
TCGA-ET-A39J-01	G1(n=288)	5.6621	NA	NA
TCGA-L6-A4EP-01	G1(n=288)	5.47272	NA	NA
TCGA-DJ-A13V-01	G1(n=288)	5.7288	NA	NA
TCGA-DE-A2OL-01	G1(n=288)	6.61667	NA	NA
TCGA-FY-A3I4-01	G1(n=288)	5.29444	NA	NA
TCGA-EM-A4FQ-01	G1(n=288)	4.82286	NA	NA
TCGA-EM-A2P1-01	G1(n=288)	4.2628	NA	NA
TCGA-EL-A3GQ-01	G1(n=288)	5.66583	NA	NA
TCGA-EL-A4JV-01	G1(n=288)	5.92787	NA	NA
TCGA-EL-A3D1-01	G1(n=288)	5.64382	NA	NA
TCGA-KS-A4ID-01	G1(n=288)	4.57543	NA	NA
TCGA-FY-A40N-01	G1(n=288)	6.09847	NA	NA
TCGA-FE-A233-01	G1(n=288)	5.26591	NA	NA
TCGA-DJ-A4UW-01	G1(n=288)	5.27607	NA	NA
TCGA-EM-A3AL-01	G1(n=288)	6.25107	NA	NA
TCGA-J8-A3YH-06	G1(n=288)	5.89535	NA	NA
TCGA-FE-A236-01	G1(n=288)	5.38519	NA	NA
TCGA-EM-A3AK-01	G1(n=288)	5.51545	NA	NA
TCGA-KS-A4I9-01	G1(n=288)	5.0141	NA	NA
TCGA-EM-A2CJ-01	G1(n=288)	5.64627	NA	NA
TCGA-CE-A484-01	G1(n=288)	6.01123	NA	NA
TCGA-ET-A25M-01	G1(n=288)	5.27208	NA	NA
TCGA-DJ-A13M-01	G1(n=288)	6.11865	NA	NA
TCGA-ET-A3BP-01	G1(n=288)	6.06088	NA	NA
TCGA-EL-A3TA-01	G1(n=288)	5.49368	NA	NA
TCGA-IM-A3U3-01	G1(n=288)	5.50908	NA	NA
TCGA-EM-A2CP-01	G1(n=288)	5.06462	NA	NA
TCGA-EM-A22L-01	G1(n=288)	5.55432	NA	NA
TCGA-DE-A4M9-01	G1(n=288)	5.32323	NA	NA
TCGA-DJ-A3UK-01	G1(n=288)	6.1278	NA	NA
TCGA-DE-A4MC-01	G1(n=288)	4.63759	NA	NA
TCGA-ET-A3BW-01	G1(n=288)	6.32615	NA	NA
TCGA-E8-A413-01	G1(n=288)	5.56158	NA	NA
TCGA-FK-A3SG-01	G1(n=288)	5.43618	NA	NA
TCGA-EM-A22M-01	G1(n=288)	4.55744	NA	NA
TCGA-EL-A3CY-01	G1(n=288)	5.14263	NA	NA
TCGA-FE-A3PB-01	G1(n=288)	5.10493	NA	NA
TCGA-EM-A3AR-01	G1(n=288)	5.55036	NA	NA
TCGA-EM-A3OB-01	G1(n=288)	6.24899	NA	NA
TCGA-DJ-A3UX-01	G1(n=288)	5.42072	NA	NA
TCGA-KS-A4I1-01	G1(n=288)	5.82156	NA	NA
TCGA-EL-A3ZG-01	G1(n=288)	5.21068	NA	NA
TCGA-ET-A3DT-01	G1(n=288)	4.83261	NA	NA
TCGA-EL-A3GX-01	G1(n=288)	5.21829	NA	NA
TCGA-EM-A2OW-01	G1(n=288)	4.57888	NA	NA
TCGA-DJ-A3VE-01	G1(n=288)	5.53497	NA	NA
TCGA-BJ-A2P4-01	G1(n=288)	5.76604	NA	NA
TCGA-EM-A4FU-01	G1(n=288)	5.19105	NA	NA
TCGA-FE-A3PC-01	G1(n=288)	4.68137	NA	NA
TCGA-EM-A3SU-01	G1(n=288)	4.75891	NA	NA
TCGA-EM-A4G1-01	G1(n=288)	5.09626	NA	NA
TCGA-KS-A4IB-01	G1(n=288)	5.39824	NA	NA
TCGA-ET-A3DR-01	G1(n=288)	5.24141	NA	NA
TCGA-ET-A25N-01	G1(n=288)	5.12272	NA	NA
TCGA-CE-A3MD-01	G1(n=288)	5.8438	NA	NA
TCGA-EM-A3FN-01	G1(n=288)	5.03105	NA	NA
TCGA-DJ-A2PX-01	G1(n=288)	5.66617	NA	NA
TCGA-EM-A2P0-01	G1(n=288)	5.73033	NA	NA
TCGA-EL-A3GS-01	G1(n=288)	5.12191	NA	NA
TCGA-EM-A4FR-01	G1(n=288)	4.49986	NA	NA
TCGA-EL-A4KD-01	G1(n=288)	5.22548	NA	NA
TCGA-FE-A238-01	G1(n=288)	5.19749	NA	NA
TCGA-DJ-A3UW-01	G1(n=288)	4.47103	NA	NA
TCGA-EM-A3AQ-01	G1(n=288)	5.89761	NA	NA
TCGA-EL-A4JX-01	G1(n=288)	4.08047	NA	NA
TCGA-EL-A3D5-01	G1(n=288)	6.88068	NA	NA
TCGA-ET-A3DQ-01	G1(n=288)	5.61038	NA	NA
TCGA-FE-A3PA-01	G2(n=52)	5.4251	NA	NA
TCGA-FY-A76V-01	G2(n=52)	5.83958	NA	NA
TCGA-EM-A2CR-01	G2(n=52)	5.53016	NA	NA
TCGA-BJ-A190-01	G2(n=52)	5.61305	NA	NA
TCGA-ET-A3DV-01	G2(n=52)	6.65919	NA	NA
TCGA-DJ-A4UR-01	G2(n=52)	4.7279	NA	NA
TCGA-EM-A3AI-01	G2(n=52)	5.92823	NA	NA
TCGA-EM-A1YD-01	G2(n=52)	5.50787	NA	NA
TCGA-DJ-A2PV-01	G2(n=52)	5.73623	NA	NA
TCGA-EM-A3O6-01	G2(n=52)	5.22906	NA	NA
TCGA-EM-A3FP-01	G2(n=52)	5.78128	NA	NA
TCGA-DJ-A13P-01	G2(n=52)	5.90298	NA	NA
TCGA-EL-A4K9-01	G2(n=52)	5.4991	NA	NA
TCGA-EL-A3CL-01	G2(n=52)	5.90039	NA	NA
TCGA-EM-A3OA-01	G2(n=52)	5.38113	NA	NA
TCGA-EL-A3MW-01	G2(n=52)	5.92866	NA	NA
TCGA-DJ-A1QF-01	G2(n=52)	5.32034	NA	NA
TCGA-DJ-A2PP-01	G2(n=52)	5.19729	NA	NA
TCGA-DJ-A2PU-01	G2(n=52)	5.76412	NA	NA
TCGA-ET-A40S-01	G2(n=52)	5.30962	NA	NA
TCGA-BJ-A0ZF-01	G2(n=52)	5.83492	NA	NA
TCGA-EM-A1YA-01	G2(n=52)	5.16151	NA	NA
TCGA-DJ-A3V3-01	G2(n=52)	5.6313	NA	NA
TCGA-BJ-A0ZA-01	G2(n=52)	5.56938	NA	NA
TCGA-BJ-A0Z0-01	G2(n=52)	5.92653	NA	NA
TCGA-EL-A3H2-01	G2(n=52)	5.78474	NA	NA
TCGA-DJ-A2QC-01	G2(n=52)	5.91678	NA	NA
TCGA-EL-A3CN-01	G2(n=52)	4.53323	NA	NA
TCGA-EL-A3GY-01	G2(n=52)	5.36667	NA	NA
TCGA-E8-A432-01	G2(n=52)	6.03339	NA	NA
TCGA-EL-A3T7-01	G2(n=52)	5.38338	NA	NA
TCGA-DJ-A3VM-01	G2(n=52)	5.43322	NA	NA
TCGA-BJ-A28S-01	G2(n=52)	6.30004	NA	NA
TCGA-BJ-A4O9-01	G2(n=52)	5.73648	NA	NA
TCGA-BJ-A0YZ-01	G2(n=52)	5.07679	NA	NA
TCGA-EL-A3ZR-01	G2(n=52)	6.10305	NA	NA
TCGA-EM-A1YB-01	G2(n=52)	4.2302	NA	NA
TCGA-FY-A3W9-01	G2(n=52)	5.72084	NA	NA
TCGA-DJ-A1QL-01	G2(n=52)	6.23443	NA	NA
TCGA-DJ-A1QI-01	G2(n=52)	5.78857	NA	NA
TCGA-EL-A3N3-01	G2(n=52)	4.56016	NA	NA
TCGA-EM-A2OV-01	G2(n=52)	4.42671	NA	NA
TCGA-EL-A3T3-01	G2(n=52)	4.76005	NA	NA
TCGA-CE-A3ME-01	G2(n=52)	5.53158	NA	NA
TCGA-E3-A3E3-01	G2(n=52)	5.02865	NA	NA
TCGA-EM-A22J-01	G2(n=52)	5.01205	NA	NA
TCGA-EL-A3ZQ-01	G2(n=52)	4.71668	NA	NA
TCGA-DJ-A2Q0-01	G2(n=52)	4.41075	NA	NA
TCGA-EM-A2CO-01	G2(n=52)	4.58916	NA	NA
TCGA-EM-A2OY-01	G2(n=52)	4.42299	NA	NA
TCGA-EM-A1YE-01	G2(n=52)	5.37507	NA	NA
TCGA-ET-A4KQ-01	G2(n=52)	5.8749	NA	NA
TCGA-ET-A2N0-01	G3(n=113)	4.79775	NA	NA
TCGA-EM-A1YC-01	G3(n=113)	5.29854	NA	NA
TCGA-MK-A84Z-01	G3(n=113)	5.65434	NA	NA
TCGA-FY-A3NN-01	G3(n=113)	5.05653	NA	NA
TCGA-DJ-A1QO-01	G3(n=113)	4.6559	NA	NA
TCGA-EL-A3GV-01	G3(n=113)	5.50182	NA	NA
TCGA-BJ-A2NA-01	G3(n=113)	5.23755	NA	NA
TCGA-EL-A3CM-01	G3(n=113)	4.83017	NA	NA
TCGA-EM-A3O3-01	G3(n=113)	4.77044	NA	NA
TCGA-FY-A3TY-01	G3(n=113)	5.28892	NA	NA
TCGA-EL-A3D6-01	G3(n=113)	4.36609	NA	NA
TCGA-J8-A3YF-01	G3(n=113)	4.70472	NA	NA
TCGA-ET-A25G-01	G3(n=113)	4.64219	NA	NA
TCGA-EM-A3FR-01	G3(n=113)	6.02218	NA	NA
TCGA-BJ-A3PT-01	G3(n=113)	5.5403	NA	NA
TCGA-DJ-A2Q7-01	G3(n=113)	6.10819	NA	NA
TCGA-FK-A3SH-01	G3(n=113)	5.64836	NA	NA
TCGA-DJ-A13X-01	G3(n=113)	5.52483	NA	NA
TCGA-EL-A3CU-01	G3(n=113)	5.24152	NA	NA
TCGA-J8-A3YD-01	G3(n=113)	5.37893	NA	NA
TCGA-FY-A3YR-01	G3(n=113)	4.66647	NA	NA
TCGA-BJ-A28V-01	G3(n=113)	6.59984	NA	NA
TCGA-E8-A242-01	G3(n=113)	4.46075	NA	NA
TCGA-EL-A3CR-01	G3(n=113)	4.7965	NA	NA
TCGA-FE-A239-01	G3(n=113)	5.34802	NA	NA
TCGA-DE-A69K-01	G3(n=113)	5.93642	NA	NA
TCGA-EL-A3D0-01	G3(n=113)	5.51824	NA	NA
TCGA-EM-A2CM-01	G3(n=113)	5.29116	NA	NA
TCGA-EL-A4K1-01	G3(n=113)	4.06459	NA	NA
TCGA-DJ-A2QA-01	G3(n=113)	4.89282	NA	NA
TCGA-ET-A3BV-01	G3(n=113)	5.28454	NA	NA
TCGA-EL-A4KI-01	G3(n=113)	6.12745	NA	NA
TCGA-DJ-A3VB-01	G3(n=113)	4.90657	NA	NA
TCGA-J8-A3YG-01	G3(n=113)	4.92718	NA	NA
TCGA-EL-A3T2-01	G3(n=113)	5.97312	NA	NA
TCGA-ET-A39K-01	G3(n=113)	5.50886	NA	NA
TCGA-H2-A26U-01	G3(n=113)	5.10207	NA	NA
TCGA-BJ-A45H-01	G3(n=113)	5.50305	NA	NA
TCGA-EM-A2P2-01	G3(n=113)	5.72573	NA	NA
TCGA-EL-A4K7-01	G3(n=113)	5.48216	NA	NA
TCGA-DJ-A3V4-01	G3(n=113)	5.25373	NA	NA
TCGA-FY-A3R8-01	G3(n=113)	5.24068	NA	NA
TCGA-DJ-A3UU-01	G3(n=113)	5.49517	NA	NA
TCGA-DJ-A3UQ-01	G3(n=113)	5.15681	NA	NA
TCGA-ET-A2N4-01	G3(n=113)	5.97083	NA	NA
TCGA-J8-A42S-01	G3(n=113)	5.95029	NA	NA
TCGA-J8-A4HW-01	G3(n=113)	5.38057	NA	NA
TCGA-FK-A4UB-01	G3(n=113)	4.99338	NA	NA
TCGA-DJ-A2PW-01	G3(n=113)	5.82945	NA	NA
TCGA-EL-A3MZ-01	G3(n=113)	4.91974	NA	NA
TCGA-BJ-A45C-01	G3(n=113)	5.82752	NA	NA
TCGA-EL-A3TB-01	G3(n=113)	5.8865	NA	NA
TCGA-BJ-A45G-01	G3(n=113)	5.56269	NA	NA
TCGA-DE-A0XZ-01	G3(n=113)	5.80444	NA	NA
TCGA-BJ-A45I-01	G3(n=113)	5.05047	NA	NA
TCGA-DJ-A2PZ-01	G3(n=113)	5.25926	NA	NA
TCGA-DJ-A3V7-01	G3(n=113)	5.38809	NA	NA
TCGA-DJ-A2Q4-01	G3(n=113)	5.38678	NA	NA
TCGA-DJ-A3UR-01	G3(n=113)	6.03657	NA	NA
TCGA-DJ-A3V5-01	G3(n=113)	5.11141	NA	NA
TCGA-DJ-A1QH-01	G3(n=113)	5.35875	NA	NA
TCGA-BJ-A3PU-01	G3(n=113)	4.98068	NA	NA
TCGA-BJ-A192-01	G3(n=113)	5.8542	NA	NA
TCGA-E8-A414-01	G3(n=113)	5.55167	NA	NA
TCGA-BJ-A0Z5-01	G3(n=113)	5.28015	NA	NA
TCGA-ET-A3DW-01	G3(n=113)	5.21136	NA	NA
TCGA-EM-A22I-01	G3(n=113)	4.65282	NA	NA
TCGA-DJ-A2Q3-01	G3(n=113)	5.1384	NA	NA
TCGA-L6-A4EU-01	G3(n=113)	4.65723	NA	NA
TCGA-DJ-A3UZ-01	G3(n=113)	5.94947	NA	NA
TCGA-DJ-A2PY-01	G3(n=113)	5.25097	NA	NA
TCGA-EL-A3GP-01	G3(n=113)	4.65558	NA	NA
TCGA-EM-A3O7-01	G3(n=113)	5.94899	NA	NA
TCGA-EM-A2CU-01	G3(n=113)	5.76955	NA	NA
TCGA-ET-A4KN-01	G3(n=113)	2.71119	NA	NA
TCGA-FY-A3R7-01	G3(n=113)	5.7538	NA	NA
TCGA-DJ-A2Q2-01	G3(n=113)	5.16921	NA	NA
TCGA-DJ-A1QE-01	G3(n=113)	4.9535	NA	NA
TCGA-DJ-A13U-01	G3(n=113)	5.04441	NA	NA
TCGA-EL-A4JZ-01	G3(n=113)	5.54069	NA	NA
TCGA-J8-A4HW-06	G3(n=113)	5.48769	NA	NA
TCGA-BJ-A0ZE-01	G3(n=113)	4.7127	NA	NA
TCGA-EM-A4FH-01	G3(n=113)	5.69177	NA	NA
TCGA-EL-A3CW-01	G3(n=113)	5.32711	NA	NA
TCGA-EM-A3ST-01	G3(n=113)	5.722	NA	NA
TCGA-BJ-A290-01	G3(n=113)	5.77346	NA	NA
TCGA-FY-A3I5-01	G3(n=113)	5.17665	NA	NA
TCGA-FY-A4B4-01	G3(n=113)	4.89734	NA	NA
TCGA-FY-A4B3-01	G3(n=113)	5.41264	NA	NA
TCGA-ET-A39P-01	G3(n=113)	5.0884	NA	NA
TCGA-DJ-A13R-01	G3(n=113)	3.41134	NA	NA
TCGA-EL-A3CO-01	G3(n=113)	5.2173	NA	NA
TCGA-KS-A4IC-01	G3(n=113)	5.50738	NA	NA
TCGA-DJ-A2PT-01	G3(n=113)	4.73763	NA	NA
TCGA-ET-A25R-01	G3(n=113)	4.96325	NA	NA
TCGA-EL-A3GU-01	G3(n=113)	4.70835	NA	NA
TCGA-DJ-A2Q9-01	G3(n=113)	4.86807	NA	NA
TCGA-J8-A3NZ-01	G3(n=113)	5.50148	NA	NA
TCGA-E3-A3DZ-01	G3(n=113)	5.84108	NA	NA
TCGA-DJ-A3VI-01	G3(n=113)	5.12604	NA	NA
TCGA-DJ-A3VK-01	G3(n=113)	6.10252	NA	NA
TCGA-BJ-A0Z9-01	G3(n=113)	4.92473	NA	NA
TCGA-EL-A3ZO-01	G3(n=113)	4.70691	NA	NA
TCGA-DE-A4M8-01	G3(n=113)	4.66412	NA	NA
TCGA-BJ-A28Z-01	G3(n=113)	4.53659	NA	NA
TCGA-EL-A3T0-01	G3(n=113)	5.45268	NA	NA
TCGA-DJ-A3V6-01	G3(n=113)	5.23844	NA	NA
TCGA-BJ-A4O8-01	G3(n=113)	4.99806	NA	NA
TCGA-DE-A4MA-01	G3(n=113)	4.43893	NA	NA
TCGA-ET-A2N5-01	G3(n=113)	5.20799	NA	NA
TCGA-ET-A39T-01	G3(n=113)	5.29574	NA	NA
TCGA-L6-A4EQ-01	G3(n=113)	5.86951	NA	NA
TCGA-FY-A3NM-01	G3(n=113)	5.35019	NA	NA
TCGA-KS-A4I5-01	G4(n=57)	5.36549	NA	NA
TCGA-EM-A4FM-01	G4(n=57)	4.85293	NA	NA
TCGA-DJ-A3V9-01	G4(n=57)	5.49293	NA	NA
TCGA-E8-A436-01	G4(n=57)	5.17291	NA	NA
TCGA-EM-A2OX-01	G4(n=57)	5.57938	NA	NA
TCGA-DE-A0Y3-01	G4(n=57)	5.19745	NA	NA
TCGA-EL-A3CT-01	G4(n=57)	4.61942	NA	NA
TCGA-EM-A22O-01	G4(n=57)	5.01207	NA	NA
TCGA-DE-A3KN-01	G4(n=57)	5.99351	NA	NA
TCGA-FE-A22Z-01	G4(n=57)	4.79028	NA	NA
TCGA-E8-A418-01	G4(n=57)	4.99487	NA	NA
TCGA-EL-A3D4-01	G4(n=57)	5.98064	NA	NA
TCGA-EM-A2CN-01	G4(n=57)	5.48867	NA	NA
TCGA-EM-A3AO-01	G4(n=57)	5.15245	NA	NA
TCGA-DJ-A4V5-01	G4(n=57)	5.37304	NA	NA
TCGA-EL-A3H5-01	G4(n=57)	3.42222	NA	NA
TCGA-EL-A3T9-01	G4(n=57)	5.42928	NA	NA
TCGA-EM-A3FM-01	G4(n=57)	4.60958	NA	NA
TCGA-QD-A8IV-01	G4(n=57)	5.83061	NA	NA
TCGA-EM-A2CS-01	G4(n=57)	5.76051	NA	NA
TCGA-EL-A3ZM-01	G4(n=57)	4.13277	NA	NA
TCGA-DJ-A3V0-01	G4(n=57)	5.16739	NA	NA
TCGA-ET-A3BT-01	G4(n=57)	5.6018	NA	NA
TCGA-J8-A4HY-01	G4(n=57)	5.42773	NA	NA
TCGA-EL-A4K6-01	G4(n=57)	5.33477	NA	NA
TCGA-EL-A3MY-01	G4(n=57)	4.98655	NA	NA
TCGA-E8-A3X7-01	G4(n=57)	5.1653	NA	NA
TCGA-BJ-A0ZB-01	G4(n=57)	5.2009	NA	NA
TCGA-EM-A4FN-01	G4(n=57)	4.63766	NA	NA
TCGA-FY-A40L-01	G4(n=57)	4.86095	NA	NA
TCGA-DJ-A3VF-01	G4(n=57)	4.52847	NA	NA
TCGA-BJ-A3EZ-01	G4(n=57)	4.97292	NA	NA
TCGA-DJ-A3UO-01	G4(n=57)	5.6541	NA	NA
TCGA-DE-A4MB-01	G4(n=57)	4.75699	NA	NA
TCGA-DE-A4MD-06	G4(n=57)	4.5716	NA	NA
TCGA-IM-A3U2-01	G4(n=57)	4.8283	NA	NA
TCGA-EM-A2CS-06	G4(n=57)	5.74307	NA	NA
TCGA-DJ-A2Q5-01	G4(n=57)	5.53575	NA	NA
TCGA-BJ-A0ZH-01	G4(n=57)	5.3047	NA	NA
TCGA-DJ-A2QB-01	G4(n=57)	5.25774	NA	NA
TCGA-DJ-A4UQ-01	G4(n=57)	5.8876	NA	NA
TCGA-BJ-A0Z2-01	G4(n=57)	5.92207	NA	NA
TCGA-ET-A25L-01	G4(n=57)	5.12346	NA	NA
TCGA-EL-A3MX-01	G4(n=57)	5.48326	NA	NA
TCGA-L6-A4ET-01	G4(n=57)	6.08873	NA	NA
TCGA-E3-A3E5-01	G4(n=57)	6.20022	NA	NA
TCGA-BJ-A18Z-01	G4(n=57)	5.33209	NA	NA
TCGA-4C-A93U-01	G4(n=57)	4.75181	NA	NA
TCGA-EL-A3CS-01	G4(n=57)	5.14039	NA	NA
TCGA-FY-A3R6-01	G4(n=57)	5.38995	NA	NA
TCGA-DO-A2HM-01	G4(n=57)	5.19625	NA	NA
TCGA-EM-A22P-01	G4(n=57)	5.81757	NA	NA
TCGA-DE-A4MD-01	G4(n=57)	5.22333	NA	NA
TCGA-EM-A22K-01	G4(n=57)	5.82047	NA	NA
TCGA-EM-A1CT-01	G4(n=57)	5.04248	NA	NA
TCGA-FE-A231-01	G4(n=57)	4.74703	NA	NA
TCGA-EL-A3H4-01	G4(n=57)	5.05318	NA	NA
TCGA-ET-A3DW-11	Normal(n=712)	5.65418	NA	NA
TCGA-EL-A3TA-11	Normal(n=712)	5.8179	NA	NA
TCGA-EL-A3T7-11	Normal(n=712)	5.24309	NA	NA
TCGA-BJ-A3PR-11	Normal(n=712)	5.1852	NA	NA
TCGA-DO-A1JZ-11	Normal(n=712)	5.72428	NA	NA
TCGA-BJ-A28W-11	Normal(n=712)	4.23389	NA	NA
TCGA-BJ-A28R-11	Normal(n=712)	5.3635	NA	NA
TCGA-KS-A41I-11	Normal(n=712)	5.24816	NA	NA
TCGA-EL-A3ZG-11	Normal(n=712)	5.40999	NA	NA
TCGA-BJ-A2N7-11	Normal(n=712)	5.7947	NA	NA
TCGA-EL-A3ZQ-11	Normal(n=712)	5.18146	NA	NA
TCGA-EM-A1CV-11	Normal(n=712)	6.00145	NA	NA
TCGA-BJ-A290-11	Normal(n=712)	5.79389	NA	NA
TCGA-EL-A3ZO-11	Normal(n=712)	5.49091	NA	NA
TCGA-EL-A3T8-11	Normal(n=712)	5.67366	NA	NA
TCGA-H2-A3RI-11	Normal(n=712)	5.5634	NA	NA
TCGA-EL-A3N2-11	Normal(n=712)	5.77557	NA	NA
TCGA-BJ-A28X-11	Normal(n=712)	5.45143	NA	NA
TCGA-EM-A1YC-11	Normal(n=712)	4.96405	NA	NA
TCGA-EL-A3MX-11	Normal(n=712)	5.88494	NA	NA
TCGA-ET-A2N5-11	Normal(n=712)	5.849	NA	NA
TCGA-EL-A3T2-11	Normal(n=712)	6.00207	NA	NA
TCGA-GE-A2C6-11	Normal(n=712)	5.55224	NA	NA
TCGA-ET-A3DP-11	Normal(n=712)	5.6604	NA	NA
TCGA-BJ-A3PU-11	Normal(n=712)	5.91316	NA	NA
TCGA-EL-A3ZH-11	Normal(n=712)	5.43742	NA	NA
TCGA-EL-A3ZP-11	Normal(n=712)	5.30884	NA	NA
TCGA-EL-A3H2-11	Normal(n=712)	5.86044	NA	NA
TCGA-EM-A1CU-11	Normal(n=712)	6.0574	NA	NA
TCGA-EL-A3T3-11	Normal(n=712)	5.55209	NA	NA
TCGA-H2-A2K9-11	Normal(n=712)	5.33794	NA	NA
TCGA-EM-A3ST-11	Normal(n=712)	5.75466	NA	NA
TCGA-EL-A3H7-11	Normal(n=712)	5.40763	NA	NA
TCGA-EL-A3T6-11	Normal(n=712)	5.35766	NA	NA
TCGA-EL-A3MY-11	Normal(n=712)	5.58827	NA	NA
TCGA-EL-A3TB-11	Normal(n=712)	5.87127	NA	NA
TCGA-FY-A3TY-11	Normal(n=712)	5.70823	NA	NA
TCGA-EL-A3T0-11	Normal(n=712)	5.51721	NA	NA
TCGA-BJ-A2N8-11	Normal(n=712)	6.06515	NA	NA
TCGA-BJ-A2NA-11	Normal(n=712)	5.31916	NA	NA
TCGA-EM-A1CS-11	Normal(n=712)	5.74009	NA	NA
TCGA-EL-A3ZR-11	Normal(n=712)	5.6964	NA	NA
TCGA-EL-A3ZS-11	Normal(n=712)	4.73359	NA	NA
TCGA-EM-A1CW-11	Normal(n=712)	5.6316	NA	NA
TCGA-ET-A2MX-11	Normal(n=712)	5.62361	NA	NA
TCGA-EL-A3ZT-11	Normal(n=712)	5.48937	NA	NA
TCGA-KS-A41L-11	Normal(n=712)	5.68503	NA	NA
TCGA-KS-A41J-11	Normal(n=712)	5.72209	NA	NA
TCGA-EM-A1CT-11	Normal(n=712)	5.85232	NA	NA
TCGA-E8-A2JQ-11	Normal(n=712)	5.59412	NA	NA
TCGA-EL-A3N3-11	Normal(n=712)	5.47883	NA	NA
TCGA-EL-A3H1-11	Normal(n=712)	5.17639	NA	NA
TCGA-EL-A3T1-11	Normal(n=712)	5.22879	NA	NA
TCGA-EL-A3MW-11	Normal(n=712)	5.35048	NA	NA
TCGA-EL-A3ZM-11	Normal(n=712)	5.58121	NA	NA
TCGA-BJ-A2N9-11	Normal(n=712)	5.30107	NA	NA
TCGA-EL-A3ZL-11	Normal(n=712)	5.44361	NA	NA
TCGA-EL-A3GZ-11	Normal(n=712)	5.78171	NA	NA
TCGA-EL-A3ZK-11	Normal(n=712)	5.07922	NA	NA
GTEX-111CU-0226-SM-5GZXC	Normal(n=712)	4.32769	NA	NA
GTEX-111FC-1026-SM-5GZX1	Normal(n=712)	4.40667	NA	NA
GTEX-111VG-0526-SM-5N9BW	Normal(n=712)	3.49953	NA	NA
GTEX-111YS-0726-SM-5GZY8	Normal(n=712)	4.11853	NA	NA
GTEX-1122O-0226-SM-5N9DA	Normal(n=712)	3.9782	NA	NA
GTEX-1128S-0126-SM-5H12S	Normal(n=712)	3.84298	NA	NA
GTEX-113JC-0126-SM-5EGJW	Normal(n=712)	4.15704	NA	NA
GTEX-117XS-0526-SM-5987Q	Normal(n=712)	4.86344	NA	NA
GTEX-117YW-0126-SM-5EGGN	Normal(n=712)	4.08321	NA	NA
GTEX-117YX-1226-SM-5H11S	Normal(n=712)	4.60407	NA	NA
GTEX-1192W-0126-SM-5EGGS	Normal(n=712)	4.43829	NA	NA
GTEX-1192X-1126-SM-5EGGU	Normal(n=712)	4.6893	NA	NA
GTEX-11DXX-0226-SM-5P9HL	Normal(n=712)	4.0993	NA	NA
GTEX-11DXY-0426-SM-5H12R	Normal(n=712)	3.93734	NA	NA
GTEX-11DXZ-0926-SM-5N9CG	Normal(n=712)	4.41684	NA	NA
GTEX-11DYG-0826-SM-5N9GH	Normal(n=712)	4.31107	NA	NA
GTEX-11DZ1-2726-SM-5A5KH	Normal(n=712)	4.7866	NA	NA
GTEX-11EI6-0726-SM-59866	Normal(n=712)	4.72356	NA	NA
GTEX-11EM3-0126-SM-5985K	Normal(n=712)	4.14975	NA	NA
GTEX-11EMC-0226-SM-5EGLP	Normal(n=712)	4.16269	NA	NA
GTEX-11EQ8-0826-SM-5N9FG	Normal(n=712)	5.06652	NA	NA
GTEX-11EQ9-0626-SM-5A5K1	Normal(n=712)	4.19298	NA	NA
GTEX-11GS4-0826-SM-5986J	Normal(n=712)	3.52482	NA	NA
GTEX-11GSO-0626-SM-5A5LW	Normal(n=712)	4.73769	NA	NA
GTEX-11GSP-0126-SM-5A5KU	Normal(n=712)	3.72028	NA	NA
GTEX-11I78-0526-SM-5986A	Normal(n=712)	4.3505	NA	NA
GTEX-11LCK-0526-SM-5A5M9	Normal(n=712)	3.82375	NA	NA
GTEX-11NSD-0126-SM-5987F	Normal(n=712)	4.96209	NA	NA
GTEX-11NUK-1026-SM-5HL5J	Normal(n=712)	4.17712	NA	NA
GTEX-11NV4-0626-SM-5N9BR	Normal(n=712)	4.41075	NA	NA
GTEX-11O72-2326-SM-5BC7H	Normal(n=712)	4.21257	NA	NA
GTEX-11OF3-0626-SM-5BC4Y	Normal(n=712)	4.66505	NA	NA
GTEX-11P7K-0226-SM-5986Z	Normal(n=712)	4.5656	NA	NA
GTEX-11P81-0126-SM-5HL5Y	Normal(n=712)	4.55152	NA	NA
GTEX-11P82-0226-SM-5HL4O	Normal(n=712)	4.29793	NA	NA
GTEX-11TT1-1126-SM-5P9GV	Normal(n=712)	4.40803	NA	NA
GTEX-11TTK-0826-SM-5N9EG	Normal(n=712)	4.29646	NA	NA
GTEX-11TUW-0226-SM-5LU8X	Normal(n=712)	4.13093	NA	NA
GTEX-11UD2-0626-SM-5GU6L	Normal(n=712)	4.32193	NA	NA
GTEX-11VI4-0226-SM-5GU6C	Normal(n=712)	4.22805	NA	NA
GTEX-11XUK-0226-SM-5EQLW	Normal(n=712)	4.59932	NA	NA
GTEX-11ZTS-1126-SM-5LU9X	Normal(n=712)	4.04439	NA	NA
GTEX-11ZTT-1026-SM-5EQKF	Normal(n=712)	4.30743	NA	NA
GTEX-11ZVC-0126-SM-5986G	Normal(n=712)	4.56377	NA	NA
GTEX-1211K-0726-SM-5FQUW	Normal(n=712)	4.40735	NA	NA
GTEX-1212Z-0426-SM-5FQT6	Normal(n=712)	4.48285	NA	NA
GTEX-12584-0826-SM-5FQSK	Normal(n=712)	4.13996	NA	NA
GTEX-12696-0326-SM-5EGL4	Normal(n=712)	4.36387	NA	NA
GTEX-1269C-0226-SM-5EGKS	Normal(n=712)	3.60881	NA	NA
GTEX-12BJ1-0426-SM-5FQSO	Normal(n=712)	4.2149	NA	NA
GTEX-12WSC-0826-SM-5EQ5Q	Normal(n=712)	4.21956	NA	NA
GTEX-12WSD-0926-SM-5GCNL	Normal(n=712)	4.24793	NA	NA
GTEX-12WSE-1226-SM-73KUF	Normal(n=712)	4.60051	NA	NA
GTEX-12WSG-0226-SM-5EGIF	Normal(n=712)	3.8268	NA	NA
GTEX-12WSH-0226-SM-5GCOG	Normal(n=712)	4.61883	NA	NA
GTEX-12WSJ-0326-SM-5GCMT	Normal(n=712)	3.88753	NA	NA
GTEX-12WSK-0926-SM-5CVNQ	Normal(n=712)	4.20555	NA	NA
GTEX-12WSL-0626-SM-5GCOY	Normal(n=712)	4.33271	NA	NA
GTEX-12WSN-0726-SM-5GCMS	Normal(n=712)	4.02059	NA	NA
GTEX-12ZZX-1226-SM-5EGHS	Normal(n=712)	4.60526	NA	NA
GTEX-12ZZY-0826-SM-5EQMT	Normal(n=712)	4.22342	NA	NA
GTEX-12ZZZ-1226-SM-59HK1	Normal(n=712)	4.36737	NA	NA
GTEX-13111-0226-SM-5EQ55	Normal(n=712)	3.77294	NA	NA
GTEX-13112-0326-SM-5P9IW	Normal(n=712)	4.57289	NA	NA
GTEX-13113-0126-SM-5LZVX	Normal(n=712)	4.11853	NA	NA
GTEX-1313W-0726-SM-5EGK1	Normal(n=712)	4.39575	NA	NA
GTEX-131XE-0126-SM-5LZVC	Normal(n=712)	4.41346	NA	NA
GTEX-131XF-1826-SM-5EGKG	Normal(n=712)	4.49953	NA	NA
GTEX-131XG-0226-SM-5IFG1	Normal(n=712)	4.50526	NA	NA
GTEX-131XH-0526-SM-5DUX7	Normal(n=712)	4.08151	NA	NA
GTEX-131YS-0726-SM-5P9G9	Normal(n=712)	4.29057	NA	NA
GTEX-132AR-1126-SM-5P9GA	Normal(n=712)	4.76924	NA	NA
GTEX-132NY-1026-SM-5P9IY	Normal(n=712)	4.00899	NA	NA
GTEX-132QS-0326-SM-5IJFN	Normal(n=712)	4.28762	NA	NA
GTEX-133LE-0326-SM-5P9G4	Normal(n=712)	3.83693	NA	NA
GTEX-1399R-0126-SM-5IFEV	Normal(n=712)	4.60585	NA	NA
GTEX-1399T-0126-SM-5KM15	Normal(n=712)	4.18587	NA	NA
GTEX-1399U-0326-SM-5P9G5	Normal(n=712)	4.4019	NA	NA
GTEX-139T6-0326-SM-5J2LY	Normal(n=712)	4.24565	NA	NA
GTEX-139TS-0126-SM-5K7XJ	Normal(n=712)	4.28466	NA	NA
GTEX-139UW-0126-SM-5KM1B	Normal(n=712)	3.75809	NA	NA
GTEX-139YR-1226-SM-5IFEU	Normal(n=712)	4.56377	NA	NA
GTEX-13CF3-0926-SM-5LZZC	Normal(n=712)	3.81352	NA	NA
GTEX-13D11-0226-SM-5LZXL	Normal(n=712)	4.44758	NA	NA
GTEX-13FH7-0126-SM-5KLZ1	Normal(n=712)	4.12267	NA	NA
GTEX-13FHO-0926-SM-5N9EW	Normal(n=712)	3.80632	NA	NA
GTEX-13FHP-0926-SM-5L3EC	Normal(n=712)	4.04264	NA	NA
GTEX-13FLV-0226-SM-5J2OF	Normal(n=712)	4.51728	NA	NA
GTEX-13FLW-0326-SM-5J2M4	Normal(n=712)	4.29646	NA	NA
GTEX-13FTW-0626-SM-5IFEX	Normal(n=712)	4.488	NA	NA
GTEX-13FTY-0726-SM-5J2OH	Normal(n=712)	4.45943	NA	NA
GTEX-13FXS-0726-SM-5LZXJ	Normal(n=712)	4.04789	NA	NA
GTEX-13G51-1226-SM-5K7Z3	Normal(n=712)	4.03474	NA	NA
GTEX-13IVO-0926-SM-5KLZP	Normal(n=712)	5.28392	NA	NA
GTEX-13JVG-0926-SM-5IJE1	Normal(n=712)	4.55704	NA	NA
GTEX-13N11-1026-SM-5K7XQ	Normal(n=712)	4.54597	NA	NA
GTEX-13N1W-0826-SM-5MR5J	Normal(n=712)	4.37643	NA	NA
GTEX-13N2G-0726-SM-5MR38	Normal(n=712)	4.48414	NA	NA
GTEX-13NYB-0726-SM-5MR4J	Normal(n=712)	4.37365	NA	NA
GTEX-13NYC-2426-SM-5MR3K	Normal(n=712)	4.47962	NA	NA
GTEX-13NZ8-0226-SM-5J2OK	Normal(n=712)	5.24755	NA	NA
GTEX-13NZ9-1126-SM-5MR37	Normal(n=712)	4.47573	NA	NA
GTEX-13NZA-1026-SM-5MR48	Normal(n=712)	3.85898	NA	NA
GTEX-13O1R-0826-SM-5J2MB	Normal(n=712)	4.33628	NA	NA
GTEX-13O21-2226-SM-5MR3L	Normal(n=712)	4.0321	NA	NA
GTEX-13O3O-0926-SM-5KM1F	Normal(n=712)	3.73877	NA	NA
GTEX-13O3P-0726-SM-5J2OM	Normal(n=712)	3.6837	NA	NA
GTEX-13O3Q-0626-SM-5IJG1	Normal(n=712)	4.337	NA	NA
GTEX-13O61-0226-SM-5KM52	Normal(n=712)	4.39094	NA	NA
GTEX-13OVG-0226-SM-5LU93	Normal(n=712)	3.84499	NA	NA
GTEX-13OVI-0826-SM-5KLZ8	Normal(n=712)	3.91743	NA	NA
GTEX-13OVJ-0626-SM-5J2O2	Normal(n=712)	3.88753	NA	NA
GTEX-13OVK-0226-SM-6M472	Normal(n=712)	4.77716	NA	NA
GTEX-13OW5-0626-SM-5J2N2	Normal(n=712)	4.59156	NA	NA
GTEX-13OW6-0726-SM-5L3FX	Normal(n=712)	4.55152	NA	NA
GTEX-13OW7-0826-SM-5L3EL	Normal(n=712)	4.19771	NA	NA
GTEX-13OW8-0126-SM-5IJE5	Normal(n=712)	3.85	NA	NA
GTEX-13PDP-1026-SM-5L3FA	Normal(n=712)	4.61176	NA	NA
GTEX-13PL6-1026-SM-5L3E5	Normal(n=712)	4.74147	NA	NA
GTEX-13PVQ-0726-SM-5L3GI	Normal(n=712)	3.71918	NA	NA
GTEX-13PVR-0626-SM-5S2RC	Normal(n=712)	4.05832	NA	NA
GTEX-13QBU-0626-SM-5J2OG	Normal(n=712)	3.95977	NA	NA
GTEX-13QJ3-0926-SM-73KX5	Normal(n=712)	4.64731	NA	NA
GTEX-13QJC-0826-SM-5RQKC	Normal(n=712)	4.0365	NA	NA
GTEX-13RTJ-0326-SM-5YYAE	Normal(n=712)	4.24869	NA	NA
GTEX-13RTK-0326-SM-5RQHS	Normal(n=712)	3.98094	NA	NA
GTEX-13S86-1126-SM-5RQJX	Normal(n=712)	4.44626	NA	NA
GTEX-13U4I-0526-SM-5LU59	Normal(n=712)	4.4121	NA	NA
GTEX-13VXT-0626-SM-5SIA1	Normal(n=712)	4.62117	NA	NA
GTEX-13VXU-0826-SM-5KLZ2	Normal(n=712)	4.14078	NA	NA
GTEX-13W46-0926-SM-5LU3T	Normal(n=712)	4.44956	NA	NA
GTEX-13X6H-0526-SM-5LU4Q	Normal(n=712)	4.08321	NA	NA
GTEX-13X6J-0826-SM-5LU32	Normal(n=712)	4.38819	NA	NA
GTEX-13YAN-0926-SM-5O9C3	Normal(n=712)	3.75916	NA	NA
GTEX-144GL-1226-SM-5O9A4	Normal(n=712)	4.64559	NA	NA
GTEX-144GM-0226-SM-5Q5CB	Normal(n=712)	3.89918	NA	NA
GTEX-144GO-0126-SM-5LUAO	Normal(n=712)	4.74739	NA	NA
GTEX-145LT-0226-SM-5S2QK	Normal(n=712)	4.09677	NA	NA
GTEX-145LU-0426-SM-5O9AH	Normal(n=712)	3.65306	NA	NA
GTEX-145ME-0126-SM-5S2QM	Normal(n=712)	3.77926	NA	NA
GTEX-145MG-0826-SM-5Q5C2	Normal(n=712)	4.72792	NA	NA
GTEX-145MH-0426-SM-5LU8T	Normal(n=712)	4.53481	NA	NA
GTEX-145MI-1126-SM-5O9AK	Normal(n=712)	5.07767	NA	NA
GTEX-146FQ-0726-SM-5LUA7	Normal(n=712)	4.35896	NA	NA
GTEX-146FR-0326-SM-5SI8U	Normal(n=712)	4.37504	NA	NA
GTEX-14753-0926-SM-5Q5BI	Normal(n=712)	4.3512	NA	NA
GTEX-1477Z-0226-SM-5TDCI	Normal(n=712)	4.06091	NA	NA
GTEX-147F4-0826-SM-5QGRB	Normal(n=712)	4.10266	NA	NA
GTEX-147GR-0726-SM-5S2PL	Normal(n=712)	4.37016	NA	NA
GTEX-148VI-0526-SM-5TDDG	Normal(n=712)	3.86394	NA	NA
GTEX-148VJ-0726-SM-5LU8J	Normal(n=712)	3.77821	NA	NA
GTEX-1497J-0126-SM-5Q5BK	Normal(n=712)	3.9991	NA	NA
GTEX-14A5H-0726-SM-5Q5DW	Normal(n=712)	3.58616	NA	NA
GTEX-14A6H-2426-SM-5Q5BO	Normal(n=712)	4.59694	NA	NA
GTEX-14ABY-0926-SM-5Q5DY	Normal(n=712)	4.64328	NA	NA
GTEX-14AS3-0226-SM-5Q5B6	Normal(n=712)	4.42156	NA	NA
GTEX-14ASI-0726-SM-5Q5DC	Normal(n=712)	4.49313	NA	NA
GTEX-14B4R-0126-SM-5TDE4	Normal(n=712)	4.18031	NA	NA
GTEX-14BIN-0126-SM-5TDCG	Normal(n=712)	3.91743	NA	NA
GTEX-14BMU-0226-SM-5S2QA	Normal(n=712)	4.58015	NA	NA
GTEX-14BMV-0726-SM-73KVE	Normal(n=712)	3.97085	NA	NA
GTEX-14C38-0826-SM-5S2U8	Normal(n=712)	3.92884	NA	NA
GTEX-14C39-0226-SM-5TDDW	Normal(n=712)	4.25776	NA	NA
GTEX-14C5O-0826-SM-5TDEG	Normal(n=712)	4.07039	NA	NA
GTEX-14DAQ-0826-SM-73KWT	Normal(n=712)	3.99729	NA	NA
GTEX-14E6C-2626-SM-5RQJP	Normal(n=712)	3.854	NA	NA
GTEX-14E6E-0326-SM-73KY6	Normal(n=712)	4.20398	NA	NA
GTEX-14E7W-0926-SM-5YYA4	Normal(n=712)	4.45615	NA	NA
GTEX-14ICK-1626-SM-6ETZX	Normal(n=712)	3.51223	NA	NA
GTEX-14ICL-0426-SM-5RQJ3	Normal(n=712)	4.64328	NA	NA
GTEX-14JG6-1326-SM-9OSXU	Normal(n=712)	4.3799	NA	NA
GTEX-14JIY-1226-SM-6871R	Normal(n=712)	4.21956	NA	NA
GTEX-14PHW-2926-SM-6AJBA	Normal(n=712)	4.18824	NA	NA
GTEX-14PII-0826-SM-6871S	Normal(n=712)	4.62585	NA	NA
GTEX-14PJ3-0126-SM-69LQP	Normal(n=712)	4.38128	NA	NA
GTEX-14PJ4-0326-SM-664OT	Normal(n=712)	4.27575	NA	NA
GTEX-14PJ6-0326-SM-6871H	Normal(n=712)	3.92695	NA	NA
GTEX-14PJM-1326-SM-664NX	Normal(n=712)	3.78031	NA	NA
GTEX-14PJO-0626-SM-6LLHH	Normal(n=712)	3.86691	NA	NA
GTEX-14PK6-0426-SM-6EU1J	Normal(n=712)	4.5435	NA	NA
GTEX-14PKU-0326-SM-6AJA7	Normal(n=712)	4.50016	NA	NA
GTEX-14PKV-0626-SM-6AJA2	Normal(n=712)	4.03914	NA	NA
GTEX-14PN3-0826-SM-69LOS	Normal(n=712)	4.34696	NA	NA
GTEX-14PN4-1526-SM-6871V	Normal(n=712)	3.93829	NA	NA
GTEX-14PQA-1226-SM-6M47A	Normal(n=712)	4.45286	NA	NA
GTEX-14XAO-0426-SM-6AJB6	Normal(n=712)	4.27947	NA	NA
GTEX-15CHC-0126-SM-5YYBA	Normal(n=712)	3.82985	NA	NA
GTEX-15CHQ-0826-SM-69LOT	Normal(n=712)	4.81711	NA	NA
GTEX-15CHR-1726-SM-7DUGW	Normal(n=712)	4.69321	NA	NA
GTEX-15D1Q-0626-SM-6AJAZ	Normal(n=712)	4.44294	NA	NA
GTEX-15DDE-0626-SM-69LOK	Normal(n=712)	5.3147	NA	NA
GTEX-15DZA-0226-SM-7KFS6	Normal(n=712)	4.25323	NA	NA
GTEX-15EO6-0126-SM-6LPKJ	Normal(n=712)	4.73931	NA	NA
GTEX-15ER7-0726-SM-7KUMF	Normal(n=712)	4.29939	NA	NA
GTEX-15ETS-0526-SM-6PAN3	Normal(n=712)	4.27277	NA	NA
GTEX-15EU6-1426-SM-6M48E	Normal(n=712)	4.4019	NA	NA
GTEX-15FZZ-0226-SM-6LLI4	Normal(n=712)	3.7148	NA	NA
GTEX-15G19-0626-SM-6M474	Normal(n=712)	4.17871	NA	NA
GTEX-15G1A-0326-SM-6M467	Normal(n=712)	4.20006	NA	NA
GTEX-15RIE-0426-SM-7KUMH	Normal(n=712)	4.88947	NA	NA
GTEX-15RIF-0326-SM-7KUFR	Normal(n=712)	4.09677	NA	NA
GTEX-15RJ7-0326-SM-6M47H	Normal(n=712)	4.49889	NA	NA
GTEX-15RJE-1326-SM-6LPI6	Normal(n=712)	3.68818	NA	NA
GTEX-15SB6-1526-SM-7KUMQ	Normal(n=712)	4.64097	NA	NA
GTEX-15SHU-0726-SM-7KUFI	Normal(n=712)	4.41007	NA	NA
GTEX-15SHV-0426-SM-6M476	Normal(n=712)	4.39163	NA	NA
GTEX-15UF6-1126-SM-6LPJ3	Normal(n=712)	4.47573	NA	NA
GTEX-169BO-0326-SM-7EPIM	Normal(n=712)	4.41616	NA	NA
GTEX-16AAH-0326-SM-7DHML	Normal(n=712)	4.2032	NA	NA
GTEX-16BQI-0726-SM-6LPJZ	Normal(n=712)	4.23496	NA	NA
GTEX-16GPK-0926-SM-6LPJ9	Normal(n=712)	4.20085	NA	NA
GTEX-16MT8-0626-SM-6M47Q	Normal(n=712)	3.89627	NA	NA
GTEX-16MTA-0726-SM-7KUL4	Normal(n=712)	4.34696	NA	NA
GTEX-16NGA-0326-SM-718AJ	Normal(n=712)	4.64789	NA	NA
GTEX-16NPX-1426-SM-6LPK3	Normal(n=712)	4.13586	NA	NA
GTEX-16XZY-0726-SM-79OMU	Normal(n=712)	4.337	NA	NA
GTEX-16XZZ-0826-SM-7IGM3	Normal(n=712)	4.56194	NA	NA
GTEX-16YQH-0326-SM-6LPJV	Normal(n=712)	4.51979	NA	NA
GTEX-16Z82-0426-SM-7EPGX	Normal(n=712)	4.47314	NA	NA
GTEX-178AV-0726-SM-6LPJI	Normal(n=712)	4.37365	NA	NA
GTEX-17EVP-0126-SM-7EPHW	Normal(n=712)	4.06437	NA	NA
GTEX-17EVQ-0526-SM-7KFSK	Normal(n=712)	4.28836	NA	NA
GTEX-17F96-0526-SM-79OLE	Normal(n=712)	4.63517	NA	NA
GTEX-17F97-0626-SM-7IGOH	Normal(n=712)	4.68538	NA	NA
GTEX-17F9E-0626-SM-79ON5	Normal(n=712)	4.02768	NA	NA
GTEX-17F9Y-0526-SM-7EWDC	Normal(n=712)	4.79286	NA	NA
GTEX-17GQL-0226-SM-7LTAK	Normal(n=712)	4.17473	NA	NA
GTEX-17HG3-0226-SM-7EWEA	Normal(n=712)	4.34483	NA	NA
GTEX-17HGU-0826-SM-7EWE5	Normal(n=712)	4.36247	NA	NA
GTEX-17HHE-0426-SM-79OK3	Normal(n=712)	4.79961	NA	NA
GTEX-17HHY-0826-SM-7EPID	Normal(n=712)	4.42223	NA	NA
GTEX-17HII-1926-SM-79OLB	Normal(n=712)	4.45549	NA	NA
GTEX-17JCI-0626-SM-7IGM7	Normal(n=712)	4.1643	NA	NA
GTEX-17KNJ-1026-SM-79ONK	Normal(n=712)	4.7366	NA	NA
GTEX-17MF6-0626-SM-7LT8D	Normal(n=712)	3.80735	NA	NA
GTEX-183FY-0626-SM-79OKR	Normal(n=712)	4.25096	NA	NA
GTEX-183WM-2626-SM-7KFRY	Normal(n=712)	4.35896	NA	NA
GTEX-18465-1426-SM-7KFTF	Normal(n=712)	4.67807	NA	NA
GTEX-18A66-0826-SM-72D5Z	Normal(n=712)	4.55275	NA	NA
GTEX-18A67-0826-SM-7KFTI	Normal(n=712)	4.24184	NA	NA
GTEX-18A6Q-0726-SM-7LT8Y	Normal(n=712)	3.94673	NA	NA
GTEX-18A7A-0826-SM-7KFTJ	Normal(n=712)	4.57289	NA	NA
GTEX-18D9A-0126-SM-7KFSI	Normal(n=712)	4.37156	NA	NA
GTEX-18D9B-0726-SM-72D6K	Normal(n=712)	3.6241	NA	NA
GTEX-18D9U-1026-SM-72D5R	Normal(n=712)	4.25172	NA	NA
GTEX-18QFQ-0726-SM-7LG6D	Normal(n=712)	4.30086	NA	NA
GTEX-1A3MV-0326-SM-73KW7	Normal(n=712)	4.21257	NA	NA
GTEX-1A8FM-0726-SM-7DUGK	Normal(n=712)	4.28983	NA	NA
GTEX-1A8G6-0626-SM-7IGNB	Normal(n=712)	4.1035	NA	NA
GTEX-1A8G7-1026-SM-73KVA	Normal(n=712)	4.13996	NA	NA
GTEX-1AMEY-0126-SM-73KTX	Normal(n=712)	3.63807	NA	NA
GTEX-1AMFI-0526-SM-7189M	Normal(n=712)	4.58135	NA	NA
GTEX-1AX8Z-0826-SM-7DUFZ	Normal(n=712)	4.20398	NA	NA
GTEX-1AX9I-0626-SM-72D54	Normal(n=712)	4.35755	NA	NA
GTEX-1AX9J-2126-SM-731DD	Normal(n=712)	3.854	NA	NA
GTEX-1AX9K-0626-SM-73KVD	Normal(n=712)	4.35826	NA	NA
GTEX-1AYCT-0226-SM-73KVB	Normal(n=712)	4.63633	NA	NA
GTEX-1B8KE-0626-SM-7189H	Normal(n=712)	4.34412	NA	NA
GTEX-1B8KZ-0426-SM-731DP	Normal(n=712)	4.72083	NA	NA
GTEX-1B8L1-1626-SM-7IGMH	Normal(n=712)	4.51475	NA	NA
GTEX-1B8SF-0626-SM-73KVV	Normal(n=712)	4.04439	NA	NA
GTEX-1B8SG-1126-SM-7IGMT	Normal(n=712)	4.53107	NA	NA
GTEX-1B932-0926-SM-73KUP	Normal(n=712)	4.54288	NA	NA
GTEX-1B933-1026-SM-7P8RO	Normal(n=712)	4.29866	NA	NA
GTEX-1B97I-0326-SM-7DUGB	Normal(n=712)	4.35332	NA	NA
GTEX-1B97J-0626-SM-7P8RU	Normal(n=712)	4.66334	NA	NA
GTEX-1BAJH-0926-SM-79OO6	Normal(n=712)	4.64616	NA	NA
GTEX-1C2JI-0326-SM-7EWFD	Normal(n=712)	3.95606	NA	NA
GTEX-1C475-0226-SM-7MGXM	Normal(n=712)	3.97269	NA	NA
GTEX-1C4CL-0726-SM-7IGP9	Normal(n=712)	4.55397	NA	NA
GTEX-1C64N-1026-SM-79ONM	Normal(n=712)	4.63807	NA	NA
GTEX-1C6VQ-0526-SM-7MGWD	Normal(n=712)	4.40599	NA	NA
GTEX-1C6VR-0426-SM-7IGN6	Normal(n=712)	4.5735	NA	NA
GTEX-1C6VS-0826-SM-7EWEI	Normal(n=712)	4.87971	NA	NA
GTEX-1CAMQ-1126-SM-7EWFE	Normal(n=712)	3.852	NA	NA
GTEX-1CAMR-0226-SM-7DUGO	Normal(n=712)	4.44824	NA	NA
GTEX-1CAMS-0826-SM-7P8P1	Normal(n=712)	4.11353	NA	NA
GTEX-1CB4E-0326-SM-7MXT3	Normal(n=712)	3.84097	NA	NA
GTEX-1CB4F-0826-SM-793CV	Normal(n=712)	4.79701	NA	NA
GTEX-1CB4G-1526-SM-7P8QG	Normal(n=712)	4.46923	NA	NA
GTEX-1CB4H-0126-SM-7IGN2	Normal(n=712)	4.43962	NA	NA
GTEX-1CB4I-0726-SM-7DUGS	Normal(n=712)	4.65421	NA	NA
GTEX-1CB4J-1426-SM-7MKFR	Normal(n=712)	3.853	NA	NA
GTEX-1E1VI-0726-SM-7P8QJ	Normal(n=712)	4.48478	NA	NA
GTEX-1EH9U-0926-SM-7EWF1	Normal(n=712)	4.04876	NA	NA
GTEX-1EKGG-0726-SM-7IGPX	Normal(n=712)	4.00809	NA	NA
GTEX-1EMGI-0826-SM-7EPHY	Normal(n=712)	4.67976	NA	NA
GTEX-1EN7A-1026-SM-7IGPZ	Normal(n=712)	3.9364	NA	NA
GTEX-1EU9M-0626-SM-7MXUT	Normal(n=712)	4.16269	NA	NA
GTEX-1EWIQ-0826-SM-7MXTH	Normal(n=712)	4.66334	NA	NA
GTEX-1EX96-0126-SM-9KNVH	Normal(n=712)	4.63923	NA	NA
GTEX-1F48J-0926-SM-7P8PZ	Normal(n=712)	3.90014	NA	NA
GTEX-1F52S-0526-SM-7P8TP	Normal(n=712)	4.9364	NA	NA
GTEX-1F5PL-0826-SM-7MXU7	Normal(n=712)	4.38681	NA	NA
GTEX-1F6IF-1126-SM-9KNV2	Normal(n=712)	4.32553	NA	NA
GTEX-1F75A-0326-SM-7MXTR	Normal(n=712)	4.9397	NA	NA
GTEX-1F75B-0826-SM-9QEIT	Normal(n=712)	4.25475	NA	NA
GTEX-1F75I-0926-SM-7MXUU	Normal(n=712)	3.86394	NA	NA
GTEX-1F88F-0726-SM-7P8R7	Normal(n=712)	3.81762	NA	NA
GTEX-1FIGZ-0226-SM-7P8QR	Normal(n=712)	4.43763	NA	NA
GTEX-1GF9U-0226-SM-7P8TY	Normal(n=712)	4.20006	NA	NA
GTEX-1GF9V-0926-SM-9KNW7	Normal(n=712)	4.24413	NA	NA
GTEX-1GF9W-0626-SM-7MXVJ	Normal(n=712)	4.44228	NA	NA
GTEX-1GF9X-0126-SM-A9G38	Normal(n=712)	4.48027	NA	NA
GTEX-1GL5R-0626-SM-7PBZY	Normal(n=712)	4.04701	NA	NA
GTEX-1GMR3-0726-SM-9WPOF	Normal(n=712)	4.69988	NA	NA
GTEX-1GMR8-0826-SM-9KNUR	Normal(n=712)	4.71425	NA	NA
GTEX-1GMRU-1126-SM-9KNV1	Normal(n=712)	4.34554	NA	NA
GTEX-1GN1U-0826-SM-9WPPX	Normal(n=712)	3.93546	NA	NA
GTEX-1GN1V-0626-SM-7P8QU	Normal(n=712)	4.40599	NA	NA
GTEX-1GN1W-0126-SM-7MXV7	Normal(n=712)	4.18903	NA	NA
GTEX-1GN2E-0826-SM-9WYT8	Normal(n=712)	4.28688	NA	NA
GTEX-1GN73-0826-SM-9OSW4	Normal(n=712)	3.92979	NA	NA
GTEX-1GPI7-0726-SM-9WG84	Normal(n=712)	4.39232	NA	NA
GTEX-1GTWX-0726-SM-9WPPA	Normal(n=712)	3.7366	NA	NA
GTEX-1GZ2Q-0826-SM-7P8TK	Normal(n=712)	4.75168	NA	NA
GTEX-1GZ4H-0226-SM-9JGGJ	Normal(n=712)	3.32005	NA	NA
GTEX-1GZ4I-0626-SM-9WPPN	Normal(n=712)	3.9982	NA	NA
GTEX-1GZHY-1426-SM-9WG5H	Normal(n=712)	4.13093	NA	NA
GTEX-1H11D-0626-SM-9WPQ1	Normal(n=712)	4.24641	NA	NA
GTEX-1H1CY-0726-SM-9OSXX	Normal(n=712)	3.97636	NA	NA
GTEX-1H1DE-0226-SM-ARZN8	Normal(n=712)	3.43162	NA	NA
GTEX-1H1DF-1026-SM-9QEJ1	Normal(n=712)	4.43095	NA	NA
GTEX-1H1DG-0726-SM-A96TN	Normal(n=712)	4.01346	NA	NA
GTEX-1H1E6-0326-SM-9OSWE	Normal(n=712)	4.37016	NA	NA
GTEX-1H1ZS-0726-SM-A9G3K	Normal(n=712)	4.39575	NA	NA
GTEX-1H2FU-0626-SM-9WPPS	Normal(n=712)	4.29866	NA	NA
GTEX-1H3VE-0826-SM-9KNVQ	Normal(n=712)	4.96901	NA	NA
GTEX-1HB9E-0826-SM-CNNQJ	Normal(n=712)	4.47379	NA	NA
GTEX-1HBPH-0926-SM-A9SME	Normal(n=712)	4.32697	NA	NA
GTEX-1HBPI-0826-SM-9WYTX	Normal(n=712)	4.14731	NA	NA
GTEX-1HBPM-0926-SM-ARL9C	Normal(n=712)	3.86987	NA	NA
GTEX-1HBPN-1226-SM-B2LW9	Normal(n=712)	3.98368	NA	NA
GTEX-1HC8U-1226-SM-9WYUW	Normal(n=712)	3.79909	NA	NA
GTEX-1HCU7-0826-SM-B2LX7	Normal(n=712)	4.7148	NA	NA
GTEX-1HCU9-0226-SM-9WPNT	Normal(n=712)	4.60051	NA	NA
GTEX-1HCUA-0126-SM-B2LWC	Normal(n=712)	4.36177	NA	NA
GTEX-1HCVE-0726-SM-A96SH	Normal(n=712)	4.26379	NA	NA
GTEX-1HFI6-1326-SM-A9SL8	Normal(n=712)	4.4121	NA	NA
GTEX-1HFI7-0326-SM-9WPOX	Normal(n=712)	4.2765	NA	NA
GTEX-1HGF4-0726-SM-9WYU9	Normal(n=712)	3.82171	NA	NA
GTEX-1HKZK-0826-SM-A9G2C	Normal(n=712)	4.42962	NA	NA
GTEX-1HR98-0326-SM-CGQEL	Normal(n=712)	4.69599	NA	NA
GTEX-1HR9M-0626-SM-A96S6	Normal(n=712)	4.60703	NA	NA
GTEX-1HSEH-0826-SM-B2LXE	Normal(n=712)	4.27947	NA	NA
GTEX-1HSGN-0726-SM-A9G2F	Normal(n=712)	4.17712	NA	NA
GTEX-1HSKV-1026-SM-B2LWK	Normal(n=712)	4.10098	NA	NA
GTEX-1HSMO-0726-SM-A96TM	Normal(n=712)	4.6565	NA	NA
GTEX-1HSMQ-0526-SM-A96TY	Normal(n=712)	4.49506	NA	NA
GTEX-1HT8W-1526-SM-CE6S3	Normal(n=712)	4.56925	NA	NA
GTEX-1HUB1-1226-SM-B2LWX	Normal(n=712)	4.06264	NA	NA
GTEX-1I19N-0226-SM-CE6ST	Normal(n=712)	4.63052	NA	NA
GTEX-1I1GP-0326-SM-CNPQ4	Normal(n=712)	3.6427	NA	NA
GTEX-1I1GQ-0826-SM-CNNQR	Normal(n=712)	4.11437	NA	NA
GTEX-1I1GR-1126-SM-A9G2I	Normal(n=712)	4.58736	NA	NA
GTEX-1I1GS-0726-SM-C1YS7	Normal(n=712)	3.83693	NA	NA
GTEX-1I1GT-0826-SM-B2LWO	Normal(n=712)	4.24031	NA	NA
GTEX-1I1GU-0826-SM-ARZM5	Normal(n=712)	4.38819	NA	NA
GTEX-1I1GV-0726-SM-ARZLY	Normal(n=712)	4.3799	NA	NA
GTEX-1I6K6-0726-SM-B2LX4	Normal(n=712)	4.72955	NA	NA
GTEX-1I6K7-1126-SM-A96SW	Normal(n=712)	4.62936	NA	NA
GTEX-1ICG6-0426-SM-ARU7M	Normal(n=712)	3.77926	NA	NA
GTEX-1ICLY-0726-SM-A96TB	Normal(n=712)	3.80941	NA	NA
GTEX-1ICLZ-0526-SM-ARZM8	Normal(n=712)	4.32984	NA	NA
GTEX-1IDJC-1026-SM-A96T2	Normal(n=712)	3.95606	NA	NA
GTEX-1IDJH-0826-SM-CE6SY	Normal(n=712)	3.56682	NA	NA
GTEX-1IDJU-1626-SM-CJI4B	Normal(n=712)	4.60229	NA	NA
GTEX-1IE54-0926-SM-A9G2Y	Normal(n=712)	4.57168	NA	NA
GTEX-1IGQW-0626-SM-C1YR9	Normal(n=712)	5.06523	NA	NA
GTEX-1IKJJ-1026-SM-A96SQ	Normal(n=712)	3.57894	NA	NA
GTEX-1IKOE-0926-SM-ARU7X	Normal(n=712)	4.40939	NA	NA
GTEX-1IKOH-0626-SM-CJI35	Normal(n=712)	4.13422	NA	NA
GTEX-1IL2U-0826-SM-CL53Q	Normal(n=712)	3.8268	NA	NA
GTEX-1IL2V-0626-SM-ARU7S	Normal(n=712)	4.46205	NA	NA
GTEX-1IOXB-1026-SM-CJI4D	Normal(n=712)	3.7939	NA	NA
GTEX-1IY9M-1026-SM-A96TG	Normal(n=712)	4.40735	NA	NA
GTEX-1J1OQ-0526-SM-A9G2P	Normal(n=712)	4.4822	NA	NA
GTEX-1J1R8-0126-SM-CJI36	Normal(n=712)	3.88557	NA	NA
GTEX-1J8EW-1126-SM-A96T8	Normal(n=712)	3.69153	NA	NA
GTEX-1J8JJ-0726-SM-AHZ3E	Normal(n=712)	4.17153	NA	NA
GTEX-1J8Q3-0226-SM-C1YR4	Normal(n=712)	4.60407	NA	NA
GTEX-1J8QM-0726-SM-CE6RF	Normal(n=712)	4.0197	NA	NA
GTEX-1JJ6O-0626-SM-AHZ3H	Normal(n=712)	3.44546	NA	NA
GTEX-1JJE9-0226-SM-CY8HU	Normal(n=712)	4.54535	NA	NA
GTEX-1JJEA-0626-SM-D3L96	Normal(n=712)	4.29278	NA	NA
GTEX-1JK1U-0326-SM-CXZJH	Normal(n=712)	4.29057	NA	NA
GTEX-1JKYN-1126-SM-CGQG5	Normal(n=712)	4.774	NA	NA
GTEX-1JKYR-0826-SM-ARU8L	Normal(n=712)	4.30889	NA	NA
GTEX-1JMLX-0826-SM-CNNPP	Normal(n=712)	4.03034	NA	NA
GTEX-1JMPY-0126-SM-CJI39	Normal(n=712)	4.50906	NA	NA
GTEX-1JMPZ-0626-SM-CY8HY	Normal(n=712)	4.04701	NA	NA
GTEX-1JMQJ-2026-SM-CNPP9	Normal(n=712)	4.05485	NA	NA
GTEX-1JMQK-2126-SM-CY8I2	Normal(n=712)	4.26903	NA	NA
GTEX-1JMQL-0926-SM-CJI3F	Normal(n=712)	3.78031	NA	NA
GTEX-1JN6P-0626-SM-ARZN6	Normal(n=712)	4.50208	NA	NA
GTEX-1K2DA-1526-SM-CGQGQ	Normal(n=712)	4.30232	NA	NA
GTEX-1K2DU-0126-SM-E9TIU	Normal(n=712)	4.12019	NA	NA
GTEX-1K9T9-0826-SM-EAZ4X	Normal(n=712)	4.13011	NA	NA
GTEX-1KAFJ-0426-SM-DHXJH	Normal(n=712)	4.21878	NA	NA
GTEX-1KANC-0826-SM-D3LA8	Normal(n=712)	4.32409	NA	NA
GTEX-1KD4Q-1026-SM-CXZKJ	Normal(n=712)	4.51096	NA	NA
GTEX-1KD5A-0426-SM-D4P3X	Normal(n=712)	4.25248	NA	NA
GTEX-1KXAM-1726-SM-D3LAE	Normal(n=712)	4.49121	NA	NA
GTEX-1LB8K-0626-SM-D4P3Z	Normal(n=712)	4.09255	NA	NA
GTEX-1LBAC-0726-SM-D3L9U	Normal(n=712)	4.63227	NA	NA
GTEX-1LG7Y-0626-SM-DHXJM	Normal(n=712)	4.5435	NA	NA
GTEX-1LG7Z-0526-SM-D4P3Q	Normal(n=712)	4.02059	NA	NA
GTEX-1LGOU-0126-SM-EV79W	Normal(n=712)	4.848	NA	NA
GTEX-1LGRB-1226-SM-CNNPS	Normal(n=712)	3.94205	NA	NA
GTEX-1LH75-0626-SM-DIPG3	Normal(n=712)	3.96162	NA	NA
GTEX-1LSVX-0726-SM-E9TJG	Normal(n=712)	4.02237	NA	NA
GTEX-1LVAM-0826-SM-EV79X	Normal(n=712)	4.56377	NA	NA
GTEX-1LVAN-0726-SM-CNNPF	Normal(n=712)	4.27426	NA	NA
GTEX-1M4P7-0626-SM-EVR51	Normal(n=712)	5.0009	NA	NA
GTEX-1MA7X-0926-SM-DIPEJ	Normal(n=712)	4.0063	NA	NA
GTEX-1MCC2-0526-SM-DHXJS	Normal(n=712)	4.37643	NA	NA
GTEX-1MGNQ-0726-SM-DPRYH	Normal(n=712)	4.43296	NA	NA
GTEX-1MJK2-0826-SM-DTXE8	Normal(n=712)	4.27352	NA	NA
GTEX-1MJK3-0326-SM-DTX96	Normal(n=712)	3.81967	NA	NA
GTEX-1MUQO-0726-SM-E9TJM	Normal(n=712)	4.06867	NA	NA
GTEX-1N5O9-1026-SM-DTX8Y	Normal(n=712)	4.14893	NA	NA
GTEX-1NUQO-0926-SM-DTXEX	Normal(n=712)	4.45286	NA	NA
GTEX-1NV5F-0726-SM-DTXEH	Normal(n=712)	4.03826	NA	NA
GTEX-1O97I-1026-SM-E76PI	Normal(n=712)	4.05832	NA	NA
GTEX-1O9I2-1226-SM-E6CQC	Normal(n=712)	3.80426	NA	NA
GTEX-1OFPY-1526-SM-DTX8R	Normal(n=712)	4.06178	NA	NA
GTEX-1OJC3-0626-SM-E8VMO	Normal(n=712)	4.02945	NA	NA
GTEX-1OJC4-0526-SM-E6CQV	Normal(n=712)	4.23419	NA	NA
GTEX-1P4AB-1126-SM-DTX94	Normal(n=712)	4.73606	NA	NA
GTEX-1PBJI-0726-SM-EXUSQ	Normal(n=712)	3.62644	NA	NA
GTEX-1PBJJ-1926-SM-DTX8T	Normal(n=712)	4.39985	NA	NA
GTEX-1PDJ9-0826-SM-E76PS	Normal(n=712)	4.32265	NA	NA
GTEX-1PFEY-0226-SM-EVR3M	Normal(n=712)	4.20163	NA	NA
GTEX-1PIGE-0726-SM-DPRZD	Normal(n=712)	4.71094	NA	NA
GTEX-1PIIG-2026-SM-EVR43	Normal(n=712)	4.16672	NA	NA
GTEX-1PPGY-1426-SM-EVR3R	Normal(n=712)	4.68426	NA	NA
GTEX-1PPH8-0926-SM-DTX9U	Normal(n=712)	4.04089	NA	NA
GTEX-1PWST-0726-SM-EWRMO	Normal(n=712)	3.60999	NA	NA
GTEX-1QAET-0226-SM-EVR3T	Normal(n=712)	4.22265	NA	NA
GTEX-1QCLY-0826-SM-DTX8A	Normal(n=712)	4.28244	NA	NA
GTEX-1QCLZ-0626-SM-E6CR2	Normal(n=712)	4.57592	NA	NA
GTEX-1QEPI-0726-SM-E76QG	Normal(n=712)	4.59455	NA	NA
GTEX-1QMI2-0826-SM-EXUT4	Normal(n=712)	4.21645	NA	NA
GTEX-1QP28-0626-SM-E76P5	Normal(n=712)	4.42021	NA	NA
GTEX-1QP2A-0626-SM-DTX9C	Normal(n=712)	4.20242	NA	NA
GTEX-1QP66-0326-SM-DTX7V	Normal(n=712)	4.73769	NA	NA
GTEX-1QP67-0326-SM-EVR45	Normal(n=712)	4.41752	NA	NA
GTEX-1QP6S-2526-SM-DTX9Z	Normal(n=712)	4.44956	NA	NA
GTEX-1QP9N-0126-SM-DPRZS	Normal(n=712)	4.50462	NA	NA
GTEX-1QPFJ-0626-SM-DTX7Y	Normal(n=712)	4.63227	NA	NA
GTEX-1QW4Y-0226-SM-EAZ3U	Normal(n=712)	4.58075	NA	NA
GTEX-1R46S-0426-SM-EVR48	Normal(n=712)	3.83693	NA	NA
GTEX-1R9JW-0226-SM-EVR4K	Normal(n=712)	4.62527	NA	NA
GTEX-1R9K4-0726-SM-EWRN2	Normal(n=712)	4.03914	NA	NA
GTEX-1R9K5-0726-SM-EAZ4E	Normal(n=712)	5.19022	NA	NA
GTEX-1R9PM-0226-SM-DPRY7	Normal(n=712)	4.65707	NA	NA
GTEX-1RAZA-0826-SM-EAZ4I	Normal(n=712)	4.90929	NA	NA
GTEX-1RAZQ-0926-SM-EAZ4Q	Normal(n=712)	4.52293	NA	NA
GTEX-1RAZR-1126-SM-E6CRC	Normal(n=712)	5.12019	NA	NA
GTEX-1RAZS-1026-SM-E9TID	Normal(n=712)	3.89821	NA	NA
GTEX-1RDX4-0926-SM-E9U6D	Normal(n=712)	4.32769	NA	NA
GTEX-1RMOY-0126-SM-EWRNN	Normal(n=712)	4.22419	NA	NA
GTEX-1RNSC-1126-SM-E9TIP	Normal(n=712)	3.33842	NA	NA
GTEX-1RQEC-1026-SM-EVR5B	Normal(n=712)	4.02326	NA	NA
GTEX-1RQED-0926-SM-EWRNZ	Normal(n=712)	3.74416	NA	NA
GTEX-1S5ZU-0726-SM-EWROH	Normal(n=712)	4.72356	NA	NA
GTEX-1S83E-0726-SM-EV7B6	Normal(n=712)	4.393	NA	NA
GTEX-N7MS-2326-SM-2HMLD	Normal(n=712)	4.09592	NA	NA
GTEX-NFK9-0726-SM-2HMJW	Normal(n=712)	4.10601	NA	NA
GTEX-O5YV-1526-SM-EV799	Normal(n=712)	4.73715	NA	NA
GTEX-OHPK-2626-SM-2HMK9	Normal(n=712)	4.13175	NA	NA
GTEX-OHPL-2626-SM-2HMJA	Normal(n=712)	3.76447	NA	NA
GTEX-OHPM-2626-SM-33HC5	Normal(n=712)	4.28836	NA	NA
GTEX-OIZF-2626-SM-7P8QZ	Normal(n=712)	4.09339	NA	NA
GTEX-OIZG-0226-SM-2TC5L	Normal(n=712)	4.22033	NA	NA
GTEX-OIZI-0726-SM-2XCEI	Normal(n=712)	4.24793	NA	NA
GTEX-OOBJ-2626-SM-2I3F6	Normal(n=712)	4.46401	NA	NA
GTEX-OXRK-0626-SM-2HMJ5	Normal(n=712)	4.27575	NA	NA
GTEX-OXRL-2626-SM-2I3F1	Normal(n=712)	3.64962	NA	NA
GTEX-OXRN-1526-SM-E6CHM	Normal(n=712)	4.80116	NA	NA
GTEX-OXRO-1226-SM-48TDL	Normal(n=712)	5.15704	NA	NA
GTEX-OXRP-0326-SM-33HBJ	Normal(n=712)	4.20477	NA	NA
GTEX-P44G-0626-SM-2I5EO	Normal(n=712)	3.62644	NA	NA
GTEX-P4PQ-2626-SM-33HC9	Normal(n=712)	4.05485	NA	NA
GTEX-P4QS-2626-SM-2I3EV	Normal(n=712)	4.33557	NA	NA
GTEX-P4QT-2626-SM-2I3FM	Normal(n=712)	3.92505	NA	NA
GTEX-P78B-0526-SM-2I5F7	Normal(n=712)	4.6792	NA	NA
GTEX-PLZ4-1226-SM-2I5FE	Normal(n=712)	4.35896	NA	NA
GTEX-POYW-0826-SM-2XCEM	Normal(n=712)	4.65478	NA	NA
GTEX-PWCY-2326-SM-2I3EQ	Normal(n=712)	4.21878	NA	NA
GTEX-PWN1-2626-SM-2I3FH	Normal(n=712)	4.27724	NA	NA
GTEX-PX3G-2626-SM-2I3EG	Normal(n=712)	4.64789	NA	NA
GTEX-Q2AG-0826-SM-2HMKF	Normal(n=712)	4.74953	NA	NA
GTEX-Q2AH-0726-SM-2I3EA	Normal(n=712)	4.04876	NA	NA
GTEX-Q2AI-0326-SM-2I3EK	Normal(n=712)	4.23649	NA	NA
GTEX-Q734-0526-SM-2I3EH	Normal(n=712)	4.89821	NA	NA
GTEX-QDT8-1226-SM-EVR35	Normal(n=712)	4.3875	NA	NA
GTEX-QDVJ-0226-SM-2I5FV	Normal(n=712)	3.7939	NA	NA
GTEX-QDVN-0626-SM-2I3FP	Normal(n=712)	4.29719	NA	NA
GTEX-QEG5-0826-SM-2I5GF	Normal(n=712)	4.09677	NA	NA
GTEX-QEL4-0726-SM-3GIJ5	Normal(n=712)	4.24869	NA	NA
GTEX-QLQ7-0726-SM-2I5G2	Normal(n=712)	4.32048	NA	NA
GTEX-QV31-0726-SM-3GAEG	Normal(n=712)	4.08236	NA	NA
GTEX-QV44-0826-SM-2S1RG	Normal(n=712)	4.77768	NA	NA
GTEX-QXCU-0326-SM-2TC63	Normal(n=712)	4.38474	NA	NA
GTEX-R3RS-0726-SM-3GIJR	Normal(n=712)	4.15947	NA	NA
GTEX-R53T-0526-SM-3GADL	Normal(n=712)	5.10308	NA	NA
GTEX-R55C-0626-SM-2TF4Q	Normal(n=712)	4.16108	NA	NA
GTEX-R55E-0826-SM-2TC5M	Normal(n=712)	4.81404	NA	NA
GTEX-R55G-0726-SM-2TC6J	Normal(n=712)	4.393	NA	NA
GTEX-REY6-0526-SM-2TF5M	Normal(n=712)	3.86888	NA	NA
GTEX-RM2N-0526-SM-2TF4N	Normal(n=712)	4.46793	NA	NA
GTEX-RN5K-2826-SM-EZ6L3	Normal(n=712)	4.81044	NA	NA
GTEX-RN64-0626-SM-2TC5V	Normal(n=712)	4.49825	NA	NA
GTEX-RNOR-0926-SM-2TF56	Normal(n=712)	4.38198	NA	NA
GTEX-RTLS-0626-SM-5SI7Z	Normal(n=712)	3.84599	NA	NA
GTEX-RU1J-0226-SM-2TF5Y	Normal(n=712)	4.32625	NA	NA
GTEX-RU72-0126-SM-2TF6Z	Normal(n=712)	3.93074	NA	NA
GTEX-RUSQ-1026-SM-2TF6V	Normal(n=712)	3.9364	NA	NA
GTEX-RVPV-1226-SM-2TF73	Normal(n=712)	3.94392	NA	NA
GTEX-RWS6-0626-SM-2XCAS	Normal(n=712)	3.91073	NA	NA
GTEX-RWSA-0826-SM-2XCBF	Normal(n=712)	3.89627	NA	NA
GTEX-S32W-0726-SM-2XCBL	Normal(n=712)	3.85699	NA	NA
GTEX-S341-0226-SM-D4P1Y	Normal(n=712)	4.17951	NA	NA
GTEX-S7SE-0726-SM-2XCD7	Normal(n=712)	4.81352	NA	NA
GTEX-S7SF-0226-SM-5SI7H	Normal(n=712)	4.2555	NA	NA
GTEX-SE5C-0726-SM-4BRWY	Normal(n=712)	4.40667	NA	NA
GTEX-SIU8-0626-SM-2XCDN	Normal(n=712)	4.09255	NA	NA
GTEX-SJXC-0726-SM-2XCFJ	Normal(n=712)	4.52356	NA	NA
GTEX-SN8G-1526-SM-4DM79	Normal(n=712)	4.1102	NA	NA
GTEX-SNOS-0226-SM-32PLR	Normal(n=712)	4.34696	NA	NA
GTEX-SUCS-0226-SM-32PLQ	Normal(n=712)	4.40122	NA	NA
GTEX-T2IS-0626-SM-32QP6	Normal(n=712)	4.75596	NA	NA
GTEX-T5JW-1226-SM-3GACY	Normal(n=712)	4.51475	NA	NA
GTEX-T6MN-0626-SM-32PM9	Normal(n=712)	4.07895	NA	NA
GTEX-T6MO-0226-SM-32QOL	Normal(n=712)	4.67073	NA	NA
GTEX-T8EM-0226-SM-3DB7C	Normal(n=712)	4.08151	NA	NA
GTEX-TKQ1-0126-SM-33HB3	Normal(n=712)	4.06437	NA	NA
GTEX-TMMY-0826-SM-33HB9	Normal(n=712)	4.22188	NA	NA
GTEX-TSE9-0626-SM-3DB8B	Normal(n=712)	4.69766	NA	NA
GTEX-U3ZH-0226-SM-3DB7B	Normal(n=712)	3.89433	NA	NA
GTEX-U3ZM-0126-SM-3DB8M	Normal(n=712)	4.19298	NA	NA
GTEX-U3ZN-0326-SM-3DB86	Normal(n=712)	4.5097	NA	NA
GTEX-U412-0726-SM-EVR2Y	Normal(n=712)	4.59991	NA	NA
GTEX-U4B1-0626-SM-3DB8L	Normal(n=712)	4.3067	NA	NA
GTEX-U8T8-2326-SM-3DB96	Normal(n=712)	4.05311	NA	NA
GTEX-UJMC-0326-SM-3GAE2	Normal(n=712)	4.58256	NA	NA
GTEX-V1D1-0926-SM-4JBHQ	Normal(n=712)	4.04876	NA	NA
GTEX-V955-0426-SM-3GAEL	Normal(n=712)	4.18903	NA	NA
GTEX-VJYA-0426-SM-3GIJK	Normal(n=712)	4.75596	NA	NA
GTEX-VUSG-0426-SM-3GIKD	Normal(n=712)	4.46205	NA	NA
GTEX-W5WG-1426-SM-4KKZP	Normal(n=712)	3.78869	NA	NA
GTEX-W5X1-0426-SM-3GILB	Normal(n=712)	4.22265	NA	NA
GTEX-WEY5-0526-SM-3GIKZ	Normal(n=712)	3.85997	NA	NA
GTEX-WFG7-0326-SM-DKPO8	Normal(n=712)	4.39369	NA	NA
GTEX-WFG8-0426-SM-3GILD	Normal(n=712)	3.82883	NA	NA
GTEX-WFJO-0226-SM-3GIKW	Normal(n=712)	3.88947	NA	NA
GTEX-WH7G-0526-SM-3NMBI	Normal(n=712)	4.26903	NA	NA
GTEX-WHPG-0226-SM-3NMB9	Normal(n=712)	4.30159	NA	NA
GTEX-WHSB-1626-SM-3LK6J	Normal(n=712)	4.33271	NA	NA
GTEX-WHSE-0626-SM-4RGNF	Normal(n=712)	4.69655	NA	NA
GTEX-WK11-0926-SM-3NMAU	Normal(n=712)	4.7339	NA	NA
GTEX-WL46-0126-SM-3TW8I	Normal(n=712)	4.29572	NA	NA
GTEX-WOFL-0726-SM-3MJG4	Normal(n=712)	3.47897	NA	NA
GTEX-WRHU-0926-SM-4E3IG	Normal(n=712)	3.89045	NA	NA
GTEX-WVLH-0626-SM-3MJG7	Normal(n=712)	4.393	NA	NA
GTEX-WWYW-0826-SM-3NB2X	Normal(n=712)	4.66959	NA	NA
GTEX-WXYG-0226-SM-3NB2Y	Normal(n=712)	4.51412	NA	NA
GTEX-WY7C-0226-SM-3NB37	Normal(n=712)	4.32481	NA	NA
GTEX-WYBS-1926-SM-3NM8N	Normal(n=712)	4.42425	NA	NA
GTEX-WYJK-1626-SM-3NM9J	Normal(n=712)	4.47962	NA	NA
GTEX-WYVS-0326-SM-3NM9V	Normal(n=712)	4.59932	NA	NA
GTEX-X15G-0526-SM-3NMB7	Normal(n=712)	4.16591	NA	NA
GTEX-X261-0726-SM-EZ6MH	Normal(n=712)	4.75809	NA	NA
GTEX-X4LF-0426-SM-3NMB5	Normal(n=712)	4.62585	NA	NA
GTEX-X4XX-0926-SM-46MV7	Normal(n=712)	4.54535	NA	NA
GTEX-X4XY-0826-SM-4E3JM	Normal(n=712)	4.72574	NA	NA
GTEX-X5EB-0726-SM-46MVR	Normal(n=712)	4.47119	NA	NA
GTEX-X8HC-0726-SM-46MWG	Normal(n=712)	3.49442	NA	NA
GTEX-XBED-0126-SM-47JY7	Normal(n=712)	4.63981	NA	NA
GTEX-XBEW-0126-SM-4AT66	Normal(n=712)	4.0505	NA	NA
GTEX-XGQ4-0426-SM-4AT4I	Normal(n=712)	4.41684	NA	NA
GTEX-XLM4-0726-SM-4AT64	Normal(n=712)	4.83289	NA	NA
GTEX-XMK1-0626-SM-4B65A	Normal(n=712)	4.73552	NA	NA
GTEX-XOT4-1526-SM-EAZ2W	Normal(n=712)	4.47184	NA	NA
GTEX-XUW1-1026-SM-4BONY	Normal(n=712)	4.31325	NA	NA
GTEX-XUZC-0126-SM-4BOO6	Normal(n=712)	4.61648	NA	NA
GTEX-XV7Q-0326-SM-4BRVM	Normal(n=712)	4.55704	NA	NA
GTEX-XXEK-1326-SM-4BRV1	Normal(n=712)	4.43229	NA	NA
GTEX-XYKS-0826-SM-4BRVF	Normal(n=712)	4.28392	NA	NA
GTEX-Y111-1926-SM-4SOIS	Normal(n=712)	4.74416	NA	NA
GTEX-Y114-0626-SM-4TT98	Normal(n=712)	4.393	NA	NA
GTEX-Y3I4-0226-SM-4TT27	Normal(n=712)	3.7866	NA	NA
GTEX-Y3IK-0526-SM-4WWE3	Normal(n=712)	4.4822	NA	NA
GTEX-Y5LM-0626-SM-4V6G4	Normal(n=712)	4.17951	NA	NA
GTEX-Y5V5-0326-SM-5RQJG	Normal(n=712)	4.48929	NA	NA
GTEX-Y5V6-0526-SM-4VBRV	Normal(n=712)	4.27947	NA	NA
GTEX-Y8E4-0126-SM-4VBQ2	Normal(n=712)	4.45286	NA	NA
GTEX-Y9LG-0426-SM-4VBRT	Normal(n=712)	4.34483	NA	NA
GTEX-YB5E-0626-SM-4VDSE	Normal(n=712)	4.27575	NA	NA
GTEX-YB5K-0526-SM-5LUAS	Normal(n=712)	4.44758	NA	NA
GTEX-YEC3-0826-SM-4WWFP	Normal(n=712)	3.68482	NA	NA
GTEX-YEC4-0626-SM-5CVLU	Normal(n=712)	4.49633	NA	NA
GTEX-YF7O-0726-SM-4W213	Normal(n=712)	4.64501	NA	NA
GTEX-YFC4-2626-SM-5P9FQ	Normal(n=712)	4.91791	NA	NA
GTEX-YFCO-0326-SM-4W1ZP	Normal(n=712)	4.40939	NA	NA
GTEX-YJ89-0726-SM-5P9F7	Normal(n=712)	4.58496	NA	NA
GTEX-Z93S-0526-SM-EVYB4	Normal(n=712)	4.7137	NA	NA
GTEX-Z9EW-0226-SM-5CVM7	Normal(n=712)	3.94392	NA	NA
GTEX-ZA64-0426-SM-5HL96	Normal(n=712)	4.39917	NA	NA
GTEX-ZAB5-0726-SM-5P9JG	Normal(n=712)	4.35191	NA	NA
GTEX-ZAJG-0726-SM-5HL9A	Normal(n=712)	4.72465	NA	NA
GTEX-ZAK1-0726-SM-5HL8Q	Normal(n=712)	4.25852	NA	NA
GTEX-ZC5H-0626-SM-5LU9K	Normal(n=712)	4.10182	NA	NA
GTEX-ZDTS-0926-SM-5YY9D	Normal(n=712)	3.8953	NA	NA
GTEX-ZDXO-1726-SM-5HL6L	Normal(n=712)	4.29131	NA	NA
GTEX-ZDYS-0626-SM-5J2N5	Normal(n=712)	4.03474	NA	NA
GTEX-ZE7O-1126-SM-57WC8	Normal(n=712)	4.36527	NA	NA
GTEX-ZF28-0826-SM-4WKGJ	Normal(n=712)	4.54535	NA	NA
GTEX-ZF29-0726-SM-DO92H	Normal(n=712)	4.38405	NA	NA
GTEX-ZF3C-0826-SM-DO11E	Normal(n=712)	4.32625	NA	NA
GTEX-ZGAY-1026-SM-4WWBR	Normal(n=712)	4.56864	NA	NA
GTEX-ZLFU-0626-SM-4WWBO	Normal(n=712)	4.24793	NA	NA
GTEX-ZLV1-0126-SM-4WWBZ	Normal(n=712)	4.20398	NA	NA
GTEX-ZLWG-0526-SM-4WWFB	Normal(n=712)	4.53419	NA	NA
GTEX-ZPCL-0126-SM-4WWC8	Normal(n=712)	4.50589	NA	NA
GTEX-ZPIC-0226-SM-DO91T	Normal(n=712)	4.26153	NA	NA
GTEX-ZPU1-0426-SM-4WWCA	Normal(n=712)	4.59395	NA	NA
GTEX-ZQG8-0926-SM-57WFF	Normal(n=712)	3.90497	NA	NA
GTEX-ZQUD-0126-SM-7EPIS	Normal(n=712)	4.19219	NA	NA
GTEX-ZT9W-0226-SM-7SB6H	Normal(n=712)	3.80839	NA	NA
GTEX-ZT9X-0226-SM-51MT2	Normal(n=712)	4.1334	NA	NA
GTEX-ZTPG-0826-SM-5DUVC	Normal(n=712)	4.7148	NA	NA
GTEX-ZTSS-0226-SM-59877	Normal(n=712)	4.56986	NA	NA
GTEX-ZTX8-0626-SM-59HKC	Normal(n=712)	4.53605	NA	NA
GTEX-ZUA1-0926-SM-4YCDX	Normal(n=712)	4.82324	NA	NA
GTEX-ZV6S-0226-SM-59HJT	Normal(n=712)	4.41481	NA	NA
GTEX-ZV7C-0126-SM-57WDE	Normal(n=712)	4.3505	NA	NA
GTEX-ZVP2-0426-SM-57WC2	Normal(n=712)	4.31179	NA	NA
GTEX-ZVT3-0726-SM-5GICN	Normal(n=712)	4.50716	NA	NA
GTEX-ZVZP-1026-SM-5GICI	Normal(n=712)	4.33771	NA	NA
GTEX-ZVZQ-0626-SM-59HJU	Normal(n=712)	4.09845	NA	NA
GTEX-ZXG5-0926-SM-5NQ8H	Normal(n=712)	4.09761	NA	NA
GTEX-ZY6K-0226-SM-5SIAY	Normal(n=712)	4.10098	NA	NA
GTEX-ZYFC-0926-SM-5GZWW	Normal(n=712)	4.31832	NA	NA
GTEX-ZYFD-0826-SM-5NQ9A	Normal(n=712)	4.38474	NA	NA
GTEX-ZYFG-0626-SM-5GZYA	Normal(n=712)	4.24793	NA	NA
GTEX-ZYT6-0426-SM-5GID3	Normal(n=712)	4.72629	NA	NA
GTEX-ZYVF-1126-SM-5E458	Normal(n=712)	4.44361	NA	NA
GTEX-ZYW4-1126-SM-5SI99	Normal(n=712)	3.7666	NA	NA
GTEX-ZYY3-1926-SM-5GZXS	Normal(n=712)	4.29646	NA	NA
GTEX-ZZ64-0126-SM-5GZXA	Normal(n=712)	4.22342	NA	NA
GTEX-ZZPU-1326-SM-5GZWS	Normal(n=712)	4.01436	NA	NA

## Sheet: ZCCHC4
rownames(datas)	Type	values	times	status
TCGA-IM-A420-01	G1(n=288)	2.51324	NA	NA
TCGA-EM-A3FO-01	G1(n=288)	2.53219	NA	NA
TCGA-EL-A3H7-01	G1(n=288)	2.57364	NA	NA
TCGA-BJ-A0ZC-01	G1(n=288)	3.06164	NA	NA
TCGA-EM-A4FO-01	G1(n=288)	2.59882	NA	NA
TCGA-DJ-A2PO-01	G1(n=288)	3.39291	NA	NA
TCGA-EL-A3ZT-01	G1(n=288)	3.05292	NA	NA
TCGA-DJ-A13O-01	G1(n=288)	2.59173	NA	NA
TCGA-EM-A1CW-01	G1(n=288)	2.72185	NA	NA
TCGA-E3-A3E2-01	G1(n=288)	3.03772	NA	NA
TCGA-E8-A416-01	G1(n=288)	3.30619	NA	NA
TCGA-ET-A2N3-01	G1(n=288)	3.19376	NA	NA
TCGA-DJ-A4V0-01	G1(n=288)	3.04403	NA	NA
TCGA-EL-A3T6-01	G1(n=288)	2.60212	NA	NA
TCGA-ET-A3BO-01	G1(n=288)	3.04024	NA	NA
TCGA-CE-A481-01	G1(n=288)	3.1308	NA	NA
TCGA-E8-A419-01	G1(n=288)	2.48039	NA	NA
TCGA-E8-A438-01	G1(n=288)	2.43981	NA	NA
TCGA-E3-A3E0-01	G1(n=288)	3.49982	NA	NA
TCGA-ET-A3DS-01	G1(n=288)	3.28834	NA	NA
TCGA-DJ-A4UL-01	G1(n=288)	2.87098	NA	NA
TCGA-EM-A2CK-01	G1(n=288)	3.04324	NA	NA
TCGA-J8-A3O1-01	G1(n=288)	3.5559	NA	NA
TCGA-FE-A237-01	G1(n=288)	2.90593	NA	NA
TCGA-EM-A3O8-01	G1(n=288)	3.01885	NA	NA
TCGA-H2-A2K9-01	G1(n=288)	3.1987	NA	NA
TCGA-DJ-A1QM-01	G1(n=288)	2.82285	NA	NA
TCGA-H2-A3RH-01	G1(n=288)	3.08015	NA	NA
TCGA-IM-A41Z-01	G1(n=288)	3.04543	NA	NA
TCGA-IM-A3EB-01	G1(n=288)	2.87586	NA	NA
TCGA-EL-A3ZN-01	G1(n=288)	2.74668	NA	NA
TCGA-EL-A3ZS-01	G1(n=288)	3.17604	NA	NA
TCGA-EL-A3GR-01	G1(n=288)	3.29575	NA	NA
TCGA-ET-A39R-01	G1(n=288)	3.20013	NA	NA
TCGA-ET-A25O-01	G1(n=288)	3.28588	NA	NA
TCGA-BJ-A2N8-01	G1(n=288)	2.9264	NA	NA
TCGA-DJ-A13W-01	G1(n=288)	0.99139	NA	NA
TCGA-EL-A3N2-01	G1(n=288)	2.93904	NA	NA
TCGA-EM-A4FF-01	G1(n=288)	2.9303	NA	NA
TCGA-KS-A4I3-01	G1(n=288)	3.14626	NA	NA
TCGA-EM-A1CV-01	G1(n=288)	3.51149	NA	NA
TCGA-BJ-A3PR-01	G1(n=288)	2.50612	NA	NA
TCGA-BJ-A45J-01	G1(n=288)	2.85144	NA	NA
TCGA-EM-A3SY-01	G1(n=288)	2.30705	NA	NA
TCGA-FK-A3S3-01	G1(n=288)	3.12416	NA	NA
TCGA-FY-A3NP-01	G1(n=288)	2.96517	NA	NA
TCGA-FY-A3BL-01	G1(n=288)	2.9879	NA	NA
TCGA-MK-A4N6-01	G1(n=288)	2.36196	NA	NA
TCGA-E8-A437-01	G1(n=288)	2.45249	NA	NA
TCGA-EM-A3FL-01	G1(n=288)	2.80548	NA	NA
TCGA-J8-A3YH-01	G1(n=288)	3.25915	NA	NA
TCGA-E8-A433-01	G1(n=288)	2.48262	NA	NA
TCGA-E8-A2EA-01	G1(n=288)	2.52027	NA	NA
TCGA-ET-A3BU-01	G1(n=288)	3.07541	NA	NA
TCGA-EL-A4K0-01	G1(n=288)	3.07209	NA	NA
TCGA-DJ-A2PR-01	G1(n=288)	3.35592	NA	NA
TCGA-DJ-A3VJ-01	G1(n=288)	2.82564	NA	NA
TCGA-ET-A3DO-01	G1(n=288)	2.54117	NA	NA
TCGA-DJ-A3UV-01	G1(n=288)	3.21137	NA	NA
TCGA-J8-A3O2-06	G1(n=288)	3.25155	NA	NA
TCGA-IM-A4EB-01	G1(n=288)	2.40972	NA	NA
TCGA-FE-A234-01	G1(n=288)	2.91229	NA	NA
TCGA-EM-A2CQ-01	G1(n=288)	3.21889	NA	NA
TCGA-FY-A40K-01	G1(n=288)	3.21304	NA	NA
TCGA-ET-A40P-01	G1(n=288)	2.76352	NA	NA
TCGA-EL-A4KH-01	G1(n=288)	2.29854	NA	NA
TCGA-CE-A27D-01	G1(n=288)	3.08427	NA	NA
TCGA-KS-A4I7-01	G1(n=288)	2.94705	NA	NA
TCGA-EM-A3SZ-01	G1(n=288)	2.56988	NA	NA
TCGA-DJ-A4V4-01	G1(n=288)	2.81213	NA	NA
TCGA-EL-A4KG-01	G1(n=288)	2.70458	NA	NA
TCGA-FE-A3PD-01	G1(n=288)	3.16639	NA	NA
TCGA-ET-A40R-01	G1(n=288)	2.89927	NA	NA
TCGA-EM-A4FK-01	G1(n=288)	3.4264	NA	NA
TCGA-BJ-A2N9-01	G1(n=288)	2.5399	NA	NA
TCGA-EM-A22Q-01	G1(n=288)	1.51874	NA	NA
TCGA-FE-A23A-01	G1(n=288)	2.10615	NA	NA
TCGA-J8-A3O0-01	G1(n=288)	2.81791	NA	NA
TCGA-IM-A3ED-01	G1(n=288)	3.14604	NA	NA
TCGA-BJ-A18Y-01	G1(n=288)	3.06336	NA	NA
TCGA-EL-A3GZ-01	G1(n=288)	3.07377	NA	NA
TCGA-BJ-A0ZJ-01	G1(n=288)	3.19826	NA	NA
TCGA-FE-A232-01	G1(n=288)	2.91401	NA	NA
TCGA-DJ-A3UP-01	G1(n=288)	3.34469	NA	NA
TCGA-DJ-A1QN-01	G1(n=288)	3.27876	NA	NA
TCGA-EM-A3AJ-01	G1(n=288)	3.0391	NA	NA
TCGA-BJ-A45K-01	G1(n=288)	2.90051	NA	NA
TCGA-DJ-A3V2-01	G1(n=288)	2.95871	NA	NA
TCGA-J8-A3O2-01	G1(n=288)	3.33528	NA	NA
TCGA-ET-A3BN-01	G1(n=288)	3.16551	NA	NA
TCGA-FY-A3R9-01	G1(n=288)	2.44424	NA	NA
TCGA-KS-A41J-01	G1(n=288)	2.27116	NA	NA
TCGA-EL-A4K2-01	G1(n=288)	3.081	NA	NA
TCGA-FY-A3WA-01	G1(n=288)	3.86065	NA	NA
TCGA-DJ-A13S-01	G1(n=288)	2.48101	NA	NA
TCGA-EM-A2P1-06	G1(n=288)	2.67996	NA	NA
TCGA-DJ-A3US-01	G1(n=288)	3.18384	NA	NA
TCGA-ET-A39N-01	G1(n=288)	2.676	NA	NA
TCGA-EM-A4FV-01	G1(n=288)	3.31065	NA	NA
TCGA-ET-A40T-01	G1(n=288)	3.19391	NA	NA
TCGA-ET-A25J-01	G1(n=288)	3.05582	NA	NA
TCGA-BJ-A28R-01	G1(n=288)	3.07757	NA	NA
TCGA-BJ-A3F0-01	G1(n=288)	2.61775	NA	NA
TCGA-E3-A3E1-01	G1(n=288)	3.02742	NA	NA
TCGA-DJ-A3UM-01	G1(n=288)	3.06869	NA	NA
TCGA-BJ-A291-01	G1(n=288)	2.08226	NA	NA
TCGA-E8-A417-01	G1(n=288)	3.20256	NA	NA
TCGA-FE-A235-01	G1(n=288)	2.39561	NA	NA
TCGA-CE-A483-01	G1(n=288)	3.4041	NA	NA
TCGA-KS-A41F-01	G1(n=288)	1.56565	NA	NA
TCGA-ET-A39S-01	G1(n=288)	3.02753	NA	NA
TCGA-DJ-A3VL-01	G1(n=288)	2.56932	NA	NA
TCGA-ET-A25K-01	G1(n=288)	2.68062	NA	NA
TCGA-ET-A3BS-01	G1(n=288)	2.84453	NA	NA
TCGA-H2-A421-01	G1(n=288)	2.42401	NA	NA
TCGA-KS-A41I-01	G1(n=288)	1.42798	NA	NA
TCGA-EL-A3GO-01	G1(n=288)	3.21985	NA	NA
TCGA-EM-A2CL-01	G1(n=288)	3.31597	NA	NA
TCGA-MK-A4N7-01	G1(n=288)	2.99699	NA	NA
TCGA-CE-A13K-01	G1(n=288)	3.15025	NA	NA
TCGA-DJ-A1QQ-01	G1(n=288)	3.08524	NA	NA
TCGA-EL-A3H3-01	G1(n=288)	2.67177	NA	NA
TCGA-DJ-A4UP-01	G1(n=288)	3.08963	NA	NA
TCGA-DE-A7U5-01	G1(n=288)	2.58964	NA	NA
TCGA-DJ-A3VA-01	G1(n=288)	3.15884	NA	NA
TCGA-DJ-A4UT-01	G1(n=288)	2.77587	NA	NA
TCGA-ET-A25I-01	G1(n=288)	2.14264	NA	NA
TCGA-BJ-A45E-01	G1(n=288)	1.60639	NA	NA
TCGA-EM-A2CT-01	G1(n=288)	3.50876	NA	NA
TCGA-FY-A3ON-01	G1(n=288)	3.40912	NA	NA
TCGA-BJ-A28W-01	G1(n=288)	1.95947	NA	NA
TCGA-EL-A3CX-01	G1(n=288)	3.1317	NA	NA
TCGA-DJ-A4V2-01	G1(n=288)	2.8497	NA	NA
TCGA-ET-A39M-01	G1(n=288)	2.03446	NA	NA
TCGA-FK-A3SB-01	G1(n=288)	3.07934	NA	NA
TCGA-H2-A422-01	G1(n=288)	3.0384	NA	NA
TCGA-DJ-A3UT-01	G1(n=288)	2.48532	NA	NA
TCGA-FK-A3SD-01	G1(n=288)	2.77728	NA	NA
TCGA-FY-A4B0-01	G1(n=288)	3.25758	NA	NA
TCGA-ET-A2MZ-01	G1(n=288)	3.03691	NA	NA
TCGA-E8-A2JQ-01	G1(n=288)	2.32475	NA	NA
TCGA-ET-A39L-01	G1(n=288)	3.36813	NA	NA
TCGA-EM-A3AP-01	G1(n=288)	3.22666	NA	NA
TCGA-MK-A4N9-01	G1(n=288)	3.1583	NA	NA
TCGA-DJ-A2PN-01	G1(n=288)	3.18685	NA	NA
TCGA-E3-A3DY-01	G1(n=288)	3.12019	NA	NA
TCGA-DJ-A3VD-01	G1(n=288)	2.85461	NA	NA
TCGA-ET-A3DP-01	G1(n=288)	2.96162	NA	NA
TCGA-EL-A4JW-01	G1(n=288)	2.74934	NA	NA
TCGA-E8-A415-01	G1(n=288)	3.12823	NA	NA
TCGA-ET-A3DU-01	G1(n=288)	2.07211	NA	NA
TCGA-FK-A3SE-01	G1(n=288)	2.91883	NA	NA
TCGA-DE-A69J-01	G1(n=288)	3.29746	NA	NA
TCGA-EL-A4K4-01	G1(n=288)	2.69915	NA	NA
TCGA-ET-A39I-01	G1(n=288)	3.08809	NA	NA
TCGA-EL-A3CZ-01	G1(n=288)	3.12918	NA	NA
TCGA-DJ-A1QG-01	G1(n=288)	2.51994	NA	NA
TCGA-GE-A2C6-01	G1(n=288)	3.11105	NA	NA
TCGA-DJ-A3UN-01	G1(n=288)	3.48741	NA	NA
TCGA-EL-A3ZP-01	G1(n=288)	3.06516	NA	NA
TCGA-J8-A3YE-01	G1(n=288)	3.1292	NA	NA
TCGA-DJ-A13T-01	G1(n=288)	3.50055	NA	NA
TCGA-EM-A3FQ-01	G1(n=288)	2.95868	NA	NA
TCGA-DJ-A3UY-01	G1(n=288)	3.24419	NA	NA
TCGA-FE-A230-01	G1(n=288)	2.58503	NA	NA
TCGA-EL-A3H1-01	G1(n=288)	3.34211	NA	NA
TCGA-DJ-A2PS-01	G1(n=288)	3.4675	NA	NA
TCGA-EM-A1CU-01	G1(n=288)	3.09999	NA	NA
TCGA-ET-A40Q-01	G1(n=288)	2.44506	NA	NA
TCGA-EL-A3ZH-01	G1(n=288)	3.19324	NA	NA
TCGA-ET-A3BQ-01	G1(n=288)	2.94871	NA	NA
TCGA-ET-A3BX-01	G1(n=288)	3.13235	NA	NA
TCGA-EL-A3ZL-01	G1(n=288)	2.69095	NA	NA
TCGA-EM-A22N-01	G1(n=288)	2.53985	NA	NA
TCGA-BJ-A2N7-01	G1(n=288)	3.17607	NA	NA
TCGA-DJ-A1QD-01	G1(n=288)	2.84816	NA	NA
TCGA-BJ-A45D-01	G1(n=288)	2.14218	NA	NA
TCGA-ET-A2MX-01	G1(n=288)	2.66246	NA	NA
TCGA-EM-A3AN-01	G1(n=288)	3.27189	NA	NA
TCGA-CE-A482-01	G1(n=288)	3.21134	NA	NA
TCGA-FY-A3RA-01	G1(n=288)	3.22341	NA	NA
TCGA-DE-A0Y2-01	G1(n=288)	3.01048	NA	NA
TCGA-BJ-A0ZG-01	G1(n=288)	3.21068	NA	NA
TCGA-DJ-A2PQ-01	G1(n=288)	3.25969	NA	NA
TCGA-DJ-A3VG-01	G1(n=288)	2.79069	NA	NA
TCGA-E8-A434-01	G1(n=288)	3.47896	NA	NA
TCGA-DJ-A2Q6-01	G1(n=288)	3.34291	NA	NA
TCGA-DJ-A2Q1-01	G1(n=288)	2.19724	NA	NA
TCGA-EM-A2P3-01	G1(n=288)	3.22588	NA	NA
TCGA-BJ-A28T-01	G1(n=288)	2.93378	NA	NA
TCGA-ET-A39O-01	G1(n=288)	2.75843	NA	NA
TCGA-EL-A3T1-01	G1(n=288)	2.92031	NA	NA
TCGA-E8-A44M-01	G1(n=288)	2.8724	NA	NA
TCGA-EM-A1CS-01	G1(n=288)	3.3035	NA	NA
TCGA-CE-A485-01	G1(n=288)	3.14747	NA	NA
TCGA-BJ-A0Z3-01	G1(n=288)	3.23387	NA	NA
TCGA-EL-A3ZK-01	G1(n=288)	2.66841	NA	NA
TCGA-EM-A3FJ-01	G1(n=288)	3.09744	NA	NA
TCGA-E8-A44K-01	G1(n=288)	2.63103	NA	NA
TCGA-EL-A3H8-01	G1(n=288)	3.39583	NA	NA
TCGA-BJ-A191-01	G1(n=288)	3.36998	NA	NA
TCGA-FY-A40M-01	G1(n=288)	3.21661	NA	NA
TCGA-EM-A2OZ-01	G1(n=288)	3.17827	NA	NA
TCGA-BJ-A28X-01	G1(n=288)	2.97176	NA	NA
TCGA-EL-A3GW-01	G1(n=288)	3.13207	NA	NA
TCGA-EM-A3FQ-06	G1(n=288)	2.71354	NA	NA
TCGA-IM-A41Y-01	G1(n=288)	2.69535	NA	NA
TCGA-DJ-A13L-01	G1(n=288)	2.60985	NA	NA
TCGA-DO-A1JZ-01	G1(n=288)	3.1776	NA	NA
TCGA-ET-A2MY-01	G1(n=288)	2.90768	NA	NA
TCGA-EL-A3T8-01	G1(n=288)	3.29902	NA	NA
TCGA-ET-A25P-01	G1(n=288)	3.13906	NA	NA
TCGA-EM-A3FK-01	G1(n=288)	2.95013	NA	NA
TCGA-H2-A3RI-01	G1(n=288)	3.31361	NA	NA
TCGA-DJ-A3V8-01	G1(n=288)	3.09403	NA	NA
TCGA-EM-A3SU-06	G1(n=288)	2.63536	NA	NA
TCGA-EL-A3CV-01	G1(n=288)	2.74407	NA	NA
TCGA-BJ-A45F-01	G1(n=288)	2.22959	NA	NA
TCGA-KS-A41L-01	G1(n=288)	2.42481	NA	NA
TCGA-DO-A1K0-01	G1(n=288)	3.00761	NA	NA
TCGA-EM-A3SX-01	G1(n=288)	3.46039	NA	NA
TCGA-ET-A39J-01	G1(n=288)	3.02576	NA	NA
TCGA-L6-A4EP-01	G1(n=288)	2.54362	NA	NA
TCGA-DJ-A13V-01	G1(n=288)	3.15492	NA	NA
TCGA-DE-A2OL-01	G1(n=288)	3.53476	NA	NA
TCGA-FY-A3I4-01	G1(n=288)	2.74011	NA	NA
TCGA-EM-A4FQ-01	G1(n=288)	2.28033	NA	NA
TCGA-EM-A2P1-01	G1(n=288)	2.38245	NA	NA
TCGA-EL-A3GQ-01	G1(n=288)	3.45274	NA	NA
TCGA-EL-A4JV-01	G1(n=288)	3.18461	NA	NA
TCGA-EL-A3D1-01	G1(n=288)	2.25553	NA	NA
TCGA-KS-A4ID-01	G1(n=288)	2.26093	NA	NA
TCGA-FY-A40N-01	G1(n=288)	3.42947	NA	NA
TCGA-FE-A233-01	G1(n=288)	3.19104	NA	NA
TCGA-DJ-A4UW-01	G1(n=288)	3.03903	NA	NA
TCGA-EM-A3AL-01	G1(n=288)	3.19997	NA	NA
TCGA-J8-A3YH-06	G1(n=288)	3.10449	NA	NA
TCGA-FE-A236-01	G1(n=288)	3.00312	NA	NA
TCGA-EM-A3AK-01	G1(n=288)	3.05979	NA	NA
TCGA-KS-A4I9-01	G1(n=288)	2.61824	NA	NA
TCGA-EM-A2CJ-01	G1(n=288)	3.34209	NA	NA
TCGA-CE-A484-01	G1(n=288)	3.0714	NA	NA
TCGA-ET-A25M-01	G1(n=288)	2.9626	NA	NA
TCGA-DJ-A13M-01	G1(n=288)	2.62136	NA	NA
TCGA-ET-A3BP-01	G1(n=288)	2.94838	NA	NA
TCGA-EL-A3TA-01	G1(n=288)	2.90182	NA	NA
TCGA-IM-A3U3-01	G1(n=288)	3.03131	NA	NA
TCGA-EM-A2CP-01	G1(n=288)	2.77913	NA	NA
TCGA-EM-A22L-01	G1(n=288)	3.00324	NA	NA
TCGA-DE-A4M9-01	G1(n=288)	3.23046	NA	NA
TCGA-DJ-A3UK-01	G1(n=288)	3.59382	NA	NA
TCGA-DE-A4MC-01	G1(n=288)	2.51223	NA	NA
TCGA-ET-A3BW-01	G1(n=288)	3.39247	NA	NA
TCGA-E8-A413-01	G1(n=288)	3.27223	NA	NA
TCGA-FK-A3SG-01	G1(n=288)	2.58773	NA	NA
TCGA-EM-A22M-01	G1(n=288)	2.02485	NA	NA
TCGA-EL-A3CY-01	G1(n=288)	2.81936	NA	NA
TCGA-FE-A3PB-01	G1(n=288)	2.31811	NA	NA
TCGA-EM-A3AR-01	G1(n=288)	3.34866	NA	NA
TCGA-EM-A3OB-01	G1(n=288)	3.36945	NA	NA
TCGA-DJ-A3UX-01	G1(n=288)	3.37184	NA	NA
TCGA-KS-A4I1-01	G1(n=288)	2.90329	NA	NA
TCGA-EL-A3ZG-01	G1(n=288)	2.915	NA	NA
TCGA-ET-A3DT-01	G1(n=288)	2.75749	NA	NA
TCGA-EL-A3GX-01	G1(n=288)	2.98854	NA	NA
TCGA-EM-A2OW-01	G1(n=288)	2.6537	NA	NA
TCGA-DJ-A3VE-01	G1(n=288)	3.35572	NA	NA
TCGA-BJ-A2P4-01	G1(n=288)	2.57776	NA	NA
TCGA-EM-A4FU-01	G1(n=288)	2.46305	NA	NA
TCGA-FE-A3PC-01	G1(n=288)	2.33825	NA	NA
TCGA-EM-A3SU-01	G1(n=288)	2.21835	NA	NA
TCGA-EM-A4G1-01	G1(n=288)	3.35418	NA	NA
TCGA-KS-A4IB-01	G1(n=288)	2.96944	NA	NA
TCGA-ET-A3DR-01	G1(n=288)	3.19428	NA	NA
TCGA-ET-A25N-01	G1(n=288)	2.59019	NA	NA
TCGA-CE-A3MD-01	G1(n=288)	3.10804	NA	NA
TCGA-EM-A3FN-01	G1(n=288)	2.24662	NA	NA
TCGA-DJ-A2PX-01	G1(n=288)	2.98453	NA	NA
TCGA-EM-A2P0-01	G1(n=288)	3.11063	NA	NA
TCGA-EL-A3GS-01	G1(n=288)	3.10514	NA	NA
TCGA-EM-A4FR-01	G1(n=288)	2.38344	NA	NA
TCGA-EL-A4KD-01	G1(n=288)	2.94336	NA	NA
TCGA-FE-A238-01	G1(n=288)	3.00313	NA	NA
TCGA-DJ-A3UW-01	G1(n=288)	2.27665	NA	NA
TCGA-EM-A3AQ-01	G1(n=288)	2.80801	NA	NA
TCGA-EL-A4JX-01	G1(n=288)	1.95144	NA	NA
TCGA-EL-A3D5-01	G1(n=288)	3.1495	NA	NA
TCGA-ET-A3DQ-01	G1(n=288)	3.07456	NA	NA
TCGA-FE-A3PA-01	G2(n=52)	2.49324	NA	NA
TCGA-FY-A76V-01	G2(n=52)	3.14874	NA	NA
TCGA-EM-A2CR-01	G2(n=52)	2.37982	NA	NA
TCGA-BJ-A190-01	G2(n=52)	2.53941	NA	NA
TCGA-ET-A3DV-01	G2(n=52)	3.15674	NA	NA
TCGA-DJ-A4UR-01	G2(n=52)	2.28087	NA	NA
TCGA-EM-A3AI-01	G2(n=52)	3.09537	NA	NA
TCGA-EM-A1YD-01	G2(n=52)	3.2377	NA	NA
TCGA-DJ-A2PV-01	G2(n=52)	3.37439	NA	NA
TCGA-EM-A3O6-01	G2(n=52)	2.71875	NA	NA
TCGA-EM-A3FP-01	G2(n=52)	2.17907	NA	NA
TCGA-DJ-A13P-01	G2(n=52)	3.41307	NA	NA
TCGA-EL-A4K9-01	G2(n=52)	2.97644	NA	NA
TCGA-EL-A3CL-01	G2(n=52)	3.0156	NA	NA
TCGA-EM-A3OA-01	G2(n=52)	3.04642	NA	NA
TCGA-EL-A3MW-01	G2(n=52)	3.37216	NA	NA
TCGA-DJ-A1QF-01	G2(n=52)	3.07505	NA	NA
TCGA-DJ-A2PP-01	G2(n=52)	3.17362	NA	NA
TCGA-DJ-A2PU-01	G2(n=52)	3.28679	NA	NA
TCGA-ET-A40S-01	G2(n=52)	2.99908	NA	NA
TCGA-BJ-A0ZF-01	G2(n=52)	2.84248	NA	NA
TCGA-EM-A1YA-01	G2(n=52)	2.9544	NA	NA
TCGA-DJ-A3V3-01	G2(n=52)	2.90983	NA	NA
TCGA-BJ-A0ZA-01	G2(n=52)	3.18997	NA	NA
TCGA-BJ-A0Z0-01	G2(n=52)	3.2008	NA	NA
TCGA-EL-A3H2-01	G2(n=52)	3.36697	NA	NA
TCGA-DJ-A2QC-01	G2(n=52)	2.73587	NA	NA
TCGA-EL-A3CN-01	G2(n=52)	2.43693	NA	NA
TCGA-EL-A3GY-01	G2(n=52)	3.13903	NA	NA
TCGA-E8-A432-01	G2(n=52)	3.42661	NA	NA
TCGA-EL-A3T7-01	G2(n=52)	2.78308	NA	NA
TCGA-DJ-A3VM-01	G2(n=52)	2.79352	NA	NA
TCGA-BJ-A28S-01	G2(n=52)	3.12219	NA	NA
TCGA-BJ-A4O9-01	G2(n=52)	3.15335	NA	NA
TCGA-BJ-A0YZ-01	G2(n=52)	2.53583	NA	NA
TCGA-EL-A3ZR-01	G2(n=52)	3.04371	NA	NA
TCGA-EM-A1YB-01	G2(n=52)	2.00018	NA	NA
TCGA-FY-A3W9-01	G2(n=52)	3.27057	NA	NA
TCGA-DJ-A1QL-01	G2(n=52)	3.01723	NA	NA
TCGA-DJ-A1QI-01	G2(n=52)	3.11071	NA	NA
TCGA-EL-A3N3-01	G2(n=52)	2.49508	NA	NA
TCGA-EM-A2OV-01	G2(n=52)	2.71741	NA	NA
TCGA-EL-A3T3-01	G2(n=52)	2.59412	NA	NA
TCGA-CE-A3ME-01	G2(n=52)	3.34541	NA	NA
TCGA-E3-A3E3-01	G2(n=52)	3.03019	NA	NA
TCGA-EM-A22J-01	G2(n=52)	2.59739	NA	NA
TCGA-EL-A3ZQ-01	G2(n=52)	1.66266	NA	NA
TCGA-DJ-A2Q0-01	G2(n=52)	2.52431	NA	NA
TCGA-EM-A2CO-01	G2(n=52)	2.26595	NA	NA
TCGA-EM-A2OY-01	G2(n=52)	2.39816	NA	NA
TCGA-EM-A1YE-01	G2(n=52)	3.06605	NA	NA
TCGA-ET-A4KQ-01	G2(n=52)	3.004	NA	NA
TCGA-ET-A2N0-01	G3(n=113)	2.10256	NA	NA
TCGA-EM-A1YC-01	G3(n=113)	2.51717	NA	NA
TCGA-MK-A84Z-01	G3(n=113)	2.78676	NA	NA
TCGA-FY-A3NN-01	G3(n=113)	2.80453	NA	NA
TCGA-DJ-A1QO-01	G3(n=113)	2.65675	NA	NA
TCGA-EL-A3GV-01	G3(n=113)	3.33433	NA	NA
TCGA-BJ-A2NA-01	G3(n=113)	2.90724	NA	NA
TCGA-EL-A3CM-01	G3(n=113)	2.80841	NA	NA
TCGA-EM-A3O3-01	G3(n=113)	2.69332	NA	NA
TCGA-FY-A3TY-01	G3(n=113)	3.098	NA	NA
TCGA-EL-A3D6-01	G3(n=113)	2.23002	NA	NA
TCGA-J8-A3YF-01	G3(n=113)	2.52639	NA	NA
TCGA-ET-A25G-01	G3(n=113)	2.5369	NA	NA
TCGA-EM-A3FR-01	G3(n=113)	3.66198	NA	NA
TCGA-BJ-A3PT-01	G3(n=113)	2.42307	NA	NA
TCGA-DJ-A2Q7-01	G3(n=113)	3.28622	NA	NA
TCGA-FK-A3SH-01	G3(n=113)	2.21562	NA	NA
TCGA-DJ-A13X-01	G3(n=113)	3.46399	NA	NA
TCGA-EL-A3CU-01	G3(n=113)	3.03717	NA	NA
TCGA-J8-A3YD-01	G3(n=113)	3.0951	NA	NA
TCGA-FY-A3YR-01	G3(n=113)	2.42344	NA	NA
TCGA-BJ-A28V-01	G3(n=113)	3.47739	NA	NA
TCGA-E8-A242-01	G3(n=113)	2.34619	NA	NA
TCGA-EL-A3CR-01	G3(n=113)	2.47628	NA	NA
TCGA-FE-A239-01	G3(n=113)	3.27435	NA	NA
TCGA-DE-A69K-01	G3(n=113)	3.12244	NA	NA
TCGA-EL-A3D0-01	G3(n=113)	2.87058	NA	NA
TCGA-EM-A2CM-01	G3(n=113)	2.47763	NA	NA
TCGA-EL-A4K1-01	G3(n=113)	1.85328	NA	NA
TCGA-DJ-A2QA-01	G3(n=113)	2.06853	NA	NA
TCGA-ET-A3BV-01	G3(n=113)	2.73686	NA	NA
TCGA-EL-A4KI-01	G3(n=113)	2.32593	NA	NA
TCGA-DJ-A3VB-01	G3(n=113)	2.57587	NA	NA
TCGA-J8-A3YG-01	G3(n=113)	2.81328	NA	NA
TCGA-EL-A3T2-01	G3(n=113)	3.71208	NA	NA
TCGA-ET-A39K-01	G3(n=113)	2.44119	NA	NA
TCGA-H2-A26U-01	G3(n=113)	2.5019	NA	NA
TCGA-BJ-A45H-01	G3(n=113)	3.17359	NA	NA
TCGA-EM-A2P2-01	G3(n=113)	3.03873	NA	NA
TCGA-EL-A4K7-01	G3(n=113)	2.42081	NA	NA
TCGA-DJ-A3V4-01	G3(n=113)	3.10244	NA	NA
TCGA-FY-A3R8-01	G3(n=113)	3.05165	NA	NA
TCGA-DJ-A3UU-01	G3(n=113)	3.39296	NA	NA
TCGA-DJ-A3UQ-01	G3(n=113)	3.03682	NA	NA
TCGA-ET-A2N4-01	G3(n=113)	3.00788	NA	NA
TCGA-J8-A42S-01	G3(n=113)	2.91747	NA	NA
TCGA-J8-A4HW-01	G3(n=113)	3.01596	NA	NA
TCGA-FK-A4UB-01	G3(n=113)	2.56893	NA	NA
TCGA-DJ-A2PW-01	G3(n=113)	2.79751	NA	NA
TCGA-EL-A3MZ-01	G3(n=113)	2.58602	NA	NA
TCGA-BJ-A45C-01	G3(n=113)	3.45568	NA	NA
TCGA-EL-A3TB-01	G3(n=113)	3.1113	NA	NA
TCGA-BJ-A45G-01	G3(n=113)	3.0645	NA	NA
TCGA-DE-A0XZ-01	G3(n=113)	3.16858	NA	NA
TCGA-BJ-A45I-01	G3(n=113)	2.6537	NA	NA
TCGA-DJ-A2PZ-01	G3(n=113)	2.84838	NA	NA
TCGA-DJ-A3V7-01	G3(n=113)	3.05182	NA	NA
TCGA-DJ-A2Q4-01	G3(n=113)	2.94017	NA	NA
TCGA-DJ-A3UR-01	G3(n=113)	3.2494	NA	NA
TCGA-DJ-A3V5-01	G3(n=113)	3.17706	NA	NA
TCGA-DJ-A1QH-01	G3(n=113)	3.2314	NA	NA
TCGA-BJ-A3PU-01	G3(n=113)	2.18593	NA	NA
TCGA-BJ-A192-01	G3(n=113)	2.63882	NA	NA
TCGA-E8-A414-01	G3(n=113)	3.43423	NA	NA
TCGA-BJ-A0Z5-01	G3(n=113)	2.77779	NA	NA
TCGA-ET-A3DW-01	G3(n=113)	2.89892	NA	NA
TCGA-EM-A22I-01	G3(n=113)	2.487	NA	NA
TCGA-DJ-A2Q3-01	G3(n=113)	2.98444	NA	NA
TCGA-L6-A4EU-01	G3(n=113)	2.27101	NA	NA
TCGA-DJ-A3UZ-01	G3(n=113)	3.50752	NA	NA
TCGA-DJ-A2PY-01	G3(n=113)	3.15473	NA	NA
TCGA-EL-A3GP-01	G3(n=113)	2.80727	NA	NA
TCGA-EM-A3O7-01	G3(n=113)	2.6717	NA	NA
TCGA-EM-A2CU-01	G3(n=113)	2.82196	NA	NA
TCGA-ET-A4KN-01	G3(n=113)	0.237931	NA	NA
TCGA-FY-A3R7-01	G3(n=113)	3.19889	NA	NA
TCGA-DJ-A2Q2-01	G3(n=113)	3.40962	NA	NA
TCGA-DJ-A1QE-01	G3(n=113)	2.95062	NA	NA
TCGA-DJ-A13U-01	G3(n=113)	3.11063	NA	NA
TCGA-EL-A4JZ-01	G3(n=113)	2.88518	NA	NA
TCGA-J8-A4HW-06	G3(n=113)	2.93911	NA	NA
TCGA-BJ-A0ZE-01	G3(n=113)	2.19484	NA	NA
TCGA-EM-A4FH-01	G3(n=113)	3.20586	NA	NA
TCGA-EL-A3CW-01	G3(n=113)	3.07846	NA	NA
TCGA-EM-A3ST-01	G3(n=113)	2.92678	NA	NA
TCGA-BJ-A290-01	G3(n=113)	3.22846	NA	NA
TCGA-FY-A3I5-01	G3(n=113)	2.95054	NA	NA
TCGA-FY-A4B4-01	G3(n=113)	2.8019	NA	NA
TCGA-FY-A4B3-01	G3(n=113)	2.75352	NA	NA
TCGA-ET-A39P-01	G3(n=113)	2.98145	NA	NA
TCGA-DJ-A13R-01	G3(n=113)	1.49656	NA	NA
TCGA-EL-A3CO-01	G3(n=113)	2.63089	NA	NA
TCGA-KS-A4IC-01	G3(n=113)	2.98331	NA	NA
TCGA-DJ-A2PT-01	G3(n=113)	2.5538	NA	NA
TCGA-ET-A25R-01	G3(n=113)	2.91479	NA	NA
TCGA-EL-A3GU-01	G3(n=113)	2.63376	NA	NA
TCGA-DJ-A2Q9-01	G3(n=113)	2.99509	NA	NA
TCGA-J8-A3NZ-01	G3(n=113)	3.00908	NA	NA
TCGA-E3-A3DZ-01	G3(n=113)	3.37983	NA	NA
TCGA-DJ-A3VI-01	G3(n=113)	2.97317	NA	NA
TCGA-DJ-A3VK-01	G3(n=113)	3.18317	NA	NA
TCGA-BJ-A0Z9-01	G3(n=113)	2.96986	NA	NA
TCGA-EL-A3ZO-01	G3(n=113)	2.57597	NA	NA
TCGA-DE-A4M8-01	G3(n=113)	2.50828	NA	NA
TCGA-BJ-A28Z-01	G3(n=113)	2.24053	NA	NA
TCGA-EL-A3T0-01	G3(n=113)	2.8607	NA	NA
TCGA-DJ-A3V6-01	G3(n=113)	3.07118	NA	NA
TCGA-BJ-A4O8-01	G3(n=113)	2.94909	NA	NA
TCGA-DE-A4MA-01	G3(n=113)	1.82277	NA	NA
TCGA-ET-A2N5-01	G3(n=113)	2.93862	NA	NA
TCGA-ET-A39T-01	G3(n=113)	3.29734	NA	NA
TCGA-L6-A4EQ-01	G3(n=113)	2.83788	NA	NA
TCGA-FY-A3NM-01	G3(n=113)	3.58201	NA	NA
TCGA-KS-A4I5-01	G4(n=57)	2.63828	NA	NA
TCGA-EM-A4FM-01	G4(n=57)	2.45875	NA	NA
TCGA-DJ-A3V9-01	G4(n=57)	3.00355	NA	NA
TCGA-E8-A436-01	G4(n=57)	2.8478	NA	NA
TCGA-EM-A2OX-01	G4(n=57)	3.15743	NA	NA
TCGA-DE-A0Y3-01	G4(n=57)	3.13296	NA	NA
TCGA-EL-A3CT-01	G4(n=57)	2.7793	NA	NA
TCGA-EM-A22O-01	G4(n=57)	3.07584	NA	NA
TCGA-DE-A3KN-01	G4(n=57)	3.13942	NA	NA
TCGA-FE-A22Z-01	G4(n=57)	2.52517	NA	NA
TCGA-E8-A418-01	G4(n=57)	2.97953	NA	NA
TCGA-EL-A3D4-01	G4(n=57)	2.71657	NA	NA
TCGA-EM-A2CN-01	G4(n=57)	3.01125	NA	NA
TCGA-EM-A3AO-01	G4(n=57)	2.96036	NA	NA
TCGA-DJ-A4V5-01	G4(n=57)	3.11142	NA	NA
TCGA-EL-A3H5-01	G4(n=57)	1.88198	NA	NA
TCGA-EL-A3T9-01	G4(n=57)	3.03854	NA	NA
TCGA-EM-A3FM-01	G4(n=57)	1.96529	NA	NA
TCGA-QD-A8IV-01	G4(n=57)	3.18228	NA	NA
TCGA-EM-A2CS-01	G4(n=57)	3.09366	NA	NA
TCGA-EL-A3ZM-01	G4(n=57)	2.02375	NA	NA
TCGA-DJ-A3V0-01	G4(n=57)	2.48047	NA	NA
TCGA-ET-A3BT-01	G4(n=57)	2.9194	NA	NA
TCGA-J8-A4HY-01	G4(n=57)	2.71925	NA	NA
TCGA-EL-A4K6-01	G4(n=57)	2.92985	NA	NA
TCGA-EL-A3MY-01	G4(n=57)	2.85663	NA	NA
TCGA-E8-A3X7-01	G4(n=57)	2.28907	NA	NA
TCGA-BJ-A0ZB-01	G4(n=57)	2.86803	NA	NA
TCGA-EM-A4FN-01	G4(n=57)	2.10067	NA	NA
TCGA-FY-A40L-01	G4(n=57)	2.7881	NA	NA
TCGA-DJ-A3VF-01	G4(n=57)	2.62992	NA	NA
TCGA-BJ-A3EZ-01	G4(n=57)	2.89097	NA	NA
TCGA-DJ-A3UO-01	G4(n=57)	2.78821	NA	NA
TCGA-DE-A4MB-01	G4(n=57)	2.75756	NA	NA
TCGA-DE-A4MD-06	G4(n=57)	2.46537	NA	NA
TCGA-IM-A3U2-01	G4(n=57)	2.56913	NA	NA
TCGA-EM-A2CS-06	G4(n=57)	2.67645	NA	NA
TCGA-DJ-A2Q5-01	G4(n=57)	2.93663	NA	NA
TCGA-BJ-A0ZH-01	G4(n=57)	2.71359	NA	NA
TCGA-DJ-A2QB-01	G4(n=57)	2.05714	NA	NA
TCGA-DJ-A4UQ-01	G4(n=57)	3.24109	NA	NA
TCGA-BJ-A0Z2-01	G4(n=57)	3.21297	NA	NA
TCGA-ET-A25L-01	G4(n=57)	2.76371	NA	NA
TCGA-EL-A3MX-01	G4(n=57)	2.34562	NA	NA
TCGA-L6-A4ET-01	G4(n=57)	3.1119	NA	NA
TCGA-E3-A3E5-01	G4(n=57)	3.28933	NA	NA
TCGA-BJ-A18Z-01	G4(n=57)	2.75773	NA	NA
TCGA-4C-A93U-01	G4(n=57)	3.13407	NA	NA
TCGA-EL-A3CS-01	G4(n=57)	3.28775	NA	NA
TCGA-FY-A3R6-01	G4(n=57)	2.8017	NA	NA
TCGA-DO-A2HM-01	G4(n=57)	3.16765	NA	NA
TCGA-EM-A22P-01	G4(n=57)	3.25051	NA	NA
TCGA-DE-A4MD-01	G4(n=57)	3.34605	NA	NA
TCGA-EM-A22K-01	G4(n=57)	3.14978	NA	NA
TCGA-EM-A1CT-01	G4(n=57)	2.52695	NA	NA
TCGA-FE-A231-01	G4(n=57)	2.96042	NA	NA
TCGA-EL-A3H4-01	G4(n=57)	2.86358	NA	NA
TCGA-ET-A3DW-11	Normal(n=712)	2.94161	NA	NA
TCGA-EL-A3TA-11	Normal(n=712)	3.57768	NA	NA
TCGA-EL-A3T7-11	Normal(n=712)	3.3444	NA	NA
TCGA-BJ-A3PR-11	Normal(n=712)	2.24303	NA	NA
TCGA-DO-A1JZ-11	Normal(n=712)	3.12994	NA	NA
TCGA-BJ-A28W-11	Normal(n=712)	1.66371	NA	NA
TCGA-BJ-A28R-11	Normal(n=712)	3.15577	NA	NA
TCGA-KS-A41I-11	Normal(n=712)	2.92503	NA	NA
TCGA-EL-A3ZG-11	Normal(n=712)	2.90128	NA	NA
TCGA-BJ-A2N7-11	Normal(n=712)	3.38833	NA	NA
TCGA-EL-A3ZQ-11	Normal(n=712)	3.34135	NA	NA
TCGA-EM-A1CV-11	Normal(n=712)	3.4808	NA	NA
TCGA-BJ-A290-11	Normal(n=712)	3.18968	NA	NA
TCGA-EL-A3ZO-11	Normal(n=712)	2.86847	NA	NA
TCGA-EL-A3T8-11	Normal(n=712)	3.24219	NA	NA
TCGA-H2-A3RI-11	Normal(n=712)	3.32347	NA	NA
TCGA-EL-A3N2-11	Normal(n=712)	3.42248	NA	NA
TCGA-BJ-A28X-11	Normal(n=712)	3.1397	NA	NA
TCGA-EM-A1YC-11	Normal(n=712)	2.594	NA	NA
TCGA-EL-A3MX-11	Normal(n=712)	3.17183	NA	NA
TCGA-ET-A2N5-11	Normal(n=712)	3.23347	NA	NA
TCGA-EL-A3T2-11	Normal(n=712)	3.53001	NA	NA
TCGA-GE-A2C6-11	Normal(n=712)	3.09501	NA	NA
TCGA-ET-A3DP-11	Normal(n=712)	3.10516	NA	NA
TCGA-BJ-A3PU-11	Normal(n=712)	3.4689	NA	NA
TCGA-EL-A3ZH-11	Normal(n=712)	3.39512	NA	NA
TCGA-EL-A3ZP-11	Normal(n=712)	3.27974	NA	NA
TCGA-EL-A3H2-11	Normal(n=712)	3.24022	NA	NA
TCGA-EM-A1CU-11	Normal(n=712)	3.47695	NA	NA
TCGA-EL-A3T3-11	Normal(n=712)	3.24149	NA	NA
TCGA-H2-A2K9-11	Normal(n=712)	3.19223	NA	NA
TCGA-EM-A3ST-11	Normal(n=712)	2.86011	NA	NA
TCGA-EL-A3H7-11	Normal(n=712)	2.66173	NA	NA
TCGA-EL-A3T6-11	Normal(n=712)	2.76263	NA	NA
TCGA-EL-A3MY-11	Normal(n=712)	3.18576	NA	NA
TCGA-EL-A3TB-11	Normal(n=712)	3.37787	NA	NA
TCGA-FY-A3TY-11	Normal(n=712)	3.57486	NA	NA
TCGA-EL-A3T0-11	Normal(n=712)	3.10811	NA	NA
TCGA-BJ-A2N8-11	Normal(n=712)	3.29191	NA	NA
TCGA-BJ-A2NA-11	Normal(n=712)	2.82026	NA	NA
TCGA-EM-A1CS-11	Normal(n=712)	3.22464	NA	NA
TCGA-EL-A3ZR-11	Normal(n=712)	3.33758	NA	NA
TCGA-EL-A3ZS-11	Normal(n=712)	1.92018	NA	NA
TCGA-EM-A1CW-11	Normal(n=712)	3.8759	NA	NA
TCGA-ET-A2MX-11	Normal(n=712)	3.261	NA	NA
TCGA-EL-A3ZT-11	Normal(n=712)	3.24502	NA	NA
TCGA-KS-A41L-11	Normal(n=712)	3.45353	NA	NA
TCGA-KS-A41J-11	Normal(n=712)	3.18658	NA	NA
TCGA-EM-A1CT-11	Normal(n=712)	2.74041	NA	NA
TCGA-E8-A2JQ-11	Normal(n=712)	3.02485	NA	NA
TCGA-EL-A3N3-11	Normal(n=712)	3.18756	NA	NA
TCGA-EL-A3H1-11	Normal(n=712)	3.1334	NA	NA
TCGA-EL-A3T1-11	Normal(n=712)	2.82348	NA	NA
TCGA-EL-A3MW-11	Normal(n=712)	3.50755	NA	NA
TCGA-EL-A3ZM-11	Normal(n=712)	2.99284	NA	NA
TCGA-BJ-A2N9-11	Normal(n=712)	3.09542	NA	NA
TCGA-EL-A3ZL-11	Normal(n=712)	3.53452	NA	NA
TCGA-EL-A3GZ-11	Normal(n=712)	3.44006	NA	NA
TCGA-EL-A3ZK-11	Normal(n=712)	3.17742	NA	NA
GTEX-111CU-0226-SM-5GZXC	Normal(n=712)	2.54176	NA	NA
GTEX-111FC-1026-SM-5GZX1	Normal(n=712)	2.39259	NA	NA
GTEX-111VG-0526-SM-5N9BW	Normal(n=712)	2.45891	NA	NA
GTEX-111YS-0726-SM-5GZY8	Normal(n=712)	2.51248	NA	NA
GTEX-1122O-0226-SM-5N9DA	Normal(n=712)	2.30422	NA	NA
GTEX-1128S-0126-SM-5H12S	Normal(n=712)	2.80983	NA	NA
GTEX-113JC-0126-SM-5EGJW	Normal(n=712)	2.10467	NA	NA
GTEX-117XS-0526-SM-5987Q	Normal(n=712)	2.64062	NA	NA
GTEX-117YW-0126-SM-5EGGN	Normal(n=712)	2.9501	NA	NA
GTEX-117YX-1226-SM-5H11S	Normal(n=712)	2.8679	NA	NA
GTEX-1192W-0126-SM-5EGGS	Normal(n=712)	2.5612	NA	NA
GTEX-1192X-1126-SM-5EGGU	Normal(n=712)	2.6427	NA	NA
GTEX-11DXX-0226-SM-5P9HL	Normal(n=712)	2.37128	NA	NA
GTEX-11DXY-0426-SM-5H12R	Normal(n=712)	2.71677	NA	NA
GTEX-11DXZ-0926-SM-5N9CG	Normal(n=712)	2.98386	NA	NA
GTEX-11DYG-0826-SM-5N9GH	Normal(n=712)	2.63157	NA	NA
GTEX-11DZ1-2726-SM-5A5KH	Normal(n=712)	2.57725	NA	NA
GTEX-11EI6-0726-SM-59866	Normal(n=712)	2.31179	NA	NA
GTEX-11EM3-0126-SM-5985K	Normal(n=712)	2.53032	NA	NA
GTEX-11EMC-0226-SM-5EGLP	Normal(n=712)	2.57337	NA	NA
GTEX-11EQ8-0826-SM-5N9FG	Normal(n=712)	2.84539	NA	NA
GTEX-11EQ9-0626-SM-5A5K1	Normal(n=712)	2.58135	NA	NA
GTEX-11GS4-0826-SM-5986J	Normal(n=712)	2.124	NA	NA
GTEX-11GSO-0626-SM-5A5LW	Normal(n=712)	2.7031	NA	NA
GTEX-11GSP-0126-SM-5A5KU	Normal(n=712)	2.43429	NA	NA
GTEX-11I78-0526-SM-5986A	Normal(n=712)	2.49697	NA	NA
GTEX-11LCK-0526-SM-5A5M9	Normal(n=712)	2.67061	NA	NA
GTEX-11NSD-0126-SM-5987F	Normal(n=712)	2.92029	NA	NA
GTEX-11NUK-1026-SM-5HL5J	Normal(n=712)	2.67582	NA	NA
GTEX-11NV4-0626-SM-5N9BR	Normal(n=712)	2.71831	NA	NA
GTEX-11O72-2326-SM-5BC7H	Normal(n=712)	2.25248	NA	NA
GTEX-11OF3-0626-SM-5BC4Y	Normal(n=712)	3.05398	NA	NA
GTEX-11P7K-0226-SM-5986Z	Normal(n=712)	2.8512	NA	NA
GTEX-11P81-0126-SM-5HL5Y	Normal(n=712)	2.97361	NA	NA
GTEX-11P82-0226-SM-5HL4O	Normal(n=712)	2.68392	NA	NA
GTEX-11TT1-1126-SM-5P9GV	Normal(n=712)	2.49953	NA	NA
GTEX-11TTK-0826-SM-5N9EG	Normal(n=712)	2.07211	NA	NA
GTEX-11TUW-0226-SM-5LU8X	Normal(n=712)	2.8538	NA	NA
GTEX-11UD2-0626-SM-5GU6L	Normal(n=712)	2.48723	NA	NA
GTEX-11VI4-0226-SM-5GU6C	Normal(n=712)	2.85699	NA	NA
GTEX-11XUK-0226-SM-5EQLW	Normal(n=712)	2.6227	NA	NA
GTEX-11ZTS-1126-SM-5LU9X	Normal(n=712)	2.63436	NA	NA
GTEX-11ZTT-1026-SM-5EQKF	Normal(n=712)	2.35163	NA	NA
GTEX-11ZVC-0126-SM-5986G	Normal(n=712)	2.91667	NA	NA
GTEX-1211K-0726-SM-5FQUW	Normal(n=712)	2.66061	NA	NA
GTEX-1212Z-0426-SM-5FQT6	Normal(n=712)	2.65466	NA	NA
GTEX-12584-0826-SM-5FQSK	Normal(n=712)	3.22404	NA	NA
GTEX-12696-0326-SM-5EGL4	Normal(n=712)	2.69777	NA	NA
GTEX-1269C-0226-SM-5EGKS	Normal(n=712)	2.34653	NA	NA
GTEX-12BJ1-0426-SM-5FQSO	Normal(n=712)	2.63483	NA	NA
GTEX-12WSC-0826-SM-5EQ5Q	Normal(n=712)	2.61565	NA	NA
GTEX-12WSD-0926-SM-5GCNL	Normal(n=712)	3.08219	NA	NA
GTEX-12WSE-1226-SM-73KUF	Normal(n=712)	2.52832	NA	NA
GTEX-12WSG-0226-SM-5EGIF	Normal(n=712)	3.11153	NA	NA
GTEX-12WSH-0226-SM-5GCOG	Normal(n=712)	2.51122	NA	NA
GTEX-12WSJ-0326-SM-5GCMT	Normal(n=712)	2.61777	NA	NA
GTEX-12WSK-0926-SM-5CVNQ	Normal(n=712)	2.8883	NA	NA
GTEX-12WSL-0626-SM-5GCOY	Normal(n=712)	3.08372	NA	NA
GTEX-12WSN-0726-SM-5GCMS	Normal(n=712)	2.64916	NA	NA
GTEX-12ZZX-1226-SM-5EGHS	Normal(n=712)	2.46806	NA	NA
GTEX-12ZZY-0826-SM-5EQMT	Normal(n=712)	3.05745	NA	NA
GTEX-12ZZZ-1226-SM-59HK1	Normal(n=712)	2.681	NA	NA
GTEX-13111-0226-SM-5EQ55	Normal(n=712)	2.91953	NA	NA
GTEX-13112-0326-SM-5P9IW	Normal(n=712)	2.93414	NA	NA
GTEX-13113-0126-SM-5LZVX	Normal(n=712)	2.72094	NA	NA
GTEX-1313W-0726-SM-5EGK1	Normal(n=712)	2.55016	NA	NA
GTEX-131XE-0126-SM-5LZVC	Normal(n=712)	2.81435	NA	NA
GTEX-131XF-1826-SM-5EGKG	Normal(n=712)	2.91437	NA	NA
GTEX-131XG-0226-SM-5IFG1	Normal(n=712)	2.84217	NA	NA
GTEX-131XH-0526-SM-5DUX7	Normal(n=712)	2.43909	NA	NA
GTEX-131YS-0726-SM-5P9G9	Normal(n=712)	2.68616	NA	NA
GTEX-132AR-1126-SM-5P9GA	Normal(n=712)	3.05832	NA	NA
GTEX-132NY-1026-SM-5P9IY	Normal(n=712)	2.77674	NA	NA
GTEX-132QS-0326-SM-5IJFN	Normal(n=712)	2.59765	NA	NA
GTEX-133LE-0326-SM-5P9G4	Normal(n=712)	2.56267	NA	NA
GTEX-1399R-0126-SM-5IFEV	Normal(n=712)	2.97984	NA	NA
GTEX-1399T-0126-SM-5KM15	Normal(n=712)	2.98987	NA	NA
GTEX-1399U-0326-SM-5P9G5	Normal(n=712)	2.91265	NA	NA
GTEX-139T6-0326-SM-5J2LY	Normal(n=712)	2.58207	NA	NA
GTEX-139TS-0126-SM-5K7XJ	Normal(n=712)	2.49748	NA	NA
GTEX-139UW-0126-SM-5KM1B	Normal(n=712)	2.2549	NA	NA
GTEX-139YR-1226-SM-5IFEU	Normal(n=712)	2.96901	NA	NA
GTEX-13CF3-0926-SM-5LZZC	Normal(n=712)	2.69889	NA	NA
GTEX-13D11-0226-SM-5LZXL	Normal(n=712)	2.31904	NA	NA
GTEX-13FH7-0126-SM-5KLZ1	Normal(n=712)	2.76956	NA	NA
GTEX-13FHO-0926-SM-5N9EW	Normal(n=712)	2.73401	NA	NA
GTEX-13FHP-0926-SM-5L3EC	Normal(n=712)	2.98605	NA	NA
GTEX-13FLV-0226-SM-5J2OF	Normal(n=712)	2.9201	NA	NA
GTEX-13FLW-0326-SM-5J2M4	Normal(n=712)	2.70863	NA	NA
GTEX-13FTW-0626-SM-5IFEX	Normal(n=712)	2.60715	NA	NA
GTEX-13FTY-0726-SM-5J2OH	Normal(n=712)	2.68145	NA	NA
GTEX-13FXS-0726-SM-5LZXJ	Normal(n=712)	2.14926	NA	NA
GTEX-13G51-1226-SM-5K7Z3	Normal(n=712)	2.89297	NA	NA
GTEX-13IVO-0926-SM-5KLZP	Normal(n=712)	2.976	NA	NA
GTEX-13JVG-0926-SM-5IJE1	Normal(n=712)	2.38128	NA	NA
GTEX-13N11-1026-SM-5K7XQ	Normal(n=712)	2.97636	NA	NA
GTEX-13N1W-0826-SM-5MR5J	Normal(n=712)	2.39451	NA	NA
GTEX-13N2G-0726-SM-5MR38	Normal(n=712)	2.35586	NA	NA
GTEX-13NYB-0726-SM-5MR4J	Normal(n=712)	2.54003	NA	NA
GTEX-13NYC-2426-SM-5MR3K	Normal(n=712)	2.18998	NA	NA
GTEX-13NZ8-0226-SM-5J2OK	Normal(n=712)	2.89336	NA	NA
GTEX-13NZ9-1126-SM-5MR37	Normal(n=712)	2.65489	NA	NA
GTEX-13NZA-1026-SM-5MR48	Normal(n=712)	2.014	NA	NA
GTEX-13O1R-0826-SM-5J2MB	Normal(n=712)	3.01275	NA	NA
GTEX-13O21-2226-SM-5MR3L	Normal(n=712)	2.5828	NA	NA
GTEX-13O3O-0926-SM-5KM1F	Normal(n=712)	2.85519	NA	NA
GTEX-13O3P-0726-SM-5J2OM	Normal(n=712)	2.76893	NA	NA
GTEX-13O3Q-0626-SM-5IJG1	Normal(n=712)	2.6931	NA	NA
GTEX-13O61-0226-SM-5KM52	Normal(n=712)	2.54052	NA	NA
GTEX-13OVG-0226-SM-5LU93	Normal(n=712)	2.8532	NA	NA
GTEX-13OVI-0826-SM-5KLZ8	Normal(n=712)	2.81476	NA	NA
GTEX-13OVJ-0626-SM-5J2O2	Normal(n=712)	2.18142	NA	NA
GTEX-13OVK-0226-SM-6M472	Normal(n=712)	3.34454	NA	NA
GTEX-13OW5-0626-SM-5J2N2	Normal(n=712)	2.22712	NA	NA
GTEX-13OW6-0726-SM-5L3FX	Normal(n=712)	2.95159	NA	NA
GTEX-13OW7-0826-SM-5L3EL	Normal(n=712)	2.36149	NA	NA
GTEX-13OW8-0126-SM-5IJE5	Normal(n=712)	2.63575	NA	NA
GTEX-13PDP-1026-SM-5L3FA	Normal(n=712)	2.74244	NA	NA
GTEX-13PL6-1026-SM-5L3E5	Normal(n=712)	2.64616	NA	NA
GTEX-13PVQ-0726-SM-5L3GI	Normal(n=712)	2.98404	NA	NA
GTEX-13PVR-0626-SM-5S2RC	Normal(n=712)	2.44546	NA	NA
GTEX-13QBU-0626-SM-5J2OG	Normal(n=712)	2.43856	NA	NA
GTEX-13QJ3-0926-SM-73KX5	Normal(n=712)	2.76998	NA	NA
GTEX-13QJC-0826-SM-5RQKC	Normal(n=712)	2.91896	NA	NA
GTEX-13RTJ-0326-SM-5YYAE	Normal(n=712)	2.60834	NA	NA
GTEX-13RTK-0326-SM-5RQHS	Normal(n=712)	2.91227	NA	NA
GTEX-13S86-1126-SM-5RQJX	Normal(n=712)	2.39424	NA	NA
GTEX-13U4I-0526-SM-5LU59	Normal(n=712)	3.08763	NA	NA
GTEX-13VXT-0626-SM-5SIA1	Normal(n=712)	2.92467	NA	NA
GTEX-13VXU-0826-SM-5KLZ2	Normal(n=712)	2.39149	NA	NA
GTEX-13W46-0926-SM-5LU3T	Normal(n=712)	2.91915	NA	NA
GTEX-13X6H-0526-SM-5LU4Q	Normal(n=712)	2.73552	NA	NA
GTEX-13X6J-0826-SM-5LU32	Normal(n=712)	2.8748	NA	NA
GTEX-13YAN-0926-SM-5O9C3	Normal(n=712)	3.04597	NA	NA
GTEX-144GL-1226-SM-5O9A4	Normal(n=712)	2.65008	NA	NA
GTEX-144GM-0226-SM-5Q5CB	Normal(n=712)	2.2555	NA	NA
GTEX-144GO-0126-SM-5LUAO	Normal(n=712)	2.61306	NA	NA
GTEX-145LT-0226-SM-5S2QK	Normal(n=712)	2.40081	NA	NA
GTEX-145LU-0426-SM-5O9AH	Normal(n=712)	2.98368	NA	NA
GTEX-145ME-0126-SM-5S2QM	Normal(n=712)	2.65466	NA	NA
GTEX-145MG-0826-SM-5Q5C2	Normal(n=712)	2.93301	NA	NA
GTEX-145MH-0426-SM-5LU8T	Normal(n=712)	2.80488	NA	NA
GTEX-145MI-1126-SM-5O9AK	Normal(n=712)	3.16832	NA	NA
GTEX-146FQ-0726-SM-5LUA7	Normal(n=712)	2.99621	NA	NA
GTEX-146FR-0326-SM-5SI8U	Normal(n=712)	2.84056	NA	NA
GTEX-14753-0926-SM-5Q5BI	Normal(n=712)	2.55851	NA	NA
GTEX-1477Z-0226-SM-5TDCI	Normal(n=712)	3.21878	NA	NA
GTEX-147F4-0826-SM-5QGRB	Normal(n=712)	2.38902	NA	NA
GTEX-147GR-0726-SM-5S2PL	Normal(n=712)	2.47197	NA	NA
GTEX-148VI-0526-SM-5TDDG	Normal(n=712)	3.27262	NA	NA
GTEX-148VJ-0726-SM-5LU8J	Normal(n=712)	2.81824	NA	NA
GTEX-1497J-0126-SM-5Q5BK	Normal(n=712)	2.79867	NA	NA
GTEX-14A5H-0726-SM-5Q5DW	Normal(n=712)	3.02077	NA	NA
GTEX-14A6H-2426-SM-5Q5BO	Normal(n=712)	2.81311	NA	NA
GTEX-14ABY-0926-SM-5Q5DY	Normal(n=712)	2.74846	NA	NA
GTEX-14AS3-0226-SM-5Q5B6	Normal(n=712)	3.06609	NA	NA
GTEX-14ASI-0726-SM-5Q5DC	Normal(n=712)	2.65466	NA	NA
GTEX-14B4R-0126-SM-5TDE4	Normal(n=712)	2.8883	NA	NA
GTEX-14BIN-0126-SM-5TDCG	Normal(n=712)	2.81701	NA	NA
GTEX-14BMU-0226-SM-5S2QA	Normal(n=712)	2.57289	NA	NA
GTEX-14BMV-0726-SM-73KVE	Normal(n=712)	2.80715	NA	NA
GTEX-14C38-0826-SM-5S2U8	Normal(n=712)	2.49211	NA	NA
GTEX-14C39-0226-SM-5TDDW	Normal(n=712)	2.46597	NA	NA
GTEX-14C5O-0826-SM-5TDEG	Normal(n=712)	2.73401	NA	NA
GTEX-14DAQ-0826-SM-73KWT	Normal(n=712)	2.87303	NA	NA
GTEX-14E6C-2626-SM-5RQJP	Normal(n=712)	2.86513	NA	NA
GTEX-14E6E-0326-SM-73KY6	Normal(n=712)	2.8168	NA	NA
GTEX-14E7W-0926-SM-5YYA4	Normal(n=712)	2.72901	NA	NA
GTEX-14ICK-1626-SM-6ETZX	Normal(n=712)	2.47041	NA	NA
GTEX-14ICL-0426-SM-5RQJ3	Normal(n=712)	2.95921	NA	NA
GTEX-14JG6-1326-SM-9OSXU	Normal(n=712)	2.89588	NA	NA
GTEX-14JIY-1226-SM-6871R	Normal(n=712)	2.48491	NA	NA
GTEX-14PHW-2926-SM-6AJBA	Normal(n=712)	2.4898	NA	NA
GTEX-14PII-0826-SM-6871S	Normal(n=712)	2.78094	NA	NA
GTEX-14PJ3-0126-SM-69LQP	Normal(n=712)	2.92998	NA	NA
GTEX-14PJ4-0326-SM-664OT	Normal(n=712)	2.77231	NA	NA
GTEX-14PJ6-0326-SM-6871H	Normal(n=712)	1.96162	NA	NA
GTEX-14PJM-1326-SM-664NX	Normal(n=712)	2.74803	NA	NA
GTEX-14PJO-0626-SM-6LLHH	Normal(n=712)	3.01596	NA	NA
GTEX-14PK6-0426-SM-6EU1J	Normal(n=712)	2.24458	NA	NA
GTEX-14PKU-0326-SM-6AJA7	Normal(n=712)	2.80302	NA	NA
GTEX-14PKV-0626-SM-6AJA2	Normal(n=712)	2.59694	NA	NA
GTEX-14PN3-0826-SM-69LOS	Normal(n=712)	2.65329	NA	NA
GTEX-14PN4-1526-SM-6871V	Normal(n=712)	2.35163	NA	NA
GTEX-14PQA-1226-SM-6M47A	Normal(n=712)	2.44546	NA	NA
GTEX-14XAO-0426-SM-6AJB6	Normal(n=712)	2.58159	NA	NA
GTEX-15CHC-0126-SM-5YYBA	Normal(n=712)	2.61188	NA	NA
GTEX-15CHQ-0826-SM-69LOT	Normal(n=712)	2.85559	NA	NA
GTEX-15CHR-1726-SM-7DUGW	Normal(n=712)	3.04404	NA	NA
GTEX-15D1Q-0626-SM-6AJAZ	Normal(n=712)	2.81558	NA	NA
GTEX-15DDE-0626-SM-69LOK	Normal(n=712)	2.93772	NA	NA
GTEX-15DZA-0226-SM-7KFS6	Normal(n=712)	2.69733	NA	NA
GTEX-15EO6-0126-SM-6LPKJ	Normal(n=712)	2.67875	NA	NA
GTEX-15ER7-0726-SM-7KUMF	Normal(n=712)	2.73531	NA	NA
GTEX-15ETS-0526-SM-6PAN3	Normal(n=712)	2.93244	NA	NA
GTEX-15EU6-1426-SM-6M48E	Normal(n=712)	2.52707	NA	NA
GTEX-15FZZ-0226-SM-6LLI4	Normal(n=712)	2.41738	NA	NA
GTEX-15G19-0626-SM-6M474	Normal(n=712)	2.31441	NA	NA
GTEX-15G1A-0326-SM-6M467	Normal(n=712)	2.58928	NA	NA
GTEX-15RIE-0426-SM-7KUMH	Normal(n=712)	3.11253	NA	NA
GTEX-15RIF-0326-SM-7KUFR	Normal(n=712)	1.85	NA	NA
GTEX-15RJ7-0326-SM-6M47H	Normal(n=712)	2.63017	NA	NA
GTEX-15RJE-1326-SM-6LPI6	Normal(n=712)	2.77273	NA	NA
GTEX-15SB6-1526-SM-7KUMQ	Normal(n=712)	2.75916	NA	NA
GTEX-15SHU-0726-SM-7KUFI	Normal(n=712)	2.83046	NA	NA
GTEX-15SHV-0426-SM-6M476	Normal(n=712)	2.81865	NA	NA
GTEX-15UF6-1126-SM-6LPJ3	Normal(n=712)	2.543	NA	NA
GTEX-169BO-0326-SM-7EPIM	Normal(n=712)	3.06108	NA	NA
GTEX-16AAH-0326-SM-7DHML	Normal(n=712)	2.4351	NA	NA
GTEX-16BQI-0726-SM-6LPJZ	Normal(n=712)	2.56949	NA	NA
GTEX-16GPK-0926-SM-6LPJ9	Normal(n=712)	2.66993	NA	NA
GTEX-16MT8-0626-SM-6M47Q	Normal(n=712)	2.9692	NA	NA
GTEX-16MTA-0726-SM-7KUL4	Normal(n=712)	2.81885	NA	NA
GTEX-16NGA-0326-SM-718AJ	Normal(n=712)	2.77484	NA	NA
GTEX-16NPX-1426-SM-6LPK3	Normal(n=712)	2.81946	NA	NA
GTEX-16XZY-0726-SM-79OMU	Normal(n=712)	2.9159	NA	NA
GTEX-16XZZ-0826-SM-7IGM3	Normal(n=712)	2.6487	NA	NA
GTEX-16YQH-0326-SM-6LPJV	Normal(n=712)	2.32481	NA	NA
GTEX-16Z82-0426-SM-7EPGX	Normal(n=712)	2.62059	NA	NA
GTEX-178AV-0726-SM-6LPJI	Normal(n=712)	2.84358	NA	NA
GTEX-17EVP-0126-SM-7EPHW	Normal(n=712)	2.88811	NA	NA
GTEX-17EVQ-0526-SM-7KFSK	Normal(n=712)	3.18428	NA	NA
GTEX-17F96-0526-SM-79OLE	Normal(n=712)	2.90111	NA	NA
GTEX-17F97-0626-SM-7IGOH	Normal(n=712)	2.3274	NA	NA
GTEX-17F9E-0626-SM-79ON5	Normal(n=712)	2.65833	NA	NA
GTEX-17F9Y-0526-SM-7EWDC	Normal(n=712)	2.69866	NA	NA
GTEX-17GQL-0226-SM-7LTAK	Normal(n=712)	2.61988	NA	NA
GTEX-17HG3-0226-SM-7EWEA	Normal(n=712)	2.52105	NA	NA
GTEX-17HGU-0826-SM-7EWE5	Normal(n=712)	2.61706	NA	NA
GTEX-17HHE-0426-SM-79OK3	Normal(n=712)	3.31194	NA	NA
GTEX-17HHY-0826-SM-7EPID	Normal(n=712)	2.40654	NA	NA
GTEX-17HII-1926-SM-79OLB	Normal(n=712)	2.50131	NA	NA
GTEX-17JCI-0626-SM-7IGM7	Normal(n=712)	2.44015	NA	NA
GTEX-17KNJ-1026-SM-79ONK	Normal(n=712)	2.87931	NA	NA
GTEX-17MF6-0626-SM-7LT8D	Normal(n=712)	2.78973	NA	NA
GTEX-183FY-0626-SM-79OKR	Normal(n=712)	2.93847	NA	NA
GTEX-183WM-2626-SM-7KFRY	Normal(n=712)	2.14274	NA	NA
GTEX-18465-1426-SM-7KFTF	Normal(n=712)	2.97343	NA	NA
GTEX-18A66-0826-SM-72D5Z	Normal(n=712)	2.97306	NA	NA
GTEX-18A67-0826-SM-7KFTI	Normal(n=712)	2.7721	NA	NA
GTEX-18A6Q-0726-SM-7LT8Y	Normal(n=712)	2.69086	NA	NA
GTEX-18A7A-0826-SM-7KFTJ	Normal(n=712)	2.92752	NA	NA
GTEX-18D9A-0126-SM-7KFSI	Normal(n=712)	2.75039	NA	NA
GTEX-18D9B-0726-SM-72D6K	Normal(n=712)	2.44784	NA	NA
GTEX-18D9U-1026-SM-72D5R	Normal(n=712)	2.92941	NA	NA
GTEX-18QFQ-0726-SM-7LG6D	Normal(n=712)	2.64593	NA	NA
GTEX-1A3MV-0326-SM-73KW7	Normal(n=712)	2.93697	NA	NA
GTEX-1A8FM-0726-SM-7DUGK	Normal(n=712)	2.9241	NA	NA
GTEX-1A8G6-0626-SM-7IGNB	Normal(n=712)	2.56949	NA	NA
GTEX-1A8G7-1026-SM-73KVA	Normal(n=712)	3.11603	NA	NA
GTEX-1AMEY-0126-SM-73KTX	Normal(n=712)	2.33485	NA	NA
GTEX-1AMFI-0526-SM-7189M	Normal(n=712)	3.00827	NA	NA
GTEX-1AX8Z-0826-SM-7DUFZ	Normal(n=712)	2.93941	NA	NA
GTEX-1AX9I-0626-SM-72D54	Normal(n=712)	2.79494	NA	NA
GTEX-1AX9J-2126-SM-731DD	Normal(n=712)	2.50029	NA	NA
GTEX-1AX9K-0626-SM-73KVD	Normal(n=712)	2.86552	NA	NA
GTEX-1AYCT-0226-SM-73KVB	Normal(n=712)	2.94729	NA	NA
GTEX-1B8KE-0626-SM-7189H	Normal(n=712)	2.74222	NA	NA
GTEX-1B8KZ-0426-SM-731DP	Normal(n=712)	3.0757	NA	NA
GTEX-1B8L1-1626-SM-7IGMH	Normal(n=712)	2.73747	NA	NA
GTEX-1B8SF-0626-SM-73KVV	Normal(n=712)	2.92714	NA	NA
GTEX-1B8SG-1126-SM-7IGMT	Normal(n=712)	2.78199	NA	NA
GTEX-1B932-0926-SM-73KUP	Normal(n=712)	3.02733	NA	NA
GTEX-1B933-1026-SM-7P8RO	Normal(n=712)	2.69064	NA	NA
GTEX-1B97I-0326-SM-7DUGB	Normal(n=712)	2.92296	NA	NA
GTEX-1B97J-0626-SM-7P8RU	Normal(n=712)	2.78555	NA	NA
GTEX-1BAJH-0926-SM-79OO6	Normal(n=712)	2.39808	NA	NA
GTEX-1C2JI-0326-SM-7EWFD	Normal(n=712)	2.38819	NA	NA
GTEX-1C475-0226-SM-7MGXM	Normal(n=712)	2.23787	NA	NA
GTEX-1C4CL-0726-SM-7IGP9	Normal(n=712)	2.86394	NA	NA
GTEX-1C64N-1026-SM-79ONM	Normal(n=712)	2.73466	NA	NA
GTEX-1C6VQ-0526-SM-7MGWD	Normal(n=712)	2.15995	NA	NA
GTEX-1C6VR-0426-SM-7IGN6	Normal(n=712)	2.80385	NA	NA
GTEX-1C6VS-0826-SM-7EWEI	Normal(n=712)	2.64731	NA	NA
GTEX-1CAMQ-1126-SM-7EWFE	Normal(n=712)	2.68975	NA	NA
GTEX-1CAMR-0226-SM-7DUGO	Normal(n=712)	2.67965	NA	NA
GTEX-1CAMS-0826-SM-7P8P1	Normal(n=712)	2.54597	NA	NA
GTEX-1CB4E-0326-SM-7MXT3	Normal(n=712)	2.21475	NA	NA
GTEX-1CB4F-0826-SM-793CV	Normal(n=712)	3.0321	NA	NA
GTEX-1CB4G-1526-SM-7P8QG	Normal(n=712)	2.44069	NA	NA
GTEX-1CB4H-0126-SM-7IGN2	Normal(n=712)	2.36653	NA	NA
GTEX-1CB4I-0726-SM-7DUGS	Normal(n=712)	2.97636	NA	NA
GTEX-1CB4J-1426-SM-7MKFR	Normal(n=712)	2.55311	NA	NA
GTEX-1E1VI-0726-SM-7P8QJ	Normal(n=712)	2.50487	NA	NA
GTEX-1EH9U-0926-SM-7EWF1	Normal(n=712)	2.59789	NA	NA
GTEX-1EKGG-0726-SM-7IGPX	Normal(n=712)	2.75018	NA	NA
GTEX-1EMGI-0826-SM-7EPHY	Normal(n=712)	2.89879	NA	NA
GTEX-1EN7A-1026-SM-7IGPZ	Normal(n=712)	3.01525	NA	NA
GTEX-1EU9M-0626-SM-7MXUT	Normal(n=712)	2.79244	NA	NA
GTEX-1EWIQ-0826-SM-7MXTH	Normal(n=712)	2.80509	NA	NA
GTEX-1EX96-0126-SM-9KNVH	Normal(n=712)	2.51854	NA	NA
GTEX-1F48J-0926-SM-7P8PZ	Normal(n=712)	2.54449	NA	NA
GTEX-1F52S-0526-SM-7P8TP	Normal(n=712)	2.70221	NA	NA
GTEX-1F5PL-0826-SM-7MXU7	Normal(n=712)	2.56755	NA	NA
GTEX-1F6IF-1126-SM-9KNV2	Normal(n=712)	2.45786	NA	NA
GTEX-1F75A-0326-SM-7MXTR	Normal(n=712)	2.83005	NA	NA
GTEX-1F75B-0826-SM-9QEIT	Normal(n=712)	2.77947	NA	NA
GTEX-1F75I-0926-SM-7MXUU	Normal(n=712)	2.8211	NA	NA
GTEX-1F88F-0726-SM-7P8R7	Normal(n=712)	2.63599	NA	NA
GTEX-1FIGZ-0226-SM-7P8QR	Normal(n=712)	2.69086	NA	NA
GTEX-1GF9U-0226-SM-7P8TY	Normal(n=712)	2.87145	NA	NA
GTEX-1GF9V-0926-SM-9KNW7	Normal(n=712)	2.92922	NA	NA
GTEX-1GF9W-0626-SM-7MXVJ	Normal(n=712)	1.92752	NA	NA
GTEX-1GF9X-0126-SM-A9G38	Normal(n=712)	3.18634	NA	NA
GTEX-1GL5R-0626-SM-7PBZY	Normal(n=712)	2.98477	NA	NA
GTEX-1GMR3-0726-SM-9WPOF	Normal(n=712)	2.6241	NA	NA
GTEX-1GMR8-0826-SM-9KNUR	Normal(n=712)	2.72988	NA	NA
GTEX-1GMRU-1126-SM-9KNV1	Normal(n=712)	2.91896	NA	NA
GTEX-1GN1U-0826-SM-9WPPX	Normal(n=712)	3.09051	NA	NA
GTEX-1GN1V-0626-SM-7P8QU	Normal(n=712)	2.50589	NA	NA
GTEX-1GN1W-0126-SM-7MXV7	Normal(n=712)	2.4939	NA	NA
GTEX-1GN2E-0826-SM-9WYT8	Normal(n=712)	2.4351	NA	NA
GTEX-1GN73-0826-SM-9OSW4	Normal(n=712)	2.56633	NA	NA
GTEX-1GPI7-0726-SM-9WG84	Normal(n=712)	2.75745	NA	NA
GTEX-1GTWX-0726-SM-9WPPA	Normal(n=712)	2.91896	NA	NA
GTEX-1GZ2Q-0826-SM-7P8TK	Normal(n=712)	2.80777	NA	NA
GTEX-1GZ4H-0226-SM-9JGGJ	Normal(n=712)	1.6884	NA	NA
GTEX-1GZ4I-0626-SM-9WPPN	Normal(n=712)	2.72443	NA	NA
GTEX-1GZHY-1426-SM-9WG5H	Normal(n=712)	2.81229	NA	NA
GTEX-1H11D-0626-SM-9WPQ1	Normal(n=712)	2.87755	NA	NA
GTEX-1H1CY-0726-SM-9OSXX	Normal(n=712)	2.58856	NA	NA
GTEX-1H1DE-0226-SM-ARZN8	Normal(n=712)	2.95196	NA	NA
GTEX-1H1DF-1026-SM-9QEJ1	Normal(n=712)	2.63946	NA	NA
GTEX-1H1DG-0726-SM-A96TN	Normal(n=712)	2.39204	NA	NA
GTEX-1H1E6-0326-SM-9OSWE	Normal(n=712)	2.72465	NA	NA
GTEX-1H1ZS-0726-SM-A9G3K	Normal(n=712)	2.98968	NA	NA
GTEX-1H2FU-0626-SM-9WPPS	Normal(n=712)	2.58664	NA	NA
GTEX-1H3VE-0826-SM-9KNVQ	Normal(n=712)	2.46624	NA	NA
GTEX-1HB9E-0826-SM-CNNQJ	Normal(n=712)	2.22805	NA	NA
GTEX-1HBPH-0926-SM-A9SME	Normal(n=712)	2.42223	NA	NA
GTEX-1HBPI-0826-SM-9WYTX	Normal(n=712)	2.55287	NA	NA
GTEX-1HBPM-0926-SM-ARL9C	Normal(n=712)	2.95568	NA	NA
GTEX-1HBPN-1226-SM-B2LW9	Normal(n=712)	2.41224	NA	NA
GTEX-1HC8U-1226-SM-9WYUW	Normal(n=712)	2.84659	NA	NA
GTEX-1HCU7-0826-SM-B2LX7	Normal(n=712)	2.86493	NA	NA
GTEX-1HCU9-0226-SM-9WPNT	Normal(n=712)	2.80074	NA	NA
GTEX-1HCUA-0126-SM-B2LWC	Normal(n=712)	2.78094	NA	NA
GTEX-1HCVE-0726-SM-A96SH	Normal(n=712)	2.55483	NA	NA
GTEX-1HFI6-1326-SM-A9SL8	Normal(n=712)	2.79181	NA	NA
GTEX-1HFI7-0326-SM-9WPOX	Normal(n=712)	2.59479	NA	NA
GTEX-1HGF4-0726-SM-9WYU9	Normal(n=712)	2.64108	NA	NA
GTEX-1HKZK-0826-SM-A9G2C	Normal(n=712)	2.7941	NA	NA
GTEX-1HR98-0326-SM-CGQEL	Normal(n=712)	2.55385	NA	NA
GTEX-1HR9M-0626-SM-A96S6	Normal(n=712)	2.69555	NA	NA
GTEX-1HSEH-0826-SM-B2LXE	Normal(n=712)	2.82334	NA	NA
GTEX-1HSGN-0726-SM-A9G2F	Normal(n=712)	2.46022	NA	NA
GTEX-1HSKV-1026-SM-B2LWK	Normal(n=712)	2.7137	NA	NA
GTEX-1HSMO-0726-SM-A96TM	Normal(n=712)	2.61753	NA	NA
GTEX-1HSMQ-0526-SM-A96TY	Normal(n=712)	2.76956	NA	NA
GTEX-1HT8W-1526-SM-CE6S3	Normal(n=712)	3.05415	NA	NA
GTEX-1HUB1-1226-SM-B2LWX	Normal(n=712)	2.19975	NA	NA
GTEX-1I19N-0226-SM-CE6ST	Normal(n=712)	2.301	NA	NA
GTEX-1I1GP-0326-SM-CNPQ4	Normal(n=712)	2.73401	NA	NA
GTEX-1I1GQ-0826-SM-CNNQR	Normal(n=712)	2.59168	NA	NA
GTEX-1I1GR-1126-SM-A9G2I	Normal(n=712)	2.75253	NA	NA
GTEX-1I1GS-0726-SM-C1YS7	Normal(n=712)	2.88675	NA	NA
GTEX-1I1GT-0826-SM-B2LWO	Normal(n=712)	2.89821	NA	NA
GTEX-1I1GU-0826-SM-ARZM5	Normal(n=712)	2.88947	NA	NA
GTEX-1I1GV-0726-SM-ARZLY	Normal(n=712)	2.56511	NA	NA
GTEX-1I6K6-0726-SM-B2LX4	Normal(n=712)	2.56535	NA	NA
GTEX-1I6K7-1126-SM-A96SW	Normal(n=712)	2.75425	NA	NA
GTEX-1ICG6-0426-SM-ARU7M	Normal(n=712)	2.77273	NA	NA
GTEX-1ICLY-0726-SM-A96TB	Normal(n=712)	2.31673	NA	NA
GTEX-1ICLZ-0526-SM-ARZM8	Normal(n=712)	2.28599	NA	NA
GTEX-1IDJC-1026-SM-A96T2	Normal(n=712)	2.78031	NA	NA
GTEX-1IDJH-0826-SM-CE6SY	Normal(n=712)	2.66857	NA	NA
GTEX-1IDJU-1626-SM-CJI4B	Normal(n=712)	2.74438	NA	NA
GTEX-1IE54-0926-SM-A9G2Y	Normal(n=712)	2.80488	NA	NA
GTEX-1IGQW-0626-SM-C1YR9	Normal(n=712)	3.14421	NA	NA
GTEX-1IKJJ-1026-SM-A96SQ	Normal(n=712)	2.46179	NA	NA
GTEX-1IKOE-0926-SM-ARU7X	Normal(n=712)	2.68347	NA	NA
GTEX-1IKOH-0626-SM-CJI35	Normal(n=712)	2.65695	NA	NA
GTEX-1IL2U-0826-SM-CL53Q	Normal(n=712)	3.46467	NA	NA
GTEX-1IL2V-0626-SM-ARU7S	Normal(n=712)	3.03351	NA	NA
GTEX-1IOXB-1026-SM-CJI4D	Normal(n=712)	2.80033	NA	NA
GTEX-1IY9M-1026-SM-A96TG	Normal(n=712)	2.33628	NA	NA
GTEX-1J1OQ-0526-SM-A9G2P	Normal(n=712)	2.80488	NA	NA
GTEX-1J1R8-0126-SM-CJI36	Normal(n=712)	2.51071	NA	NA
GTEX-1J8EW-1126-SM-A96T8	Normal(n=712)	2.86651	NA	NA
GTEX-1J8JJ-0726-SM-AHZ3E	Normal(n=712)	3.14486	NA	NA
GTEX-1J8Q3-0226-SM-C1YR4	Normal(n=712)	2.95866	NA	NA
GTEX-1J8QM-0726-SM-CE6RF	Normal(n=712)	2.51475	NA	NA
GTEX-1JJ6O-0626-SM-AHZ3H	Normal(n=712)	2.17664	NA	NA
GTEX-1JJE9-0226-SM-CY8HU	Normal(n=712)	2.54151	NA	NA
GTEX-1JJEA-0626-SM-D3L96	Normal(n=712)	2.95606	NA	NA
GTEX-1JK1U-0326-SM-CXZJH	Normal(n=712)	2.56998	NA	NA
GTEX-1JKYN-1126-SM-CGQG5	Normal(n=712)	2.69086	NA	NA
GTEX-1JKYR-0826-SM-ARU8L	Normal(n=712)	2.87578	NA	NA
GTEX-1JMLX-0826-SM-CNNPP	Normal(n=712)	2.92277	NA	NA
GTEX-1JMPY-0126-SM-CJI39	Normal(n=712)	2.92809	NA	NA
GTEX-1JMPZ-0626-SM-CY8HY	Normal(n=712)	3.00737	NA	NA
GTEX-1JMQJ-2026-SM-CNPP9	Normal(n=712)	2.75061	NA	NA
GTEX-1JMQK-2126-SM-CY8I2	Normal(n=712)	2.6931	NA	NA
GTEX-1JMQL-0926-SM-CJI3F	Normal(n=712)	2.53506	NA	NA
GTEX-1JN6P-0626-SM-ARZN6	Normal(n=712)	2.63413	NA	NA
GTEX-1K2DA-1526-SM-CGQGQ	Normal(n=712)	2.84056	NA	NA
GTEX-1K2DU-0126-SM-E9TIU	Normal(n=712)	2.53705	NA	NA
GTEX-1K9T9-0826-SM-EAZ4X	Normal(n=712)	2.60621	NA	NA
GTEX-1KAFJ-0426-SM-DHXJH	Normal(n=712)	2.46493	NA	NA
GTEX-1KANC-0826-SM-D3LA8	Normal(n=712)	2.58256	NA	NA
GTEX-1KD4Q-1026-SM-CXZKJ	Normal(n=712)	2.80219	NA	NA
GTEX-1KD5A-0426-SM-D4P3X	Normal(n=712)	2.91169	NA	NA
GTEX-1KXAM-1726-SM-D3LAE	Normal(n=712)	2.92448	NA	NA
GTEX-1LB8K-0626-SM-D4P3Z	Normal(n=712)	2.72988	NA	NA
GTEX-1LBAC-0726-SM-D3L9U	Normal(n=712)	2.93923	NA	NA
GTEX-1LG7Y-0626-SM-DHXJM	Normal(n=712)	2.75979	NA	NA
GTEX-1LG7Z-0526-SM-D4P3Q	Normal(n=712)	2.78136	NA	NA
GTEX-1LGOU-0126-SM-EV79W	Normal(n=712)	2.98677	NA	NA
GTEX-1LGRB-1226-SM-CNNPS	Normal(n=712)	2.5373	NA	NA
GTEX-1LH75-0626-SM-DIPG3	Normal(n=712)	2.81701	NA	NA
GTEX-1LSVX-0726-SM-E9TJG	Normal(n=712)	2.04019	NA	NA
GTEX-1LVAM-0826-SM-EV79X	Normal(n=712)	2.61636	NA	NA
GTEX-1LVAN-0726-SM-CNNPF	Normal(n=712)	2.47431	NA	NA
GTEX-1M4P7-0626-SM-EVR51	Normal(n=712)	2.79056	NA	NA
GTEX-1MA7X-0926-SM-DIPEJ	Normal(n=712)	2.74524	NA	NA
GTEX-1MCC2-0526-SM-DHXJS	Normal(n=712)	2.54868	NA	NA
GTEX-1MGNQ-0726-SM-DPRYH	Normal(n=712)	2.83269	NA	NA
GTEX-1MJK2-0826-SM-DTXE8	Normal(n=712)	2.39917	NA	NA
GTEX-1MJK3-0326-SM-DTX96	Normal(n=712)	3.24869	NA	NA
GTEX-1MUQO-0726-SM-E9TJM	Normal(n=712)	2.79556	NA	NA
GTEX-1N5O9-1026-SM-DTX8Y	Normal(n=712)	2.71282	NA	NA
GTEX-1NUQO-0926-SM-DTXEX	Normal(n=712)	3.11686	NA	NA
GTEX-1NV5F-0726-SM-DTXEH	Normal(n=712)	2.42169	NA	NA
GTEX-1O97I-1026-SM-E76PI	Normal(n=712)	2.78304	NA	NA
GTEX-1O9I2-1226-SM-E6CQC	Normal(n=712)	2.10232	NA	NA
GTEX-1OFPY-1526-SM-DTX8R	Normal(n=712)	2.69086	NA	NA
GTEX-1OJC3-0626-SM-E8VMO	Normal(n=712)	2.69109	NA	NA
GTEX-1OJC4-0526-SM-E6CQV	Normal(n=712)	2.17281	NA	NA
GTEX-1P4AB-1126-SM-DTX94	Normal(n=712)	2.96144	NA	NA
GTEX-1PBJI-0726-SM-EXUSQ	Normal(n=712)	2.08066	NA	NA
GTEX-1PBJJ-1926-SM-DTX8T	Normal(n=712)	2.93376	NA	NA
GTEX-1PDJ9-0826-SM-E76PS	Normal(n=712)	2.92296	NA	NA
GTEX-1PFEY-0226-SM-EVR3M	Normal(n=712)	2.90342	NA	NA
GTEX-1PIGE-0726-SM-DPRZD	Normal(n=712)	3.03386	NA	NA
GTEX-1PIIG-2026-SM-EVR43	Normal(n=712)	2.37379	NA	NA
GTEX-1PPGY-1426-SM-EVR3R	Normal(n=712)	2.55262	NA	NA
GTEX-1PPH8-0926-SM-DTX9U	Normal(n=712)	3.05276	NA	NA
GTEX-1PWST-0726-SM-EWRMO	Normal(n=712)	2.87931	NA	NA
GTEX-1QAET-0226-SM-EVR3T	Normal(n=712)	2.78409	NA	NA
GTEX-1QCLY-0826-SM-DTX8A	Normal(n=712)	2.80012	NA	NA
GTEX-1QCLZ-0626-SM-E6CR2	Normal(n=712)	2.88049	NA	NA
GTEX-1QEPI-0726-SM-E76QG	Normal(n=712)	2.87755	NA	NA
GTEX-1QMI2-0826-SM-EXUT4	Normal(n=712)	2.79036	NA	NA
GTEX-1QP28-0626-SM-E76P5	Normal(n=712)	2.76575	NA	NA
GTEX-1QP2A-0626-SM-DTX9C	Normal(n=712)	2.79535	NA	NA
GTEX-1QP66-0326-SM-DTX7V	Normal(n=712)	3.02059	NA	NA
GTEX-1QP67-0326-SM-EVR45	Normal(n=712)	2.99783	NA	NA
GTEX-1QP6S-2526-SM-DTX9Z	Normal(n=712)	3.11487	NA	NA
GTEX-1QP9N-0126-SM-DPRZS	Normal(n=712)	2.79327	NA	NA
GTEX-1QPFJ-0626-SM-DTX7Y	Normal(n=712)	3.14877	NA	NA
GTEX-1QW4Y-0226-SM-EAZ3U	Normal(n=712)	2.918	NA	NA
GTEX-1R46S-0426-SM-EVR48	Normal(n=712)	2.8268	NA	NA
GTEX-1R9JW-0226-SM-EVR4K	Normal(n=712)	3.16253	NA	NA
GTEX-1R9K4-0726-SM-EWRN2	Normal(n=712)	3.0321	NA	NA
GTEX-1R9K5-0726-SM-EAZ4E	Normal(n=712)	3.12035	NA	NA
GTEX-1R9PM-0226-SM-DPRY7	Normal(n=712)	3.22389	NA	NA
GTEX-1RAZA-0826-SM-EAZ4I	Normal(n=712)	3.03016	NA	NA
GTEX-1RAZQ-0926-SM-EAZ4Q	Normal(n=712)	3.18444	NA	NA
GTEX-1RAZR-1126-SM-E6CRC	Normal(n=712)	3.05693	NA	NA
GTEX-1RAZS-1026-SM-E9TID	Normal(n=712)	2.86295	NA	NA
GTEX-1RDX4-0926-SM-E9U6D	Normal(n=712)	3.25142	NA	NA
GTEX-1RMOY-0126-SM-EWRNN	Normal(n=712)	2.88303	NA	NA
GTEX-1RNSC-1126-SM-E9TIP	Normal(n=712)	2.29219	NA	NA
GTEX-1RQEC-1026-SM-EVR5B	Normal(n=712)	2.44546	NA	NA
GTEX-1RQED-0926-SM-EWRNZ	Normal(n=712)	2.5097	NA	NA
GTEX-1S5ZU-0726-SM-EWROH	Normal(n=712)	2.47483	NA	NA
GTEX-1S83E-0726-SM-EV7B6	Normal(n=712)	2.62387	NA	NA
GTEX-N7MS-2326-SM-2HMLD	Normal(n=712)	2.76553	NA	NA
GTEX-NFK9-0726-SM-2HMJW	Normal(n=712)	2.76829	NA	NA
GTEX-O5YV-1526-SM-EV799	Normal(n=712)	2.62223	NA	NA
GTEX-OHPK-2626-SM-2HMK9	Normal(n=712)	2.488	NA	NA
GTEX-OHPL-2626-SM-2HMJA	Normal(n=712)	2.32625	NA	NA
GTEX-OHPM-2626-SM-33HC5	Normal(n=712)	2.95513	NA	NA
GTEX-OIZF-2626-SM-7P8QZ	Normal(n=712)	2.51677	NA	NA
GTEX-OIZG-0226-SM-2TC5L	Normal(n=712)	2.73747	NA	NA
GTEX-OIZI-0726-SM-2XCEI	Normal(n=712)	3.32077	NA	NA
GTEX-OOBJ-2626-SM-2I3F6	Normal(n=712)	2.73509	NA	NA
GTEX-OXRK-0626-SM-2HMJ5	Normal(n=712)	2.49006	NA	NA
GTEX-OXRL-2626-SM-2I3F1	Normal(n=712)	2.29219	NA	NA
GTEX-OXRN-1526-SM-E6CHM	Normal(n=712)	2.27977	NA	NA
GTEX-OXRO-1226-SM-48TDL	Normal(n=712)	3.17616	NA	NA
GTEX-OXRP-0326-SM-33HBJ	Normal(n=712)	2.61046	NA	NA
GTEX-P44G-0626-SM-2I5EO	Normal(n=712)	1.99349	NA	NA
GTEX-P4PQ-2626-SM-33HC9	Normal(n=712)	2.66744	NA	NA
GTEX-P4QS-2626-SM-2I3EV	Normal(n=712)	2.63599	NA	NA
GTEX-P4QT-2626-SM-2I3FM	Normal(n=712)	2.40436	NA	NA
GTEX-P78B-0526-SM-2I5F7	Normal(n=712)	2.54893	NA	NA
GTEX-PLZ4-1226-SM-2I5FE	Normal(n=712)	2.66175	NA	NA
GTEX-POYW-0826-SM-2XCEM	Normal(n=712)	3.21785	NA	NA
GTEX-PWCY-2326-SM-2I3EQ	Normal(n=712)	2.70354	NA	NA
GTEX-PWN1-2626-SM-2I3FH	Normal(n=712)	2.78073	NA	NA
GTEX-PX3G-2626-SM-2I3EG	Normal(n=712)	3.10986	NA	NA
GTEX-Q2AG-0826-SM-2HMKF	Normal(n=712)	2.98441	NA	NA
GTEX-Q2AH-0726-SM-2I3EA	Normal(n=712)	2.64224	NA	NA
GTEX-Q2AI-0326-SM-2I3EK	Normal(n=712)	2.80983	NA	NA
GTEX-Q734-0526-SM-2I3EH	Normal(n=712)	3.04806	NA	NA
GTEX-QDT8-1226-SM-EVR35	Normal(n=712)	3.37726	NA	NA
GTEX-QDVJ-0226-SM-2I5FV	Normal(n=712)	2.27828	NA	NA
GTEX-QDVN-0626-SM-2I3FP	Normal(n=712)	2.82579	NA	NA
GTEX-QEG5-0826-SM-2I5GF	Normal(n=712)	2.64662	NA	NA
GTEX-QEL4-0726-SM-3GIJ5	Normal(n=712)	2.91552	NA	NA
GTEX-QLQ7-0726-SM-2I5G2	Normal(n=712)	2.57337	NA	NA
GTEX-QV31-0726-SM-3GAEG	Normal(n=712)	2.99132	NA	NA
GTEX-QV44-0826-SM-2S1RG	Normal(n=712)	3.02645	NA	NA
GTEX-QXCU-0326-SM-2TC63	Normal(n=712)	3.04771	NA	NA
GTEX-R3RS-0726-SM-3GIJR	Normal(n=712)	2.81639	NA	NA
GTEX-R53T-0526-SM-3GADL	Normal(n=712)	3.13439	NA	NA
GTEX-R55C-0626-SM-2TF4Q	Normal(n=712)	2.87204	NA	NA
GTEX-R55E-0826-SM-2TC5M	Normal(n=712)	2.51854	NA	NA
GTEX-R55G-0726-SM-2TC6J	Normal(n=712)	2.83875	NA	NA
GTEX-REY6-0526-SM-2TF5M	Normal(n=712)	2.64316	NA	NA
GTEX-RM2N-0526-SM-2TF4N	Normal(n=712)	3.21086	NA	NA
GTEX-RN5K-2826-SM-EZ6L3	Normal(n=712)	2.57265	NA	NA
GTEX-RN64-0626-SM-2TC5V	Normal(n=712)	2.47145	NA	NA
GTEX-RNOR-0926-SM-2TF56	Normal(n=712)	2.97049	NA	NA
GTEX-RTLS-0626-SM-5SI7Z	Normal(n=712)	2.80074	NA	NA
GTEX-RU1J-0226-SM-2TF5Y	Normal(n=712)	2.70111	NA	NA
GTEX-RU72-0126-SM-2TF6Z	Normal(n=712)	3.02095	NA	NA
GTEX-RUSQ-1026-SM-2TF6V	Normal(n=712)	2.31296	NA	NA
GTEX-RVPV-1226-SM-2TF73	Normal(n=712)	2.47353	NA	NA
GTEX-RWS6-0626-SM-2XCAS	Normal(n=712)	2.67649	NA	NA
GTEX-RWSA-0826-SM-2XCBF	Normal(n=712)	3.06833	NA	NA
GTEX-S32W-0726-SM-2XCBL	Normal(n=712)	2.47897	NA	NA
GTEX-S341-0226-SM-D4P1Y	Normal(n=712)	2.8538	NA	NA
GTEX-S7SE-0726-SM-2XCD7	Normal(n=712)	3.04771	NA	NA
GTEX-S7SF-0226-SM-5SI7H	Normal(n=712)	2.93244	NA	NA
GTEX-SE5C-0726-SM-4BRWY	Normal(n=712)	2.71326	NA	NA
GTEX-SIU8-0626-SM-2XCDN	Normal(n=712)	3.36877	NA	NA
GTEX-SJXC-0726-SM-2XCFJ	Normal(n=712)	3.38957	NA	NA
GTEX-SN8G-1526-SM-4DM79	Normal(n=712)	2.59741	NA	NA
GTEX-SNOS-0226-SM-32PLR	Normal(n=712)	2.88986	NA	NA
GTEX-SUCS-0226-SM-32PLQ	Normal(n=712)	2.83734	NA	NA
GTEX-T2IS-0626-SM-32QP6	Normal(n=712)	2.70819	NA	NA
GTEX-T5JW-1226-SM-3GACY	Normal(n=712)	2.94336	NA	NA
GTEX-T6MN-0626-SM-32PM9	Normal(n=712)	2.81496	NA	NA
GTEX-T6MO-0226-SM-32QOL	Normal(n=712)	2.57507	NA	NA
GTEX-T8EM-0226-SM-3DB7C	Normal(n=712)	2.86017	NA	NA
GTEX-TKQ1-0126-SM-33HB3	Normal(n=712)	2.77968	NA	NA
GTEX-TMMY-0826-SM-33HB9	Normal(n=712)	2.70775	NA	NA
GTEX-TSE9-0626-SM-3DB8B	Normal(n=712)	2.70797	NA	NA
GTEX-U3ZH-0226-SM-3DB7B	Normal(n=712)	2.6248	NA	NA
GTEX-U3ZM-0126-SM-3DB8M	Normal(n=712)	2.6884	NA	NA
GTEX-U3ZN-0326-SM-3DB86	Normal(n=712)	3.49185	NA	NA
GTEX-U412-0726-SM-EVR2Y	Normal(n=712)	2.70088	NA	NA
GTEX-U4B1-0626-SM-3DB8L	Normal(n=712)	3.02379	NA	NA
GTEX-U8T8-2326-SM-3DB96	Normal(n=712)	2.82782	NA	NA
GTEX-UJMC-0326-SM-3GAE2	Normal(n=712)	3.19865	NA	NA
GTEX-V1D1-0926-SM-4JBHQ	Normal(n=712)	2.85	NA	NA
GTEX-V955-0426-SM-3GAEL	Normal(n=712)	2.86057	NA	NA
GTEX-VJYA-0426-SM-3GIJK	Normal(n=712)	3.1147	NA	NA
GTEX-VUSG-0426-SM-3GIKD	Normal(n=712)	3.28806	NA	NA
GTEX-W5WG-1426-SM-4KKZP	Normal(n=712)	2.53655	NA	NA
GTEX-W5X1-0426-SM-3GILB	Normal(n=712)	2.93734	NA	NA
GTEX-WEY5-0526-SM-3GIKZ	Normal(n=712)	2.91016	NA	NA
GTEX-WFG7-0326-SM-DKPO8	Normal(n=712)	2.8516	NA	NA
GTEX-WFG8-0426-SM-3GILD	Normal(n=712)	2.8341	NA	NA
GTEX-WFJO-0226-SM-3GIKW	Normal(n=712)	2.60526	NA	NA
GTEX-WH7G-0526-SM-3NMBI	Normal(n=712)	2.77505	NA	NA
GTEX-WHPG-0226-SM-3NMB9	Normal(n=712)	2.91858	NA	NA
GTEX-WHSB-1626-SM-3LK6J	Normal(n=712)	2.71392	NA	NA
GTEX-WHSE-0626-SM-4RGNF	Normal(n=712)	2.49006	NA	NA
GTEX-WK11-0926-SM-3NMAU	Normal(n=712)	2.56925	NA	NA
GTEX-WL46-0126-SM-3TW8I	Normal(n=712)	2.52105	NA	NA
GTEX-WOFL-0726-SM-3MJG4	Normal(n=712)	2.52607	NA	NA
GTEX-WRHU-0926-SM-4E3IG	Normal(n=712)	2.92258	NA	NA
GTEX-WVLH-0626-SM-3MJG7	Normal(n=712)	2.73053	NA	NA
GTEX-WWYW-0826-SM-3NB2X	Normal(n=712)	2.54844	NA	NA
GTEX-WXYG-0226-SM-3NB2Y	Normal(n=712)	2.90958	NA	NA
GTEX-WY7C-0226-SM-3NB37	Normal(n=712)	2.8524	NA	NA
GTEX-WYBS-1926-SM-3NM8N	Normal(n=712)	2.36205	NA	NA
GTEX-WYJK-1626-SM-3NM9J	Normal(n=712)	2.97269	NA	NA
GTEX-WYVS-0326-SM-3NM9V	Normal(n=712)	2.91648	NA	NA
GTEX-X15G-0526-SM-3NMB7	Normal(n=712)	3.08593	NA	NA
GTEX-X261-0726-SM-EZ6MH	Normal(n=712)	2.53356	NA	NA
GTEX-X4LF-0426-SM-3NMB5	Normal(n=712)	2.91131	NA	NA
GTEX-X4XX-0926-SM-46MV7	Normal(n=712)	2.76129	NA	NA
GTEX-X4XY-0826-SM-4E3JM	Normal(n=712)	2.83127	NA	NA
GTEX-X5EB-0726-SM-46MVR	Normal(n=712)	3.06299	NA	NA
GTEX-X8HC-0726-SM-46MWG	Normal(n=712)	2.8514	NA	NA
GTEX-XBED-0126-SM-47JY7	Normal(n=712)	2.90939	NA	NA
GTEX-XBEW-0126-SM-4AT66	Normal(n=712)	2.70088	NA	NA
GTEX-XGQ4-0426-SM-4AT4I	Normal(n=712)	2.64293	NA	NA
GTEX-XLM4-0726-SM-4AT64	Normal(n=712)	2.419	NA	NA
GTEX-XMK1-0626-SM-4B65A	Normal(n=712)	2.73617	NA	NA
GTEX-XOT4-1526-SM-EAZ2W	Normal(n=712)	3.00036	NA	NA
GTEX-XUW1-1026-SM-4BONY	Normal(n=712)	2.73162	NA	NA
GTEX-XUZC-0126-SM-4BOO6	Normal(n=712)	2.56096	NA	NA
GTEX-XV7Q-0326-SM-4BRVM	Normal(n=712)	2.51854	NA	NA
GTEX-XXEK-1326-SM-4BRV1	Normal(n=712)	2.93923	NA	NA
GTEX-XYKS-0826-SM-4BRVF	Normal(n=712)	2.77167	NA	NA
GTEX-Y111-1926-SM-4SOIS	Normal(n=712)	2.26303	NA	NA
GTEX-Y114-0626-SM-4TT98	Normal(n=712)	2.87637	NA	NA
GTEX-Y3I4-0226-SM-4TT27	Normal(n=712)	2.36149	NA	NA
GTEX-Y3IK-0526-SM-4WWE3	Normal(n=712)	2.70509	NA	NA
GTEX-Y5LM-0626-SM-4V6G4	Normal(n=712)	2.60502	NA	NA
GTEX-Y5V5-0326-SM-5RQJG	Normal(n=712)	2.46493	NA	NA
GTEX-Y5V6-0526-SM-4VBRV	Normal(n=712)	2.7551	NA	NA
GTEX-Y8E4-0126-SM-4VBQ2	Normal(n=712)	3.08525	NA	NA
GTEX-Y9LG-0426-SM-4VBRT	Normal(n=712)	2.97893	NA	NA
GTEX-YB5E-0626-SM-4VDSE	Normal(n=712)	2.40681	NA	NA
GTEX-YB5K-0526-SM-5LUAS	Normal(n=712)	2.90362	NA	NA
GTEX-YEC3-0826-SM-4WWFP	Normal(n=712)	2.07793	NA	NA
GTEX-YEC4-0626-SM-5CVLU	Normal(n=712)	2.21599	NA	NA
GTEX-YF7O-0726-SM-4W213	Normal(n=712)	2.64731	NA	NA
GTEX-YFC4-2626-SM-5P9FQ	Normal(n=712)	2.75852	NA	NA
GTEX-YFCO-0326-SM-4W1ZP	Normal(n=712)	2.36457	NA	NA
GTEX-YJ89-0726-SM-5P9F7	Normal(n=712)	2.59216	NA	NA
GTEX-Z93S-0526-SM-EVYB4	Normal(n=712)	2.40735	NA	NA
GTEX-Z9EW-0226-SM-5CVM7	Normal(n=712)	2.43616	NA	NA
GTEX-ZA64-0426-SM-5HL96	Normal(n=712)	2.50157	NA	NA
GTEX-ZAB5-0726-SM-5P9JG	Normal(n=712)	3.02503	NA	NA
GTEX-ZAJG-0726-SM-5HL9A	Normal(n=712)	2.63506	NA	NA
GTEX-ZAK1-0726-SM-5HL8Q	Normal(n=712)	2.64016	NA	NA
GTEX-ZC5H-0626-SM-5LU9K	Normal(n=712)	2.8801	NA	NA
GTEX-ZDTS-0926-SM-5YY9D	Normal(n=712)	2.26993	NA	NA
GTEX-ZDXO-1726-SM-5HL6L	Normal(n=712)	3.14421	NA	NA
GTEX-ZDYS-0626-SM-5J2N5	Normal(n=712)	2.68122	NA	NA
GTEX-ZE7O-1126-SM-57WC8	Normal(n=712)	2.93301	NA	NA
GTEX-ZF28-0826-SM-4WKGJ	Normal(n=712)	2.56973	NA	NA
GTEX-ZF29-0726-SM-DO92H	Normal(n=712)	2.58832	NA	NA
GTEX-ZF3C-0826-SM-DO11E	Normal(n=712)	2.6801	NA	NA
GTEX-ZGAY-1026-SM-4WWBR	Normal(n=712)	3.02945	NA	NA
GTEX-ZLFU-0626-SM-4WWBO	Normal(n=712)	2.98149	NA	NA
GTEX-ZLV1-0126-SM-4WWBZ	Normal(n=712)	2.47483	NA	NA
GTEX-ZLWG-0526-SM-4WWFB	Normal(n=712)	2.6325	NA	NA
GTEX-ZPCL-0126-SM-4WWC8	Normal(n=712)	2.5363	NA	NA
GTEX-ZPIC-0226-SM-DO91T	Normal(n=712)	2.81311	NA	NA
GTEX-ZPU1-0426-SM-4WWCA	Normal(n=712)	3.27262	NA	NA
GTEX-ZQG8-0926-SM-57WFF	Normal(n=712)	2.41819	NA	NA
GTEX-ZQUD-0126-SM-7EPIS	Normal(n=712)	3.06074	NA	NA
GTEX-ZT9W-0226-SM-7SB6H	Normal(n=712)	2.35502	NA	NA
GTEX-ZT9X-0226-SM-51MT2	Normal(n=712)	2.47119	NA	NA
GTEX-ZTPG-0826-SM-5DUVC	Normal(n=712)	2.83309	NA	NA
GTEX-ZTSS-0226-SM-59877	Normal(n=712)	2.7761	NA	NA
GTEX-ZTX8-0626-SM-59HKC	Normal(n=712)	2.8506	NA	NA
GTEX-ZUA1-0926-SM-4YCDX	Normal(n=712)	2.82151	NA	NA
GTEX-ZV6S-0226-SM-59HJT	Normal(n=712)	2.63227	NA	NA
GTEX-ZV7C-0126-SM-57WDE	Normal(n=712)	2.68077	NA	NA
GTEX-ZVP2-0426-SM-57WC2	Normal(n=712)	2.55287	NA	NA
GTEX-ZVT3-0726-SM-5GICN	Normal(n=712)	3.41832	NA	NA
GTEX-ZVZP-1026-SM-5GICI	Normal(n=712)	2.42948	NA	NA
GTEX-ZVZQ-0626-SM-59HJU	Normal(n=712)	2.40898	NA	NA
GTEX-ZXG5-0926-SM-5NQ8H	Normal(n=712)	2.62807	NA	NA
GTEX-ZY6K-0226-SM-5SIAY	Normal(n=712)	2.35614	NA	NA
GTEX-ZYFC-0926-SM-5GZWW	Normal(n=712)	2.5799	NA	NA
GTEX-ZYFD-0826-SM-5NQ9A	Normal(n=712)	2.20539	NA	NA
GTEX-ZYFG-0626-SM-5GZYA	Normal(n=712)	2.79805	NA	NA
GTEX-ZYT6-0426-SM-5GID3	Normal(n=712)	2.49493	NA	NA
GTEX-ZYVF-1126-SM-5E458	Normal(n=712)	2.55533	NA	NA
GTEX-ZYW4-1126-SM-5SI99	Normal(n=712)	2.849	NA	NA
GTEX-ZYY3-1926-SM-5GZXS	Normal(n=712)	2.35276	NA	NA
GTEX-ZZ64-0126-SM-5GZXA	Normal(n=712)	2.39259	NA	NA
GTEX-ZZPU-1326-SM-5GZWS	Normal(n=712)	2.67423	NA	NA

## Sheet: ZCCHC7
rownames(datas)	Type	values	times	status
TCGA-IM-A420-01	G1(n=288)	3.92093	NA	NA
TCGA-EM-A3FO-01	G1(n=288)	4.79899	NA	NA
TCGA-EL-A3H7-01	G1(n=288)	3.89248	NA	NA
TCGA-BJ-A0ZC-01	G1(n=288)	4.61994	NA	NA
TCGA-EM-A4FO-01	G1(n=288)	4.09834	NA	NA
TCGA-DJ-A2PO-01	G1(n=288)	4.38231	NA	NA
TCGA-EL-A3ZT-01	G1(n=288)	4.34819	NA	NA
TCGA-DJ-A13O-01	G1(n=288)	4.24898	NA	NA
TCGA-EM-A1CW-01	G1(n=288)	4.11511	NA	NA
TCGA-E3-A3E2-01	G1(n=288)	4.97567	NA	NA
TCGA-E8-A416-01	G1(n=288)	4.79247	NA	NA
TCGA-ET-A2N3-01	G1(n=288)	4.78213	NA	NA
TCGA-DJ-A4V0-01	G1(n=288)	4.28115	NA	NA
TCGA-EL-A3T6-01	G1(n=288)	4.06248	NA	NA
TCGA-ET-A3BO-01	G1(n=288)	4.42461	NA	NA
TCGA-CE-A481-01	G1(n=288)	4.45882	NA	NA
TCGA-E8-A419-01	G1(n=288)	3.67361	NA	NA
TCGA-E8-A438-01	G1(n=288)	3.71354	NA	NA
TCGA-E3-A3E0-01	G1(n=288)	4.97129	NA	NA
TCGA-ET-A3DS-01	G1(n=288)	4.7719	NA	NA
TCGA-DJ-A4UL-01	G1(n=288)	4.41471	NA	NA
TCGA-EM-A2CK-01	G1(n=288)	4.52162	NA	NA
TCGA-J8-A3O1-01	G1(n=288)	5.04365	NA	NA
TCGA-FE-A237-01	G1(n=288)	4.28952	NA	NA
TCGA-EM-A3O8-01	G1(n=288)	4.58786	NA	NA
TCGA-H2-A2K9-01	G1(n=288)	4.92241	NA	NA
TCGA-DJ-A1QM-01	G1(n=288)	4.24363	NA	NA
TCGA-H2-A3RH-01	G1(n=288)	4.69095	NA	NA
TCGA-IM-A41Z-01	G1(n=288)	4.26165	NA	NA
TCGA-IM-A3EB-01	G1(n=288)	4.23382	NA	NA
TCGA-EL-A3ZN-01	G1(n=288)	4.39335	NA	NA
TCGA-EL-A3ZS-01	G1(n=288)	4.49564	NA	NA
TCGA-EL-A3GR-01	G1(n=288)	4.66437	NA	NA
TCGA-ET-A39R-01	G1(n=288)	4.14222	NA	NA
TCGA-ET-A25O-01	G1(n=288)	4.39669	NA	NA
TCGA-BJ-A2N8-01	G1(n=288)	4.64455	NA	NA
TCGA-DJ-A13W-01	G1(n=288)	2.0224	NA	NA
TCGA-EL-A3N2-01	G1(n=288)	4.1971	NA	NA
TCGA-EM-A4FF-01	G1(n=288)	3.98287	NA	NA
TCGA-KS-A4I3-01	G1(n=288)	4.63621	NA	NA
TCGA-EM-A1CV-01	G1(n=288)	4.82996	NA	NA
TCGA-BJ-A3PR-01	G1(n=288)	4.44336	NA	NA
TCGA-BJ-A45J-01	G1(n=288)	4.42726	NA	NA
TCGA-EM-A3SY-01	G1(n=288)	2.70969	NA	NA
TCGA-FK-A3S3-01	G1(n=288)	4.6636	NA	NA
TCGA-FY-A3NP-01	G1(n=288)	4.50786	NA	NA
TCGA-FY-A3BL-01	G1(n=288)	4.21732	NA	NA
TCGA-MK-A4N6-01	G1(n=288)	4.25586	NA	NA
TCGA-E8-A437-01	G1(n=288)	3.91273	NA	NA
TCGA-EM-A3FL-01	G1(n=288)	4.18307	NA	NA
TCGA-J8-A3YH-01	G1(n=288)	4.72533	NA	NA
TCGA-E8-A433-01	G1(n=288)	4.03357	NA	NA
TCGA-E8-A2EA-01	G1(n=288)	3.81885	NA	NA
TCGA-ET-A3BU-01	G1(n=288)	4.52094	NA	NA
TCGA-EL-A4K0-01	G1(n=288)	4.45934	NA	NA
TCGA-DJ-A2PR-01	G1(n=288)	4.73337	NA	NA
TCGA-DJ-A3VJ-01	G1(n=288)	4.39242	NA	NA
TCGA-ET-A3DO-01	G1(n=288)	3.86068	NA	NA
TCGA-DJ-A3UV-01	G1(n=288)	4.52656	NA	NA
TCGA-J8-A3O2-06	G1(n=288)	4.86174	NA	NA
TCGA-IM-A4EB-01	G1(n=288)	3.93028	NA	NA
TCGA-FE-A234-01	G1(n=288)	4.316	NA	NA
TCGA-EM-A2CQ-01	G1(n=288)	4.34589	NA	NA
TCGA-FY-A40K-01	G1(n=288)	4.31307	NA	NA
TCGA-ET-A40P-01	G1(n=288)	4.40263	NA	NA
TCGA-EL-A4KH-01	G1(n=288)	4.03757	NA	NA
TCGA-CE-A27D-01	G1(n=288)	4.62901	NA	NA
TCGA-KS-A4I7-01	G1(n=288)	4.38835	NA	NA
TCGA-EM-A3SZ-01	G1(n=288)	3.86465	NA	NA
TCGA-DJ-A4V4-01	G1(n=288)	4.09802	NA	NA
TCGA-EL-A4KG-01	G1(n=288)	4.13257	NA	NA
TCGA-FE-A3PD-01	G1(n=288)	4.71369	NA	NA
TCGA-ET-A40R-01	G1(n=288)	4.24371	NA	NA
TCGA-EM-A4FK-01	G1(n=288)	4.98282	NA	NA
TCGA-BJ-A2N9-01	G1(n=288)	3.68783	NA	NA
TCGA-EM-A22Q-01	G1(n=288)	3.3808	NA	NA
TCGA-FE-A23A-01	G1(n=288)	3.34548	NA	NA
TCGA-J8-A3O0-01	G1(n=288)	4.64333	NA	NA
TCGA-IM-A3ED-01	G1(n=288)	4.74559	NA	NA
TCGA-BJ-A18Y-01	G1(n=288)	4.57959	NA	NA
TCGA-EL-A3GZ-01	G1(n=288)	4.90039	NA	NA
TCGA-BJ-A0ZJ-01	G1(n=288)	4.69269	NA	NA
TCGA-FE-A232-01	G1(n=288)	3.93801	NA	NA
TCGA-DJ-A3UP-01	G1(n=288)	4.81762	NA	NA
TCGA-DJ-A1QN-01	G1(n=288)	4.50871	NA	NA
TCGA-EM-A3AJ-01	G1(n=288)	4.64029	NA	NA
TCGA-BJ-A45K-01	G1(n=288)	4.56488	NA	NA
TCGA-DJ-A3V2-01	G1(n=288)	4.37787	NA	NA
TCGA-J8-A3O2-01	G1(n=288)	4.75243	NA	NA
TCGA-ET-A3BN-01	G1(n=288)	4.43048	NA	NA
TCGA-FY-A3R9-01	G1(n=288)	3.49756	NA	NA
TCGA-KS-A41J-01	G1(n=288)	3.98555	NA	NA
TCGA-EL-A4K2-01	G1(n=288)	4.40677	NA	NA
TCGA-FY-A3WA-01	G1(n=288)	4.71465	NA	NA
TCGA-DJ-A13S-01	G1(n=288)	3.51881	NA	NA
TCGA-EM-A2P1-06	G1(n=288)	4.15788	NA	NA
TCGA-DJ-A3US-01	G1(n=288)	4.64735	NA	NA
TCGA-ET-A39N-01	G1(n=288)	4.42282	NA	NA
TCGA-EM-A4FV-01	G1(n=288)	4.4565	NA	NA
TCGA-ET-A40T-01	G1(n=288)	4.48425	NA	NA
TCGA-ET-A25J-01	G1(n=288)	4.29423	NA	NA
TCGA-BJ-A28R-01	G1(n=288)	4.41148	NA	NA
TCGA-BJ-A3F0-01	G1(n=288)	3.85741	NA	NA
TCGA-E3-A3E1-01	G1(n=288)	4.43752	NA	NA
TCGA-DJ-A3UM-01	G1(n=288)	4.3914	NA	NA
TCGA-BJ-A291-01	G1(n=288)	3.74953	NA	NA
TCGA-E8-A417-01	G1(n=288)	4.26502	NA	NA
TCGA-FE-A235-01	G1(n=288)	3.70073	NA	NA
TCGA-CE-A483-01	G1(n=288)	4.45633	NA	NA
TCGA-KS-A41F-01	G1(n=288)	3.84298	NA	NA
TCGA-ET-A39S-01	G1(n=288)	4.70273	NA	NA
TCGA-DJ-A3VL-01	G1(n=288)	4.24636	NA	NA
TCGA-ET-A25K-01	G1(n=288)	4.36612	NA	NA
TCGA-ET-A3BS-01	G1(n=288)	4.41874	NA	NA
TCGA-H2-A421-01	G1(n=288)	3.66978	NA	NA
TCGA-KS-A41I-01	G1(n=288)	2.45673	NA	NA
TCGA-EL-A3GO-01	G1(n=288)	4.4851	NA	NA
TCGA-EM-A2CL-01	G1(n=288)	4.91239	NA	NA
TCGA-MK-A4N7-01	G1(n=288)	4.90734	NA	NA
TCGA-CE-A13K-01	G1(n=288)	4.37115	NA	NA
TCGA-DJ-A1QQ-01	G1(n=288)	4.86422	NA	NA
TCGA-EL-A3H3-01	G1(n=288)	4.06108	NA	NA
TCGA-DJ-A4UP-01	G1(n=288)	4.52631	NA	NA
TCGA-DE-A7U5-01	G1(n=288)	3.9955	NA	NA
TCGA-DJ-A3VA-01	G1(n=288)	4.43327	NA	NA
TCGA-DJ-A4UT-01	G1(n=288)	4.13063	NA	NA
TCGA-ET-A25I-01	G1(n=288)	3.28902	NA	NA
TCGA-BJ-A45E-01	G1(n=288)	2.6424	NA	NA
TCGA-EM-A2CT-01	G1(n=288)	5.17528	NA	NA
TCGA-FY-A3ON-01	G1(n=288)	4.90057	NA	NA
TCGA-BJ-A28W-01	G1(n=288)	4.22195	NA	NA
TCGA-EL-A3CX-01	G1(n=288)	3.76104	NA	NA
TCGA-DJ-A4V2-01	G1(n=288)	4.22743	NA	NA
TCGA-ET-A39M-01	G1(n=288)	3.49609	NA	NA
TCGA-FK-A3SB-01	G1(n=288)	4.64939	NA	NA
TCGA-H2-A422-01	G1(n=288)	4.12218	NA	NA
TCGA-DJ-A3UT-01	G1(n=288)	4.10413	NA	NA
TCGA-FK-A3SD-01	G1(n=288)	4.45765	NA	NA
TCGA-FY-A4B0-01	G1(n=288)	4.50696	NA	NA
TCGA-ET-A2MZ-01	G1(n=288)	4.66247	NA	NA
TCGA-E8-A2JQ-01	G1(n=288)	3.60896	NA	NA
TCGA-ET-A39L-01	G1(n=288)	4.72781	NA	NA
TCGA-EM-A3AP-01	G1(n=288)	4.41523	NA	NA
TCGA-MK-A4N9-01	G1(n=288)	4.6229	NA	NA
TCGA-DJ-A2PN-01	G1(n=288)	4.53343	NA	NA
TCGA-E3-A3DY-01	G1(n=288)	4.77969	NA	NA
TCGA-DJ-A3VD-01	G1(n=288)	4.46318	NA	NA
TCGA-ET-A3DP-01	G1(n=288)	4.49002	NA	NA
TCGA-EL-A4JW-01	G1(n=288)	4.16251	NA	NA
TCGA-E8-A415-01	G1(n=288)	4.14313	NA	NA
TCGA-ET-A3DU-01	G1(n=288)	3.19886	NA	NA
TCGA-FK-A3SE-01	G1(n=288)	4.57526	NA	NA
TCGA-DE-A69J-01	G1(n=288)	4.48715	NA	NA
TCGA-EL-A4K4-01	G1(n=288)	4.01739	NA	NA
TCGA-ET-A39I-01	G1(n=288)	4.63513	NA	NA
TCGA-EL-A3CZ-01	G1(n=288)	4.89961	NA	NA
TCGA-DJ-A1QG-01	G1(n=288)	3.52208	NA	NA
TCGA-GE-A2C6-01	G1(n=288)	4.21905	NA	NA
TCGA-DJ-A3UN-01	G1(n=288)	4.61308	NA	NA
TCGA-EL-A3ZP-01	G1(n=288)	4.13874	NA	NA
TCGA-J8-A3YE-01	G1(n=288)	4.41547	NA	NA
TCGA-DJ-A13T-01	G1(n=288)	4.66456	NA	NA
TCGA-EM-A3FQ-01	G1(n=288)	4.63687	NA	NA
TCGA-DJ-A3UY-01	G1(n=288)	4.37837	NA	NA
TCGA-FE-A230-01	G1(n=288)	3.78415	NA	NA
TCGA-EL-A3H1-01	G1(n=288)	4.74536	NA	NA
TCGA-DJ-A2PS-01	G1(n=288)	5.06776	NA	NA
TCGA-EM-A1CU-01	G1(n=288)	4.82126	NA	NA
TCGA-ET-A40Q-01	G1(n=288)	3.75616	NA	NA
TCGA-EL-A3ZH-01	G1(n=288)	4.5379	NA	NA
TCGA-ET-A3BQ-01	G1(n=288)	4.54743	NA	NA
TCGA-ET-A3BX-01	G1(n=288)	4.45385	NA	NA
TCGA-EL-A3ZL-01	G1(n=288)	4.16715	NA	NA
TCGA-EM-A22N-01	G1(n=288)	3.38931	NA	NA
TCGA-BJ-A2N7-01	G1(n=288)	4.57549	NA	NA
TCGA-DJ-A1QD-01	G1(n=288)	4.32236	NA	NA
TCGA-BJ-A45D-01	G1(n=288)	3.64664	NA	NA
TCGA-ET-A2MX-01	G1(n=288)	3.83833	NA	NA
TCGA-EM-A3AN-01	G1(n=288)	4.81127	NA	NA
TCGA-CE-A482-01	G1(n=288)	4.64784	NA	NA
TCGA-FY-A3RA-01	G1(n=288)	4.70924	NA	NA
TCGA-DE-A0Y2-01	G1(n=288)	4.23722	NA	NA
TCGA-BJ-A0ZG-01	G1(n=288)	4.59494	NA	NA
TCGA-DJ-A2PQ-01	G1(n=288)	4.87809	NA	NA
TCGA-DJ-A3VG-01	G1(n=288)	4.31819	NA	NA
TCGA-E8-A434-01	G1(n=288)	4.53858	NA	NA
TCGA-DJ-A2Q6-01	G1(n=288)	4.76332	NA	NA
TCGA-DJ-A2Q1-01	G1(n=288)	3.84217	NA	NA
TCGA-EM-A2P3-01	G1(n=288)	4.66748	NA	NA
TCGA-BJ-A28T-01	G1(n=288)	4.2198	NA	NA
TCGA-ET-A39O-01	G1(n=288)	3.97748	NA	NA
TCGA-EL-A3T1-01	G1(n=288)	3.86592	NA	NA
TCGA-E8-A44M-01	G1(n=288)	3.97612	NA	NA
TCGA-EM-A1CS-01	G1(n=288)	4.48979	NA	NA
TCGA-CE-A485-01	G1(n=288)	4.62487	NA	NA
TCGA-BJ-A0Z3-01	G1(n=288)	4.94065	NA	NA
TCGA-EL-A3ZK-01	G1(n=288)	3.84688	NA	NA
TCGA-EM-A3FJ-01	G1(n=288)	4.84267	NA	NA
TCGA-E8-A44K-01	G1(n=288)	3.68234	NA	NA
TCGA-EL-A3H8-01	G1(n=288)	4.85897	NA	NA
TCGA-BJ-A191-01	G1(n=288)	5.27413	NA	NA
TCGA-FY-A40M-01	G1(n=288)	5.10085	NA	NA
TCGA-EM-A2OZ-01	G1(n=288)	4.51733	NA	NA
TCGA-BJ-A28X-01	G1(n=288)	4.21642	NA	NA
TCGA-EL-A3GW-01	G1(n=288)	4.8697	NA	NA
TCGA-EM-A3FQ-06	G1(n=288)	4.29569	NA	NA
TCGA-IM-A41Y-01	G1(n=288)	4.02171	NA	NA
TCGA-DJ-A13L-01	G1(n=288)	4.20156	NA	NA
TCGA-DO-A1JZ-01	G1(n=288)	5.07472	NA	NA
TCGA-ET-A2MY-01	G1(n=288)	4.01996	NA	NA
TCGA-EL-A3T8-01	G1(n=288)	4.60139	NA	NA
TCGA-ET-A25P-01	G1(n=288)	4.44237	NA	NA
TCGA-EM-A3FK-01	G1(n=288)	5.16477	NA	NA
TCGA-H2-A3RI-01	G1(n=288)	4.25594	NA	NA
TCGA-DJ-A3V8-01	G1(n=288)	4.53328	NA	NA
TCGA-EM-A3SU-06	G1(n=288)	4.30347	NA	NA
TCGA-EL-A3CV-01	G1(n=288)	4.63229	NA	NA
TCGA-BJ-A45F-01	G1(n=288)	3.05308	NA	NA
TCGA-KS-A41L-01	G1(n=288)	4.66871	NA	NA
TCGA-DO-A1K0-01	G1(n=288)	4.2738	NA	NA
TCGA-EM-A3SX-01	G1(n=288)	4.61856	NA	NA
TCGA-ET-A39J-01	G1(n=288)	4.77628	NA	NA
TCGA-L6-A4EP-01	G1(n=288)	4.32102	NA	NA
TCGA-DJ-A13V-01	G1(n=288)	4.95639	NA	NA
TCGA-DE-A2OL-01	G1(n=288)	5.06821	NA	NA
TCGA-FY-A3I4-01	G1(n=288)	4.02063	NA	NA
TCGA-EM-A4FQ-01	G1(n=288)	3.83712	NA	NA
TCGA-EM-A2P1-01	G1(n=288)	4.14941	NA	NA
TCGA-EL-A3GQ-01	G1(n=288)	4.82719	NA	NA
TCGA-EL-A4JV-01	G1(n=288)	4.52771	NA	NA
TCGA-EL-A3D1-01	G1(n=288)	3.61371	NA	NA
TCGA-KS-A4ID-01	G1(n=288)	3.50106	NA	NA
TCGA-FY-A40N-01	G1(n=288)	4.6377	NA	NA
TCGA-FE-A233-01	G1(n=288)	4.47393	NA	NA
TCGA-DJ-A4UW-01	G1(n=288)	4.65459	NA	NA
TCGA-EM-A3AL-01	G1(n=288)	4.62368	NA	NA
TCGA-J8-A3YH-06	G1(n=288)	4.71337	NA	NA
TCGA-FE-A236-01	G1(n=288)	4.53603	NA	NA
TCGA-EM-A3AK-01	G1(n=288)	4.49374	NA	NA
TCGA-KS-A4I9-01	G1(n=288)	3.89107	NA	NA
TCGA-EM-A2CJ-01	G1(n=288)	4.63462	NA	NA
TCGA-CE-A484-01	G1(n=288)	4.52866	NA	NA
TCGA-ET-A25M-01	G1(n=288)	4.26977	NA	NA
TCGA-DJ-A13M-01	G1(n=288)	4.24028	NA	NA
TCGA-ET-A3BP-01	G1(n=288)	4.21549	NA	NA
TCGA-EL-A3TA-01	G1(n=288)	4.30817	NA	NA
TCGA-IM-A3U3-01	G1(n=288)	4.06041	NA	NA
TCGA-EM-A2CP-01	G1(n=288)	4.0303	NA	NA
TCGA-EM-A22L-01	G1(n=288)	4.53511	NA	NA
TCGA-DE-A4M9-01	G1(n=288)	5.38934	NA	NA
TCGA-DJ-A3UK-01	G1(n=288)	4.79244	NA	NA
TCGA-DE-A4MC-01	G1(n=288)	3.67503	NA	NA
TCGA-ET-A3BW-01	G1(n=288)	5.21	NA	NA
TCGA-E8-A413-01	G1(n=288)	4.42276	NA	NA
TCGA-FK-A3SG-01	G1(n=288)	4.29955	NA	NA
TCGA-EM-A22M-01	G1(n=288)	3.30324	NA	NA
TCGA-EL-A3CY-01	G1(n=288)	4.27772	NA	NA
TCGA-FE-A3PB-01	G1(n=288)	3.79499	NA	NA
TCGA-EM-A3AR-01	G1(n=288)	4.84886	NA	NA
TCGA-EM-A3OB-01	G1(n=288)	4.64778	NA	NA
TCGA-DJ-A3UX-01	G1(n=288)	4.64021	NA	NA
TCGA-KS-A4I1-01	G1(n=288)	4.62456	NA	NA
TCGA-EL-A3ZG-01	G1(n=288)	4.50886	NA	NA
TCGA-ET-A3DT-01	G1(n=288)	4.09239	NA	NA
TCGA-EL-A3GX-01	G1(n=288)	4.22344	NA	NA
TCGA-EM-A2OW-01	G1(n=288)	3.45834	NA	NA
TCGA-DJ-A3VE-01	G1(n=288)	4.71227	NA	NA
TCGA-BJ-A2P4-01	G1(n=288)	4.01905	NA	NA
TCGA-EM-A4FU-01	G1(n=288)	3.8793	NA	NA
TCGA-FE-A3PC-01	G1(n=288)	3.79579	NA	NA
TCGA-EM-A3SU-01	G1(n=288)	3.88086	NA	NA
TCGA-EM-A4G1-01	G1(n=288)	4.44184	NA	NA
TCGA-KS-A4IB-01	G1(n=288)	4.02866	NA	NA
TCGA-ET-A3DR-01	G1(n=288)	5.00229	NA	NA
TCGA-ET-A25N-01	G1(n=288)	4.31278	NA	NA
TCGA-CE-A3MD-01	G1(n=288)	4.48884	NA	NA
TCGA-EM-A3FN-01	G1(n=288)	4.09336	NA	NA
TCGA-DJ-A2PX-01	G1(n=288)	4.6256	NA	NA
TCGA-EM-A2P0-01	G1(n=288)	4.69567	NA	NA
TCGA-EL-A3GS-01	G1(n=288)	4.3339	NA	NA
TCGA-EM-A4FR-01	G1(n=288)	3.72129	NA	NA
TCGA-EL-A4KD-01	G1(n=288)	4.20966	NA	NA
TCGA-FE-A238-01	G1(n=288)	4.33932	NA	NA
TCGA-DJ-A3UW-01	G1(n=288)	3.45447	NA	NA
TCGA-EM-A3AQ-01	G1(n=288)	4.34618	NA	NA
TCGA-EL-A4JX-01	G1(n=288)	3.20257	NA	NA
TCGA-EL-A3D5-01	G1(n=288)	3.90086	NA	NA
TCGA-ET-A3DQ-01	G1(n=288)	4.39063	NA	NA
TCGA-FE-A3PA-01	G2(n=52)	4.09731	NA	NA
TCGA-FY-A76V-01	G2(n=52)	4.30816	NA	NA
TCGA-EM-A2CR-01	G2(n=52)	3.54439	NA	NA
TCGA-BJ-A190-01	G2(n=52)	4.63326	NA	NA
TCGA-ET-A3DV-01	G2(n=52)	4.69529	NA	NA
TCGA-DJ-A4UR-01	G2(n=52)	3.88922	NA	NA
TCGA-EM-A3AI-01	G2(n=52)	4.54559	NA	NA
TCGA-EM-A1YD-01	G2(n=52)	4.6478	NA	NA
TCGA-DJ-A2PV-01	G2(n=52)	4.71663	NA	NA
TCGA-EM-A3O6-01	G2(n=52)	4.11167	NA	NA
TCGA-EM-A3FP-01	G2(n=52)	3.65348	NA	NA
TCGA-DJ-A13P-01	G2(n=52)	4.79538	NA	NA
TCGA-EL-A4K9-01	G2(n=52)	4.491	NA	NA
TCGA-EL-A3CL-01	G2(n=52)	4.5398	NA	NA
TCGA-EM-A3OA-01	G2(n=52)	4.50402	NA	NA
TCGA-EL-A3MW-01	G2(n=52)	4.82114	NA	NA
TCGA-DJ-A1QF-01	G2(n=52)	4.36857	NA	NA
TCGA-DJ-A2PP-01	G2(n=52)	4.70326	NA	NA
TCGA-DJ-A2PU-01	G2(n=52)	4.55821	NA	NA
TCGA-ET-A40S-01	G2(n=52)	4.37431	NA	NA
TCGA-BJ-A0ZF-01	G2(n=52)	5.34062	NA	NA
TCGA-EM-A1YA-01	G2(n=52)	3.74124	NA	NA
TCGA-DJ-A3V3-01	G2(n=52)	4.41635	NA	NA
TCGA-BJ-A0ZA-01	G2(n=52)	4.36008	NA	NA
TCGA-BJ-A0Z0-01	G2(n=52)	4.85521	NA	NA
TCGA-EL-A3H2-01	G2(n=52)	4.07641	NA	NA
TCGA-DJ-A2QC-01	G2(n=52)	4.22836	NA	NA
TCGA-EL-A3CN-01	G2(n=52)	3.82376	NA	NA
TCGA-EL-A3GY-01	G2(n=52)	4.51617	NA	NA
TCGA-E8-A432-01	G2(n=52)	4.42086	NA	NA
TCGA-EL-A3T7-01	G2(n=52)	4.48329	NA	NA
TCGA-DJ-A3VM-01	G2(n=52)	3.73358	NA	NA
TCGA-BJ-A28S-01	G2(n=52)	4.6129	NA	NA
TCGA-BJ-A4O9-01	G2(n=52)	4.83834	NA	NA
TCGA-BJ-A0YZ-01	G2(n=52)	4.23551	NA	NA
TCGA-EL-A3ZR-01	G2(n=52)	4.55922	NA	NA
TCGA-EM-A1YB-01	G2(n=52)	2.60573	NA	NA
TCGA-FY-A3W9-01	G2(n=52)	4.57827	NA	NA
TCGA-DJ-A1QL-01	G2(n=52)	4.69645	NA	NA
TCGA-DJ-A1QI-01	G2(n=52)	4.70556	NA	NA
TCGA-EL-A3N3-01	G2(n=52)	3.93387	NA	NA
TCGA-EM-A2OV-01	G2(n=52)	3.45841	NA	NA
TCGA-EL-A3T3-01	G2(n=52)	3.9546	NA	NA
TCGA-CE-A3ME-01	G2(n=52)	4.75145	NA	NA
TCGA-E3-A3E3-01	G2(n=52)	4.28297	NA	NA
TCGA-EM-A22J-01	G2(n=52)	3.6554	NA	NA
TCGA-EL-A3ZQ-01	G2(n=52)	3.40497	NA	NA
TCGA-DJ-A2Q0-01	G2(n=52)	3.02467	NA	NA
TCGA-EM-A2CO-01	G2(n=52)	3.08125	NA	NA
TCGA-EM-A2OY-01	G2(n=52)	2.97862	NA	NA
TCGA-EM-A1YE-01	G2(n=52)	4.41814	NA	NA
TCGA-ET-A4KQ-01	G2(n=52)	4.48954	NA	NA
TCGA-ET-A2N0-01	G3(n=113)	3.29782	NA	NA
TCGA-EM-A1YC-01	G3(n=113)	3.83361	NA	NA
TCGA-MK-A84Z-01	G3(n=113)	4.00603	NA	NA
TCGA-FY-A3NN-01	G3(n=113)	3.87725	NA	NA
TCGA-DJ-A1QO-01	G3(n=113)	4.10341	NA	NA
TCGA-EL-A3GV-01	G3(n=113)	4.33766	NA	NA
TCGA-BJ-A2NA-01	G3(n=113)	4.39019	NA	NA
TCGA-EL-A3CM-01	G3(n=113)	3.87837	NA	NA
TCGA-EM-A3O3-01	G3(n=113)	3.06414	NA	NA
TCGA-FY-A3TY-01	G3(n=113)	4.46705	NA	NA
TCGA-EL-A3D6-01	G3(n=113)	3.86654	NA	NA
TCGA-J8-A3YF-01	G3(n=113)	3.89059	NA	NA
TCGA-ET-A25G-01	G3(n=113)	4.08076	NA	NA
TCGA-EM-A3FR-01	G3(n=113)	5.12028	NA	NA
TCGA-BJ-A3PT-01	G3(n=113)	3.94782	NA	NA
TCGA-DJ-A2Q7-01	G3(n=113)	4.75887	NA	NA
TCGA-FK-A3SH-01	G3(n=113)	4.54238	NA	NA
TCGA-DJ-A13X-01	G3(n=113)	4.60862	NA	NA
TCGA-EL-A3CU-01	G3(n=113)	4.3691	NA	NA
TCGA-J8-A3YD-01	G3(n=113)	4.41354	NA	NA
TCGA-FY-A3YR-01	G3(n=113)	3.75928	NA	NA
TCGA-BJ-A28V-01	G3(n=113)	4.64067	NA	NA
TCGA-E8-A242-01	G3(n=113)	3.92342	NA	NA
TCGA-EL-A3CR-01	G3(n=113)	3.84817	NA	NA
TCGA-FE-A239-01	G3(n=113)	4.77339	NA	NA
TCGA-DE-A69K-01	G3(n=113)	4.73876	NA	NA
TCGA-EL-A3D0-01	G3(n=113)	4.62305	NA	NA
TCGA-EM-A2CM-01	G3(n=113)	3.57225	NA	NA
TCGA-EL-A4K1-01	G3(n=113)	3.08829	NA	NA
TCGA-DJ-A2QA-01	G3(n=113)	3.71852	NA	NA
TCGA-ET-A3BV-01	G3(n=113)	4.31005	NA	NA
TCGA-EL-A4KI-01	G3(n=113)	4.06324	NA	NA
TCGA-DJ-A3VB-01	G3(n=113)	3.98778	NA	NA
TCGA-J8-A3YG-01	G3(n=113)	3.98213	NA	NA
TCGA-EL-A3T2-01	G3(n=113)	4.75652	NA	NA
TCGA-ET-A39K-01	G3(n=113)	4.13669	NA	NA
TCGA-H2-A26U-01	G3(n=113)	3.95438	NA	NA
TCGA-BJ-A45H-01	G3(n=113)	4.47415	NA	NA
TCGA-EM-A2P2-01	G3(n=113)	4.69296	NA	NA
TCGA-EL-A4K7-01	G3(n=113)	4.11143	NA	NA
TCGA-DJ-A3V4-01	G3(n=113)	4.29766	NA	NA
TCGA-FY-A3R8-01	G3(n=113)	4.30184	NA	NA
TCGA-DJ-A3UU-01	G3(n=113)	4.68097	NA	NA
TCGA-DJ-A3UQ-01	G3(n=113)	4.29271	NA	NA
TCGA-ET-A2N4-01	G3(n=113)	4.56031	NA	NA
TCGA-J8-A42S-01	G3(n=113)	4.50895	NA	NA
TCGA-J8-A4HW-01	G3(n=113)	4.73477	NA	NA
TCGA-FK-A4UB-01	G3(n=113)	4.08575	NA	NA
TCGA-DJ-A2PW-01	G3(n=113)	4.17539	NA	NA
TCGA-EL-A3MZ-01	G3(n=113)	3.57514	NA	NA
TCGA-BJ-A45C-01	G3(n=113)	5.11887	NA	NA
TCGA-EL-A3TB-01	G3(n=113)	4.35713	NA	NA
TCGA-BJ-A45G-01	G3(n=113)	4.50195	NA	NA
TCGA-DE-A0XZ-01	G3(n=113)	4.39508	NA	NA
TCGA-BJ-A45I-01	G3(n=113)	3.83908	NA	NA
TCGA-DJ-A2PZ-01	G3(n=113)	4.12132	NA	NA
TCGA-DJ-A3V7-01	G3(n=113)	4.26721	NA	NA
TCGA-DJ-A2Q4-01	G3(n=113)	4.80035	NA	NA
TCGA-DJ-A3UR-01	G3(n=113)	4.76983	NA	NA
TCGA-DJ-A3V5-01	G3(n=113)	4.30072	NA	NA
TCGA-DJ-A1QH-01	G3(n=113)	4.62387	NA	NA
TCGA-BJ-A3PU-01	G3(n=113)	3.8528	NA	NA
TCGA-BJ-A192-01	G3(n=113)	4.4077	NA	NA
TCGA-E8-A414-01	G3(n=113)	4.39902	NA	NA
TCGA-BJ-A0Z5-01	G3(n=113)	3.87649	NA	NA
TCGA-ET-A3DW-01	G3(n=113)	4.22504	NA	NA
TCGA-EM-A22I-01	G3(n=113)	3.72707	NA	NA
TCGA-DJ-A2Q3-01	G3(n=113)	4.40117	NA	NA
TCGA-L6-A4EU-01	G3(n=113)	3.68483	NA	NA
TCGA-DJ-A3UZ-01	G3(n=113)	4.74959	NA	NA
TCGA-DJ-A2PY-01	G3(n=113)	4.65996	NA	NA
TCGA-EL-A3GP-01	G3(n=113)	3.54765	NA	NA
TCGA-EM-A3O7-01	G3(n=113)	4.60644	NA	NA
TCGA-EM-A2CU-01	G3(n=113)	4.26222	NA	NA
TCGA-ET-A4KN-01	G3(n=113)	2.26948	NA	NA
TCGA-FY-A3R7-01	G3(n=113)	4.84418	NA	NA
TCGA-DJ-A2Q2-01	G3(n=113)	4.62648	NA	NA
TCGA-DJ-A1QE-01	G3(n=113)	4.19904	NA	NA
TCGA-DJ-A13U-01	G3(n=113)	4.45902	NA	NA
TCGA-EL-A4JZ-01	G3(n=113)	4.12773	NA	NA
TCGA-J8-A4HW-06	G3(n=113)	4.56385	NA	NA
TCGA-BJ-A0ZE-01	G3(n=113)	3.23447	NA	NA
TCGA-EM-A4FH-01	G3(n=113)	5.0307	NA	NA
TCGA-EL-A3CW-01	G3(n=113)	4.66509	NA	NA
TCGA-EM-A3ST-01	G3(n=113)	4.46624	NA	NA
TCGA-BJ-A290-01	G3(n=113)	4.88005	NA	NA
TCGA-FY-A3I5-01	G3(n=113)	4.48113	NA	NA
TCGA-FY-A4B4-01	G3(n=113)	4.10424	NA	NA
TCGA-FY-A4B3-01	G3(n=113)	4.33571	NA	NA
TCGA-ET-A39P-01	G3(n=113)	4.00272	NA	NA
TCGA-DJ-A13R-01	G3(n=113)	2.46294	NA	NA
TCGA-EL-A3CO-01	G3(n=113)	4.0423	NA	NA
TCGA-KS-A4IC-01	G3(n=113)	4.24511	NA	NA
TCGA-DJ-A2PT-01	G3(n=113)	3.81819	NA	NA
TCGA-ET-A25R-01	G3(n=113)	4.03594	NA	NA
TCGA-EL-A3GU-01	G3(n=113)	3.97417	NA	NA
TCGA-DJ-A2Q9-01	G3(n=113)	4.56828	NA	NA
TCGA-J8-A3NZ-01	G3(n=113)	4.29741	NA	NA
TCGA-E3-A3DZ-01	G3(n=113)	4.66521	NA	NA
TCGA-DJ-A3VI-01	G3(n=113)	4.01816	NA	NA
TCGA-DJ-A3VK-01	G3(n=113)	4.75966	NA	NA
TCGA-BJ-A0Z9-01	G3(n=113)	4.42286	NA	NA
TCGA-EL-A3ZO-01	G3(n=113)	3.64791	NA	NA
TCGA-DE-A4M8-01	G3(n=113)	3.60023	NA	NA
TCGA-BJ-A28Z-01	G3(n=113)	3.57469	NA	NA
TCGA-EL-A3T0-01	G3(n=113)	4.21419	NA	NA
TCGA-DJ-A3V6-01	G3(n=113)	4.06398	NA	NA
TCGA-BJ-A4O8-01	G3(n=113)	4.22204	NA	NA
TCGA-DE-A4MA-01	G3(n=113)	3.47102	NA	NA
TCGA-ET-A2N5-01	G3(n=113)	4.20803	NA	NA
TCGA-ET-A39T-01	G3(n=113)	4.9175	NA	NA
TCGA-L6-A4EQ-01	G3(n=113)	4.44382	NA	NA
TCGA-FY-A3NM-01	G3(n=113)	4.0946	NA	NA
TCGA-KS-A4I5-01	G4(n=57)	4.31011	NA	NA
TCGA-EM-A4FM-01	G4(n=57)	4.00495	NA	NA
TCGA-DJ-A3V9-01	G4(n=57)	4.4048	NA	NA
TCGA-E8-A436-01	G4(n=57)	4.16831	NA	NA
TCGA-EM-A2OX-01	G4(n=57)	4.58684	NA	NA
TCGA-DE-A0Y3-01	G4(n=57)	4.40488	NA	NA
TCGA-EL-A3CT-01	G4(n=57)	4.6189	NA	NA
TCGA-EM-A22O-01	G4(n=57)	3.96997	NA	NA
TCGA-DE-A3KN-01	G4(n=57)	4.43261	NA	NA
TCGA-FE-A22Z-01	G4(n=57)	4.32526	NA	NA
TCGA-E8-A418-01	G4(n=57)	3.83653	NA	NA
TCGA-EL-A3D4-01	G4(n=57)	4.25878	NA	NA
TCGA-EM-A2CN-01	G4(n=57)	4.66965	NA	NA
TCGA-EM-A3AO-01	G4(n=57)	4.31274	NA	NA
TCGA-DJ-A4V5-01	G4(n=57)	4.43233	NA	NA
TCGA-EL-A3H5-01	G4(n=57)	3.2975	NA	NA
TCGA-EL-A3T9-01	G4(n=57)	4.64084	NA	NA
TCGA-EM-A3FM-01	G4(n=57)	3.59965	NA	NA
TCGA-QD-A8IV-01	G4(n=57)	4.51352	NA	NA
TCGA-EM-A2CS-01	G4(n=57)	4.78457	NA	NA
TCGA-EL-A3ZM-01	G4(n=57)	4.05961	NA	NA
TCGA-DJ-A3V0-01	G4(n=57)	3.94292	NA	NA
TCGA-ET-A3BT-01	G4(n=57)	4.56716	NA	NA
TCGA-J8-A4HY-01	G4(n=57)	4.04402	NA	NA
TCGA-EL-A4K6-01	G4(n=57)	3.81964	NA	NA
TCGA-EL-A3MY-01	G4(n=57)	4.33989	NA	NA
TCGA-E8-A3X7-01	G4(n=57)	3.75889	NA	NA
TCGA-BJ-A0ZB-01	G4(n=57)	3.94013	NA	NA
TCGA-EM-A4FN-01	G4(n=57)	3.77312	NA	NA
TCGA-FY-A40L-01	G4(n=57)	3.71047	NA	NA
TCGA-DJ-A3VF-01	G4(n=57)	3.8952	NA	NA
TCGA-BJ-A3EZ-01	G4(n=57)	4.07799	NA	NA
TCGA-DJ-A3UO-01	G4(n=57)	4.51072	NA	NA
TCGA-DE-A4MB-01	G4(n=57)	3.87492	NA	NA
TCGA-DE-A4MD-06	G4(n=57)	3.81869	NA	NA
TCGA-IM-A3U2-01	G4(n=57)	4.0043	NA	NA
TCGA-EM-A2CS-06	G4(n=57)	4.40496	NA	NA
TCGA-DJ-A2Q5-01	G4(n=57)	4.52845	NA	NA
TCGA-BJ-A0ZH-01	G4(n=57)	4.06267	NA	NA
TCGA-DJ-A2QB-01	G4(n=57)	3.73305	NA	NA
TCGA-DJ-A4UQ-01	G4(n=57)	4.82554	NA	NA
TCGA-BJ-A0Z2-01	G4(n=57)	4.90509	NA	NA
TCGA-ET-A25L-01	G4(n=57)	3.69745	NA	NA
TCGA-EL-A3MX-01	G4(n=57)	4.69405	NA	NA
TCGA-L6-A4ET-01	G4(n=57)	4.41955	NA	NA
TCGA-E3-A3E5-01	G4(n=57)	4.5616	NA	NA
TCGA-BJ-A18Z-01	G4(n=57)	4.24739	NA	NA
TCGA-4C-A93U-01	G4(n=57)	3.83417	NA	NA
TCGA-EL-A3CS-01	G4(n=57)	4.68757	NA	NA
TCGA-FY-A3R6-01	G4(n=57)	4.09506	NA	NA
TCGA-DO-A2HM-01	G4(n=57)	4.4801	NA	NA
TCGA-EM-A22P-01	G4(n=57)	4.56179	NA	NA
TCGA-DE-A4MD-01	G4(n=57)	4.64606	NA	NA
TCGA-EM-A22K-01	G4(n=57)	4.45185	NA	NA
TCGA-EM-A1CT-01	G4(n=57)	4.05202	NA	NA
TCGA-FE-A231-01	G4(n=57)	4.37458	NA	NA
TCGA-EL-A3H4-01	G4(n=57)	4.59352	NA	NA
TCGA-ET-A3DW-11	Normal(n=712)	4.53486	NA	NA
TCGA-EL-A3TA-11	Normal(n=712)	4.75174	NA	NA
TCGA-EL-A3T7-11	Normal(n=712)	4.7011	NA	NA
TCGA-BJ-A3PR-11	Normal(n=712)	4.28361	NA	NA
TCGA-DO-A1JZ-11	Normal(n=712)	4.23774	NA	NA
TCGA-BJ-A28W-11	Normal(n=712)	2.81065	NA	NA
TCGA-BJ-A28R-11	Normal(n=712)	4.64676	NA	NA
TCGA-KS-A41I-11	Normal(n=712)	4.63252	NA	NA
TCGA-EL-A3ZG-11	Normal(n=712)	4.66149	NA	NA
TCGA-BJ-A2N7-11	Normal(n=712)	4.93079	NA	NA
TCGA-EL-A3ZQ-11	Normal(n=712)	4.55425	NA	NA
TCGA-EM-A1CV-11	Normal(n=712)	5.00306	NA	NA
TCGA-BJ-A290-11	Normal(n=712)	4.94438	NA	NA
TCGA-EL-A3ZO-11	Normal(n=712)	4.32953	NA	NA
TCGA-EL-A3T8-11	Normal(n=712)	4.9627	NA	NA
TCGA-H2-A3RI-11	Normal(n=712)	4.81006	NA	NA
TCGA-EL-A3N2-11	Normal(n=712)	5.14252	NA	NA
TCGA-BJ-A28X-11	Normal(n=712)	4.80866	NA	NA
TCGA-EM-A1YC-11	Normal(n=712)	4.24922	NA	NA
TCGA-EL-A3MX-11	Normal(n=712)	4.55366	NA	NA
TCGA-ET-A2N5-11	Normal(n=712)	4.96111	NA	NA
TCGA-EL-A3T2-11	Normal(n=712)	4.76464	NA	NA
TCGA-GE-A2C6-11	Normal(n=712)	4.81848	NA	NA
TCGA-ET-A3DP-11	Normal(n=712)	4.3539	NA	NA
TCGA-BJ-A3PU-11	Normal(n=712)	4.98116	NA	NA
TCGA-EL-A3ZH-11	Normal(n=712)	4.62565	NA	NA
TCGA-EL-A3ZP-11	Normal(n=712)	4.75833	NA	NA
TCGA-EL-A3H2-11	Normal(n=712)	4.47298	NA	NA
TCGA-EM-A1CU-11	Normal(n=712)	5.24797	NA	NA
TCGA-EL-A3T3-11	Normal(n=712)	4.50269	NA	NA
TCGA-H2-A2K9-11	Normal(n=712)	4.90473	NA	NA
TCGA-EM-A3ST-11	Normal(n=712)	4.48941	NA	NA
TCGA-EL-A3H7-11	Normal(n=712)	4.46623	NA	NA
TCGA-EL-A3T6-11	Normal(n=712)	4.34603	NA	NA
TCGA-EL-A3MY-11	Normal(n=712)	4.84768	NA	NA
TCGA-EL-A3TB-11	Normal(n=712)	4.56022	NA	NA
TCGA-FY-A3TY-11	Normal(n=712)	4.83649	NA	NA
TCGA-EL-A3T0-11	Normal(n=712)	4.56345	NA	NA
TCGA-BJ-A2N8-11	Normal(n=712)	4.79861	NA	NA
TCGA-BJ-A2NA-11	Normal(n=712)	4.62856	NA	NA
TCGA-EM-A1CS-11	Normal(n=712)	4.55334	NA	NA
TCGA-EL-A3ZR-11	Normal(n=712)	4.67654	NA	NA
TCGA-EL-A3ZS-11	Normal(n=712)	5.24282	NA	NA
TCGA-EM-A1CW-11	Normal(n=712)	5.58238	NA	NA
TCGA-ET-A2MX-11	Normal(n=712)	4.53229	NA	NA
TCGA-EL-A3ZT-11	Normal(n=712)	4.80408	NA	NA
TCGA-KS-A41L-11	Normal(n=712)	4.76057	NA	NA
TCGA-KS-A41J-11	Normal(n=712)	4.86161	NA	NA
TCGA-EM-A1CT-11	Normal(n=712)	4.25324	NA	NA
TCGA-E8-A2JQ-11	Normal(n=712)	5.01116	NA	NA
TCGA-EL-A3N3-11	Normal(n=712)	5.36245	NA	NA
TCGA-EL-A3H1-11	Normal(n=712)	4.50762	NA	NA
TCGA-EL-A3T1-11	Normal(n=712)	4.15002	NA	NA
TCGA-EL-A3MW-11	Normal(n=712)	5.13362	NA	NA
TCGA-EL-A3ZM-11	Normal(n=712)	4.48747	NA	NA
TCGA-BJ-A2N9-11	Normal(n=712)	4.38625	NA	NA
TCGA-EL-A3ZL-11	Normal(n=712)	4.67657	NA	NA
TCGA-EL-A3GZ-11	Normal(n=712)	5.01307	NA	NA
TCGA-EL-A3ZK-11	Normal(n=712)	4.42332	NA	NA
GTEX-111CU-0226-SM-5GZXC	Normal(n=712)	3.30071	NA	NA
GTEX-111FC-1026-SM-5GZX1	Normal(n=712)	4	NA	NA
GTEX-111VG-0526-SM-5N9BW	Normal(n=712)	3.36317	NA	NA
GTEX-111YS-0726-SM-5GZY8	Normal(n=712)	3.57289	NA	NA
GTEX-1122O-0226-SM-5N9DA	Normal(n=712)	3.34752	NA	NA
GTEX-1128S-0126-SM-5H12S	Normal(n=712)	3.99548	NA	NA
GTEX-113JC-0126-SM-5EGJW	Normal(n=712)	3.32135	NA	NA
GTEX-117XS-0526-SM-5987Q	Normal(n=712)	4.18428	NA	NA
GTEX-117YW-0126-SM-5EGGN	Normal(n=712)	3.74631	NA	NA
GTEX-117YX-1226-SM-5H11S	Normal(n=712)	3.80735	NA	NA
GTEX-1192W-0126-SM-5EGGS	Normal(n=712)	3.93452	NA	NA
GTEX-1192X-1126-SM-5EGGU	Normal(n=712)	4.06781	NA	NA
GTEX-11DXX-0226-SM-5P9HL	Normal(n=712)	3.17856	NA	NA
GTEX-11DXY-0426-SM-5H12R	Normal(n=712)	3.66903	NA	NA
GTEX-11DXZ-0926-SM-5N9CG	Normal(n=712)	3.75596	NA	NA
GTEX-11DYG-0826-SM-5N9GH	Normal(n=712)	3.90207	NA	NA
GTEX-11DZ1-2726-SM-5A5KH	Normal(n=712)	4.03034	NA	NA
GTEX-11EI6-0726-SM-59866	Normal(n=712)	4.09255	NA	NA
GTEX-11EM3-0126-SM-5985K	Normal(n=712)	3.51854	NA	NA
GTEX-11EMC-0226-SM-5EGLP	Normal(n=712)	3.8953	NA	NA
GTEX-11EQ8-0826-SM-5N9FG	Normal(n=712)	4.26454	NA	NA
GTEX-11EQ9-0626-SM-5A5K1	Normal(n=712)	3.12978	NA	NA
GTEX-11GS4-0826-SM-5986J	Normal(n=712)	3.72465	NA	NA
GTEX-11GSO-0626-SM-5A5LW	Normal(n=712)	4.24869	NA	NA
GTEX-11GSP-0126-SM-5A5KU	Normal(n=712)	3.47379	NA	NA
GTEX-11I78-0526-SM-5986A	Normal(n=712)	3.41319	NA	NA
GTEX-11LCK-0526-SM-5A5M9	Normal(n=712)	3.61706	NA	NA
GTEX-11NSD-0126-SM-5987F	Normal(n=712)	3.86295	NA	NA
GTEX-11NUK-1026-SM-5HL5J	Normal(n=712)	3.79805	NA	NA
GTEX-11NV4-0626-SM-5N9BR	Normal(n=712)	4.6241	NA	NA
GTEX-11O72-2326-SM-5BC7H	Normal(n=712)	4.21101	NA	NA
GTEX-11OF3-0626-SM-5BC4Y	Normal(n=712)	4.56438	NA	NA
GTEX-11P7K-0226-SM-5986Z	Normal(n=712)	3.48285	NA	NA
GTEX-11P81-0126-SM-5HL5Y	Normal(n=712)	4.0635	NA	NA
GTEX-11P82-0226-SM-5HL4O	Normal(n=712)	3.35205	NA	NA
GTEX-11TT1-1126-SM-5P9GV	Normal(n=712)	3.38874	NA	NA
GTEX-11TTK-0826-SM-5N9EG	Normal(n=712)	4.17153	NA	NA
GTEX-11TUW-0226-SM-5LU8X	Normal(n=712)	3.69822	NA	NA
GTEX-11UD2-0626-SM-5GU6L	Normal(n=712)	3.44679	NA	NA
GTEX-11VI4-0226-SM-5GU6C	Normal(n=712)	3.83794	NA	NA
GTEX-11XUK-0226-SM-5EQLW	Normal(n=712)	4.06867	NA	NA
GTEX-11ZTS-1126-SM-5LU9X	Normal(n=712)	3.51096	NA	NA
GTEX-11ZTT-1026-SM-5EQKF	Normal(n=712)	3.34767	NA	NA
GTEX-11ZVC-0126-SM-5986G	Normal(n=712)	3.86691	NA	NA
GTEX-1211K-0726-SM-5FQUW	Normal(n=712)	3.63923	NA	NA
GTEX-1212Z-0426-SM-5FQT6	Normal(n=712)	3.70708	NA	NA
GTEX-12584-0826-SM-5FQSK	Normal(n=712)	4.16108	NA	NA
GTEX-12696-0326-SM-5EGL4	Normal(n=712)	3.76022	NA	NA
GTEX-1269C-0226-SM-5EGKS	Normal(n=712)	3.6311	NA	NA
GTEX-12BJ1-0426-SM-5FQSO	Normal(n=712)	3.51728	NA	NA
GTEX-12WSC-0826-SM-5EQ5Q	Normal(n=712)	4.01436	NA	NA
GTEX-12WSD-0926-SM-5GCNL	Normal(n=712)	3.91265	NA	NA
GTEX-12WSE-1226-SM-73KUF	Normal(n=712)	3.97361	NA	NA
GTEX-12WSG-0226-SM-5EGIF	Normal(n=712)	3.34752	NA	NA
GTEX-12WSH-0226-SM-5GCOG	Normal(n=712)	4.11437	NA	NA
GTEX-12WSJ-0326-SM-5GCMT	Normal(n=712)	3.15105	NA	NA
GTEX-12WSK-0926-SM-5CVNQ	Normal(n=712)	4.12681	NA	NA
GTEX-12WSL-0626-SM-5GCOY	Normal(n=712)	3.99548	NA	NA
GTEX-12WSN-0726-SM-5GCMS	Normal(n=712)	3.61706	NA	NA
GTEX-12ZZX-1226-SM-5EGHS	Normal(n=712)	3.77821	NA	NA
GTEX-12ZZY-0826-SM-5EQMT	Normal(n=712)	3.88947	NA	NA
GTEX-12ZZZ-1226-SM-59HK1	Normal(n=712)	4.34199	NA	NA
GTEX-13111-0226-SM-5EQ55	Normal(n=712)	3.5656	NA	NA
GTEX-13112-0326-SM-5P9IW	Normal(n=712)	3.90014	NA	NA
GTEX-13113-0126-SM-5LZVX	Normal(n=712)	3.36723	NA	NA
GTEX-1313W-0726-SM-5EGK1	Normal(n=712)	4.02591	NA	NA
GTEX-131XE-0126-SM-5LZVC	Normal(n=712)	3.68482	NA	NA
GTEX-131XF-1826-SM-5EGKG	Normal(n=712)	3.34213	NA	NA
GTEX-131XG-0226-SM-5IFG1	Normal(n=712)	3.56071	NA	NA
GTEX-131XH-0526-SM-5DUX7	Normal(n=712)	3.97453	NA	NA
GTEX-131YS-0726-SM-5P9G9	Normal(n=712)	3.79181	NA	NA
GTEX-132AR-1126-SM-5P9GA	Normal(n=712)	3.58256	NA	NA
GTEX-132NY-1026-SM-5P9IY	Normal(n=712)	3.848	NA	NA
GTEX-132QS-0326-SM-5IJFN	Normal(n=712)	3.46467	NA	NA
GTEX-133LE-0326-SM-5P9G4	Normal(n=712)	3.36443	NA	NA
GTEX-1399R-0126-SM-5IFEV	Normal(n=712)	3.76447	NA	NA
GTEX-1399T-0126-SM-5KM15	Normal(n=712)	4.1102	NA	NA
GTEX-1399U-0326-SM-5P9G5	Normal(n=712)	3.74093	NA	NA
GTEX-139T6-0326-SM-5J2LY	Normal(n=712)	3.72901	NA	NA
GTEX-139TS-0126-SM-5K7XJ	Normal(n=712)	3.97085	NA	NA
GTEX-139UW-0126-SM-5KM1B	Normal(n=712)	3.74846	NA	NA
GTEX-139YR-1226-SM-5IFEU	Normal(n=712)	3.86394	NA	NA
GTEX-13CF3-0926-SM-5LZZC	Normal(n=712)	3.55827	NA	NA
GTEX-13D11-0226-SM-5LZXL	Normal(n=712)	3.26228	NA	NA
GTEX-13FH7-0126-SM-5KLZ1	Normal(n=712)	3.45483	NA	NA
GTEX-13FHO-0926-SM-5N9EW	Normal(n=712)	3.93357	NA	NA
GTEX-13FHP-0926-SM-5L3EC	Normal(n=712)	4.08491	NA	NA
GTEX-13FLV-0226-SM-5J2OF	Normal(n=712)	3.83592	NA	NA
GTEX-13FLW-0326-SM-5J2M4	Normal(n=712)	4.10266	NA	NA
GTEX-13FTW-0626-SM-5IFEX	Normal(n=712)	3.43216	NA	NA
GTEX-13FTY-0726-SM-5J2OH	Normal(n=712)	3.82579	NA	NA
GTEX-13FXS-0726-SM-5LZXJ	Normal(n=712)	3.92884	NA	NA
GTEX-13G51-1226-SM-5K7Z3	Normal(n=712)	3.94767	NA	NA
GTEX-13IVO-0926-SM-5KLZP	Normal(n=712)	4.20163	NA	NA
GTEX-13JVG-0926-SM-5IJE1	Normal(n=712)	3.88557	NA	NA
GTEX-13N11-1026-SM-5K7XQ	Normal(n=712)	3.99277	NA	NA
GTEX-13N1W-0826-SM-5MR5J	Normal(n=712)	4.02591	NA	NA
GTEX-13N2G-0726-SM-5MR38	Normal(n=712)	3.76871	NA	NA
GTEX-13NYB-0726-SM-5MR4J	Normal(n=712)	3.9364	NA	NA
GTEX-13NYC-2426-SM-5MR3K	Normal(n=712)	4.24869	NA	NA
GTEX-13NZ8-0226-SM-5J2OK	Normal(n=712)	4.28318	NA	NA
GTEX-13NZ9-1126-SM-5MR37	Normal(n=712)	4.16108	NA	NA
GTEX-13NZA-1026-SM-5MR48	Normal(n=712)	3.63807	NA	NA
GTEX-13O1R-0826-SM-5J2MB	Normal(n=712)	3.47768	NA	NA
GTEX-13O21-2226-SM-5MR3L	Normal(n=712)	3.53356	NA	NA
GTEX-13O3O-0926-SM-5KM1F	Normal(n=712)	3.87086	NA	NA
GTEX-13O3P-0726-SM-5J2OM	Normal(n=712)	3.96625	NA	NA
GTEX-13O3Q-0626-SM-5IJG1	Normal(n=712)	4.02059	NA	NA
GTEX-13O61-0226-SM-5KM52	Normal(n=712)	3.39985	NA	NA
GTEX-13OVG-0226-SM-5LU93	Normal(n=712)	3.51979	NA	NA
GTEX-13OVI-0826-SM-5KLZ8	Normal(n=712)	3.59455	NA	NA
GTEX-13OVJ-0626-SM-5J2O2	Normal(n=712)	3.58496	NA	NA
GTEX-13OVK-0226-SM-6M472	Normal(n=712)	3.94205	NA	NA
GTEX-13OW5-0626-SM-5J2N2	Normal(n=712)	3.83086	NA	NA
GTEX-13OW6-0726-SM-5L3FX	Normal(n=712)	3.99729	NA	NA
GTEX-13OW7-0826-SM-5L3EL	Normal(n=712)	4.06867	NA	NA
GTEX-13OW8-0126-SM-5IJE5	Normal(n=712)	3.77505	NA	NA
GTEX-13PDP-1026-SM-5L3FA	Normal(n=712)	4.60229	NA	NA
GTEX-13PL6-1026-SM-5L3E5	Normal(n=712)	4.38957	NA	NA
GTEX-13PVQ-0726-SM-5L3GI	Normal(n=712)	3.85898	NA	NA
GTEX-13PVR-0626-SM-5S2RC	Normal(n=712)	3.4489	NA	NA
GTEX-13QBU-0626-SM-5J2OG	Normal(n=712)	3.18222	NA	NA
GTEX-13QJ3-0926-SM-73KX5	Normal(n=712)	4.39985	NA	NA
GTEX-13QJC-0826-SM-5RQKC	Normal(n=712)	3.72574	NA	NA
GTEX-13RTJ-0326-SM-5YYAE	Normal(n=712)	4.05137	NA	NA
GTEX-13RTK-0326-SM-5RQHS	Normal(n=712)	3.41278	NA	NA
GTEX-13S86-1126-SM-5RQJX	Normal(n=712)	3.57531	NA	NA
GTEX-13U4I-0526-SM-5LU59	Normal(n=712)	3.80941	NA	NA
GTEX-13VXT-0626-SM-5SIA1	Normal(n=712)	4.08576	NA	NA
GTEX-13VXU-0826-SM-5KLZ2	Normal(n=712)	4.02768	NA	NA
GTEX-13W46-0926-SM-5LU3T	Normal(n=712)	4.13422	NA	NA
GTEX-13X6H-0526-SM-5LU4Q	Normal(n=712)	3.62644	NA	NA
GTEX-13X6J-0826-SM-5LU32	Normal(n=712)	3.91456	NA	NA
GTEX-13YAN-0926-SM-5O9C3	Normal(n=712)	3.93263	NA	NA
GTEX-144GL-1226-SM-5O9A4	Normal(n=712)	4.10518	NA	NA
GTEX-144GM-0226-SM-5Q5CB	Normal(n=712)	3.488	NA	NA
GTEX-144GO-0126-SM-5LUAO	Normal(n=712)	4.27873	NA	NA
GTEX-145LT-0226-SM-5S2QK	Normal(n=712)	3.23481	NA	NA
GTEX-145LU-0426-SM-5O9AH	Normal(n=712)	3.63343	NA	NA
GTEX-145ME-0126-SM-5S2QM	Normal(n=712)	3.47249	NA	NA
GTEX-145MG-0826-SM-5Q5C2	Normal(n=712)	4.20398	NA	NA
GTEX-145MH-0426-SM-5LU8T	Normal(n=712)	4.22188	NA	NA
GTEX-145MI-1126-SM-5O9AK	Normal(n=712)	4.43095	NA	NA
GTEX-146FQ-0726-SM-5LUA7	Normal(n=712)	3.57531	NA	NA
GTEX-146FR-0326-SM-5SI8U	Normal(n=712)	4.06953	NA	NA
GTEX-14753-0926-SM-5Q5BI	Normal(n=712)	4.06437	NA	NA
GTEX-1477Z-0226-SM-5TDCI	Normal(n=712)	4.1102	NA	NA
GTEX-147F4-0826-SM-5QGRB	Normal(n=712)	3.98185	NA	NA
GTEX-147GR-0726-SM-5S2PL	Normal(n=712)	3.85	NA	NA
GTEX-148VI-0526-SM-5TDDG	Normal(n=712)	3.66562	NA	NA
GTEX-148VJ-0726-SM-5LU8J	Normal(n=712)	3.51979	NA	NA
GTEX-1497J-0126-SM-5Q5BK	Normal(n=712)	3.35007	NA	NA
GTEX-14A5H-0726-SM-5Q5DW	Normal(n=712)	3.58976	NA	NA
GTEX-14A6H-2426-SM-5Q5BO	Normal(n=712)	4.22959	NA	NA
GTEX-14ABY-0926-SM-5Q5DY	Normal(n=712)	4.02503	NA	NA
GTEX-14AS3-0226-SM-5Q5B6	Normal(n=712)	3.98732	NA	NA
GTEX-14ASI-0726-SM-5Q5DC	Normal(n=712)	4.03122	NA	NA
GTEX-14B4R-0126-SM-5TDE4	Normal(n=712)	3.63575	NA	NA
GTEX-14BIN-0126-SM-5TDCG	Normal(n=712)	3.9607	NA	NA
GTEX-14BMU-0226-SM-5S2QA	Normal(n=712)	3.36163	NA	NA
GTEX-14BMV-0726-SM-73KVE	Normal(n=712)	3.90111	NA	NA
GTEX-14C38-0826-SM-5S2U8	Normal(n=712)	3.85798	NA	NA
GTEX-14C39-0226-SM-5TDDW	Normal(n=712)	3.84499	NA	NA
GTEX-14C5O-0826-SM-5TDEG	Normal(n=712)	3.99548	NA	NA
GTEX-14DAQ-0826-SM-73KWT	Normal(n=712)	4.10014	NA	NA
GTEX-14E6C-2626-SM-5RQJP	Normal(n=712)	3.774	NA	NA
GTEX-14E6E-0326-SM-73KY6	Normal(n=712)	3.98459	NA	NA
GTEX-14E7W-0926-SM-5YYA4	Normal(n=712)	3.87283	NA	NA
GTEX-14ICK-1626-SM-6ETZX	Normal(n=712)	3.44612	NA	NA
GTEX-14ICL-0426-SM-5RQJ3	Normal(n=712)	3.95513	NA	NA
GTEX-14JG6-1326-SM-9OSXU	Normal(n=712)	3.51349	NA	NA
GTEX-14JIY-1226-SM-6871R	Normal(n=712)	4.0045	NA	NA
GTEX-14PHW-2926-SM-6AJBA	Normal(n=712)	4.0018	NA	NA
GTEX-14PII-0826-SM-6871S	Normal(n=712)	4.11353	NA	NA
GTEX-14PJ3-0126-SM-69LQP	Normal(n=712)	3.39835	NA	NA
GTEX-14PJ4-0326-SM-664OT	Normal(n=712)	3.56316	NA	NA
GTEX-14PJ6-0326-SM-6871H	Normal(n=712)	2.83915	NA	NA
GTEX-14PJM-1326-SM-664NX	Normal(n=712)	3.92315	NA	NA
GTEX-14PJO-0626-SM-6LLHH	Normal(n=712)	3.68145	NA	NA
GTEX-14PK6-0426-SM-6EU1J	Normal(n=712)	3.5435	NA	NA
GTEX-14PKU-0326-SM-6AJA7	Normal(n=712)	3.60288	NA	NA
GTEX-14PKV-0626-SM-6AJA2	Normal(n=712)	3.44215	NA	NA
GTEX-14PN3-0826-SM-69LOS	Normal(n=712)	3.64962	NA	NA
GTEX-14PN4-1526-SM-6871V	Normal(n=712)	3.93452	NA	NA
GTEX-14PQA-1226-SM-6M47A	Normal(n=712)	4.29205	NA	NA
GTEX-14XAO-0426-SM-6AJB6	Normal(n=712)	3.48929	NA	NA
GTEX-15CHC-0126-SM-5YYBA	Normal(n=712)	3.50589	NA	NA
GTEX-15CHQ-0826-SM-69LOT	Normal(n=712)	3.86888	NA	NA
GTEX-15CHR-1726-SM-7DUGW	Normal(n=712)	3.77083	NA	NA
GTEX-15D1Q-0626-SM-6AJAZ	Normal(n=712)	4.12681	NA	NA
GTEX-15DDE-0626-SM-69LOK	Normal(n=712)	4.22805	NA	NA
GTEX-15DZA-0226-SM-7KFS6	Normal(n=712)	3.72137	NA	NA
GTEX-15EO6-0126-SM-6LPKJ	Normal(n=712)	4.05745	NA	NA
GTEX-15ER7-0726-SM-7KUMF	Normal(n=712)	3.91648	NA	NA
GTEX-15ETS-0526-SM-6PAN3	Normal(n=712)	3.80839	NA	NA
GTEX-15EU6-1426-SM-6M48E	Normal(n=712)	3.774	NA	NA
GTEX-15FZZ-0226-SM-6LLI4	Normal(n=712)	3.37393	NA	NA
GTEX-15G19-0626-SM-6M474	Normal(n=712)	3.81147	NA	NA
GTEX-15G1A-0326-SM-6M467	Normal(n=712)	3.40163	NA	NA
GTEX-15RIE-0426-SM-7KUMH	Normal(n=712)	3.94017	NA	NA
GTEX-15RIF-0326-SM-7KUFR	Normal(n=712)	2.76065	NA	NA
GTEX-15RJ7-0326-SM-6M47H	Normal(n=712)	3.26198	NA	NA
GTEX-15RJE-1326-SM-6LPI6	Normal(n=712)	3.54597	NA	NA
GTEX-15SB6-1526-SM-7KUMQ	Normal(n=712)	3.65992	NA	NA
GTEX-15SHU-0726-SM-7KUFI	Normal(n=712)	3.91073	NA	NA
GTEX-15SHV-0426-SM-6M476	Normal(n=712)	4.17473	NA	NA
GTEX-15UF6-1126-SM-6LPJ3	Normal(n=712)	4.0072	NA	NA
GTEX-169BO-0326-SM-7EPIM	Normal(n=712)	3.48929	NA	NA
GTEX-16AAH-0326-SM-7DHML	Normal(n=712)	3.3099	NA	NA
GTEX-16BQI-0726-SM-6LPJZ	Normal(n=712)	3.7845	NA	NA
GTEX-16GPK-0926-SM-6LPJ9	Normal(n=712)	3.8166	NA	NA
GTEX-16MT8-0626-SM-6M47Q	Normal(n=712)	3.8885	NA	NA
GTEX-16MTA-0726-SM-7KUL4	Normal(n=712)	3.62293	NA	NA
GTEX-16NGA-0326-SM-718AJ	Normal(n=712)	3.82883	NA	NA
GTEX-16NPX-1426-SM-6LPK3	Normal(n=712)	3.92695	NA	NA
GTEX-16XZY-0726-SM-79OMU	Normal(n=712)	3.69933	NA	NA
GTEX-16XZZ-0826-SM-7IGM3	Normal(n=712)	3.63691	NA	NA
GTEX-16YQH-0326-SM-6LPJV	Normal(n=712)	3.93546	NA	NA
GTEX-16Z82-0426-SM-7EPGX	Normal(n=712)	3.96717	NA	NA
GTEX-178AV-0726-SM-6LPJI	Normal(n=712)	3.60999	NA	NA
GTEX-17EVP-0126-SM-7EPHW	Normal(n=712)	3.89433	NA	NA
GTEX-17EVQ-0526-SM-7KFSK	Normal(n=712)	4.1635	NA	NA
GTEX-17F96-0526-SM-79OLE	Normal(n=712)	4.27426	NA	NA
GTEX-17F97-0626-SM-7IGOH	Normal(n=712)	4.20398	NA	NA
GTEX-17F9E-0626-SM-79ON5	Normal(n=712)	3.79494	NA	NA
GTEX-17F9Y-0526-SM-7EWDC	Normal(n=712)	4.42559	NA	NA
GTEX-17GQL-0226-SM-7LTAK	Normal(n=712)	3.49697	NA	NA
GTEX-17HG3-0226-SM-7EWEA	Normal(n=712)	3.73335	NA	NA
GTEX-17HGU-0826-SM-7EWE5	Normal(n=712)	3.92979	NA	NA
GTEX-17HHE-0426-SM-79OK3	Normal(n=712)	4.03914	NA	NA
GTEX-17HHY-0826-SM-7EPID	Normal(n=712)	4.01614	NA	NA
GTEX-17HII-1926-SM-79OLB	Normal(n=712)	4.31832	NA	NA
GTEX-17JCI-0626-SM-7IGM7	Normal(n=712)	3.36191	NA	NA
GTEX-17KNJ-1026-SM-79ONK	Normal(n=712)	3.68818	NA	NA
GTEX-17MF6-0626-SM-7LT8D	Normal(n=712)	3.63343	NA	NA
GTEX-183FY-0626-SM-79OKR	Normal(n=712)	3.853	NA	NA
GTEX-183WM-2626-SM-7KFRY	Normal(n=712)	3.83996	NA	NA
GTEX-18465-1426-SM-7KFTF	Normal(n=712)	4.27873	NA	NA
GTEX-18A66-0826-SM-72D5Z	Normal(n=712)	3.93923	NA	NA
GTEX-18A67-0826-SM-7KFTI	Normal(n=712)	3.48027	NA	NA
GTEX-18A6Q-0726-SM-7LT8Y	Normal(n=712)	3.69042	NA	NA
GTEX-18A7A-0826-SM-7KFTJ	Normal(n=712)	4.02326	NA	NA
GTEX-18D9A-0126-SM-7KFSI	Normal(n=712)	3.62527	NA	NA
GTEX-18D9B-0726-SM-72D6K	Normal(n=712)	3.68032	NA	NA
GTEX-18D9U-1026-SM-72D5R	Normal(n=712)	3.83491	NA	NA
GTEX-18QFQ-0726-SM-7LG6D	Normal(n=712)	3.66562	NA	NA
GTEX-1A3MV-0326-SM-73KW7	Normal(n=712)	3.51223	NA	NA
GTEX-1A8FM-0726-SM-7DUGK	Normal(n=712)	4.14486	NA	NA
GTEX-1A8G6-0626-SM-7IGNB	Normal(n=712)	3.70155	NA	NA
GTEX-1A8G7-1026-SM-73KVA	Normal(n=712)	4.0036	NA	NA
GTEX-1AMEY-0126-SM-73KTX	Normal(n=712)	3.1127	NA	NA
GTEX-1AMFI-0526-SM-7189M	Normal(n=712)	3.78346	NA	NA
GTEX-1AX8Z-0826-SM-7DUFZ	Normal(n=712)	3.76235	NA	NA
GTEX-1AX9I-0626-SM-72D54	Normal(n=712)	4.28096	NA	NA
GTEX-1AX9J-2126-SM-731DD	Normal(n=712)	3.74201	NA	NA
GTEX-1AX9K-0626-SM-73KVD	Normal(n=712)	3.90881	NA	NA
GTEX-1AYCT-0226-SM-73KVB	Normal(n=712)	3.81558	NA	NA
GTEX-1B8KE-0626-SM-7189H	Normal(n=712)	3.62527	NA	NA
GTEX-1B8KZ-0426-SM-731DP	Normal(n=712)	3.96809	NA	NA
GTEX-1B8L1-1626-SM-7IGMH	Normal(n=712)	3.83491	NA	NA
GTEX-1B8SF-0626-SM-73KVV	Normal(n=712)	3.88557	NA	NA
GTEX-1B8SG-1126-SM-7IGMT	Normal(n=712)	3.81352	NA	NA
GTEX-1B932-0926-SM-73KUP	Normal(n=712)	3.91265	NA	NA
GTEX-1B933-1026-SM-7P8RO	Normal(n=712)	4.02148	NA	NA
GTEX-1B97I-0326-SM-7DUGB	Normal(n=712)	3.82375	NA	NA
GTEX-1B97J-0626-SM-7P8RU	Normal(n=712)	3.78973	NA	NA
GTEX-1BAJH-0926-SM-79OO6	Normal(n=712)	3.87676	NA	NA
GTEX-1C2JI-0326-SM-7EWFD	Normal(n=712)	3.01685	NA	NA
GTEX-1C475-0226-SM-7MGXM	Normal(n=712)	3.25459	NA	NA
GTEX-1C4CL-0726-SM-7IGP9	Normal(n=712)	3.81147	NA	NA
GTEX-1C64N-1026-SM-79ONM	Normal(n=712)	4.18031	NA	NA
GTEX-1C6VQ-0526-SM-7MGWD	Normal(n=712)	3.5509	NA	NA
GTEX-1C6VR-0426-SM-7IGN6	Normal(n=712)	3.9364	NA	NA
GTEX-1C6VS-0826-SM-7EWEI	Normal(n=712)	4.09592	NA	NA
GTEX-1CAMQ-1126-SM-7EWFE	Normal(n=712)	3.88264	NA	NA
GTEX-1CAMR-0226-SM-7DUGO	Normal(n=712)	3.30612	NA	NA
GTEX-1CAMS-0826-SM-7P8P1	Normal(n=712)	3.73985	NA	NA
GTEX-1CB4E-0326-SM-7MXT3	Normal(n=712)	3.17903	NA	NA
GTEX-1CB4F-0826-SM-793CV	Normal(n=712)	4.0635	NA	NA
GTEX-1CB4G-1526-SM-7P8QG	Normal(n=712)	4.21801	NA	NA
GTEX-1CB4H-0126-SM-7IGN2	Normal(n=712)	4.19061	NA	NA
GTEX-1CB4I-0726-SM-7DUGS	Normal(n=712)	3.8748	NA	NA
GTEX-1CB4J-1426-SM-7MKFR	Normal(n=712)	3.9855	NA	NA
GTEX-1E1VI-0726-SM-7P8QJ	Normal(n=712)	3.852	NA	NA
GTEX-1EH9U-0926-SM-7EWF1	Normal(n=712)	3.8125	NA	NA
GTEX-1EKGG-0726-SM-7IGPX	Normal(n=712)	3.69933	NA	NA
GTEX-1EMGI-0826-SM-7EPHY	Normal(n=712)	3.96809	NA	NA
GTEX-1EN7A-1026-SM-7IGPZ	Normal(n=712)	3.55213	NA	NA
GTEX-1EU9M-0626-SM-7MXUT	Normal(n=712)	3.70266	NA	NA
GTEX-1EWIQ-0826-SM-7MXTH	Normal(n=712)	4.2149	NA	NA
GTEX-1EX96-0126-SM-9KNVH	Normal(n=712)	3.98185	NA	NA
GTEX-1F48J-0926-SM-7P8PZ	Normal(n=712)	3.72137	NA	NA
GTEX-1F52S-0526-SM-7P8TP	Normal(n=712)	4.60288	NA	NA
GTEX-1F5PL-0826-SM-7MXU7	Normal(n=712)	3.72683	NA	NA
GTEX-1F6IF-1126-SM-9KNV2	Normal(n=712)	3.7866	NA	NA
GTEX-1F75A-0326-SM-7MXTR	Normal(n=712)	4.17792	NA	NA
GTEX-1F75B-0826-SM-9QEIT	Normal(n=712)	3.99458	NA	NA
GTEX-1F75I-0926-SM-7MXUU	Normal(n=712)	3.44903	NA	NA
GTEX-1F88F-0726-SM-7P8R7	Normal(n=712)	3.7845	NA	NA
GTEX-1FIGZ-0226-SM-7P8QR	Normal(n=712)	3.5008	NA	NA
GTEX-1GF9U-0226-SM-7P8TY	Normal(n=712)	4.1375	NA	NA
GTEX-1GF9V-0926-SM-9KNW7	Normal(n=712)	3.9855	NA	NA
GTEX-1GF9W-0626-SM-7MXVJ	Normal(n=712)	3.69265	NA	NA
GTEX-1GF9X-0126-SM-A9G38	Normal(n=712)	3.58256	NA	NA
GTEX-1GL5R-0626-SM-7PBZY	Normal(n=712)	3.83188	NA	NA
GTEX-1GMR3-0726-SM-9WPOF	Normal(n=712)	3.87578	NA	NA
GTEX-1GMR8-0826-SM-9KNUR	Normal(n=712)	4.06005	NA	NA
GTEX-1GMRU-1126-SM-9KNV1	Normal(n=712)	4.0505	NA	NA
GTEX-1GN1U-0826-SM-9WPPX	Normal(n=712)	4.13832	NA	NA
GTEX-1GN1V-0626-SM-7P8QU	Normal(n=712)	4.18507	NA	NA
GTEX-1GN1W-0126-SM-7MXV7	Normal(n=712)	3.39451	NA	NA
GTEX-1GN2E-0826-SM-9WYT8	Normal(n=712)	4.01792	NA	NA
GTEX-1GN73-0826-SM-9OSW4	Normal(n=712)	3.10249	NA	NA
GTEX-1GPI7-0726-SM-9WG84	Normal(n=712)	3.73552	NA	NA
GTEX-1GTWX-0726-SM-9WPPA	Normal(n=712)	3.77083	NA	NA
GTEX-1GZ2Q-0826-SM-7P8TK	Normal(n=712)	3.99639	NA	NA
GTEX-1GZ4H-0226-SM-9JGGJ	Normal(n=712)	2.22682	NA	NA
GTEX-1GZ4I-0626-SM-9WPPN	Normal(n=712)	3.78555	NA	NA
GTEX-1GZHY-1426-SM-9WG5H	Normal(n=712)	3.65306	NA	NA
GTEX-1H11D-0626-SM-9WPQ1	Normal(n=712)	3.95327	NA	NA
GTEX-1H1CY-0726-SM-9OSXX	Normal(n=712)	4.20242	NA	NA
GTEX-1H1DE-0226-SM-ARZN8	Normal(n=712)	3.61471	NA	NA
GTEX-1H1DF-1026-SM-9QEJ1	Normal(n=712)	4.5373	NA	NA
GTEX-1H1DG-0726-SM-A96TN	Normal(n=712)	3.69042	NA	NA
GTEX-1H1E6-0326-SM-9OSWE	Normal(n=712)	3.44506	NA	NA
GTEX-1H1ZS-0726-SM-A9G3K	Normal(n=712)	3.9542	NA	NA
GTEX-1H2FU-0626-SM-9WPPS	Normal(n=712)	3.57289	NA	NA
GTEX-1H3VE-0826-SM-9KNVQ	Normal(n=712)	3.97911	NA	NA
GTEX-1HB9E-0826-SM-CNNQJ	Normal(n=712)	3.93829	NA	NA
GTEX-1HBPH-0926-SM-A9SME	Normal(n=712)	3.80735	NA	NA
GTEX-1HBPI-0826-SM-9WYTX	Normal(n=712)	3.80426	NA	NA
GTEX-1HBPM-0926-SM-ARL9C	Normal(n=712)	3.66221	NA	NA
GTEX-1HBPN-1226-SM-B2LW9	Normal(n=712)	2.86849	NA	NA
GTEX-1HC8U-1226-SM-9WYUW	Normal(n=712)	3.74416	NA	NA
GTEX-1HCU7-0826-SM-B2LX7	Normal(n=712)	4.0045	NA	NA
GTEX-1HCU9-0226-SM-9WPNT	Normal(n=712)	3.51096	NA	NA
GTEX-1HCUA-0126-SM-B2LWC	Normal(n=712)	3.50716	NA	NA
GTEX-1HCVE-0726-SM-A96SH	Normal(n=712)	3.85	NA	NA
GTEX-1HFI6-1326-SM-A9SL8	Normal(n=712)	4.04439	NA	NA
GTEX-1HFI7-0326-SM-9WPOX	Normal(n=712)	3.19944	NA	NA
GTEX-1HGF4-0726-SM-9WYU9	Normal(n=712)	3.96532	NA	NA
GTEX-1HKZK-0826-SM-A9G2C	Normal(n=712)	3.49442	NA	NA
GTEX-1HR98-0326-SM-CGQEL	Normal(n=712)	4.10685	NA	NA
GTEX-1HR9M-0626-SM-A96S6	Normal(n=712)	4.1235	NA	NA
GTEX-1HSEH-0826-SM-B2LXE	Normal(n=712)	3.67469	NA	NA
GTEX-1HSGN-0726-SM-A9G2F	Normal(n=712)	3.42908	NA	NA
GTEX-1HSKV-1026-SM-B2LWK	Normal(n=712)	3.64039	NA	NA
GTEX-1HSMO-0726-SM-A96TM	Normal(n=712)	4.15704	NA	NA
GTEX-1HSMQ-0526-SM-A96TY	Normal(n=712)	3.87971	NA	NA
GTEX-1HT8W-1526-SM-CE6S3	Normal(n=712)	4.13504	NA	NA
GTEX-1HUB1-1226-SM-B2LWX	Normal(n=712)	3.72356	NA	NA
GTEX-1I19N-0226-SM-CE6ST	Normal(n=712)	3.80735	NA	NA
GTEX-1I1GP-0326-SM-CNPQ4	Normal(n=712)	3.70266	NA	NA
GTEX-1I1GQ-0826-SM-CNNQR	Normal(n=712)	3.61471	NA	NA
GTEX-1I1GR-1126-SM-A9G2I	Normal(n=712)	4.06781	NA	NA
GTEX-1I1GS-0726-SM-C1YS7	Normal(n=712)	3.848	NA	NA
GTEX-1I1GT-0826-SM-B2LWO	Normal(n=712)	3.55336	NA	NA
GTEX-1I1GU-0826-SM-ARZM5	Normal(n=712)	4.08831	NA	NA
GTEX-1I1GV-0726-SM-ARZLY	Normal(n=712)	4.20006	NA	NA
GTEX-1I6K6-0726-SM-B2LX4	Normal(n=712)	4.15866	NA	NA
GTEX-1I6K7-1126-SM-A96SW	Normal(n=712)	3.70708	NA	NA
GTEX-1ICG6-0426-SM-ARU7M	Normal(n=712)	3.32337	NA	NA
GTEX-1ICLY-0726-SM-A96TB	Normal(n=712)	3.70044	NA	NA
GTEX-1ICLZ-0526-SM-ARZM8	Normal(n=712)	3.92979	NA	NA
GTEX-1IDJC-1026-SM-A96T2	Normal(n=712)	3.4452	NA	NA
GTEX-1IDJH-0826-SM-CE6SY	Normal(n=712)	3.51223	NA	NA
GTEX-1IDJU-1626-SM-CJI4B	Normal(n=712)	3.70377	NA	NA
GTEX-1IE54-0926-SM-A9G2Y	Normal(n=712)	4.13996	NA	NA
GTEX-1IGQW-0626-SM-C1YR9	Normal(n=712)	4.1177	NA	NA
GTEX-1IKJJ-1026-SM-A96SQ	Normal(n=712)	3.69042	NA	NA
GTEX-1IKOE-0926-SM-ARU7X	Normal(n=712)	3.70598	NA	NA
GTEX-1IKOH-0626-SM-CJI35	Normal(n=712)	4.22188	NA	NA
GTEX-1IL2U-0826-SM-CL53Q	Normal(n=712)	3.81558	NA	NA
GTEX-1IL2V-0626-SM-ARU7S	Normal(n=712)	4.05224	NA	NA
GTEX-1IOXB-1026-SM-CJI4D	Normal(n=712)	3.87283	NA	NA
GTEX-1IY9M-1026-SM-A96TG	Normal(n=712)	3.851	NA	NA
GTEX-1J1OQ-0526-SM-A9G2P	Normal(n=712)	4.24565	NA	NA
GTEX-1J1R8-0126-SM-CJI36	Normal(n=712)	3.32423	NA	NA
GTEX-1J8EW-1126-SM-A96T8	Normal(n=712)	3.75596	NA	NA
GTEX-1J8JJ-0726-SM-AHZ3E	Normal(n=712)	4.21723	NA	NA
GTEX-1J8Q3-0226-SM-C1YR4	Normal(n=712)	3.7366	NA	NA
GTEX-1J8QM-0726-SM-CE6RF	Normal(n=712)	3.43042	NA	NA
GTEX-1JJ6O-0626-SM-AHZ3H	Normal(n=712)	3.46597	NA	NA
GTEX-1JJE9-0226-SM-CY8HU	Normal(n=712)	4.38405	NA	NA
GTEX-1JJEA-0626-SM-D3L96	Normal(n=712)	3.96993	NA	NA
GTEX-1JK1U-0326-SM-CXZJH	Normal(n=712)	3.41752	NA	NA
GTEX-1JKYN-1126-SM-CGQG5	Normal(n=712)	3.61471	NA	NA
GTEX-1JKYR-0826-SM-ARU8L	Normal(n=712)	3.74524	NA	NA
GTEX-1JMLX-0826-SM-CNNPP	Normal(n=712)	4.14078	NA	NA
GTEX-1JMPY-0126-SM-CJI39	Normal(n=712)	3.51475	NA	NA
GTEX-1JMPZ-0626-SM-CY8HY	Normal(n=712)	3.77926	NA	NA
GTEX-1JMQJ-2026-SM-CNPP9	Normal(n=712)	4.26903	NA	NA
GTEX-1JMQK-2126-SM-CY8I2	Normal(n=712)	3.87971	NA	NA
GTEX-1JMQL-0926-SM-CJI3F	Normal(n=712)	3.7939	NA	NA
GTEX-1JN6P-0626-SM-ARZN6	Normal(n=712)	4.13914	NA	NA
GTEX-1K2DA-1526-SM-CGQGQ	Normal(n=712)	3.72901	NA	NA
GTEX-1K2DU-0126-SM-E9TIU	Normal(n=712)	3.46858	NA	NA
GTEX-1K9T9-0826-SM-EAZ4X	Normal(n=712)	3.82782	NA	NA
GTEX-1KAFJ-0426-SM-DHXJH	Normal(n=712)	3.62994	NA	NA
GTEX-1KANC-0826-SM-D3LA8	Normal(n=712)	3.66562	NA	NA
GTEX-1KD4Q-1026-SM-CXZKJ	Normal(n=712)	3.9982	NA	NA
GTEX-1KD5A-0426-SM-D4P3X	Normal(n=712)	4.11103	NA	NA
GTEX-1KXAM-1726-SM-D3LAE	Normal(n=712)	3.6565	NA	NA
GTEX-1LB8K-0626-SM-D4P3Z	Normal(n=712)	3.93829	NA	NA
GTEX-1LBAC-0726-SM-D3L9U	Normal(n=712)	3.74739	NA	NA
GTEX-1LG7Y-0626-SM-DHXJM	Normal(n=712)	3.98094	NA	NA
GTEX-1LG7Z-0526-SM-D4P3Q	Normal(n=712)	3.57289	NA	NA
GTEX-1LGOU-0126-SM-EV79W	Normal(n=712)	4.0917	NA	NA
GTEX-1LGRB-1226-SM-CNNPS	Normal(n=712)	3.3989	NA	NA
GTEX-1LH75-0626-SM-DIPG3	Normal(n=712)	3.99729	NA	NA
GTEX-1LSVX-0726-SM-E9TJG	Normal(n=712)	3.5472	NA	NA
GTEX-1LVAM-0826-SM-EV79X	Normal(n=712)	3.5008	NA	NA
GTEX-1LVAN-0726-SM-CNNPF	Normal(n=712)	3.77189	NA	NA
GTEX-1M4P7-0626-SM-EVR51	Normal(n=712)	4.23726	NA	NA
GTEX-1MA7X-0926-SM-DIPEJ	Normal(n=712)	3.93734	NA	NA
GTEX-1MCC2-0526-SM-DHXJS	Normal(n=712)	3.2423	NA	NA
GTEX-1MGNQ-0726-SM-DPRYH	Normal(n=712)	3.69153	NA	NA
GTEX-1MJK2-0826-SM-DTXE8	Normal(n=712)	3.97728	NA	NA
GTEX-1MJK3-0326-SM-DTX96	Normal(n=712)	3.79805	NA	NA
GTEX-1MUQO-0726-SM-E9TJM	Normal(n=712)	3.55213	NA	NA
GTEX-1N5O9-1026-SM-DTX8Y	Normal(n=712)	4.20163	NA	NA
GTEX-1NUQO-0926-SM-DTXEX	Normal(n=712)	3.82375	NA	NA
GTEX-1NV5F-0726-SM-DTXEH	Normal(n=712)	3.8339	NA	NA
GTEX-1O97I-1026-SM-E76PI	Normal(n=712)	3.8166	NA	NA
GTEX-1O9I2-1226-SM-E6CQC	Normal(n=712)	3.6017	NA	NA
GTEX-1OFPY-1526-SM-DTX8R	Normal(n=712)	3.62761	NA	NA
GTEX-1OJC3-0626-SM-E8VMO	Normal(n=712)	3.60763	NA	NA
GTEX-1OJC4-0526-SM-E6CQV	Normal(n=712)	3.56316	NA	NA
GTEX-1P4AB-1126-SM-DTX94	Normal(n=712)	4.37782	NA	NA
GTEX-1PBJI-0726-SM-EXUSQ	Normal(n=712)	3.46205	NA	NA
GTEX-1PBJJ-1926-SM-DTX8T	Normal(n=712)	4.0063	NA	NA
GTEX-1PDJ9-0826-SM-E76PS	Normal(n=712)	3.99005	NA	NA
GTEX-1PFEY-0226-SM-EVR3M	Normal(n=712)	3.62994	NA	NA
GTEX-1PIGE-0726-SM-DPRZD	Normal(n=712)	3.78241	NA	NA
GTEX-1PIIG-2026-SM-EVR43	Normal(n=712)	4.04701	NA	NA
GTEX-1PPGY-1426-SM-EVR3R	Normal(n=712)	4.03738	NA	NA
GTEX-1PPH8-0926-SM-DTX9U	Normal(n=712)	3.64616	NA	NA
GTEX-1PWST-0726-SM-EWRMO	Normal(n=712)	3.92029	NA	NA
GTEX-1QAET-0226-SM-EVR3T	Normal(n=712)	3.59455	NA	NA
GTEX-1QCLY-0826-SM-DTX8A	Normal(n=712)	3.40993	NA	NA
GTEX-1QCLZ-0626-SM-E6CR2	Normal(n=712)	4.04527	NA	NA
GTEX-1QEPI-0726-SM-E76QG	Normal(n=712)	3.9644	NA	NA
GTEX-1QMI2-0826-SM-EXUT4	Normal(n=712)	3.94017	NA	NA
GTEX-1QP28-0626-SM-E76P5	Normal(n=712)	3.53854	NA	NA
GTEX-1QP2A-0626-SM-DTX9C	Normal(n=712)	3.62761	NA	NA
GTEX-1QP66-0326-SM-DTX7V	Normal(n=712)	3.89821	NA	NA
GTEX-1QP67-0326-SM-EVR45	Normal(n=712)	3.96993	NA	NA
GTEX-1QP6S-2526-SM-DTX9Z	Normal(n=712)	4.37016	NA	NA
GTEX-1QP9N-0126-SM-DPRZS	Normal(n=712)	3.38267	NA	NA
GTEX-1QPFJ-0626-SM-DTX7Y	Normal(n=712)	3.61589	NA	NA
GTEX-1QW4Y-0226-SM-EAZ3U	Normal(n=712)	4.17233	NA	NA
GTEX-1R46S-0426-SM-EVR48	Normal(n=712)	3.76022	NA	NA
GTEX-1R9JW-0226-SM-EVR4K	Normal(n=712)	3.78241	NA	NA
GTEX-1R9K4-0726-SM-EWRN2	Normal(n=712)	4.15785	NA	NA
GTEX-1R9K5-0726-SM-EAZ4E	Normal(n=712)	3.89918	NA	NA
GTEX-1R9PM-0226-SM-DPRY7	Normal(n=712)	4.1235	NA	NA
GTEX-1RAZA-0826-SM-EAZ4I	Normal(n=712)	3.854	NA	NA
GTEX-1RAZQ-0926-SM-EAZ4Q	Normal(n=712)	3.78764	NA	NA
GTEX-1RAZR-1126-SM-E6CRC	Normal(n=712)	4.01346	NA	NA
GTEX-1RAZS-1026-SM-E9TID	Normal(n=712)	3.84599	NA	NA
GTEX-1RDX4-0926-SM-E9U6D	Normal(n=712)	4.04177	NA	NA
GTEX-1RMOY-0126-SM-EWRNN	Normal(n=712)	3.91169	NA	NA
GTEX-1RNSC-1126-SM-E9TIP	Normal(n=712)	3.52732	NA	NA
GTEX-1RQEC-1026-SM-EVR5B	Normal(n=712)	3.97911	NA	NA
GTEX-1RQED-0926-SM-EWRNZ	Normal(n=712)	3.80941	NA	NA
GTEX-1S5ZU-0726-SM-EWROH	Normal(n=712)	4.44559	NA	NA
GTEX-1S83E-0726-SM-EV7B6	Normal(n=712)	3.72247	NA	NA
GTEX-N7MS-2326-SM-2HMLD	Normal(n=712)	4.17792	NA	NA
GTEX-NFK9-0726-SM-2HMJW	Normal(n=712)	3.35445	NA	NA
GTEX-O5YV-1526-SM-EV799	Normal(n=712)	4.06609	NA	NA
GTEX-OHPK-2626-SM-2HMK9	Normal(n=712)	3.42761	NA	NA
GTEX-OHPL-2626-SM-2HMJA	Normal(n=712)	3.419	NA	NA
GTEX-OHPM-2626-SM-33HC5	Normal(n=712)	4.08491	NA	NA
GTEX-OIZF-2626-SM-7P8QZ	Normal(n=712)	3.44559	NA	NA
GTEX-OIZG-0226-SM-2TC5L	Normal(n=712)	3.25429	NA	NA
GTEX-OIZI-0726-SM-2XCEI	Normal(n=712)	4.45549	NA	NA
GTEX-OOBJ-2626-SM-2I3F6	Normal(n=712)	3.42237	NA	NA
GTEX-OXRK-0626-SM-2HMJ5	Normal(n=712)	3.39369	NA	NA
GTEX-OXRL-2626-SM-2I3F1	Normal(n=712)	3.4019	NA	NA
GTEX-OXRN-1526-SM-E6CHM	Normal(n=712)	3.79805	NA	NA
GTEX-OXRO-1226-SM-48TDL	Normal(n=712)	4.1375	NA	NA
GTEX-OXRP-0326-SM-33HBJ	Normal(n=712)	4.30378	NA	NA
GTEX-P44G-0626-SM-2I5EO	Normal(n=712)	3.61353	NA	NA
GTEX-P4PQ-2626-SM-33HC9	Normal(n=712)	3.70929	NA	NA
GTEX-P4QS-2626-SM-2I3EV	Normal(n=712)	3.27367	NA	NA
GTEX-P4QT-2626-SM-2I3FM	Normal(n=712)	3.23051	NA	NA
GTEX-P78B-0526-SM-2I5F7	Normal(n=712)	3.81762	NA	NA
GTEX-PLZ4-1226-SM-2I5FE	Normal(n=712)	4.27501	NA	NA
GTEX-POYW-0826-SM-2XCEM	Normal(n=712)	4.33342	NA	NA
GTEX-PWCY-2326-SM-2I3EQ	Normal(n=712)	3.47897	NA	NA
GTEX-PWN1-2626-SM-2I3FH	Normal(n=712)	3.3952	NA	NA
GTEX-PX3G-2626-SM-2I3EG	Normal(n=712)	3.54844	NA	NA
GTEX-Q2AG-0826-SM-2HMKF	Normal(n=712)	4.06609	NA	NA
GTEX-Q2AH-0726-SM-2I3EA	Normal(n=712)	3.44917	NA	NA
GTEX-Q2AI-0326-SM-2I3EK	Normal(n=712)	3.5008	NA	NA
GTEX-Q734-0526-SM-2I3EH	Normal(n=712)	3.6565	NA	NA
GTEX-QDT8-1226-SM-EVR35	Normal(n=712)	3.96532	NA	NA
GTEX-QDVJ-0226-SM-2I5FV	Normal(n=712)	3.1478	NA	NA
GTEX-QDVN-0626-SM-2I3FP	Normal(n=712)	3.3274	NA	NA
GTEX-QEG5-0826-SM-2I5GF	Normal(n=712)	3.83794	NA	NA
GTEX-QEL4-0726-SM-3GIJ5	Normal(n=712)	3.78869	NA	NA
GTEX-QLQ7-0726-SM-2I5G2	Normal(n=712)	3.35868	NA	NA
GTEX-QV31-0726-SM-3GAEG	Normal(n=712)	3.66448	NA	NA
GTEX-QV44-0826-SM-2S1RG	Normal(n=712)	4.05832	NA	NA
GTEX-QXCU-0326-SM-2TC63	Normal(n=712)	3.69488	NA	NA
GTEX-R3RS-0726-SM-3GIJR	Normal(n=712)	4.1177	NA	NA
GTEX-R53T-0526-SM-3GADL	Normal(n=712)	3.67129	NA	NA
GTEX-R55C-0626-SM-2TF4Q	Normal(n=712)	3.62644	NA	NA
GTEX-R55E-0826-SM-2TC5M	Normal(n=712)	3.97453	NA	NA
GTEX-R55G-0726-SM-2TC6J	Normal(n=712)	3.93074	NA	NA
GTEX-REY6-0526-SM-2TF5M	Normal(n=712)	3.7939	NA	NA
GTEX-RM2N-0526-SM-2TF4N	Normal(n=712)	3.87873	NA	NA
GTEX-RN5K-2826-SM-EZ6L3	Normal(n=712)	4.37365	NA	NA
GTEX-RN64-0626-SM-2TC5V	Normal(n=712)	4.14405	NA	NA
GTEX-RNOR-0926-SM-2TF56	Normal(n=712)	4.15704	NA	NA
GTEX-RTLS-0626-SM-5SI7Z	Normal(n=712)	3.74953	NA	NA
GTEX-RU1J-0226-SM-2TF5Y	Normal(n=712)	3.85997	NA	NA
GTEX-RU72-0126-SM-2TF6Z	Normal(n=712)	4.13175	NA	NA
GTEX-RUSQ-1026-SM-2TF6V	Normal(n=712)	3.39397	NA	NA
GTEX-RVPV-1226-SM-2TF73	Normal(n=712)	3.80735	NA	NA
GTEX-RWS6-0626-SM-2XCAS	Normal(n=712)	3.63459	NA	NA
GTEX-RWSA-0826-SM-2XCBF	Normal(n=712)	3.7366	NA	NA
GTEX-S32W-0726-SM-2XCBL	Normal(n=712)	3.56803	NA	NA
GTEX-S341-0226-SM-D4P1Y	Normal(n=712)	3.53605	NA	NA
GTEX-S7SE-0726-SM-2XCD7	Normal(n=712)	3.97728	NA	NA
GTEX-S7SF-0226-SM-5SI7H	Normal(n=712)	3.71149	NA	NA
GTEX-SE5C-0726-SM-4BRWY	Normal(n=712)	3.45009	NA	NA
GTEX-SIU8-0626-SM-2XCDN	Normal(n=712)	3.99548	NA	NA
GTEX-SJXC-0726-SM-2XCFJ	Normal(n=712)	4.20555	NA	NA
GTEX-SN8G-1526-SM-4DM79	Normal(n=712)	4.03562	NA	NA
GTEX-SNOS-0226-SM-32PLR	Normal(n=712)	3.49313	NA	NA
GTEX-SUCS-0226-SM-32PLQ	Normal(n=712)	3.45062	NA	NA
GTEX-T2IS-0626-SM-32QP6	Normal(n=712)	4.25852	NA	NA
GTEX-T5JW-1226-SM-3GACY	Normal(n=712)	3.43616	NA	NA
GTEX-T6MN-0626-SM-32PM9	Normal(n=712)	3.96347	NA	NA
GTEX-T6MO-0226-SM-32QOL	Normal(n=712)	3.86691	NA	NA
GTEX-T8EM-0226-SM-3DB7C	Normal(n=712)	3.50208	NA	NA
GTEX-TKQ1-0126-SM-33HB3	Normal(n=712)	3.6427	NA	NA
GTEX-TMMY-0826-SM-33HB9	Normal(n=712)	3.55827	NA	NA
GTEX-TSE9-0626-SM-3DB8B	Normal(n=712)	4.33771	NA	NA
GTEX-U3ZH-0226-SM-3DB7B	Normal(n=712)	3.71589	NA	NA
GTEX-U3ZM-0126-SM-3DB8M	Normal(n=712)	3.51223	NA	NA
GTEX-U3ZN-0326-SM-3DB86	Normal(n=712)	3.83289	NA	NA
GTEX-U412-0726-SM-EVR2Y	Normal(n=712)	4.2211	NA	NA
GTEX-U4B1-0626-SM-3DB8L	Normal(n=712)	3.73552	NA	NA
GTEX-U8T8-2326-SM-3DB96	Normal(n=712)	4.17073	NA	NA
GTEX-UJMC-0326-SM-3GAE2	Normal(n=712)	4.03914	NA	NA
GTEX-V1D1-0926-SM-4JBHQ	Normal(n=712)	3.78136	NA	NA
GTEX-V955-0426-SM-3GAEL	Normal(n=712)	3.80529	NA	NA
GTEX-VJYA-0426-SM-3GIJK	Normal(n=712)	3.62176	NA	NA
GTEX-VUSG-0426-SM-3GIKD	Normal(n=712)	3.85997	NA	NA
GTEX-W5WG-1426-SM-4KKZP	Normal(n=712)	3.38004	NA	NA
GTEX-W5X1-0426-SM-3GILB	Normal(n=712)	4.05398	NA	NA
GTEX-WEY5-0526-SM-3GIKZ	Normal(n=712)	3.40463	NA	NA
GTEX-WFG7-0326-SM-DKPO8	Normal(n=712)	3.53978	NA	NA
GTEX-WFG8-0426-SM-3GILD	Normal(n=712)	3.55459	NA	NA
GTEX-WFJO-0226-SM-3GIKW	Normal(n=712)	3.6837	NA	NA
GTEX-WH7G-0526-SM-3NMBI	Normal(n=712)	3.91552	NA	NA
GTEX-WHPG-0226-SM-3NMB9	Normal(n=712)	3.54597	NA	NA
GTEX-WHSB-1626-SM-3LK6J	Normal(n=712)	3.34752	NA	NA
GTEX-WHSE-0626-SM-4RGNF	Normal(n=712)	4.16672	NA	NA
GTEX-WK11-0926-SM-3NMAU	Normal(n=712)	3.91934	NA	NA
GTEX-WL46-0126-SM-3TW8I	Normal(n=712)	3.91648	NA	NA
GTEX-WOFL-0726-SM-3MJG4	Normal(n=712)	3.74846	NA	NA
GTEX-WRHU-0926-SM-4E3IG	Normal(n=712)	3.72683	NA	NA
GTEX-WVLH-0626-SM-3MJG7	Normal(n=712)	3.99005	NA	NA
GTEX-WWYW-0826-SM-3NB2X	Normal(n=712)	4.25927	NA	NA
GTEX-WXYG-0226-SM-3NB2Y	Normal(n=712)	3.38031	NA	NA
GTEX-WY7C-0226-SM-3NB37	Normal(n=712)	3.42653	NA	NA
GTEX-WYBS-1926-SM-3NM8N	Normal(n=712)	3.85	NA	NA
GTEX-WYJK-1626-SM-3NM9J	Normal(n=712)	3.90881	NA	NA
GTEX-WYVS-0326-SM-3NM9V	Normal(n=712)	3.84097	NA	NA
GTEX-X15G-0526-SM-3NMB7	Normal(n=712)	3.84097	NA	NA
GTEX-X261-0726-SM-EZ6MH	Normal(n=712)	4.24641	NA	NA
GTEX-X4LF-0426-SM-3NMB5	Normal(n=712)	3.42116	NA	NA
GTEX-X4XX-0926-SM-46MV7	Normal(n=712)	3.85898	NA	NA
GTEX-X4XY-0826-SM-4E3JM	Normal(n=712)	3.96347	NA	NA
GTEX-X5EB-0726-SM-46MVR	Normal(n=712)	3.57046	NA	NA
GTEX-X8HC-0726-SM-46MWG	Normal(n=712)	3.90111	NA	NA
GTEX-XBED-0126-SM-47JY7	Normal(n=712)	3.6017	NA	NA
GTEX-XBEW-0126-SM-4AT66	Normal(n=712)	3.36471	NA	NA
GTEX-XGQ4-0426-SM-4AT4I	Normal(n=712)	3.60526	NA	NA
GTEX-XLM4-0726-SM-4AT64	Normal(n=712)	3.99186	NA	NA
GTEX-XMK1-0626-SM-4B65A	Normal(n=712)	3.50843	NA	NA
GTEX-XOT4-1526-SM-EAZ2W	Normal(n=712)	4.07468	NA	NA
GTEX-XUW1-1026-SM-4BONY	Normal(n=712)	3.5741	NA	NA
GTEX-XUZC-0126-SM-4BOO6	Normal(n=712)	3.54226	NA	NA
GTEX-XV7Q-0326-SM-4BRVM	Normal(n=712)	3.81352	NA	NA
GTEX-XXEK-1326-SM-4BRV1	Normal(n=712)	4.05224	NA	NA
GTEX-XYKS-0826-SM-4BRVF	Normal(n=712)	2.82518	NA	NA
GTEX-Y111-1926-SM-4SOIS	Normal(n=712)	3.81044	NA	NA
GTEX-Y114-0626-SM-4TT98	Normal(n=712)	3.6893	NA	NA
GTEX-Y3I4-0226-SM-4TT27	Normal(n=712)	3.5656	NA	NA
GTEX-Y3IK-0526-SM-4WWE3	Normal(n=712)	3.47897	NA	NA
GTEX-Y5LM-0626-SM-4V6G4	Normal(n=712)	3.46989	NA	NA
GTEX-Y5V5-0326-SM-5RQJG	Normal(n=712)	3.75382	NA	NA
GTEX-Y5V6-0526-SM-4VBRV	Normal(n=712)	3.68257	NA	NA
GTEX-Y8E4-0126-SM-4VBQ2	Normal(n=712)	3.58976	NA	NA
GTEX-Y9LG-0426-SM-4VBRT	Normal(n=712)	3.66448	NA	NA
GTEX-YB5E-0626-SM-4VDSE	Normal(n=712)	3.48156	NA	NA
GTEX-YB5K-0526-SM-5LUAS	Normal(n=712)	3.849	NA	NA
GTEX-YEC3-0826-SM-4WWFP	Normal(n=712)	2.96033	NA	NA
GTEX-YEC4-0626-SM-5CVLU	Normal(n=712)	3.41549	NA	NA
GTEX-YF7O-0726-SM-4W213	Normal(n=712)	3.852	NA	NA
GTEX-YFC4-2626-SM-5P9FQ	Normal(n=712)	4.42089	NA	NA
GTEX-YFCO-0326-SM-4W1ZP	Normal(n=712)	3.32121	NA	NA
GTEX-YJ89-0726-SM-5P9F7	Normal(n=712)	4.17871	NA	NA
GTEX-Z93S-0526-SM-EVYB4	Normal(n=712)	3.75275	NA	NA
GTEX-Z9EW-0226-SM-5CVM7	Normal(n=712)	3.70598	NA	NA
GTEX-ZA64-0426-SM-5HL96	Normal(n=712)	3.58616	NA	NA
GTEX-ZAB5-0726-SM-5P9JG	Normal(n=712)	3.63459	NA	NA
GTEX-ZAJG-0726-SM-5HL9A	Normal(n=712)	4.25248	NA	NA
GTEX-ZAK1-0726-SM-5HL8Q	Normal(n=712)	4.01257	NA	NA
GTEX-ZC5H-0626-SM-5LU9K	Normal(n=712)	3.86493	NA	NA
GTEX-ZDTS-0926-SM-5YY9D	Normal(n=712)	3.9486	NA	NA
GTEX-ZDXO-1726-SM-5HL6L	Normal(n=712)	3.92315	NA	NA
GTEX-ZDYS-0626-SM-5J2N5	Normal(n=712)	3.52607	NA	NA
GTEX-ZE7O-1126-SM-57WC8	Normal(n=712)	4.49442	NA	NA
GTEX-ZF28-0826-SM-4WKGJ	Normal(n=712)	4.0798	NA	NA
GTEX-ZF29-0726-SM-DO92H	Normal(n=712)	3.59574	NA	NA
GTEX-ZF3C-0826-SM-DO11E	Normal(n=712)	3.91839	NA	NA
GTEX-ZGAY-1026-SM-4WWBR	Normal(n=712)	3.42506	NA	NA
GTEX-ZLFU-0626-SM-4WWBO	Normal(n=712)	3.70044	NA	NA
GTEX-ZLV1-0126-SM-4WWBZ	Normal(n=712)	3.39506	NA	NA
GTEX-ZLWG-0526-SM-4WWFB	Normal(n=712)	3.51096	NA	NA
GTEX-ZPCL-0126-SM-4WWC8	Normal(n=712)	3.4448	NA	NA
GTEX-ZPIC-0226-SM-DO91T	Normal(n=712)	3.56803	NA	NA
GTEX-ZPU1-0426-SM-4WWCA	Normal(n=712)	3.54844	NA	NA
GTEX-ZQG8-0926-SM-57WFF	Normal(n=712)	3.42008	NA	NA
GTEX-ZQUD-0126-SM-7EPIS	Normal(n=712)	3.75809	NA	NA
GTEX-ZT9W-0226-SM-7SB6H	Normal(n=712)	3.19125	NA	NA
GTEX-ZT9X-0226-SM-51MT2	Normal(n=712)	3.58496	NA	NA
GTEX-ZTPG-0826-SM-5DUVC	Normal(n=712)	3.93829	NA	NA
GTEX-ZTSS-0226-SM-59877	Normal(n=712)	3.64155	NA	NA
GTEX-ZTX8-0626-SM-59HKC	Normal(n=712)	3.76553	NA	NA
GTEX-ZUA1-0926-SM-4YCDX	Normal(n=712)	4.10852	NA	NA
GTEX-ZV6S-0226-SM-59HJT	Normal(n=712)	3.60526	NA	NA
GTEX-ZV7C-0126-SM-57WDE	Normal(n=712)	3.52231	NA	NA
GTEX-ZVP2-0426-SM-57WC2	Normal(n=712)	3.51223	NA	NA
GTEX-ZVT3-0726-SM-5GICN	Normal(n=712)	4.1127	NA	NA
GTEX-ZVZP-1026-SM-5GICI	Normal(n=712)	3.23772	NA	NA
GTEX-ZVZQ-0626-SM-59HJU	Normal(n=712)	4.12681	NA	NA
GTEX-ZXG5-0926-SM-5NQ8H	Normal(n=712)	4.27128	NA	NA
GTEX-ZY6K-0226-SM-5SIAY	Normal(n=712)	3.57289	NA	NA
GTEX-ZYFC-0926-SM-5GZWW	Normal(n=712)	4.2211	NA	NA
GTEX-ZYFD-0826-SM-5NQ9A	Normal(n=712)	4.337	NA	NA
GTEX-ZYFG-0626-SM-5GZYA	Normal(n=712)	3.34738	NA	NA
GTEX-ZYT6-0426-SM-5GID3	Normal(n=712)	3.86493	NA	NA
GTEX-ZYVF-1126-SM-5E458	Normal(n=712)	4.23189	NA	NA
GTEX-ZYW4-1126-SM-5SI99	Normal(n=712)	4.09424	NA	NA
GTEX-ZYY3-1926-SM-5GZXS	Normal(n=712)	3.69488	NA	NA
GTEX-ZZ64-0126-SM-5GZXA	Normal(n=712)	3.51349	NA	NA
GTEX-ZZPU-1326-SM-5GZWS	Normal(n=712)	3.5373	NA	NA

## Sheet: ZCCHC8
rownames(datas)	Type	values	times	status
TCGA-IM-A420-01	G1(n=288)	3.37963	NA	NA
TCGA-EM-A3FO-01	G1(n=288)	4.12683	NA	NA
TCGA-EL-A3H7-01	G1(n=288)	3.17546	NA	NA
TCGA-BJ-A0ZC-01	G1(n=288)	3.87929	NA	NA
TCGA-EM-A4FO-01	G1(n=288)	3.29986	NA	NA
TCGA-DJ-A2PO-01	G1(n=288)	4.06345	NA	NA
TCGA-EL-A3ZT-01	G1(n=288)	4.03604	NA	NA
TCGA-DJ-A13O-01	G1(n=288)	3.29572	NA	NA
TCGA-EM-A1CW-01	G1(n=288)	3.31994	NA	NA
TCGA-E3-A3E2-01	G1(n=288)	4.03385	NA	NA
TCGA-E8-A416-01	G1(n=288)	4.12834	NA	NA
TCGA-ET-A2N3-01	G1(n=288)	3.88218	NA	NA
TCGA-DJ-A4V0-01	G1(n=288)	3.64998	NA	NA
TCGA-EL-A3T6-01	G1(n=288)	3.06654	NA	NA
TCGA-ET-A3BO-01	G1(n=288)	4.04601	NA	NA
TCGA-CE-A481-01	G1(n=288)	4.0438	NA	NA
TCGA-E8-A419-01	G1(n=288)	3.42787	NA	NA
TCGA-E8-A438-01	G1(n=288)	3.39019	NA	NA
TCGA-E3-A3E0-01	G1(n=288)	4.26221	NA	NA
TCGA-ET-A3DS-01	G1(n=288)	3.95915	NA	NA
TCGA-DJ-A4UL-01	G1(n=288)	3.72547	NA	NA
TCGA-EM-A2CK-01	G1(n=288)	3.8237	NA	NA
TCGA-J8-A3O1-01	G1(n=288)	4.16221	NA	NA
TCGA-FE-A237-01	G1(n=288)	3.89836	NA	NA
TCGA-EM-A3O8-01	G1(n=288)	3.98828	NA	NA
TCGA-H2-A2K9-01	G1(n=288)	4.37016	NA	NA
TCGA-DJ-A1QM-01	G1(n=288)	3.5299	NA	NA
TCGA-H2-A3RH-01	G1(n=288)	4.27093	NA	NA
TCGA-IM-A41Z-01	G1(n=288)	3.72751	NA	NA
TCGA-IM-A3EB-01	G1(n=288)	3.68669	NA	NA
TCGA-EL-A3ZN-01	G1(n=288)	4.0439	NA	NA
TCGA-EL-A3ZS-01	G1(n=288)	3.89342	NA	NA
TCGA-EL-A3GR-01	G1(n=288)	3.68001	NA	NA
TCGA-ET-A39R-01	G1(n=288)	3.79058	NA	NA
TCGA-ET-A25O-01	G1(n=288)	4.40343	NA	NA
TCGA-BJ-A2N8-01	G1(n=288)	3.6729	NA	NA
TCGA-DJ-A13W-01	G1(n=288)	1.57652	NA	NA
TCGA-EL-A3N2-01	G1(n=288)	3.92627	NA	NA
TCGA-EM-A4FF-01	G1(n=288)	3.6235	NA	NA
TCGA-KS-A4I3-01	G1(n=288)	4.00447	NA	NA
TCGA-EM-A1CV-01	G1(n=288)	4.49877	NA	NA
TCGA-BJ-A3PR-01	G1(n=288)	3.24416	NA	NA
TCGA-BJ-A45J-01	G1(n=288)	3.54622	NA	NA
TCGA-EM-A3SY-01	G1(n=288)	2.38253	NA	NA
TCGA-FK-A3S3-01	G1(n=288)	3.74587	NA	NA
TCGA-FY-A3NP-01	G1(n=288)	3.70473	NA	NA
TCGA-FY-A3BL-01	G1(n=288)	3.78556	NA	NA
TCGA-MK-A4N6-01	G1(n=288)	3.23688	NA	NA
TCGA-E8-A437-01	G1(n=288)	3.62876	NA	NA
TCGA-EM-A3FL-01	G1(n=288)	3.26461	NA	NA
TCGA-J8-A3YH-01	G1(n=288)	4.37889	NA	NA
TCGA-E8-A433-01	G1(n=288)	3.00852	NA	NA
TCGA-E8-A2EA-01	G1(n=288)	3.02724	NA	NA
TCGA-ET-A3BU-01	G1(n=288)	4.01749	NA	NA
TCGA-EL-A4K0-01	G1(n=288)	4.1451	NA	NA
TCGA-DJ-A2PR-01	G1(n=288)	4.35164	NA	NA
TCGA-DJ-A3VJ-01	G1(n=288)	3.80997	NA	NA
TCGA-ET-A3DO-01	G1(n=288)	3.34859	NA	NA
TCGA-DJ-A3UV-01	G1(n=288)	3.88098	NA	NA
TCGA-J8-A3O2-06	G1(n=288)	4.33087	NA	NA
TCGA-IM-A4EB-01	G1(n=288)	3.19609	NA	NA
TCGA-FE-A234-01	G1(n=288)	3.75909	NA	NA
TCGA-EM-A2CQ-01	G1(n=288)	3.67051	NA	NA
TCGA-FY-A40K-01	G1(n=288)	4.25424	NA	NA
TCGA-ET-A40P-01	G1(n=288)	3.64514	NA	NA
TCGA-EL-A4KH-01	G1(n=288)	2.92134	NA	NA
TCGA-CE-A27D-01	G1(n=288)	3.79641	NA	NA
TCGA-KS-A4I7-01	G1(n=288)	4.0018	NA	NA
TCGA-EM-A3SZ-01	G1(n=288)	3.44392	NA	NA
TCGA-DJ-A4V4-01	G1(n=288)	3.47058	NA	NA
TCGA-EL-A4KG-01	G1(n=288)	3.56973	NA	NA
TCGA-FE-A3PD-01	G1(n=288)	4.076	NA	NA
TCGA-ET-A40R-01	G1(n=288)	3.67865	NA	NA
TCGA-EM-A4FK-01	G1(n=288)	4.39602	NA	NA
TCGA-BJ-A2N9-01	G1(n=288)	3.10212	NA	NA
TCGA-EM-A22Q-01	G1(n=288)	1.65251	NA	NA
TCGA-FE-A23A-01	G1(n=288)	2.9938	NA	NA
TCGA-J8-A3O0-01	G1(n=288)	3.82686	NA	NA
TCGA-IM-A3ED-01	G1(n=288)	3.83185	NA	NA
TCGA-BJ-A18Y-01	G1(n=288)	4.0776	NA	NA
TCGA-EL-A3GZ-01	G1(n=288)	4.45526	NA	NA
TCGA-BJ-A0ZJ-01	G1(n=288)	3.87561	NA	NA
TCGA-FE-A232-01	G1(n=288)	3.64659	NA	NA
TCGA-DJ-A3UP-01	G1(n=288)	4.28346	NA	NA
TCGA-DJ-A1QN-01	G1(n=288)	4.29156	NA	NA
TCGA-EM-A3AJ-01	G1(n=288)	3.5539	NA	NA
TCGA-BJ-A45K-01	G1(n=288)	4.06492	NA	NA
TCGA-DJ-A3V2-01	G1(n=288)	3.93316	NA	NA
TCGA-J8-A3O2-01	G1(n=288)	4.2687	NA	NA
TCGA-ET-A3BN-01	G1(n=288)	3.82012	NA	NA
TCGA-FY-A3R9-01	G1(n=288)	2.97986	NA	NA
TCGA-KS-A41J-01	G1(n=288)	3.35965	NA	NA
TCGA-EL-A4K2-01	G1(n=288)	3.96495	NA	NA
TCGA-FY-A3WA-01	G1(n=288)	5.28728	NA	NA
TCGA-DJ-A13S-01	G1(n=288)	3.32746	NA	NA
TCGA-EM-A2P1-06	G1(n=288)	3.54512	NA	NA
TCGA-DJ-A3US-01	G1(n=288)	4.11611	NA	NA
TCGA-ET-A39N-01	G1(n=288)	3.49534	NA	NA
TCGA-EM-A4FV-01	G1(n=288)	4.23654	NA	NA
TCGA-ET-A40T-01	G1(n=288)	4.19855	NA	NA
TCGA-ET-A25J-01	G1(n=288)	3.87632	NA	NA
TCGA-BJ-A28R-01	G1(n=288)	3.98344	NA	NA
TCGA-BJ-A3F0-01	G1(n=288)	3.24131	NA	NA
TCGA-E3-A3E1-01	G1(n=288)	3.89063	NA	NA
TCGA-DJ-A3UM-01	G1(n=288)	3.87642	NA	NA
TCGA-BJ-A291-01	G1(n=288)	2.73847	NA	NA
TCGA-E8-A417-01	G1(n=288)	3.86047	NA	NA
TCGA-FE-A235-01	G1(n=288)	3.59448	NA	NA
TCGA-CE-A483-01	G1(n=288)	4.19179	NA	NA
TCGA-KS-A41F-01	G1(n=288)	2.21409	NA	NA
TCGA-ET-A39S-01	G1(n=288)	4.02621	NA	NA
TCGA-DJ-A3VL-01	G1(n=288)	3.51013	NA	NA
TCGA-ET-A25K-01	G1(n=288)	4.11147	NA	NA
TCGA-ET-A3BS-01	G1(n=288)	3.59223	NA	NA
TCGA-H2-A421-01	G1(n=288)	3.57	NA	NA
TCGA-KS-A41I-01	G1(n=288)	2.23438	NA	NA
TCGA-EL-A3GO-01	G1(n=288)	3.86496	NA	NA
TCGA-EM-A2CL-01	G1(n=288)	4.03695	NA	NA
TCGA-MK-A4N7-01	G1(n=288)	4.09541	NA	NA
TCGA-CE-A13K-01	G1(n=288)	3.83595	NA	NA
TCGA-DJ-A1QQ-01	G1(n=288)	4.06302	NA	NA
TCGA-EL-A3H3-01	G1(n=288)	3.44014	NA	NA
TCGA-DJ-A4UP-01	G1(n=288)	3.87898	NA	NA
TCGA-DE-A7U5-01	G1(n=288)	3.24679	NA	NA
TCGA-DJ-A3VA-01	G1(n=288)	4.04118	NA	NA
TCGA-DJ-A4UT-01	G1(n=288)	3.75715	NA	NA
TCGA-ET-A25I-01	G1(n=288)	2.90589	NA	NA
TCGA-BJ-A45E-01	G1(n=288)	2.20602	NA	NA
TCGA-EM-A2CT-01	G1(n=288)	4.34284	NA	NA
TCGA-FY-A3ON-01	G1(n=288)	4.25348	NA	NA
TCGA-BJ-A28W-01	G1(n=288)	2.54411	NA	NA
TCGA-EL-A3CX-01	G1(n=288)	3.1424	NA	NA
TCGA-DJ-A4V2-01	G1(n=288)	3.63354	NA	NA
TCGA-ET-A39M-01	G1(n=288)	2.81568	NA	NA
TCGA-FK-A3SB-01	G1(n=288)	3.99042	NA	NA
TCGA-H2-A422-01	G1(n=288)	3.72931	NA	NA
TCGA-DJ-A3UT-01	G1(n=288)	3.68355	NA	NA
TCGA-FK-A3SD-01	G1(n=288)	3.24329	NA	NA
TCGA-FY-A4B0-01	G1(n=288)	4.00523	NA	NA
TCGA-ET-A2MZ-01	G1(n=288)	4.04548	NA	NA
TCGA-E8-A2JQ-01	G1(n=288)	2.8182	NA	NA
TCGA-ET-A39L-01	G1(n=288)	4.1885	NA	NA
TCGA-EM-A3AP-01	G1(n=288)	3.80058	NA	NA
TCGA-MK-A4N9-01	G1(n=288)	4.11708	NA	NA
TCGA-DJ-A2PN-01	G1(n=288)	3.80525	NA	NA
TCGA-E3-A3DY-01	G1(n=288)	4.11697	NA	NA
TCGA-DJ-A3VD-01	G1(n=288)	3.55593	NA	NA
TCGA-ET-A3DP-01	G1(n=288)	3.84675	NA	NA
TCGA-EL-A4JW-01	G1(n=288)	3.48391	NA	NA
TCGA-E8-A415-01	G1(n=288)	3.96259	NA	NA
TCGA-ET-A3DU-01	G1(n=288)	2.82038	NA	NA
TCGA-FK-A3SE-01	G1(n=288)	3.71536	NA	NA
TCGA-DE-A69J-01	G1(n=288)	4.13439	NA	NA
TCGA-EL-A4K4-01	G1(n=288)	3.00938	NA	NA
TCGA-ET-A39I-01	G1(n=288)	3.91293	NA	NA
TCGA-EL-A3CZ-01	G1(n=288)	4.2137	NA	NA
TCGA-DJ-A1QG-01	G1(n=288)	3.27624	NA	NA
TCGA-GE-A2C6-01	G1(n=288)	3.9644	NA	NA
TCGA-DJ-A3UN-01	G1(n=288)	4.15649	NA	NA
TCGA-EL-A3ZP-01	G1(n=288)	3.9313	NA	NA
TCGA-J8-A3YE-01	G1(n=288)	4.06496	NA	NA
TCGA-DJ-A13T-01	G1(n=288)	4.27326	NA	NA
TCGA-EM-A3FQ-01	G1(n=288)	3.62786	NA	NA
TCGA-DJ-A3UY-01	G1(n=288)	3.83134	NA	NA
TCGA-FE-A230-01	G1(n=288)	3.17828	NA	NA
TCGA-EL-A3H1-01	G1(n=288)	3.86254	NA	NA
TCGA-DJ-A2PS-01	G1(n=288)	4.34467	NA	NA
TCGA-EM-A1CU-01	G1(n=288)	3.87708	NA	NA
TCGA-ET-A40Q-01	G1(n=288)	3.40646	NA	NA
TCGA-EL-A3ZH-01	G1(n=288)	3.90254	NA	NA
TCGA-ET-A3BQ-01	G1(n=288)	3.85277	NA	NA
TCGA-ET-A3BX-01	G1(n=288)	3.75195	NA	NA
TCGA-EL-A3ZL-01	G1(n=288)	3.84561	NA	NA
TCGA-EM-A22N-01	G1(n=288)	2.96196	NA	NA
TCGA-BJ-A2N7-01	G1(n=288)	3.90381	NA	NA
TCGA-DJ-A1QD-01	G1(n=288)	3.76954	NA	NA
TCGA-BJ-A45D-01	G1(n=288)	2.77457	NA	NA
TCGA-ET-A2MX-01	G1(n=288)	3.11076	NA	NA
TCGA-EM-A3AN-01	G1(n=288)	4.23265	NA	NA
TCGA-CE-A482-01	G1(n=288)	4.12847	NA	NA
TCGA-FY-A3RA-01	G1(n=288)	3.91465	NA	NA
TCGA-DE-A0Y2-01	G1(n=288)	3.67957	NA	NA
TCGA-BJ-A0ZG-01	G1(n=288)	3.89394	NA	NA
TCGA-DJ-A2PQ-01	G1(n=288)	4.158	NA	NA
TCGA-DJ-A3VG-01	G1(n=288)	3.82775	NA	NA
TCGA-E8-A434-01	G1(n=288)	4.18541	NA	NA
TCGA-DJ-A2Q6-01	G1(n=288)	4.22915	NA	NA
TCGA-DJ-A2Q1-01	G1(n=288)	2.84617	NA	NA
TCGA-EM-A2P3-01	G1(n=288)	4.10942	NA	NA
TCGA-BJ-A28T-01	G1(n=288)	3.46279	NA	NA
TCGA-ET-A39O-01	G1(n=288)	3.27938	NA	NA
TCGA-EL-A3T1-01	G1(n=288)	3.45286	NA	NA
TCGA-E8-A44M-01	G1(n=288)	3.68196	NA	NA
TCGA-EM-A1CS-01	G1(n=288)	4.27888	NA	NA
TCGA-CE-A485-01	G1(n=288)	4.17566	NA	NA
TCGA-BJ-A0Z3-01	G1(n=288)	3.86858	NA	NA
TCGA-EL-A3ZK-01	G1(n=288)	3.28105	NA	NA
TCGA-EM-A3FJ-01	G1(n=288)	4.30653	NA	NA
TCGA-E8-A44K-01	G1(n=288)	3.29347	NA	NA
TCGA-EL-A3H8-01	G1(n=288)	4.22637	NA	NA
TCGA-BJ-A191-01	G1(n=288)	4.3132	NA	NA
TCGA-FY-A40M-01	G1(n=288)	4.322	NA	NA
TCGA-EM-A2OZ-01	G1(n=288)	4.14758	NA	NA
TCGA-BJ-A28X-01	G1(n=288)	3.73607	NA	NA
TCGA-EL-A3GW-01	G1(n=288)	4.16733	NA	NA
TCGA-EM-A3FQ-06	G1(n=288)	3.68761	NA	NA
TCGA-IM-A41Y-01	G1(n=288)	3.2626	NA	NA
TCGA-DJ-A13L-01	G1(n=288)	3.39348	NA	NA
TCGA-DO-A1JZ-01	G1(n=288)	4.23407	NA	NA
TCGA-ET-A2MY-01	G1(n=288)	3.57675	NA	NA
TCGA-EL-A3T8-01	G1(n=288)	4.06671	NA	NA
TCGA-ET-A25P-01	G1(n=288)	3.90029	NA	NA
TCGA-EM-A3FK-01	G1(n=288)	4.31314	NA	NA
TCGA-H2-A3RI-01	G1(n=288)	4.03871	NA	NA
TCGA-DJ-A3V8-01	G1(n=288)	3.771	NA	NA
TCGA-EM-A3SU-06	G1(n=288)	3.45087	NA	NA
TCGA-EL-A3CV-01	G1(n=288)	3.79892	NA	NA
TCGA-BJ-A45F-01	G1(n=288)	2.88729	NA	NA
TCGA-KS-A41L-01	G1(n=288)	3.33851	NA	NA
TCGA-DO-A1K0-01	G1(n=288)	3.90768	NA	NA
TCGA-EM-A3SX-01	G1(n=288)	4.47123	NA	NA
TCGA-ET-A39J-01	G1(n=288)	4.3652	NA	NA
TCGA-L6-A4EP-01	G1(n=288)	3.67869	NA	NA
TCGA-DJ-A13V-01	G1(n=288)	4.30755	NA	NA
TCGA-DE-A2OL-01	G1(n=288)	4.12547	NA	NA
TCGA-FY-A3I4-01	G1(n=288)	3.6004	NA	NA
TCGA-EM-A4FQ-01	G1(n=288)	3.11919	NA	NA
TCGA-EM-A2P1-01	G1(n=288)	3.22369	NA	NA
TCGA-EL-A3GQ-01	G1(n=288)	4.23737	NA	NA
TCGA-EL-A4JV-01	G1(n=288)	3.95753	NA	NA
TCGA-EL-A3D1-01	G1(n=288)	2.8407	NA	NA
TCGA-KS-A4ID-01	G1(n=288)	3.04904	NA	NA
TCGA-FY-A40N-01	G1(n=288)	4.42771	NA	NA
TCGA-FE-A233-01	G1(n=288)	3.924	NA	NA
TCGA-DJ-A4UW-01	G1(n=288)	3.7658	NA	NA
TCGA-EM-A3AL-01	G1(n=288)	4.00398	NA	NA
TCGA-J8-A3YH-06	G1(n=288)	4.24457	NA	NA
TCGA-FE-A236-01	G1(n=288)	4.09688	NA	NA
TCGA-EM-A3AK-01	G1(n=288)	3.81823	NA	NA
TCGA-KS-A4I9-01	G1(n=288)	3.58056	NA	NA
TCGA-EM-A2CJ-01	G1(n=288)	3.77707	NA	NA
TCGA-CE-A484-01	G1(n=288)	4.09859	NA	NA
TCGA-ET-A25M-01	G1(n=288)	3.72839	NA	NA
TCGA-DJ-A13M-01	G1(n=288)	3.21566	NA	NA
TCGA-ET-A3BP-01	G1(n=288)	3.94807	NA	NA
TCGA-EL-A3TA-01	G1(n=288)	3.69587	NA	NA
TCGA-IM-A3U3-01	G1(n=288)	3.81645	NA	NA
TCGA-EM-A2CP-01	G1(n=288)	3.35236	NA	NA
TCGA-EM-A22L-01	G1(n=288)	3.93152	NA	NA
TCGA-DE-A4M9-01	G1(n=288)	4.01047	NA	NA
TCGA-DJ-A3UK-01	G1(n=288)	4.39536	NA	NA
TCGA-DE-A4MC-01	G1(n=288)	3.23723	NA	NA
TCGA-ET-A3BW-01	G1(n=288)	4.57079	NA	NA
TCGA-E8-A413-01	G1(n=288)	3.85901	NA	NA
TCGA-FK-A3SG-01	G1(n=288)	3.65833	NA	NA
TCGA-EM-A22M-01	G1(n=288)	2.89457	NA	NA
TCGA-EL-A3CY-01	G1(n=288)	3.57843	NA	NA
TCGA-FE-A3PB-01	G1(n=288)	3.31793	NA	NA
TCGA-EM-A3AR-01	G1(n=288)	4.01233	NA	NA
TCGA-EM-A3OB-01	G1(n=288)	4.16895	NA	NA
TCGA-DJ-A3UX-01	G1(n=288)	4.155	NA	NA
TCGA-KS-A4I1-01	G1(n=288)	3.95371	NA	NA
TCGA-EL-A3ZG-01	G1(n=288)	4.0004	NA	NA
TCGA-ET-A3DT-01	G1(n=288)	3.42281	NA	NA
TCGA-EL-A3GX-01	G1(n=288)	3.69107	NA	NA
TCGA-EM-A2OW-01	G1(n=288)	2.77142	NA	NA
TCGA-DJ-A3VE-01	G1(n=288)	4.10617	NA	NA
TCGA-BJ-A2P4-01	G1(n=288)	3.37979	NA	NA
TCGA-EM-A4FU-01	G1(n=288)	3.2033	NA	NA
TCGA-FE-A3PC-01	G1(n=288)	3.4535	NA	NA
TCGA-EM-A3SU-01	G1(n=288)	2.89954	NA	NA
TCGA-EM-A4G1-01	G1(n=288)	3.74242	NA	NA
TCGA-KS-A4IB-01	G1(n=288)	3.88501	NA	NA
TCGA-ET-A3DR-01	G1(n=288)	4.06539	NA	NA
TCGA-ET-A25N-01	G1(n=288)	3.78177	NA	NA
TCGA-CE-A3MD-01	G1(n=288)	4.03966	NA	NA
TCGA-EM-A3FN-01	G1(n=288)	3.21749	NA	NA
TCGA-DJ-A2PX-01	G1(n=288)	3.79418	NA	NA
TCGA-EM-A2P0-01	G1(n=288)	4.26874	NA	NA
TCGA-EL-A3GS-01	G1(n=288)	3.64924	NA	NA
TCGA-EM-A4FR-01	G1(n=288)	3.56809	NA	NA
TCGA-EL-A4KD-01	G1(n=288)	3.72948	NA	NA
TCGA-FE-A238-01	G1(n=288)	3.77756	NA	NA
TCGA-DJ-A3UW-01	G1(n=288)	2.87904	NA	NA
TCGA-EM-A3AQ-01	G1(n=288)	3.93387	NA	NA
TCGA-EL-A4JX-01	G1(n=288)	2.77754	NA	NA
TCGA-EL-A3D5-01	G1(n=288)	4.00262	NA	NA
TCGA-ET-A3DQ-01	G1(n=288)	3.57805	NA	NA
TCGA-FE-A3PA-01	G2(n=52)	3.75441	NA	NA
TCGA-FY-A76V-01	G2(n=52)	4.16318	NA	NA
TCGA-EM-A2CR-01	G2(n=52)	2.17744	NA	NA
TCGA-BJ-A190-01	G2(n=52)	4.07033	NA	NA
TCGA-ET-A3DV-01	G2(n=52)	3.73296	NA	NA
TCGA-DJ-A4UR-01	G2(n=52)	3.49635	NA	NA
TCGA-EM-A3AI-01	G2(n=52)	3.8205	NA	NA
TCGA-EM-A1YD-01	G2(n=52)	3.73735	NA	NA
TCGA-DJ-A2PV-01	G2(n=52)	4.21911	NA	NA
TCGA-EM-A3O6-01	G2(n=52)	3.41256	NA	NA
TCGA-EM-A3FP-01	G2(n=52)	3.03349	NA	NA
TCGA-DJ-A13P-01	G2(n=52)	4.27578	NA	NA
TCGA-EL-A4K9-01	G2(n=52)	3.97824	NA	NA
TCGA-EL-A3CL-01	G2(n=52)	3.92719	NA	NA
TCGA-EM-A3OA-01	G2(n=52)	3.9477	NA	NA
TCGA-EL-A3MW-01	G2(n=52)	4.22666	NA	NA
TCGA-DJ-A1QF-01	G2(n=52)	3.84408	NA	NA
TCGA-DJ-A2PP-01	G2(n=52)	4.04012	NA	NA
TCGA-DJ-A2PU-01	G2(n=52)	4.06233	NA	NA
TCGA-ET-A40S-01	G2(n=52)	3.76351	NA	NA
TCGA-BJ-A0ZF-01	G2(n=52)	3.49447	NA	NA
TCGA-EM-A1YA-01	G2(n=52)	3.28352	NA	NA
TCGA-DJ-A3V3-01	G2(n=52)	3.85303	NA	NA
TCGA-BJ-A0ZA-01	G2(n=52)	3.77303	NA	NA
TCGA-BJ-A0Z0-01	G2(n=52)	4.19547	NA	NA
TCGA-EL-A3H2-01	G2(n=52)	4.13736	NA	NA
TCGA-DJ-A2QC-01	G2(n=52)	3.31549	NA	NA
TCGA-EL-A3CN-01	G2(n=52)	3.1496	NA	NA
TCGA-EL-A3GY-01	G2(n=52)	3.87556	NA	NA
TCGA-E8-A432-01	G2(n=52)	4.17314	NA	NA
TCGA-EL-A3T7-01	G2(n=52)	3.90957	NA	NA
TCGA-DJ-A3VM-01	G2(n=52)	3.44324	NA	NA
TCGA-BJ-A28S-01	G2(n=52)	4.40229	NA	NA
TCGA-BJ-A4O9-01	G2(n=52)	4.50996	NA	NA
TCGA-BJ-A0YZ-01	G2(n=52)	3.18745	NA	NA
TCGA-EL-A3ZR-01	G2(n=52)	4.10733	NA	NA
TCGA-EM-A1YB-01	G2(n=52)	2.67082	NA	NA
TCGA-FY-A3W9-01	G2(n=52)	4.474	NA	NA
TCGA-DJ-A1QL-01	G2(n=52)	3.81052	NA	NA
TCGA-DJ-A1QI-01	G2(n=52)	4.05575	NA	NA
TCGA-EL-A3N3-01	G2(n=52)	3.36095	NA	NA
TCGA-EM-A2OV-01	G2(n=52)	3.14877	NA	NA
TCGA-EL-A3T3-01	G2(n=52)	3.32819	NA	NA
TCGA-CE-A3ME-01	G2(n=52)	4.30176	NA	NA
TCGA-E3-A3E3-01	G2(n=52)	3.7827	NA	NA
TCGA-EM-A22J-01	G2(n=52)	3.47919	NA	NA
TCGA-EL-A3ZQ-01	G2(n=52)	1.88456	NA	NA
TCGA-DJ-A2Q0-01	G2(n=52)	2.78733	NA	NA
TCGA-EM-A2CO-01	G2(n=52)	2.64503	NA	NA
TCGA-EM-A2OY-01	G2(n=52)	3.07861	NA	NA
TCGA-EM-A1YE-01	G2(n=52)	3.72303	NA	NA
TCGA-ET-A4KQ-01	G2(n=52)	4.12023	NA	NA
TCGA-ET-A2N0-01	G3(n=113)	2.21325	NA	NA
TCGA-EM-A1YC-01	G3(n=113)	3.25659	NA	NA
TCGA-MK-A84Z-01	G3(n=113)	3.68899	NA	NA
TCGA-FY-A3NN-01	G3(n=113)	3.48267	NA	NA
TCGA-DJ-A1QO-01	G3(n=113)	3.28836	NA	NA
TCGA-EL-A3GV-01	G3(n=113)	3.91366	NA	NA
TCGA-BJ-A2NA-01	G3(n=113)	3.71297	NA	NA
TCGA-EL-A3CM-01	G3(n=113)	3.25079	NA	NA
TCGA-EM-A3O3-01	G3(n=113)	2.96612	NA	NA
TCGA-FY-A3TY-01	G3(n=113)	3.92592	NA	NA
TCGA-EL-A3D6-01	G3(n=113)	2.84101	NA	NA
TCGA-J8-A3YF-01	G3(n=113)	3.32181	NA	NA
TCGA-ET-A25G-01	G3(n=113)	3.2585	NA	NA
TCGA-EM-A3FR-01	G3(n=113)	4.20715	NA	NA
TCGA-BJ-A3PT-01	G3(n=113)	3.4226	NA	NA
TCGA-DJ-A2Q7-01	G3(n=113)	3.98827	NA	NA
TCGA-FK-A3SH-01	G3(n=113)	3.9589	NA	NA
TCGA-DJ-A13X-01	G3(n=113)	4.16639	NA	NA
TCGA-EL-A3CU-01	G3(n=113)	3.71714	NA	NA
TCGA-J8-A3YD-01	G3(n=113)	3.95528	NA	NA
TCGA-FY-A3YR-01	G3(n=113)	3.3871	NA	NA
TCGA-BJ-A28V-01	G3(n=113)	4.09764	NA	NA
TCGA-E8-A242-01	G3(n=113)	2.89457	NA	NA
TCGA-EL-A3CR-01	G3(n=113)	3.0835	NA	NA
TCGA-FE-A239-01	G3(n=113)	3.9763	NA	NA
TCGA-DE-A69K-01	G3(n=113)	4.05019	NA	NA
TCGA-EL-A3D0-01	G3(n=113)	3.74897	NA	NA
TCGA-EM-A2CM-01	G3(n=113)	3.18753	NA	NA
TCGA-EL-A4K1-01	G3(n=113)	2.69022	NA	NA
TCGA-DJ-A2QA-01	G3(n=113)	2.24199	NA	NA
TCGA-ET-A3BV-01	G3(n=113)	3.55386	NA	NA
TCGA-EL-A4KI-01	G3(n=113)	2.92037	NA	NA
TCGA-DJ-A3VB-01	G3(n=113)	3.22205	NA	NA
TCGA-J8-A3YG-01	G3(n=113)	3.58417	NA	NA
TCGA-EL-A3T2-01	G3(n=113)	4.28491	NA	NA
TCGA-ET-A39K-01	G3(n=113)	3.25148	NA	NA
TCGA-H2-A26U-01	G3(n=113)	3.53143	NA	NA
TCGA-BJ-A45H-01	G3(n=113)	3.94417	NA	NA
TCGA-EM-A2P2-01	G3(n=113)	4.13285	NA	NA
TCGA-EL-A4K7-01	G3(n=113)	3.22885	NA	NA
TCGA-DJ-A3V4-01	G3(n=113)	3.83046	NA	NA
TCGA-FY-A3R8-01	G3(n=113)	3.9154	NA	NA
TCGA-DJ-A3UU-01	G3(n=113)	4.05564	NA	NA
TCGA-DJ-A3UQ-01	G3(n=113)	3.71162	NA	NA
TCGA-ET-A2N4-01	G3(n=113)	4.13811	NA	NA
TCGA-J8-A42S-01	G3(n=113)	3.91757	NA	NA
TCGA-J8-A4HW-01	G3(n=113)	4.14035	NA	NA
TCGA-FK-A4UB-01	G3(n=113)	3.6973	NA	NA
TCGA-DJ-A2PW-01	G3(n=113)	3.87113	NA	NA
TCGA-EL-A3MZ-01	G3(n=113)	3.17461	NA	NA
TCGA-BJ-A45C-01	G3(n=113)	4.09188	NA	NA
TCGA-EL-A3TB-01	G3(n=113)	3.806	NA	NA
TCGA-BJ-A45G-01	G3(n=113)	3.87737	NA	NA
TCGA-DE-A0XZ-01	G3(n=113)	4.3416	NA	NA
TCGA-BJ-A45I-01	G3(n=113)	3.51593	NA	NA
TCGA-DJ-A2PZ-01	G3(n=113)	3.68967	NA	NA
TCGA-DJ-A3V7-01	G3(n=113)	3.66287	NA	NA
TCGA-DJ-A2Q4-01	G3(n=113)	3.87515	NA	NA
TCGA-DJ-A3UR-01	G3(n=113)	4.27119	NA	NA
TCGA-DJ-A3V5-01	G3(n=113)	3.77748	NA	NA
TCGA-DJ-A1QH-01	G3(n=113)	3.79335	NA	NA
TCGA-BJ-A3PU-01	G3(n=113)	3.12165	NA	NA
TCGA-BJ-A192-01	G3(n=113)	3.46586	NA	NA
TCGA-E8-A414-01	G3(n=113)	4.09711	NA	NA
TCGA-BJ-A0Z5-01	G3(n=113)	3.61844	NA	NA
TCGA-ET-A3DW-01	G3(n=113)	3.8296	NA	NA
TCGA-EM-A22I-01	G3(n=113)	3.24428	NA	NA
TCGA-DJ-A2Q3-01	G3(n=113)	3.72273	NA	NA
TCGA-L6-A4EU-01	G3(n=113)	3.02722	NA	NA
TCGA-DJ-A3UZ-01	G3(n=113)	4.13553	NA	NA
TCGA-DJ-A2PY-01	G3(n=113)	4.03455	NA	NA
TCGA-EL-A3GP-01	G3(n=113)	3.31976	NA	NA
TCGA-EM-A3O7-01	G3(n=113)	4.23334	NA	NA
TCGA-EM-A2CU-01	G3(n=113)	3.67119	NA	NA
TCGA-ET-A4KN-01	G3(n=113)	0.712816	NA	NA
TCGA-FY-A3R7-01	G3(n=113)	4.06329	NA	NA
TCGA-DJ-A2Q2-01	G3(n=113)	3.766	NA	NA
TCGA-DJ-A1QE-01	G3(n=113)	3.6346	NA	NA
TCGA-DJ-A13U-01	G3(n=113)	3.94892	NA	NA
TCGA-EL-A4JZ-01	G3(n=113)	3.77829	NA	NA
TCGA-J8-A4HW-06	G3(n=113)	3.94672	NA	NA
TCGA-BJ-A0ZE-01	G3(n=113)	2.57476	NA	NA
TCGA-EM-A4FH-01	G3(n=113)	4.25607	NA	NA
TCGA-EL-A3CW-01	G3(n=113)	3.77688	NA	NA
TCGA-EM-A3ST-01	G3(n=113)	4.13273	NA	NA
TCGA-BJ-A290-01	G3(n=113)	4.64703	NA	NA
TCGA-FY-A3I5-01	G3(n=113)	3.80531	NA	NA
TCGA-FY-A4B4-01	G3(n=113)	3.53259	NA	NA
TCGA-FY-A4B3-01	G3(n=113)	4.52192	NA	NA
TCGA-ET-A39P-01	G3(n=113)	3.65116	NA	NA
TCGA-DJ-A13R-01	G3(n=113)	2.10507	NA	NA
TCGA-EL-A3CO-01	G3(n=113)	3.57993	NA	NA
TCGA-KS-A4IC-01	G3(n=113)	3.93323	NA	NA
TCGA-DJ-A2PT-01	G3(n=113)	2.89815	NA	NA
TCGA-ET-A25R-01	G3(n=113)	3.57396	NA	NA
TCGA-EL-A3GU-01	G3(n=113)	3.30401	NA	NA
TCGA-DJ-A2Q9-01	G3(n=113)	3.48771	NA	NA
TCGA-J8-A3NZ-01	G3(n=113)	3.9364	NA	NA
TCGA-E3-A3DZ-01	G3(n=113)	4.19733	NA	NA
TCGA-DJ-A3VI-01	G3(n=113)	3.42588	NA	NA
TCGA-DJ-A3VK-01	G3(n=113)	4.31495	NA	NA
TCGA-BJ-A0Z9-01	G3(n=113)	3.42479	NA	NA
TCGA-EL-A3ZO-01	G3(n=113)	3.06461	NA	NA
TCGA-DE-A4M8-01	G3(n=113)	3.21701	NA	NA
TCGA-BJ-A28Z-01	G3(n=113)	3.09446	NA	NA
TCGA-EL-A3T0-01	G3(n=113)	3.77675	NA	NA
TCGA-DJ-A3V6-01	G3(n=113)	3.60892	NA	NA
TCGA-BJ-A4O8-01	G3(n=113)	3.77375	NA	NA
TCGA-DE-A4MA-01	G3(n=113)	2.17082	NA	NA
TCGA-ET-A2N5-01	G3(n=113)	3.52537	NA	NA
TCGA-ET-A39T-01	G3(n=113)	4.11978	NA	NA
TCGA-L6-A4EQ-01	G3(n=113)	3.80871	NA	NA
TCGA-FY-A3NM-01	G3(n=113)	4.10178	NA	NA
TCGA-KS-A4I5-01	G4(n=57)	3.76401	NA	NA
TCGA-EM-A4FM-01	G4(n=57)	3.19898	NA	NA
TCGA-DJ-A3V9-01	G4(n=57)	4.40541	NA	NA
TCGA-E8-A436-01	G4(n=57)	3.78998	NA	NA
TCGA-EM-A2OX-01	G4(n=57)	4.53886	NA	NA
TCGA-DE-A0Y3-01	G4(n=57)	3.77086	NA	NA
TCGA-EL-A3CT-01	G4(n=57)	3.22726	NA	NA
TCGA-EM-A22O-01	G4(n=57)	3.76275	NA	NA
TCGA-DE-A3KN-01	G4(n=57)	4.18393	NA	NA
TCGA-FE-A22Z-01	G4(n=57)	3.15656	NA	NA
TCGA-E8-A418-01	G4(n=57)	3.94971	NA	NA
TCGA-EL-A3D4-01	G4(n=57)	3.69075	NA	NA
TCGA-EM-A2CN-01	G4(n=57)	4.22499	NA	NA
TCGA-EM-A3AO-01	G4(n=57)	3.58205	NA	NA
TCGA-DJ-A4V5-01	G4(n=57)	3.92753	NA	NA
TCGA-EL-A3H5-01	G4(n=57)	2.11477	NA	NA
TCGA-EL-A3T9-01	G4(n=57)	3.10916	NA	NA
TCGA-EM-A3FM-01	G4(n=57)	2.82656	NA	NA
TCGA-QD-A8IV-01	G4(n=57)	3.87441	NA	NA
TCGA-EM-A2CS-01	G4(n=57)	4.5454	NA	NA
TCGA-EL-A3ZM-01	G4(n=57)	2.69793	NA	NA
TCGA-DJ-A3V0-01	G4(n=57)	3.38495	NA	NA
TCGA-ET-A3BT-01	G4(n=57)	3.76599	NA	NA
TCGA-J8-A4HY-01	G4(n=57)	3.47803	NA	NA
TCGA-EL-A4K6-01	G4(n=57)	4.11625	NA	NA
TCGA-EL-A3MY-01	G4(n=57)	3.11821	NA	NA
TCGA-E8-A3X7-01	G4(n=57)	3.25005	NA	NA
TCGA-BJ-A0ZB-01	G4(n=57)	3.68924	NA	NA
TCGA-EM-A4FN-01	G4(n=57)	3.1323	NA	NA
TCGA-FY-A40L-01	G4(n=57)	3.47029	NA	NA
TCGA-DJ-A3VF-01	G4(n=57)	3.32376	NA	NA
TCGA-BJ-A3EZ-01	G4(n=57)	3.54667	NA	NA
TCGA-DJ-A3UO-01	G4(n=57)	4.27643	NA	NA
TCGA-DE-A4MB-01	G4(n=57)	3.26674	NA	NA
TCGA-DE-A4MD-06	G4(n=57)	2.9381	NA	NA
TCGA-IM-A3U2-01	G4(n=57)	3.01732	NA	NA
TCGA-EM-A2CS-06	G4(n=57)	3.91692	NA	NA
TCGA-DJ-A2Q5-01	G4(n=57)	3.90021	NA	NA
TCGA-BJ-A0ZH-01	G4(n=57)	3.63479	NA	NA
TCGA-DJ-A2QB-01	G4(n=57)	3.15737	NA	NA
TCGA-DJ-A4UQ-01	G4(n=57)	4.28645	NA	NA
TCGA-BJ-A0Z2-01	G4(n=57)	4.24451	NA	NA
TCGA-ET-A25L-01	G4(n=57)	3.29361	NA	NA
TCGA-EL-A3MX-01	G4(n=57)	3.89675	NA	NA
TCGA-L6-A4ET-01	G4(n=57)	4.01445	NA	NA
TCGA-E3-A3E5-01	G4(n=57)	4.26523	NA	NA
TCGA-BJ-A18Z-01	G4(n=57)	3.59775	NA	NA
TCGA-4C-A93U-01	G4(n=57)	3.32718	NA	NA
TCGA-EL-A3CS-01	G4(n=57)	3.97739	NA	NA
TCGA-FY-A3R6-01	G4(n=57)	3.50406	NA	NA
TCGA-DO-A2HM-01	G4(n=57)	3.75072	NA	NA
TCGA-EM-A22P-01	G4(n=57)	4.1651	NA	NA
TCGA-DE-A4MD-01	G4(n=57)	3.69095	NA	NA
TCGA-EM-A22K-01	G4(n=57)	4.04243	NA	NA
TCGA-EM-A1CT-01	G4(n=57)	3.64645	NA	NA
TCGA-FE-A231-01	G4(n=57)	3.88059	NA	NA
TCGA-EL-A3H4-01	G4(n=57)	3.50961	NA	NA
TCGA-ET-A3DW-11	Normal(n=712)	3.91537	NA	NA
TCGA-EL-A3TA-11	Normal(n=712)	4.16565	NA	NA
TCGA-EL-A3T7-11	Normal(n=712)	4.01728	NA	NA
TCGA-BJ-A3PR-11	Normal(n=712)	2.52286	NA	NA
TCGA-DO-A1JZ-11	Normal(n=712)	4.02722	NA	NA
TCGA-BJ-A28W-11	Normal(n=712)	2.00637	NA	NA
TCGA-BJ-A28R-11	Normal(n=712)	3.72333	NA	NA
TCGA-KS-A41I-11	Normal(n=712)	3.7028	NA	NA
TCGA-EL-A3ZG-11	Normal(n=712)	3.55277	NA	NA
TCGA-BJ-A2N7-11	Normal(n=712)	4.10996	NA	NA
TCGA-EL-A3ZQ-11	Normal(n=712)	4.06318	NA	NA
TCGA-EM-A1CV-11	Normal(n=712)	4.14758	NA	NA
TCGA-BJ-A290-11	Normal(n=712)	4.07364	NA	NA
TCGA-EL-A3ZO-11	Normal(n=712)	3.75013	NA	NA
TCGA-EL-A3T8-11	Normal(n=712)	3.92592	NA	NA
TCGA-H2-A3RI-11	Normal(n=712)	4.18217	NA	NA
TCGA-EL-A3N2-11	Normal(n=712)	4.20988	NA	NA
TCGA-BJ-A28X-11	Normal(n=712)	3.98477	NA	NA
TCGA-EM-A1YC-11	Normal(n=712)	3.63284	NA	NA
TCGA-EL-A3MX-11	Normal(n=712)	3.96584	NA	NA
TCGA-ET-A2N5-11	Normal(n=712)	3.93777	NA	NA
TCGA-EL-A3T2-11	Normal(n=712)	4.24435	NA	NA
TCGA-GE-A2C6-11	Normal(n=712)	3.82689	NA	NA
TCGA-ET-A3DP-11	Normal(n=712)	4.1356	NA	NA
TCGA-BJ-A3PU-11	Normal(n=712)	4.25078	NA	NA
TCGA-EL-A3ZH-11	Normal(n=712)	4.13253	NA	NA
TCGA-EL-A3ZP-11	Normal(n=712)	4.02438	NA	NA
TCGA-EL-A3H2-11	Normal(n=712)	4.13868	NA	NA
TCGA-EM-A1CU-11	Normal(n=712)	4.47195	NA	NA
TCGA-EL-A3T3-11	Normal(n=712)	3.86514	NA	NA
TCGA-H2-A2K9-11	Normal(n=712)	4.01183	NA	NA
TCGA-EM-A3ST-11	Normal(n=712)	3.57652	NA	NA
TCGA-EL-A3H7-11	Normal(n=712)	4.01311	NA	NA
TCGA-EL-A3T6-11	Normal(n=712)	3.74802	NA	NA
TCGA-EL-A3MY-11	Normal(n=712)	3.90918	NA	NA
TCGA-EL-A3TB-11	Normal(n=712)	4.10377	NA	NA
TCGA-FY-A3TY-11	Normal(n=712)	4.2768	NA	NA
TCGA-EL-A3T0-11	Normal(n=712)	3.76328	NA	NA
TCGA-BJ-A2N8-11	Normal(n=712)	4.2142	NA	NA
TCGA-BJ-A2NA-11	Normal(n=712)	3.63967	NA	NA
TCGA-EM-A1CS-11	Normal(n=712)	3.81725	NA	NA
TCGA-EL-A3ZR-11	Normal(n=712)	4.0645	NA	NA
TCGA-EL-A3ZS-11	Normal(n=712)	2.54127	NA	NA
TCGA-EM-A1CW-11	Normal(n=712)	4.48017	NA	NA
TCGA-ET-A2MX-11	Normal(n=712)	4.13585	NA	NA
TCGA-EL-A3ZT-11	Normal(n=712)	4.0455	NA	NA
TCGA-KS-A41L-11	Normal(n=712)	4.06307	NA	NA
TCGA-KS-A41J-11	Normal(n=712)	4.14836	NA	NA
TCGA-EM-A1CT-11	Normal(n=712)	3.88491	NA	NA
TCGA-E8-A2JQ-11	Normal(n=712)	3.85077	NA	NA
TCGA-EL-A3N3-11	Normal(n=712)	4.00973	NA	NA
TCGA-EL-A3H1-11	Normal(n=712)	3.68948	NA	NA
TCGA-EL-A3T1-11	Normal(n=712)	3.71194	NA	NA
TCGA-EL-A3MW-11	Normal(n=712)	4.16173	NA	NA
TCGA-EL-A3ZM-11	Normal(n=712)	3.78	NA	NA
TCGA-BJ-A2N9-11	Normal(n=712)	3.42935	NA	NA
TCGA-EL-A3ZL-11	Normal(n=712)	4.32703	NA	NA
TCGA-EL-A3GZ-11	Normal(n=712)	4.20516	NA	NA
TCGA-EL-A3ZK-11	Normal(n=712)	3.84707	NA	NA
GTEX-111CU-0226-SM-5GZXC	Normal(n=712)	3.9607	NA	NA
GTEX-111FC-1026-SM-5GZX1	Normal(n=712)	4.26303	NA	NA
GTEX-111VG-0526-SM-5N9BW	Normal(n=712)	3.82883	NA	NA
GTEX-111YS-0726-SM-5GZY8	Normal(n=712)	4.05658	NA	NA
GTEX-1122O-0226-SM-5N9DA	Normal(n=712)	3.88655	NA	NA
GTEX-1128S-0126-SM-5H12S	Normal(n=712)	4.27724	NA	NA
GTEX-113JC-0126-SM-5EGJW	Normal(n=712)	4.23496	NA	NA
GTEX-117XS-0526-SM-5987Q	Normal(n=712)	4.3512	NA	NA
GTEX-117YW-0126-SM-5EGGN	Normal(n=712)	4.14323	NA	NA
GTEX-117YX-1226-SM-5H11S	Normal(n=712)	4.34412	NA	NA
GTEX-1192W-0126-SM-5EGGS	Normal(n=712)	4.19377	NA	NA
GTEX-1192X-1126-SM-5EGGU	Normal(n=712)	4.19456	NA	NA
GTEX-11DXX-0226-SM-5P9HL	Normal(n=712)	3.86691	NA	NA
GTEX-11DXY-0426-SM-5H12R	Normal(n=712)	4.01346	NA	NA
GTEX-11DXZ-0926-SM-5N9CG	Normal(n=712)	4.23649	NA	NA
GTEX-11DYG-0826-SM-5N9GH	Normal(n=712)	4.45352	NA	NA
GTEX-11DZ1-2726-SM-5A5KH	Normal(n=712)	4.30743	NA	NA
GTEX-11EI6-0726-SM-59866	Normal(n=712)	4.09592	NA	NA
GTEX-11EM3-0126-SM-5985K	Normal(n=712)	3.75702	NA	NA
GTEX-11EMC-0226-SM-5EGLP	Normal(n=712)	4.11603	NA	NA
GTEX-11EQ8-0826-SM-5N9FG	Normal(n=712)	4.9528	NA	NA
GTEX-11EQ9-0626-SM-5A5K1	Normal(n=712)	3.96347	NA	NA
GTEX-11GS4-0826-SM-5986J	Normal(n=712)	4.01346	NA	NA
GTEX-11GSO-0626-SM-5A5LW	Normal(n=712)	4.41007	NA	NA
GTEX-11GSP-0126-SM-5A5KU	Normal(n=712)	3.84398	NA	NA
GTEX-11I78-0526-SM-5986A	Normal(n=712)	3.97636	NA	NA
GTEX-11LCK-0526-SM-5A5M9	Normal(n=712)	4.30597	NA	NA
GTEX-11NSD-0126-SM-5987F	Normal(n=712)	4.39438	NA	NA
GTEX-11NUK-1026-SM-5HL5J	Normal(n=712)	4.1334	NA	NA
GTEX-11NV4-0626-SM-5N9BR	Normal(n=712)	4.12516	NA	NA
GTEX-11O72-2326-SM-5BC7H	Normal(n=712)	4.01257	NA	NA
GTEX-11OF3-0626-SM-5BC4Y	Normal(n=712)	4.54535	NA	NA
GTEX-11P7K-0226-SM-5986Z	Normal(n=712)	4.04614	NA	NA
GTEX-11P81-0126-SM-5HL5Y	Normal(n=712)	4.50271	NA	NA
GTEX-11P82-0226-SM-5HL4O	Normal(n=712)	3.70155	NA	NA
GTEX-11TT1-1126-SM-5P9GV	Normal(n=712)	3.82782	NA	NA
GTEX-11TTK-0826-SM-5N9EG	Normal(n=712)	3.94579	NA	NA
GTEX-11TUW-0226-SM-5LU8X	Normal(n=712)	4.57168	NA	NA
GTEX-11UD2-0626-SM-5GU6L	Normal(n=712)	4.59036	NA	NA
GTEX-11VI4-0226-SM-5GU6C	Normal(n=712)	3.94767	NA	NA
GTEX-11XUK-0226-SM-5EQLW	Normal(n=712)	3.99277	NA	NA
GTEX-11ZTS-1126-SM-5LU9X	Normal(n=712)	3.97361	NA	NA
GTEX-11ZTT-1026-SM-5EQKF	Normal(n=712)	3.95884	NA	NA
GTEX-11ZVC-0126-SM-5986G	Normal(n=712)	4.04527	NA	NA
GTEX-1211K-0726-SM-5FQUW	Normal(n=712)	4.24793	NA	NA
GTEX-1212Z-0426-SM-5FQT6	Normal(n=712)	4.24717	NA	NA
GTEX-12584-0826-SM-5FQSK	Normal(n=712)	4.66959	NA	NA
GTEX-12696-0326-SM-5EGL4	Normal(n=712)	4.1811	NA	NA
GTEX-1269C-0226-SM-5EGKS	Normal(n=712)	4.00809	NA	NA
GTEX-12BJ1-0426-SM-5FQSO	Normal(n=712)	4.08066	NA	NA
GTEX-12WSC-0826-SM-5EQ5Q	Normal(n=712)	4.06437	NA	NA
GTEX-12WSD-0926-SM-5GCNL	Normal(n=712)	4.14241	NA	NA
GTEX-12WSE-1226-SM-73KUF	Normal(n=712)	4.12846	NA	NA
GTEX-12WSG-0226-SM-5EGIF	Normal(n=712)	3.8748	NA	NA
GTEX-12WSH-0226-SM-5GCOG	Normal(n=712)	4.45418	NA	NA
GTEX-12WSJ-0326-SM-5GCMT	Normal(n=712)	3.84599	NA	NA
GTEX-12WSK-0926-SM-5CVNQ	Normal(n=712)	4.24945	NA	NA
GTEX-12WSL-0626-SM-5GCOY	Normal(n=712)	4.58556	NA	NA
GTEX-12WSN-0726-SM-5GCMS	Normal(n=712)	4.26379	NA	NA
GTEX-12ZZX-1226-SM-5EGHS	Normal(n=712)	3.91361	NA	NA
GTEX-12ZZY-0826-SM-5EQMT	Normal(n=712)	3.98185	NA	NA
GTEX-12ZZZ-1226-SM-59HK1	Normal(n=712)	4.10685	NA	NA
GTEX-13111-0226-SM-5EQ55	Normal(n=712)	3.80219	NA	NA
GTEX-13112-0326-SM-5P9IW	Normal(n=712)	4.22574	NA	NA
GTEX-13113-0126-SM-5LZVX	Normal(n=712)	4.15785	NA	NA
GTEX-1313W-0726-SM-5EGK1	Normal(n=712)	4.47249	NA	NA
GTEX-131XE-0126-SM-5LZVC	Normal(n=712)	4.0009	NA	NA
GTEX-131XF-1826-SM-5EGKG	Normal(n=712)	4.21023	NA	NA
GTEX-131XG-0226-SM-5IFG1	Normal(n=712)	4.16832	NA	NA
GTEX-131XH-0526-SM-5DUX7	Normal(n=712)	3.76871	NA	NA
GTEX-131YS-0726-SM-5P9G9	Normal(n=712)	4.23726	NA	NA
GTEX-132AR-1126-SM-5P9GA	Normal(n=712)	4.21179	NA	NA
GTEX-132NY-1026-SM-5P9IY	Normal(n=712)	4.03474	NA	NA
GTEX-132QS-0326-SM-5IJFN	Normal(n=712)	3.8339	NA	NA
GTEX-133LE-0326-SM-5P9G4	Normal(n=712)	3.80941	NA	NA
GTEX-1399R-0126-SM-5IFEV	Normal(n=712)	4.01167	NA	NA
GTEX-1399T-0126-SM-5KM15	Normal(n=712)	3.94298	NA	NA
GTEX-1399U-0326-SM-5P9G5	Normal(n=712)	4.2817	NA	NA
GTEX-139T6-0326-SM-5J2LY	Normal(n=712)	4.0045	NA	NA
GTEX-139TS-0126-SM-5K7XJ	Normal(n=712)	4.03914	NA	NA
GTEX-139UW-0126-SM-5KM1B	Normal(n=712)	3.9364	NA	NA
GTEX-139YR-1226-SM-5IFEU	Normal(n=712)	4.04439	NA	NA
GTEX-13CF3-0926-SM-5LZZC	Normal(n=712)	4.12184	NA	NA
GTEX-13D11-0226-SM-5LZXL	Normal(n=712)	3.77716	NA	NA
GTEX-13FH7-0126-SM-5KLZ1	Normal(n=712)	4.01614	NA	NA
GTEX-13FHO-0926-SM-5N9EW	Normal(n=712)	4.41007	NA	NA
GTEX-13FHP-0926-SM-5L3EC	Normal(n=712)	4.33842	NA	NA
GTEX-13FLV-0226-SM-5J2OF	Normal(n=712)	4.11103	NA	NA
GTEX-13FLW-0326-SM-5J2M4	Normal(n=712)	4.35826	NA	NA
GTEX-13FTW-0626-SM-5IFEX	Normal(n=712)	3.854	NA	NA
GTEX-13FTY-0726-SM-5J2OH	Normal(n=712)	4.24413	NA	NA
GTEX-13FXS-0726-SM-5LZXJ	Normal(n=712)	3.88947	NA	NA
GTEX-13G51-1226-SM-5K7Z3	Normal(n=712)	4.37921	NA	NA
GTEX-13IVO-0926-SM-5KLZP	Normal(n=712)	4.90737	NA	NA
GTEX-13JVG-0926-SM-5IJE1	Normal(n=712)	4.50526	NA	NA
GTEX-13N11-1026-SM-5K7XQ	Normal(n=712)	4.37643	NA	NA
GTEX-13N1W-0826-SM-5MR5J	Normal(n=712)	4.42962	NA	NA
GTEX-13N2G-0726-SM-5MR38	Normal(n=712)	4.51665	NA	NA
GTEX-13NYB-0726-SM-5MR4J	Normal(n=712)	3.8339	NA	NA
GTEX-13NYC-2426-SM-5MR3K	Normal(n=712)	4.23189	NA	NA
GTEX-13NZ8-0226-SM-5J2OK	Normal(n=712)	4.6865	NA	NA
GTEX-13NZ9-1126-SM-5MR37	Normal(n=712)	4.43429	NA	NA
GTEX-13NZA-1026-SM-5MR48	Normal(n=712)	3.86493	NA	NA
GTEX-13O1R-0826-SM-5J2MB	Normal(n=712)	4.08831	NA	NA
GTEX-13O21-2226-SM-5MR3L	Normal(n=712)	3.9644	NA	NA
GTEX-13O3O-0926-SM-5KM1F	Normal(n=712)	4.41684	NA	NA
GTEX-13O3P-0726-SM-5J2OM	Normal(n=712)	4.58496	NA	NA
GTEX-13O3Q-0626-SM-5IJG1	Normal(n=712)	4.32769	NA	NA
GTEX-13O61-0226-SM-5KM52	Normal(n=712)	3.8125	NA	NA
GTEX-13OVG-0226-SM-5LU93	Normal(n=712)	4.50271	NA	NA
GTEX-13OVI-0826-SM-5KLZ8	Normal(n=712)	4.08236	NA	NA
GTEX-13OVJ-0626-SM-5J2O2	Normal(n=712)	3.85997	NA	NA
GTEX-13OVK-0226-SM-6M472	Normal(n=712)	4.4363	NA	NA
GTEX-13OW5-0626-SM-5J2N2	Normal(n=712)	4.25248	NA	NA
GTEX-13OW6-0726-SM-5L3FX	Normal(n=712)	4.26604	NA	NA
GTEX-13OW7-0826-SM-5L3EL	Normal(n=712)	4.32481	NA	NA
GTEX-13OW8-0126-SM-5IJE5	Normal(n=712)	4.08746	NA	NA
GTEX-13PDP-1026-SM-5L3FA	Normal(n=712)	4.83996	NA	NA
GTEX-13PL6-1026-SM-5L3E5	Normal(n=712)	4.44361	NA	NA
GTEX-13PVQ-0726-SM-5L3GI	Normal(n=712)	4.36317	NA	NA
GTEX-13PVR-0626-SM-5S2RC	Normal(n=712)	3.70377	NA	NA
GTEX-13QBU-0626-SM-5J2OG	Normal(n=712)	3.81352	NA	NA
GTEX-13QJ3-0926-SM-73KX5	Normal(n=712)	4.44824	NA	NA
GTEX-13QJC-0826-SM-5RQKC	Normal(n=712)	4.40667	NA	NA
GTEX-13RTJ-0326-SM-5YYAE	Normal(n=712)	4.1914	NA	NA
GTEX-13RTK-0326-SM-5RQHS	Normal(n=712)	4.2891	NA	NA
GTEX-13S86-1126-SM-5RQJX	Normal(n=712)	4.08916	NA	NA
GTEX-13U4I-0526-SM-5LU59	Normal(n=712)	4.21801	NA	NA
GTEX-13VXT-0626-SM-5SIA1	Normal(n=712)	4.58075	NA	NA
GTEX-13VXU-0826-SM-5KLZ2	Normal(n=712)	3.80839	NA	NA
GTEX-13W46-0926-SM-5LU3T	Normal(n=712)	4.83491	NA	NA
GTEX-13X6H-0526-SM-5LU4Q	Normal(n=712)	4.2032	NA	NA
GTEX-13X6J-0826-SM-5LU32	Normal(n=712)	4.14975	NA	NA
GTEX-13YAN-0926-SM-5O9C3	Normal(n=712)	4.78031	NA	NA
GTEX-144GL-1226-SM-5O9A4	Normal(n=712)	4.54411	NA	NA
GTEX-144GM-0226-SM-5Q5CB	Normal(n=712)	3.97728	NA	NA
GTEX-144GO-0126-SM-5LUAO	Normal(n=712)	4.14568	NA	NA
GTEX-145LT-0226-SM-5S2QK	Normal(n=712)	4.12846	NA	NA
GTEX-145LU-0426-SM-5O9AH	Normal(n=712)	4	NA	NA
GTEX-145ME-0126-SM-5S2QM	Normal(n=712)	4.1375	NA	NA
GTEX-145MG-0826-SM-5Q5C2	Normal(n=712)	4.17632	NA	NA
GTEX-145MH-0426-SM-5LU8T	Normal(n=712)	4.21101	NA	NA
GTEX-145MI-1126-SM-5O9AK	Normal(n=712)	4.8475	NA	NA
GTEX-146FQ-0726-SM-5LUA7	Normal(n=712)	4.28244	NA	NA
GTEX-146FR-0326-SM-5SI8U	Normal(n=712)	4.07639	NA	NA
GTEX-14753-0926-SM-5Q5BI	Normal(n=712)	4.78031	NA	NA
GTEX-1477Z-0226-SM-5TDCI	Normal(n=712)	4.60703	NA	NA
GTEX-147F4-0826-SM-5QGRB	Normal(n=712)	4.06953	NA	NA
GTEX-147GR-0726-SM-5S2PL	Normal(n=712)	4.1819	NA	NA
GTEX-148VI-0526-SM-5TDDG	Normal(n=712)	4.29939	NA	NA
GTEX-148VJ-0726-SM-5LU8J	Normal(n=712)	4.85	NA	NA
GTEX-1497J-0126-SM-5Q5BK	Normal(n=712)	3.95884	NA	NA
GTEX-14A5H-0726-SM-5Q5DW	Normal(n=712)	4.36247	NA	NA
GTEX-14A6H-2426-SM-5Q5BO	Normal(n=712)	4.57894	NA	NA
GTEX-14ABY-0926-SM-5Q5DY	Normal(n=712)	4.06264	NA	NA
GTEX-14AS3-0226-SM-5Q5B6	Normal(n=712)	4.42492	NA	NA
GTEX-14ASI-0726-SM-5Q5DC	Normal(n=712)	3.96717	NA	NA
GTEX-14B4R-0126-SM-5TDE4	Normal(n=712)	4.13668	NA	NA
GTEX-14BIN-0126-SM-5TDCG	Normal(n=712)	4.28318	NA	NA
GTEX-14BMU-0226-SM-5S2QA	Normal(n=712)	3.74739	NA	NA
GTEX-14BMV-0726-SM-73KVE	Normal(n=712)	3.98823	NA	NA
GTEX-14C38-0826-SM-5S2U8	Normal(n=712)	4.23726	NA	NA
GTEX-14C39-0226-SM-5TDDW	Normal(n=712)	4.05311	NA	NA
GTEX-14C5O-0826-SM-5TDEG	Normal(n=712)	4.36317	NA	NA
GTEX-14DAQ-0826-SM-73KWT	Normal(n=712)	4.29646	NA	NA
GTEX-14E6C-2626-SM-5RQJP	Normal(n=712)	4.65421	NA	NA
GTEX-14E6E-0326-SM-73KY6	Normal(n=712)	3.926	NA	NA
GTEX-14E7W-0926-SM-5YYA4	Normal(n=712)	3.98185	NA	NA
GTEX-14ICK-1626-SM-6ETZX	Normal(n=712)	3.59574	NA	NA
GTEX-14ICL-0426-SM-5RQJ3	Normal(n=712)	4.35473	NA	NA
GTEX-14JG6-1326-SM-9OSXU	Normal(n=712)	4.01525	NA	NA
GTEX-14JIY-1226-SM-6871R	Normal(n=712)	3.76765	NA	NA
GTEX-14PHW-2926-SM-6AJBA	Normal(n=712)	4.32265	NA	NA
GTEX-14PII-0826-SM-6871S	Normal(n=712)	4.35473	NA	NA
GTEX-14PJ3-0126-SM-69LQP	Normal(n=712)	3.82985	NA	NA
GTEX-14PJ4-0326-SM-664OT	Normal(n=712)	4.15381	NA	NA
GTEX-14PJ6-0326-SM-6871H	Normal(n=712)	3.05015	NA	NA
GTEX-14PJM-1326-SM-664NX	Normal(n=712)	3.56316	NA	NA
GTEX-14PJO-0626-SM-6LLHH	Normal(n=712)	4.21645	NA	NA
GTEX-14PK6-0426-SM-6EU1J	Normal(n=712)	3.69377	NA	NA
GTEX-14PKU-0326-SM-6AJA7	Normal(n=712)	4.29719	NA	NA
GTEX-14PKV-0626-SM-6AJA2	Normal(n=712)	4.09761	NA	NA
GTEX-14PN3-0826-SM-69LOS	Normal(n=712)	4.03122	NA	NA
GTEX-14PN4-1526-SM-6871V	Normal(n=712)	4.32553	NA	NA
GTEX-14PQA-1226-SM-6M47A	Normal(n=712)	4.16269	NA	NA
GTEX-14XAO-0426-SM-6AJB6	Normal(n=712)	3.64731	NA	NA
GTEX-15CHC-0126-SM-5YYBA	Normal(n=712)	4.06264	NA	NA
GTEX-15CHQ-0826-SM-69LOT	Normal(n=712)	4.23802	NA	NA
GTEX-15CHR-1726-SM-7DUGW	Normal(n=712)	4.26454	NA	NA
GTEX-15D1Q-0626-SM-6AJAZ	Normal(n=712)	4.16752	NA	NA
GTEX-15DDE-0626-SM-69LOK	Normal(n=712)	4.95791	NA	NA
GTEX-15DZA-0226-SM-7KFS6	Normal(n=712)	3.95606	NA	NA
GTEX-15EO6-0126-SM-6LPKJ	Normal(n=712)	4.25399	NA	NA
GTEX-15ER7-0726-SM-7KUMF	Normal(n=712)	4.25776	NA	NA
GTEX-15ETS-0526-SM-6PAN3	Normal(n=712)	4.4489	NA	NA
GTEX-15EU6-1426-SM-6M48E	Normal(n=712)	3.93074	NA	NA
GTEX-15FZZ-0226-SM-6LLI4	Normal(n=712)	3.48414	NA	NA
GTEX-15G19-0626-SM-6M474	Normal(n=712)	3.99095	NA	NA
GTEX-15G1A-0326-SM-6M467	Normal(n=712)	3.90689	NA	NA
GTEX-15RIE-0426-SM-7KUMH	Normal(n=712)	4.20163	NA	NA
GTEX-15RIF-0326-SM-7KUFR	Normal(n=712)	2.76977	NA	NA
GTEX-15RJ7-0326-SM-6M47H	Normal(n=712)	3.80116	NA	NA
GTEX-15RJE-1326-SM-6LPI6	Normal(n=712)	4.1375	NA	NA
GTEX-15SB6-1526-SM-7KUMQ	Normal(n=712)	3.98914	NA	NA
GTEX-15SHU-0726-SM-7KUFI	Normal(n=712)	4.27202	NA	NA
GTEX-15SHV-0426-SM-6M476	Normal(n=712)	4.16189	NA	NA
GTEX-15UF6-1126-SM-6LPJ3	Normal(n=712)	4.27501	NA	NA
GTEX-169BO-0326-SM-7EPIM	Normal(n=712)	4.05572	NA	NA
GTEX-16AAH-0326-SM-7DHML	Normal(n=712)	3.68032	NA	NA
GTEX-16BQI-0726-SM-6LPJZ	Normal(n=712)	4.12681	NA	NA
GTEX-16GPK-0926-SM-6LPJ9	Normal(n=712)	3.86196	NA	NA
GTEX-16MT8-0626-SM-6M47Q	Normal(n=712)	4.35896	NA	NA
GTEX-16MTA-0726-SM-7KUL4	Normal(n=712)	4.15056	NA	NA
GTEX-16NGA-0326-SM-718AJ	Normal(n=712)	4.3147	NA	NA
GTEX-16NPX-1426-SM-6LPK3	Normal(n=712)	4.01792	NA	NA
GTEX-16XZY-0726-SM-79OMU	Normal(n=712)	3.80529	NA	NA
GTEX-16XZZ-0826-SM-7IGM3	Normal(n=712)	4.61765	NA	NA
GTEX-16YQH-0326-SM-6LPJV	Normal(n=712)	3.95699	NA	NA
GTEX-16Z82-0426-SM-7EPGX	Normal(n=712)	4.32553	NA	NA
GTEX-178AV-0726-SM-6LPJI	Normal(n=712)	3.94392	NA	NA
GTEX-17EVP-0126-SM-7EPHW	Normal(n=712)	4.37851	NA	NA
GTEX-17EVQ-0526-SM-7KFSK	Normal(n=712)	4.58376	NA	NA
GTEX-17F96-0526-SM-79OLE	Normal(n=712)	4.49313	NA	NA
GTEX-17F97-0626-SM-7IGOH	Normal(n=712)	4.53667	NA	NA
GTEX-17F9E-0626-SM-79ON5	Normal(n=712)	4.20085	NA	NA
GTEX-17F9Y-0526-SM-7EWDC	Normal(n=712)	4.58376	NA	NA
GTEX-17GQL-0226-SM-7LTAK	Normal(n=712)	3.98003	NA	NA
GTEX-17HG3-0226-SM-7EWEA	Normal(n=712)	3.92979	NA	NA
GTEX-17HGU-0826-SM-7EWE5	Normal(n=712)	4.29572	NA	NA
GTEX-17HHE-0426-SM-79OK3	Normal(n=712)	4.39232	NA	NA
GTEX-17HHY-0826-SM-7EPID	Normal(n=712)	3.99548	NA	NA
GTEX-17HII-1926-SM-79OLB	Normal(n=712)	4.55582	NA	NA
GTEX-17JCI-0626-SM-7IGM7	Normal(n=712)	3.9542	NA	NA
GTEX-17KNJ-1026-SM-79ONK	Normal(n=712)	4.16269	NA	NA
GTEX-17MF6-0626-SM-7LT8D	Normal(n=712)	3.91743	NA	NA
GTEX-183FY-0626-SM-79OKR	Normal(n=712)	4.24108	NA	NA
GTEX-183WM-2626-SM-7KFRY	Normal(n=712)	4.08321	NA	NA
GTEX-18465-1426-SM-7KFTF	Normal(n=712)	4.34625	NA	NA
GTEX-18A66-0826-SM-72D5Z	Normal(n=712)	4.15218	NA	NA
GTEX-18A67-0826-SM-7KFTI	Normal(n=712)	3.85599	NA	NA
GTEX-18A6Q-0726-SM-7LT8Y	Normal(n=712)	3.6837	NA	NA
GTEX-18A7A-0826-SM-7KFTJ	Normal(n=712)	4.15137	NA	NA
GTEX-18D9A-0126-SM-7KFSI	Normal(n=712)	4.39917	NA	NA
GTEX-18D9B-0726-SM-72D6K	Normal(n=712)	3.66789	NA	NA
GTEX-18D9U-1026-SM-72D5R	Normal(n=712)	4.3147	NA	NA
GTEX-18QFQ-0726-SM-7LG6D	Normal(n=712)	4.1102	NA	NA
GTEX-1A3MV-0326-SM-73KW7	Normal(n=712)	4.10098	NA	NA
GTEX-1A8FM-0726-SM-7DUGK	Normal(n=712)	4.06178	NA	NA
GTEX-1A8G6-0626-SM-7IGNB	Normal(n=712)	4.11187	NA	NA
GTEX-1A8G7-1026-SM-73KVA	Normal(n=712)	4.47119	NA	NA
GTEX-1AMEY-0126-SM-73KTX	Normal(n=712)	3.76765	NA	NA
GTEX-1AMFI-0526-SM-7189M	Normal(n=712)	4.29131	NA	NA
GTEX-1AX8Z-0826-SM-7DUFZ	Normal(n=712)	4.04789	NA	NA
GTEX-1AX9I-0626-SM-72D54	Normal(n=712)	4.16108	NA	NA
GTEX-1AX9J-2126-SM-731DD	Normal(n=712)	3.97269	NA	NA
GTEX-1AX9K-0626-SM-73KVD	Normal(n=712)	4.0917	NA	NA
GTEX-1AYCT-0226-SM-73KVB	Normal(n=712)	4.26078	NA	NA
GTEX-1B8KE-0626-SM-7189H	Normal(n=712)	4.15218	NA	NA
GTEX-1B8KZ-0426-SM-731DP	Normal(n=712)	4.21801	NA	NA
GTEX-1B8L1-1626-SM-7IGMH	Normal(n=712)	4.07382	NA	NA
GTEX-1B8SF-0626-SM-73KVV	Normal(n=712)	3.99639	NA	NA
GTEX-1B8SG-1126-SM-7IGMT	Normal(n=712)	4.11603	NA	NA
GTEX-1B932-0926-SM-73KUP	Normal(n=712)	4.32048	NA	NA
GTEX-1B933-1026-SM-7P8RO	Normal(n=712)	4.05311	NA	NA
GTEX-1B97I-0326-SM-7DUGB	Normal(n=712)	3.92979	NA	NA
GTEX-1B97J-0626-SM-7P8RU	Normal(n=712)	4.1035	NA	NA
GTEX-1BAJH-0926-SM-79OO6	Normal(n=712)	3.91265	NA	NA
GTEX-1C2JI-0326-SM-7EWFD	Normal(n=712)	3.49697	NA	NA
GTEX-1C475-0226-SM-7MGXM	Normal(n=712)	3.36779	NA	NA
GTEX-1C4CL-0726-SM-7IGP9	Normal(n=712)	4.49378	NA	NA
GTEX-1C64N-1026-SM-79ONM	Normal(n=712)	4.10936	NA	NA
GTEX-1C6VQ-0526-SM-7MGWD	Normal(n=712)	3.60288	NA	NA
GTEX-1C6VR-0426-SM-7IGN6	Normal(n=712)	4.32337	NA	NA
GTEX-1C6VS-0826-SM-7EWEI	Normal(n=712)	4.64674	NA	NA
GTEX-1CAMQ-1126-SM-7EWFE	Normal(n=712)	4.337	NA	NA
GTEX-1CAMR-0226-SM-7DUGO	Normal(n=712)	3.90111	NA	NA
GTEX-1CAMS-0826-SM-7P8P1	Normal(n=712)	4.03914	NA	NA
GTEX-1CB4E-0326-SM-7MXT3	Normal(n=712)	3.79597	NA	NA
GTEX-1CB4F-0826-SM-793CV	Normal(n=712)	4.14486	NA	NA
GTEX-1CB4G-1526-SM-7P8QG	Normal(n=712)	3.81147	NA	NA
GTEX-1CB4H-0126-SM-7IGN2	Normal(n=712)	4.32048	NA	NA
GTEX-1CB4I-0726-SM-7DUGS	Normal(n=712)	4.25701	NA	NA
GTEX-1CB4J-1426-SM-7MKFR	Normal(n=712)	4.14078	NA	NA
GTEX-1E1VI-0726-SM-7P8QJ	Normal(n=712)	4.12846	NA	NA
GTEX-1EH9U-0926-SM-7EWF1	Normal(n=712)	4.25626	NA	NA
GTEX-1EKGG-0726-SM-7IGPX	Normal(n=712)	4.0027	NA	NA
GTEX-1EMGI-0826-SM-7EPHY	Normal(n=712)	3.96162	NA	NA
GTEX-1EN7A-1026-SM-7IGPZ	Normal(n=712)	4.41886	NA	NA
GTEX-1EU9M-0626-SM-7MXUT	Normal(n=712)	3.88264	NA	NA
GTEX-1EWIQ-0826-SM-7MXTH	Normal(n=712)	4.20867	NA	NA
GTEX-1EX96-0126-SM-9KNVH	Normal(n=712)	4.30086	NA	NA
GTEX-1F48J-0926-SM-7P8PZ	Normal(n=712)	4.1643	NA	NA
GTEX-1F52S-0526-SM-7P8TP	Normal(n=712)	4.69766	NA	NA
GTEX-1F5PL-0826-SM-7MXU7	Normal(n=712)	3.74846	NA	NA
GTEX-1F6IF-1126-SM-9KNV2	Normal(n=712)	4.34127	NA	NA
GTEX-1F75A-0326-SM-7MXTR	Normal(n=712)	4.22265	NA	NA
GTEX-1F75B-0826-SM-9QEIT	Normal(n=712)	3.98277	NA	NA
GTEX-1F75I-0926-SM-7MXUU	Normal(n=712)	4.1635	NA	NA
GTEX-1F88F-0726-SM-7P8R7	Normal(n=712)	3.82273	NA	NA
GTEX-1FIGZ-0226-SM-7P8QR	Normal(n=712)	3.9542	NA	NA
GTEX-1GF9U-0226-SM-7P8TY	Normal(n=712)	4.49185	NA	NA
GTEX-1GF9V-0926-SM-9KNW7	Normal(n=712)	4.39232	NA	NA
GTEX-1GF9W-0626-SM-7MXVJ	Normal(n=712)	4.28318	NA	NA
GTEX-1GF9X-0126-SM-A9G38	Normal(n=712)	4.42492	NA	NA
GTEX-1GL5R-0626-SM-7PBZY	Normal(n=712)	4.55029	NA	NA
GTEX-1GMR3-0726-SM-9WPOF	Normal(n=712)	4.35896	NA	NA
GTEX-1GMR8-0826-SM-9KNUR	Normal(n=712)	4.50653	NA	NA
GTEX-1GMRU-1126-SM-9KNV1	Normal(n=712)	4.24565	NA	NA
GTEX-1GN1U-0826-SM-9WPPX	Normal(n=712)	4.51538	NA	NA
GTEX-1GN1V-0626-SM-7P8QU	Normal(n=712)	4.27277	NA	NA
GTEX-1GN1W-0126-SM-7MXV7	Normal(n=712)	3.80529	NA	NA
GTEX-1GN2E-0826-SM-9WYT8	Normal(n=712)	4.32481	NA	NA
GTEX-1GN73-0826-SM-9OSW4	Normal(n=712)	4.1127	NA	NA
GTEX-1GPI7-0726-SM-9WG84	Normal(n=712)	4.13996	NA	NA
GTEX-1GTWX-0726-SM-9WPPA	Normal(n=712)	4.26679	NA	NA
GTEX-1GZ2Q-0826-SM-7P8TK	Normal(n=712)	4.48671	NA	NA
GTEX-1GZ4H-0226-SM-9JGGJ	Normal(n=712)	2.70022	NA	NA
GTEX-1GZ4I-0626-SM-9WPPN	Normal(n=712)	4.07895	NA	NA
GTEX-1GZHY-1426-SM-9WG5H	Normal(n=712)	4.15947	NA	NA
GTEX-1H11D-0626-SM-9WPQ1	Normal(n=712)	4.30961	NA	NA
GTEX-1H1CY-0726-SM-9OSXX	Normal(n=712)	4.17951	NA	NA
GTEX-1H1DE-0226-SM-ARZN8	Normal(n=712)	4.24945	NA	NA
GTEX-1H1DF-1026-SM-9QEJ1	Normal(n=712)	4.41481	NA	NA
GTEX-1H1DG-0726-SM-A96TN	Normal(n=712)	4.08406	NA	NA
GTEX-1H1E6-0326-SM-9OSWE	Normal(n=712)	4.01436	NA	NA
GTEX-1H1ZS-0726-SM-A9G3K	Normal(n=712)	4.53978	NA	NA
GTEX-1H2FU-0626-SM-9WPPS	Normal(n=712)	4.18982	NA	NA
GTEX-1H3VE-0826-SM-9KNVQ	Normal(n=712)	4.28021	NA	NA
GTEX-1HB9E-0826-SM-CNNQJ	Normal(n=712)	4.08151	NA	NA
GTEX-1HBPH-0926-SM-A9SME	Normal(n=712)	4.23726	NA	NA
GTEX-1HBPI-0826-SM-9WYTX	Normal(n=712)	3.92029	NA	NA
GTEX-1HBPM-0926-SM-ARL9C	Normal(n=712)	4.40939	NA	NA
GTEX-1HBPN-1226-SM-B2LW9	Normal(n=712)	3.80426	NA	NA
GTEX-1HC8U-1226-SM-9WYUW	Normal(n=712)	4.25475	NA	NA
GTEX-1HCU7-0826-SM-B2LX7	Normal(n=712)	4.57471	NA	NA
GTEX-1HCU9-0226-SM-9WPNT	Normal(n=712)	3.99729	NA	NA
GTEX-1HCUA-0126-SM-B2LWC	Normal(n=712)	4.27575	NA	NA
GTEX-1HCVE-0726-SM-A96SH	Normal(n=712)	4.31687	NA	NA
GTEX-1HFI6-1326-SM-A9SL8	Normal(n=712)	4.55766	NA	NA
GTEX-1HFI7-0326-SM-9WPOX	Normal(n=712)	3.9542	NA	NA
GTEX-1HGF4-0726-SM-9WYU9	Normal(n=712)	4.25776	NA	NA
GTEX-1HKZK-0826-SM-A9G2C	Normal(n=712)	4.10182	NA	NA
GTEX-1HR98-0326-SM-CGQEL	Normal(n=712)	4.17313	NA	NA
GTEX-1HR9M-0626-SM-A96S6	Normal(n=712)	4.43296	NA	NA
GTEX-1HSEH-0826-SM-B2LXE	Normal(n=712)	4.39438	NA	NA
GTEX-1HSGN-0726-SM-A9G2F	Normal(n=712)	3.77505	NA	NA
GTEX-1HSKV-1026-SM-B2LWK	Normal(n=712)	4.12516	NA	NA
GTEX-1HSMO-0726-SM-A96TM	Normal(n=712)	5.23343	NA	NA
GTEX-1HSMQ-0526-SM-A96TY	Normal(n=712)	4.08406	NA	NA
GTEX-1HT8W-1526-SM-CE6S3	Normal(n=712)	4.34979	NA	NA
GTEX-1HUB1-1226-SM-B2LWX	Normal(n=712)	4.18666	NA	NA
GTEX-1I19N-0226-SM-CE6ST	Normal(n=712)	4.40122	NA	NA
GTEX-1I1GP-0326-SM-CNPQ4	Normal(n=712)	4.06867	NA	NA
GTEX-1I1GQ-0826-SM-CNNQR	Normal(n=712)	3.81865	NA	NA
GTEX-1I1GR-1126-SM-A9G2I	Normal(n=712)	4.20867	NA	NA
GTEX-1I1GS-0726-SM-C1YS7	Normal(n=712)	4.69488	NA	NA
GTEX-1I1GT-0826-SM-B2LWO	Normal(n=712)	3.99548	NA	NA
GTEX-1I1GU-0826-SM-ARZM5	Normal(n=712)	4.38819	NA	NA
GTEX-1I1GV-0726-SM-ARZLY	Normal(n=712)	4.43696	NA	NA
GTEX-1I6K6-0726-SM-B2LX4	Normal(n=712)	4.13668	NA	NA
GTEX-1I6K7-1126-SM-A96SW	Normal(n=712)	3.95513	NA	NA
GTEX-1ICG6-0426-SM-ARU7M	Normal(n=712)	4.10182	NA	NA
GTEX-1ICLY-0726-SM-A96TB	Normal(n=712)	4.37434	NA	NA
GTEX-1ICLZ-0526-SM-ARZM8	Normal(n=712)	4.35826	NA	NA
GTEX-1IDJC-1026-SM-A96T2	Normal(n=712)	3.9607	NA	NA
GTEX-1IDJH-0826-SM-CE6SY	Normal(n=712)	3.99639	NA	NA
GTEX-1IDJU-1626-SM-CJI4B	Normal(n=712)	4.05224	NA	NA
GTEX-1IE54-0926-SM-A9G2Y	Normal(n=712)	4.44493	NA	NA
GTEX-1IGQW-0626-SM-C1YR9	Normal(n=712)	4.42425	NA	NA
GTEX-1IKJJ-1026-SM-A96SQ	Normal(n=712)	3.851	NA	NA
GTEX-1IKOE-0926-SM-ARU7X	Normal(n=712)	4.51475	NA	NA
GTEX-1IKOH-0626-SM-CJI35	Normal(n=712)	3.8953	NA	NA
GTEX-1IL2U-0826-SM-CL53Q	Normal(n=712)	4.43962	NA	NA
GTEX-1IL2V-0626-SM-ARU7S	Normal(n=712)	4.50589	NA	NA
GTEX-1IOXB-1026-SM-CJI4D	Normal(n=712)	3.78031	NA	NA
GTEX-1IY9M-1026-SM-A96TG	Normal(n=712)	4.10434	NA	NA
GTEX-1J1OQ-0526-SM-A9G2P	Normal(n=712)	4.50271	NA	NA
GTEX-1J1R8-0126-SM-CJI36	Normal(n=712)	4.23036	NA	NA
GTEX-1J8EW-1126-SM-A96T8	Normal(n=712)	4.19535	NA	NA
GTEX-1J8JJ-0726-SM-AHZ3E	Normal(n=712)	4.13586	NA	NA
GTEX-1J8Q3-0226-SM-C1YR4	Normal(n=712)	4.37295	NA	NA
GTEX-1J8QM-0726-SM-CE6RF	Normal(n=712)	3.81865	NA	NA
GTEX-1JJ6O-0626-SM-AHZ3H	Normal(n=712)	4.01525	NA	NA
GTEX-1JJE9-0226-SM-CY8HU	Normal(n=712)	4.53419	NA	NA
GTEX-1JJEA-0626-SM-D3L96	Normal(n=712)	4.12598	NA	NA
GTEX-1JK1U-0326-SM-CXZJH	Normal(n=712)	3.90881	NA	NA
GTEX-1JKYN-1126-SM-CGQG5	Normal(n=712)	4.04789	NA	NA
GTEX-1JKYR-0826-SM-ARU8L	Normal(n=712)	4.32625	NA	NA
GTEX-1JMLX-0826-SM-CNNPP	Normal(n=712)	4.25248	NA	NA
GTEX-1JMPY-0126-SM-CJI39	Normal(n=712)	4.32337	NA	NA
GTEX-1JMPZ-0626-SM-CY8HY	Normal(n=712)	4.33557	NA	NA
GTEX-1JMQJ-2026-SM-CNPP9	Normal(n=712)	4.48478	NA	NA
GTEX-1JMQK-2126-SM-CY8I2	Normal(n=712)	4.40259	NA	NA
GTEX-1JMQL-0926-SM-CJI3F	Normal(n=712)	4.07639	NA	NA
GTEX-1JN6P-0626-SM-ARZN6	Normal(n=712)	4.3875	NA	NA
GTEX-1K2DA-1526-SM-CGQGQ	Normal(n=712)	4.07468	NA	NA
GTEX-1K2DU-0126-SM-E9TIU	Normal(n=712)	4.27724	NA	NA
GTEX-1K9T9-0826-SM-EAZ4X	Normal(n=712)	4.11103	NA	NA
GTEX-1KAFJ-0426-SM-DHXJH	Normal(n=712)	4.17473	NA	NA
GTEX-1KANC-0826-SM-D3LA8	Normal(n=712)	3.95233	NA	NA
GTEX-1KD4Q-1026-SM-CXZKJ	Normal(n=712)	4.36597	NA	NA
GTEX-1KD5A-0426-SM-D4P3X	Normal(n=712)	3.85599	NA	NA
GTEX-1KXAM-1726-SM-D3LAE	Normal(n=712)	4.26754	NA	NA
GTEX-1LB8K-0626-SM-D4P3Z	Normal(n=712)	4.43029	NA	NA
GTEX-1LBAC-0726-SM-D3L9U	Normal(n=712)	4.44427	NA	NA
GTEX-1LG7Y-0626-SM-DHXJM	Normal(n=712)	4.06953	NA	NA
GTEX-1LG7Z-0526-SM-D4P3Q	Normal(n=712)	3.64039	NA	NA
GTEX-1LGOU-0126-SM-EV79W	Normal(n=712)	4.3067	NA	NA
GTEX-1LGRB-1226-SM-CNNPS	Normal(n=712)	3.69265	NA	NA
GTEX-1LH75-0626-SM-DIPG3	Normal(n=712)	4.61235	NA	NA
GTEX-1LSVX-0726-SM-E9TJG	Normal(n=712)	4.21257	NA	NA
GTEX-1LVAM-0826-SM-EV79X	Normal(n=712)	3.99729	NA	NA
GTEX-1LVAN-0726-SM-CNNPF	Normal(n=712)	3.83794	NA	NA
GTEX-1M4P7-0626-SM-EVR51	Normal(n=712)	4.40531	NA	NA
GTEX-1MA7X-0926-SM-DIPEJ	Normal(n=712)	4.0197	NA	NA
GTEX-1MCC2-0526-SM-DHXJS	Normal(n=712)	3.73877	NA	NA
GTEX-1MGNQ-0726-SM-DPRYH	Normal(n=712)	4.12846	NA	NA
GTEX-1MJK2-0826-SM-DTXE8	Normal(n=712)	3.68706	NA	NA
GTEX-1MJK3-0326-SM-DTX96	Normal(n=712)	4.1635	NA	NA
GTEX-1MUQO-0726-SM-E9TJM	Normal(n=712)	4.15299	NA	NA
GTEX-1N5O9-1026-SM-DTX8Y	Normal(n=712)	4.01525	NA	NA
GTEX-1NUQO-0926-SM-DTXEX	Normal(n=712)	4.37016	NA	NA
GTEX-1NV5F-0726-SM-DTXEH	Normal(n=712)	3.73877	NA	NA
GTEX-1O97I-1026-SM-E76PI	Normal(n=712)	3.94392	NA	NA
GTEX-1O9I2-1226-SM-E6CQC	Normal(n=712)	4.46336	NA	NA
GTEX-1OFPY-1526-SM-DTX8R	Normal(n=712)	3.76447	NA	NA
GTEX-1OJC3-0626-SM-E8VMO	Normal(n=712)	3.9364	NA	NA
GTEX-1OJC4-0526-SM-E6CQV	Normal(n=712)	4.06695	NA	NA
GTEX-1P4AB-1126-SM-DTX94	Normal(n=712)	4.59634	NA	NA
GTEX-1PBJI-0726-SM-EXUSQ	Normal(n=712)	3.90881	NA	NA
GTEX-1PBJJ-1926-SM-DTX8T	Normal(n=712)	4.22728	NA	NA
GTEX-1PDJ9-0826-SM-E76PS	Normal(n=712)	4.2426	NA	NA
GTEX-1PFEY-0226-SM-EVR3M	Normal(n=712)	4.61589	NA	NA
GTEX-1PIGE-0726-SM-DPRZD	Normal(n=712)	4.01257	NA	NA
GTEX-1PIIG-2026-SM-EVR43	Normal(n=712)	3.98732	NA	NA
GTEX-1PPGY-1426-SM-EVR3R	Normal(n=712)	4.06781	NA	NA
GTEX-1PPH8-0926-SM-DTX9U	Normal(n=712)	4.43896	NA	NA
GTEX-1PWST-0726-SM-EWRMO	Normal(n=712)	4.76022	NA	NA
GTEX-1QAET-0226-SM-EVR3T	Normal(n=712)	3.87971	NA	NA
GTEX-1QCLY-0826-SM-DTX8A	Normal(n=712)	4.26529	NA	NA
GTEX-1QCLZ-0626-SM-E6CR2	Normal(n=712)	4.22265	NA	NA
GTEX-1QEPI-0726-SM-E76QG	Normal(n=712)	4.08916	NA	NA
GTEX-1QMI2-0826-SM-EXUT4	Normal(n=712)	4.02326	NA	NA
GTEX-1QP28-0626-SM-E76P5	Normal(n=712)	3.81352	NA	NA
GTEX-1QP2A-0626-SM-DTX9C	Normal(n=712)	4.07553	NA	NA
GTEX-1QP66-0326-SM-DTX7V	Normal(n=712)	4.37016	NA	NA
GTEX-1QP67-0326-SM-EVR45	Normal(n=712)	4.3147	NA	NA
GTEX-1QP6S-2526-SM-DTX9Z	Normal(n=712)	4.26228	NA	NA
GTEX-1QP9N-0126-SM-DPRZS	Normal(n=712)	4.2426	NA	NA
GTEX-1QPFJ-0626-SM-DTX7Y	Normal(n=712)	4.28318	NA	NA
GTEX-1QW4Y-0226-SM-EAZ3U	Normal(n=712)	3.98914	NA	NA
GTEX-1R46S-0426-SM-EVR48	Normal(n=712)	4.24945	NA	NA
GTEX-1R9JW-0226-SM-EVR4K	Normal(n=712)	4.3799	NA	NA
GTEX-1R9K4-0726-SM-EWRN2	Normal(n=712)	4.54226	NA	NA
GTEX-1R9K5-0726-SM-EAZ4E	Normal(n=712)	4.52732	NA	NA
GTEX-1R9PM-0226-SM-DPRY7	Normal(n=712)	4.67694	NA	NA
GTEX-1RAZA-0826-SM-EAZ4I	Normal(n=712)	4.2765	NA	NA
GTEX-1RAZQ-0926-SM-EAZ4Q	Normal(n=712)	4.26679	NA	NA
GTEX-1RAZR-1126-SM-E6CRC	Normal(n=712)	4.19061	NA	NA
GTEX-1RAZS-1026-SM-E9TID	Normal(n=712)	4.15218	NA	NA
GTEX-1RDX4-0926-SM-E9U6D	Normal(n=712)	4.32625	NA	NA
GTEX-1RMOY-0126-SM-EWRNN	Normal(n=712)	4.2891	NA	NA
GTEX-1RNSC-1126-SM-E9TIP	Normal(n=712)	3.851	NA	NA
GTEX-1RQEC-1026-SM-EVR5B	Normal(n=712)	4.16591	NA	NA
GTEX-1RQED-0926-SM-EWRNZ	Normal(n=712)	3.85499	NA	NA
GTEX-1S5ZU-0726-SM-EWROH	Normal(n=712)	4.69988	NA	NA
GTEX-1S83E-0726-SM-EV7B6	Normal(n=712)	3.94953	NA	NA
GTEX-N7MS-2326-SM-2HMLD	Normal(n=712)	3.9644	NA	NA
GTEX-NFK9-0726-SM-2HMJW	Normal(n=712)	4.16189	NA	NA
GTEX-O5YV-1526-SM-EV799	Normal(n=712)	4.43029	NA	NA
GTEX-OHPK-2626-SM-2HMK9	Normal(n=712)	3.78136	NA	NA
GTEX-OHPL-2626-SM-2HMJA	Normal(n=712)	3.17792	NA	NA
GTEX-OHPM-2626-SM-33HC5	Normal(n=712)	4.04701	NA	NA
GTEX-OIZF-2626-SM-7P8QZ	Normal(n=712)	3.6837	NA	NA
GTEX-OIZG-0226-SM-2TC5L	Normal(n=712)	3.8748	NA	NA
GTEX-OIZI-0726-SM-2XCEI	Normal(n=712)	4.50462	NA	NA
GTEX-OOBJ-2626-SM-2I3F6	Normal(n=712)	4.10266	NA	NA
GTEX-OXRK-0626-SM-2HMJ5	Normal(n=712)	3.97453	NA	NA
GTEX-OXRL-2626-SM-2I3F1	Normal(n=712)	3.70819	NA	NA
GTEX-OXRN-1526-SM-E6CHM	Normal(n=712)	4.19928	NA	NA
GTEX-OXRO-1226-SM-48TDL	Normal(n=712)	4.90785	NA	NA
GTEX-OXRP-0326-SM-33HBJ	Normal(n=712)	4.39849	NA	NA
GTEX-P44G-0626-SM-2I5EO	Normal(n=712)	3.76553	NA	NA
GTEX-P4PQ-2626-SM-33HC9	Normal(n=712)	4.25852	NA	NA
GTEX-P4QS-2626-SM-2I3EV	Normal(n=712)	4.28244	NA	NA
GTEX-P4QT-2626-SM-2I3FM	Normal(n=712)	3.70377	NA	NA
GTEX-P78B-0526-SM-2I5F7	Normal(n=712)	3.94205	NA	NA
GTEX-PLZ4-1226-SM-2I5FE	Normal(n=712)	4.2502	NA	NA
GTEX-POYW-0826-SM-2XCEM	Normal(n=712)	5.47638	NA	NA
GTEX-PWCY-2326-SM-2I3EQ	Normal(n=712)	4.09592	NA	NA
GTEX-PWN1-2626-SM-2I3FH	Normal(n=712)	4.26828	NA	NA
GTEX-PX3G-2626-SM-2I3EG	Normal(n=712)	4.25701	NA	NA
GTEX-Q2AG-0826-SM-2HMKF	Normal(n=712)	4.43962	NA	NA
GTEX-Q2AH-0726-SM-2I3EA	Normal(n=712)	4.04876	NA	NA
GTEX-Q2AI-0326-SM-2I3EK	Normal(n=712)	4.0917	NA	NA
GTEX-Q734-0526-SM-2I3EH	Normal(n=712)	4.31832	NA	NA
GTEX-QDT8-1226-SM-EVR35	Normal(n=712)	4.84699	NA	NA
GTEX-QDVJ-0226-SM-2I5FV	Normal(n=712)	3.82579	NA	NA
GTEX-QDVN-0626-SM-2I3FP	Normal(n=712)	4.17073	NA	NA
GTEX-QEG5-0826-SM-2I5GF	Normal(n=712)	3.96993	NA	NA
GTEX-QEL4-0726-SM-3GIJ5	Normal(n=712)	4.51223	NA	NA
GTEX-QLQ7-0726-SM-2I5G2	Normal(n=712)	4.00809	NA	NA
GTEX-QV31-0726-SM-3GAEG	Normal(n=712)	3.99458	NA	NA
GTEX-QV44-0826-SM-2S1RG	Normal(n=712)	4.49953	NA	NA
GTEX-QXCU-0326-SM-2TC63	Normal(n=712)	4.47573	NA	NA
GTEX-R3RS-0726-SM-3GIJR	Normal(n=712)	4.26529	NA	NA
GTEX-R53T-0526-SM-3GADL	Normal(n=712)	4.48414	NA	NA
GTEX-R55C-0626-SM-2TF4Q	Normal(n=712)	4.38198	NA	NA
GTEX-R55E-0826-SM-2TC5M	Normal(n=712)	4.06005	NA	NA
GTEX-R55G-0726-SM-2TC6J	Normal(n=712)	4.22497	NA	NA
GTEX-REY6-0526-SM-2TF5M	Normal(n=712)	4.65821	NA	NA
GTEX-RM2N-0526-SM-2TF4N	Normal(n=712)	4.36667	NA	NA
GTEX-RN5K-2826-SM-EZ6L3	Normal(n=712)	4.40259	NA	NA
GTEX-RN64-0626-SM-2TC5V	Normal(n=712)	4.38336	NA	NA
GTEX-RNOR-0926-SM-2TF56	Normal(n=712)	4.22959	NA	NA
GTEX-RTLS-0626-SM-5SI7Z	Normal(n=712)	4.2032	NA	NA
GTEX-RU1J-0226-SM-2TF5Y	Normal(n=712)	4.28021	NA	NA
GTEX-RU72-0126-SM-2TF6Z	Normal(n=712)	4.10518	NA	NA
GTEX-RUSQ-1026-SM-2TF6V	Normal(n=712)	3.85599	NA	NA
GTEX-RVPV-1226-SM-2TF73	Normal(n=712)	3.7301	NA	NA
GTEX-RWS6-0626-SM-2XCAS	Normal(n=712)	4.28836	NA	NA
GTEX-RWSA-0826-SM-2XCBF	Normal(n=712)	4.33914	NA	NA
GTEX-S32W-0726-SM-2XCBL	Normal(n=712)	3.99729	NA	NA
GTEX-S341-0226-SM-D4P1Y	Normal(n=712)	4.13093	NA	NA
GTEX-S7SE-0726-SM-2XCD7	Normal(n=712)	4.3067	NA	NA
GTEX-S7SF-0226-SM-5SI7H	Normal(n=712)	4.15137	NA	NA
GTEX-SE5C-0726-SM-4BRWY	Normal(n=712)	4.17632	NA	NA
GTEX-SIU8-0626-SM-2XCDN	Normal(n=712)	4.21257	NA	NA
GTEX-SJXC-0726-SM-2XCFJ	Normal(n=712)	4.44427	NA	NA
GTEX-SN8G-1526-SM-4DM79	Normal(n=712)	4.38819	NA	NA
GTEX-SNOS-0226-SM-32PLR	Normal(n=712)	4.25852	NA	NA
GTEX-SUCS-0226-SM-32PLQ	Normal(n=712)	4.26078	NA	NA
GTEX-T2IS-0626-SM-32QP6	Normal(n=712)	4.43962	NA	NA
GTEX-T5JW-1226-SM-3GACY	Normal(n=712)	4.41549	NA	NA
GTEX-T6MN-0626-SM-32PM9	Normal(n=712)	4.29057	NA	NA
GTEX-T6MO-0226-SM-32QOL	Normal(n=712)	4.13586	NA	NA
GTEX-T8EM-0226-SM-3DB7C	Normal(n=712)	4.16672	NA	NA
GTEX-TKQ1-0126-SM-33HB3	Normal(n=712)	4.32984	NA	NA
GTEX-TMMY-0826-SM-33HB9	Normal(n=712)	3.9982	NA	NA
GTEX-TSE9-0626-SM-3DB8B	Normal(n=712)	4.92837	NA	NA
GTEX-U3ZH-0226-SM-3DB7B	Normal(n=712)	3.79701	NA	NA
GTEX-U3ZM-0126-SM-3DB8M	Normal(n=712)	4.20633	NA	NA
GTEX-U3ZN-0326-SM-3DB86	Normal(n=712)	4.43029	NA	NA
GTEX-U412-0726-SM-EVR2Y	Normal(n=712)	4.40871	NA	NA
GTEX-U4B1-0626-SM-3DB8L	Normal(n=712)	4.51602	NA	NA
GTEX-U8T8-2326-SM-3DB96	Normal(n=712)	4.53916	NA	NA
GTEX-UJMC-0326-SM-3GAE2	Normal(n=712)	4.33342	NA	NA
GTEX-V1D1-0926-SM-4JBHQ	Normal(n=712)	4.57833	NA	NA
GTEX-V955-0426-SM-3GAEL	Normal(n=712)	4.4363	NA	NA
GTEX-VJYA-0426-SM-3GIJK	Normal(n=712)	4.48156	NA	NA
GTEX-VUSG-0426-SM-3GIKD	Normal(n=712)	4.28096	NA	NA
GTEX-W5WG-1426-SM-4KKZP	Normal(n=712)	3.87381	NA	NA
GTEX-W5X1-0426-SM-3GILB	Normal(n=712)	4.33557	NA	NA
GTEX-WEY5-0526-SM-3GIKZ	Normal(n=712)	3.79077	NA	NA
GTEX-WFG7-0326-SM-DKPO8	Normal(n=712)	4.04089	NA	NA
GTEX-WFG8-0426-SM-3GILD	Normal(n=712)	3.96162	NA	NA
GTEX-WFJO-0226-SM-3GIKW	Normal(n=712)	3.91265	NA	NA
GTEX-WH7G-0526-SM-3NMBI	Normal(n=712)	4.03562	NA	NA
GTEX-WHPG-0226-SM-3NMB9	Normal(n=712)	4.05485	NA	NA
GTEX-WHSB-1626-SM-3LK6J	Normal(n=712)	4.11187	NA	NA
GTEX-WHSE-0626-SM-4RGNF	Normal(n=712)	4.34199	NA	NA
GTEX-WK11-0926-SM-3NMAU	Normal(n=712)	4.23113	NA	NA
GTEX-WL46-0126-SM-3TW8I	Normal(n=712)	4.20398	NA	NA
GTEX-WOFL-0726-SM-3MJG4	Normal(n=712)	4.23802	NA	NA
GTEX-WRHU-0926-SM-4E3IG	Normal(n=712)	4.1819	NA	NA
GTEX-WVLH-0626-SM-3MJG7	Normal(n=712)	4.28836	NA	NA
GTEX-WWYW-0826-SM-3NB2X	Normal(n=712)	4.32409	NA	NA
GTEX-WXYG-0226-SM-3NB2Y	Normal(n=712)	3.91552	NA	NA
GTEX-WY7C-0226-SM-3NB37	Normal(n=712)	3.9607	NA	NA
GTEX-WYBS-1926-SM-3NM8N	Normal(n=712)	4.25776	NA	NA
GTEX-WYJK-1626-SM-3NM9J	Normal(n=712)	4.44228	NA	NA
GTEX-WYVS-0326-SM-3NM9V	Normal(n=712)	4.29866	NA	NA
GTEX-X15G-0526-SM-3NMB7	Normal(n=712)	4.28318	NA	NA
GTEX-X261-0726-SM-EZ6MH	Normal(n=712)	4.57168	NA	NA
GTEX-X4LF-0426-SM-3NMB5	Normal(n=712)	4.10769	NA	NA
GTEX-X4XX-0926-SM-46MV7	Normal(n=712)	4.37226	NA	NA
GTEX-X4XY-0826-SM-4E3JM	Normal(n=712)	4.23802	NA	NA
GTEX-X5EB-0726-SM-46MVR	Normal(n=712)	4.2502	NA	NA
GTEX-X8HC-0726-SM-46MWG	Normal(n=712)	4.48736	NA	NA
GTEX-XBED-0126-SM-47JY7	Normal(n=712)	4.23573	NA	NA
GTEX-XBEW-0126-SM-4AT66	Normal(n=712)	4.14241	NA	NA
GTEX-XGQ4-0426-SM-4AT4I	Normal(n=712)	4.38128	NA	NA
GTEX-XLM4-0726-SM-4AT64	Normal(n=712)	4.41007	NA	NA
GTEX-XMK1-0626-SM-4B65A	Normal(n=712)	4.08661	NA	NA
GTEX-XOT4-1526-SM-EAZ2W	Normal(n=712)	4.3427	NA	NA
GTEX-XUW1-1026-SM-4BONY	Normal(n=712)	4.17552	NA	NA
GTEX-XUZC-0126-SM-4BOO6	Normal(n=712)	3.99277	NA	NA
GTEX-XV7Q-0326-SM-4BRVM	Normal(n=712)	4.10266	NA	NA
GTEX-XXEK-1326-SM-4BRV1	Normal(n=712)	4.27947	NA	NA
GTEX-XYKS-0826-SM-4BRVF	Normal(n=712)	3.73552	NA	NA
GTEX-Y111-1926-SM-4SOIS	Normal(n=712)	4.08491	NA	NA
GTEX-Y114-0626-SM-4TT98	Normal(n=712)	4.17712	NA	NA
GTEX-Y3I4-0226-SM-4TT27	Normal(n=712)	3.78869	NA	NA
GTEX-Y3IK-0526-SM-4WWE3	Normal(n=712)	3.848	NA	NA
GTEX-Y5LM-0626-SM-4V6G4	Normal(n=712)	4.18507	NA	NA
GTEX-Y5V5-0326-SM-5RQJG	Normal(n=712)	4.16912	NA	NA
GTEX-Y5V6-0526-SM-4VBRV	Normal(n=712)	3.91552	NA	NA
GTEX-Y8E4-0126-SM-4VBQ2	Normal(n=712)	4.08661	NA	NA
GTEX-Y9LG-0426-SM-4VBRT	Normal(n=712)	4.09424	NA	NA
GTEX-YB5E-0626-SM-4VDSE	Normal(n=712)	3.69488	NA	NA
GTEX-YB5K-0526-SM-5LUAS	Normal(n=712)	4.41278	NA	NA
GTEX-YEC3-0826-SM-4WWFP	Normal(n=712)	3.34142	NA	NA
GTEX-YEC4-0626-SM-5CVLU	Normal(n=712)	4.04177	NA	NA
GTEX-YF7O-0726-SM-4W213	Normal(n=712)	4.01436	NA	NA
GTEX-YFC4-2626-SM-5P9FQ	Normal(n=712)	4.33842	NA	NA
GTEX-YFCO-0326-SM-4W1ZP	Normal(n=712)	3.61824	NA	NA
GTEX-YJ89-0726-SM-5P9F7	Normal(n=712)	4.27202	NA	NA
GTEX-Z93S-0526-SM-EVYB4	Normal(n=712)	3.89918	NA	NA
GTEX-Z9EW-0226-SM-5CVM7	Normal(n=712)	3.9279	NA	NA
GTEX-ZA64-0426-SM-5HL96	Normal(n=712)	4.11187	NA	NA
GTEX-ZAB5-0726-SM-5P9JG	Normal(n=712)	4.29131	NA	NA
GTEX-ZAJG-0726-SM-5HL9A	Normal(n=712)	4.66903	NA	NA
GTEX-ZAK1-0726-SM-5HL8Q	Normal(n=712)	4.26003	NA	NA
GTEX-ZC5H-0626-SM-5LU9K	Normal(n=712)	4.18031	NA	NA
GTEX-ZDTS-0926-SM-5YY9D	Normal(n=712)	4.13258	NA	NA
GTEX-ZDXO-1726-SM-5HL6L	Normal(n=712)	4.30597	NA	NA
GTEX-ZDYS-0626-SM-5J2N5	Normal(n=712)	3.9607	NA	NA
GTEX-ZE7O-1126-SM-57WC8	Normal(n=712)	4.51223	NA	NA
GTEX-ZF28-0826-SM-4WKGJ	Normal(n=712)	4.33557	NA	NA
GTEX-ZF29-0726-SM-DO92H	Normal(n=712)	3.85499	NA	NA
GTEX-ZF3C-0826-SM-DO11E	Normal(n=712)	4.32337	NA	NA
GTEX-ZGAY-1026-SM-4WWBR	Normal(n=712)	4.14323	NA	NA
GTEX-ZLFU-0626-SM-4WWBO	Normal(n=712)	4.50843	NA	NA
GTEX-ZLV1-0126-SM-4WWBZ	Normal(n=712)	3.71699	NA	NA
GTEX-ZLWG-0526-SM-4WWFB	Normal(n=712)	3.91073	NA	NA
GTEX-ZPCL-0126-SM-4WWC8	Normal(n=712)	3.99367	NA	NA
GTEX-ZPIC-0226-SM-DO91T	Normal(n=712)	4.10098	NA	NA
GTEX-ZPU1-0426-SM-4WWCA	Normal(n=712)	4.30086	NA	NA
GTEX-ZQG8-0926-SM-57WFF	Normal(n=712)	3.91169	NA	NA
GTEX-ZQUD-0126-SM-7EPIS	Normal(n=712)	4.23879	NA	NA
GTEX-ZT9W-0226-SM-7SB6H	Normal(n=712)	3.6017	NA	NA
GTEX-ZT9X-0226-SM-51MT2	Normal(n=712)	4.17393	NA	NA
GTEX-ZTPG-0826-SM-5DUVC	Normal(n=712)	4.03034	NA	NA
GTEX-ZTSS-0226-SM-59877	Normal(n=712)	4.48543	NA	NA
GTEX-ZTX8-0626-SM-59HKC	Normal(n=712)	4.05398	NA	NA
GTEX-ZUA1-0926-SM-4YCDX	Normal(n=712)	4.82731	NA	NA
GTEX-ZV6S-0226-SM-59HJT	Normal(n=712)	3.88557	NA	NA
GTEX-ZV7C-0126-SM-57WDE	Normal(n=712)	4.36247	NA	NA
GTEX-ZVP2-0426-SM-57WC2	Normal(n=712)	3.90207	NA	NA
GTEX-ZVT3-0726-SM-5GICN	Normal(n=712)	4.52105	NA	NA
GTEX-ZVZP-1026-SM-5GICI	Normal(n=712)	3.81147	NA	NA
GTEX-ZVZQ-0626-SM-59HJU	Normal(n=712)	4.66164	NA	NA
GTEX-ZXG5-0926-SM-5NQ8H	Normal(n=712)	4.38267	NA	NA
GTEX-ZY6K-0226-SM-5SIAY	Normal(n=712)	3.99367	NA	NA
GTEX-ZYFC-0926-SM-5GZWW	Normal(n=712)	4.13586	NA	NA
GTEX-ZYFD-0826-SM-5NQ9A	Normal(n=712)	4.51033	NA	NA
GTEX-ZYFG-0626-SM-5GZYA	Normal(n=712)	3.8846	NA	NA
GTEX-ZYT6-0426-SM-5GID3	Normal(n=712)	4.25701	NA	NA
GTEX-ZYVF-1126-SM-5E458	Normal(n=712)	4.51412	NA	NA
GTEX-ZYW4-1126-SM-5SI99	Normal(n=712)	4.60703	NA	NA
GTEX-ZYY3-1926-SM-5GZXS	Normal(n=712)	3.88069	NA	NA
GTEX-ZZ64-0126-SM-5GZXA	Normal(n=712)	4.04789	NA	NA
GTEX-ZZPU-1326-SM-5GZWS	Normal(n=712)	4.15056	NA	NA

## Sheet: ZCCHC9
rownames(datas)	Type	values	times	status
TCGA-IM-A420-01	G1(n=288)	3.41645	NA	NA
TCGA-EM-A3FO-01	G1(n=288)	4.04975	NA	NA
TCGA-EL-A3H7-01	G1(n=288)	3.35027	NA	NA
TCGA-BJ-A0ZC-01	G1(n=288)	3.69153	NA	NA
TCGA-EM-A4FO-01	G1(n=288)	3.5063	NA	NA
TCGA-DJ-A2PO-01	G1(n=288)	3.91477	NA	NA
TCGA-EL-A3ZT-01	G1(n=288)	3.9658	NA	NA
TCGA-DJ-A13O-01	G1(n=288)	3.49144	NA	NA
TCGA-EM-A1CW-01	G1(n=288)	3.05499	NA	NA
TCGA-E3-A3E2-01	G1(n=288)	4.65124	NA	NA
TCGA-E8-A416-01	G1(n=288)	4.13782	NA	NA
TCGA-ET-A2N3-01	G1(n=288)	3.6837	NA	NA
TCGA-DJ-A4V0-01	G1(n=288)	3.61454	NA	NA
TCGA-EL-A3T6-01	G1(n=288)	3.40171	NA	NA
TCGA-ET-A3BO-01	G1(n=288)	4.14503	NA	NA
TCGA-CE-A481-01	G1(n=288)	4.40765	NA	NA
TCGA-E8-A419-01	G1(n=288)	3.68492	NA	NA
TCGA-E8-A438-01	G1(n=288)	3.58691	NA	NA
TCGA-E3-A3E0-01	G1(n=288)	4.51576	NA	NA
TCGA-ET-A3DS-01	G1(n=288)	3.70408	NA	NA
TCGA-DJ-A4UL-01	G1(n=288)	4.2479	NA	NA
TCGA-EM-A2CK-01	G1(n=288)	3.75299	NA	NA
TCGA-J8-A3O1-01	G1(n=288)	3.93086	NA	NA
TCGA-FE-A237-01	G1(n=288)	3.63222	NA	NA
TCGA-EM-A3O8-01	G1(n=288)	4.16063	NA	NA
TCGA-H2-A2K9-01	G1(n=288)	4.40888	NA	NA
TCGA-DJ-A1QM-01	G1(n=288)	3.36236	NA	NA
TCGA-H2-A3RH-01	G1(n=288)	4.56125	NA	NA
TCGA-IM-A41Z-01	G1(n=288)	3.51073	NA	NA
TCGA-IM-A3EB-01	G1(n=288)	3.46817	NA	NA
TCGA-EL-A3ZN-01	G1(n=288)	4.49663	NA	NA
TCGA-EL-A3ZS-01	G1(n=288)	4.20124	NA	NA
TCGA-EL-A3GR-01	G1(n=288)	4.05761	NA	NA
TCGA-ET-A39R-01	G1(n=288)	4.11217	NA	NA
TCGA-ET-A25O-01	G1(n=288)	3.87545	NA	NA
TCGA-BJ-A2N8-01	G1(n=288)	4.30185	NA	NA
TCGA-DJ-A13W-01	G1(n=288)	1.23303	NA	NA
TCGA-EL-A3N2-01	G1(n=288)	3.93497	NA	NA
TCGA-EM-A4FF-01	G1(n=288)	3.6376	NA	NA
TCGA-KS-A4I3-01	G1(n=288)	3.58368	NA	NA
TCGA-EM-A1CV-01	G1(n=288)	4.03923	NA	NA
TCGA-BJ-A3PR-01	G1(n=288)	3.57278	NA	NA
TCGA-BJ-A45J-01	G1(n=288)	4.72254	NA	NA
TCGA-EM-A3SY-01	G1(n=288)	2.68623	NA	NA
TCGA-FK-A3S3-01	G1(n=288)	3.92575	NA	NA
TCGA-FY-A3NP-01	G1(n=288)	3.92092	NA	NA
TCGA-FY-A3BL-01	G1(n=288)	3.44495	NA	NA
TCGA-MK-A4N6-01	G1(n=288)	3.54895	NA	NA
TCGA-E8-A437-01	G1(n=288)	3.59735	NA	NA
TCGA-EM-A3FL-01	G1(n=288)	3.1731	NA	NA
TCGA-J8-A3YH-01	G1(n=288)	4.67884	NA	NA
TCGA-E8-A433-01	G1(n=288)	3.44993	NA	NA
TCGA-E8-A2EA-01	G1(n=288)	3.66749	NA	NA
TCGA-ET-A3BU-01	G1(n=288)	3.93815	NA	NA
TCGA-EL-A4K0-01	G1(n=288)	4.55054	NA	NA
TCGA-DJ-A2PR-01	G1(n=288)	4.38579	NA	NA
TCGA-DJ-A3VJ-01	G1(n=288)	4.46066	NA	NA
TCGA-ET-A3DO-01	G1(n=288)	3.5213	NA	NA
TCGA-DJ-A3UV-01	G1(n=288)	4.11965	NA	NA
TCGA-J8-A3O2-06	G1(n=288)	4.86515	NA	NA
TCGA-IM-A4EB-01	G1(n=288)	3.26861	NA	NA
TCGA-FE-A234-01	G1(n=288)	3.99407	NA	NA
TCGA-EM-A2CQ-01	G1(n=288)	3.21846	NA	NA
TCGA-FY-A40K-01	G1(n=288)	4.42017	NA	NA
TCGA-ET-A40P-01	G1(n=288)	4.27189	NA	NA
TCGA-EL-A4KH-01	G1(n=288)	3.7122	NA	NA
TCGA-CE-A27D-01	G1(n=288)	3.77724	NA	NA
TCGA-KS-A4I7-01	G1(n=288)	4.57123	NA	NA
TCGA-EM-A3SZ-01	G1(n=288)	3.83372	NA	NA
TCGA-DJ-A4V4-01	G1(n=288)	3.66788	NA	NA
TCGA-EL-A4KG-01	G1(n=288)	3.78906	NA	NA
TCGA-FE-A3PD-01	G1(n=288)	4.78099	NA	NA
TCGA-ET-A40R-01	G1(n=288)	4.42042	NA	NA
TCGA-EM-A4FK-01	G1(n=288)	3.91345	NA	NA
TCGA-BJ-A2N9-01	G1(n=288)	3.57243	NA	NA
TCGA-EM-A22Q-01	G1(n=288)	2.32915	NA	NA
TCGA-FE-A23A-01	G1(n=288)	3.04494	NA	NA
TCGA-J8-A3O0-01	G1(n=288)	3.91577	NA	NA
TCGA-IM-A3ED-01	G1(n=288)	3.92529	NA	NA
TCGA-BJ-A18Y-01	G1(n=288)	3.99727	NA	NA
TCGA-EL-A3GZ-01	G1(n=288)	4.61366	NA	NA
TCGA-BJ-A0ZJ-01	G1(n=288)	4.03241	NA	NA
TCGA-FE-A232-01	G1(n=288)	3.54052	NA	NA
TCGA-DJ-A3UP-01	G1(n=288)	4.15037	NA	NA
TCGA-DJ-A1QN-01	G1(n=288)	4.84056	NA	NA
TCGA-EM-A3AJ-01	G1(n=288)	3.84261	NA	NA
TCGA-BJ-A45K-01	G1(n=288)	3.5799	NA	NA
TCGA-DJ-A3V2-01	G1(n=288)	4.42479	NA	NA
TCGA-J8-A3O2-01	G1(n=288)	4.63314	NA	NA
TCGA-ET-A3BN-01	G1(n=288)	3.61114	NA	NA
TCGA-FY-A3R9-01	G1(n=288)	2.9091	NA	NA
TCGA-KS-A41J-01	G1(n=288)	3.67698	NA	NA
TCGA-EL-A4K2-01	G1(n=288)	3.99404	NA	NA
TCGA-FY-A3WA-01	G1(n=288)	4.28972	NA	NA
TCGA-DJ-A13S-01	G1(n=288)	3.49371	NA	NA
TCGA-EM-A2P1-06	G1(n=288)	3.4424	NA	NA
TCGA-DJ-A3US-01	G1(n=288)	4.14035	NA	NA
TCGA-ET-A39N-01	G1(n=288)	3.89991	NA	NA
TCGA-EM-A4FV-01	G1(n=288)	4.20963	NA	NA
TCGA-ET-A40T-01	G1(n=288)	4.35885	NA	NA
TCGA-ET-A25J-01	G1(n=288)	3.46288	NA	NA
TCGA-BJ-A28R-01	G1(n=288)	3.6927	NA	NA
TCGA-BJ-A3F0-01	G1(n=288)	3.32308	NA	NA
TCGA-E3-A3E1-01	G1(n=288)	3.6122	NA	NA
TCGA-DJ-A3UM-01	G1(n=288)	4.16262	NA	NA
TCGA-BJ-A291-01	G1(n=288)	3.0186	NA	NA
TCGA-E8-A417-01	G1(n=288)	3.83608	NA	NA
TCGA-FE-A235-01	G1(n=288)	4.24923	NA	NA
TCGA-CE-A483-01	G1(n=288)	4.04397	NA	NA
TCGA-KS-A41F-01	G1(n=288)	2.25758	NA	NA
TCGA-ET-A39S-01	G1(n=288)	4.10767	NA	NA
TCGA-DJ-A3VL-01	G1(n=288)	3.83099	NA	NA
TCGA-ET-A25K-01	G1(n=288)	3.86397	NA	NA
TCGA-ET-A3BS-01	G1(n=288)	4.70108	NA	NA
TCGA-H2-A421-01	G1(n=288)	3.75306	NA	NA
TCGA-KS-A41I-01	G1(n=288)	1.92056	NA	NA
TCGA-EL-A3GO-01	G1(n=288)	4.48251	NA	NA
TCGA-EM-A2CL-01	G1(n=288)	3.83868	NA	NA
TCGA-MK-A4N7-01	G1(n=288)	4.74357	NA	NA
TCGA-CE-A13K-01	G1(n=288)	4.33817	NA	NA
TCGA-DJ-A1QQ-01	G1(n=288)	3.91755	NA	NA
TCGA-EL-A3H3-01	G1(n=288)	3.94486	NA	NA
TCGA-DJ-A4UP-01	G1(n=288)	3.91839	NA	NA
TCGA-DE-A7U5-01	G1(n=288)	3.43683	NA	NA
TCGA-DJ-A3VA-01	G1(n=288)	4.43427	NA	NA
TCGA-DJ-A4UT-01	G1(n=288)	3.7028	NA	NA
TCGA-ET-A25I-01	G1(n=288)	2.62852	NA	NA
TCGA-BJ-A45E-01	G1(n=288)	2.04278	NA	NA
TCGA-EM-A2CT-01	G1(n=288)	3.75472	NA	NA
TCGA-FY-A3ON-01	G1(n=288)	4.45032	NA	NA
TCGA-BJ-A28W-01	G1(n=288)	3.08142	NA	NA
TCGA-EL-A3CX-01	G1(n=288)	3.99705	NA	NA
TCGA-DJ-A4V2-01	G1(n=288)	3.78786	NA	NA
TCGA-ET-A39M-01	G1(n=288)	3.5213	NA	NA
TCGA-FK-A3SB-01	G1(n=288)	4.46366	NA	NA
TCGA-H2-A422-01	G1(n=288)	3.61874	NA	NA
TCGA-DJ-A3UT-01	G1(n=288)	3.66003	NA	NA
TCGA-FK-A3SD-01	G1(n=288)	3.54298	NA	NA
TCGA-FY-A4B0-01	G1(n=288)	3.74443	NA	NA
TCGA-ET-A2MZ-01	G1(n=288)	4.15066	NA	NA
TCGA-E8-A2JQ-01	G1(n=288)	3.12966	NA	NA
TCGA-ET-A39L-01	G1(n=288)	4.01678	NA	NA
TCGA-EM-A3AP-01	G1(n=288)	4.08159	NA	NA
TCGA-MK-A4N9-01	G1(n=288)	4.4924	NA	NA
TCGA-DJ-A2PN-01	G1(n=288)	3.78452	NA	NA
TCGA-E3-A3DY-01	G1(n=288)	4.28718	NA	NA
TCGA-DJ-A3VD-01	G1(n=288)	3.74687	NA	NA
TCGA-ET-A3DP-01	G1(n=288)	4.06432	NA	NA
TCGA-EL-A4JW-01	G1(n=288)	3.33721	NA	NA
TCGA-E8-A415-01	G1(n=288)	3.98193	NA	NA
TCGA-ET-A3DU-01	G1(n=288)	2.97992	NA	NA
TCGA-FK-A3SE-01	G1(n=288)	3.94732	NA	NA
TCGA-DE-A69J-01	G1(n=288)	4.0921	NA	NA
TCGA-EL-A4K4-01	G1(n=288)	3.17809	NA	NA
TCGA-ET-A39I-01	G1(n=288)	3.76791	NA	NA
TCGA-EL-A3CZ-01	G1(n=288)	3.70908	NA	NA
TCGA-DJ-A1QG-01	G1(n=288)	3.18	NA	NA
TCGA-GE-A2C6-01	G1(n=288)	3.759	NA	NA
TCGA-DJ-A3UN-01	G1(n=288)	3.95901	NA	NA
TCGA-EL-A3ZP-01	G1(n=288)	4.08706	NA	NA
TCGA-J8-A3YE-01	G1(n=288)	3.91218	NA	NA
TCGA-DJ-A13T-01	G1(n=288)	4.22548	NA	NA
TCGA-EM-A3FQ-01	G1(n=288)	4.20141	NA	NA
TCGA-DJ-A3UY-01	G1(n=288)	3.63727	NA	NA
TCGA-FE-A230-01	G1(n=288)	2.93423	NA	NA
TCGA-EL-A3H1-01	G1(n=288)	3.81649	NA	NA
TCGA-DJ-A2PS-01	G1(n=288)	4.56115	NA	NA
TCGA-EM-A1CU-01	G1(n=288)	3.80591	NA	NA
TCGA-ET-A40Q-01	G1(n=288)	3.83027	NA	NA
TCGA-EL-A3ZH-01	G1(n=288)	3.77405	NA	NA
TCGA-ET-A3BQ-01	G1(n=288)	4.26846	NA	NA
TCGA-ET-A3BX-01	G1(n=288)	3.57725	NA	NA
TCGA-EL-A3ZL-01	G1(n=288)	3.68743	NA	NA
TCGA-EM-A22N-01	G1(n=288)	2.56081	NA	NA
TCGA-BJ-A2N7-01	G1(n=288)	3.79776	NA	NA
TCGA-DJ-A1QD-01	G1(n=288)	3.46813	NA	NA
TCGA-BJ-A45D-01	G1(n=288)	3.41224	NA	NA
TCGA-ET-A2MX-01	G1(n=288)	3.17621	NA	NA
TCGA-EM-A3AN-01	G1(n=288)	4.56948	NA	NA
TCGA-CE-A482-01	G1(n=288)	4.30301	NA	NA
TCGA-FY-A3RA-01	G1(n=288)	3.93696	NA	NA
TCGA-DE-A0Y2-01	G1(n=288)	3.41706	NA	NA
TCGA-BJ-A0ZG-01	G1(n=288)	3.56031	NA	NA
TCGA-DJ-A2PQ-01	G1(n=288)	4.21642	NA	NA
TCGA-DJ-A3VG-01	G1(n=288)	3.90922	NA	NA
TCGA-E8-A434-01	G1(n=288)	4.07723	NA	NA
TCGA-DJ-A2Q6-01	G1(n=288)	4.64411	NA	NA
TCGA-DJ-A2Q1-01	G1(n=288)	3.1044	NA	NA
TCGA-EM-A2P3-01	G1(n=288)	4.02297	NA	NA
TCGA-BJ-A28T-01	G1(n=288)	3.4198	NA	NA
TCGA-ET-A39O-01	G1(n=288)	3.41948	NA	NA
TCGA-EL-A3T1-01	G1(n=288)	3.51489	NA	NA
TCGA-E8-A44M-01	G1(n=288)	4.1377	NA	NA
TCGA-EM-A1CS-01	G1(n=288)	4.24283	NA	NA
TCGA-CE-A485-01	G1(n=288)	4.21952	NA	NA
TCGA-BJ-A0Z3-01	G1(n=288)	4.4073	NA	NA
TCGA-EL-A3ZK-01	G1(n=288)	3.32644	NA	NA
TCGA-EM-A3FJ-01	G1(n=288)	4.6925	NA	NA
TCGA-E8-A44K-01	G1(n=288)	3.24071	NA	NA
TCGA-EL-A3H8-01	G1(n=288)	4.51783	NA	NA
TCGA-BJ-A191-01	G1(n=288)	4.83423	NA	NA
TCGA-FY-A40M-01	G1(n=288)	4.41034	NA	NA
TCGA-EM-A2OZ-01	G1(n=288)	3.88505	NA	NA
TCGA-BJ-A28X-01	G1(n=288)	3.75398	NA	NA
TCGA-EL-A3GW-01	G1(n=288)	4.19067	NA	NA
TCGA-EM-A3FQ-06	G1(n=288)	3.65517	NA	NA
TCGA-IM-A41Y-01	G1(n=288)	3.51206	NA	NA
TCGA-DJ-A13L-01	G1(n=288)	4.06796	NA	NA
TCGA-DO-A1JZ-01	G1(n=288)	3.81291	NA	NA
TCGA-ET-A2MY-01	G1(n=288)	3.26188	NA	NA
TCGA-EL-A3T8-01	G1(n=288)	4.08474	NA	NA
TCGA-ET-A25P-01	G1(n=288)	4.05454	NA	NA
TCGA-EM-A3FK-01	G1(n=288)	4.09766	NA	NA
TCGA-H2-A3RI-01	G1(n=288)	4.03518	NA	NA
TCGA-DJ-A3V8-01	G1(n=288)	3.9075	NA	NA
TCGA-EM-A3SU-06	G1(n=288)	3.68958	NA	NA
TCGA-EL-A3CV-01	G1(n=288)	3.65745	NA	NA
TCGA-BJ-A45F-01	G1(n=288)	2.92649	NA	NA
TCGA-KS-A41L-01	G1(n=288)	3.4464	NA	NA
TCGA-DO-A1K0-01	G1(n=288)	3.64669	NA	NA
TCGA-EM-A3SX-01	G1(n=288)	4.22243	NA	NA
TCGA-ET-A39J-01	G1(n=288)	4.2303	NA	NA
TCGA-L6-A4EP-01	G1(n=288)	4.24929	NA	NA
TCGA-DJ-A13V-01	G1(n=288)	4.18852	NA	NA
TCGA-DE-A2OL-01	G1(n=288)	3.63459	NA	NA
TCGA-FY-A3I4-01	G1(n=288)	3.3336	NA	NA
TCGA-EM-A4FQ-01	G1(n=288)	3.10616	NA	NA
TCGA-EM-A2P1-01	G1(n=288)	3.64242	NA	NA
TCGA-EL-A3GQ-01	G1(n=288)	4.43393	NA	NA
TCGA-EL-A4JV-01	G1(n=288)	3.97972	NA	NA
TCGA-EL-A3D1-01	G1(n=288)	3.20608	NA	NA
TCGA-KS-A4ID-01	G1(n=288)	3.16517	NA	NA
TCGA-FY-A40N-01	G1(n=288)	4.31951	NA	NA
TCGA-FE-A233-01	G1(n=288)	3.3269	NA	NA
TCGA-DJ-A4UW-01	G1(n=288)	3.94609	NA	NA
TCGA-EM-A3AL-01	G1(n=288)	3.58967	NA	NA
TCGA-J8-A3YH-06	G1(n=288)	4.57427	NA	NA
TCGA-FE-A236-01	G1(n=288)	3.45602	NA	NA
TCGA-EM-A3AK-01	G1(n=288)	3.9185	NA	NA
TCGA-KS-A4I9-01	G1(n=288)	3.81651	NA	NA
TCGA-EM-A2CJ-01	G1(n=288)	4.07754	NA	NA
TCGA-CE-A484-01	G1(n=288)	4.12528	NA	NA
TCGA-ET-A25M-01	G1(n=288)	3.53554	NA	NA
TCGA-DJ-A13M-01	G1(n=288)	4.1091	NA	NA
TCGA-ET-A3BP-01	G1(n=288)	3.87387	NA	NA
TCGA-EL-A3TA-01	G1(n=288)	3.84535	NA	NA
TCGA-IM-A3U3-01	G1(n=288)	3.76079	NA	NA
TCGA-EM-A2CP-01	G1(n=288)	3.10938	NA	NA
TCGA-EM-A22L-01	G1(n=288)	4.06204	NA	NA
TCGA-DE-A4M9-01	G1(n=288)	3.91486	NA	NA
TCGA-DJ-A3UK-01	G1(n=288)	4.37098	NA	NA
TCGA-DE-A4MC-01	G1(n=288)	3.30245	NA	NA
TCGA-ET-A3BW-01	G1(n=288)	4.12866	NA	NA
TCGA-E8-A413-01	G1(n=288)	3.99547	NA	NA
TCGA-FK-A3SG-01	G1(n=288)	4.2263	NA	NA
TCGA-EM-A22M-01	G1(n=288)	3.25505	NA	NA
TCGA-EL-A3CY-01	G1(n=288)	3.664	NA	NA
TCGA-FE-A3PB-01	G1(n=288)	3.52173	NA	NA
TCGA-EM-A3AR-01	G1(n=288)	4.30028	NA	NA
TCGA-EM-A3OB-01	G1(n=288)	4.30222	NA	NA
TCGA-DJ-A3UX-01	G1(n=288)	3.97594	NA	NA
TCGA-KS-A4I1-01	G1(n=288)	4.26604	NA	NA
TCGA-EL-A3ZG-01	G1(n=288)	3.94788	NA	NA
TCGA-ET-A3DT-01	G1(n=288)	3.8406	NA	NA
TCGA-EL-A3GX-01	G1(n=288)	3.93031	NA	NA
TCGA-EM-A2OW-01	G1(n=288)	2.88908	NA	NA
TCGA-DJ-A3VE-01	G1(n=288)	4.33677	NA	NA
TCGA-BJ-A2P4-01	G1(n=288)	3.60606	NA	NA
TCGA-EM-A4FU-01	G1(n=288)	3.53978	NA	NA
TCGA-FE-A3PC-01	G1(n=288)	3.53328	NA	NA
TCGA-EM-A3SU-01	G1(n=288)	3.58183	NA	NA
TCGA-EM-A4G1-01	G1(n=288)	3.78571	NA	NA
TCGA-KS-A4IB-01	G1(n=288)	3.37908	NA	NA
TCGA-ET-A3DR-01	G1(n=288)	4.1266	NA	NA
TCGA-ET-A25N-01	G1(n=288)	3.87405	NA	NA
TCGA-CE-A3MD-01	G1(n=288)	3.97317	NA	NA
TCGA-EM-A3FN-01	G1(n=288)	3.04123	NA	NA
TCGA-DJ-A2PX-01	G1(n=288)	3.8325	NA	NA
TCGA-EM-A2P0-01	G1(n=288)	4.12141	NA	NA
TCGA-EL-A3GS-01	G1(n=288)	3.51187	NA	NA
TCGA-EM-A4FR-01	G1(n=288)	3.36087	NA	NA
TCGA-EL-A4KD-01	G1(n=288)	3.73431	NA	NA
TCGA-FE-A238-01	G1(n=288)	3.62722	NA	NA
TCGA-DJ-A3UW-01	G1(n=288)	3.43964	NA	NA
TCGA-EM-A3AQ-01	G1(n=288)	4.31003	NA	NA
TCGA-EL-A4JX-01	G1(n=288)	3.04397	NA	NA
TCGA-EL-A3D5-01	G1(n=288)	4.78014	NA	NA
TCGA-ET-A3DQ-01	G1(n=288)	3.63458	NA	NA
TCGA-FE-A3PA-01	G2(n=52)	4.27219	NA	NA
TCGA-FY-A76V-01	G2(n=52)	4.06118	NA	NA
TCGA-EM-A2CR-01	G2(n=52)	2.84788	NA	NA
TCGA-BJ-A190-01	G2(n=52)	3.7132	NA	NA
TCGA-ET-A3DV-01	G2(n=52)	3.73245	NA	NA
TCGA-DJ-A4UR-01	G2(n=52)	3.49991	NA	NA
TCGA-EM-A3AI-01	G2(n=52)	4.23317	NA	NA
TCGA-EM-A1YD-01	G2(n=52)	3.79856	NA	NA
TCGA-DJ-A2PV-01	G2(n=52)	4.35638	NA	NA
TCGA-EM-A3O6-01	G2(n=52)	3.6021	NA	NA
TCGA-EM-A3FP-01	G2(n=52)	3.46091	NA	NA
TCGA-DJ-A13P-01	G2(n=52)	4.18136	NA	NA
TCGA-EL-A4K9-01	G2(n=52)	4.24761	NA	NA
TCGA-EL-A3CL-01	G2(n=52)	4.27348	NA	NA
TCGA-EM-A3OA-01	G2(n=52)	3.6831	NA	NA
TCGA-EL-A3MW-01	G2(n=52)	4.15402	NA	NA
TCGA-DJ-A1QF-01	G2(n=52)	3.5371	NA	NA
TCGA-DJ-A2PP-01	G2(n=52)	3.81418	NA	NA
TCGA-DJ-A2PU-01	G2(n=52)	4.02008	NA	NA
TCGA-ET-A40S-01	G2(n=52)	4.37035	NA	NA
TCGA-BJ-A0ZF-01	G2(n=52)	3.94962	NA	NA
TCGA-EM-A1YA-01	G2(n=52)	2.91108	NA	NA
TCGA-DJ-A3V3-01	G2(n=52)	4.17078	NA	NA
TCGA-BJ-A0ZA-01	G2(n=52)	3.87135	NA	NA
TCGA-BJ-A0Z0-01	G2(n=52)	3.92032	NA	NA
TCGA-EL-A3H2-01	G2(n=52)	3.86559	NA	NA
TCGA-DJ-A2QC-01	G2(n=52)	4.10304	NA	NA
TCGA-EL-A3CN-01	G2(n=52)	3.2494	NA	NA
TCGA-EL-A3GY-01	G2(n=52)	4.12563	NA	NA
TCGA-E8-A432-01	G2(n=52)	4.85924	NA	NA
TCGA-EL-A3T7-01	G2(n=52)	4.48399	NA	NA
TCGA-DJ-A3VM-01	G2(n=52)	3.44037	NA	NA
TCGA-BJ-A28S-01	G2(n=52)	4.18825	NA	NA
TCGA-BJ-A4O9-01	G2(n=52)	3.93715	NA	NA
TCGA-BJ-A0YZ-01	G2(n=52)	3.07319	NA	NA
TCGA-EL-A3ZR-01	G2(n=52)	3.98373	NA	NA
TCGA-EM-A1YB-01	G2(n=52)	1.94624	NA	NA
TCGA-FY-A3W9-01	G2(n=52)	4.12231	NA	NA
TCGA-DJ-A1QL-01	G2(n=52)	3.40295	NA	NA
TCGA-DJ-A1QI-01	G2(n=52)	4.91432	NA	NA
TCGA-EL-A3N3-01	G2(n=52)	3.19697	NA	NA
TCGA-EM-A2OV-01	G2(n=52)	2.63387	NA	NA
TCGA-EL-A3T3-01	G2(n=52)	3.68966	NA	NA
TCGA-CE-A3ME-01	G2(n=52)	4.0132	NA	NA
TCGA-E3-A3E3-01	G2(n=52)	3.65013	NA	NA
TCGA-EM-A22J-01	G2(n=52)	3.05407	NA	NA
TCGA-EL-A3ZQ-01	G2(n=52)	3.25198	NA	NA
TCGA-DJ-A2Q0-01	G2(n=52)	2.82737	NA	NA
TCGA-EM-A2CO-01	G2(n=52)	2.55211	NA	NA
TCGA-EM-A2OY-01	G2(n=52)	2.73027	NA	NA
TCGA-EM-A1YE-01	G2(n=52)	3.49134	NA	NA
TCGA-ET-A4KQ-01	G2(n=52)	4.05295	NA	NA
TCGA-ET-A2N0-01	G3(n=113)	2.83679	NA	NA
TCGA-EM-A1YC-01	G3(n=113)	3.16991	NA	NA
TCGA-MK-A84Z-01	G3(n=113)	3.6661	NA	NA
TCGA-FY-A3NN-01	G3(n=113)	3.42714	NA	NA
TCGA-DJ-A1QO-01	G3(n=113)	3.21332	NA	NA
TCGA-EL-A3GV-01	G3(n=113)	4.1704	NA	NA
TCGA-BJ-A2NA-01	G3(n=113)	3.78374	NA	NA
TCGA-EL-A3CM-01	G3(n=113)	3.23964	NA	NA
TCGA-EM-A3O3-01	G3(n=113)	3.98041	NA	NA
TCGA-FY-A3TY-01	G3(n=113)	4.14865	NA	NA
TCGA-EL-A3D6-01	G3(n=113)	3.21033	NA	NA
TCGA-J8-A3YF-01	G3(n=113)	3.87598	NA	NA
TCGA-ET-A25G-01	G3(n=113)	3.03612	NA	NA
TCGA-EM-A3FR-01	G3(n=113)	4.47621	NA	NA
TCGA-BJ-A3PT-01	G3(n=113)	3.67901	NA	NA
TCGA-DJ-A2Q7-01	G3(n=113)	4.44105	NA	NA
TCGA-FK-A3SH-01	G3(n=113)	3.57709	NA	NA
TCGA-DJ-A13X-01	G3(n=113)	4.15617	NA	NA
TCGA-EL-A3CU-01	G3(n=113)	3.8317	NA	NA
TCGA-J8-A3YD-01	G3(n=113)	3.78688	NA	NA
TCGA-FY-A3YR-01	G3(n=113)	3.28033	NA	NA
TCGA-BJ-A28V-01	G3(n=113)	3.7952	NA	NA
TCGA-E8-A242-01	G3(n=113)	3.22011	NA	NA
TCGA-EL-A3CR-01	G3(n=113)	3.59994	NA	NA
TCGA-FE-A239-01	G3(n=113)	4.4166	NA	NA
TCGA-DE-A69K-01	G3(n=113)	4.15253	NA	NA
TCGA-EL-A3D0-01	G3(n=113)	3.73775	NA	NA
TCGA-EM-A2CM-01	G3(n=113)	2.91443	NA	NA
TCGA-EL-A4K1-01	G3(n=113)	2.85541	NA	NA
TCGA-DJ-A2QA-01	G3(n=113)	3.01493	NA	NA
TCGA-ET-A3BV-01	G3(n=113)	3.85361	NA	NA
TCGA-EL-A4KI-01	G3(n=113)	4.50095	NA	NA
TCGA-DJ-A3VB-01	G3(n=113)	3.7925	NA	NA
TCGA-J8-A3YG-01	G3(n=113)	3.77489	NA	NA
TCGA-EL-A3T2-01	G3(n=113)	4.14066	NA	NA
TCGA-ET-A39K-01	G3(n=113)	4.00843	NA	NA
TCGA-H2-A26U-01	G3(n=113)	3.62428	NA	NA
TCGA-BJ-A45H-01	G3(n=113)	4.30926	NA	NA
TCGA-EM-A2P2-01	G3(n=113)	3.76157	NA	NA
TCGA-EL-A4K7-01	G3(n=113)	3.83767	NA	NA
TCGA-DJ-A3V4-01	G3(n=113)	3.92882	NA	NA
TCGA-FY-A3R8-01	G3(n=113)	4.32671	NA	NA
TCGA-DJ-A3UU-01	G3(n=113)	4.07625	NA	NA
TCGA-DJ-A3UQ-01	G3(n=113)	4.10533	NA	NA
TCGA-ET-A2N4-01	G3(n=113)	3.88688	NA	NA
TCGA-J8-A42S-01	G3(n=113)	4.39983	NA	NA
TCGA-J8-A4HW-01	G3(n=113)	3.92048	NA	NA
TCGA-FK-A4UB-01	G3(n=113)	3.38126	NA	NA
TCGA-DJ-A2PW-01	G3(n=113)	4.3753	NA	NA
TCGA-EL-A3MZ-01	G3(n=113)	3.07202	NA	NA
TCGA-BJ-A45C-01	G3(n=113)	3.82897	NA	NA
TCGA-EL-A3TB-01	G3(n=113)	4.25577	NA	NA
TCGA-BJ-A45G-01	G3(n=113)	3.9492	NA	NA
TCGA-DE-A0XZ-01	G3(n=113)	4.44606	NA	NA
TCGA-BJ-A45I-01	G3(n=113)	3.82441	NA	NA
TCGA-DJ-A2PZ-01	G3(n=113)	3.31211	NA	NA
TCGA-DJ-A3V7-01	G3(n=113)	4.0216	NA	NA
TCGA-DJ-A2Q4-01	G3(n=113)	3.75359	NA	NA
TCGA-DJ-A3UR-01	G3(n=113)	4.32108	NA	NA
TCGA-DJ-A3V5-01	G3(n=113)	3.83723	NA	NA
TCGA-DJ-A1QH-01	G3(n=113)	3.7822	NA	NA
TCGA-BJ-A3PU-01	G3(n=113)	3.50269	NA	NA
TCGA-BJ-A192-01	G3(n=113)	3.42326	NA	NA
TCGA-E8-A414-01	G3(n=113)	4.2933	NA	NA
TCGA-BJ-A0Z5-01	G3(n=113)	3.33006	NA	NA
TCGA-ET-A3DW-01	G3(n=113)	3.64187	NA	NA
TCGA-EM-A22I-01	G3(n=113)	3.26667	NA	NA
TCGA-DJ-A2Q3-01	G3(n=113)	3.66736	NA	NA
TCGA-L6-A4EU-01	G3(n=113)	3.64345	NA	NA
TCGA-DJ-A3UZ-01	G3(n=113)	4.17345	NA	NA
TCGA-DJ-A2PY-01	G3(n=113)	4.09946	NA	NA
TCGA-EL-A3GP-01	G3(n=113)	3.42221	NA	NA
TCGA-EM-A3O7-01	G3(n=113)	4.46475	NA	NA
TCGA-EM-A2CU-01	G3(n=113)	4.11779	NA	NA
TCGA-ET-A4KN-01	G3(n=113)	1.43563	NA	NA
TCGA-FY-A3R7-01	G3(n=113)	4.18981	NA	NA
TCGA-DJ-A2Q2-01	G3(n=113)	3.67288	NA	NA
TCGA-DJ-A1QE-01	G3(n=113)	3.41834	NA	NA
TCGA-DJ-A13U-01	G3(n=113)	3.28051	NA	NA
TCGA-EL-A4JZ-01	G3(n=113)	4.17055	NA	NA
TCGA-J8-A4HW-06	G3(n=113)	4.15515	NA	NA
TCGA-BJ-A0ZE-01	G3(n=113)	2.6912	NA	NA
TCGA-EM-A4FH-01	G3(n=113)	4.04109	NA	NA
TCGA-EL-A3CW-01	G3(n=113)	3.71737	NA	NA
TCGA-EM-A3ST-01	G3(n=113)	3.95933	NA	NA
TCGA-BJ-A290-01	G3(n=113)	4.18576	NA	NA
TCGA-FY-A3I5-01	G3(n=113)	3.30655	NA	NA
TCGA-FY-A4B4-01	G3(n=113)	3.66537	NA	NA
TCGA-FY-A4B3-01	G3(n=113)	4.14169	NA	NA
TCGA-ET-A39P-01	G3(n=113)	3.50905	NA	NA
TCGA-DJ-A13R-01	G3(n=113)	1.80723	NA	NA
TCGA-EL-A3CO-01	G3(n=113)	3.36631	NA	NA
TCGA-KS-A4IC-01	G3(n=113)	3.95771	NA	NA
TCGA-DJ-A2PT-01	G3(n=113)	3.66635	NA	NA
TCGA-ET-A25R-01	G3(n=113)	3.62282	NA	NA
TCGA-EL-A3GU-01	G3(n=113)	3.40746	NA	NA
TCGA-DJ-A2Q9-01	G3(n=113)	3.68765	NA	NA
TCGA-J8-A3NZ-01	G3(n=113)	3.90885	NA	NA
TCGA-E3-A3DZ-01	G3(n=113)	4.22217	NA	NA
TCGA-DJ-A3VI-01	G3(n=113)	3.70127	NA	NA
TCGA-DJ-A3VK-01	G3(n=113)	4.23908	NA	NA
TCGA-BJ-A0Z9-01	G3(n=113)	3.45009	NA	NA
TCGA-EL-A3ZO-01	G3(n=113)	3.88514	NA	NA
TCGA-DE-A4M8-01	G3(n=113)	3.34088	NA	NA
TCGA-BJ-A28Z-01	G3(n=113)	3.39658	NA	NA
TCGA-EL-A3T0-01	G3(n=113)	3.82344	NA	NA
TCGA-DJ-A3V6-01	G3(n=113)	3.56493	NA	NA
TCGA-BJ-A4O8-01	G3(n=113)	4.05555	NA	NA
TCGA-DE-A4MA-01	G3(n=113)	2.81328	NA	NA
TCGA-ET-A2N5-01	G3(n=113)	3.76355	NA	NA
TCGA-ET-A39T-01	G3(n=113)	3.96551	NA	NA
TCGA-L6-A4EQ-01	G3(n=113)	4.19342	NA	NA
TCGA-FY-A3NM-01	G3(n=113)	3.92142	NA	NA
TCGA-KS-A4I5-01	G4(n=57)	4.43368	NA	NA
TCGA-EM-A4FM-01	G4(n=57)	3.45699	NA	NA
TCGA-DJ-A3V9-01	G4(n=57)	4.63089	NA	NA
TCGA-E8-A436-01	G4(n=57)	4.06757	NA	NA
TCGA-EM-A2OX-01	G4(n=57)	4.02098	NA	NA
TCGA-DE-A0Y3-01	G4(n=57)	3.45443	NA	NA
TCGA-EL-A3CT-01	G4(n=57)	3.49379	NA	NA
TCGA-EM-A22O-01	G4(n=57)	3.42649	NA	NA
TCGA-DE-A3KN-01	G4(n=57)	4.07375	NA	NA
TCGA-FE-A22Z-01	G4(n=57)	3.26746	NA	NA
TCGA-E8-A418-01	G4(n=57)	3.71604	NA	NA
TCGA-EL-A3D4-01	G4(n=57)	3.92739	NA	NA
TCGA-EM-A2CN-01	G4(n=57)	3.69604	NA	NA
TCGA-EM-A3AO-01	G4(n=57)	3.72371	NA	NA
TCGA-DJ-A4V5-01	G4(n=57)	4.2376	NA	NA
TCGA-EL-A3H5-01	G4(n=57)	2.78044	NA	NA
TCGA-EL-A3T9-01	G4(n=57)	4.83754	NA	NA
TCGA-EM-A3FM-01	G4(n=57)	2.8529	NA	NA
TCGA-QD-A8IV-01	G4(n=57)	3.77741	NA	NA
TCGA-EM-A2CS-01	G4(n=57)	4.29713	NA	NA
TCGA-EL-A3ZM-01	G4(n=57)	3.84059	NA	NA
TCGA-DJ-A3V0-01	G4(n=57)	3.36594	NA	NA
TCGA-ET-A3BT-01	G4(n=57)	4.06023	NA	NA
TCGA-J8-A4HY-01	G4(n=57)	3.41684	NA	NA
TCGA-EL-A4K6-01	G4(n=57)	3.69496	NA	NA
TCGA-EL-A3MY-01	G4(n=57)	3.84637	NA	NA
TCGA-E8-A3X7-01	G4(n=57)	3.40826	NA	NA
TCGA-BJ-A0ZB-01	G4(n=57)	3.3423	NA	NA
TCGA-EM-A4FN-01	G4(n=57)	3.58773	NA	NA
TCGA-FY-A40L-01	G4(n=57)	3.51258	NA	NA
TCGA-DJ-A3VF-01	G4(n=57)	3.59088	NA	NA
TCGA-BJ-A3EZ-01	G4(n=57)	3.58347	NA	NA
TCGA-DJ-A3UO-01	G4(n=57)	4.01639	NA	NA
TCGA-DE-A4MB-01	G4(n=57)	3.22712	NA	NA
TCGA-DE-A4MD-06	G4(n=57)	3.12176	NA	NA
TCGA-IM-A3U2-01	G4(n=57)	3.2544	NA	NA
TCGA-EM-A2CS-06	G4(n=57)	4.32722	NA	NA
TCGA-DJ-A2Q5-01	G4(n=57)	4.41073	NA	NA
TCGA-BJ-A0ZH-01	G4(n=57)	3.65172	NA	NA
TCGA-DJ-A2QB-01	G4(n=57)	3.35627	NA	NA
TCGA-DJ-A4UQ-01	G4(n=57)	4.26758	NA	NA
TCGA-BJ-A0Z2-01	G4(n=57)	4.23134	NA	NA
TCGA-ET-A25L-01	G4(n=57)	3.13906	NA	NA
TCGA-EL-A3MX-01	G4(n=57)	4.18092	NA	NA
TCGA-L6-A4ET-01	G4(n=57)	4.18364	NA	NA
TCGA-E3-A3E5-01	G4(n=57)	4.14174	NA	NA
TCGA-BJ-A18Z-01	G4(n=57)	4.06515	NA	NA
TCGA-4C-A93U-01	G4(n=57)	3.93506	NA	NA
TCGA-EL-A3CS-01	G4(n=57)	3.53826	NA	NA
TCGA-FY-A3R6-01	G4(n=57)	3.62538	NA	NA
TCGA-DO-A2HM-01	G4(n=57)	3.58645	NA	NA
TCGA-EM-A22P-01	G4(n=57)	3.91566	NA	NA
TCGA-DE-A4MD-01	G4(n=57)	3.5943	NA	NA
TCGA-EM-A22K-01	G4(n=57)	3.69966	NA	NA
TCGA-EM-A1CT-01	G4(n=57)	3.11765	NA	NA
TCGA-FE-A231-01	G4(n=57)	3.39045	NA	NA
TCGA-EL-A3H4-01	G4(n=57)	3.55259	NA	NA
TCGA-ET-A3DW-11	Normal(n=712)	3.57926	NA	NA
TCGA-EL-A3TA-11	Normal(n=712)	4.06268	NA	NA
TCGA-EL-A3T7-11	Normal(n=712)	3.96996	NA	NA
TCGA-BJ-A3PR-11	Normal(n=712)	3.05078	NA	NA
TCGA-DO-A1JZ-11	Normal(n=712)	3.62803	NA	NA
TCGA-BJ-A28W-11	Normal(n=712)	2.22259	NA	NA
TCGA-BJ-A28R-11	Normal(n=712)	3.56571	NA	NA
TCGA-KS-A41I-11	Normal(n=712)	3.65454	NA	NA
TCGA-EL-A3ZG-11	Normal(n=712)	3.74012	NA	NA
TCGA-BJ-A2N7-11	Normal(n=712)	3.96285	NA	NA
TCGA-EL-A3ZQ-11	Normal(n=712)	4.10425	NA	NA
TCGA-EM-A1CV-11	Normal(n=712)	3.98186	NA	NA
TCGA-BJ-A290-11	Normal(n=712)	3.82142	NA	NA
TCGA-EL-A3ZO-11	Normal(n=712)	3.94209	NA	NA
TCGA-EL-A3T8-11	Normal(n=712)	3.79416	NA	NA
TCGA-H2-A3RI-11	Normal(n=712)	4.23329	NA	NA
TCGA-EL-A3N2-11	Normal(n=712)	4.17907	NA	NA
TCGA-BJ-A28X-11	Normal(n=712)	3.7961	NA	NA
TCGA-EM-A1YC-11	Normal(n=712)	3.49783	NA	NA
TCGA-EL-A3MX-11	Normal(n=712)	3.68055	NA	NA
TCGA-ET-A2N5-11	Normal(n=712)	3.9182	NA	NA
TCGA-EL-A3T2-11	Normal(n=712)	4.14637	NA	NA
TCGA-GE-A2C6-11	Normal(n=712)	3.59677	NA	NA
TCGA-ET-A3DP-11	Normal(n=712)	3.91649	NA	NA
TCGA-BJ-A3PU-11	Normal(n=712)	4.21107	NA	NA
TCGA-EL-A3ZH-11	Normal(n=712)	4.0495	NA	NA
TCGA-EL-A3ZP-11	Normal(n=712)	3.89202	NA	NA
TCGA-EL-A3H2-11	Normal(n=712)	3.97862	NA	NA
TCGA-EM-A1CU-11	Normal(n=712)	4.0497	NA	NA
TCGA-EL-A3T3-11	Normal(n=712)	3.84381	NA	NA
TCGA-H2-A2K9-11	Normal(n=712)	3.63664	NA	NA
TCGA-EM-A3ST-11	Normal(n=712)	3.82044	NA	NA
TCGA-EL-A3H7-11	Normal(n=712)	3.64432	NA	NA
TCGA-EL-A3T6-11	Normal(n=712)	3.63056	NA	NA
TCGA-EL-A3MY-11	Normal(n=712)	3.79797	NA	NA
TCGA-EL-A3TB-11	Normal(n=712)	4.04083	NA	NA
TCGA-FY-A3TY-11	Normal(n=712)	4.1489	NA	NA
TCGA-EL-A3T0-11	Normal(n=712)	3.61556	NA	NA
TCGA-BJ-A2N8-11	Normal(n=712)	3.79693	NA	NA
TCGA-BJ-A2NA-11	Normal(n=712)	3.45483	NA	NA
TCGA-EM-A1CS-11	Normal(n=712)	3.77506	NA	NA
TCGA-EL-A3ZR-11	Normal(n=712)	4.06667	NA	NA
TCGA-EL-A3ZS-11	Normal(n=712)	3.27048	NA	NA
TCGA-EM-A1CW-11	Normal(n=712)	4.33376	NA	NA
TCGA-ET-A2MX-11	Normal(n=712)	4.21714	NA	NA
TCGA-EL-A3ZT-11	Normal(n=712)	3.86862	NA	NA
TCGA-KS-A41L-11	Normal(n=712)	4.16271	NA	NA
TCGA-KS-A41J-11	Normal(n=712)	4.03118	NA	NA
TCGA-EM-A1CT-11	Normal(n=712)	3.74839	NA	NA
TCGA-E8-A2JQ-11	Normal(n=712)	3.78841	NA	NA
TCGA-EL-A3N3-11	Normal(n=712)	3.96064	NA	NA
TCGA-EL-A3H1-11	Normal(n=712)	3.60715	NA	NA
TCGA-EL-A3T1-11	Normal(n=712)	3.78736	NA	NA
TCGA-EL-A3MW-11	Normal(n=712)	4.10393	NA	NA
TCGA-EL-A3ZM-11	Normal(n=712)	3.83062	NA	NA
TCGA-BJ-A2N9-11	Normal(n=712)	3.49974	NA	NA
TCGA-EL-A3ZL-11	Normal(n=712)	4.06478	NA	NA
TCGA-EL-A3GZ-11	Normal(n=712)	4.03528	NA	NA
TCGA-EL-A3ZK-11	Normal(n=712)	3.73414	NA	NA
GTEX-111CU-0226-SM-5GZXC	Normal(n=712)	3.33528	NA	NA
GTEX-111FC-1026-SM-5GZX1	Normal(n=712)	3.72901	NA	NA
GTEX-111VG-0526-SM-5N9BW	Normal(n=712)	3.29558	NA	NA
GTEX-111YS-0726-SM-5GZY8	Normal(n=712)	3.22095	NA	NA
GTEX-1122O-0226-SM-5N9DA	Normal(n=712)	3.06781	NA	NA
GTEX-1128S-0126-SM-5H12S	Normal(n=712)	3.5097	NA	NA
GTEX-113JC-0126-SM-5EGJW	Normal(n=712)	3.22435	NA	NA
GTEX-117XS-0526-SM-5987Q	Normal(n=712)	3.13701	NA	NA
GTEX-117YW-0126-SM-5EGGN	Normal(n=712)	3.45943	NA	NA
GTEX-117YX-1226-SM-5H11S	Normal(n=712)	3.40762	NA	NA
GTEX-1192W-0126-SM-5EGGS	Normal(n=712)	3.774	NA	NA
GTEX-1192X-1126-SM-5EGGU	Normal(n=712)	3.59694	NA	NA
GTEX-11DXX-0226-SM-5P9HL	Normal(n=712)	3.15688	NA	NA
GTEX-11DXY-0426-SM-5H12R	Normal(n=712)	3.46074	NA	NA
GTEX-11DXZ-0926-SM-5N9CG	Normal(n=712)	3.55336	NA	NA
GTEX-11DYG-0826-SM-5N9GH	Normal(n=712)	3.85699	NA	NA
GTEX-11DZ1-2726-SM-5A5KH	Normal(n=712)	3.50843	NA	NA
GTEX-11EI6-0726-SM-59866	Normal(n=712)	3.488	NA	NA
GTEX-11EM3-0126-SM-5985K	Normal(n=712)	3.12201	NA	NA
GTEX-11EMC-0226-SM-5EGLP	Normal(n=712)	3.26409	NA	NA
GTEX-11EQ8-0826-SM-5N9FG	Normal(n=712)	4.22728	NA	NA
GTEX-11EQ9-0626-SM-5A5K1	Normal(n=712)	3.39602	NA	NA
GTEX-11GS4-0826-SM-5986J	Normal(n=712)	3.26589	NA	NA
GTEX-11GSO-0626-SM-5A5LW	Normal(n=712)	3.488	NA	NA
GTEX-11GSP-0126-SM-5A5KU	Normal(n=712)	2.89317	NA	NA
GTEX-11I78-0526-SM-5986A	Normal(n=712)	3.14617	NA	NA
GTEX-11LCK-0526-SM-5A5M9	Normal(n=712)	3.47508	NA	NA
GTEX-11NSD-0126-SM-5987F	Normal(n=712)	3.8846	NA	NA
GTEX-11NUK-1026-SM-5HL5J	Normal(n=712)	3.46989	NA	NA
GTEX-11NV4-0626-SM-5N9BR	Normal(n=712)	3.67016	NA	NA
GTEX-11O72-2326-SM-5BC7H	Normal(n=712)	3.3529	NA	NA
GTEX-11OF3-0626-SM-5BC4Y	Normal(n=712)	3.96162	NA	NA
GTEX-11P7K-0226-SM-5986Z	Normal(n=712)	3.39259	NA	NA
GTEX-11P81-0126-SM-5HL5Y	Normal(n=712)	3.84499	NA	NA
GTEX-11P82-0226-SM-5HL4O	Normal(n=712)	3.16511	NA	NA
GTEX-11TT1-1126-SM-5P9GV	Normal(n=712)	3.3488	NA	NA
GTEX-11TTK-0826-SM-5N9EG	Normal(n=712)	3.32366	NA	NA
GTEX-11TUW-0226-SM-5LU8X	Normal(n=712)	3.49442	NA	NA
GTEX-11UD2-0626-SM-5GU6L	Normal(n=712)	3.97911	NA	NA
GTEX-11VI4-0226-SM-5GU6C	Normal(n=712)	3.23649	NA	NA
GTEX-11XUK-0226-SM-5EQLW	Normal(n=712)	3.27158	NA	NA
GTEX-11ZTS-1126-SM-5LU9X	Normal(n=712)	2.91514	NA	NA
GTEX-11ZTT-1026-SM-5EQKF	Normal(n=712)	3.29734	NA	NA
GTEX-11ZVC-0126-SM-5986G	Normal(n=712)	3.54473	NA	NA
GTEX-1211K-0726-SM-5FQUW	Normal(n=712)	3.25942	NA	NA
GTEX-1212Z-0426-SM-5FQT6	Normal(n=712)	3.30655	NA	NA
GTEX-12584-0826-SM-5FQSK	Normal(n=712)	3.74308	NA	NA
GTEX-12696-0326-SM-5EGL4	Normal(n=712)	3.63227	NA	NA
GTEX-1269C-0226-SM-5EGKS	Normal(n=712)	3.00971	NA	NA
GTEX-12BJ1-0426-SM-5FQSO	Normal(n=712)	3.19692	NA	NA
GTEX-12WSC-0826-SM-5EQ5Q	Normal(n=712)	3.42694	NA	NA
GTEX-12WSD-0926-SM-5GCNL	Normal(n=712)	3.63459	NA	NA
GTEX-12WSE-1226-SM-73KUF	Normal(n=712)	3.60644	NA	NA
GTEX-12WSG-0226-SM-5EGIF	Normal(n=712)	3.18253	NA	NA
GTEX-12WSH-0226-SM-5GCOG	Normal(n=712)	3.48285	NA	NA
GTEX-12WSJ-0326-SM-5GCMT	Normal(n=712)	3.18206	NA	NA
GTEX-12WSK-0926-SM-5CVNQ	Normal(n=712)	3.52607	NA	NA
GTEX-12WSL-0626-SM-5GCOY	Normal(n=712)	3.72901	NA	NA
GTEX-12WSN-0726-SM-5GCMS	Normal(n=712)	3.42492	NA	NA
GTEX-12ZZX-1226-SM-5EGHS	Normal(n=712)	3.46989	NA	NA
GTEX-12ZZY-0826-SM-5EQMT	Normal(n=712)	3.58135	NA	NA
GTEX-12ZZZ-1226-SM-59HK1	Normal(n=712)	3.49442	NA	NA
GTEX-13111-0226-SM-5EQ55	Normal(n=712)	3.30334	NA	NA
GTEX-13112-0326-SM-5P9IW	Normal(n=712)	3.60881	NA	NA
GTEX-13113-0126-SM-5LZVX	Normal(n=712)	3.55336	NA	NA
GTEX-1313W-0726-SM-5EGK1	Normal(n=712)	3.60407	NA	NA
GTEX-131XE-0126-SM-5LZVC	Normal(n=712)	3.51854	NA	NA
GTEX-131XF-1826-SM-5EGKG	Normal(n=712)	3.26918	NA	NA
GTEX-131XG-0226-SM-5IFG1	Normal(n=712)	3.17073	NA	NA
GTEX-131XH-0526-SM-5DUX7	Normal(n=712)	3.58015	NA	NA
GTEX-131YS-0726-SM-5P9G9	Normal(n=712)	3.56682	NA	NA
GTEX-132AR-1126-SM-5P9GA	Normal(n=712)	3.86196	NA	NA
GTEX-132NY-1026-SM-5P9IY	Normal(n=712)	3.54844	NA	NA
GTEX-132QS-0326-SM-5IJFN	Normal(n=712)	3.01988	NA	NA
GTEX-133LE-0326-SM-5P9G4	Normal(n=712)	3.31817	NA	NA
GTEX-1399R-0126-SM-5IFEV	Normal(n=712)	3.58256	NA	NA
GTEX-1399T-0126-SM-5KM15	Normal(n=712)	3.36807	NA	NA
GTEX-1399U-0326-SM-5P9G5	Normal(n=712)	3.38114	NA	NA
GTEX-139T6-0326-SM-5J2LY	Normal(n=712)	3.27888	NA	NA
GTEX-139TS-0126-SM-5K7XJ	Normal(n=712)	3.52732	NA	NA
GTEX-139UW-0126-SM-5KM1B	Normal(n=712)	2.86532	NA	NA
GTEX-139YR-1226-SM-5IFEU	Normal(n=712)	3.64155	NA	NA
GTEX-13CF3-0926-SM-5LZZC	Normal(n=712)	3.04562	NA	NA
GTEX-13D11-0226-SM-5LZXL	Normal(n=712)	3.1152	NA	NA
GTEX-13FH7-0126-SM-5KLZ1	Normal(n=712)	3.33142	NA	NA
GTEX-13FHO-0926-SM-5N9EW	Normal(n=712)	3.50589	NA	NA
GTEX-13FHP-0926-SM-5L3EC	Normal(n=712)	3.73227	NA	NA
GTEX-13FLV-0226-SM-5J2OF	Normal(n=712)	3.13652	NA	NA
GTEX-13FLW-0326-SM-5J2M4	Normal(n=712)	3.60288	NA	NA
GTEX-13FTW-0626-SM-5IFEX	Normal(n=712)	3.27262	NA	NA
GTEX-13FTY-0726-SM-5J2OH	Normal(n=712)	3.71809	NA	NA
GTEX-13FXS-0726-SM-5LZXJ	Normal(n=712)	3.32912	NA	NA
GTEX-13G51-1226-SM-5K7Z3	Normal(n=712)	3.39602	NA	NA
GTEX-13IVO-0926-SM-5KLZP	Normal(n=712)	4.41684	NA	NA
GTEX-13JVG-0926-SM-5IJE1	Normal(n=712)	3.50589	NA	NA
GTEX-13N11-1026-SM-5K7XQ	Normal(n=712)	3.92505	NA	NA
GTEX-13N1W-0826-SM-5MR5J	Normal(n=712)	3.45497	NA	NA
GTEX-13N2G-0726-SM-5MR38	Normal(n=712)	3.53854	NA	NA
GTEX-13NYB-0726-SM-5MR4J	Normal(n=712)	3.46858	NA	NA
GTEX-13NYC-2426-SM-5MR3K	Normal(n=712)	3.56071	NA	NA
GTEX-13NZ8-0226-SM-5J2OK	Normal(n=712)	4.16511	NA	NA
GTEX-13NZ9-1126-SM-5MR37	Normal(n=712)	3.77716	NA	NA
GTEX-13NZA-1026-SM-5MR48	Normal(n=712)	3.26529	NA	NA
GTEX-13O1R-0826-SM-5J2MB	Normal(n=712)	3.5435	NA	NA
GTEX-13O21-2226-SM-5MR3L	Normal(n=712)	3.39862	NA	NA
GTEX-13O3O-0926-SM-5KM1F	Normal(n=712)	3.40531	NA	NA
GTEX-13O3P-0726-SM-5J2OM	Normal(n=712)	3.81558	NA	NA
GTEX-13O3Q-0626-SM-5IJG1	Normal(n=712)	3.47249	NA	NA
GTEX-13O61-0226-SM-5KM52	Normal(n=712)	3.28125	NA	NA
GTEX-13OVG-0226-SM-5LU93	Normal(n=712)	3.53854	NA	NA
GTEX-13OVI-0826-SM-5KLZ8	Normal(n=712)	3.29425	NA	NA
GTEX-13OVJ-0626-SM-5J2O2	Normal(n=712)	2.99404	NA	NA
GTEX-13OVK-0226-SM-6M472	Normal(n=712)	3.86888	NA	NA
GTEX-13OW5-0626-SM-5J2N2	Normal(n=712)	3.53605	NA	NA
GTEX-13OW6-0726-SM-5L3FX	Normal(n=712)	3.64731	NA	NA
GTEX-13OW7-0826-SM-5L3EL	Normal(n=712)	3.36331	NA	NA
GTEX-13OW8-0126-SM-5IJE5	Normal(n=712)	3.33414	NA	NA
GTEX-13PDP-1026-SM-5L3FA	Normal(n=712)	4.32048	NA	NA
GTEX-13PL6-1026-SM-5L3E5	Normal(n=712)	3.6893	NA	NA
GTEX-13PVQ-0726-SM-5L3GI	Normal(n=712)	3.39958	NA	NA
GTEX-13PVR-0626-SM-5S2RC	Normal(n=712)	3.06747	NA	NA
GTEX-13QBU-0626-SM-5J2OG	Normal(n=712)	3.28659	NA	NA
GTEX-13QJ3-0926-SM-73KX5	Normal(n=712)	3.51349	NA	NA
GTEX-13QJC-0826-SM-5RQKC	Normal(n=712)	3.43269	NA	NA
GTEX-13RTJ-0326-SM-5YYAE	Normal(n=712)	3.32452	NA	NA
GTEX-13RTK-0326-SM-5RQHS	Normal(n=712)	3.23051	NA	NA
GTEX-13S86-1126-SM-5RQJX	Normal(n=712)	3.27516	NA	NA
GTEX-13U4I-0526-SM-5LU59	Normal(n=712)	3.66448	NA	NA
GTEX-13VXT-0626-SM-5SIA1	Normal(n=712)	3.64962	NA	NA
GTEX-13VXU-0826-SM-5KLZ2	Normal(n=712)	3.50716	NA	NA
GTEX-13W46-0926-SM-5LU3T	Normal(n=712)	4.01346	NA	NA
GTEX-13X6H-0526-SM-5LU4Q	Normal(n=712)	3.36737	NA	NA
GTEX-13X6J-0826-SM-5LU32	Normal(n=712)	3.5472	NA	NA
GTEX-13YAN-0926-SM-5O9C3	Normal(n=712)	3.70819	NA	NA
GTEX-144GL-1226-SM-5O9A4	Normal(n=712)	3.30247	NA	NA
GTEX-144GM-0226-SM-5Q5CB	Normal(n=712)	3.2032	NA	NA
GTEX-144GO-0126-SM-5LUAO	Normal(n=712)	3.23419	NA	NA
GTEX-145LT-0226-SM-5S2QK	Normal(n=712)	3.20383	NA	NA
GTEX-145LU-0426-SM-5O9AH	Normal(n=712)	3.32769	NA	NA
GTEX-145ME-0126-SM-5S2QM	Normal(n=712)	3.65421	NA	NA
GTEX-145MG-0826-SM-5Q5C2	Normal(n=712)	3.78555	NA	NA
GTEX-145MH-0426-SM-5LU8T	Normal(n=712)	3.62761	NA	NA
GTEX-145MI-1126-SM-5O9AK	Normal(n=712)	4.33056	NA	NA
GTEX-146FQ-0726-SM-5LUA7	Normal(n=712)	3.63691	NA	NA
GTEX-146FR-0326-SM-5SI8U	Normal(n=712)	3.35431	NA	NA
GTEX-14753-0926-SM-5Q5BI	Normal(n=712)	3.27038	NA	NA
GTEX-1477Z-0226-SM-5TDCI	Normal(n=712)	3.86987	NA	NA
GTEX-147F4-0826-SM-5QGRB	Normal(n=712)	3.4593	NA	NA
GTEX-147GR-0726-SM-5S2PL	Normal(n=712)	3.37407	NA	NA
GTEX-148VI-0526-SM-5TDDG	Normal(n=712)	3.67582	NA	NA
GTEX-148VJ-0726-SM-5LU8J	Normal(n=712)	3.47897	NA	NA
GTEX-1497J-0126-SM-5Q5BK	Normal(n=712)	3.59455	NA	NA
GTEX-14A5H-0726-SM-5Q5DW	Normal(n=712)	3.68482	NA	NA
GTEX-14A6H-2426-SM-5Q5BO	Normal(n=712)	3.69042	NA	NA
GTEX-14ABY-0926-SM-5Q5DY	Normal(n=712)	3.88069	NA	NA
GTEX-14AS3-0226-SM-5Q5B6	Normal(n=712)	3.89239	NA	NA
GTEX-14ASI-0726-SM-5Q5DC	Normal(n=712)	3.64731	NA	NA
GTEX-14B4R-0126-SM-5TDE4	Normal(n=712)	3.44294	NA	NA
GTEX-14BIN-0126-SM-5TDCG	Normal(n=712)	3.47379	NA	NA
GTEX-14BMU-0226-SM-5S2QA	Normal(n=712)	3.24565	NA	NA
GTEX-14BMV-0726-SM-73KVE	Normal(n=712)	3.27813	NA	NA
GTEX-14C38-0826-SM-5S2U8	Normal(n=712)	3.51096	NA	NA
GTEX-14C39-0226-SM-5TDDW	Normal(n=712)	3.63807	NA	NA
GTEX-14C5O-0826-SM-5TDEG	Normal(n=712)	3.84499	NA	NA
GTEX-14DAQ-0826-SM-73KWT	Normal(n=712)	3.71809	NA	NA
GTEX-14E6C-2626-SM-5RQJP	Normal(n=712)	3.60881	NA	NA
GTEX-14E6E-0326-SM-73KY6	Normal(n=712)	3.09963	NA	NA
GTEX-14E7W-0926-SM-5YYA4	Normal(n=712)	3.42344	NA	NA
GTEX-14ICK-1626-SM-6ETZX	Normal(n=712)	3.17393	NA	NA
GTEX-14ICL-0426-SM-5RQJ3	Normal(n=712)	3.15818	NA	NA
GTEX-14JG6-1326-SM-9OSXU	Normal(n=712)	3.36135	NA	NA
GTEX-14JIY-1226-SM-6871R	Normal(n=712)	3.22033	NA	NA
GTEX-14PHW-2926-SM-6AJBA	Normal(n=712)	3.8268	NA	NA
GTEX-14PII-0826-SM-6871S	Normal(n=712)	3.62877	NA	NA
GTEX-14PJ3-0126-SM-69LQP	Normal(n=712)	3.17281	NA	NA
GTEX-14PJ4-0326-SM-664OT	Normal(n=712)	3.34823	NA	NA
GTEX-14PJ6-0326-SM-6871H	Normal(n=712)	2.65329	NA	NA
GTEX-14PJM-1326-SM-664NX	Normal(n=712)	3.20085	NA	NA
GTEX-14PJO-0626-SM-6LLHH	Normal(n=712)	3.63343	NA	NA
GTEX-14PK6-0426-SM-6EU1J	Normal(n=712)	3.31034	NA	NA
GTEX-14PKU-0326-SM-6AJA7	Normal(n=712)	3.32812	NA	NA
GTEX-14PKV-0626-SM-6AJA2	Normal(n=712)	3.17776	NA	NA
GTEX-14PN3-0826-SM-69LOS	Normal(n=712)	3.03245	NA	NA
GTEX-14PN4-1526-SM-6871V	Normal(n=712)	3.44626	NA	NA
GTEX-14PQA-1226-SM-6M47A	Normal(n=712)	3.62059	NA	NA
GTEX-14XAO-0426-SM-6AJB6	Normal(n=712)	3.25867	NA	NA
GTEX-15CHC-0126-SM-5YYBA	Normal(n=712)	3.20242	NA	NA
GTEX-15CHQ-0826-SM-69LOT	Normal(n=712)	3.68706	NA	NA
GTEX-15CHR-1726-SM-7DUGW	Normal(n=712)	3.73118	NA	NA
GTEX-15D1Q-0626-SM-6AJAZ	Normal(n=712)	3.74308	NA	NA
GTEX-15DDE-0626-SM-69LOK	Normal(n=712)	4.41684	NA	NA
GTEX-15DZA-0226-SM-7KFS6	Normal(n=712)	3.41913	NA	NA
GTEX-15EO6-0126-SM-6LPKJ	Normal(n=712)	3.6241	NA	NA
GTEX-15ER7-0726-SM-7KUMF	Normal(n=712)	3.37337	NA	NA
GTEX-15ETS-0526-SM-6PAN3	Normal(n=712)	3.39204	NA	NA
GTEX-15EU6-1426-SM-6M48E	Normal(n=712)	3.50716	NA	NA
GTEX-15FZZ-0226-SM-6LLI4	Normal(n=712)	2.87027	NA	NA
GTEX-15G19-0626-SM-6M474	Normal(n=712)	3.38874	NA	NA
GTEX-15G1A-0326-SM-6M467	Normal(n=712)	3.23603	NA	NA
GTEX-15RIE-0426-SM-7KUMH	Normal(n=712)	3.59813	NA	NA
GTEX-15RIF-0326-SM-7KUFR	Normal(n=712)	2.94523	NA	NA
GTEX-15RJ7-0326-SM-6M47H	Normal(n=712)	3.18412	NA	NA
GTEX-15RJE-1326-SM-6LPI6	Normal(n=712)	3.36107	NA	NA
GTEX-15SB6-1526-SM-7KUMQ	Normal(n=712)	3.62761	NA	NA
GTEX-15SHU-0726-SM-7KUFI	Normal(n=712)	3.72465	NA	NA
GTEX-15SHV-0426-SM-6M476	Normal(n=712)	3.43469	NA	NA
GTEX-15UF6-1126-SM-6LPJ3	Normal(n=712)	3.60644	NA	NA
GTEX-169BO-0326-SM-7EPIM	Normal(n=712)	3.30115	NA	NA
GTEX-16AAH-0326-SM-7DHML	Normal(n=712)	3.13142	NA	NA
GTEX-16BQI-0726-SM-6LPJZ	Normal(n=712)	3.37156	NA	NA
GTEX-16GPK-0926-SM-6LPJ9	Normal(n=712)	3.12416	NA	NA
GTEX-16MT8-0626-SM-6M47Q	Normal(n=712)	3.70819	NA	NA
GTEX-16MTA-0726-SM-7KUL4	Normal(n=712)	3.36695	NA	NA
GTEX-16NGA-0326-SM-718AJ	Normal(n=712)	3.41197	NA	NA
GTEX-16NPX-1426-SM-6LPK3	Normal(n=712)	3.52857	NA	NA
GTEX-16XZY-0726-SM-79OMU	Normal(n=712)	3.25701	NA	NA
GTEX-16XZZ-0826-SM-7IGM3	Normal(n=712)	3.67356	NA	NA
GTEX-16YQH-0326-SM-6LPJV	Normal(n=712)	2.92182	NA	NA
GTEX-16Z82-0426-SM-7EPGX	Normal(n=712)	3.28437	NA	NA
GTEX-178AV-0726-SM-6LPJI	Normal(n=712)	3.30217	NA	NA
GTEX-17EVP-0126-SM-7EPHW	Normal(n=712)	3.36443	NA	NA
GTEX-17EVQ-0526-SM-7KFSK	Normal(n=712)	3.46989	NA	NA
GTEX-17F96-0526-SM-79OLE	Normal(n=712)	3.53978	NA	NA
GTEX-17F97-0626-SM-7IGOH	Normal(n=712)	3.40067	NA	NA
GTEX-17F9E-0626-SM-79ON5	Normal(n=712)	3.20867	NA	NA
GTEX-17F9Y-0526-SM-7EWDC	Normal(n=712)	3.71589	NA	NA
GTEX-17GQL-0226-SM-7LTAK	Normal(n=712)	3.36107	NA	NA
GTEX-17HG3-0226-SM-7EWEA	Normal(n=712)	3.38488	NA	NA
GTEX-17HGU-0826-SM-7EWE5	Normal(n=712)	3.48156	NA	NA
GTEX-17HHE-0426-SM-79OK3	Normal(n=712)	3.82273	NA	NA
GTEX-17HHY-0826-SM-7EPID	Normal(n=712)	3.18903	NA	NA
GTEX-17HII-1926-SM-79OLB	Normal(n=712)	3.37351	NA	NA
GTEX-17JCI-0626-SM-7IGM7	Normal(n=712)	3.1429	NA	NA
GTEX-17KNJ-1026-SM-79ONK	Normal(n=712)	3.50716	NA	NA
GTEX-17MF6-0626-SM-7LT8D	Normal(n=712)	3.4485	NA	NA
GTEX-183FY-0626-SM-79OKR	Normal(n=712)	3.86691	NA	NA
GTEX-183WM-2626-SM-7KFRY	Normal(n=712)	3.53356	NA	NA
GTEX-18465-1426-SM-7KFTF	Normal(n=712)	3.6837	NA	NA
GTEX-18A66-0826-SM-72D5Z	Normal(n=712)	3.7366	NA	NA
GTEX-18A67-0826-SM-7KFTI	Normal(n=712)	3.44679	NA	NA
GTEX-18A6Q-0726-SM-7LT8Y	Normal(n=712)	2.82762	NA	NA
GTEX-18A7A-0826-SM-7KFTJ	Normal(n=712)	3.40381	NA	NA
GTEX-18D9A-0126-SM-7KFSI	Normal(n=712)	3.58736	NA	NA
GTEX-18D9B-0726-SM-72D6K	Normal(n=712)	3.01721	NA	NA
GTEX-18D9U-1026-SM-72D5R	Normal(n=712)	3.46728	NA	NA
GTEX-18QFQ-0726-SM-7LG6D	Normal(n=712)	3.47379	NA	NA
GTEX-1A3MV-0326-SM-73KW7	Normal(n=712)	3.24823	NA	NA
GTEX-1A8FM-0726-SM-7DUGK	Normal(n=712)	3.53481	NA	NA
GTEX-1A8G6-0626-SM-7IGNB	Normal(n=712)	3.21117	NA	NA
GTEX-1A8G7-1026-SM-73KVA	Normal(n=712)	3.64962	NA	NA
GTEX-1AMEY-0126-SM-73KTX	Normal(n=712)	2.9013	NA	NA
GTEX-1AMFI-0526-SM-7189M	Normal(n=712)	3.63343	NA	NA
GTEX-1AX8Z-0826-SM-7DUFZ	Normal(n=712)	3.50589	NA	NA
GTEX-1AX9I-0626-SM-72D54	Normal(n=712)	3.59694	NA	NA
GTEX-1AX9J-2126-SM-731DD	Normal(n=712)	3.00432	NA	NA
GTEX-1AX9K-0626-SM-73KVD	Normal(n=712)	3.56925	NA	NA
GTEX-1AYCT-0226-SM-73KVB	Normal(n=712)	3.43909	NA	NA
GTEX-1B8KE-0626-SM-7189H	Normal(n=712)	3.03598	NA	NA
GTEX-1B8KZ-0426-SM-731DP	Normal(n=712)	3.60763	NA	NA
GTEX-1B8L1-1626-SM-7IGMH	Normal(n=712)	3.49057	NA	NA
GTEX-1B8SF-0626-SM-73KVV	Normal(n=712)	3.38267	NA	NA
GTEX-1B8SG-1126-SM-7IGMT	Normal(n=712)	3.38957	NA	NA
GTEX-1B932-0926-SM-73KUP	Normal(n=712)	3.68594	NA	NA
GTEX-1B933-1026-SM-7P8RO	Normal(n=712)	3.58015	NA	NA
GTEX-1B97I-0326-SM-7DUGB	Normal(n=712)	3.30568	NA	NA
GTEX-1B97J-0626-SM-7P8RU	Normal(n=712)	3.50208	NA	NA
GTEX-1BAJH-0926-SM-79OO6	Normal(n=712)	2.88557	NA	NA
GTEX-1C2JI-0326-SM-7EWFD	Normal(n=712)	2.62621	NA	NA
GTEX-1C475-0226-SM-7MGXM	Normal(n=712)	2.60098	NA	NA
GTEX-1C4CL-0726-SM-7IGP9	Normal(n=712)	3.67694	NA	NA
GTEX-1C64N-1026-SM-79ONM	Normal(n=712)	3.60407	NA	NA
GTEX-1C6VQ-0526-SM-7MGWD	Normal(n=712)	3.05745	NA	NA
GTEX-1C6VR-0426-SM-7IGN6	Normal(n=712)	3.35007	NA	NA
GTEX-1C6VS-0826-SM-7EWEI	Normal(n=712)	3.6241	NA	NA
GTEX-1CAMQ-1126-SM-7EWFE	Normal(n=712)	3.22296	NA	NA
GTEX-1CAMR-0226-SM-7DUGO	Normal(n=712)	3.40231	NA	NA
GTEX-1CAMS-0826-SM-7P8P1	Normal(n=712)	3.45838	NA	NA
GTEX-1CB4E-0326-SM-7MXT3	Normal(n=712)	3.03263	NA	NA
GTEX-1CB4F-0826-SM-793CV	Normal(n=712)	3.69488	NA	NA
GTEX-1CB4G-1526-SM-7P8QG	Normal(n=712)	3.21257	NA	NA
GTEX-1CB4H-0126-SM-7IGN2	Normal(n=712)	3.61589	NA	NA
GTEX-1CB4I-0726-SM-7DUGS	Normal(n=712)	3.3952	NA	NA
GTEX-1CB4J-1426-SM-7MKFR	Normal(n=712)	3.27456	NA	NA
GTEX-1E1VI-0726-SM-7P8QJ	Normal(n=712)	2.90323	NA	NA
GTEX-1EH9U-0926-SM-7EWF1	Normal(n=712)	3.40163	NA	NA
GTEX-1EKGG-0726-SM-7IGPX	Normal(n=712)	3.10434	NA	NA
GTEX-1EMGI-0826-SM-7EPHY	Normal(n=712)	3.25172	NA	NA
GTEX-1EN7A-1026-SM-7IGPZ	Normal(n=712)	3.488	NA	NA
GTEX-1EU9M-0626-SM-7MXUT	Normal(n=712)	3.06333	NA	NA
GTEX-1EWIQ-0826-SM-7MXTH	Normal(n=712)	3.6837	NA	NA
GTEX-1EX96-0126-SM-9KNVH	Normal(n=712)	3.53854	NA	NA
GTEX-1F48J-0926-SM-7P8PZ	Normal(n=712)	3.39726	NA	NA
GTEX-1F52S-0526-SM-7P8TP	Normal(n=712)	3.85699	NA	NA
GTEX-1F5PL-0826-SM-7MXU7	Normal(n=712)	3.10786	NA	NA
GTEX-1F6IF-1126-SM-9KNV2	Normal(n=712)	3.10735	NA	NA
GTEX-1F75A-0326-SM-7MXTR	Normal(n=712)	3.72792	NA	NA
GTEX-1F75B-0826-SM-9QEIT	Normal(n=712)	3.53978	NA	NA
GTEX-1F75I-0926-SM-7MXUU	Normal(n=712)	3.44996	NA	NA
GTEX-1F88F-0726-SM-7P8R7	Normal(n=712)	2.81844	NA	NA
GTEX-1FIGZ-0226-SM-7P8QR	Normal(n=712)	3.4355	NA	NA
GTEX-1GF9U-0226-SM-7P8TY	Normal(n=712)	3.69933	NA	NA
GTEX-1GF9V-0926-SM-9KNW7	Normal(n=712)	3.35741	NA	NA
GTEX-1GF9W-0626-SM-7MXVJ	Normal(n=712)	3.37058	NA	NA
GTEX-1GF9X-0126-SM-A9G38	Normal(n=712)	3.72247	NA	NA
GTEX-1GL5R-0626-SM-7PBZY	Normal(n=712)	3.61471	NA	NA
GTEX-1GMR3-0726-SM-9WPOF	Normal(n=712)	3.60526	NA	NA
GTEX-1GMR8-0826-SM-9KNUR	Normal(n=712)	3.73118	NA	NA
GTEX-1GMRU-1126-SM-9KNV1	Normal(n=712)	3.63343	NA	NA
GTEX-1GN1U-0826-SM-9WPPX	Normal(n=712)	4.0027	NA	NA
GTEX-1GN1V-0626-SM-7P8QU	Normal(n=712)	3.3591	NA	NA
GTEX-1GN1W-0126-SM-7MXV7	Normal(n=712)	3.30247	NA	NA
GTEX-1GN2E-0826-SM-9WYT8	Normal(n=712)	3.13356	NA	NA
GTEX-1GN73-0826-SM-9OSW4	Normal(n=712)	3.00576	NA	NA
GTEX-1GPI7-0726-SM-9WG84	Normal(n=712)	3.42613	NA	NA
GTEX-1GTWX-0726-SM-9WPPA	Normal(n=712)	3.40871	NA	NA
GTEX-1GZ2Q-0826-SM-7P8TK	Normal(n=712)	3.57894	NA	NA
GTEX-1GZ4H-0226-SM-9JGGJ	Normal(n=712)	2.24793	NA	NA
GTEX-1GZ4I-0626-SM-9WPPN	Normal(n=712)	3.4526	NA	NA
GTEX-1GZHY-1426-SM-9WG5H	Normal(n=712)	3.57289	NA	NA
GTEX-1H11D-0626-SM-9WPQ1	Normal(n=712)	3.68145	NA	NA
GTEX-1H1CY-0726-SM-9OSXX	Normal(n=712)	3.30597	NA	NA
GTEX-1H1DE-0226-SM-ARZN8	Normal(n=712)	3.39506	NA	NA
GTEX-1H1DF-1026-SM-9QEJ1	Normal(n=712)	3.51475	NA	NA
GTEX-1H1DG-0726-SM-A96TN	Normal(n=712)	3.53232	NA	NA
GTEX-1H1E6-0326-SM-9OSWE	Normal(n=712)	3.44414	NA	NA
GTEX-1H1ZS-0726-SM-A9G3K	Normal(n=712)	3.28954	NA	NA
GTEX-1H2FU-0626-SM-9WPPS	Normal(n=712)	3.37587	NA	NA
GTEX-1H3VE-0826-SM-9KNVQ	Normal(n=712)	3.50589	NA	NA
GTEX-1HB9E-0826-SM-CNNQJ	Normal(n=712)	3.20054	NA	NA
GTEX-1HBPH-0926-SM-A9SME	Normal(n=712)	3.44241	NA	NA
GTEX-1HBPI-0826-SM-9WYTX	Normal(n=712)	3.26529	NA	NA
GTEX-1HBPM-0926-SM-ARL9C	Normal(n=712)	3.46597	NA	NA
GTEX-1HBPN-1226-SM-B2LW9	Normal(n=712)	2.8526	NA	NA
GTEX-1HC8U-1226-SM-9WYUW	Normal(n=712)	3.49057	NA	NA
GTEX-1HCU7-0826-SM-B2LX7	Normal(n=712)	3.82069	NA	NA
GTEX-1HCU9-0226-SM-9WPNT	Normal(n=712)	3.59335	NA	NA
GTEX-1HCUA-0126-SM-B2LWC	Normal(n=712)	3.56803	NA	NA
GTEX-1HCVE-0726-SM-A96SH	Normal(n=712)	3.21925	NA	NA
GTEX-1HFI6-1326-SM-A9SL8	Normal(n=712)	3.93546	NA	NA
GTEX-1HFI7-0326-SM-9WPOX	Normal(n=712)	3.13077	NA	NA
GTEX-1HGF4-0726-SM-9WYU9	Normal(n=712)	3.08763	NA	NA
GTEX-1HKZK-0826-SM-A9G2C	Normal(n=712)	3.51979	NA	NA
GTEX-1HR98-0326-SM-CGQEL	Normal(n=712)	3.69377	NA	NA
GTEX-1HR9M-0626-SM-A96S6	Normal(n=712)	3.71699	NA	NA
GTEX-1HSEH-0826-SM-B2LXE	Normal(n=712)	3.45549	NA	NA
GTEX-1HSGN-0726-SM-A9G2F	Normal(n=712)	3.46989	NA	NA
GTEX-1HSKV-1026-SM-B2LWK	Normal(n=712)	3.20696	NA	NA
GTEX-1HSMO-0726-SM-A96TM	Normal(n=712)	3.93452	NA	NA
GTEX-1HSMQ-0526-SM-A96TY	Normal(n=712)	3.45694	NA	NA
GTEX-1HT8W-1526-SM-CE6S3	Normal(n=712)	3.61117	NA	NA
GTEX-1HUB1-1226-SM-B2LWX	Normal(n=712)	3.14274	NA	NA
GTEX-1I19N-0226-SM-CE6ST	Normal(n=712)	3.4493	NA	NA
GTEX-1I1GP-0326-SM-CNPQ4	Normal(n=712)	3.06039	NA	NA
GTEX-1I1GQ-0826-SM-CNNQR	Normal(n=712)	3.31759	NA	NA
GTEX-1I1GR-1126-SM-A9G2I	Normal(n=712)	3.17536	NA	NA
GTEX-1I1GS-0726-SM-C1YS7	Normal(n=712)	3.52105	NA	NA
GTEX-1I1GT-0826-SM-B2LWO	Normal(n=712)	3.19692	NA	NA
GTEX-1I1GU-0826-SM-ARZM5	Normal(n=712)	3.6427	NA	NA
GTEX-1I1GV-0726-SM-ARZLY	Normal(n=712)	3.77294	NA	NA
GTEX-1I6K6-0726-SM-B2LX4	Normal(n=712)	3.29807	NA	NA
GTEX-1I6K7-1126-SM-A96SW	Normal(n=712)	3.47897	NA	NA
GTEX-1ICG6-0426-SM-ARU7M	Normal(n=712)	3.20226	NA	NA
GTEX-1ICLY-0726-SM-A96TB	Normal(n=712)	3.33471	NA	NA
GTEX-1ICLZ-0526-SM-ARZM8	Normal(n=712)	3.50335	NA	NA
GTEX-1IDJC-1026-SM-A96T2	Normal(n=712)	3.10735	NA	NA
GTEX-1IDJH-0826-SM-CE6SY	Normal(n=712)	3.17377	NA	NA
GTEX-1IDJU-1626-SM-CJI4B	Normal(n=712)	3.54967	NA	NA
GTEX-1IE54-0926-SM-A9G2Y	Normal(n=712)	3.76765	NA	NA
GTEX-1IGQW-0626-SM-C1YR9	Normal(n=712)	3.99729	NA	NA
GTEX-1IKJJ-1026-SM-A96SQ	Normal(n=712)	2.93923	NA	NA
GTEX-1IKOE-0926-SM-ARU7X	Normal(n=712)	3.53232	NA	NA
GTEX-1IKOH-0626-SM-CJI35	Normal(n=712)	3.17393	NA	NA
GTEX-1IL2U-0826-SM-CL53Q	Normal(n=712)	3.65764	NA	NA
GTEX-1IL2V-0626-SM-ARU7S	Normal(n=712)	3.3941	NA	NA
GTEX-1IOXB-1026-SM-CJI4D	Normal(n=712)	2.99458	NA	NA
GTEX-1IY9M-1026-SM-A96TG	Normal(n=712)	3.29895	NA	NA
GTEX-1J1OQ-0526-SM-A9G2P	Normal(n=712)	3.73444	NA	NA
GTEX-1J1R8-0126-SM-CJI36	Normal(n=712)	2.9159	NA	NA
GTEX-1J8EW-1126-SM-A96T8	Normal(n=712)	3.34412	NA	NA
GTEX-1J8JJ-0726-SM-AHZ3E	Normal(n=712)	3.41129	NA	NA
GTEX-1J8Q3-0226-SM-C1YR4	Normal(n=712)	3.55704	NA	NA
GTEX-1J8QM-0726-SM-CE6RF	Normal(n=712)	3.03633	NA	NA
GTEX-1JJ6O-0626-SM-AHZ3H	Normal(n=712)	2.98368	NA	NA
GTEX-1JJE9-0226-SM-CY8HU	Normal(n=712)	3.35233	NA	NA
GTEX-1JJEA-0626-SM-D3L96	Normal(n=712)	3.09305	NA	NA
GTEX-1JK1U-0326-SM-CXZJH	Normal(n=712)	3.31354	NA	NA
GTEX-1JKYN-1126-SM-CGQG5	Normal(n=712)	3.43456	NA	NA
GTEX-1JKYR-0826-SM-ARU8L	Normal(n=712)	3.45101	NA	NA
GTEX-1JMLX-0826-SM-CNNPP	Normal(n=712)	3.51854	NA	NA
GTEX-1JMPY-0126-SM-CJI39	Normal(n=712)	3.00324	NA	NA
GTEX-1JMPZ-0626-SM-CY8HY	Normal(n=712)	3.79909	NA	NA
GTEX-1JMQJ-2026-SM-CNPP9	Normal(n=712)	3.63343	NA	NA
GTEX-1JMQK-2126-SM-CY8I2	Normal(n=712)	3.34497	NA	NA
GTEX-1JMQL-0926-SM-CJI3F	Normal(n=712)	3.35488	NA	NA
GTEX-1JN6P-0626-SM-ARZN6	Normal(n=712)	3.43429	NA	NA
GTEX-1K2DA-1526-SM-CGQGQ	Normal(n=712)	3.57168	NA	NA
GTEX-1K2DU-0126-SM-E9TIU	Normal(n=712)	3.4957	NA	NA
GTEX-1K9T9-0826-SM-EAZ4X	Normal(n=712)	3.31267	NA	NA
GTEX-1KAFJ-0426-SM-DHXJH	Normal(n=712)	3.29851	NA	NA
GTEX-1KANC-0826-SM-D3LA8	Normal(n=712)	3.6017	NA	NA
GTEX-1KD4Q-1026-SM-CXZKJ	Normal(n=712)	3.54102	NA	NA
GTEX-1KD5A-0426-SM-D4P3X	Normal(n=712)	3.58976	NA	NA
GTEX-1KXAM-1726-SM-D3LAE	Normal(n=712)	3.46858	NA	NA
GTEX-1LB8K-0626-SM-D4P3Z	Normal(n=712)	3.10047	NA	NA
GTEX-1LBAC-0726-SM-D3L9U	Normal(n=712)	3.89336	NA	NA
GTEX-1LG7Y-0626-SM-DHXJM	Normal(n=712)	3.44122	NA	NA
GTEX-1LG7Z-0526-SM-D4P3Q	Normal(n=712)	3.34894	NA	NA
GTEX-1LGOU-0126-SM-EV79W	Normal(n=712)	3.5435	NA	NA
GTEX-1LGRB-1226-SM-CNNPS	Normal(n=712)	3.34767	NA	NA
GTEX-1LH75-0626-SM-DIPG3	Normal(n=712)	3.5008	NA	NA
GTEX-1LSVX-0726-SM-E9TJG	Normal(n=712)	3.20977	NA	NA
GTEX-1LVAM-0826-SM-EV79X	Normal(n=712)	3.5741	NA	NA
GTEX-1LVAN-0726-SM-CNNPF	Normal(n=712)	3.25399	NA	NA
GTEX-1M4P7-0626-SM-EVR51	Normal(n=712)	3.81865	NA	NA
GTEX-1MA7X-0926-SM-DIPEJ	Normal(n=712)	3.26454	NA	NA
GTEX-1MCC2-0526-SM-DHXJS	Normal(n=712)	3.20163	NA	NA
GTEX-1MGNQ-0726-SM-DPRYH	Normal(n=712)	3.21925	NA	NA
GTEX-1MJK2-0826-SM-DTXE8	Normal(n=712)	3.52857	NA	NA
GTEX-1MJK3-0326-SM-DTX96	Normal(n=712)	3.15137	NA	NA
GTEX-1MUQO-0726-SM-E9TJM	Normal(n=712)	3.28185	NA	NA
GTEX-1N5O9-1026-SM-DTX8Y	Normal(n=712)	3.18507	NA	NA
GTEX-1NUQO-0926-SM-DTXEX	Normal(n=712)	3.27456	NA	NA
GTEX-1NV5F-0726-SM-DTXEH	Normal(n=712)	3.48285	NA	NA
GTEX-1O97I-1026-SM-E76PI	Normal(n=712)	3.24428	NA	NA
GTEX-1O9I2-1226-SM-E6CQC	Normal(n=712)	2.8482	NA	NA
GTEX-1OFPY-1526-SM-DTX8R	Normal(n=712)	2.8986	NA	NA
GTEX-1OJC3-0626-SM-E8VMO	Normal(n=712)	3.20132	NA	NA
GTEX-1OJC4-0526-SM-E6CQV	Normal(n=712)	3.17521	NA	NA
GTEX-1P4AB-1126-SM-DTX94	Normal(n=712)	3.78241	NA	NA
GTEX-1PBJI-0726-SM-EXUSQ	Normal(n=712)	2.51349	NA	NA
GTEX-1PBJJ-1926-SM-DTX8T	Normal(n=712)	3.64501	NA	NA
GTEX-1PDJ9-0826-SM-E76PS	Normal(n=712)	3.47768	NA	NA
GTEX-1PFEY-0226-SM-EVR3M	Normal(n=712)	3.39067	NA	NA
GTEX-1PIGE-0726-SM-DPRZD	Normal(n=712)	3.39876	NA	NA
GTEX-1PIIG-2026-SM-EVR43	Normal(n=712)	2.79327	NA	NA
GTEX-1PPGY-1426-SM-EVR3R	Normal(n=712)	3.50208	NA	NA
GTEX-1PPH8-0926-SM-DTX9U	Normal(n=712)	3.30597	NA	NA
GTEX-1PWST-0726-SM-EWRMO	Normal(n=712)	3.66562	NA	NA
GTEX-1QAET-0226-SM-EVR3T	Normal(n=712)	3.57531	NA	NA
GTEX-1QCLY-0826-SM-DTX8A	Normal(n=712)	3.38709	NA	NA
GTEX-1QCLZ-0626-SM-E6CR2	Normal(n=712)	3.58135	NA	NA
GTEX-1QEPI-0726-SM-E76QG	Normal(n=712)	3.24428	NA	NA
GTEX-1QMI2-0826-SM-EXUT4	Normal(n=712)	3.45167	NA	NA
GTEX-1QP28-0626-SM-E76P5	Normal(n=712)	3.46336	NA	NA
GTEX-1QP2A-0626-SM-DTX9C	Normal(n=712)	3.28703	NA	NA
GTEX-1QP66-0326-SM-DTX7V	Normal(n=712)	3.75061	NA	NA
GTEX-1QP67-0326-SM-EVR45	Normal(n=712)	3.34894	NA	NA
GTEX-1QP6S-2526-SM-DTX9Z	Normal(n=712)	3.55213	NA	NA
GTEX-1QP9N-0126-SM-DPRZS	Normal(n=712)	3.17871	NA	NA
GTEX-1QPFJ-0626-SM-DTX7Y	Normal(n=712)	3.47638	NA	NA
GTEX-1QW4Y-0226-SM-EAZ3U	Normal(n=712)	3.48929	NA	NA
GTEX-1R46S-0426-SM-EVR48	Normal(n=712)	3.49697	NA	NA
GTEX-1R9JW-0226-SM-EVR4K	Normal(n=712)	3.71809	NA	NA
GTEX-1R9K4-0726-SM-EWRN2	Normal(n=712)	3.22265	NA	NA
GTEX-1R9K5-0726-SM-EAZ4E	Normal(n=712)	3.85599	NA	NA
GTEX-1R9PM-0226-SM-DPRY7	Normal(n=712)	3.74308	NA	NA
GTEX-1RAZA-0826-SM-EAZ4I	Normal(n=712)	3.60526	NA	NA
GTEX-1RAZQ-0926-SM-EAZ4Q	Normal(n=712)	3.79597	NA	NA
GTEX-1RAZR-1126-SM-E6CRC	Normal(n=712)	3.70266	NA	NA
GTEX-1RAZS-1026-SM-E9TID	Normal(n=712)	3.56194	NA	NA
GTEX-1RDX4-0926-SM-E9U6D	Normal(n=712)	3.99639	NA	NA
GTEX-1RMOY-0126-SM-EWRNN	Normal(n=712)	3.56438	NA	NA
GTEX-1RNSC-1126-SM-E9TIP	Normal(n=712)	3.15332	NA	NA
GTEX-1RQEC-1026-SM-EVR5B	Normal(n=712)	3.55949	NA	NA
GTEX-1RQED-0926-SM-EWRNZ	Normal(n=712)	3.22389	NA	NA
GTEX-1S5ZU-0726-SM-EWROH	Normal(n=712)	3.90111	NA	NA
GTEX-1S83E-0726-SM-EV7B6	Normal(n=712)	3.50843	NA	NA
GTEX-N7MS-2326-SM-2HMLD	Normal(n=712)	3.34369	NA	NA
GTEX-NFK9-0726-SM-2HMJW	Normal(n=712)	3.1811	NA	NA
GTEX-O5YV-1526-SM-EV799	Normal(n=712)	3.69377	NA	NA
GTEX-OHPK-2626-SM-2HMK9	Normal(n=712)	2.93301	NA	NA
GTEX-OHPL-2626-SM-2HMJA	Normal(n=712)	3.15267	NA	NA
GTEX-OHPM-2626-SM-33HC5	Normal(n=712)	3.75061	NA	NA
GTEX-OIZF-2626-SM-7P8QZ	Normal(n=712)	3.12928	NA	NA
GTEX-OIZG-0226-SM-2TC5L	Normal(n=712)	3.2426	NA	NA
GTEX-OIZI-0726-SM-2XCEI	Normal(n=712)	3.71039	NA	NA
GTEX-OOBJ-2626-SM-2I3F6	Normal(n=712)	3.63343	NA	NA
GTEX-OXRK-0626-SM-2HMJ5	Normal(n=712)	3.19645	NA	NA
GTEX-OXRL-2626-SM-2I3F1	Normal(n=712)	2.89317	NA	NA
GTEX-OXRN-1526-SM-E6CHM	Normal(n=712)	3.18222	NA	NA
GTEX-OXRO-1226-SM-48TDL	Normal(n=712)	4.23573	NA	NA
GTEX-OXRP-0326-SM-33HBJ	Normal(n=712)	3.5472	NA	NA
GTEX-P44G-0626-SM-2I5EO	Normal(n=712)	3.02432	NA	NA
GTEX-P4PQ-2626-SM-33HC9	Normal(n=712)	3.40422	NA	NA
GTEX-P4QS-2626-SM-2I3EV	Normal(n=712)	3.49057	NA	NA
GTEX-P4QT-2626-SM-2I3FM	Normal(n=712)	3.02574	NA	NA
GTEX-P78B-0526-SM-2I5F7	Normal(n=712)	3.44943	NA	NA
GTEX-PLZ4-1226-SM-2I5FE	Normal(n=712)	3.774	NA	NA
GTEX-POYW-0826-SM-2XCEM	Normal(n=712)	4.6427	NA	NA
GTEX-PWCY-2326-SM-2I3EQ	Normal(n=712)	3.25595	NA	NA
GTEX-PWN1-2626-SM-2I3FH	Normal(n=712)	3.02396	NA	NA
GTEX-PX3G-2626-SM-2I3EG	Normal(n=712)	3.57652	NA	NA
GTEX-Q2AG-0826-SM-2HMKF	Normal(n=712)	3.82171	NA	NA
GTEX-Q2AH-0726-SM-2I3EA	Normal(n=712)	3.35938	NA	NA
GTEX-Q2AI-0326-SM-2I3EK	Normal(n=712)	3.336	NA	NA
GTEX-Q734-0526-SM-2I3EH	Normal(n=712)	3.80426	NA	NA
GTEX-QDT8-1226-SM-EVR35	Normal(n=712)	4.01525	NA	NA
GTEX-QDVJ-0226-SM-2I5FV	Normal(n=712)	2.95401	NA	NA
GTEX-QDVN-0626-SM-2I3FP	Normal(n=712)	3.40966	NA	NA
GTEX-QEG5-0826-SM-2I5GF	Normal(n=712)	3.5435	NA	NA
GTEX-QEL4-0726-SM-3GIJ5	Normal(n=712)	3.77505	NA	NA
GTEX-QLQ7-0726-SM-2I5G2	Normal(n=712)	3.31092	NA	NA
GTEX-QV31-0726-SM-3GAEG	Normal(n=712)	3.43656	NA	NA
GTEX-QV44-0826-SM-2S1RG	Normal(n=712)	3.95699	NA	NA
GTEX-QXCU-0326-SM-2TC63	Normal(n=712)	3.16495	NA	NA
GTEX-R3RS-0726-SM-3GIJR	Normal(n=712)	3.38211	NA	NA
GTEX-R53T-0526-SM-3GADL	Normal(n=712)	3.94205	NA	NA
GTEX-R55C-0626-SM-2TF4Q	Normal(n=712)	3.45891	NA	NA
GTEX-R55E-0826-SM-2TC5M	Normal(n=712)	3.45943	NA	NA
GTEX-R55G-0726-SM-2TC6J	Normal(n=712)	3.49825	NA	NA
GTEX-REY6-0526-SM-2TF5M	Normal(n=712)	3.33471	NA	NA
GTEX-RM2N-0526-SM-2TF4N	Normal(n=712)	3.64501	NA	NA
GTEX-RN5K-2826-SM-EZ6L3	Normal(n=712)	3.89627	NA	NA
GTEX-RN64-0626-SM-2TC5V	Normal(n=712)	3.68706	NA	NA
GTEX-RNOR-0926-SM-2TF56	Normal(n=712)	3.54967	NA	NA
GTEX-RTLS-0626-SM-5SI7Z	Normal(n=712)	3.46989	NA	NA
GTEX-RU1J-0226-SM-2TF5Y	Normal(n=712)	3.45549	NA	NA
GTEX-RU72-0126-SM-2TF6Z	Normal(n=712)	3.59455	NA	NA
GTEX-RUSQ-1026-SM-2TF6V	Normal(n=712)	3.36289	NA	NA
GTEX-RVPV-1226-SM-2TF73	Normal(n=712)	3.22419	NA	NA
GTEX-RWS6-0626-SM-2XCAS	Normal(n=712)	3.41197	NA	NA
GTEX-RWSA-0826-SM-2XCBF	Normal(n=712)	3.01578	NA	NA
GTEX-S32W-0726-SM-2XCBL	Normal(n=712)	3.12615	NA	NA
GTEX-S341-0226-SM-D4P1Y	Normal(n=712)	3.42048	NA	NA
GTEX-S7SE-0726-SM-2XCD7	Normal(n=712)	3.84699	NA	NA
GTEX-S7SF-0226-SM-5SI7H	Normal(n=712)	3.55582	NA	NA
GTEX-SE5C-0726-SM-4BRWY	Normal(n=712)	3.37476	NA	NA
GTEX-SIU8-0626-SM-2XCDN	Normal(n=712)	3.66789	NA	NA
GTEX-SJXC-0726-SM-2XCFJ	Normal(n=712)	4.01436	NA	NA
GTEX-SN8G-1526-SM-4DM79	Normal(n=712)	3.5472	NA	NA
GTEX-SNOS-0226-SM-32PLR	Normal(n=712)	3.30976	NA	NA
GTEX-SUCS-0226-SM-32PLQ	Normal(n=712)	3.48543	NA	NA
GTEX-T2IS-0626-SM-32QP6	Normal(n=712)	3.59813	NA	NA
GTEX-T5JW-1226-SM-3GACY	Normal(n=712)	3.5097	NA	NA
GTEX-T6MN-0626-SM-32PM9	Normal(n=712)	3.53107	NA	NA
GTEX-T6MO-0226-SM-32QOL	Normal(n=712)	3.6565	NA	NA
GTEX-T8EM-0226-SM-3DB7C	Normal(n=712)	3.33142	NA	NA
GTEX-TKQ1-0126-SM-33HB3	Normal(n=712)	3.25988	NA	NA
GTEX-TMMY-0826-SM-33HB9	Normal(n=712)	3.12035	NA	NA
GTEX-TSE9-0626-SM-3DB8B	Normal(n=712)	3.58015	NA	NA
GTEX-U3ZH-0226-SM-3DB7B	Normal(n=712)	3.35191	NA	NA
GTEX-U3ZM-0126-SM-3DB8M	Normal(n=712)	3.30129	NA	NA
GTEX-U3ZN-0326-SM-3DB86	Normal(n=712)	3.81967	NA	NA
GTEX-U412-0726-SM-EVR2Y	Normal(n=712)	3.55459	NA	NA
GTEX-U4B1-0626-SM-3DB8L	Normal(n=712)	3.6017	NA	NA
GTEX-U8T8-2326-SM-3DB96	Normal(n=712)	3.51349	NA	NA
GTEX-UJMC-0326-SM-3GAE2	Normal(n=712)	3.81352	NA	NA
GTEX-V1D1-0926-SM-4JBHQ	Normal(n=712)	3.67694	NA	NA
GTEX-V955-0426-SM-3GAEL	Normal(n=712)	3.53854	NA	NA
GTEX-VJYA-0426-SM-3GIJK	Normal(n=712)	3.79286	NA	NA
GTEX-VUSG-0426-SM-3GIKD	Normal(n=712)	3.78031	NA	NA
GTEX-W5WG-1426-SM-4KKZP	Normal(n=712)	3.36008	NA	NA
GTEX-W5X1-0426-SM-3GILB	Normal(n=712)	3.68818	NA	NA
GTEX-WEY5-0526-SM-3GIKZ	Normal(n=712)	3.68145	NA	NA
GTEX-WFG7-0326-SM-DKPO8	Normal(n=712)	3.39767	NA	NA
GTEX-WFG8-0426-SM-3GILD	Normal(n=712)	3.43296	NA	NA
GTEX-WFJO-0226-SM-3GIKW	Normal(n=712)	3.38915	NA	NA
GTEX-WH7G-0526-SM-3NMBI	Normal(n=712)	3.23481	NA	NA
GTEX-WHPG-0226-SM-3NMB9	Normal(n=712)	3.29146	NA	NA
GTEX-WHSB-1626-SM-3LK6J	Normal(n=712)	3.19613	NA	NA
GTEX-WHSE-0626-SM-4RGNF	Normal(n=712)	3.36667	NA	NA
GTEX-WK11-0926-SM-3NMAU	Normal(n=712)	3.44612	NA	NA
GTEX-WL46-0126-SM-3TW8I	Normal(n=712)	3.42747	NA	NA
GTEX-WOFL-0726-SM-3MJG4	Normal(n=712)	3.57652	NA	NA
GTEX-WRHU-0926-SM-4E3IG	Normal(n=712)	3.39767	NA	NA
GTEX-WVLH-0626-SM-3MJG7	Normal(n=712)	2.90323	NA	NA
GTEX-WWYW-0826-SM-3NB2X	Normal(n=712)	3.18587	NA	NA
GTEX-WXYG-0226-SM-3NB2Y	Normal(n=712)	3.4493	NA	NA
GTEX-WY7C-0226-SM-3NB37	Normal(n=712)	3.33256	NA	NA
GTEX-WYBS-1926-SM-3NM8N	Normal(n=712)	3.40272	NA	NA
GTEX-WYJK-1626-SM-3NM9J	Normal(n=712)	3.54967	NA	NA
GTEX-WYVS-0326-SM-3NM9V	Normal(n=712)	3.53605	NA	NA
GTEX-X15G-0526-SM-3NMB7	Normal(n=712)	3.72574	NA	NA
GTEX-X261-0726-SM-EZ6MH	Normal(n=712)	3.5509	NA	NA
GTEX-X4LF-0426-SM-3NMB5	Normal(n=712)	3.13636	NA	NA
GTEX-X4XX-0926-SM-46MV7	Normal(n=712)	3.65076	NA	NA
GTEX-X4XY-0826-SM-4E3JM	Normal(n=712)	3.64155	NA	NA
GTEX-X5EB-0726-SM-46MVR	Normal(n=712)	3.44956	NA	NA
GTEX-X8HC-0726-SM-46MWG	Normal(n=712)	3.35177	NA	NA
GTEX-XBED-0126-SM-47JY7	Normal(n=712)	3.48414	NA	NA
GTEX-XBEW-0126-SM-4AT66	Normal(n=712)	3.57168	NA	NA
GTEX-XGQ4-0426-SM-4AT4I	Normal(n=712)	3.53605	NA	NA
GTEX-XLM4-0726-SM-4AT64	Normal(n=712)	3.38419	NA	NA
GTEX-XMK1-0626-SM-4B65A	Normal(n=712)	3.45378	NA	NA
GTEX-XOT4-1526-SM-EAZ2W	Normal(n=712)	3.71149	NA	NA
GTEX-XUW1-1026-SM-4BONY	Normal(n=712)	3.42371	NA	NA
GTEX-XUZC-0126-SM-4BOO6	Normal(n=712)	3.34056	NA	NA
GTEX-XV7Q-0326-SM-4BRVM	Normal(n=712)	3.63227	NA	NA
GTEX-XXEK-1326-SM-4BRV1	Normal(n=712)	3.65191	NA	NA
GTEX-XYKS-0826-SM-4BRVF	Normal(n=712)	3.1416	NA	NA
GTEX-Y111-1926-SM-4SOIS	Normal(n=712)	3.58736	NA	NA
GTEX-Y114-0626-SM-4TT98	Normal(n=712)	3.29057	NA	NA
GTEX-Y3I4-0226-SM-4TT27	Normal(n=712)	2.93225	NA	NA
GTEX-Y3IK-0526-SM-4WWE3	Normal(n=712)	3.31223	NA	NA
GTEX-Y5LM-0626-SM-4V6G4	Normal(n=712)	3.47249	NA	NA
GTEX-Y5V5-0326-SM-5RQJG	Normal(n=712)	3.39383	NA	NA
GTEX-Y5V6-0526-SM-4VBRV	Normal(n=712)	3.5373	NA	NA
GTEX-Y8E4-0126-SM-4VBQ2	Normal(n=712)	3.6241	NA	NA
GTEX-Y9LG-0426-SM-4VBRT	Normal(n=712)	3.51854	NA	NA
GTEX-YB5E-0626-SM-4VDSE	Normal(n=712)	3.11736	NA	NA
GTEX-YB5K-0526-SM-5LUAS	Normal(n=712)	3.66676	NA	NA
GTEX-YEC3-0826-SM-4WWFP	Normal(n=712)	2.75146	NA	NA
GTEX-YEC4-0626-SM-5CVLU	Normal(n=712)	3.47638	NA	NA
GTEX-YF7O-0726-SM-4W213	Normal(n=712)	3.3238	NA	NA
GTEX-YFC4-2626-SM-5P9FQ	Normal(n=712)	3.81352	NA	NA
GTEX-YFCO-0326-SM-4W1ZP	Normal(n=712)	3.38585	NA	NA
GTEX-YJ89-0726-SM-5P9F7	Normal(n=712)	3.48414	NA	NA
GTEX-Z93S-0526-SM-EVYB4	Normal(n=712)	3.22543	NA	NA
GTEX-Z9EW-0226-SM-5CVM7	Normal(n=712)	3.15882	NA	NA
GTEX-ZA64-0426-SM-5HL96	Normal(n=712)	3.20289	NA	NA
GTEX-ZAB5-0726-SM-5P9JG	Normal(n=712)	3.6017	NA	NA
GTEX-ZAJG-0726-SM-5HL9A	Normal(n=712)	3.59455	NA	NA
GTEX-ZAK1-0726-SM-5HL8Q	Normal(n=712)	3.41034	NA	NA
GTEX-ZC5H-0626-SM-5LU9K	Normal(n=712)	3.83794	NA	NA
GTEX-ZDTS-0926-SM-5YY9D	Normal(n=712)	3.61471	NA	NA
GTEX-ZDXO-1726-SM-5HL6L	Normal(n=712)	3.74308	NA	NA
GTEX-ZDYS-0626-SM-5J2N5	Normal(n=712)	3.03685	NA	NA
GTEX-ZE7O-1126-SM-57WC8	Normal(n=712)	3.93734	NA	NA
GTEX-ZF28-0826-SM-4WKGJ	Normal(n=712)	3.58976	NA	NA
GTEX-ZF29-0726-SM-DO92H	Normal(n=712)	2.97618	NA	NA
GTEX-ZF3C-0826-SM-DO11E	Normal(n=712)	3.37212	NA	NA
GTEX-ZGAY-1026-SM-4WWBR	Normal(n=712)	3.55704	NA	NA
GTEX-ZLFU-0626-SM-4WWBO	Normal(n=712)	3.47768	NA	NA
GTEX-ZLV1-0126-SM-4WWBZ	Normal(n=712)	3.44665	NA	NA
GTEX-ZLWG-0526-SM-4WWFB	Normal(n=712)	3.22913	NA	NA
GTEX-ZPCL-0126-SM-4WWC8	Normal(n=712)	3.32236	NA	NA
GTEX-ZPIC-0226-SM-DO91T	Normal(n=712)	3.54473	NA	NA
GTEX-ZPU1-0426-SM-4WWCA	Normal(n=712)	3.64386	NA	NA
GTEX-ZQG8-0926-SM-57WFF	Normal(n=712)	3.25263	NA	NA
GTEX-ZQUD-0126-SM-7EPIS	Normal(n=712)	3.44969	NA	NA
GTEX-ZT9W-0226-SM-7SB6H	Normal(n=712)	2.8125	NA	NA
GTEX-ZT9X-0226-SM-51MT2	Normal(n=712)	3.57652	NA	NA
GTEX-ZTPG-0826-SM-5DUVC	Normal(n=712)	3.58496	NA	NA
GTEX-ZTSS-0226-SM-59877	Normal(n=712)	3.51979	NA	NA
GTEX-ZTX8-0626-SM-59HKC	Normal(n=712)	3.58616	NA	NA
GTEX-ZUA1-0926-SM-4YCDX	Normal(n=712)	3.86096	NA	NA
GTEX-ZV6S-0226-SM-59HJT	Normal(n=712)	3.09525	NA	NA
GTEX-ZV7C-0126-SM-57WDE	Normal(n=712)	3.59335	NA	NA
GTEX-ZVP2-0426-SM-57WC2	Normal(n=712)	3.30641	NA	NA
GTEX-ZVT3-0726-SM-5GICN	Normal(n=712)	3.29234	NA	NA
GTEX-ZVZP-1026-SM-5GICI	Normal(n=712)	3.38018	NA	NA
GTEX-ZVZQ-0626-SM-59HJU	Normal(n=712)	3.64039	NA	NA
GTEX-ZXG5-0926-SM-5NQ8H	Normal(n=712)	3.38612	NA	NA
GTEX-ZY6K-0226-SM-5SIAY	Normal(n=712)	3.56682	NA	NA
GTEX-ZYFC-0926-SM-5GZWW	Normal(n=712)	3.50335	NA	NA
GTEX-ZYFD-0826-SM-5NQ9A	Normal(n=712)	3.49057	NA	NA
GTEX-ZYFG-0626-SM-5GZYA	Normal(n=712)	3.356	NA	NA
GTEX-ZYT6-0426-SM-5GID3	Normal(n=712)	3.80219	NA	NA
GTEX-ZYVF-1126-SM-5E458	Normal(n=712)	3.69599	NA	NA
GTEX-ZYW4-1126-SM-5SI99	Normal(n=712)	3.42921	NA	NA
GTEX-ZYY3-1926-SM-5GZXS	Normal(n=712)	3.10903	NA	NA
GTEX-ZZ64-0126-SM-5GZXA	Normal(n=712)	3.36499	NA	NA
GTEX-ZZPU-1326-SM-5GZWS	Normal(n=712)	3.41967	NA	NA

## Sheet: ZCCHC10
rownames(datas)	Type	values	times	status
TCGA-IM-A420-01	G1(n=288)	3.51065	NA	NA
TCGA-EM-A3FO-01	G1(n=288)	4.27521	NA	NA
TCGA-EL-A3H7-01	G1(n=288)	3.60972	NA	NA
TCGA-BJ-A0ZC-01	G1(n=288)	4.22451	NA	NA
TCGA-EM-A4FO-01	G1(n=288)	3.64825	NA	NA
TCGA-DJ-A2PO-01	G1(n=288)	4.07883	NA	NA
TCGA-EL-A3ZT-01	G1(n=288)	3.84926	NA	NA
TCGA-DJ-A13O-01	G1(n=288)	3.49239	NA	NA
TCGA-EM-A1CW-01	G1(n=288)	3.78292	NA	NA
TCGA-E3-A3E2-01	G1(n=288)	4.43361	NA	NA
TCGA-E8-A416-01	G1(n=288)	4.38247	NA	NA
TCGA-ET-A2N3-01	G1(n=288)	4.32774	NA	NA
TCGA-DJ-A4V0-01	G1(n=288)	3.93646	NA	NA
TCGA-EL-A3T6-01	G1(n=288)	3.79425	NA	NA
TCGA-ET-A3BO-01	G1(n=288)	3.97189	NA	NA
TCGA-CE-A481-01	G1(n=288)	4.23459	NA	NA
TCGA-E8-A419-01	G1(n=288)	3.50276	NA	NA
TCGA-E8-A438-01	G1(n=288)	3.22534	NA	NA
TCGA-E3-A3E0-01	G1(n=288)	4.59989	NA	NA
TCGA-ET-A3DS-01	G1(n=288)	4.26909	NA	NA
TCGA-DJ-A4UL-01	G1(n=288)	4.05239	NA	NA
TCGA-EM-A2CK-01	G1(n=288)	4.12857	NA	NA
TCGA-J8-A3O1-01	G1(n=288)	4.43037	NA	NA
TCGA-FE-A237-01	G1(n=288)	3.88792	NA	NA
TCGA-EM-A3O8-01	G1(n=288)	4.10477	NA	NA
TCGA-H2-A2K9-01	G1(n=288)	4.52361	NA	NA
TCGA-DJ-A1QM-01	G1(n=288)	3.79663	NA	NA
TCGA-H2-A3RH-01	G1(n=288)	4.37006	NA	NA
TCGA-IM-A41Z-01	G1(n=288)	4.24887	NA	NA
TCGA-IM-A3EB-01	G1(n=288)	4.04694	NA	NA
TCGA-EL-A3ZN-01	G1(n=288)	3.77556	NA	NA
TCGA-EL-A3ZS-01	G1(n=288)	4.44053	NA	NA
TCGA-EL-A3GR-01	G1(n=288)	4.39592	NA	NA
TCGA-ET-A39R-01	G1(n=288)	4.18657	NA	NA
TCGA-ET-A25O-01	G1(n=288)	4.0712	NA	NA
TCGA-BJ-A2N8-01	G1(n=288)	3.98659	NA	NA
TCGA-DJ-A13W-01	G1(n=288)	1.62635	NA	NA
TCGA-EL-A3N2-01	G1(n=288)	3.90605	NA	NA
TCGA-EM-A4FF-01	G1(n=288)	3.85788	NA	NA
TCGA-KS-A4I3-01	G1(n=288)	3.86451	NA	NA
TCGA-EM-A1CV-01	G1(n=288)	4.38847	NA	NA
TCGA-BJ-A3PR-01	G1(n=288)	4.11251	NA	NA
TCGA-BJ-A45J-01	G1(n=288)	4.01437	NA	NA
TCGA-EM-A3SY-01	G1(n=288)	3.4058	NA	NA
TCGA-FK-A3S3-01	G1(n=288)	3.90768	NA	NA
TCGA-FY-A3NP-01	G1(n=288)	3.95457	NA	NA
TCGA-FY-A3BL-01	G1(n=288)	3.61022	NA	NA
TCGA-MK-A4N6-01	G1(n=288)	3.70935	NA	NA
TCGA-E8-A437-01	G1(n=288)	3.4668	NA	NA
TCGA-EM-A3FL-01	G1(n=288)	3.76801	NA	NA
TCGA-J8-A3YH-01	G1(n=288)	4.14735	NA	NA
TCGA-E8-A433-01	G1(n=288)	3.60753	NA	NA
TCGA-E8-A2EA-01	G1(n=288)	3.51143	NA	NA
TCGA-ET-A3BU-01	G1(n=288)	4.29818	NA	NA
TCGA-EL-A4K0-01	G1(n=288)	4.20221	NA	NA
TCGA-DJ-A2PR-01	G1(n=288)	4.64266	NA	NA
TCGA-DJ-A3VJ-01	G1(n=288)	4.48278	NA	NA
TCGA-ET-A3DO-01	G1(n=288)	3.7209	NA	NA
TCGA-DJ-A3UV-01	G1(n=288)	4.16837	NA	NA
TCGA-J8-A3O2-06	G1(n=288)	4.23101	NA	NA
TCGA-IM-A4EB-01	G1(n=288)	3.42252	NA	NA
TCGA-FE-A234-01	G1(n=288)	4.02297	NA	NA
TCGA-EM-A2CQ-01	G1(n=288)	4.0053	NA	NA
TCGA-FY-A40K-01	G1(n=288)	4.12809	NA	NA
TCGA-ET-A40P-01	G1(n=288)	4.18249	NA	NA
TCGA-EL-A4KH-01	G1(n=288)	3.68573	NA	NA
TCGA-CE-A27D-01	G1(n=288)	3.81109	NA	NA
TCGA-KS-A4I7-01	G1(n=288)	4.17158	NA	NA
TCGA-EM-A3SZ-01	G1(n=288)	3.64929	NA	NA
TCGA-DJ-A4V4-01	G1(n=288)	3.46852	NA	NA
TCGA-EL-A4KG-01	G1(n=288)	3.7434	NA	NA
TCGA-FE-A3PD-01	G1(n=288)	4.27268	NA	NA
TCGA-ET-A40R-01	G1(n=288)	4.16849	NA	NA
TCGA-EM-A4FK-01	G1(n=288)	4.48668	NA	NA
TCGA-BJ-A2N9-01	G1(n=288)	3.45511	NA	NA
TCGA-EM-A22Q-01	G1(n=288)	2.65037	NA	NA
TCGA-FE-A23A-01	G1(n=288)	3.01362	NA	NA
TCGA-J8-A3O0-01	G1(n=288)	4.18411	NA	NA
TCGA-IM-A3ED-01	G1(n=288)	3.75476	NA	NA
TCGA-BJ-A18Y-01	G1(n=288)	4.12874	NA	NA
TCGA-EL-A3GZ-01	G1(n=288)	4.24227	NA	NA
TCGA-BJ-A0ZJ-01	G1(n=288)	4.20901	NA	NA
TCGA-FE-A232-01	G1(n=288)	3.58476	NA	NA
TCGA-DJ-A3UP-01	G1(n=288)	4.1085	NA	NA
TCGA-DJ-A1QN-01	G1(n=288)	4.28417	NA	NA
TCGA-EM-A3AJ-01	G1(n=288)	4.13631	NA	NA
TCGA-BJ-A45K-01	G1(n=288)	4.04882	NA	NA
TCGA-DJ-A3V2-01	G1(n=288)	3.98898	NA	NA
TCGA-J8-A3O2-01	G1(n=288)	4.67282	NA	NA
TCGA-ET-A3BN-01	G1(n=288)	4.1306	NA	NA
TCGA-FY-A3R9-01	G1(n=288)	3.35762	NA	NA
TCGA-KS-A41J-01	G1(n=288)	3.59632	NA	NA
TCGA-EL-A4K2-01	G1(n=288)	4.08793	NA	NA
TCGA-FY-A3WA-01	G1(n=288)	4.14084	NA	NA
TCGA-DJ-A13S-01	G1(n=288)	3.52374	NA	NA
TCGA-EM-A2P1-06	G1(n=288)	3.56561	NA	NA
TCGA-DJ-A3US-01	G1(n=288)	4.17883	NA	NA
TCGA-ET-A39N-01	G1(n=288)	3.7493	NA	NA
TCGA-EM-A4FV-01	G1(n=288)	4.13204	NA	NA
TCGA-ET-A40T-01	G1(n=288)	4.20402	NA	NA
TCGA-ET-A25J-01	G1(n=288)	3.79907	NA	NA
TCGA-BJ-A28R-01	G1(n=288)	3.88643	NA	NA
TCGA-BJ-A3F0-01	G1(n=288)	3.59211	NA	NA
TCGA-E3-A3E1-01	G1(n=288)	4.07428	NA	NA
TCGA-DJ-A3UM-01	G1(n=288)	3.77449	NA	NA
TCGA-BJ-A291-01	G1(n=288)	3.49875	NA	NA
TCGA-E8-A417-01	G1(n=288)	3.97032	NA	NA
TCGA-FE-A235-01	G1(n=288)	3.58871	NA	NA
TCGA-CE-A483-01	G1(n=288)	4.37599	NA	NA
TCGA-KS-A41F-01	G1(n=288)	3.5551	NA	NA
TCGA-ET-A39S-01	G1(n=288)	4.21244	NA	NA
TCGA-DJ-A3VL-01	G1(n=288)	3.73507	NA	NA
TCGA-ET-A25K-01	G1(n=288)	3.81784	NA	NA
TCGA-ET-A3BS-01	G1(n=288)	3.64272	NA	NA
TCGA-H2-A421-01	G1(n=288)	3.22427	NA	NA
TCGA-KS-A41I-01	G1(n=288)	2.17779	NA	NA
TCGA-EL-A3GO-01	G1(n=288)	4.15788	NA	NA
TCGA-EM-A2CL-01	G1(n=288)	4.23201	NA	NA
TCGA-MK-A4N7-01	G1(n=288)	4.10619	NA	NA
TCGA-CE-A13K-01	G1(n=288)	3.99698	NA	NA
TCGA-DJ-A1QQ-01	G1(n=288)	3.81619	NA	NA
TCGA-EL-A3H3-01	G1(n=288)	3.65509	NA	NA
TCGA-DJ-A4UP-01	G1(n=288)	4.11262	NA	NA
TCGA-DE-A7U5-01	G1(n=288)	3.76265	NA	NA
TCGA-DJ-A3VA-01	G1(n=288)	4.30449	NA	NA
TCGA-DJ-A4UT-01	G1(n=288)	3.84281	NA	NA
TCGA-ET-A25I-01	G1(n=288)	3.13729	NA	NA
TCGA-BJ-A45E-01	G1(n=288)	2.6086	NA	NA
TCGA-EM-A2CT-01	G1(n=288)	4.38254	NA	NA
TCGA-FY-A3ON-01	G1(n=288)	4.61579	NA	NA
TCGA-BJ-A28W-01	G1(n=288)	3.70502	NA	NA
TCGA-EL-A3CX-01	G1(n=288)	4.49903	NA	NA
TCGA-DJ-A4V2-01	G1(n=288)	3.94667	NA	NA
TCGA-ET-A39M-01	G1(n=288)	3.18897	NA	NA
TCGA-FK-A3SB-01	G1(n=288)	4.20624	NA	NA
TCGA-H2-A422-01	G1(n=288)	3.69943	NA	NA
TCGA-DJ-A3UT-01	G1(n=288)	3.53892	NA	NA
TCGA-FK-A3SD-01	G1(n=288)	3.97928	NA	NA
TCGA-FY-A4B0-01	G1(n=288)	4.12227	NA	NA
TCGA-ET-A2MZ-01	G1(n=288)	4.25944	NA	NA
TCGA-E8-A2JQ-01	G1(n=288)	3.5303	NA	NA
TCGA-ET-A39L-01	G1(n=288)	4.4361	NA	NA
TCGA-EM-A3AP-01	G1(n=288)	4.39461	NA	NA
TCGA-MK-A4N9-01	G1(n=288)	4.04477	NA	NA
TCGA-DJ-A2PN-01	G1(n=288)	4.22171	NA	NA
TCGA-E3-A3DY-01	G1(n=288)	4.17619	NA	NA
TCGA-DJ-A3VD-01	G1(n=288)	4.10281	NA	NA
TCGA-ET-A3DP-01	G1(n=288)	3.76599	NA	NA
TCGA-EL-A4JW-01	G1(n=288)	3.87861	NA	NA
TCGA-E8-A415-01	G1(n=288)	4.0814	NA	NA
TCGA-ET-A3DU-01	G1(n=288)	2.81077	NA	NA
TCGA-FK-A3SE-01	G1(n=288)	4.51681	NA	NA
TCGA-DE-A69J-01	G1(n=288)	4.09027	NA	NA
TCGA-EL-A4K4-01	G1(n=288)	3.46132	NA	NA
TCGA-ET-A39I-01	G1(n=288)	4.16079	NA	NA
TCGA-EL-A3CZ-01	G1(n=288)	4.27756	NA	NA
TCGA-DJ-A1QG-01	G1(n=288)	3.40473	NA	NA
TCGA-GE-A2C6-01	G1(n=288)	3.99387	NA	NA
TCGA-DJ-A3UN-01	G1(n=288)	3.86742	NA	NA
TCGA-EL-A3ZP-01	G1(n=288)	3.94443	NA	NA
TCGA-J8-A3YE-01	G1(n=288)	4.14507	NA	NA
TCGA-DJ-A13T-01	G1(n=288)	4.3358	NA	NA
TCGA-EM-A3FQ-01	G1(n=288)	4.42258	NA	NA
TCGA-DJ-A3UY-01	G1(n=288)	3.92784	NA	NA
TCGA-FE-A230-01	G1(n=288)	3.31567	NA	NA
TCGA-EL-A3H1-01	G1(n=288)	4.47124	NA	NA
TCGA-DJ-A2PS-01	G1(n=288)	4.44667	NA	NA
TCGA-EM-A1CU-01	G1(n=288)	3.96311	NA	NA
TCGA-ET-A40Q-01	G1(n=288)	3.64042	NA	NA
TCGA-EL-A3ZH-01	G1(n=288)	4.28772	NA	NA
TCGA-ET-A3BQ-01	G1(n=288)	4.28442	NA	NA
TCGA-ET-A3BX-01	G1(n=288)	4.09983	NA	NA
TCGA-EL-A3ZL-01	G1(n=288)	3.68312	NA	NA
TCGA-EM-A22N-01	G1(n=288)	3.36628	NA	NA
TCGA-BJ-A2N7-01	G1(n=288)	4.13628	NA	NA
TCGA-DJ-A1QD-01	G1(n=288)	4.03499	NA	NA
TCGA-BJ-A45D-01	G1(n=288)	3.3602	NA	NA
TCGA-ET-A2MX-01	G1(n=288)	3.39508	NA	NA
TCGA-EM-A3AN-01	G1(n=288)	4.43429	NA	NA
TCGA-CE-A482-01	G1(n=288)	4.00909	NA	NA
TCGA-FY-A3RA-01	G1(n=288)	4.08542	NA	NA
TCGA-DE-A0Y2-01	G1(n=288)	3.88831	NA	NA
TCGA-BJ-A0ZG-01	G1(n=288)	4.19585	NA	NA
TCGA-DJ-A2PQ-01	G1(n=288)	4.40716	NA	NA
TCGA-DJ-A3VG-01	G1(n=288)	3.72223	NA	NA
TCGA-E8-A434-01	G1(n=288)	4.47734	NA	NA
TCGA-DJ-A2Q6-01	G1(n=288)	4.53028	NA	NA
TCGA-DJ-A2Q1-01	G1(n=288)	3.66723	NA	NA
TCGA-EM-A2P3-01	G1(n=288)	4.13157	NA	NA
TCGA-BJ-A28T-01	G1(n=288)	3.56285	NA	NA
TCGA-ET-A39O-01	G1(n=288)	3.76518	NA	NA
TCGA-EL-A3T1-01	G1(n=288)	3.64895	NA	NA
TCGA-E8-A44M-01	G1(n=288)	3.77381	NA	NA
TCGA-EM-A1CS-01	G1(n=288)	4.19658	NA	NA
TCGA-CE-A485-01	G1(n=288)	4.27075	NA	NA
TCGA-BJ-A0Z3-01	G1(n=288)	4.31968	NA	NA
TCGA-EL-A3ZK-01	G1(n=288)	3.53707	NA	NA
TCGA-EM-A3FJ-01	G1(n=288)	4.18459	NA	NA
TCGA-E8-A44K-01	G1(n=288)	3.26515	NA	NA
TCGA-EL-A3H8-01	G1(n=288)	4.49833	NA	NA
TCGA-BJ-A191-01	G1(n=288)	4.48571	NA	NA
TCGA-FY-A40M-01	G1(n=288)	4.44843	NA	NA
TCGA-EM-A2OZ-01	G1(n=288)	4.35868	NA	NA
TCGA-BJ-A28X-01	G1(n=288)	4.06179	NA	NA
TCGA-EL-A3GW-01	G1(n=288)	4.48069	NA	NA
TCGA-EM-A3FQ-06	G1(n=288)	3.69184	NA	NA
TCGA-IM-A41Y-01	G1(n=288)	2.99588	NA	NA
TCGA-DJ-A13L-01	G1(n=288)	3.74154	NA	NA
TCGA-DO-A1JZ-01	G1(n=288)	4.23357	NA	NA
TCGA-ET-A2MY-01	G1(n=288)	3.74104	NA	NA
TCGA-EL-A3T8-01	G1(n=288)	4.19134	NA	NA
TCGA-ET-A25P-01	G1(n=288)	4.20081	NA	NA
TCGA-EM-A3FK-01	G1(n=288)	4.53797	NA	NA
TCGA-H2-A3RI-01	G1(n=288)	4.10729	NA	NA
TCGA-DJ-A3V8-01	G1(n=288)	4.10834	NA	NA
TCGA-EM-A3SU-06	G1(n=288)	4.00331	NA	NA
TCGA-EL-A3CV-01	G1(n=288)	4.3054	NA	NA
TCGA-BJ-A45F-01	G1(n=288)	3.06607	NA	NA
TCGA-KS-A41L-01	G1(n=288)	3.38485	NA	NA
TCGA-DO-A1K0-01	G1(n=288)	3.70499	NA	NA
TCGA-EM-A3SX-01	G1(n=288)	4.35601	NA	NA
TCGA-ET-A39J-01	G1(n=288)	4.34651	NA	NA
TCGA-L6-A4EP-01	G1(n=288)	3.83669	NA	NA
TCGA-DJ-A13V-01	G1(n=288)	4.18929	NA	NA
TCGA-DE-A2OL-01	G1(n=288)	4.41702	NA	NA
TCGA-FY-A3I4-01	G1(n=288)	3.44055	NA	NA
TCGA-EM-A4FQ-01	G1(n=288)	3.14238	NA	NA
TCGA-EM-A2P1-01	G1(n=288)	3.41618	NA	NA
TCGA-EL-A3GQ-01	G1(n=288)	4.44269	NA	NA
TCGA-EL-A4JV-01	G1(n=288)	4.00213	NA	NA
TCGA-EL-A3D1-01	G1(n=288)	3.17133	NA	NA
TCGA-KS-A4ID-01	G1(n=288)	3.18992	NA	NA
TCGA-FY-A40N-01	G1(n=288)	4.24595	NA	NA
TCGA-FE-A233-01	G1(n=288)	3.84612	NA	NA
TCGA-DJ-A4UW-01	G1(n=288)	4.03888	NA	NA
TCGA-EM-A3AL-01	G1(n=288)	4.51717	NA	NA
TCGA-J8-A3YH-06	G1(n=288)	4.12344	NA	NA
TCGA-FE-A236-01	G1(n=288)	4.17194	NA	NA
TCGA-EM-A3AK-01	G1(n=288)	4.05649	NA	NA
TCGA-KS-A4I9-01	G1(n=288)	3.52571	NA	NA
TCGA-EM-A2CJ-01	G1(n=288)	4.13582	NA	NA
TCGA-CE-A484-01	G1(n=288)	4.00852	NA	NA
TCGA-ET-A25M-01	G1(n=288)	3.73553	NA	NA
TCGA-DJ-A13M-01	G1(n=288)	3.93776	NA	NA
TCGA-ET-A3BP-01	G1(n=288)	4.11748	NA	NA
TCGA-EL-A3TA-01	G1(n=288)	3.98346	NA	NA
TCGA-IM-A3U3-01	G1(n=288)	3.74077	NA	NA
TCGA-EM-A2CP-01	G1(n=288)	3.97448	NA	NA
TCGA-EM-A22L-01	G1(n=288)	4.08025	NA	NA
TCGA-DE-A4M9-01	G1(n=288)	4.11102	NA	NA
TCGA-DJ-A3UK-01	G1(n=288)	4.16305	NA	NA
TCGA-DE-A4MC-01	G1(n=288)	3.48295	NA	NA
TCGA-ET-A3BW-01	G1(n=288)	4.4326	NA	NA
TCGA-E8-A413-01	G1(n=288)	4.19586	NA	NA
TCGA-FK-A3SG-01	G1(n=288)	3.85773	NA	NA
TCGA-EM-A22M-01	G1(n=288)	2.87273	NA	NA
TCGA-EL-A3CY-01	G1(n=288)	4.47045	NA	NA
TCGA-FE-A3PB-01	G1(n=288)	3.58182	NA	NA
TCGA-EM-A3AR-01	G1(n=288)	4.43839	NA	NA
TCGA-EM-A3OB-01	G1(n=288)	4.24258	NA	NA
TCGA-DJ-A3UX-01	G1(n=288)	4.10642	NA	NA
TCGA-KS-A4I1-01	G1(n=288)	4.20414	NA	NA
TCGA-EL-A3ZG-01	G1(n=288)	4.20356	NA	NA
TCGA-ET-A3DT-01	G1(n=288)	3.59209	NA	NA
TCGA-EL-A3GX-01	G1(n=288)	3.96001	NA	NA
TCGA-EM-A2OW-01	G1(n=288)	3.48407	NA	NA
TCGA-DJ-A3VE-01	G1(n=288)	4.21175	NA	NA
TCGA-BJ-A2P4-01	G1(n=288)	3.69785	NA	NA
TCGA-EM-A4FU-01	G1(n=288)	3.46313	NA	NA
TCGA-FE-A3PC-01	G1(n=288)	3.16641	NA	NA
TCGA-EM-A3SU-01	G1(n=288)	3.32497	NA	NA
TCGA-EM-A4G1-01	G1(n=288)	4.11134	NA	NA
TCGA-KS-A4IB-01	G1(n=288)	3.72612	NA	NA
TCGA-ET-A3DR-01	G1(n=288)	4.58727	NA	NA
TCGA-ET-A25N-01	G1(n=288)	4.19896	NA	NA
TCGA-CE-A3MD-01	G1(n=288)	4.04025	NA	NA
TCGA-EM-A3FN-01	G1(n=288)	3.71934	NA	NA
TCGA-DJ-A2PX-01	G1(n=288)	4.06558	NA	NA
TCGA-EM-A2P0-01	G1(n=288)	4.45469	NA	NA
TCGA-EL-A3GS-01	G1(n=288)	4.19831	NA	NA
TCGA-EM-A4FR-01	G1(n=288)	3.32632	NA	NA
TCGA-EL-A4KD-01	G1(n=288)	3.88143	NA	NA
TCGA-FE-A238-01	G1(n=288)	3.93485	NA	NA
TCGA-DJ-A3UW-01	G1(n=288)	3.16306	NA	NA
TCGA-EM-A3AQ-01	G1(n=288)	4.13276	NA	NA
TCGA-EL-A4JX-01	G1(n=288)	2.747	NA	NA
TCGA-EL-A3D5-01	G1(n=288)	4.325	NA	NA
TCGA-ET-A3DQ-01	G1(n=288)	4.1232	NA	NA
TCGA-FE-A3PA-01	G2(n=52)	3.70681	NA	NA
TCGA-FY-A76V-01	G2(n=52)	4.02983	NA	NA
TCGA-EM-A2CR-01	G2(n=52)	2.54582	NA	NA
TCGA-BJ-A190-01	G2(n=52)	4.19933	NA	NA
TCGA-ET-A3DV-01	G2(n=52)	4.47436	NA	NA
TCGA-DJ-A4UR-01	G2(n=52)	3.27144	NA	NA
TCGA-EM-A3AI-01	G2(n=52)	3.92026	NA	NA
TCGA-EM-A1YD-01	G2(n=52)	4.22419	NA	NA
TCGA-DJ-A2PV-01	G2(n=52)	4.25555	NA	NA
TCGA-EM-A3O6-01	G2(n=52)	3.80336	NA	NA
TCGA-EM-A3FP-01	G2(n=52)	3.44563	NA	NA
TCGA-DJ-A13P-01	G2(n=52)	4.27222	NA	NA
TCGA-EL-A4K9-01	G2(n=52)	4.41924	NA	NA
TCGA-EL-A3CL-01	G2(n=52)	4.29079	NA	NA
TCGA-EM-A3OA-01	G2(n=52)	4.43106	NA	NA
TCGA-EL-A3MW-01	G2(n=52)	4.28776	NA	NA
TCGA-DJ-A1QF-01	G2(n=52)	3.88758	NA	NA
TCGA-DJ-A2PP-01	G2(n=52)	4.37704	NA	NA
TCGA-DJ-A2PU-01	G2(n=52)	4.37744	NA	NA
TCGA-ET-A40S-01	G2(n=52)	3.76845	NA	NA
TCGA-BJ-A0ZF-01	G2(n=52)	4.11698	NA	NA
TCGA-EM-A1YA-01	G2(n=52)	3.49532	NA	NA
TCGA-DJ-A3V3-01	G2(n=52)	3.65501	NA	NA
TCGA-BJ-A0ZA-01	G2(n=52)	4.18338	NA	NA
TCGA-BJ-A0Z0-01	G2(n=52)	4.79064	NA	NA
TCGA-EL-A3H2-01	G2(n=52)	4.29732	NA	NA
TCGA-DJ-A2QC-01	G2(n=52)	3.79185	NA	NA
TCGA-EL-A3CN-01	G2(n=52)	3.65058	NA	NA
TCGA-EL-A3GY-01	G2(n=52)	4.33335	NA	NA
TCGA-E8-A432-01	G2(n=52)	4.66745	NA	NA
TCGA-EL-A3T7-01	G2(n=52)	3.70101	NA	NA
TCGA-DJ-A3VM-01	G2(n=52)	3.86028	NA	NA
TCGA-BJ-A28S-01	G2(n=52)	3.91909	NA	NA
TCGA-BJ-A4O9-01	G2(n=52)	4.28261	NA	NA
TCGA-BJ-A0YZ-01	G2(n=52)	3.60026	NA	NA
TCGA-EL-A3ZR-01	G2(n=52)	3.95287	NA	NA
TCGA-EM-A1YB-01	G2(n=52)	2.6412	NA	NA
TCGA-FY-A3W9-01	G2(n=52)	4.0757	NA	NA
TCGA-DJ-A1QL-01	G2(n=52)	4.16072	NA	NA
TCGA-DJ-A1QI-01	G2(n=52)	4.45185	NA	NA
TCGA-EL-A3N3-01	G2(n=52)	3.4135	NA	NA
TCGA-EM-A2OV-01	G2(n=52)	3.5762	NA	NA
TCGA-EL-A3T3-01	G2(n=52)	3.67264	NA	NA
TCGA-CE-A3ME-01	G2(n=52)	4.19723	NA	NA
TCGA-E3-A3E3-01	G2(n=52)	3.63949	NA	NA
TCGA-EM-A22J-01	G2(n=52)	3.54016	NA	NA
TCGA-EL-A3ZQ-01	G2(n=52)	3.34611	NA	NA
TCGA-DJ-A2Q0-01	G2(n=52)	3.4718	NA	NA
TCGA-EM-A2CO-01	G2(n=52)	3.21412	NA	NA
TCGA-EM-A2OY-01	G2(n=52)	3.36506	NA	NA
TCGA-EM-A1YE-01	G2(n=52)	3.62533	NA	NA
TCGA-ET-A4KQ-01	G2(n=52)	4.0861	NA	NA
TCGA-ET-A2N0-01	G3(n=113)	3.15145	NA	NA
TCGA-EM-A1YC-01	G3(n=113)	3.22951	NA	NA
TCGA-MK-A84Z-01	G3(n=113)	3.79048	NA	NA
TCGA-FY-A3NN-01	G3(n=113)	4.08588	NA	NA
TCGA-DJ-A1QO-01	G3(n=113)	3.69518	NA	NA
TCGA-EL-A3GV-01	G3(n=113)	4.22022	NA	NA
TCGA-BJ-A2NA-01	G3(n=113)	3.92449	NA	NA
TCGA-EL-A3CM-01	G3(n=113)	3.43267	NA	NA
TCGA-EM-A3O3-01	G3(n=113)	3.51514	NA	NA
TCGA-FY-A3TY-01	G3(n=113)	4.35224	NA	NA
TCGA-EL-A3D6-01	G3(n=113)	3.40791	NA	NA
TCGA-J8-A3YF-01	G3(n=113)	3.49089	NA	NA
TCGA-ET-A25G-01	G3(n=113)	3.43824	NA	NA
TCGA-EM-A3FR-01	G3(n=113)	4.52875	NA	NA
TCGA-BJ-A3PT-01	G3(n=113)	3.69316	NA	NA
TCGA-DJ-A2Q7-01	G3(n=113)	4.32686	NA	NA
TCGA-FK-A3SH-01	G3(n=113)	4.07998	NA	NA
TCGA-DJ-A13X-01	G3(n=113)	4.18328	NA	NA
TCGA-EL-A3CU-01	G3(n=113)	4.25406	NA	NA
TCGA-J8-A3YD-01	G3(n=113)	3.90662	NA	NA
TCGA-FY-A3YR-01	G3(n=113)	3.08546	NA	NA
TCGA-BJ-A28V-01	G3(n=113)	4.36889	NA	NA
TCGA-E8-A242-01	G3(n=113)	3.05474	NA	NA
TCGA-EL-A3CR-01	G3(n=113)	3.49584	NA	NA
TCGA-FE-A239-01	G3(n=113)	4.17194	NA	NA
TCGA-DE-A69K-01	G3(n=113)	3.97793	NA	NA
TCGA-EL-A3D0-01	G3(n=113)	3.5461	NA	NA
TCGA-EM-A2CM-01	G3(n=113)	3.35314	NA	NA
TCGA-EL-A4K1-01	G3(n=113)	2.52872	NA	NA
TCGA-DJ-A2QA-01	G3(n=113)	3.20132	NA	NA
TCGA-ET-A3BV-01	G3(n=113)	4.13495	NA	NA
TCGA-EL-A4KI-01	G3(n=113)	4.49542	NA	NA
TCGA-DJ-A3VB-01	G3(n=113)	3.30938	NA	NA
TCGA-J8-A3YG-01	G3(n=113)	3.70377	NA	NA
TCGA-EL-A3T2-01	G3(n=113)	4.74666	NA	NA
TCGA-ET-A39K-01	G3(n=113)	3.31005	NA	NA
TCGA-H2-A26U-01	G3(n=113)	3.60594	NA	NA
TCGA-BJ-A45H-01	G3(n=113)	4.10397	NA	NA
TCGA-EM-A2P2-01	G3(n=113)	4.24554	NA	NA
TCGA-EL-A4K7-01	G3(n=113)	3.44786	NA	NA
TCGA-DJ-A3V4-01	G3(n=113)	3.91412	NA	NA
TCGA-FY-A3R8-01	G3(n=113)	3.99179	NA	NA
TCGA-DJ-A3UU-01	G3(n=113)	3.99176	NA	NA
TCGA-DJ-A3UQ-01	G3(n=113)	3.86608	NA	NA
TCGA-ET-A2N4-01	G3(n=113)	4.16559	NA	NA
TCGA-J8-A42S-01	G3(n=113)	4.16159	NA	NA
TCGA-J8-A4HW-01	G3(n=113)	4.40443	NA	NA
TCGA-FK-A4UB-01	G3(n=113)	3.52523	NA	NA
TCGA-DJ-A2PW-01	G3(n=113)	4.1848	NA	NA
TCGA-EL-A3MZ-01	G3(n=113)	3.49067	NA	NA
TCGA-BJ-A45C-01	G3(n=113)	3.92231	NA	NA
TCGA-EL-A3TB-01	G3(n=113)	3.88692	NA	NA
TCGA-BJ-A45G-01	G3(n=113)	3.92141	NA	NA
TCGA-DE-A0XZ-01	G3(n=113)	3.94573	NA	NA
TCGA-BJ-A45I-01	G3(n=113)	3.7014	NA	NA
TCGA-DJ-A2PZ-01	G3(n=113)	3.79714	NA	NA
TCGA-DJ-A3V7-01	G3(n=113)	3.93851	NA	NA
TCGA-DJ-A2Q4-01	G3(n=113)	3.9928	NA	NA
TCGA-DJ-A3UR-01	G3(n=113)	4.3217	NA	NA
TCGA-DJ-A3V5-01	G3(n=113)	4.03501	NA	NA
TCGA-DJ-A1QH-01	G3(n=113)	4.00187	NA	NA
TCGA-BJ-A3PU-01	G3(n=113)	3.33252	NA	NA
TCGA-BJ-A192-01	G3(n=113)	3.66779	NA	NA
TCGA-E8-A414-01	G3(n=113)	4.42761	NA	NA
TCGA-BJ-A0Z5-01	G3(n=113)	3.44569	NA	NA
TCGA-ET-A3DW-01	G3(n=113)	3.80325	NA	NA
TCGA-EM-A22I-01	G3(n=113)	3.35392	NA	NA
TCGA-DJ-A2Q3-01	G3(n=113)	3.83358	NA	NA
TCGA-L6-A4EU-01	G3(n=113)	3.49759	NA	NA
TCGA-DJ-A3UZ-01	G3(n=113)	4.19219	NA	NA
TCGA-DJ-A2PY-01	G3(n=113)	4.35161	NA	NA
TCGA-EL-A3GP-01	G3(n=113)	3.72487	NA	NA
TCGA-EM-A3O7-01	G3(n=113)	4.37206	NA	NA
TCGA-EM-A2CU-01	G3(n=113)	4.06251	NA	NA
TCGA-ET-A4KN-01	G3(n=113)	2.1746	NA	NA
TCGA-FY-A3R7-01	G3(n=113)	4.33758	NA	NA
TCGA-DJ-A2Q2-01	G3(n=113)	4.49494	NA	NA
TCGA-DJ-A1QE-01	G3(n=113)	3.8402	NA	NA
TCGA-DJ-A13U-01	G3(n=113)	3.6845	NA	NA
TCGA-EL-A4JZ-01	G3(n=113)	4.10476	NA	NA
TCGA-J8-A4HW-06	G3(n=113)	4.19761	NA	NA
TCGA-BJ-A0ZE-01	G3(n=113)	3.1109	NA	NA
TCGA-EM-A4FH-01	G3(n=113)	4.34271	NA	NA
TCGA-EL-A3CW-01	G3(n=113)	4.19419	NA	NA
TCGA-EM-A3ST-01	G3(n=113)	3.96854	NA	NA
TCGA-BJ-A290-01	G3(n=113)	4.2585	NA	NA
TCGA-FY-A3I5-01	G3(n=113)	3.79462	NA	NA
TCGA-FY-A4B4-01	G3(n=113)	3.75298	NA	NA
TCGA-FY-A4B3-01	G3(n=113)	4.58762	NA	NA
TCGA-ET-A39P-01	G3(n=113)	4.12094	NA	NA
TCGA-DJ-A13R-01	G3(n=113)	2.15788	NA	NA
TCGA-EL-A3CO-01	G3(n=113)	4.376	NA	NA
TCGA-KS-A4IC-01	G3(n=113)	3.8378	NA	NA
TCGA-DJ-A2PT-01	G3(n=113)	3.81546	NA	NA
TCGA-ET-A25R-01	G3(n=113)	3.19763	NA	NA
TCGA-EL-A3GU-01	G3(n=113)	3.79191	NA	NA
TCGA-DJ-A2Q9-01	G3(n=113)	4.56938	NA	NA
TCGA-J8-A3NZ-01	G3(n=113)	3.9439	NA	NA
TCGA-E3-A3DZ-01	G3(n=113)	4.44822	NA	NA
TCGA-DJ-A3VI-01	G3(n=113)	3.79757	NA	NA
TCGA-DJ-A3VK-01	G3(n=113)	4.22648	NA	NA
TCGA-BJ-A0Z9-01	G3(n=113)	3.77134	NA	NA
TCGA-EL-A3ZO-01	G3(n=113)	3.33138	NA	NA
TCGA-DE-A4M8-01	G3(n=113)	3.42005	NA	NA
TCGA-BJ-A28Z-01	G3(n=113)	3.3124	NA	NA
TCGA-EL-A3T0-01	G3(n=113)	4.15127	NA	NA
TCGA-DJ-A3V6-01	G3(n=113)	3.55323	NA	NA
TCGA-BJ-A4O8-01	G3(n=113)	3.70396	NA	NA
TCGA-DE-A4MA-01	G3(n=113)	2.87204	NA	NA
TCGA-ET-A2N5-01	G3(n=113)	3.77332	NA	NA
TCGA-ET-A39T-01	G3(n=113)	4.43659	NA	NA
TCGA-L6-A4EQ-01	G3(n=113)	3.88233	NA	NA
TCGA-FY-A3NM-01	G3(n=113)	4.48365	NA	NA
TCGA-KS-A4I5-01	G4(n=57)	3.83757	NA	NA
TCGA-EM-A4FM-01	G4(n=57)	3.18148	NA	NA
TCGA-DJ-A3V9-01	G4(n=57)	4.3735	NA	NA
TCGA-E8-A436-01	G4(n=57)	3.81351	NA	NA
TCGA-EM-A2OX-01	G4(n=57)	3.77155	NA	NA
TCGA-DE-A0Y3-01	G4(n=57)	3.71895	NA	NA
TCGA-EL-A3CT-01	G4(n=57)	3.6869	NA	NA
TCGA-EM-A22O-01	G4(n=57)	3.37029	NA	NA
TCGA-DE-A3KN-01	G4(n=57)	4.22536	NA	NA
TCGA-FE-A22Z-01	G4(n=57)	3.12889	NA	NA
TCGA-E8-A418-01	G4(n=57)	4.06299	NA	NA
TCGA-EL-A3D4-01	G4(n=57)	3.73752	NA	NA
TCGA-EM-A2CN-01	G4(n=57)	4.01849	NA	NA
TCGA-EM-A3AO-01	G4(n=57)	3.30143	NA	NA
TCGA-DJ-A4V5-01	G4(n=57)	4.33244	NA	NA
TCGA-EL-A3H5-01	G4(n=57)	2.63559	NA	NA
TCGA-EL-A3T9-01	G4(n=57)	4.16808	NA	NA
TCGA-EM-A3FM-01	G4(n=57)	2.53222	NA	NA
TCGA-QD-A8IV-01	G4(n=57)	4.20519	NA	NA
TCGA-EM-A2CS-01	G4(n=57)	4.31965	NA	NA
TCGA-EL-A3ZM-01	G4(n=57)	3.64299	NA	NA
TCGA-DJ-A3V0-01	G4(n=57)	3.31419	NA	NA
TCGA-ET-A3BT-01	G4(n=57)	4.06895	NA	NA
TCGA-J8-A4HY-01	G4(n=57)	3.46412	NA	NA
TCGA-EL-A4K6-01	G4(n=57)	3.54565	NA	NA
TCGA-EL-A3MY-01	G4(n=57)	3.97125	NA	NA
TCGA-E8-A3X7-01	G4(n=57)	3.18063	NA	NA
TCGA-BJ-A0ZB-01	G4(n=57)	3.56075	NA	NA
TCGA-EM-A4FN-01	G4(n=57)	3.15769	NA	NA
TCGA-FY-A40L-01	G4(n=57)	3.77457	NA	NA
TCGA-DJ-A3VF-01	G4(n=57)	3.81577	NA	NA
TCGA-BJ-A3EZ-01	G4(n=57)	3.9436	NA	NA
TCGA-DJ-A3UO-01	G4(n=57)	3.77203	NA	NA
TCGA-DE-A4MB-01	G4(n=57)	3.62327	NA	NA
TCGA-DE-A4MD-06	G4(n=57)	3.5463	NA	NA
TCGA-IM-A3U2-01	G4(n=57)	3.14631	NA	NA
TCGA-EM-A2CS-06	G4(n=57)	3.72237	NA	NA
TCGA-DJ-A2Q5-01	G4(n=57)	4.03762	NA	NA
TCGA-BJ-A0ZH-01	G4(n=57)	3.52273	NA	NA
TCGA-DJ-A2QB-01	G4(n=57)	4.00146	NA	NA
TCGA-DJ-A4UQ-01	G4(n=57)	4.45109	NA	NA
TCGA-BJ-A0Z2-01	G4(n=57)	4.00752	NA	NA
TCGA-ET-A25L-01	G4(n=57)	3.42798	NA	NA
TCGA-EL-A3MX-01	G4(n=57)	3.80898	NA	NA
TCGA-L6-A4ET-01	G4(n=57)	4.05682	NA	NA
TCGA-E3-A3E5-01	G4(n=57)	4.22556	NA	NA
TCGA-BJ-A18Z-01	G4(n=57)	3.6761	NA	NA
TCGA-4C-A93U-01	G4(n=57)	3.40355	NA	NA
TCGA-EL-A3CS-01	G4(n=57)	4.0524	NA	NA
TCGA-FY-A3R6-01	G4(n=57)	4.05377	NA	NA
TCGA-DO-A2HM-01	G4(n=57)	4.04411	NA	NA
TCGA-EM-A22P-01	G4(n=57)	4.51448	NA	NA
TCGA-DE-A4MD-01	G4(n=57)	3.82965	NA	NA
TCGA-EM-A22K-01	G4(n=57)	3.99779	NA	NA
TCGA-EM-A1CT-01	G4(n=57)	3.41068	NA	NA
TCGA-FE-A231-01	G4(n=57)	3.49365	NA	NA
TCGA-EL-A3H4-01	G4(n=57)	3.73941	NA	NA
TCGA-ET-A3DW-11	Normal(n=712)	4.27501	NA	NA
TCGA-EL-A3TA-11	Normal(n=712)	4.22473	NA	NA
TCGA-EL-A3T7-11	Normal(n=712)	4.00458	NA	NA
TCGA-BJ-A3PR-11	Normal(n=712)	3.75802	NA	NA
TCGA-DO-A1JZ-11	Normal(n=712)	4.06279	NA	NA
TCGA-BJ-A28W-11	Normal(n=712)	2.89689	NA	NA
TCGA-BJ-A28R-11	Normal(n=712)	4.23493	NA	NA
TCGA-KS-A41I-11	Normal(n=712)	4.23333	NA	NA
TCGA-EL-A3ZG-11	Normal(n=712)	4.11011	NA	NA
TCGA-BJ-A2N7-11	Normal(n=712)	4.41275	NA	NA
TCGA-EL-A3ZQ-11	Normal(n=712)	4.55249	NA	NA
TCGA-EM-A1CV-11	Normal(n=712)	4.43306	NA	NA
TCGA-BJ-A290-11	Normal(n=712)	4.15602	NA	NA
TCGA-EL-A3ZO-11	Normal(n=712)	4.37021	NA	NA
TCGA-EL-A3T8-11	Normal(n=712)	4.04213	NA	NA
TCGA-H2-A3RI-11	Normal(n=712)	4.37588	NA	NA
TCGA-EL-A3N2-11	Normal(n=712)	4.45159	NA	NA
TCGA-BJ-A28X-11	Normal(n=712)	4.27172	NA	NA
TCGA-EM-A1YC-11	Normal(n=712)	3.44808	NA	NA
TCGA-EL-A3MX-11	Normal(n=712)	3.76324	NA	NA
TCGA-ET-A2N5-11	Normal(n=712)	4.27505	NA	NA
TCGA-EL-A3T2-11	Normal(n=712)	4.60139	NA	NA
TCGA-GE-A2C6-11	Normal(n=712)	4.47551	NA	NA
TCGA-ET-A3DP-11	Normal(n=712)	4.64594	NA	NA
TCGA-BJ-A3PU-11	Normal(n=712)	4.5758	NA	NA
TCGA-EL-A3ZH-11	Normal(n=712)	4.43287	NA	NA
TCGA-EL-A3ZP-11	Normal(n=712)	4.43825	NA	NA
TCGA-EL-A3H2-11	Normal(n=712)	4.63069	NA	NA
TCGA-EM-A1CU-11	Normal(n=712)	4.79606	NA	NA
TCGA-EL-A3T3-11	Normal(n=712)	3.9793	NA	NA
TCGA-H2-A2K9-11	Normal(n=712)	4.13988	NA	NA
TCGA-EM-A3ST-11	Normal(n=712)	3.68635	NA	NA
TCGA-EL-A3H7-11	Normal(n=712)	4.49993	NA	NA
TCGA-EL-A3T6-11	Normal(n=712)	4.25908	NA	NA
TCGA-EL-A3MY-11	Normal(n=712)	4.17781	NA	NA
TCGA-EL-A3TB-11	Normal(n=712)	4.47922	NA	NA
TCGA-FY-A3TY-11	Normal(n=712)	4.00012	NA	NA
TCGA-EL-A3T0-11	Normal(n=712)	4.13145	NA	NA
TCGA-BJ-A2N8-11	Normal(n=712)	4.28962	NA	NA
TCGA-BJ-A2NA-11	Normal(n=712)	3.994	NA	NA
TCGA-EM-A1CS-11	Normal(n=712)	4.2601	NA	NA
TCGA-EL-A3ZR-11	Normal(n=712)	4.38049	NA	NA
TCGA-EL-A3ZS-11	Normal(n=712)	4.39362	NA	NA
TCGA-EM-A1CW-11	Normal(n=712)	4.63778	NA	NA
TCGA-ET-A2MX-11	Normal(n=712)	4.30282	NA	NA
TCGA-EL-A3ZT-11	Normal(n=712)	4.09283	NA	NA
TCGA-KS-A41L-11	Normal(n=712)	4.30577	NA	NA
TCGA-KS-A41J-11	Normal(n=712)	4.25088	NA	NA
TCGA-EM-A1CT-11	Normal(n=712)	4.2838	NA	NA
TCGA-E8-A2JQ-11	Normal(n=712)	4.61938	NA	NA
TCGA-EL-A3N3-11	Normal(n=712)	4.55147	NA	NA
TCGA-EL-A3H1-11	Normal(n=712)	4.3088	NA	NA
TCGA-EL-A3T1-11	Normal(n=712)	4.1884	NA	NA
TCGA-EL-A3MW-11	Normal(n=712)	4.41444	NA	NA
TCGA-EL-A3ZM-11	Normal(n=712)	4.3602	NA	NA
TCGA-BJ-A2N9-11	Normal(n=712)	3.97922	NA	NA
TCGA-EL-A3ZL-11	Normal(n=712)	4.44355	NA	NA
TCGA-EL-A3GZ-11	Normal(n=712)	4.51787	NA	NA
TCGA-EL-A3ZK-11	Normal(n=712)	4.02646	NA	NA
GTEX-111CU-0226-SM-5GZXC	Normal(n=712)	3.87676	NA	NA
GTEX-111FC-1026-SM-5GZX1	Normal(n=712)	3.75489	NA	NA
GTEX-111VG-0526-SM-5N9BW	Normal(n=712)	3.57046	NA	NA
GTEX-111YS-0726-SM-5GZY8	Normal(n=712)	3.75916	NA	NA
GTEX-1122O-0226-SM-5N9DA	Normal(n=712)	3.30947	NA	NA
GTEX-1128S-0126-SM-5H12S	Normal(n=712)	3.87086	NA	NA
GTEX-113JC-0126-SM-5EGJW	Normal(n=712)	3.32826	NA	NA
GTEX-117XS-0526-SM-5987Q	Normal(n=712)	3.79077	NA	NA
GTEX-117YW-0126-SM-5EGGN	Normal(n=712)	3.00988	NA	NA
GTEX-117YX-1226-SM-5H11S	Normal(n=712)	3.90689	NA	NA
GTEX-1192W-0126-SM-5EGGS	Normal(n=712)	3.57531	NA	NA
GTEX-1192X-1126-SM-5EGGU	Normal(n=712)	3.52982	NA	NA
GTEX-11DXX-0226-SM-5P9HL	Normal(n=712)	3.50462	NA	NA
GTEX-11DXY-0426-SM-5H12R	Normal(n=712)	3.75275	NA	NA
GTEX-11DXZ-0926-SM-5N9CG	Normal(n=712)	3.65306	NA	NA
GTEX-11DYG-0826-SM-5N9GH	Normal(n=712)	4.05572	NA	NA
GTEX-11DZ1-2726-SM-5A5KH	Normal(n=712)	3.87381	NA	NA
GTEX-11EI6-0726-SM-59866	Normal(n=712)	3.91743	NA	NA
GTEX-11EM3-0126-SM-5985K	Normal(n=712)	3.47249	NA	NA
GTEX-11EMC-0226-SM-5EGLP	Normal(n=712)	3.95327	NA	NA
GTEX-11EQ8-0826-SM-5N9FG	Normal(n=712)	4.11353	NA	NA
GTEX-11EQ9-0626-SM-5A5K1	Normal(n=712)	3.70377	NA	NA
GTEX-11GS4-0826-SM-5986J	Normal(n=712)	3.53481	NA	NA
GTEX-11GSO-0626-SM-5A5LW	Normal(n=712)	3.91073	NA	NA
GTEX-11GSP-0126-SM-5A5KU	Normal(n=712)	3.44692	NA	NA
GTEX-11I78-0526-SM-5986A	Normal(n=712)	3.45917	NA	NA
GTEX-11LCK-0526-SM-5A5M9	Normal(n=712)	3.62527	NA	NA
GTEX-11NSD-0126-SM-5987F	Normal(n=712)	3.81044	NA	NA
GTEX-11NUK-1026-SM-5HL5J	Normal(n=712)	3.68032	NA	NA
GTEX-11NV4-0626-SM-5N9BR	Normal(n=712)	3.91648	NA	NA
GTEX-11O72-2326-SM-5BC7H	Normal(n=712)	3.97085	NA	NA
GTEX-11OF3-0626-SM-5BC4Y	Normal(n=712)	4.59515	NA	NA
GTEX-11P7K-0226-SM-5986Z	Normal(n=712)	3.68032	NA	NA
GTEX-11P81-0126-SM-5HL5Y	Normal(n=712)	3.853	NA	NA
GTEX-11P82-0226-SM-5HL4O	Normal(n=712)	3.61117	NA	NA
GTEX-11TT1-1126-SM-5P9GV	Normal(n=712)	3.53978	NA	NA
GTEX-11TTK-0826-SM-5N9EG	Normal(n=712)	3.55213	NA	NA
GTEX-11TUW-0226-SM-5LU8X	Normal(n=712)	3.78031	NA	NA
GTEX-11UD2-0626-SM-5GU6L	Normal(n=712)	4.01436	NA	NA
GTEX-11VI4-0226-SM-5GU6C	Normal(n=712)	3.21599	NA	NA
GTEX-11XUK-0226-SM-5EQLW	Normal(n=712)	3.80735	NA	NA
GTEX-11ZTS-1126-SM-5LU9X	Normal(n=712)	3.5472	NA	NA
GTEX-11ZTT-1026-SM-5EQKF	Normal(n=712)	3.31571	NA	NA
GTEX-11ZVC-0126-SM-5986G	Normal(n=712)	3.75275	NA	NA
GTEX-1211K-0726-SM-5FQUW	Normal(n=712)	3.56071	NA	NA
GTEX-1212Z-0426-SM-5FQT6	Normal(n=712)	3.51602	NA	NA
GTEX-12584-0826-SM-5FQSK	Normal(n=712)	3.52857	NA	NA
GTEX-12696-0326-SM-5EGL4	Normal(n=712)	3.67016	NA	NA
GTEX-1269C-0226-SM-5EGKS	Normal(n=712)	3.80839	NA	NA
GTEX-12BJ1-0426-SM-5FQSO	Normal(n=712)	3.56682	NA	NA
GTEX-12WSC-0826-SM-5EQ5Q	Normal(n=712)	3.85	NA	NA
GTEX-12WSD-0926-SM-5GCNL	Normal(n=712)	3.84699	NA	NA
GTEX-12WSE-1226-SM-73KUF	Normal(n=712)	3.79077	NA	NA
GTEX-12WSG-0226-SM-5EGIF	Normal(n=712)	3.45838	NA	NA
GTEX-12WSH-0226-SM-5GCOG	Normal(n=712)	4.17393	NA	NA
GTEX-12WSJ-0326-SM-5GCMT	Normal(n=712)	3.58736	NA	NA
GTEX-12WSK-0926-SM-5CVNQ	Normal(n=712)	3.60407	NA	NA
GTEX-12WSL-0626-SM-5GCOY	Normal(n=712)	3.9991	NA	NA
GTEX-12WSN-0726-SM-5GCMS	Normal(n=712)	3.73444	NA	NA
GTEX-12ZZX-1226-SM-5EGHS	Normal(n=712)	3.41332	NA	NA
GTEX-12ZZY-0826-SM-5EQMT	Normal(n=712)	4.10434	NA	NA
GTEX-12ZZZ-1226-SM-59HK1	Normal(n=712)	4.31397	NA	NA
GTEX-13111-0226-SM-5EQ55	Normal(n=712)	3.73335	NA	NA
GTEX-13112-0326-SM-5P9IW	Normal(n=712)	3.72901	NA	NA
GTEX-13113-0126-SM-5LZVX	Normal(n=712)	3.46597	NA	NA
GTEX-1313W-0726-SM-5EGK1	Normal(n=712)	4.01078	NA	NA
GTEX-131XE-0126-SM-5LZVC	Normal(n=712)	3.90785	NA	NA
GTEX-131XF-1826-SM-5EGKG	Normal(n=712)	3.51854	NA	NA
GTEX-131XG-0226-SM-5IFG1	Normal(n=712)	3.55459	NA	NA
GTEX-131XH-0526-SM-5DUX7	Normal(n=712)	3.90497	NA	NA
GTEX-131YS-0726-SM-5P9G9	Normal(n=712)	3.35177	NA	NA
GTEX-132AR-1126-SM-5P9GA	Normal(n=712)	3.89821	NA	NA
GTEX-132NY-1026-SM-5P9IY	Normal(n=712)	3.6311	NA	NA
GTEX-132QS-0326-SM-5IJFN	Normal(n=712)	3.36261	NA	NA
GTEX-133LE-0326-SM-5P9G4	Normal(n=712)	3.47508	NA	NA
GTEX-1399R-0126-SM-5IFEV	Normal(n=712)	3.77716	NA	NA
GTEX-1399T-0126-SM-5KM15	Normal(n=712)	3.6837	NA	NA
GTEX-1399U-0326-SM-5P9G5	Normal(n=712)	3.70929	NA	NA
GTEX-139T6-0326-SM-5J2LY	Normal(n=712)	3.5509	NA	NA
GTEX-139TS-0126-SM-5K7XJ	Normal(n=712)	3.90977	NA	NA
GTEX-139UW-0126-SM-5KM1B	Normal(n=712)	3.10299	NA	NA
GTEX-139YR-1226-SM-5IFEU	Normal(n=712)	4.05398	NA	NA
GTEX-13CF3-0926-SM-5LZZC	Normal(n=712)	3.60881	NA	NA
GTEX-13D11-0226-SM-5LZXL	Normal(n=712)	3.38184	NA	NA
GTEX-13FH7-0126-SM-5KLZ1	Normal(n=712)	3.61235	NA	NA
GTEX-13FHO-0926-SM-5N9EW	Normal(n=712)	3.9364	NA	NA
GTEX-13FHP-0926-SM-5L3EC	Normal(n=712)	3.91743	NA	NA
GTEX-13FLV-0226-SM-5J2OF	Normal(n=712)	3.05589	NA	NA
GTEX-13FLW-0326-SM-5J2M4	Normal(n=712)	3.46989	NA	NA
GTEX-13FTW-0626-SM-5IFEX	Normal(n=712)	3.59455	NA	NA
GTEX-13FTY-0726-SM-5J2OH	Normal(n=712)	3.93263	NA	NA
GTEX-13FXS-0726-SM-5LZXJ	Normal(n=712)	3.75168	NA	NA
GTEX-13G51-1226-SM-5K7Z3	Normal(n=712)	3.853	NA	NA
GTEX-13IVO-0926-SM-5KLZP	Normal(n=712)	4.35826	NA	NA
GTEX-13JVG-0926-SM-5IJE1	Normal(n=712)	3.48156	NA	NA
GTEX-13N11-1026-SM-5K7XQ	Normal(n=712)	3.91265	NA	NA
GTEX-13N1W-0826-SM-5MR5J	Normal(n=712)	3.21459	NA	NA
GTEX-13N2G-0726-SM-5MR38	Normal(n=712)	3.70708	NA	NA
GTEX-13NYB-0726-SM-5MR4J	Normal(n=712)	3.77505	NA	NA
GTEX-13NYC-2426-SM-5MR3K	Normal(n=712)	3.80941	NA	NA
GTEX-13NZ8-0226-SM-5J2OK	Normal(n=712)	4.43363	NA	NA
GTEX-13NZ9-1126-SM-5MR37	Normal(n=712)	3.65191	NA	NA
GTEX-13NZA-1026-SM-5MR48	Normal(n=712)	3.61117	NA	NA
GTEX-13O1R-0826-SM-5J2MB	Normal(n=712)	3.8339	NA	NA
GTEX-13O21-2226-SM-5MR3L	Normal(n=712)	3.63459	NA	NA
GTEX-13O3O-0926-SM-5KM1F	Normal(n=712)	3.78555	NA	NA
GTEX-13O3P-0726-SM-5J2OM	Normal(n=712)	3.81455	NA	NA
GTEX-13O3Q-0626-SM-5IJG1	Normal(n=712)	3.73985	NA	NA
GTEX-13O61-0226-SM-5KM52	Normal(n=712)	3.40681	NA	NA
GTEX-13OVG-0226-SM-5LU93	Normal(n=712)	3.57168	NA	NA
GTEX-13OVI-0826-SM-5KLZ8	Normal(n=712)	3.34582	NA	NA
GTEX-13OVJ-0626-SM-5J2O2	Normal(n=712)	3.19393	NA	NA
GTEX-13OVK-0226-SM-6M472	Normal(n=712)	3.88069	NA	NA
GTEX-13OW5-0626-SM-5J2N2	Normal(n=712)	3.84097	NA	NA
GTEX-13OW6-0726-SM-5L3FX	Normal(n=712)	3.99548	NA	NA
GTEX-13OW7-0826-SM-5L3EL	Normal(n=712)	3.65878	NA	NA
GTEX-13OW8-0126-SM-5IJE5	Normal(n=712)	3.59455	NA	NA
GTEX-13PDP-1026-SM-5L3FA	Normal(n=712)	4.52732	NA	NA
GTEX-13PL6-1026-SM-5L3E5	Normal(n=712)	3.73985	NA	NA
GTEX-13PVQ-0726-SM-5L3GI	Normal(n=712)	3.854	NA	NA
GTEX-13PVR-0626-SM-5S2RC	Normal(n=712)	3.36905	NA	NA
GTEX-13QBU-0626-SM-5J2OG	Normal(n=712)	3.24808	NA	NA
GTEX-13QJ3-0926-SM-73KX5	Normal(n=712)	3.90014	NA	NA
GTEX-13QJC-0826-SM-5RQKC	Normal(n=712)	3.6837	NA	NA
GTEX-13RTJ-0326-SM-5YYAE	Normal(n=712)	3.71699	NA	NA
GTEX-13RTK-0326-SM-5RQHS	Normal(n=712)	3.58856	NA	NA
GTEX-13S86-1126-SM-5RQJX	Normal(n=712)	3.58376	NA	NA
GTEX-13U4I-0526-SM-5LU59	Normal(n=712)	3.8748	NA	NA
GTEX-13VXT-0626-SM-5SIA1	Normal(n=712)	3.85898	NA	NA
GTEX-13VXU-0826-SM-5KLZ2	Normal(n=712)	3.79181	NA	NA
GTEX-13W46-0926-SM-5LU3T	Normal(n=712)	3.97636	NA	NA
GTEX-13X6H-0526-SM-5LU4Q	Normal(n=712)	3.38722	NA	NA
GTEX-13X6J-0826-SM-5LU32	Normal(n=712)	3.74416	NA	NA
GTEX-13YAN-0926-SM-5O9C3	Normal(n=712)	4.02237	NA	NA
GTEX-144GL-1226-SM-5O9A4	Normal(n=712)	3.74846	NA	NA
GTEX-144GM-0226-SM-5Q5CB	Normal(n=712)	3.46467	NA	NA
GTEX-144GO-0126-SM-5LUAO	Normal(n=712)	3.68145	NA	NA
GTEX-145LT-0226-SM-5S2QK	Normal(n=712)	3.26033	NA	NA
GTEX-145LU-0426-SM-5O9AH	Normal(n=712)	3.85997	NA	NA
GTEX-145ME-0126-SM-5S2QM	Normal(n=712)	3.73769	NA	NA
GTEX-145MG-0826-SM-5Q5C2	Normal(n=712)	3.98368	NA	NA
GTEX-145MH-0426-SM-5LU8T	Normal(n=712)	3.96993	NA	NA
GTEX-145MI-1126-SM-5O9AK	Normal(n=712)	4.1811	NA	NA
GTEX-146FQ-0726-SM-5LUA7	Normal(n=712)	3.85898	NA	NA
GTEX-146FR-0326-SM-5SI8U	Normal(n=712)	3.60288	NA	NA
GTEX-14753-0926-SM-5Q5BI	Normal(n=712)	3.89045	NA	NA
GTEX-1477Z-0226-SM-5TDCI	Normal(n=712)	3.82477	NA	NA
GTEX-147F4-0826-SM-5QGRB	Normal(n=712)	3.46728	NA	NA
GTEX-147GR-0726-SM-5S2PL	Normal(n=712)	3.6792	NA	NA
GTEX-148VI-0526-SM-5TDDG	Normal(n=712)	3.81865	NA	NA
GTEX-148VJ-0726-SM-5LU8J	Normal(n=712)	4.02591	NA	NA
GTEX-1497J-0126-SM-5Q5BK	Normal(n=712)	3.64501	NA	NA
GTEX-14A5H-0726-SM-5Q5DW	Normal(n=712)	4.1127	NA	NA
GTEX-14A6H-2426-SM-5Q5BO	Normal(n=712)	3.68706	NA	NA
GTEX-14ABY-0926-SM-5Q5DY	Normal(n=712)	4.2032	NA	NA
GTEX-14AS3-0226-SM-5Q5B6	Normal(n=712)	3.59455	NA	NA
GTEX-14ASI-0726-SM-5Q5DC	Normal(n=712)	3.904	NA	NA
GTEX-14B4R-0126-SM-5TDE4	Normal(n=712)	3.7137	NA	NA
GTEX-14BIN-0126-SM-5TDCG	Normal(n=712)	3.58616	NA	NA
GTEX-14BMU-0226-SM-5S2QA	Normal(n=712)	3.62059	NA	NA
GTEX-14BMV-0726-SM-73KVE	Normal(n=712)	3.12615	NA	NA
GTEX-14C38-0826-SM-5S2U8	Normal(n=712)	3.94111	NA	NA
GTEX-14C39-0226-SM-5TDDW	Normal(n=712)	4.13668	NA	NA
GTEX-14C5O-0826-SM-5TDEG	Normal(n=712)	3.77083	NA	NA
GTEX-14DAQ-0826-SM-73KWT	Normal(n=712)	3.9542	NA	NA
GTEX-14E6C-2626-SM-5RQJP	Normal(n=712)	4.01078	NA	NA
GTEX-14E6E-0326-SM-73KY6	Normal(n=712)	3.84097	NA	NA
GTEX-14E7W-0926-SM-5YYA4	Normal(n=712)	3.58376	NA	NA
GTEX-14ICK-1626-SM-6ETZX	Normal(n=712)	3.72028	NA	NA
GTEX-14ICL-0426-SM-5RQJ3	Normal(n=712)	3.61824	NA	NA
GTEX-14JG6-1326-SM-9OSXU	Normal(n=712)	3.81455	NA	NA
GTEX-14JIY-1226-SM-6871R	Normal(n=712)	3.68032	NA	NA
GTEX-14PHW-2926-SM-6AJBA	Normal(n=712)	3.89045	NA	NA
GTEX-14PII-0826-SM-6871S	Normal(n=712)	3.97269	NA	NA
GTEX-14PJ3-0126-SM-69LQP	Normal(n=712)	3.44387	NA	NA
GTEX-14PJ4-0326-SM-664OT	Normal(n=712)	3.46989	NA	NA
GTEX-14PJ6-0326-SM-6871H	Normal(n=712)	2.85599	NA	NA
GTEX-14PJM-1326-SM-664NX	Normal(n=712)	3.3897	NA	NA
GTEX-14PJO-0626-SM-6LLHH	Normal(n=712)	3.90593	NA	NA
GTEX-14PK6-0426-SM-6EU1J	Normal(n=712)	4.1914	NA	NA
GTEX-14PKU-0326-SM-6AJA7	Normal(n=712)	3.6893	NA	NA
GTEX-14PKV-0626-SM-6AJA2	Normal(n=712)	3.67469	NA	NA
GTEX-14PN3-0826-SM-69LOS	Normal(n=712)	3.83491	NA	NA
GTEX-14PN4-1526-SM-6871V	Normal(n=712)	3.82985	NA	NA
GTEX-14PQA-1226-SM-6M47A	Normal(n=712)	3.82477	NA	NA
GTEX-14XAO-0426-SM-6AJB6	Normal(n=712)	3.70155	NA	NA
GTEX-15CHC-0126-SM-5YYBA	Normal(n=712)	3.35092	NA	NA
GTEX-15CHQ-0826-SM-69LOT	Normal(n=712)	3.8846	NA	NA
GTEX-15CHR-1726-SM-7DUGW	Normal(n=712)	3.65992	NA	NA
GTEX-15D1Q-0626-SM-6AJAZ	Normal(n=712)	3.69042	NA	NA
GTEX-15DDE-0626-SM-69LOK	Normal(n=712)	4.64559	NA	NA
GTEX-15DZA-0226-SM-7KFS6	Normal(n=712)	4.03034	NA	NA
GTEX-15EO6-0126-SM-6LPKJ	Normal(n=712)	3.99639	NA	NA
GTEX-15ER7-0726-SM-7KUMF	Normal(n=712)	3.48156	NA	NA
GTEX-15ETS-0526-SM-6PAN3	Normal(n=712)	3.854	NA	NA
GTEX-15EU6-1426-SM-6M48E	Normal(n=712)	3.52482	NA	NA
GTEX-15FZZ-0226-SM-6LLI4	Normal(n=712)	3.13439	NA	NA
GTEX-15G19-0626-SM-6M474	Normal(n=712)	3.8885	NA	NA
GTEX-15G1A-0326-SM-6M467	Normal(n=712)	3.61117	NA	NA
GTEX-15RIE-0426-SM-7KUMH	Normal(n=712)	3.73769	NA	NA
GTEX-15RIF-0326-SM-7KUFR	Normal(n=712)	3.38515	NA	NA
GTEX-15RJ7-0326-SM-6M47H	Normal(n=712)	3.45167	NA	NA
GTEX-15RJE-1326-SM-6LPI6	Normal(n=712)	3.47249	NA	NA
GTEX-15SB6-1526-SM-7KUMQ	Normal(n=712)	3.40558	NA	NA
GTEX-15SHU-0726-SM-7KUFI	Normal(n=712)	3.96532	NA	NA
GTEX-15SHV-0426-SM-6M476	Normal(n=712)	3.78869	NA	NA
GTEX-15UF6-1126-SM-6LPJ3	Normal(n=712)	3.71589	NA	NA
GTEX-169BO-0326-SM-7EPIM	Normal(n=712)	3.59455	NA	NA
GTEX-16AAH-0326-SM-7DHML	Normal(n=712)	3.26529	NA	NA
GTEX-16BQI-0726-SM-6LPJZ	Normal(n=712)	3.53481	NA	NA
GTEX-16GPK-0926-SM-6LPJ9	Normal(n=712)	3.6017	NA	NA
GTEX-16MT8-0626-SM-6M47Q	Normal(n=712)	3.5373	NA	NA
GTEX-16MTA-0726-SM-7KUL4	Normal(n=712)	3.78764	NA	NA
GTEX-16NGA-0326-SM-718AJ	Normal(n=712)	3.42412	NA	NA
GTEX-16NPX-1426-SM-6LPK3	Normal(n=712)	3.83491	NA	NA
GTEX-16XZY-0726-SM-79OMU	Normal(n=712)	3.36653	NA	NA
GTEX-16XZZ-0826-SM-7IGM3	Normal(n=712)	3.78241	NA	NA
GTEX-16YQH-0326-SM-6LPJV	Normal(n=712)	3.13881	NA	NA
GTEX-16Z82-0426-SM-7EPGX	Normal(n=712)	3.61589	NA	NA
GTEX-178AV-0726-SM-6LPJI	Normal(n=712)	3.70266	NA	NA
GTEX-17EVP-0126-SM-7EPHW	Normal(n=712)	3.5509	NA	NA
GTEX-17EVQ-0526-SM-7KFSK	Normal(n=712)	3.82477	NA	NA
GTEX-17F96-0526-SM-79OLE	Normal(n=712)	3.79701	NA	NA
GTEX-17F97-0626-SM-7IGOH	Normal(n=712)	3.55949	NA	NA
GTEX-17F9E-0626-SM-79ON5	Normal(n=712)	3.57168	NA	NA
GTEX-17F9Y-0526-SM-7EWDC	Normal(n=712)	3.9364	NA	NA
GTEX-17GQL-0226-SM-7LTAK	Normal(n=712)	3.30027	NA	NA
GTEX-17HG3-0226-SM-7EWEA	Normal(n=712)	3.6837	NA	NA
GTEX-17HGU-0826-SM-7EWE5	Normal(n=712)	3.86493	NA	NA
GTEX-17HHE-0426-SM-79OK3	Normal(n=712)	3.95233	NA	NA
GTEX-17HHY-0826-SM-7EPID	Normal(n=712)	3.41265	NA	NA
GTEX-17HII-1926-SM-79OLB	Normal(n=712)	4.21956	NA	NA
GTEX-17JCI-0626-SM-7IGM7	Normal(n=712)	3.3505	NA	NA
GTEX-17KNJ-1026-SM-79ONK	Normal(n=712)	3.60051	NA	NA
GTEX-17MF6-0626-SM-7LT8D	Normal(n=712)	3.52982	NA	NA
GTEX-183FY-0626-SM-79OKR	Normal(n=712)	3.99367	NA	NA
GTEX-183WM-2626-SM-7KFRY	Normal(n=712)	3.89821	NA	NA
GTEX-18465-1426-SM-7KFTF	Normal(n=712)	4.09001	NA	NA
GTEX-18A66-0826-SM-72D5Z	Normal(n=712)	3.96162	NA	NA
GTEX-18A67-0826-SM-7KFTI	Normal(n=712)	3.50335	NA	NA
GTEX-18A6Q-0726-SM-7LT8Y	Normal(n=712)	3.27903	NA	NA
GTEX-18A7A-0826-SM-7KFTJ	Normal(n=712)	3.74093	NA	NA
GTEX-18D9A-0126-SM-7KFSI	Normal(n=712)	3.91169	NA	NA
GTEX-18D9B-0726-SM-72D6K	Normal(n=712)	3.29954	NA	NA
GTEX-18D9U-1026-SM-72D5R	Normal(n=712)	3.74093	NA	NA
GTEX-18QFQ-0726-SM-7LG6D	Normal(n=712)	3.39835	NA	NA
GTEX-1A3MV-0326-SM-73KW7	Normal(n=712)	3.77083	NA	NA
GTEX-1A8FM-0726-SM-7DUGK	Normal(n=712)	3.77926	NA	NA
GTEX-1A8G6-0626-SM-7IGNB	Normal(n=712)	3.37086	NA	NA
GTEX-1A8G7-1026-SM-73KVA	Normal(n=712)	3.72465	NA	NA
GTEX-1AMEY-0126-SM-73KTX	Normal(n=712)	3.09508	NA	NA
GTEX-1AMFI-0526-SM-7189M	Normal(n=712)	3.55459	NA	NA
GTEX-1AX8Z-0826-SM-7DUFZ	Normal(n=712)	3.86096	NA	NA
GTEX-1AX9I-0626-SM-72D54	Normal(n=712)	3.81762	NA	NA
GTEX-1AX9J-2126-SM-731DD	Normal(n=712)	3.83794	NA	NA
GTEX-1AX9K-0626-SM-73KVD	Normal(n=712)	3.69265	NA	NA
GTEX-1AYCT-0226-SM-73KVB	Normal(n=712)	3.89433	NA	NA
GTEX-1B8KE-0626-SM-7189H	Normal(n=712)	3.28939	NA	NA
GTEX-1B8KZ-0426-SM-731DP	Normal(n=712)	3.67807	NA	NA
GTEX-1B8L1-1626-SM-7IGMH	Normal(n=712)	3.59932	NA	NA
GTEX-1B8SF-0626-SM-73KVV	Normal(n=712)	4.31759	NA	NA
GTEX-1B8SG-1126-SM-7IGMT	Normal(n=712)	3.62059	NA	NA
GTEX-1B932-0926-SM-73KUP	Normal(n=712)	4.11437	NA	NA
GTEX-1B933-1026-SM-7P8RO	Normal(n=712)	3.4359	NA	NA
GTEX-1B97I-0326-SM-7DUGB	Normal(n=712)	3.86691	NA	NA
GTEX-1B97J-0626-SM-7P8RU	Normal(n=712)	3.50716	NA	NA
GTEX-1BAJH-0926-SM-79OO6	Normal(n=712)	3.65076	NA	NA
GTEX-1C2JI-0326-SM-7EWFD	Normal(n=712)	2.89472	NA	NA
GTEX-1C475-0226-SM-7MGXM	Normal(n=712)	3.09255	NA	NA
GTEX-1C4CL-0726-SM-7IGP9	Normal(n=712)	4.20555	NA	NA
GTEX-1C64N-1026-SM-79ONM	Normal(n=712)	3.91456	NA	NA
GTEX-1C6VQ-0526-SM-7MGWD	Normal(n=712)	2.98514	NA	NA
GTEX-1C6VR-0426-SM-7IGN6	Normal(n=712)	3.68818	NA	NA
GTEX-1C6VS-0826-SM-7EWEI	Normal(n=712)	3.849	NA	NA
GTEX-1CAMQ-1126-SM-7EWFE	Normal(n=712)	3.48929	NA	NA
GTEX-1CAMR-0226-SM-7DUGO	Normal(n=712)	3.7148	NA	NA
GTEX-1CAMS-0826-SM-7P8P1	Normal(n=712)	3.66903	NA	NA
GTEX-1CB4E-0326-SM-7MXT3	Normal(n=712)	3.11803	NA	NA
GTEX-1CB4F-0826-SM-793CV	Normal(n=712)	3.66448	NA	NA
GTEX-1CB4G-1526-SM-7P8QG	Normal(n=712)	3.42398	NA	NA
GTEX-1CB4H-0126-SM-7IGN2	Normal(n=712)	3.54597	NA	NA
GTEX-1CB4I-0726-SM-7DUGS	Normal(n=712)	3.81967	NA	NA
GTEX-1CB4J-1426-SM-7MKFR	Normal(n=712)	3.86196	NA	NA
GTEX-1E1VI-0726-SM-7P8QJ	Normal(n=712)	3.37072	NA	NA
GTEX-1EH9U-0926-SM-7EWF1	Normal(n=712)	3.24929	NA	NA
GTEX-1EKGG-0726-SM-7IGPX	Normal(n=712)	3.43736	NA	NA
GTEX-1EMGI-0826-SM-7EPHY	Normal(n=712)	3.38225	NA	NA
GTEX-1EN7A-1026-SM-7IGPZ	Normal(n=712)	4.13093	NA	NA
GTEX-1EU9M-0626-SM-7MXUT	Normal(n=712)	3.31832	NA	NA
GTEX-1EWIQ-0826-SM-7MXTH	Normal(n=712)	3.93263	NA	NA
GTEX-1EX96-0126-SM-9KNVH	Normal(n=712)	4.08236	NA	NA
GTEX-1F48J-0926-SM-7P8PZ	Normal(n=712)	3.57168	NA	NA
GTEX-1F52S-0526-SM-7P8TP	Normal(n=712)	4.04614	NA	NA
GTEX-1F5PL-0826-SM-7MXU7	Normal(n=712)	3.45062	NA	NA
GTEX-1F6IF-1126-SM-9KNV2	Normal(n=712)	4.0197	NA	NA
GTEX-1F75A-0326-SM-7MXTR	Normal(n=712)	4.09845	NA	NA
GTEX-1F75B-0826-SM-9QEIT	Normal(n=712)	3.62293	NA	NA
GTEX-1F75I-0926-SM-7MXUU	Normal(n=712)	3.73877	NA	NA
GTEX-1F88F-0726-SM-7P8R7	Normal(n=712)	3.32207	NA	NA
GTEX-1FIGZ-0226-SM-7P8QR	Normal(n=712)	3.76022	NA	NA
GTEX-1GF9U-0226-SM-7P8TY	Normal(n=712)	3.72683	NA	NA
GTEX-1GF9V-0926-SM-9KNW7	Normal(n=712)	4.1914	NA	NA
GTEX-1GF9W-0626-SM-7MXVJ	Normal(n=712)	3.92029	NA	NA
GTEX-1GF9X-0126-SM-A9G38	Normal(n=712)	3.82069	NA	NA
GTEX-1GL5R-0626-SM-7PBZY	Normal(n=712)	3.96347	NA	NA
GTEX-1GMR3-0726-SM-9WPOF	Normal(n=712)	3.56682	NA	NA
GTEX-1GMR8-0826-SM-9KNUR	Normal(n=712)	4.11353	NA	NA
GTEX-1GMRU-1126-SM-9KNV1	Normal(n=712)	4.0321	NA	NA
GTEX-1GN1U-0826-SM-9WPPX	Normal(n=712)	4.17233	NA	NA
GTEX-1GN1V-0626-SM-7P8QU	Normal(n=712)	4.23036	NA	NA
GTEX-1GN1W-0126-SM-7MXV7	Normal(n=712)	3.29042	NA	NA
GTEX-1GN2E-0826-SM-9WYT8	Normal(n=712)	3.41752	NA	NA
GTEX-1GN73-0826-SM-9OSW4	Normal(n=712)	3.72465	NA	NA
GTEX-1GPI7-0726-SM-9WG84	Normal(n=712)	3.79909	NA	NA
GTEX-1GTWX-0726-SM-9WPPA	Normal(n=712)	3.56803	NA	NA
GTEX-1GZ2Q-0826-SM-7P8TK	Normal(n=712)	3.89142	NA	NA
GTEX-1GZ4H-0226-SM-9JGGJ	Normal(n=712)	2.60502	NA	NA
GTEX-1GZ4I-0626-SM-9WPPN	Normal(n=712)	3.2394	NA	NA
GTEX-1GZHY-1426-SM-9WG5H	Normal(n=712)	3.75809	NA	NA
GTEX-1H11D-0626-SM-9WPQ1	Normal(n=712)	3.91552	NA	NA
GTEX-1H1CY-0726-SM-9OSXX	Normal(n=712)	3.67356	NA	NA
GTEX-1H1DE-0226-SM-ARZN8	Normal(n=712)	3.42264	NA	NA
GTEX-1H1DF-1026-SM-9QEJ1	Normal(n=712)	4.28762	NA	NA
GTEX-1H1DG-0726-SM-A96TN	Normal(n=712)	4.23496	NA	NA
GTEX-1H1E6-0326-SM-9OSWE	Normal(n=712)	3.74201	NA	NA
GTEX-1H1ZS-0726-SM-A9G3K	Normal(n=712)	3.65535	NA	NA
GTEX-1H2FU-0626-SM-9WPPS	Normal(n=712)	3.30539	NA	NA
GTEX-1H3VE-0826-SM-9KNVQ	Normal(n=712)	3.53854	NA	NA
GTEX-1HB9E-0826-SM-CNNQJ	Normal(n=712)	3.9514	NA	NA
GTEX-1HBPH-0926-SM-A9SME	Normal(n=712)	3.71809	NA	NA
GTEX-1HBPI-0826-SM-9WYTX	Normal(n=712)	3.64386	NA	NA
GTEX-1HBPM-0926-SM-ARL9C	Normal(n=712)	3.62176	NA	NA
GTEX-1HBPN-1226-SM-B2LW9	Normal(n=712)	3.19267	NA	NA
GTEX-1HC8U-1226-SM-9WYUW	Normal(n=712)	3.85599	NA	NA
GTEX-1HCU7-0826-SM-B2LX7	Normal(n=712)	3.78973	NA	NA
GTEX-1HCU9-0226-SM-9WPNT	Normal(n=712)	3.82477	NA	NA
GTEX-1HCUA-0126-SM-B2LWC	Normal(n=712)	3.50716	NA	NA
GTEX-1HCVE-0726-SM-A96SH	Normal(n=712)	3.67469	NA	NA
GTEX-1HFI6-1326-SM-A9SL8	Normal(n=712)	3.98732	NA	NA
GTEX-1HFI7-0326-SM-9WPOX	Normal(n=712)	3.51349	NA	NA
GTEX-1HGF4-0726-SM-9WYU9	Normal(n=712)	3.5435	NA	NA
GTEX-1HKZK-0826-SM-A9G2C	Normal(n=712)	3.75702	NA	NA
GTEX-1HR98-0326-SM-CGQEL	Normal(n=712)	3.87676	NA	NA
GTEX-1HR9M-0626-SM-A96S6	Normal(n=712)	3.70266	NA	NA
GTEX-1HSEH-0826-SM-B2LXE	Normal(n=712)	3.47897	NA	NA
GTEX-1HSGN-0726-SM-A9G2F	Normal(n=712)	3.45878	NA	NA
GTEX-1HSKV-1026-SM-B2LWK	Normal(n=712)	3.58015	NA	NA
GTEX-1HSMO-0726-SM-A96TM	Normal(n=712)	3.90785	NA	NA
GTEX-1HSMQ-0526-SM-A96TY	Normal(n=712)	3.84699	NA	NA
GTEX-1HT8W-1526-SM-CE6S3	Normal(n=712)	3.76129	NA	NA
GTEX-1HUB1-1226-SM-B2LWX	Normal(n=712)	3.93734	NA	NA
GTEX-1I19N-0226-SM-CE6ST	Normal(n=712)	3.48543	NA	NA
GTEX-1I1GP-0326-SM-CNPQ4	Normal(n=712)	4.2891	NA	NA
GTEX-1I1GQ-0826-SM-CNNQR	Normal(n=712)	3.57894	NA	NA
GTEX-1I1GR-1126-SM-A9G2I	Normal(n=712)	3.7666	NA	NA
GTEX-1I1GS-0726-SM-C1YS7	Normal(n=712)	3.8125	NA	NA
GTEX-1I1GT-0826-SM-B2LWO	Normal(n=712)	3.60051	NA	NA
GTEX-1I1GU-0826-SM-ARZM5	Normal(n=712)	3.80529	NA	NA
GTEX-1I1GV-0726-SM-ARZLY	Normal(n=712)	3.78869	NA	NA
GTEX-1I6K6-0726-SM-B2LX4	Normal(n=712)	3.90207	NA	NA
GTEX-1I6K7-1126-SM-A96SW	Normal(n=712)	3.63807	NA	NA
GTEX-1ICG6-0426-SM-ARU7M	Normal(n=712)	3.28585	NA	NA
GTEX-1ICLY-0726-SM-A96TB	Normal(n=712)	3.64731	NA	NA
GTEX-1ICLZ-0526-SM-ARZM8	Normal(n=712)	3.58015	NA	NA
GTEX-1IDJC-1026-SM-A96T2	Normal(n=712)	3.65992	NA	NA
GTEX-1IDJH-0826-SM-CE6SY	Normal(n=712)	3.45549	NA	NA
GTEX-1IDJU-1626-SM-CJI4B	Normal(n=712)	3.33942	NA	NA
GTEX-1IE54-0926-SM-A9G2Y	Normal(n=712)	3.854	NA	NA
GTEX-1IGQW-0626-SM-C1YR9	Normal(n=712)	4.14078	NA	NA
GTEX-1IKJJ-1026-SM-A96SQ	Normal(n=712)	3.38709	NA	NA
GTEX-1IKOE-0926-SM-ARU7X	Normal(n=712)	3.35191	NA	NA
GTEX-1IKOH-0626-SM-CJI35	Normal(n=712)	3.24367	NA	NA
GTEX-1IL2U-0826-SM-CL53Q	Normal(n=712)	3.63923	NA	NA
GTEX-1IL2V-0626-SM-ARU7S	Normal(n=712)	3.40095	NA	NA
GTEX-1IOXB-1026-SM-CJI4D	Normal(n=712)	3.29763	NA	NA
GTEX-1IY9M-1026-SM-A96TG	Normal(n=712)	3.53481	NA	NA
GTEX-1J1OQ-0526-SM-A9G2P	Normal(n=712)	3.89724	NA	NA
GTEX-1J1R8-0126-SM-CJI36	Normal(n=712)	2.94879	NA	NA
GTEX-1J8EW-1126-SM-A96T8	Normal(n=712)	3.64501	NA	NA
GTEX-1J8JJ-0726-SM-AHZ3E	Normal(n=712)	3.84699	NA	NA
GTEX-1J8Q3-0226-SM-C1YR4	Normal(n=712)	3.97361	NA	NA
GTEX-1J8QM-0726-SM-CE6RF	Normal(n=712)	3.14568	NA	NA
GTEX-1JJ6O-0626-SM-AHZ3H	Normal(n=712)	3.44758	NA	NA
GTEX-1JJE9-0226-SM-CY8HU	Normal(n=712)	3.24914	NA	NA
GTEX-1JJEA-0626-SM-D3L96	Normal(n=712)	3.60051	NA	NA
GTEX-1JK1U-0326-SM-CXZJH	Normal(n=712)	3.70819	NA	NA
GTEX-1JKYN-1126-SM-CGQG5	Normal(n=712)	3.73552	NA	NA
GTEX-1JKYR-0826-SM-ARU8L	Normal(n=712)	3.45694	NA	NA
GTEX-1JMLX-0826-SM-CNNPP	Normal(n=712)	3.68145	NA	NA
GTEX-1JMPY-0126-SM-CJI39	Normal(n=712)	3.43709	NA	NA
GTEX-1JMPZ-0626-SM-CY8HY	Normal(n=712)	4.22419	NA	NA
GTEX-1JMQJ-2026-SM-CNPP9	Normal(n=712)	3.69042	NA	NA
GTEX-1JMQK-2126-SM-CY8I2	Normal(n=712)	3.69042	NA	NA
GTEX-1JMQL-0926-SM-CJI3F	Normal(n=712)	3.50589	NA	NA
GTEX-1JN6P-0626-SM-ARZN6	Normal(n=712)	3.42008	NA	NA
GTEX-1K2DA-1526-SM-CGQGQ	Normal(n=712)	3.67694	NA	NA
GTEX-1K2DU-0126-SM-E9TIU	Normal(n=712)	3.39862	NA	NA
GTEX-1K9T9-0826-SM-EAZ4X	Normal(n=712)	3.87283	NA	NA
GTEX-1KAFJ-0426-SM-DHXJH	Normal(n=712)	3.37851	NA	NA
GTEX-1KANC-0826-SM-D3LA8	Normal(n=712)	3.60763	NA	NA
GTEX-1KD4Q-1026-SM-CXZKJ	Normal(n=712)	3.97728	NA	NA
GTEX-1KD5A-0426-SM-D4P3X	Normal(n=712)	4.03826	NA	NA
GTEX-1KXAM-1726-SM-D3LAE	Normal(n=712)	3.76235	NA	NA
GTEX-1LB8K-0626-SM-D4P3Z	Normal(n=712)	3.67694	NA	NA
GTEX-1LBAC-0726-SM-D3L9U	Normal(n=712)	3.79286	NA	NA
GTEX-1LG7Y-0626-SM-DHXJM	Normal(n=712)	3.36961	NA	NA
GTEX-1LG7Z-0526-SM-D4P3Q	Normal(n=712)	3.93452	NA	NA
GTEX-1LGOU-0126-SM-EV79W	Normal(n=712)	4.18349	NA	NA
GTEX-1LGRB-1226-SM-CNNPS	Normal(n=712)	3.77505	NA	NA
GTEX-1LH75-0626-SM-DIPG3	Normal(n=712)	3.66107	NA	NA
GTEX-1LSVX-0726-SM-E9TJG	Normal(n=712)	3.57652	NA	NA
GTEX-1LVAM-0826-SM-EV79X	Normal(n=712)	3.48156	NA	NA
GTEX-1LVAN-0726-SM-CNNPF	Normal(n=712)	3.58976	NA	NA
GTEX-1M4P7-0626-SM-EVR51	Normal(n=712)	3.95699	NA	NA
GTEX-1MA7X-0926-SM-DIPEJ	Normal(n=712)	3.57168	NA	NA
GTEX-1MCC2-0526-SM-DHXJS	Normal(n=712)	3.25248	NA	NA
GTEX-1MGNQ-0726-SM-DPRYH	Normal(n=712)	3.46989	NA	NA
GTEX-1MJK2-0826-SM-DTXE8	Normal(n=712)	3.51728	NA	NA
GTEX-1MJK3-0326-SM-DTX96	Normal(n=712)	3.44122	NA	NA
GTEX-1MUQO-0726-SM-E9TJM	Normal(n=712)	3.21226	NA	NA
GTEX-1N5O9-1026-SM-DTX8Y	Normal(n=712)	3.48414	NA	NA
GTEX-1NUQO-0926-SM-DTXEX	Normal(n=712)	3.61706	NA	NA
GTEX-1NV5F-0726-SM-DTXEH	Normal(n=712)	3.79909	NA	NA
GTEX-1O97I-1026-SM-E76PI	Normal(n=712)	3.60051	NA	NA
GTEX-1O9I2-1226-SM-E6CQC	Normal(n=712)	3.66903	NA	NA
GTEX-1OFPY-1526-SM-DTX8R	Normal(n=712)	3.56316	NA	NA
GTEX-1OJC3-0626-SM-E8VMO	Normal(n=712)	4.32625	NA	NA
GTEX-1OJC4-0526-SM-E6CQV	Normal(n=712)	3.2966	NA	NA
GTEX-1P4AB-1126-SM-DTX94	Normal(n=712)	3.99277	NA	NA
GTEX-1PBJI-0726-SM-EXUSQ	Normal(n=712)	3.45088	NA	NA
GTEX-1PBJJ-1926-SM-DTX8T	Normal(n=712)	3.80012	NA	NA
GTEX-1PDJ9-0826-SM-E76PS	Normal(n=712)	3.32898	NA	NA
GTEX-1PFEY-0226-SM-EVR3M	Normal(n=712)	3.79494	NA	NA
GTEX-1PIGE-0726-SM-DPRZD	Normal(n=712)	3.48671	NA	NA
GTEX-1PIIG-2026-SM-EVR43	Normal(n=712)	3.16221	NA	NA
GTEX-1PPGY-1426-SM-EVR3R	Normal(n=712)	3.90785	NA	NA
GTEX-1PPH8-0926-SM-DTX9U	Normal(n=712)	3.09542	NA	NA
GTEX-1PWST-0726-SM-EWRMO	Normal(n=712)	3.98094	NA	NA
GTEX-1QAET-0226-SM-EVR3T	Normal(n=712)	3.89821	NA	NA
GTEX-1QCLY-0826-SM-DTX8A	Normal(n=712)	3.43389	NA	NA
GTEX-1QCLZ-0626-SM-E6CR2	Normal(n=712)	3.87676	NA	NA
GTEX-1QEPI-0726-SM-E76QG	Normal(n=712)	3.35318	NA	NA
GTEX-1QMI2-0826-SM-EXUT4	Normal(n=712)	3.49185	NA	NA
GTEX-1QP28-0626-SM-E76P5	Normal(n=712)	3.69377	NA	NA
GTEX-1QP2A-0626-SM-DTX9C	Normal(n=712)	3.27023	NA	NA
GTEX-1QP66-0326-SM-DTX7V	Normal(n=712)	3.51096	NA	NA
GTEX-1QP67-0326-SM-EVR45	Normal(n=712)	3.77821	NA	NA
GTEX-1QP6S-2526-SM-DTX9Z	Normal(n=712)	3.61353	NA	NA
GTEX-1QP9N-0126-SM-DPRZS	Normal(n=712)	3.42196	NA	NA
GTEX-1QPFJ-0626-SM-DTX7Y	Normal(n=712)	3.49185	NA	NA
GTEX-1QW4Y-0226-SM-EAZ3U	Normal(n=712)	3.87676	NA	NA
GTEX-1R46S-0426-SM-EVR48	Normal(n=712)	3.87774	NA	NA
GTEX-1R9JW-0226-SM-EVR4K	Normal(n=712)	3.9222	NA	NA
GTEX-1R9K4-0726-SM-EWRN2	Normal(n=712)	3.9241	NA	NA
GTEX-1R9K5-0726-SM-EAZ4E	Normal(n=712)	3.90881	NA	NA
GTEX-1R9PM-0226-SM-DPRY7	Normal(n=712)	3.82477	NA	NA
GTEX-1RAZA-0826-SM-EAZ4I	Normal(n=712)	3.75489	NA	NA
GTEX-1RAZQ-0926-SM-EAZ4Q	Normal(n=712)	3.62293	NA	NA
GTEX-1RAZR-1126-SM-E6CRC	Normal(n=712)	4.0798	NA	NA
GTEX-1RAZS-1026-SM-E9TID	Normal(n=712)	3.70598	NA	NA
GTEX-1RDX4-0926-SM-E9U6D	Normal(n=712)	4.39643	NA	NA
GTEX-1RMOY-0126-SM-EWRNN	Normal(n=712)	3.9364	NA	NA
GTEX-1RNSC-1126-SM-E9TIP	Normal(n=712)	3.49825	NA	NA
GTEX-1RQEC-1026-SM-EVR5B	Normal(n=712)	3.97911	NA	NA
GTEX-1RQED-0926-SM-EWRNZ	Normal(n=712)	3.48285	NA	NA
GTEX-1S5ZU-0726-SM-EWROH	Normal(n=712)	4.00899	NA	NA
GTEX-1S83E-0726-SM-EV7B6	Normal(n=712)	3.57652	NA	NA
GTEX-N7MS-2326-SM-2HMLD	Normal(n=712)	3.79805	NA	NA
GTEX-NFK9-0726-SM-2HMJW	Normal(n=712)	3.36667	NA	NA
GTEX-O5YV-1526-SM-EV799	Normal(n=712)	4.19928	NA	NA
GTEX-OHPK-2626-SM-2HMK9	Normal(n=712)	3.30393	NA	NA
GTEX-OHPL-2626-SM-2HMJA	Normal(n=712)	3.68706	NA	NA
GTEX-OHPM-2626-SM-33HC5	Normal(n=712)	4.0321	NA	NA
GTEX-OIZF-2626-SM-7P8QZ	Normal(n=712)	3.34568	NA	NA
GTEX-OIZG-0226-SM-2TC5L	Normal(n=712)	3.27798	NA	NA
GTEX-OIZI-0726-SM-2XCEI	Normal(n=712)	3.92029	NA	NA
GTEX-OOBJ-2626-SM-2I3F6	Normal(n=712)	3.85	NA	NA
GTEX-OXRK-0626-SM-2HMJ5	Normal(n=712)	3.48929	NA	NA
GTEX-OXRL-2626-SM-2I3F1	Normal(n=712)	3.15753	NA	NA
GTEX-OXRN-1526-SM-E6CHM	Normal(n=712)	3.99277	NA	NA
GTEX-OXRO-1226-SM-48TDL	Normal(n=712)	4.45746	NA	NA
GTEX-OXRP-0326-SM-33HBJ	Normal(n=712)	3.94953	NA	NA
GTEX-P44G-0626-SM-2I5EO	Normal(n=712)	3.44692	NA	NA
GTEX-P4PQ-2626-SM-33HC9	Normal(n=712)	3.61471	NA	NA
GTEX-P4QS-2626-SM-2I3EV	Normal(n=712)	3.74201	NA	NA
GTEX-P4QT-2626-SM-2I3FM	Normal(n=712)	3.20586	NA	NA
GTEX-P78B-0526-SM-2I5F7	Normal(n=712)	3.44917	NA	NA
GTEX-PLZ4-1226-SM-2I5FE	Normal(n=712)	3.63343	NA	NA
GTEX-POYW-0826-SM-2XCEM	Normal(n=712)	4.25927	NA	NA
GTEX-PWCY-2326-SM-2I3EQ	Normal(n=712)	3.43749	NA	NA
GTEX-PWN1-2626-SM-2I3FH	Normal(n=712)	3.59455	NA	NA
GTEX-PX3G-2626-SM-2I3EG	Normal(n=712)	3.82273	NA	NA
GTEX-Q2AG-0826-SM-2HMKF	Normal(n=712)	3.94017	NA	NA
GTEX-Q2AH-0726-SM-2I3EA	Normal(n=712)	3.56438	NA	NA
GTEX-Q2AI-0326-SM-2I3EK	Normal(n=712)	3.6017	NA	NA
GTEX-Q734-0526-SM-2I3EH	Normal(n=712)	3.78869	NA	NA
GTEX-QDT8-1226-SM-EVR35	Normal(n=712)	3.90689	NA	NA
GTEX-QDVJ-0226-SM-2I5FV	Normal(n=712)	3.21459	NA	NA
GTEX-QDVN-0626-SM-2I3FP	Normal(n=712)	3.39397	NA	NA
GTEX-QEG5-0826-SM-2I5GF	Normal(n=712)	3.86592	NA	NA
GTEX-QEL4-0726-SM-3GIJ5	Normal(n=712)	3.8268	NA	NA
GTEX-QLQ7-0726-SM-2I5G2	Normal(n=712)	3.88362	NA	NA
GTEX-QV31-0726-SM-3GAEG	Normal(n=712)	3.82782	NA	NA
GTEX-QV44-0826-SM-2S1RG	Normal(n=712)	3.96162	NA	NA
GTEX-QXCU-0326-SM-2TC63	Normal(n=712)	3.56438	NA	NA
GTEX-R3RS-0726-SM-3GIJR	Normal(n=712)	3.46467	NA	NA
GTEX-R53T-0526-SM-3GADL	Normal(n=712)	3.92505	NA	NA
GTEX-R55C-0626-SM-2TF4Q	Normal(n=712)	3.68032	NA	NA
GTEX-R55E-0826-SM-2TC5M	Normal(n=712)	3.6565	NA	NA
GTEX-R55G-0726-SM-2TC6J	Normal(n=712)	3.85	NA	NA
GTEX-REY6-0526-SM-2TF5M	Normal(n=712)	4.31904	NA	NA
GTEX-RM2N-0526-SM-2TF4N	Normal(n=712)	3.99095	NA	NA
GTEX-RN5K-2826-SM-EZ6L3	Normal(n=712)	3.95327	NA	NA
GTEX-RN64-0626-SM-2TC5V	Normal(n=712)	3.62644	NA	NA
GTEX-RNOR-0926-SM-2TF56	Normal(n=712)	3.82069	NA	NA
GTEX-RTLS-0626-SM-5SI7Z	Normal(n=712)	3.37393	NA	NA
GTEX-RU1J-0226-SM-2TF5Y	Normal(n=712)	3.55827	NA	NA
GTEX-RU72-0126-SM-2TF6Z	Normal(n=712)	3.51475	NA	NA
GTEX-RUSQ-1026-SM-2TF6V	Normal(n=712)	3.66448	NA	NA
GTEX-RVPV-1226-SM-2TF73	Normal(n=712)	3.51602	NA	NA
GTEX-RWS6-0626-SM-2XCAS	Normal(n=712)	3.58496	NA	NA
GTEX-RWSA-0826-SM-2XCBF	Normal(n=712)	3.31918	NA	NA
GTEX-S32W-0726-SM-2XCBL	Normal(n=712)	3.38695	NA	NA
GTEX-S341-0226-SM-D4P1Y	Normal(n=712)	3.63575	NA	NA
GTEX-S7SE-0726-SM-2XCD7	Normal(n=712)	4.0054	NA	NA
GTEX-S7SF-0226-SM-5SI7H	Normal(n=712)	3.63575	NA	NA
GTEX-SE5C-0726-SM-4BRWY	Normal(n=712)	3.41792	NA	NA
GTEX-SIU8-0626-SM-2XCDN	Normal(n=712)	4.02768	NA	NA
GTEX-SJXC-0726-SM-2XCFJ	Normal(n=712)	4.37016	NA	NA
GTEX-SN8G-1526-SM-4DM79	Normal(n=712)	4.0009	NA	NA
GTEX-SNOS-0226-SM-32PLR	Normal(n=712)	3.11919	NA	NA
GTEX-SUCS-0226-SM-32PLQ	Normal(n=712)	3.80116	NA	NA
GTEX-T2IS-0626-SM-32QP6	Normal(n=712)	4.03738	NA	NA
GTEX-T5JW-1226-SM-3GACY	Normal(n=712)	3.67356	NA	NA
GTEX-T6MN-0626-SM-32PM9	Normal(n=712)	3.55336	NA	NA
GTEX-T6MO-0226-SM-32QOL	Normal(n=712)	3.46074	NA	NA
GTEX-T8EM-0226-SM-3DB7C	Normal(n=712)	3.7845	NA	NA
GTEX-TKQ1-0126-SM-33HB3	Normal(n=712)	3.59932	NA	NA
GTEX-TMMY-0826-SM-33HB9	Normal(n=712)	3.64847	NA	NA
GTEX-TSE9-0626-SM-3DB8B	Normal(n=712)	3.86096	NA	NA
GTEX-U3ZH-0226-SM-3DB7B	Normal(n=712)	3.6565	NA	NA
GTEX-U3ZM-0126-SM-3DB8M	Normal(n=712)	3.60051	NA	NA
GTEX-U3ZN-0326-SM-3DB86	Normal(n=712)	4.30305	NA	NA
GTEX-U412-0726-SM-EVR2Y	Normal(n=712)	4.29278	NA	NA
GTEX-U4B1-0626-SM-3DB8L	Normal(n=712)	3.7148	NA	NA
GTEX-U8T8-2326-SM-3DB96	Normal(n=712)	3.60881	NA	NA
GTEX-UJMC-0326-SM-3GAE2	Normal(n=712)	4.14893	NA	NA
GTEX-V1D1-0926-SM-4JBHQ	Normal(n=712)	3.61117	NA	NA
GTEX-V955-0426-SM-3GAEL	Normal(n=712)	3.82782	NA	NA
GTEX-VJYA-0426-SM-3GIJK	Normal(n=712)	3.94017	NA	NA
GTEX-VUSG-0426-SM-3GIKD	Normal(n=712)	4.03474	NA	NA
GTEX-W5WG-1426-SM-4KKZP	Normal(n=712)	3.488	NA	NA
GTEX-W5X1-0426-SM-3GILB	Normal(n=712)	3.79805	NA	NA
GTEX-WEY5-0526-SM-3GIKZ	Normal(n=712)	3.81967	NA	NA
GTEX-WFG7-0326-SM-DKPO8	Normal(n=712)	3.82171	NA	NA
GTEX-WFG8-0426-SM-3GILD	Normal(n=712)	3.75275	NA	NA
GTEX-WFJO-0226-SM-3GIKW	Normal(n=712)	3.65076	NA	NA
GTEX-WH7G-0526-SM-3NMBI	Normal(n=712)	3.55949	NA	NA
GTEX-WHPG-0226-SM-3NMB9	Normal(n=712)	3.70044	NA	NA
GTEX-WHSB-1626-SM-3LK6J	Normal(n=712)	3.47768	NA	NA
GTEX-WHSE-0626-SM-4RGNF	Normal(n=712)	4.08491	NA	NA
GTEX-WK11-0926-SM-3NMAU	Normal(n=712)	4.05485	NA	NA
GTEX-WL46-0126-SM-3TW8I	Normal(n=712)	3.49825	NA	NA
GTEX-WOFL-0726-SM-3MJG4	Normal(n=712)	3.53854	NA	NA
[truncated: 89 more rows]

## Sheet: ZCCHC12
rownames(datas)	Type	values	times	status
[truncated: 1,222 more rows]

[truncated: 4 more sheets: ZCCHC14, ZCCHC17, ZCCHC18, ZCCHC24]
