# Supplementary material for: Differential expression of zinc finger CCHC-type superfamily proteins in thyroid carcinoma and their associations with tumor immunity
Source: Thyroid Res. 2023 Oct 17;16:42. doi: 10.1186/s13044-023-00185-1 (PMC10580525; doi:10.1186/s13044-023-00185-1)
Supplement: Supplementary file 6 — Supplementary Material 6: Table S6. Association of the ZCCHC gene family with THCA survival and staging [file 13044_2023_185_MOESM6_ESM.xlsx]

## Sheet: Sheet1
Table S7. Relevance of the ZCCHC gene family in THCA to immunity
Genes	Gene1	Gene2	cor	p.value	pstar
cor.result.rho	ZCCHC2	B cell	0.357056	1.01e-16	**
cor.result.rho1	ZCCHC2	T cell CD4+	-0.179844	4.57e-05	**
cor.result.rho2	ZCCHC2	T cell CD8+	0.700701	3.21e-76	**
cor.result.rho3	ZCCHC2	Neutrophil	0.442904	8.08e-26	**
cor.result.rho4	ZCCHC2	Macrophage	0.676248	3.63e-69	**
cor.result.rho5	ZCCHC2	Myeloid dendritic cell	0.276314	2.35e-10	**
cor.result.rho6	ZCCHC3	B cell	0.0249066	0.575431
cor.result.rho11	ZCCHC3	T cell CD4+	-0.201673	4.62e-06	**
cor.result.rho21	ZCCHC3	T cell CD8+	0.363898	2.37e-17	**
cor.result.rho31	ZCCHC3	Neutrophil	-0.173726	8.29e-05	**
cor.result.rho41	ZCCHC3	Macrophage	0.381317	5e-19	**
cor.result.rho51	ZCCHC3	Myeloid dendritic cell	-0.257463	3.9e-09	**
cor.result.rho7	ZCCHC4	B cell	0.322006	1.02e-13	**
cor.result.rho12	ZCCHC4	T cell CD4+	-0.195867	8.71e-06	**
cor.result.rho22	ZCCHC4	T cell CD8+	0.60855	8.69e-53	**
cor.result.rho32	ZCCHC4	Neutrophil	0.158758	0.000327882	**
cor.result.rho42	ZCCHC4	Macrophage	0.572727	1.29e-45	**
cor.result.rho52	ZCCHC4	Myeloid dendritic cell	0.0456526	0.304441
cor.result.rho8	ZCCHC7	B cell	0.237447	6.09e-08	**
cor.result.rho13	ZCCHC7	T cell CD4+	-0.238819	5.08e-08	**
cor.result.rho23	ZCCHC7	T cell CD8+	0.597197	2.04e-50	**
cor.result.rho33	ZCCHC7	Neutrophil	0.122528	0.0056877	**
cor.result.rho43	ZCCHC7	Macrophage	0.473344	9.97e-30	**
cor.result.rho53	ZCCHC7	Myeloid dendritic cell	-0.00827151	0.852465
cor.result.rho9	ZCCHC8	B cell	0.225938	2.65e-07	**
cor.result.rho14	ZCCHC8	T cell CD4+	-0.244327	2.43e-08	**
cor.result.rho24	ZCCHC8	T cell CD8+	0.586793	2.52e-48	**
cor.result.rho34	ZCCHC8	Neutrophil	0.0937508	0.0346448	*
cor.result.rho44	ZCCHC8	Macrophage	0.546378	7.09e-41	**
cor.result.rho54	ZCCHC8	Myeloid dendritic cell	-0.0339209	0.445539
cor.result.rho10	ZCCHC9	B cell	0.113331	0.0105792	*
cor.result.rho15	ZCCHC9	T cell CD4+	-0.0693333	0.118589
cor.result.rho25	ZCCHC9	T cell CD8+	0.378582	9.31e-19	**
cor.result.rho35	ZCCHC9	Neutrophil	0.147052	0.000886395	**
cor.result.rho45	ZCCHC9	Macrophage	0.388504	9.5e-20	**
cor.result.rho55	ZCCHC9	Myeloid dendritic cell	0.0812901	0.0671448
cor.result.rho16	ZCCHC10	B cell	0.289108	3.08e-11	**
cor.result.rho17	ZCCHC10	T cell CD4+	-0.171525	0.000102207	**
cor.result.rho26	ZCCHC10	T cell CD8+	0.577296	1.76e-46	**
cor.result.rho36	ZCCHC10	Neutrophil	0.197898	6.99e-06	**
cor.result.rho46	ZCCHC10	Macrophage	0.537178	2.56e-39	**
cor.result.rho56	ZCCHC10	Myeloid dendritic cell	0.0816152	0.0660551
cor.result.rho18	ZCCHC12	B cell	0.0705089	0.112456
cor.result.rho19	ZCCHC12	T cell CD4+	-0.0918427	0.0385175	*
cor.result.rho27	ZCCHC12	T cell CD8+	0.29552	1.07e-11	**
cor.result.rho37	ZCCHC12	Neutrophil	0.162232	0.000240775	**
cor.result.rho47	ZCCHC12	Macrophage	0.31875	1.85e-13	**
cor.result.rho57	ZCCHC12	Myeloid dendritic cell	0.13608	0.00211329	**
cor.result.rho20	ZCCHC14	B cell	0.275269	2.77e-10	**
cor.result.rho110	ZCCHC14	T cell CD4+	-0.163116	0.000222363	**
cor.result.rho28	ZCCHC14	T cell CD8+	0.666589	1.45e-66	**
cor.result.rho38	ZCCHC14	Neutrophil	0.499317	2.18e-33	**
cor.result.rho48	ZCCHC14	Macrophage	0.603461	1.03e-51	**
cor.result.rho58	ZCCHC14	Myeloid dendritic cell	0.348072	6.48e-16	**
cor.result.rho29	ZCCHC17	B cell	-0.0847801	0.0561875
cor.result.rho111	ZCCHC17	T cell CD4+	-0.296972	8.4e-12	**
cor.result.rho210	ZCCHC17	T cell CD8+	0.239311	4.76e-08	**
cor.result.rho39	ZCCHC17	Neutrophil	-0.239689	4.53e-08	**
cor.result.rho49	ZCCHC17	Macrophage	0.129094	0.00356061	**
cor.result.rho59	ZCCHC17	Myeloid dendritic cell	-0.263432	1.64e-09	**
cor.result.rho30	ZCCHC18	B cell	0.212604	1.33e-06	**
cor.result.rho112	ZCCHC18	T cell CD4+	0.510176	5.17e-35	**
cor.result.rho211	ZCCHC18	T cell CD8+	-0.0176685	0.691163
cor.result.rho310	ZCCHC18	Neutrophil	0.28364	7.45e-11	**
cor.result.rho410	ZCCHC18	Macrophage	0.110051	0.0130704	*
cor.result.rho510	ZCCHC18	Myeloid dendritic cell	0.333589	1.14e-14	**
cor.result.rho40	ZCCHC24	B cell	0.302793	3.12e-12	**
cor.result.rho113	ZCCHC24	T cell CD4+	0.0516764	0.244977
cor.result.rho212	ZCCHC24	T cell CD8+	0.565003	3.51e-44	**
cor.result.rho311	ZCCHC24	Neutrophil	0.511202	3.61e-35	**
cor.result.rho411	ZCCHC24	Macrophage	0.578406	1.08e-46	**
cor.result.rho511	ZCCHC24	Myeloid dendritic cell	0.425639	9.02e-24	**
