# Supplementary material for: Differential expression of zinc finger CCHC-type superfamily proteins in thyroid carcinoma and their associations with tumor immunity
Source: Thyroid Res. 2023 Oct 17;16:42. doi: 10.1186/s13044-023-00185-1 (PMC10580525; doi:10.1186/s13044-023-00185-1)
Supplement: Supplementary file 7 — Supplementary Material 7: Table S7. Relevance of the ZCCHC gene family in THCA to immunity [file 13044_2023_185_MOESM7_ESM.xlsx]

## Sheet: Tumour stemness differences
Table S7. Tumor stemness differences in THCA and their correlation with ZCCHC12
TCGA-ET-A2N0-01	0.80267
TCGA-FE-A3PA-01	0.539654
TCGA-EM-A1YC-01	0.872974
TCGA-IM-A420-01	0.651241
TCGA-FY-A76V-01	0.404156
TCGA-EM-A2CR-01	0.689212
TCGA-EM-A3FO-01	0.591591
TCGA-EL-A3H7-01	0.519918
TCGA-KS-A4I5-01	0.505866
TCGA-MK-A84Z-01	0.56327
TCGA-EM-A4FM-01	0.566686
TCGA-BJ-A190-01	0.766393
TCGA-BJ-A0ZC-01	0.725177
TCGA-EM-A4FO-01	0.563369
TCGA-DJ-A2PO-01	0.627879
TCGA-EL-A3ZT-01	0.513873
TCGA-DJ-A3V9-01	0.464885
TCGA-ET-A3DV-01	0.775371
TCGA-FY-A3NN-01	0.759997
TCGA-DJ-A13O-01	0.673502
TCGA-EM-A1CW-01	0.766742
TCGA-E8-A436-01	0.572329
TCGA-DJ-A1QO-01	0.636512
TCGA-E3-A3E2-01	0.747637
TCGA-E8-A416-01	0.523747
TCGA-EL-A3GV-01	0.564336
TCGA-ET-A2N3-01	0.663011
TCGA-BJ-A2NA-01	0.616793
TCGA-DJ-A4V0-01	0.561881
TCGA-EL-A3CM-01	0.513431
TCGA-EM-A3O3-01	0.779999
TCGA-FY-A3TY-01	0.447068
TCGA-EL-A3T6-01	0.659678
TCGA-ET-A3BO-01	0.619694
TCGA-EM-A2OX-01	0.514008
TCGA-EL-A3D6-01	0.612975
TCGA-J8-A3YF-01	0.616948
TCGA-CE-A481-01	0.464145
TCGA-E8-A419-01	0.666787
TCGA-ET-A25G-01	0.658453
TCGA-E8-A438-01	0.465675
TCGA-E3-A3E0-01	0.649367
TCGA-DE-A0Y3-01	0.665447
TCGA-EM-A3FR-01	0.657515
TCGA-ET-A3DS-01	0.714477
TCGA-DJ-A4UL-01	0.693451
TCGA-EM-A2CK-01	0.663684
TCGA-J8-A3O1-01	0.797762
TCGA-FE-A237-01	0.58072
TCGA-BJ-A3PT-01	0.605807
TCGA-EM-A3O8-01	0.672856
TCGA-H2-A2K9-01	0.585333
TCGA-DJ-A2Q7-01	0.629384
TCGA-EL-A3CT-01	0.551905
TCGA-DJ-A1QM-01	0.481075
TCGA-H2-A3RH-01	0.564114
TCGA-IM-A41Z-01	0.803374
TCGA-EM-A22O-01	0.817447
TCGA-DJ-A4UR-01	0.494504
TCGA-IM-A3EB-01	0.720412
TCGA-EL-A3ZN-01	0.43037
TCGA-FK-A3SH-01	0.601955
TCGA-EL-A3ZS-01	0.489535
TCGA-EL-A3GR-01	0.401701
TCGA-DE-A3KN-01	0.43268
TCGA-EM-A3AI-01	0.667726
TCGA-ET-A39R-01	0.638631
TCGA-DJ-A13X-01	0.583323
TCGA-ET-A25O-01	0.761375
TCGA-EM-A1YD-01	0.493184
TCGA-FE-A22Z-01	0.589885
TCGA-BJ-A2N8-01	0.720077
TCGA-DJ-A13W-01	0.588735
TCGA-EL-A3N2-01	0.610787
TCGA-EM-A4FF-01	0.59955
TCGA-EL-A3CU-01	0.597814
TCGA-J8-A3YD-01	0.631301
TCGA-FY-A3YR-01	0.610719
TCGA-DJ-A2PV-01	0.441421
TCGA-KS-A4I3-01	0.646206
TCGA-EM-A1CV-01	0.66794
TCGA-BJ-A3PR-01	0.779541
TCGA-EM-A3O6-01	0.731118
TCGA-BJ-A45J-01	0.529369
TCGA-BJ-A28V-01	0.621368
TCGA-EM-A3FP-01	0.668729
TCGA-EM-A3SY-01	0.992558
TCGA-FK-A3S3-01	0.552153
TCGA-FY-A3NP-01	0.735016
TCGA-E8-A242-01	0.574321
TCGA-FY-A3BL-01	0.710222
TCGA-EL-A3CR-01	0.47377
TCGA-DJ-A13P-01	0.600917
TCGA-FE-A239-01	0.691102
TCGA-DE-A69K-01	0.566914
TCGA-E8-A418-01	0.823131
TCGA-EL-A3D0-01	0.529421
TCGA-EL-A3D4-01	0.467037
TCGA-MK-A4N6-01	0.570071
TCGA-E8-A437-01	0.541373
TCGA-EM-A3FL-01	0.857236
TCGA-J8-A3YH-01	0.593437
TCGA-E8-A433-01	0.608262
TCGA-EL-A4K9-01	0.531295
TCGA-E8-A2EA-01	0.647658
TCGA-ET-A3BU-01	0.52853
TCGA-EL-A4K0-01	0.441702
TCGA-EM-A2CM-01	0.801681
TCGA-EL-A4K1-01	0.594602
TCGA-EL-A3CL-01	0.554404
TCGA-DJ-A2PR-01	0.600204
TCGA-DJ-A2QA-01	0.678597
TCGA-DJ-A3VJ-01	0.530811
TCGA-ET-A3DO-01	0.664069
TCGA-EM-A2CN-01	0.66024
TCGA-DJ-A3UV-01	0.467556
TCGA-J8-A3O2-06	0.648544
TCGA-IM-A4EB-01	0.541805
TCGA-EM-A3OA-01	0.825711
TCGA-EL-A3MW-01	0.660238
TCGA-FE-A234-01	0.630989
TCGA-EM-A2CQ-01	0.681978
TCGA-FY-A40K-01	0.528889
TCGA-ET-A40P-01	0.580855
TCGA-DJ-A1QF-01	0.597578
TCGA-EL-A4KH-01	0.63911
TCGA-ET-A3BV-01	0.387376
TCGA-CE-A27D-01	0.665937
TCGA-EL-A4KI-01	0.734153
TCGA-KS-A4I7-01	0.555525
TCGA-EM-A3SZ-01	0.723384
TCGA-DJ-A3VB-01	0.662216
TCGA-DJ-A2PP-01	0.768275
TCGA-DJ-A4V4-01	0.609383
TCGA-EL-A4KG-01	0.657602
TCGA-FE-A3PD-01	0.605736
TCGA-ET-A40R-01	0.594136
TCGA-EM-A4FK-01	0.793357
TCGA-DJ-A2PU-01	0.588967
TCGA-J8-A3YG-01	0.555359
TCGA-BJ-A2N9-01	0.928593
TCGA-EM-A22Q-01	0.739937
TCGA-FE-A23A-01	0.632634
TCGA-EL-A3T2-01	0.605575
TCGA-ET-A39K-01	0.643227
TCGA-H2-A26U-01	0.527088
TCGA-EM-A3AO-01	0.599521
TCGA-BJ-A45H-01	0.561613
TCGA-J8-A3O0-01	0.59066
TCGA-EM-A2P2-01	0.589884
TCGA-IM-A3ED-01	0.56714
TCGA-BJ-A18Y-01	0.567163
TCGA-ET-A40S-01	0.668638
TCGA-EL-A4K7-01	0.722203
TCGA-EL-A3GZ-01	0.582902
TCGA-BJ-A0ZJ-01	0.638684
TCGA-BJ-A0ZF-01	0.688225
TCGA-FE-A232-01	0.610642
TCGA-DJ-A3V4-01	0.623993
TCGA-DJ-A3UP-01	0.625325
TCGA-DJ-A1QN-01	0.591928
TCGA-EM-A3AJ-01	0.646547
TCGA-EM-A1YA-01	0.846347
TCGA-FY-A3R8-01	0.653938
TCGA-BJ-A45K-01	0.477141
TCGA-DJ-A3V2-01	0.670168
TCGA-J8-A3O2-01	0.551061
TCGA-ET-A3BN-01	0.534788
TCGA-DJ-A3UU-01	0.519875
TCGA-DJ-A3UQ-01	0.523917
TCGA-DJ-A3V3-01	0.558387
TCGA-FY-A3R9-01	0.743958
TCGA-KS-A41J-01	0.777671
TCGA-EL-A4K2-01	0.578267
TCGA-FY-A3WA-01	0.624354
TCGA-DJ-A13S-01	0.757025
TCGA-EM-A2P1-06	0.696096
TCGA-DJ-A3US-01	0.6179
TCGA-ET-A2N4-01	0.645696
TCGA-ET-A39N-01	0.785395
TCGA-EM-A4FV-01	0.624397
TCGA-BJ-A0ZA-01	0.709775
TCGA-BJ-A0Z0-01	0.729824
TCGA-DJ-A4V5-01	0.521521
TCGA-EL-A3H5-01	0.425195
TCGA-EL-A3T9-01	0.520785
TCGA-J8-A42S-01	0.457984
TCGA-EM-A3FM-01	0.680333
TCGA-ET-A40T-01	0.47938
TCGA-J8-A4HW-01	0.539619
TCGA-ET-A25J-01	0.701622
TCGA-BJ-A28R-01	0.627826
TCGA-BJ-A3F0-01	0.667516
TCGA-EL-A3H2-01	0.776912
TCGA-E3-A3E1-01	0.699708
TCGA-FK-A4UB-01	0.497894
TCGA-QD-A8IV-01	0.639379
TCGA-DJ-A2QC-01	0.656773
TCGA-EL-A3CN-01	0.631343
TCGA-DJ-A3UM-01	0.546162
TCGA-BJ-A291-01	0.632854
TCGA-EL-A3GY-01	0.603205
TCGA-DJ-A2PW-01	0.590846
TCGA-EM-A2CS-01	0.526178
TCGA-EL-A3ZM-01	0.690858
TCGA-E8-A417-01	0.704439
TCGA-EL-A3MZ-01	0.588044
TCGA-FE-A235-01	0.515786
TCGA-CE-A483-01	0.681736
TCGA-BJ-A45C-01	0.57619
TCGA-KS-A41F-01	0.803633
TCGA-DJ-A3V0-01	0.520949
TCGA-ET-A39S-01	0.533338
TCGA-EL-A3TB-01	0.626668
TCGA-E8-A432-01	0.549312
TCGA-ET-A3BT-01	0.673185
TCGA-DJ-A3VL-01	0.606036
TCGA-ET-A25K-01	0.47069
TCGA-ET-A3BS-01	0.716012
TCGA-BJ-A45G-01	0.594302
TCGA-H2-A421-01	0.587359
TCGA-DE-A0XZ-01	0.570608
TCGA-BJ-A45I-01	0.595925
TCGA-KS-A41I-01	0.585337
TCGA-DJ-A2PZ-01	0.653546
TCGA-DJ-A3V7-01	0.688354
TCGA-EL-A3GO-01	0.656007
TCGA-EM-A2CL-01	0.701876
TCGA-MK-A4N7-01	0.573039
TCGA-DJ-A2Q4-01	0.609326
TCGA-EL-A3T7-01	0.549539
TCGA-DJ-A3UR-01	0.620686
TCGA-CE-A13K-01	0.469111
TCGA-J8-A4HY-01	0.737608
TCGA-DJ-A3V5-01	0.574264
TCGA-DJ-A1QQ-01	0.503945
TCGA-EL-A3H3-01	0.802902
TCGA-DJ-A4UP-01	0.519056
TCGA-DE-A7U5-01	0.462596
TCGA-EL-A4K6-01	0.677727
TCGA-EL-A3MY-01	0.471318
TCGA-DJ-A3VA-01	0.618804
TCGA-DJ-A4UT-01	0.465932
TCGA-ET-A25I-01	0.743828
TCGA-BJ-A45E-01	0.734949
TCGA-E8-A3X7-01	0.64592
TCGA-DJ-A1QH-01	0.636766
TCGA-BJ-A0ZB-01	0.689683
TCGA-BJ-A3PU-01	0.786991
TCGA-EM-A2CT-01	0.789935
TCGA-BJ-A192-01	0.758218
TCGA-E8-A414-01	0.442788
TCGA-FY-A3ON-01	0.529877
TCGA-BJ-A28W-01	0.930901
TCGA-EL-A3CX-01	0.749817
TCGA-DJ-A4V2-01	0.584582
TCGA-ET-A39M-01	0.646688
TCGA-DJ-A3VM-01	0.736024
TCGA-BJ-A28S-01	0.622359
TCGA-FK-A3SB-01	0.506948
TCGA-H2-A422-01	0.634916
TCGA-DJ-A3UT-01	0.639502
TCGA-BJ-A0Z5-01	0.737558
TCGA-EM-A4FN-01	0.702709
TCGA-BJ-A4O9-01	0.811489
TCGA-FK-A3SD-01	0.711072
TCGA-FY-A40L-01	0.622609
TCGA-ET-A3DW-01	0.747353
TCGA-FY-A4B0-01	0.675728
TCGA-ET-A2MZ-01	0.621926
TCGA-E8-A2JQ-01	0.637767
TCGA-DJ-A3VF-01	0.47133
TCGA-ET-A39L-01	0.571002
TCGA-EM-A3AP-01	0.564496
TCGA-MK-A4N9-01	0.523155
TCGA-EM-A22I-01	0.577379
TCGA-DJ-A2PN-01	0.557508
TCGA-E3-A3DY-01	0.687473
TCGA-DJ-A3VD-01	0.521894
TCGA-DJ-A2Q3-01	0.610005
TCGA-ET-A3DP-01	0.484665
TCGA-L6-A4EU-01	0.598068
TCGA-EL-A4JW-01	0.559394
TCGA-E8-A415-01	0.617457
TCGA-BJ-A3EZ-01	0.722973
TCGA-ET-A3DU-01	0.62971
TCGA-DJ-A3UZ-01	0.560327
TCGA-FK-A3SE-01	0.558118
TCGA-DJ-A2PY-01	0.609435
TCGA-DE-A69J-01	0.656322
TCGA-EL-A3GP-01	0.532921
TCGA-DJ-A3UO-01	0.591552
TCGA-EL-A4K4-01	0.474099
TCGA-ET-A39I-01	0.665659
TCGA-DE-A4MB-01	0.539445
TCGA-EL-A3CZ-01	0.644805
TCGA-DJ-A1QG-01	0.767332
TCGA-GE-A2C6-01	0.494305
TCGA-DJ-A3UN-01	0.624333
TCGA-BJ-A0YZ-01	0.633761
TCGA-EL-A3ZP-01	0.492235
TCGA-J8-A3YE-01	0.793171
TCGA-DJ-A13T-01	0.58989
TCGA-EM-A3FQ-01	0.606385
TCGA-DE-A4MD-06	0.640044
TCGA-EL-A3CP-01	0.54195
TCGA-DJ-A3UY-01	0.538908
TCGA-EM-A3O7-01	0.641411
TCGA-FE-A230-01	0.67581
TCGA-EL-A3H1-01	0.635574
TCGA-IM-A3U2-01	0.613294
TCGA-DJ-A2PS-01	0.598367
TCGA-EM-A2CU-01	0.48581
TCGA-EM-A1CU-01	0.5432
TCGA-ET-A4KN-01	0.740468
TCGA-ET-A40Q-01	0.64345
TCGA-EL-A3ZH-01	0.591306
TCGA-ET-A3BQ-01	0.52404
TCGA-FY-A3R7-01	0.532041
TCGA-ET-A3BX-01	0.692308
TCGA-DJ-A2Q2-01	0.695997
TCGA-DJ-A1QE-01	0.604973
TCGA-EL-A3ZL-01	0.446422
TCGA-EM-A2CS-06	0.595098
TCGA-DJ-A13U-01	0.700542
TCGA-DJ-A2Q5-01	0.671948
TCGA-EL-A4JZ-01	0.464357
TCGA-EM-A22N-01	0.781203
TCGA-BJ-A2N7-01	0.683741
TCGA-J8-A4HW-06	0.535407
TCGA-DJ-A1QD-01	0.608956
TCGA-BJ-A0ZE-01	0.871765
TCGA-EM-A4FH-01	0.689257
TCGA-BJ-A45D-01	0.648541
TCGA-ET-A2MX-01	0.771108
TCGA-EL-A3CW-01	0.647007
TCGA-EM-A3AN-01	0.616081
TCGA-CE-A482-01	0.486196
TCGA-BJ-A0ZH-01	0.672333
TCGA-EM-A3ST-01	0.769522
TCGA-BJ-A290-01	0.697225
TCGA-FY-A3I5-01	0.647553
TCGA-FY-A4B4-01	0.540104
TCGA-FY-A4B3-01	0.386344
TCGA-FY-A3RA-01	0.646037
TCGA-DJ-A2QB-01	0.770371
TCGA-ET-A39P-01	0.66067
TCGA-DE-A0Y2-01	0.57301
TCGA-BJ-A0ZG-01	0.634058
TCGA-DJ-A2PQ-01	0.654471
TCGA-EL-A3ZR-01	0.656634
TCGA-DJ-A3VG-01	0.542473
TCGA-E8-A434-01	0.647724
TCGA-DJ-A2Q6-01	0.522827
TCGA-DJ-A2Q1-01	0.64283
TCGA-DJ-A13R-01	0.817061
TCGA-EM-A2P3-01	0.524731
TCGA-BJ-A28T-01	0.643971
TCGA-ET-A39O-01	0.673419
TCGA-EL-A3T1-01	0.599078
TCGA-EL-A3CO-01	0.433626
TCGA-E8-A44M-01	0.616659
TCGA-EM-A1CS-01	0.572286
TCGA-CE-A485-01	0.364581
TCGA-BJ-A0Z3-01	0.681333
TCGA-EL-A3ZK-01	0.546402
TCGA-EM-A3FJ-01	0.612205
TCGA-DJ-A4UQ-01	0.46658
TCGA-E8-A44K-01	0.618745
TCGA-KS-A4IC-01	0.651689
TCGA-EM-A1YB-01	0.94738
TCGA-EL-A3H8-01	0.586281
TCGA-BJ-A191-01	0.670295
TCGA-FY-A2QD-01	0.716938
TCGA-DJ-A2PT-01	0.636616
TCGA-FY-A40M-01	0.608353
TCGA-EM-A2OZ-01	0.727836
TCGA-BJ-A28X-01	0.586481
TCGA-EL-A3GW-01	0.710454
TCGA-BJ-A0Z2-01	0.705778
TCGA-EM-A3FQ-06	0.589514
TCGA-IM-A41Y-01	0.636912
TCGA-DJ-A13L-01	0.610164
TCGA-DO-A1JZ-01	0.547012
TCGA-ET-A25L-01	0.522224
TCGA-EL-A3MX-01	0.607205
TCGA-FY-A3W9-01	0.634769
TCGA-ET-A2MY-01	0.751584
TCGA-EL-A3T8-01	0.499077
TCGA-ET-A25R-01	0.640578
TCGA-DJ-A1QL-01	0.621183
TCGA-L6-A4ET-01	0.619523
TCGA-ET-A25P-01	0.644634
TCGA-E3-A3E5-01	0.585951
TCGA-EM-A3FK-01	0.604141
TCGA-EL-A3GU-01	0.451484
TCGA-H2-A3RI-01	0.685085
TCGA-DJ-A3V8-01	0.644507
TCGA-EM-A3SU-06	0.647128
TCGA-DJ-A2Q9-01	0.518906
TCGA-EL-A3CV-01	0.562468
TCGA-BJ-A45F-01	0.667018
TCGA-KS-A41L-01	0.69082
TCGA-J8-A3NZ-01	0.683419
TCGA-DO-A1K0-01	0.614711
TCGA-E3-A3DZ-01	0.67739
TCGA-EM-A3SX-01	0.551091
TCGA-DJ-A3VI-01	0.703509
TCGA-ET-A39J-01	0.530335
TCGA-DJ-A1QI-01	0.598178
TCGA-EL-A3N3-01	0.582778
TCGA-L6-A4EP-01	0.599098
TCGA-DJ-A13V-01	0.603522
TCGA-DE-A2OL-01	0.613454
TCGA-FY-A3I4-01	0.400265
TCGA-EM-A4FQ-01	0.621276
TCGA-EM-A2P1-01	0.715617
TCGA-EM-A2OV-01	0.825732
TCGA-EL-A3GQ-01	0.503247
TCGA-EL-A4JV-01	0.574747
TCGA-EL-A3T3-01	0.522427
TCGA-CE-A3ME-01	0.707711
TCGA-DJ-A3VK-01	0.59358
TCGA-EL-A3D1-01	0.585972
TCGA-BJ-A0Z9-01	0.736788
TCGA-E3-A3E3-01	0.713083
TCGA-KS-A4ID-01	0.699029
TCGA-FY-A40N-01	0.599325
TCGA-BJ-A18Z-01	0.49039
TCGA-EL-A3ZO-01	0.611937
TCGA-FE-A233-01	0.666071
TCGA-DJ-A4UW-01	0.414942
TCGA-DE-A4M8-01	0.557872
TCGA-EM-A3AL-01	0.613219
TCGA-J8-A3YH-06	0.582241
TCGA-FE-A236-01	0.680843
TCGA-4C-A93U-01	0.488752
TCGA-BJ-A28Z-01	0.58651
TCGA-EM-A3AK-01	0.549232
TCGA-EL-A3CS-01	0.690633
TCGA-FY-A3R6-01	0.570082
TCGA-KS-A4I9-01	0.631243
TCGA-EM-A2CJ-01	0.648206
TCGA-CE-A484-01	0.53567
TCGA-ET-A25M-01	0.545808
TCGA-DO-A2HM-01	0.655815
TCGA-DJ-A13M-01	0.770391
TCGA-ET-A3BP-01	0.680686
TCGA-EL-A3TA-01	0.526066
TCGA-EM-A22J-01	0.762616
TCGA-IM-A3U3-01	0.668922
TCGA-EM-A2CP-01	0.783059
TCGA-EM-A22L-01	0.709265
TCGA-DE-A4M9-01	0.558151
TCGA-DJ-A3UK-01	0.550415
TCGA-DE-A4MC-01	0.678302
TCGA-EL-A3T0-01	0.412862
TCGA-ET-A3BW-01	0.649749
TCGA-EL-A3ZQ-01	0.750251
TCGA-E8-A413-01	0.441568
TCGA-DJ-A3V6-01	0.607572
TCGA-EM-A22P-01	0.481315
TCGA-FK-A3SG-01	0.534422
TCGA-DJ-A2Q0-01	0.909891
TCGA-BJ-A4O8-01	0.483739
TCGA-EM-A22M-01	0.640986
TCGA-DE-A4MA-01	0.7452
TCGA-DE-A4MD-01	0.802522
TCGA-EL-A3CY-01	0.505177
TCGA-FE-A3PB-01	0.501151
TCGA-EM-A3AR-01	0.55479
TCGA-EM-A3OB-01	0.655568
TCGA-DJ-A3UX-01	0.60074
TCGA-KS-A4I1-01	0.682554
TCGA-EL-A3ZG-01	0.708588
TCGA-ET-A2N5-01	0.667853
TCGA-ET-A3DT-01	0.651959
TCGA-EL-A3GX-01	0.742531
TCGA-EM-A2OW-01	0.699948
TCGA-EM-A2CO-01	0.804418
TCGA-EM-A22K-01	0.576529
TCGA-DJ-A3VE-01	0.509245
TCGA-BJ-A2P4-01	0.611674
TCGA-EM-A4FU-01	0.592943
TCGA-FE-A3PC-01	0.562099
TCGA-EM-A3SU-01	0.77214
TCGA-EM-A4G1-01	0.707126
TCGA-KS-A4IB-01	0.757454
TCGA-ET-A3DR-01	0.541344
TCGA-EM-A2OY-01	0.971445
TCGA-ET-A39T-01	0.78922
TCGA-EM-A1YE-01	0.679946
TCGA-ET-A25N-01	0.495344
TCGA-CE-A3MD-01	0.565818
TCGA-L6-A4EQ-01	0.626405
TCGA-EM-A3FN-01	0.715057
TCGA-FY-A3NM-01	0.719777
TCGA-DJ-A2PX-01	0.590585
TCGA-EM-A2P0-01	0.564436
TCGA-EL-A3GS-01	0.686471
TCGA-EM-A1CT-01	0.644349
TCGA-EM-A4FR-01	0.569096
TCGA-EL-A4KD-01	0.412289
TCGA-ET-A4KQ-01	0.536276
TCGA-FE-A231-01	0.853428
TCGA-EL-A3H4-01	0.589341
TCGA-FE-A238-01	0.712516
TCGA-DJ-A3UW-01	0.612546
TCGA-EM-A3AQ-01	0.558451
TCGA-EL-A4JX-01	0.656953
TCGA-EL-A3D5-01	0.784878
TCGA-ET-A3DQ-01	0.494779
GTEX-111CU-0226-SM-5GZXC	0.467639
GTEX-111FC-1026-SM-5GZX1	0.320975
GTEX-111VG-0526-SM-5N9BW	0.178081
GTEX-111YS-0726-SM-5GZY8	0.313125
GTEX-1122O-0226-SM-5N9DA	0.33588
GTEX-1128S-0126-SM-5H12S	0.253777
GTEX-113JC-0126-SM-5EGJW	0.175291
GTEX-117XS-0526-SM-5987Q	0.112974
GTEX-117YW-0126-SM-5EGGN	0.207986
GTEX-117YX-1226-SM-5H11S	0.411096
GTEX-1192W-0126-SM-5EGGS	0.259524
GTEX-1192X-1126-SM-5EGGU	0.291035
GTEX-11DXX-0226-SM-5P9HL	0.388172
GTEX-11DXY-0426-SM-5H12R	0.175188
GTEX-11DXZ-0926-SM-5N9CG	0.306555
GTEX-11DYG-0826-SM-5N9GH	0.261933
GTEX-11DZ1-2726-SM-5A5KH	0.349833
GTEX-11EI6-0726-SM-59866	0.181308
GTEX-11EM3-0126-SM-5985K	0.26477
GTEX-11EMC-0226-SM-5EGLP	0.16649
GTEX-11EQ8-0826-SM-5N9FG	0.386321
GTEX-11EQ9-0626-SM-5A5K1	0.335492
GTEX-11GS4-0826-SM-5986J	0.23444
GTEX-11GSO-0626-SM-5A5LW	0.451441
GTEX-11GSP-0126-SM-5A5KU	0.00806721
GTEX-11I78-0526-SM-5986A	0.306327
GTEX-11LCK-0526-SM-5A5M9	0.266569
GTEX-11NSD-0126-SM-5987F	0.356122
GTEX-11NUK-1026-SM-5HL5J	0.22894
GTEX-11NV4-0626-SM-5N9BR	0.514548
GTEX-11O72-2326-SM-5BC7H	0.176971
GTEX-11OF3-0626-SM-5BC4Y	0.230366
GTEX-11P7K-0226-SM-5986Z	0.283817
GTEX-11P81-0126-SM-5HL5Y	0.31172
GTEX-11P82-0226-SM-5HL4O	0.299443
GTEX-11TT1-1126-SM-5P9GV	0.402228
GTEX-11TTK-0826-SM-5N9EG	0.34667
GTEX-11TUW-0226-SM-5LU8X	0.300417
GTEX-11UD2-0626-SM-5GU6L	0.387707
GTEX-11VI4-0226-SM-5GU6C	0.426207
GTEX-11XUK-0226-SM-5EQLW	0.562759
GTEX-11ZTS-1126-SM-5LU9X	0.0970466
GTEX-11ZTT-1026-SM-5EQKF	0.445226
GTEX-11ZVC-0126-SM-5986G	0.16382
GTEX-1211K-0726-SM-5FQUW	0.441595
GTEX-1212Z-0426-SM-5FQT6	0.249346
GTEX-12584-0826-SM-5FQSK	0.296507
GTEX-12696-0326-SM-5EGL4	0.425531
GTEX-1269C-0226-SM-5EGKS	0.147265
GTEX-12BJ1-0426-SM-5FQSO	0.361255
GTEX-12WSC-0826-SM-5EQ5Q	0.111863
GTEX-12WSD-0926-SM-5GCNL	0.160393
GTEX-12WSE-1226-SM-73KUF	0.138877
GTEX-12WSG-0226-SM-5EGIF	0.274209
GTEX-12WSH-0226-SM-5GCOG	0.260097
GTEX-12WSJ-0326-SM-5GCMT	0.522158
GTEX-12WSK-0926-SM-5CVNQ	0.324358
GTEX-12WSL-0626-SM-5GCOY	0.30936
GTEX-12WSN-0726-SM-5GCMS	0.347279
GTEX-12ZZX-1226-SM-5EGHS	0.145129
GTEX-12ZZY-0826-SM-5EQMT	0.131522
GTEX-12ZZZ-1226-SM-59HK1	0.239126
GTEX-13111-0226-SM-5EQ55	0.246025
GTEX-13112-0326-SM-5P9IW	0.162125
GTEX-13113-0126-SM-5LZVX	0.371905
GTEX-1313W-0726-SM-5EGK1	0.250532
GTEX-131XE-0126-SM-5LZVC	0.385431
GTEX-131XF-1826-SM-5EGKG	0.337396
GTEX-131XG-0226-SM-5IFG1	0.375535
GTEX-131XH-0526-SM-5DUX7	0.278069
GTEX-131YS-0726-SM-5P9G9	0.315016
GTEX-132AR-1126-SM-5P9GA	0.357199
GTEX-132NY-1026-SM-5P9IY	0.325529
GTEX-132QS-0326-SM-5IJFN	0.460641
GTEX-133LE-0326-SM-5P9G4	0.303465
GTEX-1399R-0126-SM-5IFEV	0.265792
GTEX-1399T-0126-SM-5KM15	0.306554
GTEX-1399U-0326-SM-5P9G5	0.36991
GTEX-139T6-0326-SM-5J2LY	0.363595
GTEX-139TS-0126-SM-5K7XJ	0.121805
GTEX-139UW-0126-SM-5KM1B	0.268163
GTEX-139YR-1226-SM-5IFEU	0.295997
GTEX-13CF3-0926-SM-5LZZC	0.350044
GTEX-13D11-0226-SM-5LZXL	0.349241
GTEX-13FH7-0126-SM-5KLZ1	0.379259
GTEX-13FHO-0926-SM-5N9EW	0.207429
GTEX-13FHP-0926-SM-5L3EC	0.225511
GTEX-13FLV-0226-SM-5J2OF	0.339759
GTEX-13FLW-0326-SM-5J2M4	0.424248
GTEX-13FTW-0626-SM-5IFEX	0.472148
GTEX-13FTY-0726-SM-5J2OH	0.255455
GTEX-13FXS-0726-SM-5LZXJ	0.263755
GTEX-13G51-1226-SM-5K7Z3	0.129959
GTEX-13IVO-0926-SM-5KLZP	0.423507
GTEX-13JVG-0926-SM-5IJE1	0.242826
GTEX-13N11-1026-SM-5K7XQ	0.402311
GTEX-13N1W-0826-SM-5MR5J	0.361406
GTEX-13N2G-0726-SM-5MR38	0.289005
GTEX-13NYB-0726-SM-5MR4J	0.253236
GTEX-13NYC-2426-SM-5MR3K	0.307488
GTEX-13NZ8-0226-SM-5J2OK	0.385372
GTEX-13NZ9-1126-SM-5MR37	0.352209
GTEX-13NZA-1026-SM-5MR48	0.25948
GTEX-13O1R-0826-SM-5J2MB	0.445039
GTEX-13O21-2226-SM-5MR3L	0.332404
GTEX-13O3O-0926-SM-5KM1F	0.283399
GTEX-13O3P-0726-SM-5J2OM	0.219465
GTEX-13O3Q-0626-SM-5IJG1	0.253841
GTEX-13O61-0226-SM-5KM52	0.470691
GTEX-13OVG-0226-SM-5LU93	0.277413
GTEX-13OVI-0826-SM-5KLZ8	0.312106
GTEX-13OVJ-0626-SM-5J2O2	0.338278
GTEX-13OVK-0226-SM-6M472	0.346627
GTEX-13OW5-0626-SM-5J2N2	0.315631
GTEX-13OW6-0726-SM-5L3FX	0.275997
GTEX-13OW7-0826-SM-5L3EL	0.219943
GTEX-13OW8-0126-SM-5IJE5	0.257806
GTEX-13PDP-1026-SM-5L3FA	0.305496
GTEX-13PL6-1026-SM-5L3E5	0.316735
GTEX-13PVQ-0726-SM-5L3GI	0.271669
GTEX-13PVR-0626-SM-5S2RC	0.343046
GTEX-13QBU-0626-SM-5J2OG	0.324484
GTEX-13QJ3-0926-SM-73KX5	0.221849
GTEX-13QJC-0826-SM-5RQKC	0.287902
GTEX-13RTJ-0326-SM-5YYAE	0.355605
GTEX-13RTK-0326-SM-5RQHS	0.349905
GTEX-13S86-1126-SM-5RQJX	0.328997
GTEX-13U4I-0526-SM-5LU59	0.202521
GTEX-13VXT-0626-SM-5SIA1	0.395548
GTEX-13VXU-0826-SM-5KLZ2	0.264725
GTEX-13W46-0926-SM-5LU3T	0.222446
GTEX-13X6H-0526-SM-5LU4Q	0.273916
GTEX-13X6J-0826-SM-5LU32	0.141726
GTEX-13YAN-0926-SM-5O9C3	0.300892
GTEX-144GL-1226-SM-5O9A4	0.146224
GTEX-144GM-0226-SM-5Q5CB	0.426157
GTEX-144GO-0126-SM-5LUAO	0.321164
GTEX-145LT-0226-SM-5S2QK	0.365692
GTEX-145LU-0426-SM-5O9AH	0.0722696
GTEX-145ME-0126-SM-5S2QM	0.364373
GTEX-145MG-0826-SM-5Q5C2	0.226288
GTEX-145MH-0426-SM-5LU8T	0.148215
GTEX-145MI-1126-SM-5O9AK	0.420492
GTEX-146FQ-0726-SM-5LUA7	0.267683
GTEX-146FR-0326-SM-5SI8U	0.418707
GTEX-14753-0926-SM-5Q5BI	0.125677
GTEX-1477Z-0226-SM-5TDCI	0.168616
GTEX-147F4-0826-SM-5QGRB	0.303521
GTEX-147GR-0726-SM-5S2PL	0.210504
GTEX-148VI-0526-SM-5TDDG	0.20406
GTEX-148VJ-0726-SM-5LU8J	0.32462
GTEX-1497J-0126-SM-5Q5BK	0.253227
GTEX-14A5H-0726-SM-5Q5DW	0.412399
GTEX-14A6H-2426-SM-5Q5BO	0.295044
GTEX-14ABY-0926-SM-5Q5DY	0.263468
GTEX-14AS3-0226-SM-5Q5B6	0.326911
GTEX-14ASI-0726-SM-5Q5DC	0.265719
GTEX-14B4R-0126-SM-5TDE4	0.35796
GTEX-14BIN-0126-SM-5TDCG	0.288114
GTEX-14BMU-0226-SM-5S2QA	0.471656
GTEX-14BMV-0726-SM-73KVE	0.244782
GTEX-14C38-0826-SM-5S2U8	0.339345
GTEX-14C39-0226-SM-5TDDW	0.232771
GTEX-14C5O-0826-SM-5TDEG	0.266236
GTEX-14DAQ-0826-SM-73KWT	0.0501513
GTEX-14E6C-2626-SM-5RQJP	0.355206
GTEX-14E6E-0326-SM-73KY6	0.277889
GTEX-14E7W-0926-SM-5YYA4	0.239755
GTEX-14ICK-1626-SM-6ETZX	0.203012
GTEX-14ICL-0426-SM-5RQJ3	0.395759
GTEX-14JG6-1326-SM-9OSXU	0.405891
GTEX-14JIY-1226-SM-6871R	0.387164
GTEX-14PHW-2926-SM-6AJBA	0.266548
GTEX-14PII-0826-SM-6871S	0.227604
GTEX-14PJ3-0126-SM-69LQP	0.402256
GTEX-14PJ4-0326-SM-664OT	0.411063
GTEX-14PJ6-0326-SM-6871H	0.572375
GTEX-14PJM-1326-SM-664NX	0.427659
GTEX-14PJO-0626-SM-6LLHH	0.212235
GTEX-14PK6-0426-SM-6EU1J	0.420799
GTEX-14PKU-0326-SM-6AJA7	0.367593
GTEX-14PKV-0626-SM-6AJA2	0.281135
GTEX-14PN3-0826-SM-69LOS	0.355401
GTEX-14PN4-1526-SM-6871V	0.261002
GTEX-14PQA-1226-SM-6M47A	0.254584
GTEX-14XAO-0426-SM-6AJB6	0.496546
GTEX-15CHC-0126-SM-5YYBA	0.430535
GTEX-15CHQ-0826-SM-69LOT	0.275538
GTEX-15CHR-1726-SM-7DUGW	0.329576
GTEX-15D1Q-0626-SM-6AJAZ	0.291089
GTEX-15DDE-0626-SM-69LOK	0.388244
GTEX-15DZA-0226-SM-7KFS6	0.299599
GTEX-15EO6-0126-SM-6LPKJ	0.457224
GTEX-15ER7-0726-SM-7KUMF	0.201804
GTEX-15ETS-0526-SM-6PAN3	0.335474
GTEX-15EU6-1426-SM-6M48E	0.435175
GTEX-15FZZ-0226-SM-6LLI4	0.352459
GTEX-15G19-0626-SM-6M474	0.322647
GTEX-15G1A-0326-SM-6M467	0.349651
GTEX-15RIE-0426-SM-7KUMH	0.345252
GTEX-15RIF-0326-SM-7KUFR	0.669794
GTEX-15RJ7-0326-SM-6M47H	0.449379
GTEX-15RJE-1326-SM-6LPI6	0.137372
GTEX-15SB6-1526-SM-7KUMQ	0.297442
GTEX-15SHU-0726-SM-7KUFI	0.203408
GTEX-15SHV-0426-SM-6M476	0.520858
GTEX-15UF6-1126-SM-6LPJ3	0.259686
GTEX-169BO-0326-SM-7EPIM	0.332653
GTEX-16AAH-0326-SM-7DHML	0.437005
GTEX-16BQI-0726-SM-6LPJZ	0.329455
GTEX-16GPK-0926-SM-6LPJ9	0.358582
GTEX-16MT8-0626-SM-6M47Q	0.281753
GTEX-16MTA-0726-SM-7KUL4	0.176335
GTEX-16NGA-0326-SM-718AJ	0.481943
GTEX-16NPX-1426-SM-6LPK3	0.350174
GTEX-16XZY-0726-SM-79OMU	0.342522
GTEX-16XZZ-0826-SM-7IGM3	0.383301
GTEX-16YQH-0326-SM-6LPJV	0.144054
GTEX-16Z82-0426-SM-7EPGX	0.166445
GTEX-178AV-0726-SM-6LPJI	0.383876
GTEX-17EVP-0126-SM-7EPHW	0.193357
GTEX-17EVQ-0526-SM-7KFSK	0.201202
GTEX-17F96-0526-SM-79OLE	0.279455
GTEX-17F97-0626-SM-7IGOH	0.267433
GTEX-17F9E-0626-SM-79ON5	0.241375
GTEX-17F9Y-0526-SM-7EWDC	0.191963
GTEX-17GQL-0226-SM-7LTAK	0.386582
GTEX-17HG3-0226-SM-7EWEA	0.212728
GTEX-17HGU-0826-SM-7EWE5	0.293036
GTEX-17HHE-0426-SM-79OK3	0.262991
GTEX-17HHY-0826-SM-7EPID	0.270006
GTEX-17HII-1926-SM-79OLB	0.190854
GTEX-17JCI-0626-SM-7IGM7	0.177692
GTEX-17KNJ-1026-SM-79ONK	0.310332
GTEX-17MF6-0626-SM-7LT8D	0.139722
GTEX-183FY-0626-SM-79OKR	0.156948
GTEX-183WM-2626-SM-7KFRY	0.304078
GTEX-18465-1426-SM-7KFTF	0.211564
GTEX-18A66-0826-SM-72D5Z	0.297001
GTEX-18A67-0826-SM-7KFTI	0.280505
GTEX-18A6Q-0726-SM-7LT8Y	0.256258
GTEX-18A7A-0826-SM-7KFTJ	0.218007
GTEX-18D9A-0126-SM-7KFSI	0.370013
GTEX-18D9B-0726-SM-72D6K	0.331332
GTEX-18D9U-1026-SM-72D5R	0.318289
GTEX-18QFQ-0726-SM-7LG6D	0.300014
GTEX-1A3MV-0326-SM-73KW7	0.358482
GTEX-1A8FM-0726-SM-7DUGK	0.219727
GTEX-1A8G6-0626-SM-7IGNB	0.177085
GTEX-1A8G7-1026-SM-73KVA	0.279304
GTEX-1AMEY-0126-SM-73KTX	0.248647
GTEX-1AMFI-0526-SM-7189M	0.500687
GTEX-1AX8Z-0826-SM-7DUFZ	0.197488
GTEX-1AX9I-0626-SM-72D54	0.25974
GTEX-1AX9J-2126-SM-731DD	0.317605
GTEX-1AX9K-0626-SM-73KVD	0.277165
GTEX-1AYCT-0226-SM-73KVB	0.394885
GTEX-1B8KE-0626-SM-7189H	0.469497
GTEX-1B8KZ-0426-SM-731DP	0.459893
GTEX-1B8L1-1626-SM-7IGMH	0.247173
GTEX-1B8SF-0626-SM-73KVV	0.000761967
GTEX-1B8SG-1126-SM-7IGMT	0.363404
GTEX-1B932-0926-SM-73KUP	0.235569
GTEX-1B933-1026-SM-7P8RO	0.364948
GTEX-1B97I-0326-SM-7DUGB	0.296598
GTEX-1B97J-0626-SM-7P8RU	0.358118
GTEX-1BAJH-0926-SM-79OO6	0.162863
GTEX-1C2JI-0326-SM-7EWFD	0.311493
GTEX-1C475-0226-SM-7MGXM	0.511028
GTEX-1C4CL-0726-SM-7IGP9	0.169766
GTEX-1C64N-1026-SM-79ONM	0.205796
GTEX-1C6VQ-0526-SM-7MGWD	0.254335
GTEX-1C6VR-0426-SM-7IGN6	0.0692914
GTEX-1C6VS-0826-SM-7EWEI	0.236709
GTEX-1CAMQ-1126-SM-7EWFE	0.205989
GTEX-1CAMR-0226-SM-7DUGO	0.412724
GTEX-1CAMS-0826-SM-7P8P1	0.305531
GTEX-1CB4E-0326-SM-7MXT3	0.320313
GTEX-1CB4F-0826-SM-793CV	0.291245
GTEX-1CB4G-1526-SM-7P8QG	0.372311
GTEX-1CB4H-0126-SM-7IGN2	0.38689
GTEX-1CB4I-0726-SM-7DUGS	0.432703
GTEX-1CB4J-1426-SM-7MKFR	0.336172
GTEX-1E1VI-0726-SM-7P8QJ	0.114811
GTEX-1EH9U-0926-SM-7EWF1	0.207209
GTEX-1EKGG-0726-SM-7IGPX	0.0567937
GTEX-1EMGI-0826-SM-7EPHY	0.0923137
GTEX-1EN7A-1026-SM-7IGPZ	0.107984
GTEX-1EU9M-0626-SM-7MXUT	0.1144
GTEX-1EWIQ-0826-SM-7MXTH	0.207388
GTEX-1EX96-0126-SM-9KNVH	0.197589
GTEX-1F48J-0926-SM-7P8PZ	0.281294
GTEX-1F52S-0526-SM-7P8TP	0.374944
GTEX-1F5PL-0826-SM-7MXU7	0.500417
GTEX-1F6IF-1126-SM-9KNV2	0.219674
GTEX-1F75A-0326-SM-7MXTR	0.251011
GTEX-1F75B-0826-SM-9QEIT	0.236026
GTEX-1F75I-0926-SM-7MXUU	0.396935
GTEX-1F88F-0726-SM-7P8R7	0.182647
GTEX-1FIGZ-0226-SM-7P8QR	0.419906
GTEX-1GF9U-0226-SM-7P8TY	0.3222
GTEX-1GF9V-0926-SM-9KNW7	0.20661
GTEX-1GF9W-0626-SM-7MXVJ	0.325766
GTEX-1GF9X-0126-SM-A9G38	0.343763
GTEX-1GL5R-0626-SM-7PBZY	0.246561
GTEX-1GMR3-0726-SM-9WPOF	0.196569
GTEX-1GMR8-0826-SM-9KNUR	0.289922
GTEX-1GMRU-1126-SM-9KNV1	0.143531
GTEX-1GN1U-0826-SM-9WPPX	0.160686
GTEX-1GN1V-0626-SM-7P8QU	0.324253
GTEX-1GN1W-0126-SM-7MXV7	0.361673
GTEX-1GN2E-0826-SM-9WYT8	0.130546
GTEX-1GN73-0826-SM-9OSW4	0.324606
GTEX-1GPI7-0726-SM-9WG84	0.341668
GTEX-1GTWX-0726-SM-9WPPA	0.255909
GTEX-1GZ2Q-0826-SM-7P8TK	0.293795
GTEX-1GZ4H-0226-SM-9JGGJ	0.676293
GTEX-1GZ4I-0626-SM-9WPPN	0.308345
GTEX-1GZHY-1426-SM-9WG5H	0.1216
GTEX-1H11D-0626-SM-9WPQ1	0.251413
GTEX-1H1CY-0726-SM-9OSXX	0.174346
GTEX-1H1DE-0226-SM-ARZN8	0.18543
GTEX-1H1DF-1026-SM-9QEJ1	0.32131
GTEX-1H1DG-0726-SM-A96TN	0.387266
GTEX-1H1E6-0326-SM-9OSWE	0.35231
GTEX-1H1ZS-0726-SM-A9G3K	0.32935
GTEX-1H2FU-0626-SM-9WPPS	0.405569
GTEX-1H3VE-0826-SM-9KNVQ	0.303881
GTEX-1HB9E-0826-SM-CNNQJ	0.197407
GTEX-1HBPH-0926-SM-A9SME	0.225333
GTEX-1HBPI-0826-SM-9WYTX	0.22333
GTEX-1HBPM-0926-SM-ARL9C	0.302282
GTEX-1HBPN-1226-SM-B2LW9	0.30449
GTEX-1HC8U-1226-SM-9WYUW	0.250231
GTEX-1HCU7-0826-SM-B2LX7	0.271859
GTEX-1HCU9-0226-SM-9WPNT	0.432819
GTEX-1HCUA-0126-SM-B2LWC	0.293196
GTEX-1HCVE-0726-SM-A96SH	0.19369
GTEX-1HFI6-1326-SM-A9SL8	0.153434
GTEX-1HFI7-0326-SM-9WPOX	0.314716
GTEX-1HGF4-0726-SM-9WYU9	0.274106
GTEX-1HKZK-0826-SM-A9G2C	0.329839
GTEX-1HR98-0326-SM-CGQEL	0.243299
GTEX-1HR9M-0626-SM-A96S6	0.239868
GTEX-1HSEH-0826-SM-B2LXE	0.335334
GTEX-1HSGN-0726-SM-A9G2F	0.342139
GTEX-1HSKV-1026-SM-B2LWK	0.284432
GTEX-1HSMO-0726-SM-A96TM	0.288598
GTEX-1HSMQ-0526-SM-A96TY	0.47538
GTEX-1HT8W-1526-SM-CE6S3	0.109953
GTEX-1HUB1-1226-SM-B2LWX	0.224963
GTEX-1I19N-0226-SM-CE6ST	0.281143
GTEX-1I1GP-0326-SM-CNPQ4	0.315808
GTEX-1I1GQ-0826-SM-CNNQR	0.291648
GTEX-1I1GR-1126-SM-A9G2I	0.113756
GTEX-1I1GS-0726-SM-C1YS7	0.264365
GTEX-1I1GT-0826-SM-B2LWO	0.253806
GTEX-1I1GU-0826-SM-ARZM5	0.385963
GTEX-1I1GV-0726-SM-ARZLY	0.217372
GTEX-1I6K6-0726-SM-B2LX4	0.4941
GTEX-1I6K7-1126-SM-A96SW	0.294396
GTEX-1ICG6-0426-SM-ARU7M	0.359149
GTEX-1ICLY-0726-SM-A96TB	0.367489
GTEX-1ICLZ-0526-SM-ARZM8	0.26755
GTEX-1IDJC-1026-SM-A96T2	0.231847
GTEX-1IDJH-0826-SM-CE6SY	0.211901
GTEX-1IDJU-1626-SM-CJI4B	0.405474
GTEX-1IE54-0926-SM-A9G2Y	0.212362
GTEX-1IGQW-0626-SM-C1YR9	0.356836
GTEX-1IKJJ-1026-SM-A96SQ	0.184191
GTEX-1IKOE-0926-SM-ARU7X	0.314953
GTEX-1IKOH-0626-SM-CJI35	0.215084
GTEX-1IL2U-0826-SM-CL53Q	0.21805
GTEX-1IL2V-0626-SM-ARU7S	0.222483
GTEX-1IOXB-1026-SM-CJI4D	0.270698
GTEX-1IY9M-1026-SM-A96TG	0.288006
GTEX-1J1OQ-0526-SM-A9G2P	0.274574
GTEX-1J1R8-0126-SM-CJI36	0.272434
GTEX-1J8EW-1126-SM-A96T8	0.117402
GTEX-1J8JJ-0726-SM-AHZ3E	0.187178
GTEX-1J8Q3-0226-SM-C1YR4	0.433004
GTEX-1J8QM-0726-SM-CE6RF	0.487889
GTEX-1JJ6O-0626-SM-AHZ3H	0.202618
GTEX-1JJE9-0226-SM-CY8HU	0.268662
GTEX-1JJEA-0626-SM-D3L96	0.25409
GTEX-1JK1U-0326-SM-CXZJH	0.361212
GTEX-1JKYN-1126-SM-CGQG5	0.400442
GTEX-1JKYR-0826-SM-ARU8L	0.289687
GTEX-1JMLX-0826-SM-CNNPP	0.222894
GTEX-1JMPY-0126-SM-CJI39	0.32677
GTEX-1JMPZ-0626-SM-CY8HY	0.146292
GTEX-1JMQJ-2026-SM-CNPP9	0.212713
GTEX-1JMQK-2126-SM-CY8I2	0.265296
GTEX-1JMQL-0926-SM-CJI3F	0.306834
GTEX-1JN6P-0626-SM-ARZN6	0.116526
GTEX-1K2DA-1526-SM-CGQGQ	0.410958
GTEX-1K2DU-0126-SM-E9TIU	0.350149
GTEX-1K9T9-0826-SM-EAZ4X	0.292585
GTEX-1KAFJ-0426-SM-DHXJH	0.251808
GTEX-1KANC-0826-SM-D3LA8	0.419413
GTEX-1KD4Q-1026-SM-CXZKJ	0.327431
GTEX-1KD5A-0426-SM-D4P3X	0.159017
GTEX-1KXAM-1726-SM-D3LAE	0.44659
GTEX-1LB8K-0626-SM-D4P3Z	0.128997
GTEX-1LBAC-0726-SM-D3L9U	0.296405
GTEX-1LG7Y-0626-SM-DHXJM	0.320004
GTEX-1LG7Z-0526-SM-D4P3Q	0.106477
GTEX-1LGOU-0126-SM-EV79W	0.50761
GTEX-1LGRB-1226-SM-CNNPS	0.224746
GTEX-1LH75-0626-SM-DIPG3	0.261945
GTEX-1LSVX-0726-SM-E9TJG	0.229638
GTEX-1LVAM-0826-SM-EV79X	0.383505
GTEX-1LVAN-0726-SM-CNNPF	0.36338
GTEX-1M4P7-0626-SM-EVR51	0.259347
GTEX-1MA7X-0926-SM-DIPEJ	0.188497
GTEX-1MCC2-0526-SM-DHXJS	0.430207
GTEX-1MGNQ-0726-SM-DPRYH	0.354102
GTEX-1MJK2-0826-SM-DTXE8	0.351565
GTEX-1MJK3-0326-SM-DTX96	0.425527
GTEX-1MUQO-0726-SM-E9TJM	0.290237
GTEX-1N5O9-1026-SM-DTX8Y	0.296088
GTEX-1NUQO-0926-SM-DTXEX	0.350914
GTEX-1NV5F-0726-SM-DTXEH	0.241208
GTEX-1O97I-1026-SM-E76PI	0.0379712
GTEX-1O9I2-1226-SM-E6CQC	0.257537
GTEX-1OFPY-1526-SM-DTX8R	0.459979
GTEX-1OJC3-0626-SM-E8VMO	0.124319
GTEX-1OJC4-0526-SM-E6CQV	0.420281
GTEX-1P4AB-1126-SM-DTX94	0.207124
GTEX-1PBJI-0726-SM-EXUSQ	0.241668
GTEX-1PBJJ-1926-SM-DTX8T	0.218265
GTEX-1PDJ9-0826-SM-E76PS	0.319197
GTEX-1PFEY-0226-SM-EVR3M	0.448313
GTEX-1PIGE-0726-SM-DPRZD	0.465832
GTEX-1PIIG-2026-SM-EVR43	0.210595
GTEX-1PPGY-1426-SM-EVR3R	0.333317
GTEX-1PPH8-0926-SM-DTX9U	0.38625
GTEX-1PWST-0726-SM-EWRMO	0.397859
GTEX-1QAET-0226-SM-EVR3T	0.256363
GTEX-1QCLY-0826-SM-DTX8A	0.26566
GTEX-1QCLZ-0626-SM-E6CR2	0.453708
GTEX-1QEPI-0726-SM-E76QG	0.17471
GTEX-1QMI2-0826-SM-EXUT4	0.212158
GTEX-1QP28-0626-SM-E76P5	0.344913
GTEX-1QP2A-0626-SM-DTX9C	0.399736
GTEX-1QP66-0326-SM-DTX7V	0.388107
GTEX-1QP67-0326-SM-EVR45	0.371726
GTEX-1QP6S-2526-SM-DTX9Z	0.176795
GTEX-1QP9N-0126-SM-DPRZS	0.465555
GTEX-1QPFJ-0626-SM-DTX7Y	0.340132
GTEX-1QW4Y-0226-SM-EAZ3U	0.707854
GTEX-1R46S-0426-SM-EVR48	0.267243
GTEX-1R9JW-0226-SM-EVR4K	0.325715
GTEX-1R9K4-0726-SM-EWRN2	0.209704
GTEX-1R9K5-0726-SM-EAZ4E	0.378458
GTEX-1R9PM-0226-SM-DPRY7	0.410362
GTEX-1RAZA-0826-SM-EAZ4I	0.459928
GTEX-1RAZQ-0926-SM-EAZ4Q	0.370244
GTEX-1RAZR-1126-SM-E6CRC	0.379364
GTEX-1RAZS-1026-SM-E9TID	0.24104
GTEX-1RDX4-0926-SM-E9U6D	0.15669
GTEX-1RMOY-0126-SM-EWRNN	0.222326
GTEX-1RNSC-1126-SM-E9TIP	0.0534575
GTEX-1RQEC-1026-SM-EVR5B	0.268229
GTEX-1RQED-0926-SM-EWRNZ	0.176131
GTEX-1S5ZU-0726-SM-EWROH	0.279465
GTEX-1S83E-0726-SM-EV7B6	0.318445
GTEX-N7MS-2326-SM-2HMLD	0.164792
GTEX-NFK9-0726-SM-2HMJW	0.335238
GTEX-O5YV-1526-SM-EV799	0.269577
GTEX-OHPK-2626-SM-2HMK9	0.350033
GTEX-OHPL-2626-SM-2HMJA	0.525358
GTEX-OHPM-2626-SM-33HC5	0.448718
GTEX-OIZF-2626-SM-7P8QZ	0.343006
GTEX-OIZG-0226-SM-2TC5L	0.331358
GTEX-OIZI-0726-SM-2XCEI	0.418036
GTEX-OOBJ-2626-SM-2I3F6	0.346255
GTEX-OXRK-0626-SM-2HMJ5	0.307513
GTEX-OXRL-2626-SM-2I3F1	0.3143
GTEX-OXRN-1526-SM-E6CHM	0.303475
GTEX-OXRO-1226-SM-48TDL	0.401165
GTEX-OXRP-0326-SM-33HBJ	0.328107
GTEX-P44G-0626-SM-2I5EO	0.444877
GTEX-P4PQ-2626-SM-33HC9	0.394176
GTEX-P4QS-2626-SM-2I3EV	0.412098
GTEX-P4QT-2626-SM-2I3FM	0.380432
GTEX-P78B-0526-SM-2I5F7	0.376561
GTEX-PLZ4-1226-SM-2I5FE	0.262462
GTEX-POYW-0826-SM-2XCEM	0.361296
GTEX-PWCY-2326-SM-2I3EQ	0.295679
GTEX-PWN1-2626-SM-2I3FH	0.32523
GTEX-PX3G-2626-SM-2I3EG	0.371922
GTEX-Q2AG-0826-SM-2HMKF	0.346227
GTEX-Q2AH-0726-SM-2I3EA	0.373006
GTEX-Q2AI-0326-SM-2I3EK	0.368485
GTEX-Q734-0526-SM-2I3EH	0.271543
GTEX-QDT8-1226-SM-EVR35	0.426393
GTEX-QDVJ-0226-SM-2I5FV	0.428434
GTEX-QDVN-0626-SM-2I3FP	0.36596
GTEX-QEG5-0826-SM-2I5GF	0.478548
GTEX-QEL4-0726-SM-3GIJ5	0.436695
GTEX-QLQ7-0726-SM-2I5G2	0.375506
GTEX-QV31-0726-SM-3GAEG	0.452182
GTEX-QV44-0826-SM-2S1RG	0.341511
GTEX-QXCU-0326-SM-2TC63	0.36833
GTEX-R3RS-0726-SM-3GIJR	0.385841
GTEX-R53T-0526-SM-3GADL	0.330161
GTEX-R55C-0626-SM-2TF4Q	0.396269
GTEX-R55E-0826-SM-2TC5M	0.253302
GTEX-R55G-0726-SM-2TC6J	0.41703
GTEX-REY6-0526-SM-2TF5M	0.195353
GTEX-RM2N-0526-SM-2TF4N	0.353326
GTEX-RN5K-2826-SM-EZ6L3	0.442518
GTEX-RN64-0626-SM-2TC5V	0.283901
GTEX-RNOR-0926-SM-2TF56	0.217135
GTEX-RTLS-0626-SM-5SI7Z	0.148749
GTEX-RU1J-0226-SM-2TF5Y	0.340402
GTEX-RU72-0126-SM-2TF6Z	0.176064
GTEX-RUSQ-1026-SM-2TF6V	0.390075
GTEX-RVPV-1226-SM-2TF73	0.2827
GTEX-RWS6-0626-SM-2XCAS	0.258706
GTEX-RWSA-0826-SM-2XCBF	0.244296
GTEX-S32W-0726-SM-2XCBL	0.318558
GTEX-S341-0226-SM-D4P1Y	0.412884
GTEX-S7SE-0726-SM-2XCD7	0.23383
GTEX-S7SF-0226-SM-5SI7H	0.289077
GTEX-SE5C-0726-SM-4BRWY	0.395404
GTEX-SIU8-0626-SM-2XCDN	0.0836342
GTEX-SJXC-0726-SM-2XCFJ	0.410213
GTEX-SN8G-1526-SM-4DM79	0.19302
GTEX-SNOS-0226-SM-32PLR	0.397564
GTEX-SUCS-0226-SM-32PLQ	0.391313
GTEX-T2IS-0626-SM-32QP6	0.234101
GTEX-T5JW-1226-SM-3GACY	0.377811
GTEX-T6MN-0626-SM-32PM9	0.134942
GTEX-T6MO-0226-SM-32QOL	0.42483
GTEX-T8EM-0226-SM-3DB7C	0.461687
GTEX-TKQ1-0126-SM-33HB3	0.434119
GTEX-TMMY-0826-SM-33HB9	0.597347
GTEX-TSE9-0626-SM-3DB8B	0.245677
GTEX-U3ZH-0226-SM-3DB7B	0.161996
GTEX-U3ZM-0126-SM-3DB8M	0.329188
GTEX-U3ZN-0326-SM-3DB86	0.364035
GTEX-U412-0726-SM-EVR2Y	0.338173
GTEX-U4B1-0626-SM-3DB8L	0.374251
GTEX-U8T8-2326-SM-3DB96	0.335078
GTEX-UJMC-0326-SM-3GAE2	0.42485
GTEX-V1D1-0926-SM-4JBHQ	0.327672
GTEX-V955-0426-SM-3GAEL	0.420957
GTEX-VJYA-0426-SM-3GIJK	0.493015
GTEX-VUSG-0426-SM-3GIKD	0.299929
GTEX-W5WG-1426-SM-4KKZP	0.292477
GTEX-W5X1-0426-SM-3GILB	0.243863
GTEX-WEY5-0526-SM-3GIKZ	0.291417
GTEX-WFG7-0326-SM-DKPO8	0.347883
GTEX-WFG8-0426-SM-3GILD	0.364923
GTEX-WFJO-0226-SM-3GIKW	0.245499
GTEX-WH7G-0526-SM-3NMBI	0.346938
GTEX-WHPG-0226-SM-3NMB9	0.313235
GTEX-WHSB-1626-SM-3LK6J	0.309246
GTEX-WHSE-0626-SM-4RGNF	0.237325
GTEX-WK11-0926-SM-3NMAU	0.254905
GTEX-WL46-0126-SM-3TW8I	0.226619
GTEX-WOFL-0726-SM-3MJG4	0.180702
GTEX-WRHU-0926-SM-4E3IG	0.151153
GTEX-WVLH-0626-SM-3MJG7	0.16434
GTEX-WWYW-0826-SM-3NB2X	0.322818
GTEX-WXYG-0226-SM-3NB2Y	0.330593
GTEX-WY7C-0226-SM-3NB37	0.265599
GTEX-WYBS-1926-SM-3NM8N	0.368255
GTEX-WYJK-1626-SM-3NM9J	0.293825
GTEX-WYVS-0326-SM-3NM9V	0.265429
GTEX-X15G-0526-SM-3NMB7	0.272665
GTEX-X261-0726-SM-EZ6MH	0.410349
GTEX-X4LF-0426-SM-3NMB5	0.389621
GTEX-X4XX-0926-SM-46MV7	0.266603
GTEX-X4XY-0826-SM-4E3JM	0.254987
GTEX-X5EB-0726-SM-46MVR	0.257941
GTEX-X8HC-0726-SM-46MWG	0.23636
GTEX-XBED-0126-SM-47JY7	0.3745
GTEX-XBEW-0126-SM-4AT66	0.368288
GTEX-XGQ4-0426-SM-4AT4I	0.506856
GTEX-XLM4-0726-SM-4AT64	0.280414
GTEX-XMK1-0626-SM-4B65A	0.384003
GTEX-XOT4-1526-SM-EAZ2W	0.189972
GTEX-XUW1-1026-SM-4BONY	0.346537
GTEX-XUZC-0126-SM-4BOO6	0.475672
GTEX-XV7Q-0326-SM-4BRVM	0.278826
GTEX-XXEK-1326-SM-4BRV1	0.379183
GTEX-XYKS-0826-SM-4BRVF	0.615959
GTEX-Y111-1926-SM-4SOIS	0.238449
GTEX-Y114-0626-SM-4TT98	0.332404
GTEX-Y3I4-0226-SM-4TT27	0.363895
GTEX-Y3IK-0526-SM-4WWE3	0.226388
GTEX-Y5LM-0626-SM-4V6G4	0.302845
GTEX-Y5V5-0326-SM-5RQJG	0.171921
GTEX-Y5V6-0526-SM-4VBRV	0.377322
GTEX-Y8E4-0126-SM-4VBQ2	0.372603
GTEX-Y9LG-0426-SM-4VBRT	0.360807
GTEX-YB5E-0626-SM-4VDSE	0.472735
GTEX-YB5K-0526-SM-5LUAS	0.353865
GTEX-YEC3-0826-SM-4WWFP	0.429672
GTEX-YEC4-0626-SM-5CVLU	0.355626
GTEX-YF7O-0726-SM-4W213	0.490559
GTEX-YFC4-2626-SM-5P9FQ	0.559885
GTEX-YFCO-0326-SM-4W1ZP	0.465618
GTEX-YJ89-0726-SM-5P9F7	0.308707
GTEX-Z93S-0526-SM-EVYB4	0.191008
GTEX-Z9EW-0226-SM-5CVM7	0.348765
GTEX-ZA64-0426-SM-5HL96	0.362922
GTEX-ZAB5-0726-SM-5P9JG	0.157489
GTEX-ZAJG-0726-SM-5HL9A	0.367589
GTEX-ZAK1-0726-SM-5HL8Q	0.175248
GTEX-ZC5H-0626-SM-5LU9K	0.203946
GTEX-ZDTS-0926-SM-5YY9D	0
GTEX-ZDXO-1726-SM-5HL6L	0.22769
GTEX-ZDYS-0626-SM-5J2N5	0.27635
GTEX-ZE7O-1126-SM-57WC8	0.087502
GTEX-ZF28-0826-SM-4WKGJ	0.240052
GTEX-ZF29-0726-SM-DO92H	0.370649
GTEX-ZF3C-0826-SM-DO11E	0.0641674
GTEX-ZGAY-1026-SM-4WWBR	0.266982
GTEX-ZLFU-0626-SM-4WWBO	0.299047
GTEX-ZLV1-0126-SM-4WWBZ	0.46117
GTEX-ZLWG-0526-SM-4WWFB	0.400514
GTEX-ZPCL-0126-SM-4WWC8	0.346015
GTEX-ZPIC-0226-SM-DO91T	0.327079
GTEX-ZPU1-0426-SM-4WWCA	0.312168
GTEX-ZQG8-0926-SM-57WFF	0.338224
GTEX-ZQUD-0126-SM-7EPIS	0.257029
GTEX-ZT9W-0226-SM-7SB6H	0.386835
GTEX-ZT9X-0226-SM-51MT2	0.301397
GTEX-ZTPG-0826-SM-5DUVC	0.378769
GTEX-ZTSS-0226-SM-59877	0.386674
GTEX-ZTX8-0626-SM-59HKC	0.345242
GTEX-ZUA1-0926-SM-4YCDX	0.299728
GTEX-ZV6S-0226-SM-59HJT	0.346047
GTEX-ZV7C-0126-SM-57WDE	0.425779
GTEX-ZVP2-0426-SM-57WC2	0.298872
GTEX-ZVT3-0726-SM-5GICN	0.290396
GTEX-ZVZP-1026-SM-5GICI	0.417026
GTEX-ZVZQ-0626-SM-59HJU	0.230822
GTEX-ZXG5-0926-SM-5NQ8H	0.223688
GTEX-ZY6K-0226-SM-5SIAY	0.490484
GTEX-ZYFC-0926-SM-5GZWW	0.224425
GTEX-ZYFD-0826-SM-5NQ9A	0.373969
GTEX-ZYFG-0626-SM-5GZYA	0.379849
GTEX-ZYT6-0426-SM-5GID3	0.338523
GTEX-ZYVF-1126-SM-5E458	0.330921
GTEX-ZYW4-1126-SM-5SI99	0.252525
GTEX-ZYY3-1926-SM-5GZXS	0.277809
GTEX-ZZ64-0126-SM-5GZXA	0.30594
GTEX-ZZPU-1326-SM-5GZWS	0.332996
TCGA-ET-A3DW-11	0.691256
TCGA-EL-A3TA-11	0.654459
TCGA-EL-A3T7-11	0.568887
TCGA-BJ-A3PR-11	0.878805
TCGA-DO-A1JZ-11	0.679144
TCGA-BJ-A28W-11	0.87523
TCGA-BJ-A28R-11	0.66984
TCGA-KS-A41I-11	0.657196
TCGA-EL-A3ZG-11	0.685467
TCGA-BJ-A2N7-11	0.679156
TCGA-EL-A3ZQ-11	0.51544
TCGA-EM-A1CV-11	0.672492
TCGA-BJ-A290-11	0.590254
TCGA-EL-A3ZO-11	0.471216
TCGA-EL-A3T8-11	0.526359
TCGA-H2-A3RI-11	0.579037
TCGA-EL-A3N2-11	0.579241
TCGA-BJ-A28X-11	0.664502
TCGA-EM-A1YC-11	0.510541
TCGA-EL-A3MX-11	0.603727
TCGA-ET-A2N5-11	0.693759
TCGA-EL-A3T2-11	0.605326
TCGA-GE-A2C6-11	0.725052
TCGA-ET-A3DP-11	0.602439
TCGA-BJ-A3PU-11	0.632201
TCGA-EL-A3ZH-11	0.643769
TCGA-EL-A3ZP-11	0.571115
TCGA-EL-A3H2-11	0.70518
TCGA-EM-A1CU-11	0.738896
TCGA-EL-A3T3-11	0.617983
TCGA-H2-A2K9-11	0.633714
TCGA-EM-A3ST-11	0.738383
TCGA-EL-A3H7-11	0.519982
TCGA-EL-A3T6-11	0.537175
TCGA-EL-A3MY-11	0.568584
TCGA-EL-A3TB-11	0.581066
TCGA-FY-A3TY-11	0.585217
TCGA-EL-A3T0-11	0.625436
TCGA-BJ-A2N8-11	0.75486
TCGA-BJ-A2NA-11	0.719287
TCGA-EM-A1CS-11	0.701546
TCGA-EL-A3ZR-11	0.491567
TCGA-EL-A3ZS-11	1
TCGA-EM-A1CW-11	0.824772
TCGA-ET-A2MX-11	0.654048
TCGA-EL-A3ZT-11	0.590865
TCGA-KS-A41L-11	0.618595
TCGA-KS-A41J-11	0.566275
TCGA-EM-A1CT-11	0.67847
TCGA-E8-A2JQ-11	0.777476
TCGA-EL-A3N3-11	0.736112
TCGA-EL-A3H1-11	0.619608
TCGA-EL-A3T1-11	0.512518
TCGA-EL-A3MW-11	0.541708
TCGA-EL-A3ZM-11	0.643415
TCGA-BJ-A2N9-11	0.714116
TCGA-EL-A3ZL-11	0.579935
TCGA-EL-A3GZ-11	0.630376
TCGA-EL-A3ZK-11	0.619643

## Sheet: ZCCHC12 correlates with tumour 
Table S8. Tumor stemness differences in THCA and their correlation with ZCCHC12
TCGA-ET-A2N0-01	0.702598
TCGA-FE-A3PA-01	0.27746
TCGA-EM-A1YC-01	0.811266
TCGA-IM-A420-01	0.458576
TCGA-FY-A76V-01	0.0573846
TCGA-EM-A2CR-01	0.518227
TCGA-EM-A3FO-01	0.36407
TCGA-EL-A3H7-01	0.24565
TCGA-KS-A4I5-01	0.22685
TCGA-MK-A84Z-01	0.311574
TCGA-EM-A4FM-01	0.320529
TCGA-BJ-A190-01	0.637697
TCGA-BJ-A0ZC-01	0.572157
TCGA-EM-A4FO-01	0.31891
TCGA-DJ-A2PO-01	0.420402
TCGA-EL-A3ZT-01	0.238153
TCGA-DJ-A3V9-01	0.162382
TCGA-ET-A3DV-01	0.65057
TCGA-FY-A3NN-01	0.628853
TCGA-DJ-A13O-01	0.490125
TCGA-EM-A1CW-01	0.644034
TCGA-E8-A436-01	0.330643
TCGA-DJ-A1QO-01	0.437873
TCGA-E3-A3E2-01	0.612924
TCGA-E8-A416-01	0.249156
TCGA-EL-A3GV-01	0.314453
TCGA-ET-A2N3-01	0.46802
TCGA-BJ-A2NA-01	0.401731
TCGA-DJ-A4V0-01	0.316659
TCGA-EL-A3CM-01	0.233373
TCGA-EM-A3O3-01	0.6576
TCGA-FY-A3TY-01	0.133601
TCGA-EL-A3T6-01	0.473853
TCGA-ET-A3BO-01	0.40723
TCGA-EM-A2OX-01	0.237781
TCGA-EL-A3D6-01	0.394783
TCGA-J8-A3YF-01	0.403077
TCGA-CE-A481-01	0.159032
TCGA-E8-A419-01	0.482601
TCGA-ET-A25G-01	0.472634
TCGA-E8-A438-01	0.16284
TCGA-E3-A3E0-01	0.451191
TCGA-DE-A0Y3-01	0.478199
TCGA-EM-A3FR-01	0.467871
TCGA-ET-A3DS-01	0.550369
TCGA-DJ-A4UL-01	0.52504
TCGA-EM-A2CK-01	0.474878
TCGA-J8-A3O1-01	0.687578
TCGA-FE-A237-01	0.343353
TCGA-BJ-A3PT-01	0.386447
TCGA-EM-A3O8-01	0.490287
TCGA-H2-A2K9-01	0.346308
TCGA-DJ-A2Q7-01	0.42044
TCGA-EL-A3CT-01	0.299305
TCGA-DJ-A1QM-01	0.181557
TCGA-H2-A3RH-01	0.315421
TCGA-IM-A41Z-01	0.698317
TCGA-EM-A22O-01	0.722983
TCGA-DJ-A4UR-01	0.203537
TCGA-IM-A3EB-01	0.570354
TCGA-EL-A3ZN-01	0.105437
TCGA-FK-A3SH-01	0.381601
TCGA-EL-A3ZS-01	0.201872
TCGA-EL-A3GR-01	0.0599369
TCGA-DE-A3KN-01	0.10749
TCGA-EM-A3AI-01	0.48142
TCGA-ET-A39R-01	0.437904
TCGA-DJ-A13X-01	0.34789
TCGA-ET-A25O-01	0.629895
TCGA-EM-A1YD-01	0.206242
TCGA-FE-A22Z-01	0.356254
TCGA-BJ-A2N8-01	0.565281
TCGA-DJ-A13W-01	0.354216
TCGA-EL-A3N2-01	0.387299
TCGA-EM-A4FF-01	0.37221
TCGA-EL-A3CU-01	0.370587
TCGA-J8-A3YD-01	0.425277
TCGA-FY-A3YR-01	0.391578
TCGA-DJ-A2PV-01	0.123666
TCGA-KS-A4I3-01	0.447136
TCGA-EM-A1CV-01	0.48416
TCGA-BJ-A3PR-01	0.669329
TCGA-EM-A3O6-01	0.581731
TCGA-BJ-A45J-01	0.260258
TCGA-BJ-A28V-01	0.401794
TCGA-EM-A3FP-01	0.483371
TCGA-EM-A3SY-01	1
TCGA-FK-A3S3-01	0.298944
TCGA-FY-A3NP-01	0.589413
TCGA-E8-A242-01	0.3361
TCGA-FY-A3BL-01	0.546745
TCGA-EL-A3CR-01	0.174143
TCGA-DJ-A13P-01	0.377076
TCGA-FE-A239-01	0.525837
TCGA-DE-A69K-01	0.322142
TCGA-E8-A418-01	0.730261
TCGA-EL-A3D0-01	0.266126
TCGA-EL-A3D4-01	0.16502
TCGA-MK-A4N6-01	0.325096
TCGA-E8-A437-01	0.280343
TCGA-EM-A3FL-01	0.784778
TCGA-J8-A3YH-01	0.363186
TCGA-E8-A433-01	0.388633
TCGA-EL-A4K9-01	0.265197
TCGA-E8-A2EA-01	0.455346
TCGA-ET-A3BU-01	0.261541
TCGA-EL-A4K0-01	0.116644
TCGA-EM-A2CM-01	0.6898
TCGA-EL-A4K1-01	0.363707
TCGA-EL-A3CL-01	0.2995
TCGA-DJ-A2PR-01	0.375767
TCGA-DJ-A2QA-01	0.502335
TCGA-DJ-A3VJ-01	0.265703
TCGA-ET-A3DO-01	0.479815
TCGA-EM-A2CN-01	0.468923
TCGA-DJ-A3UV-01	0.164309
TCGA-J8-A3O2-06	0.454532
TCGA-IM-A4EB-01	0.285241
TCGA-EM-A3OA-01	0.735958
TCGA-EL-A3MW-01	0.468746
TCGA-FE-A234-01	0.418712
TCGA-EM-A2CQ-01	0.505588
TCGA-FY-A40K-01	0.259969
TCGA-ET-A40P-01	0.341345
TCGA-DJ-A1QF-01	0.370261
TCGA-EL-A4KH-01	0.43945
TCGA-ET-A3BV-01	0.0327115
TCGA-CE-A27D-01	0.482383
TCGA-EL-A4KI-01	0.586655
TCGA-KS-A4I7-01	0.30101
TCGA-EM-A3SZ-01	0.571776
TCGA-DJ-A3VB-01	0.470353
TCGA-DJ-A2PP-01	0.640106
TCGA-DJ-A4V4-01	0.385209
TCGA-EL-A4KG-01	0.466292
TCGA-FE-A3PD-01	0.38535
TCGA-ET-A40R-01	0.368082
TCGA-EM-A4FK-01	0.679726
TCGA-DJ-A2PU-01	0.358027
TCGA-J8-A3YG-01	0.304099
TCGA-BJ-A2N9-01	0.901014
TCGA-EM-A22Q-01	0.601348
TCGA-FE-A23A-01	0.428071
TCGA-EL-A3T2-01	0.381158
TCGA-ET-A39K-01	0.446285
TCGA-H2-A26U-01	0.257835
TCGA-EM-A3AO-01	0.377379
TCGA-BJ-A45H-01	0.314926
TCGA-J8-A3O0-01	0.35828
TCGA-EM-A2P2-01	0.356564
TCGA-IM-A3ED-01	0.323142
TCGA-BJ-A18Y-01	0.32173
TCGA-ET-A40S-01	0.481588
TCGA-EL-A4K7-01	0.570335
TCGA-EL-A3GZ-01	0.346995
TCGA-BJ-A0ZJ-01	0.440671
TCGA-BJ-A0ZF-01	0.515086
TCGA-FE-A232-01	0.390597
TCGA-DJ-A3V4-01	0.412842
TCGA-DJ-A3UP-01	0.417475
TCGA-DJ-A1QN-01	0.359512
TCGA-EM-A3AJ-01	0.448533
TCGA-EM-A1YA-01	0.76181
TCGA-FY-A3R8-01	0.459942
TCGA-BJ-A45K-01	0.17208
TCGA-DJ-A3V2-01	0.490157
TCGA-J8-A3O2-01	0.29722
TCGA-ET-A3BN-01	0.271136
TCGA-DJ-A3UU-01	0.250203
TCGA-DJ-A3UQ-01	0.254829
TCGA-DJ-A3V3-01	0.309189
TCGA-FY-A3R9-01	0.60356
TCGA-KS-A41J-01	0.659485
TCGA-EL-A4K2-01	0.337973
TCGA-FY-A3WA-01	0.416751
TCGA-DJ-A13S-01	0.620962
TCGA-EM-A2P1-06	0.529476
TCGA-DJ-A3US-01	0.405303
TCGA-ET-A2N4-01	0.447894
TCGA-ET-A39N-01	0.664466
TCGA-EM-A4FV-01	0.415461
TCGA-BJ-A0ZA-01	0.546145
TCGA-BJ-A0Z0-01	0.5795
TCGA-DJ-A4V5-01	0.250715
TCGA-EL-A3H5-01	0.0999224
TCGA-EL-A3T9-01	0.244528
TCGA-J8-A42S-01	0.147873
TCGA-EM-A3FM-01	0.504891
TCGA-ET-A40T-01	0.181616
TCGA-J8-A4HW-01	0.280114
TCGA-ET-A25J-01	0.535834
TCGA-BJ-A28R-01	0.416913
TCGA-BJ-A3F0-01	0.485967
TCGA-EL-A3H2-01	0.654322
TCGA-E3-A3E1-01	0.533054
TCGA-FK-A4UB-01	0.212592
TCGA-QD-A8IV-01	0.43509
TCGA-DJ-A2QC-01	0.46722
TCGA-EL-A3CN-01	0.425722
TCGA-DJ-A3UM-01	0.288454
TCGA-BJ-A291-01	0.42274
TCGA-EL-A3GY-01	0.377376
TCGA-DJ-A2PW-01	0.358233
TCGA-EM-A2CS-01	0.256216
TCGA-EL-A3ZM-01	0.524113
TCGA-E8-A417-01	0.540211
TCGA-EL-A3MZ-01	0.352003
TCGA-FE-A235-01	0.235117
TCGA-CE-A483-01	0.506253
TCGA-BJ-A45C-01	0.335172
TCGA-KS-A41F-01	0.699293
TCGA-DJ-A3V0-01	0.251526
TCGA-ET-A39S-01	0.269666
TCGA-EL-A3TB-01	0.421478
TCGA-E8-A432-01	0.297661
TCGA-ET-A3BT-01	0.491397
TCGA-DJ-A3VL-01	0.383444
TCGA-ET-A25K-01	0.165637
TCGA-ET-A3BS-01	0.564064
TCGA-BJ-A45G-01	0.363558
TCGA-H2-A421-01	0.353367
TCGA-DE-A0XZ-01	0.328345
TCGA-BJ-A45I-01	0.37032
TCGA-KS-A41I-01	0.349122
TCGA-DJ-A2PZ-01	0.458609
TCGA-DJ-A3V7-01	0.515335
TCGA-EL-A3GO-01	0.463096
TCGA-EM-A2CL-01	0.532128
TCGA-MK-A4N7-01	0.324879
TCGA-DJ-A2Q4-01	0.390189
TCGA-EL-A3T7-01	0.291844
TCGA-DJ-A3UR-01	0.408849
TCGA-CE-A13K-01	0.166854
TCGA-J8-A4HY-01	0.592837
TCGA-DJ-A3V5-01	0.332232
TCGA-DJ-A1QQ-01	0.225348
TCGA-EL-A3H3-01	0.696715
TCGA-DJ-A4UP-01	0.245661
TCGA-DE-A7U5-01	0.15502
TCGA-EL-A4K6-01	0.491454
TCGA-EL-A3MY-01	0.168135
TCGA-DJ-A3VA-01	0.403891
TCGA-DJ-A4UT-01	0.162004
TCGA-ET-A25I-01	0.603051
TCGA-BJ-A45E-01	0.591601
TCGA-E8-A3X7-01	0.450061
TCGA-DJ-A1QH-01	0.429692
TCGA-BJ-A0ZB-01	0.517022
TCGA-BJ-A3PU-01	0.675189
TCGA-EM-A2CT-01	0.678341
TCGA-BJ-A192-01	0.620779
TCGA-E8-A414-01	0.12151
TCGA-FY-A3ON-01	0.263781
TCGA-BJ-A28W-01	0.912804
TCGA-EL-A3CX-01	0.606026
TCGA-DJ-A4V2-01	0.34734
TCGA-ET-A39M-01	0.448878
TCGA-DJ-A3VM-01	0.585801
TCGA-BJ-A28S-01	0.405256
TCGA-FK-A3SB-01	0.22618
TCGA-H2-A422-01	0.430731
TCGA-DJ-A3UT-01	0.438279
TCGA-BJ-A0Z5-01	0.595033
TCGA-EM-A4FN-01	0.53691
TCGA-BJ-A4O9-01	0.71578
TCGA-FK-A3SD-01	0.553939
TCGA-FY-A40L-01	0.412101
TCGA-ET-A3DW-01	0.612419
TCGA-FY-A4B0-01	0.493521
TCGA-ET-A2MZ-01	0.40988
TCGA-E8-A2JQ-01	0.439159
TCGA-DJ-A3VF-01	0.166683
TCGA-ET-A39L-01	0.327227
TCGA-EM-A3AP-01	0.313112
TCGA-MK-A4N9-01	0.247644
TCGA-EM-A22I-01	0.337766
TCGA-DJ-A2PN-01	0.30722
TCGA-E3-A3DY-01	0.515963
TCGA-DJ-A3VD-01	0.252202
TCGA-DJ-A2Q3-01	0.390885
TCGA-ET-A3DP-01	0.189297
TCGA-L6-A4EU-01	0.371625
TCGA-EL-A4JW-01	0.312626
TCGA-E8-A415-01	0.402289
TCGA-BJ-A3EZ-01	0.571226
TCGA-ET-A3DU-01	0.423703
TCGA-DJ-A3UZ-01	0.313415
TCGA-FK-A3SE-01	0.312402
TCGA-DJ-A2PY-01	0.389768
TCGA-DE-A69J-01	0.465438
TCGA-EL-A3GP-01	0.266753
TCGA-DJ-A3UO-01	0.364
TCGA-EL-A4K4-01	0.174473
TCGA-ET-A39I-01	0.47977
TCGA-DE-A4MB-01	0.278947
TCGA-EL-A3CZ-01	0.446671
TCGA-DJ-A1QG-01	0.640894
TCGA-GE-A2C6-01	0.207651
TCGA-DJ-A3UN-01	0.415852
TCGA-BJ-A0YZ-01	0.422393
TCGA-EL-A3ZP-01	0.204636
TCGA-J8-A3YE-01	0.679751
TCGA-DJ-A13T-01	0.355158
TCGA-EM-A3FQ-01	0.387796
TCGA-DE-A4MD-06	0.436515
TCGA-EL-A3CP-01	0.279011
TCGA-DJ-A3UY-01	0.279825
TCGA-EM-A3O7-01	0.44103
TCGA-FE-A230-01	0.495082
TCGA-EL-A3H1-01	0.426265
TCGA-IM-A3U2-01	0.396581
TCGA-DJ-A2PS-01	0.367264
TCGA-EM-A2CU-01	0.195025
TCGA-EM-A1CU-01	0.284485
TCGA-ET-A4KN-01	0.606041
TCGA-ET-A40Q-01	0.443224
TCGA-EL-A3ZH-01	0.361469
TCGA-ET-A3BQ-01	0.251775
TCGA-FY-A3R7-01	0.264249
TCGA-ET-A3BX-01	0.529953
TCGA-DJ-A2Q2-01	0.524673
TCGA-DJ-A1QE-01	0.381588
TCGA-EL-A3ZL-01	0.126566
TCGA-EM-A2CS-06	0.367174
TCGA-DJ-A13U-01	0.5345
TCGA-DJ-A2Q5-01	0.489724
TCGA-EL-A4JZ-01	0.157283
TCGA-EM-A22N-01	0.66353
TCGA-BJ-A2N7-01	0.505125
TCGA-J8-A4HW-06	0.275395
TCGA-DJ-A1QD-01	0.387785
TCGA-BJ-A0ZE-01	0.807374
TCGA-EM-A4FH-01	0.516267
TCGA-BJ-A45D-01	0.45243
TCGA-ET-A2MX-01	0.646468
TCGA-EL-A3CW-01	0.454737
TCGA-EM-A3AN-01	0.400063
TCGA-CE-A482-01	0.192373
TCGA-BJ-A0ZH-01	0.489166
TCGA-EM-A3ST-01	0.646222
TCGA-BJ-A290-01	0.531147
TCGA-FY-A3I5-01	0.44947
TCGA-FY-A4B4-01	0.282516
TCGA-FY-A4B3-01	0.0345742
TCGA-FY-A3RA-01	0.448676
TCGA-DJ-A2QB-01	0.644542
TCGA-ET-A39P-01	0.46847
TCGA-DE-A0Y2-01	0.331515
TCGA-BJ-A0ZG-01	0.430828
TCGA-DJ-A2PQ-01	0.457476
TCGA-EL-A3ZR-01	0.461874
TCGA-DJ-A3VG-01	0.280846
TCGA-E8-A434-01	0.447944
TCGA-DJ-A2Q6-01	0.253551
TCGA-DJ-A2Q1-01	0.445515
TCGA-DJ-A13R-01	0.725184
TCGA-EM-A2P3-01	0.251803
TCGA-BJ-A28T-01	0.449328
TCGA-ET-A39O-01	0.493039
TCGA-EL-A3T1-01	0.373714
TCGA-EL-A3CO-01	0.112291
TCGA-E8-A44M-01	0.404864
TCGA-EM-A1CS-01	0.324872
TCGA-CE-A485-01	0
TCGA-BJ-A0Z3-01	0.505802
TCGA-EL-A3ZK-01	0.29047
TCGA-EM-A3FJ-01	0.392683
TCGA-DJ-A4UQ-01	0.158766
TCGA-E8-A44K-01	0.405525
TCGA-KS-A4IC-01	0.457649
TCGA-EM-A1YB-01	0.925726
TCGA-EL-A3H8-01	0.352774
TCGA-BJ-A191-01	0.490737
TCGA-FY-A2QD-01	0.557751
TCGA-DJ-A2PT-01	0.435364
TCGA-FY-A40M-01	0.388608
TCGA-EM-A2OZ-01	0.577774
TCGA-BJ-A28X-01	0.359399
TCGA-EL-A3GW-01	0.548162
TCGA-BJ-A0Z2-01	0.538362
TCGA-EM-A3FQ-06	0.359635
TCGA-IM-A41Y-01	0.434561
TCGA-DJ-A13L-01	0.38843
TCGA-DO-A1JZ-01	0.292186
TCGA-ET-A25L-01	0.247186
TCGA-EL-A3MX-01	0.385123
TCGA-FY-A3W9-01	0.425313
TCGA-ET-A2MY-01	0.615674
TCGA-EL-A3T8-01	0.211991
TCGA-ET-A25R-01	0.439219
TCGA-DJ-A1QL-01	0.401906
TCGA-L6-A4ET-01	0.406682
TCGA-ET-A25P-01	0.443332
TCGA-E3-A3E5-01	0.350874
TCGA-EM-A3FK-01	0.38405
TCGA-EL-A3GU-01	0.136523
TCGA-H2-A3RI-01	0.511658
TCGA-DJ-A3V8-01	0.444642
TCGA-EM-A3SU-06	0.453813
TCGA-DJ-A2Q9-01	0.249802
TCGA-EL-A3CV-01	0.316721
TCGA-BJ-A45F-01	0.477621
TCGA-KS-A41L-01	0.511106
TCGA-J8-A3NZ-01	0.505913
TCGA-DO-A1K0-01	0.398049
TCGA-E3-A3DZ-01	0.494548
TCGA-EM-A3SX-01	0.29469
TCGA-DJ-A3VI-01	0.539932
TCGA-ET-A39J-01	0.26391
TCGA-DJ-A1QI-01	0.364993
TCGA-EL-A3N3-01	0.345571
TCGA-L6-A4EP-01	0.373205
TCGA-DJ-A13V-01	0.380244
TCGA-DE-A2OL-01	0.387231
TCGA-FY-A3I4-01	0.0585403
TCGA-EM-A4FQ-01	0.408952
TCGA-EM-A2P1-01	0.560802
TCGA-EM-A2OV-01	0.731331
TCGA-EL-A3GQ-01	0.22024
TCGA-EL-A4JV-01	0.329165
TCGA-EL-A3T3-01	0.25108
TCGA-CE-A3ME-01	0.544345
TCGA-DJ-A3VK-01	0.361739
TCGA-EL-A3D1-01	0.353768
TCGA-BJ-A0Z9-01	0.589279
TCGA-E3-A3E3-01	0.554153
TCGA-KS-A4ID-01	0.532494
TCGA-FY-A40N-01	0.373571
TCGA-BJ-A18Z-01	0.197694
TCGA-EL-A3ZO-01	0.393635
TCGA-FE-A233-01	0.481305
TCGA-DJ-A4UW-01	0.0818146
TCGA-DE-A4M8-01	0.310814
TCGA-EM-A3AL-01	0.387352
TCGA-J8-A3YH-06	0.347487
TCGA-FE-A236-01	0.503373
TCGA-4C-A93U-01	0.192637
TCGA-BJ-A28Z-01	0.355299
TCGA-EM-A3AK-01	0.292462
TCGA-EL-A3CS-01	0.518076
TCGA-FY-A3R6-01	0.327545
TCGA-KS-A4I9-01	0.422845
TCGA-EM-A2CJ-01	0.447052
TCGA-CE-A484-01	0.266709
TCGA-ET-A25M-01	0.28554
TCGA-DO-A2HM-01	0.470964
TCGA-DJ-A13M-01	0.649403
TCGA-ET-A3BP-01	0.498169
TCGA-EL-A3TA-01	0.258628
TCGA-EM-A22J-01	0.635276
TCGA-IM-A3U3-01	0.482629
TCGA-EM-A2CP-01	0.667913
TCGA-EM-A22L-01	0.54754
TCGA-DE-A4M9-01	0.306694
TCGA-DJ-A3UK-01	0.295217
TCGA-DE-A4MC-01	0.50152
TCGA-EL-A3T0-01	0.0729321
TCGA-ET-A3BW-01	0.455464
TCGA-EL-A3ZQ-01	0.612236
TCGA-E8-A413-01	0.118403
TCGA-DJ-A3V6-01	0.386543
TCGA-EM-A22P-01	0.189257
TCGA-FK-A3SG-01	0.269084
TCGA-DJ-A2Q0-01	0.861309
TCGA-BJ-A4O8-01	0.187237
TCGA-EM-A22M-01	0.4408
TCGA-DE-A4MA-01	0.607642
TCGA-DE-A4MD-01	0.694495
TCGA-EL-A3CY-01	0.228512
TCGA-FE-A3PB-01	0.217497
TCGA-EM-A3AR-01	0.304009
TCGA-EM-A3OB-01	0.456115
TCGA-DJ-A3UX-01	0.378899
TCGA-KS-A4I1-01	0.510794
TCGA-EL-A3ZG-01	0.551439
TCGA-ET-A2N5-01	0.479457
TCGA-ET-A3DT-01	0.458486
TCGA-EL-A3GX-01	0.602449
TCGA-EM-A2OW-01	0.529387
TCGA-EM-A2CO-01	0.69926
TCGA-EM-A22K-01	0.334755
TCGA-DJ-A3VE-01	0.226692
TCGA-BJ-A2P4-01	0.39164
TCGA-EM-A4FU-01	0.358924
TCGA-FE-A3PC-01	0.315192
TCGA-EM-A3SU-01	0.652917
TCGA-EM-A4G1-01	0.546259
TCGA-KS-A4IB-01	0.625092
TCGA-ET-A3DR-01	0.282307
TCGA-EM-A2OY-01	0.966091
TCGA-ET-A39T-01	0.678539
TCGA-EM-A1YE-01	0.504362
TCGA-ET-A25N-01	0.209209
TCGA-CE-A3MD-01	0.314137
TCGA-L6-A4EQ-01	0.417412
TCGA-EM-A3FN-01	0.557826
TCGA-FY-A3NM-01	0.563451
TCGA-DJ-A2PX-01	0.361199
TCGA-EM-A2P0-01	0.320726
TCGA-EL-A3GS-01	0.510456
TCGA-EM-A1CT-01	0.447194
TCGA-EM-A4FR-01	0.327591
TCGA-EL-A4KD-01	0.072465
TCGA-ET-A4KQ-01	0.267535
TCGA-FE-A231-01	0.782662
TCGA-EL-A3H4-01	0.359162
TCGA-FE-A238-01	0.554592
TCGA-DJ-A3UW-01	0.392785
TCGA-EM-A3AQ-01	0.305806
TCGA-EL-A4JX-01	0.467287
TCGA-EL-A3D5-01	0.668522
TCGA-ET-A3DQ-01	0.214143
