# Supplementary material for: Differential expression of zinc finger CCHC-type superfamily proteins in thyroid carcinoma and their associations with tumor immunity
Source: Thyroid Res. 2023 Oct 17;16:42. doi: 10.1186/s13044-023-00185-1 (PMC10580525; doi:10.1186/s13044-023-00185-1)
Supplement: Supplementary file 8 — Supplementary Material 8: Table S8. Tumor stemness differences in THCA and their correlation with ZCCHC12 [file 13044_2023_185_MOESM8_ESM.xlsx]

## Sheet: GO
Table S8. GO analysis and PPI network of the ZCCHC gene family
ID	Description	BgRatio	pvalue	p.adjust	qvalue	geneID	Count	ONT
GO:0008270	zinc ion binding	799/16967	1.36731e-15	3.28155e-14	1.72713e-14	ZCCHC2/ZCCHC3/ZCCHC4/ZCCHC7/ZCCHC8/ZCCHC9/ZCCHC10/ZCCHC12/ZCCHC13/ZCCHC14/ZCCHC17/ZCCHC24	12	MF
GO:0046914	transition metal ion binding	1051/16967	3.6893e-14	4.42716e-13	2.33008e-13	ZCCHC2/ZCCHC3/ZCCHC4/ZCCHC7/ZCCHC8/ZCCHC9/ZCCHC10/ZCCHC12/ZCCHC13/ZCCHC14/ZCCHC17/ZCCHC24	12	MF
GO:0046872	metal ion binding	4068/16967	8.52605e-09	6.28823e-08	3.30959e-08	ZCCHC2/ZCCHC3/ZCCHC4/ZCCHC7/ZCCHC8/ZCCHC9/ZCCHC10/ZCCHC12/ZCCHC13/ZCCHC14/ZCCHC17/ZCCHC18/ZCCHC24	13	MF
GO:0043169	cation binding	4133/16967	1.04804e-08	6.28823e-08	3.30959e-08	ZCCHC2/ZCCHC3/ZCCHC4/ZCCHC7/ZCCHC8/ZCCHC9/ZCCHC10/ZCCHC12/ZCCHC13/ZCCHC14/ZCCHC17/ZCCHC18/ZCCHC24	13	MF
GO:0003676	nucleic acid binding	3955/16967	2.59376e-07	1.245e-06	6.55265e-07	ZCCHC2/ZCCHC3/ZCCHC4/ZCCHC7/ZCCHC8/ZCCHC9/ZCCHC10/ZCCHC12/ZCCHC13/ZCCHC14/ZCCHC17/ZCCHC24	12	MF
GO:0003723	RNA binding	1850/16967	0.00145017	0.00580066	0.00305298	ZCCHC3/ZCCHC7/ZCCHC8/ZCCHC9/ZCCHC17/ZCCHC24	6	MF
GO:0005730	nucleolus	1369/18675	0.000840544	0.00843103	0.00591651	ZCCHC4/ZCCHC7/ZCCHC9/ZCCHC17	4	CC
GO:0031499	TRAMP complex	3/18675	0.00112414	0.00843103	0.00591651	ZCCHC8	1	CC
GO:0016433	rRNA (adenine) methyltransferase activity	5/16967	0.00382555	0.0131162	0.00690325	ZCCHC4	1	MF
GO:0008649	rRNA methyltransferase activity	12/16967	0.00915863	0.024423	0.0128542	ZCCHC4	1	MF
GO:0140102	catalytic activity, acting on a rRNA	12/16967	0.00915863	0.024423	0.0128542	ZCCHC4	1	MF
GO:0035091	phosphatidylinositol binding	217/16967	0.0115744	0.0277786	0.0146203	ZCCHC2/ZCCHC14	2	MF
GO:0031981	nuclear lumen	4454/18675	0.0104088	0.052044	0.0365221	ZCCHC4/ZCCHC7/ZCCHC8/ZCCHC9/ZCCHC17	5	CC
GO:0044428	nuclear part	4801/18675	0.0145742	0.0546534	0.0383533	ZCCHC4/ZCCHC7/ZCCHC8/ZCCHC9/ZCCHC17	5	CC
GO:0005543	phospholipid binding	363/16967	0.0304704	0.0664809	0.03499	ZCCHC2/ZCCHC14	2	MF
GO:0008173	RNA methyltransferase activity	48/16967	0.036172	0.072344	0.0380758	ZCCHC4	1	MF
GO:0071013	catalytic step 2 spliceosome	82/18675	0.0303392	0.0910175	0.0638719	ZCCHC8	1	CC

## Sheet: PPI(PINA)
Table S9. GO analysis and PPI network of the ZCCHC gene family
Q9C0B9	pp	Q8IUR7
Q9C0B9	pp	Q9H871
Q9C0B9	pp	Q69YN4
Q9NUD5	pp	Q8TE30
Q9NUD5	pp	Q96AK3
Q9NUD5	pp	Q86VP6
Q9NUD5	pp	Q9HC52
Q9NUD5	pp	P47902
Q9NUD5	pp	Q13618
Q9NUD5	pp	Q12926
Q9NUD5	pp	Q8IYD1
Q9NUD5	pp	Q9NWT6
Q9NUD5	pp	Q16666
Q9NUD5	pp	Q12905
Q9NUD5	pp	Q9UN81
Q9NUD5	pp	P41218
Q9NUD5	pp	Q9BYG3
Q9NUD5	pp	Q9H074
Q9NUD5	pp	P12004
Q9NUD5	pp	Q6IQ23
Q9NUD5	pp	P63244
Q9NUD5	pp	Q9H0F6
Q9NUD5	pp	Q8NFZ5
Q9NUD5	pp	P26368
Q9NUD5	pp	B0UZZ8
Q9NUD5	pp	Q86VM9
Q9H5U6	pp	Q5TC82
Q9H5U6	pp	P62753
Q8N3Z6	pp	Q59GP6
Q8N3Z6	pp	Q9H257
Q8N3Z6	pp	Q92793
Q8N3Z6	pp	Q8WYQ5
Q8N3Z6	pp	P20042
Q8N3Z6	pp	Q15717
Q8N3Z6	pp	Q8TF65
Q8N3Z6	pp	P22492
Q8N3Z6	pp	P62805
Q8N3Z6	pp	Q7Z4V5
Q8N3Z6	pp	Q00341
Q8N3Z6	pp	Q9HAQ2
Q8N3Z6	pp	Q5T753
Q8N3Z6	pp	P07948
Q8N3Z6	pp	P46013
Q8N3Z6	pp	Q9HC98
Q8N3Z6	pp	Q9UGY1
Q8N3Z6	pp	P06748
Q8N3Z6	pp	Q9NR12
Q8N3Z6	pp	P78364
Q8N3Z6	pp	Q8NA72
Q8N3Z6	pp	Q9NQ55
Q8N3Z6	pp	Q15397
Q8N3Z6	pp	P78317
Q8N3Z6	pp	P62906
Q8N3Z6	pp	P50914
Q8N3Z6	pp	P46779
Q8N3Z6	pp	Q96HI0
Q8N3Z6	pp	Q8TAD8
Q8N3Z6	pp	P63165
Q8N3Z6	pp	P61956
Q8N3Z6	pp	Q5XG87
Q8N3Z6	pp	Q8NDF8
Q8N3Z6	pp	Q8WV44
Q8N3Z6	pp	P63279
Q8N3Z6	pp	P17029
Q8N3Z6	pp	P15622
Q8N3Z6	pp	Q9NWK9
Q6NZY4	pp	P68032
Q6NZY4	pp	O00468
Q6NZY4	pp	P05067
Q6NZY4	pp	Q676U5
Q6NZY4	pp	P35226
Q6NZY4	pp	P38398
Q6NZY4	pp	Q13901
Q6NZY4	pp	P04040
Q6NZY4	pp	Q12873
Q6NZY4	pp	Q14839
Q6NZY4	pp	P49760
Q6NZY4	pp	Q13618
Q6NZY4	pp	Q9NRR4
Q6NZY4	pp	P03372
Q6NZY4	pp	Q92731
Q6NZY4	pp	Q01844
Q6NZY4	pp	Q9Y3B2
Q6NZY4	pp	Q9NQT5
Q6NZY4	pp	Q15024
Q6NZY4	pp	Q96B26
Q6NZY4	pp	Q15910
Q6NZY4	pp	P35637
Q6NZY4	pp	P04062
Q6NZY4	pp	P62805
Q6NZY4	pp	P52597
Q6NZY4	pp	O15357
Q6NZY4	pp	Q8TB96
Q6NZY4	pp	Q9NQ29
Q6NZY4	pp	P43243
Q6NZY4	pp	Q13465
Q6NZY4	pp	P46013
Q6NZY4	pp	P42285
Q6NZY4	pp	P01106
Q6NZY4	pp	P52298
Q6NZY4	pp	P04629
Q6NZY4	pp	Q15646
Q6NZY4	pp	Q9H4M7
Q6NZY4	pp	P30153
Q6NZY4	pp	P63151
Q6NZY4	pp	Q00005
Q6NZY4	pp	Q9Y2T4
Q6NZY4	pp	Q66LE6
Q6NZY4	pp	O75400
Q6NZY4	pp	P25786
Q6NZY4	pp	P28072
Q6NZY4	pp	P35998
Q6NZY4	pp	P43686
Q6NZY4	pp	P62195
Q6NZY4	pp	Q9UNM6
Q6NZY4	pp	Q6K0P9
Q6NZY4	pp	P57052
Q6NZY4	pp	Q9BQ04
Q6NZY4	pp	Q9Y580
Q6NZY4	pp	Q9HBD1
Q6NZY4	pp	P07949
Q6NZY4	pp	Q9BRS2
Q6NZY4	pp	Q99496
Q6NZY4	pp	P27694
Q6NZY4	pp	P15927
Q6NZY4	pp	P35244
Q6NZY4	pp	Q9NRC8
Q6NZY4	pp	P37840
Q6NZY4	pp	P08621
Q6NZY4	pp	P48431
Q6NZY4	pp	Q9UH99
Q6NZY4	pp	Q92804
Q6NZY4	pp	Q96FV9
Q6NZY4	pp	O14530
Q6NZY4	pp	Q01081
Q6NZY4	pp	P26368
Q6NZY4	pp	Q96RU2
Q6NZY4	pp	Q93009
Q6NZY4	pp	O14980
Q6NZY4	pp	P31946
Q6NZY4	pp	Q04917
Q6NZY4	pp	Q8WU90
Q6NZY4	pp	Q86VM9
Q8N567	pp	Q8IW93
Q8N567	pp	Q7RTS1
Q8N567	pp	Q66K89
Q8N567	pp	P03372
Q8N567	pp	Q92731
Q8N567	pp	Q5XUX0
Q8N567	pp	Q5T3I0
Q8N567	pp	P10412
Q8N567	pp	P22492
Q8N567	pp	P16104
Q8N567	pp	Q9BXY0
Q8N567	pp	Q9BYG3
Q8N567	pp	Q9NZM5
Q8N567	pp	P62136
Q8N567	pp	Q5TC82
Q8N567	pp	Q9HBD1
Q8N567	pp	Q9Y3L3
Q8N567	pp	Q15527
Q8N567	pp	Q8IXZ2
Q8N567	pp	Q9BSG1
Q8TBK6	pp	Q8N2N9
Q8TBK6	pp	P27695
Q8TBK6	pp	Q9NWB6
Q8TBK6	pp	Q8N7W2
Q8TBK6	pp	Q9NPI1
Q8TBK6	pp	Q6NZI2
Q8TBK6	pp	Q96MT8
Q8TBK6	pp	Q8NHQ1
Q8TBK6	pp	P51788
Q8TBK6	pp	P38432
Q8TBK6	pp	Q8WYA6
Q8TBK6	pp	O75553
Q8TBK6	pp	Q9UI36
Q8TBK6	pp	Q14562
Q8TBK6	pp	Q7Z7J5
Q8TBK6	pp	Q86Y13
Q8TBK6	pp	P68104
Q8TBK6	pp	Q8IYF1
Q8TBK6	pp	P11171
Q8TBK6	pp	Q92731
Q8TBK6	pp	Q15910
Q8TBK6	pp	Q8IZU0
Q8TBK6	pp	Q70Z53
Q8TBK6	pp	Q5VSY0
Q8TBK6	pp	Q16778
Q8TBK6	pp	Q9UGU5
Q8TBK6	pp	Q13123
Q8TBK6	pp	Q8NC69
Q8TBK6	pp	O00505
Q8TBK6	pp	Q8TBB1
Q8TBK6	pp	Q9Y383
Q8TBK6	pp	Q8N8X9
Q8TBK6	pp	Q96EZ8
Q8TBK6	pp	P50221
Q8TBK6	pp	Q96JN8
Q8TBK6	pp	P35240
Q8TBK6	pp	P49116
Q8TBK6	pp	O95848
Q8TBK6	pp	Q15365
Q8TBK6	pp	Q13526
Q8TBK6	pp	Q13427
Q8TBK6	pp	O43395
Q8TBK6	pp	Q8NAV1
Q8TBK6	pp	O75400
Q8TBK6	pp	Q9NZ81
Q8TBK6	pp	P61289
Q8TBK6	pp	P26045
Q8TBK6	pp	Q14498
Q8TBK6	pp	P35268
Q8TBK6	pp	O43290
Q8TBK6	pp	O00560
Q8TBK6	pp	Q9H190
Q8TBK6	pp	Q13435
Q8TBK6	pp	Q15427
Q8TBK6	pp	Q9UHJ3
Q8TBK6	pp	Q8IUQ4
Q8TBK6	pp	O95391
Q8TBK6	pp	Q8TAD8
Q8TBK6	pp	P62316
Q8TBK6	pp	Q96MF2
Q8TBK6	pp	O75558
Q8TBK6	pp	Q12800
Q8TBK6	pp	Q9NVV9
Q8TBK6	pp	Q01081
Q8TBK6	pp	O43829
Q8TBK6	pp	Q96BR9
Q8TBK6	pp	P04637
Q6PEW1	pp	Q8WTS1
Q6PEW1	pp	P05067
Q6PEW1	pp	Q92624
Q6PEW1	pp	P27449
Q6PEW1	pp	Q9UJ71
Q6PEW1	pp	Q92793
Q6PEW1	pp	Q13158
Q6PEW1	pp	Q969F0
Q6PEW1	pp	Q06787
Q6PEW1	pp	O00505
Q6PEW1	pp	P25800
Q6PEW1	pp	G5E962
Q6PEW1	pp	P43364
Q6PEW1	pp	Q96EZ8
Q6PEW1	pp	P20591
Q6PEW1	pp	P07205
Q6PEW1	pp	Q8ND90
Q6PEW1	pp	O75150
Q6PEW1	pp	Q96GQ5
Q6PEW1	pp	Q15797
Q6PEW1	pp	O43791
Q6PEW1	pp	P32856
Q6PEW1	pp	P63165
Q6PEW1	pp	P61956
Q6PEW1	pp	P55854
Q6PEW1	pp	O75478
Q6PEW1	pp	Q12800
Q6PEW1	pp	Q9BTV4
Q6PEW1	pp	Q9BSE2
Q6PEW1	pp	P01375
Q6PEW1	pp	Q7KZS0
Q8WYQ9	pp	O95817
Q8WYQ9	pp	A8MQ03
Q8WYQ9	pp	Q9H6Z9
Q8WYQ9	pp	Q15717
Q8WYQ9	pp	Q13643
Q8WYQ9	pp	Q9NWT6
Q8WYQ9	pp	P15173
Q8WYQ9	pp	P08651
Q8WYQ9	pp	Q58EX7
Q8WYQ9	pp	P86480
Q8WYQ9	pp	Q9H871
Q8WYQ9	pp	P84022
Q8WYQ9	pp	Q8NFZ5
Q8WYQ9	pp	Q63HR2
Q8WYQ9	pp	Q70EL1
Q8WYQ9	pp	Q69YN4
Q8WYQ9	pp	A0A024R8L2
Q9NP64	pp	Q9BXS5
Q9NP64	pp	P05067
Q9NP64	pp	Q676U5
Q9NP64	pp	Q8TDL5
Q9NP64	pp	O00555
Q9NP64	pp	P47902
Q9NP64	pp	P68400
Q9NP64	pp	P19784
Q9NP64	pp	P63172
Q9NP64	pp	Q08426
Q9NP64	pp	Q92731
Q9NP64	pp	P02792
Q9NP64	pp	P22492
Q9NP64	pp	Q9ULT8
Q9NP64	pp	Q9P2P5
Q9NP64	pp	O95714
Q9NP64	pp	P01876
Q9NP64	pp	Q9NXR8
Q9NP64	pp	P28290
Q9NP64	pp	P01591
Q9NP64	pp	Q6NYC1
Q9NP64	pp	O60341
Q9NP64	pp	Q1ED39
Q9NP64	pp	P28838
Q9NP64	pp	Q9BS40
Q9NP64	pp	Q9P0M6
Q9NP64	pp	P21741
Q9NP64	pp	P51608
Q9NP64	pp	Q8N5F7
Q9NP64	pp	O75052
Q9NP64	pp	P49116
Q9NP64	pp	P43354
Q9NP64	pp	Q96HA8
Q9NP64	pp	O60825
Q9NP64	pp	Q9H307
Q9NP64	pp	Q8WVV4
Q9NP64	pp	P61289
Q9NP64	pp	O95997
Q9NP64	pp	Q9BWF3
Q9NP64	pp	P78317
Q9NP64	pp	Q15287
Q9NP64	pp	O43159
Q9NP64	pp	O75446
Q9NP64	pp	O00560
Q9NP64	pp	Q9H190
Q9NP64	pp	A0MZ66
Q9NP64	pp	P78362
Q9NP64	pp	Q9UQ35
Q9NP64	pp	O43463
Q9NP64	pp	Q8NAP3
Q9NP64	pp	Q6PJT7
Q9NP64	pp	Q8IUH5
Q9NP64	pp	Q9ULU4
Q9NP64	pp	P17020
Q9NP64	pp	Q96ME7
P0CG32	pp	P00533
Q8N2G6	pp	Q5TC82
Q8N2G6	pp	Q14258
Q8N2G6	pp	Q69YN4
Q8N2G6	pp	Q9BQB6
