# Supplementary material for: Differential expression of zinc finger CCHC-type superfamily proteins in thyroid carcinoma and their associations with tumor immunity
Source: Thyroid Res. 2023 Oct 17;16:42. doi: 10.1186/s13044-023-00185-1 (PMC10580525; doi:10.1186/s13044-023-00185-1)
Supplement: Supplementary file 9 — Supplementary Material 9: Table S9. GO analysis and PPI network of the ZCCHC gene family [file 13044_2023_185_MOESM9_ESM.xlsx]

## Sheet: Sheet1
Table S10. Raw data of RT-PCR
NC	ΔCt		CA	ΔCt			ΔΔCt		-ΔΔCt		2^-ΔΔCt
ZCCHC2	7.95391		ZCCHC2	6.99095			-0.962957		0.962957		1.9493
ZCCHC2	7.85634		ZCCHC2	6.78808			-1.06826		1.06826		2.0969
ZCCHC2	7.74497		ZCCHC2	6.72253			-1.02245		1.02245		2.03136
ZCCHC2	7.88204		ZCCHC2	6.59002			-1.29202		1.29202		2.4487
ZCCHC2	7.88346		ZCCHC2	6.94648			-0.936979		0.936979		1.91452
ZCCHC2	7.71677		ZCCHC2	6.98539			-0.731377		0.731377		1.66022
ZCCHC2	7.59638		ZCCHC2	6.98541			-0.610971		0.610971		1.52729
ZCCHC2	7.79591		ZCCHC2	6.81304			-0.982868		0.982868		1.97639
ZCCHC2	7.803		ZCCHC2	6.90406			-0.898943		0.898943		1.8647
ZCCHC3	7.38061		ZCCHC3	7.14554			-0.235069		0.235069		1.17696
ZCCHC3	7.38325		ZCCHC3	7.14086			-0.242392		0.242392		1.18295
ZCCHC3	7.45478		ZCCHC3	7.14697			-0.307812		0.307812		1.23783
ZCCHC3	7.55912		ZCCHC3	7.30805			-0.25107		0.25107		1.19009
ZCCHC3	7.37203		ZCCHC3	7.33294			-0.0390873		0.0390873		1.02746
ZCCHC3	7.37119		ZCCHC3	7.64315			0.271969		-0.271969		0.828189
ZCCHC3	7.04421		ZCCHC3	7.31231			0.268099		-0.268099		0.830413
ZCCHC3	7.34129		ZCCHC3	7.19614			-0.145155		0.145155		1.10585
ZCCHC3	7.363		ZCCHC3	7.2941			-0.068904		0.068904		1.04892
ZCCHC4	9.76489		ZCCHC4	7.35907			-2.40582		2.40582		5.29938
ZCCHC4	9.67431		ZCCHC4	7.11186			-2.56245		2.56245		5.9071
ZCCHC4	9.53862		ZCCHC4	7.37143			-2.16719		2.16719		4.49148
ZCCHC4	9.61775		ZCCHC4	7.27448			-2.34327		2.34327		5.07451
ZCCHC4	9.42419		ZCCHC4	7.29261			-2.13157		2.13157		4.38195
ZCCHC4	9.3818		ZCCHC4	7.43346			-1.94834		1.94834		3.85931
ZCCHC4	9.38393		ZCCHC4	7.32422			-2.05972		2.05972		4.16905
ZCCHC4	9.65373		ZCCHC4	7.30941			-2.34432		2.34432		5.07822
ZCCHC4	9.555		ZCCHC4	7.10903			-2.44597		2.44597		5.44893
ZCCHC7	7.57732		ZCCHC7	6.29352			-1.2838		1.2838		2.43479
ZCCHC7	7.51941		ZCCHC7	6.02873			-1.49067		1.49067		2.8102
ZCCHC7	7.36028		ZCCHC7	6.03665			-1.32364		1.32364		2.50296
ZCCHC7	7.36954		ZCCHC7	6.19866			-1.17088		1.17088		2.25149
ZCCHC7	7.47048		ZCCHC7	6.21564			-1.25484		1.25484		2.38641
ZCCHC7	7.31585		ZCCHC7	6.31901			-0.996836		0.996836		1.99562
ZCCHC7	7.2136		ZCCHC7	6.26829			-0.945305		0.945305		1.9256
ZCCHC7	7.3957		ZCCHC7	6.12611			-1.26959		1.26959		2.41093
ZCCHC7	7.402		ZCCHC7	6.18071			-1.22129		1.22129		2.33155
ZCCHC8	8.94744		ZCCHC8	8.12695			-0.820486		0.820486		1.766
ZCCHC8	8.99586		ZCCHC8	8.00863			-0.987228		0.987228		1.98237
ZCCHC8	8.68634		ZCCHC8	7.99942			-0.686918		0.686918		1.60984
ZCCHC8	8.81178		ZCCHC8	8.03098			-0.780806		0.780806		1.71809
ZCCHC8	8.98991		ZCCHC8	8.18742			-0.80249		0.80249		1.74411
ZCCHC8	8.62371		ZCCHC8	8.26131			-0.3624		0.3624		1.28556
ZCCHC8	8.57321		ZCCHC8	8.10938			-0.463833		0.463833		1.3792
ZCCHC8	8.84124		ZCCHC8	7.99711			-0.844133		0.844133		1.79519
ZCCHC8	8.808		ZCCHC8	7.97739			-0.830614		0.830614		1.77844
ZCCHC9	7.67975		ZCCHC9	6.53876			-1.14098		1.14098		2.20531
ZCCHC9	7.55164		ZCCHC9	6.39051			-1.16112		1.16112		2.23631
ZCCHC9	7.62988		ZCCHC9	6.40555			-1.22433		1.22433		2.33647
ZCCHC9	7.44118		ZCCHC9	6.45949			-0.981695		0.981695		1.97478
ZCCHC9	7.51436		ZCCHC9	6.53569			-0.97867		0.97867		1.97065
ZCCHC9	7.40974		ZCCHC9	6.64676			-0.762989		0.762989		1.697
ZCCHC9	7.32924		ZCCHC9	6.57644			-0.752802		0.752802		1.68506
ZCCHC9	7.50984		ZCCHC9	6.46547			-1.04437		1.04437		2.06247
ZCCHC9	7.508		ZCCHC9	6.35762			-1.15038		1.15038		2.21972
ZCCHC10	6.89852		ZCCHC10	5.04109			-1.85744		1.85744		3.62363
ZCCHC10	6.87354		ZCCHC10	5.00068			-1.87285		1.87285		3.66256
ZCCHC10	6.70419		ZCCHC10	4.87741			-1.82678		1.82678		3.54744
ZCCHC10	6.85519		ZCCHC10	4.99287			-1.86232		1.86232		3.63591
ZCCHC10	6.89784		ZCCHC10	5.13999			-1.75785		1.75785		3.38195
ZCCHC10	6.63851		ZCCHC10	5.19807			-1.44044		1.44044		2.71404
ZCCHC10	6.61549		ZCCHC10	5.20641			-1.40908		1.40908		2.65568
ZCCHC10	6.7203		ZCCHC10	4.94816			-1.77214		1.77214		3.4156
ZCCHC10	6.775		ZCCHC10	5.01064			-1.76436		1.76436		3.39724
ZCCHC12	8.56875		ZCCHC12	9.56584			0.997086		-0.997086		0.501011
ZCCHC12	8.52602		ZCCHC12	9.70621			1.1802		-1.1802		0.441291
ZCCHC12	8.4286		ZCCHC12	9.4379			1.0093		-1.0093		0.496787
ZCCHC12	8.40592		ZCCHC12	9.58858			1.18266		-1.18266		0.440538
ZCCHC12	8.26283		ZCCHC12	9.63519			1.37235		-1.37235		0.38626
ZCCHC12	8.6411		ZCCHC12	9.60886			0.967766		-0.967766		0.511297
ZCCHC12	8.55257		ZCCHC12	9.57456			1.022		-1.022		0.492435
ZCCHC12	8.62905		ZCCHC12	9.45274			0.823692		-0.823692		0.564994
ZCCHC12	8.67327		ZCCHC12	9.60027			0.927		-0.927		0.525951
ZCCHC14	9.41992		ZCCHC14	10.1772			0.757282		-0.757282		0.59161
ZCCHC14	9.46036		ZCCHC14	10.0265			0.566132		-0.566132		0.675425
ZCCHC14	9.74081		ZCCHC14	10.0094			0.26856		-0.26856		0.830147
ZCCHC14	9.84792		ZCCHC14	10.2675			0.419544		-0.419544		0.747661
ZCCHC14	9.81713		ZCCHC14	10.1406			0.323496		-0.323496		0.799131
ZCCHC14	9.74217		ZCCHC14	10.1718			0.429672		-0.429672		0.74243
ZCCHC14	9.42015		ZCCHC14	9.8597			0.439556		-0.439556		0.737361
ZCCHC14	9.51737		ZCCHC14	10.1006			0.583227		-0.583227		0.667469
ZCCHC14	9.59908		ZCCHC14	10.1477			0.54866		-0.54866		0.683655
ZCCHC17	6.08025		ZCCHC17	5.85261			-0.227634		0.227634		1.17091
ZCCHC17	6.09891		ZCCHC17	5.75892			-0.339987		0.339987		1.26575
ZCCHC17	6.24304		ZCCHC17	5.67586			-0.567181		0.567181		1.48163
ZCCHC17	6.28462		ZCCHC17	5.91059			-0.374027		0.374027		1.29597
ZCCHC17	6.23883		ZCCHC17	5.81371			-0.425129		0.425129		1.34269
ZCCHC17	6.16253		ZCCHC17	5.83917			-0.323359		0.323359		1.25124
ZCCHC17	6.11323		ZCCHC17	5.78177			-0.331459		0.331459		1.25829
ZCCHC17	6.15154		ZCCHC17	5.86661			-0.284931		0.284931		1.21835
ZCCHC17	6.13991		ZCCHC17	5.77218			-0.367727		0.367727		1.29032
ZCCHC18	9.59862		ZCCHC18	10.4965			0.897909		-0.897909		0.536664
ZCCHC18	9.9994		ZCCHC18	10.5115			0.512079		-0.512079		0.701211
ZCCHC18	10.1222		ZCCHC18	10.2748			0.152563		-0.152563		0.899651
ZCCHC18	10.1274		ZCCHC18	10.4979			0.370487		-0.370487		0.773521
ZCCHC18	10.1231		ZCCHC18	10.4514			0.328289		-0.328289		0.796481
ZCCHC18	10.1958		ZCCHC18	10.4758			0.280027		-0.280027		0.823575
ZCCHC18	10.1301		ZCCHC18	10.3411			0.211		-0.211		0.863938
ZCCHC18	10.3033		ZCCHC18	10.3099			0.0065918		-0.0065918		0.995441
ZCCHC18	10.2015		ZCCHC18	10.4727			0.271164		-0.271164		0.828651
ZCCHC24	7.12827		ZCCHC24	7.80274			0.674461		-0.674461		0.626566
ZCCHC24	7.07383		ZCCHC24	7.84727			0.773449		-0.773449		0.585017
ZCCHC24	7.38667		ZCCHC24	7.77754			0.390867		-0.390867		0.762671
ZCCHC24	7.28648		ZCCHC24	7.79626			0.509777		-0.509777		0.702331
ZCCHC24	7.24567		ZCCHC24	7.80265			0.55698		-0.55698		0.679723
ZCCHC24	7.34853		ZCCHC24	7.67451			0.325977		-0.325977		0.797758
ZCCHC24	7.19775		ZCCHC24	7.78657			0.588821		-0.588821		0.664886
ZCCHC24	7.24571		ZCCHC24	7.94044			0.694729		-0.694729		0.617825
ZCCHC24	7.2894		ZCCHC24	7.776			0.486595		-0.486595		0.713708
