# Supplementary material for: Differential expression of zinc finger CCHC-type superfamily proteins in thyroid carcinoma and their associations with tumor immunity
Source: Thyroid Res. 2023 Oct 17;16:42. doi: 10.1186/s13044-023-00185-1 (PMC10580525; doi:10.1186/s13044-023-00185-1)
Supplement: Supplementary file 10 — Supplementary Material 10: Table S10. Raw data of RT-PCR [file 13044_2023_185_MOESM10_ESM.xlsx]

## Sheet: Differential genes
Table S1. Differential genes and Functional enrichment analysis
	logFC	AveExpr	t	P.Value	adj.P.Val	B
BCAP29	-4.32627	3.08032	-79.0915	0	0	1099.52
TOMM5	-3.48386	2.92807	-77.0034	0	0	1072.25
CHTF8	-4.91595	3.35257	-76.9385	0	0	1071.4
TAF10	-4.90372	4.13081	-76.4838	0	0	1065.39
TFPI	-3.40444	3.77626	-76.4542	0	0	1065
GPS2	-5.7801	3.87375	-75.9702	0	0	1058.58
GABARAP	-7.26337	4.8426	-75.8005	0	0	1056.32
SMARCE1	-3.16889	3.42431	-75.4261	0	0	1051.33
SDHA	-4.79243	4.05872	-75.4138	0	0	1051.16
EIF4A1	-6.54139	4.65224	-75.382	0	0	1050.74
PFDN5	-7.49614	5.66415	-75.3608	0	0	1050.45
SGSM3	-6.07851	3.94413	-75.3218	0	0	1049.93
ADSL	-2.80084	2.6979	-75.0375	0	0	1046.13
ANKHD1	-4.94468	3.43867	-74.8343	0	0	1043.4
ATP6V0C	-7.00457	4.42786	-74.7851	0	0	1042.74
ILK	-5.91621	3.94705	-74.7668	0	0	1042.5
MFSD14A	-4.49523	3.41405	-74.758	0	0	1042.38
CLN3	-4.11806	2.64782	-74.7244	0	0	1041.93
SUPT4H1	-5.50012	3.22673	-74.714	0	0	1041.79
RAB4B	-4.6243	3.24192	-74.6694	0	0	1041.19
BBS1	-4.71329	3.13134	-74.6114	0	0	1040.41
TOMM6	-7.65051	4.45029	-74.594	0	0	1040.17
NDUFA7	-4.98643	3.58453	-74.5825	0	0	1040.02
SARNP	-5.91348	3.55089	-74.5708	0	0	1039.86
EEF1G	-9.61619	5.59452	-74.5556	0	0	1039.66
NDUFA13	-5.51874	4.40462	-74.5355	0	0	1039.39
SRCAP	-4.19133	3.39585	-74.4726	0	0	1038.54
PSMA2	-4.53519	2.94154	-74.4141	0	0	1037.75
SLC35D2	-2.8838	4.0261	-74.4051	0	0	1037.63
NDUFV2	-4.88878	3.39799	-74.3859	0	0	1037.37
ZNF410	-3.316	2.19978	-74.3662	0	0	1037.11
ARPC1B	-5.43446	3.80234	-74.1765	0	0	1034.55
ABCA9	-3.81547	2.73163	-74.14	0	0	1034.05
PDCD6	-4.27962	3.77773	-74.1311	0	0	1033.93
RNF31	-4.86929	3.10736	-74.1106	0	0	1033.66
PSMA6	-5.06451	3.93783	-74.0754	0	0	1033.18
SLC39A1	-5.51666	3.65446	-74.0654	0	0	1033.05
UBE2V1	-4.53569	3.73181	-74.0093	0	0	1032.29
CHMP4A	-4.36936	3.74315	-73.972	0	0	1031.78
TXNDC5	-6.16009	3.80835	-73.971	0	0	1031.77
TAX1BP3	-6.23121	3.97103	-73.941	0	0	1031.36
HINT2	-4.44717	2.89166	-73.9285	0	0	1031.19
RPL36A	-6.84754	4.92109	-73.9081	0	0	1030.92
INO80B	-5.41762	3.80959	-73.8937	0	0	1030.72
TMEM35B	-5.80891	3.46704	-73.8935	0	0	1030.72
WDR83OS	-6.0892	3.5612	-73.8765	0	0	1030.49
PLSCR3	-4.93909	2.9383	-73.8214	0	0	1029.75
ZFPL1	-2.97953	3.97989	-73.7703	0	0	1029.05
JMJD7	-4.95927	3.08685	-73.7589	0	0	1028.9
MUTYH	-4.09885	2.71784	-73.7572	0	0	1028.88
NDST2	-4.41716	2.68307	-73.7528	0	0	1028.82
MRPS24	-5.56393	3.45657	-73.7092	0	0	1028.22
TEN1	-4.88016	2.89463	-73.7083	0	0	1028.21
SNX15	-4.01194	2.72963	-73.5848	0	0	1026.54
SPNS1	-5.29015	3.49008	-73.5798	0	0	1026.47
MDP1	-4.56691	2.75603	-73.5365	0	0	1025.88
ABHD16A	-4.63621	3.6012	-73.5222	0	0	1025.69
CHKB	-6.24979	4.12209	-73.5201	0	0	1025.66
HSPB6	-4.8471	4.11977	-73.5038	0	0	1025.44
RPL17	-7.61946	6.42561	-73.4406	0	0	1024.58
MAD1L1	-2.74217	1.8016	-73.4405	0	0	1024.58
HERC3	-3.52578	2.27403	-73.357	0	0	1023.44
ARL6IP4	-7.32092	4.73221	-73.3437	0	0	1023.26
RTEL1	-4.51809	2.89898	-73.3284	0	0	1023.06
C8orf88	-2.97011	2.91935	-73.262	0	0	1022.15
SPSB3	-5.91935	3.60768	-73.2611	0	0	1022.14
BCKDHA	-5.24836	3.41842	-73.2371	0	0	1021.81
ST6GALNAC6	-5.47176	3.33667	-73.2308	0	0	1021.73
CRLS1	-3.57158	2.73797	-73.2036	0	0	1021.36
AARSD1	-4.471	3.35218	-73.1499	0	0	1020.63
ADH1B	-5.63515	3.93553	-73.1239	0	0	1020.27
GIMAP5	-4.86145	3.34182	-73.0899	0	0	1019.81
ARHGAP8	-4.06693	3.12995	-73.0343	0	0	1019.05
SLC25A32	-3.87033	2.39978	-73.0225	0	0	1018.89
ABCB6	-5.41688	3.4418	-73.0116	0	0	1018.74
ACAD11	-4.94498	3.15314	-72.9726	0	0	1018.21
RPS17	-6.68591	5.65332	-72.9358	0	0	1017.71
TTC4	-4.19004	3.12258	-72.9028	0	0	1017.26
RAD50	-3.07129	2.60316	-72.8037	0	0	1015.9
TJP2	-5.2323	3.66166	-72.7831	0	0	1015.62
NICN1	-5.38019	3.13008	-72.7465	0	0	1015.12
CSPP1	-1.8838	2.27463	-72.7324	0	0	1014.93
MRM2	-3.73951	2.29784	-72.712	0	0	1014.65
DDT	-4.85823	2.83229	-72.7073	0	0	1014.59
GNG10	-4.68345	2.96593	-72.6744	0	0	1014.14
EGLN2	-4.46648	4.04637	-72.6505	0	0	1013.81
TREX1	-4.33411	2.52115	-72.6274	0	0	1013.49
FDX2	-4.85677	2.91628	-72.612	0	0	1013.28
IPO4	-4.38921	2.67568	-72.593	0	0	1013.02
NME2	-6.97891	4.75304	-72.5542	0	0	1012.49
BSCL2	-4.27315	3.78127	-72.5417	0	0	1012.32
C11orf52	-4.14335	2.48981	-72.5371	0	0	1012.26
SPOUT1	-4.33646	2.61179	-72.537	0	0	1012.26
PSMD9	-3.42121	3.05224	-72.5279	0	0	1012.13
RPS10	-7.61394	5.4393	-72.5267	0	0	1012.11
PTCD1	-2.124	2.31411	-72.5018	0	0	1011.77
EVA1B	-5.63946	3.28047	-72.4925	0	0	1011.65
VARS2	-4.85913	2.98708	-72.4385	0	0	1010.91
TM9SF1	-3.4553	4.20362	-72.3533	0	0	1009.74
CHD1L	-4.25899	2.66851	-72.2428	0	0	1008.22
ERVK3-1	-3.31198	3.77406	-72.2144	0	0	1007.83
TSFM	-3.32581	2.37572	-72.2036	0	0	1007.68
NOP2	-4.47757	2.94192	-72.1545	0	0	1007.01
PSEN2	-3.46922	2.20297	-72.1469	0	0	1006.91
ALDOA	-6.24712	5.60279	-72.1194	0	0	1006.53
ARHGEF10	-4.04152	2.60511	-72.1127	0	0	1006.43
HDHD2	-4.06221	2.96881	-72.1056	0	0	1006.34
PIK3R2	-4.27085	2.60115	-72.0717	0	0	1005.87
UTP14C	-3.90454	2.27127	-72.0389	0	0	1005.42
U2AF1L4	-4.16762	4.22236	-71.8965	0	0	1003.46
CNPY2	-4.01104	4.40941	-71.8365	0	0	1002.64
OGFOD2	-3.77165	2.55834	-71.734	0	0	1001.22
MTHFS	-3.31622	2.85489	-71.6892	0	0	1000.61
DIABLO	-2.94911	2.25123	-71.6101	0	0	999.513
PTP4A1	-4.77421	2.90613	-71.5925	0	0	999.27
ACY1	-4.48956	2.89083	-71.4852	0	0	997.788
NUDT3	-4.18558	2.86526	-71.4258	0	0	996.967
COQ8A	-3.70948	2.35697	-71.4073	0	0	996.712
ZNF23	-3.7017	2.47239	-71.407	0	0	996.708
MTCP1	-2.45658	2.15714	-71.4012	0	0	996.627
TNFRSF6B	-5.36617	3.1215	-71.341	0	0	995.795
CYB5D1	-3.469	2.08386	-71.3325	0	0	995.677
IL10RB	-3.38764	2.42469	-71.3139	0	0	995.419
LIN37	-2.85225	2.49396	-71.2417	0	0	994.421
GTF2H4	-4.83981	3.11909	-71.1948	0	0	993.771
CDC42EP2	-4.67351	2.73876	-71.1837	0	0	993.617
PILRB	-6.35139	4.75023	-71.1175	0	0	992.699
RNASE4	-4.76714	3.16842	-71.1153	0	0	992.67
PID1	-3.34238	3.17613	-71.0687	0	0	992.023
MROH7	-4.50972	3.14581	-71.0408	0	0	991.636
KRTCAP2	-4.0907	3.683	-71.0213	0	0	991.366
ST3GAL3	-3.03465	1.98818	-70.9986	0	0	991.052
AGAP6	-4.45102	2.94466	-70.9971	0	0	991.031
MRPL2	-3.3317	3.69178	-70.933	0	0	990.141
PLA2G4B	-5.87902	3.67928	-70.8832	0	0	989.449
DCUN1D5	-2.09439	3.33376	-70.8411	0	0	988.864
C11orf98	-4.05561	2.44537	-70.7763	0	0	987.964
EMC6	-3.76987	3.65874	-70.722	0	0	987.209
RPP21	-3.8565	3.26276	-70.7178	0	0	987.15
SRSF1	-2.88156	6.32948	-70.6808	0	0	986.636
C16orf46	-3.45938	2.16035	-70.6231	0	0	985.832
C17orf49	-4.09544	2.88376	-70.6034	0	0	985.559
PTGR2	-2.74149	2.57374	-70.544	0	0	984.731
UCHL3	-2.71314	3.4199	-70.532	0	0	984.565
SRP19	-2.26836	3.65743	-70.5264	0	0	984.486
MTG1	-4.15403	3.79012	-70.5095	0	0	984.251
ALKBH6	-3.27775	2.82996	-70.4854	0	0	983.914
DHPS	-4.56266	4.05626	-70.4594	0	0	983.552
RBFA	-2.46079	3.54143	-70.4433	0	0	983.327
DBNDD2	-4.19977	3.01079	-70.4401	0	0	983.283
ZNF57	-2.1829	1.61284	-70.4326	0	0	983.179
RABAC1	-4.13312	6.09375	-70.4091	0	0	982.852
ZNF564	-2.95962	1.95545	-70.3945	0	0	982.647
C18orf32	-2.55974	3.31252	-70.3678	0	0	982.275
STRADA	-3.31683	2.88265	-70.3412	0	0	981.904
RNASEK	-5.86389	4.90143	-70.2854	0	0	981.126
CKLF	-3.58862	2.34893	-70.2829	0	0	981.091
EGFL8	-4.66906	3.42562	-70.2581	0	0	980.743
PTRH1	-3.17998	1.92321	-70.2502	0	0	980.634
SDR39U1	-3.47129	4.40144	-70.2264	0	0	980.302
SNRPN	-3.83885	5.25287	-70.1533	0	0	979.279
C7orf25	-2.66848	1.96068	-70.0995	0	0	978.528
GEMIN7	-2.79563	2.08019	-70.0869	0	0	978.352
FKBP2	-6.03364	4.2747	-69.987	0	0	976.954
RNASEH2A	-3.70131	2.23538	-69.9554	0	0	976.512
CDK3	-4.62313	3.11759	-69.88	0	0	975.456
ZGPAT	-3.25787	3.9622	-69.8745	0	0	975.379
SLC7A6	-3.10206	3.45504	-69.7846	0	0	974.119
IFI30	-5.4421	3.49297	-69.7318	0	0	973.379
CDK5RAP3	-5.75447	5.15489	-69.7056	0	0	973.011
MINDY4	-3.42787	2.57435	-69.6855	0	0	972.729
LY6G5B	-4.28433	3.40207	-69.673	0	0	972.554
LAT	-4.70078	2.95388	-69.6658	0	0	972.453
MRPL38	-4.42989	3.72592	-69.6153	0	0	971.743
MRPL53	-3.14954	1.83636	-69.5528	0	0	970.865
SARS2	-3.48695	3.51223	-69.4609	0	0	969.574
NUPR1	-4.5313	5.0742	-69.4201	0	0	969
PCBP1	-4.67697	5.51051	-69.3784	0	0	968.414
LDHB	-4.60812	6.0212	-69.2911	0	0	967.184
FGF11	-2.94739	1.90046	-69.2135	0	0	966.092
DPT	-5.34937	4.75866	-69.1492	0	0	965.186
SCLY	-2.64662	2.03718	-69.1234	0	0	964.822
NDUFS7	-3.16152	3.73896	-68.9051	0	0	961.741
CALML4	-2.57789	1.54033	-68.7077	0	0	958.95
GALNT4	-2.06204	1.27739	-68.6767	0	0	958.511
PTPMT1	-2.54447	3.02736	-68.6535	0	0	958.183
AMT	-4.97895	3.10979	-68.6237	0	0	957.761
WDR73	-2.74573	2.88444	-68.6081	0	0	957.54
TRAPPC5	-3.02802	2.2774	-68.5102	0	0	956.153
AGAP5	-2.6499	1.61728	-68.4999	0	0	956.007
MARK3	-2.21039	4.79795	-68.4469	0	0	955.256
KYAT1	-3.03228	1.94351	-68.444	0	0	955.214
AS3MT	-3.7353	2.18518	-68.4307	0	0	955.026
PDF	-3.64223	2.71167	-68.4145	0	0	954.795
FXYD1	-4.83569	2.84945	-68.3515	0	0	953.902
NPEPL1	-4.60423	4.50708	-68.3101	0	0	953.314
CPT1B	-5.19541	3.48963	-68.2599	0	0	952.601
LRP11	-3.92694	3.48226	-68.1224	0	0	950.646
PPAN	-2.83551	3.66352	-68.1132	0	0	950.516
EIF4EBP3	-4.09699	4.32897	-68.099	0	0	950.314
BHLHB9	-2.36908	1.417	-68.0764	0	0	949.993
NDUFB8	-4.14663	5.18946	-68.0656	0	0	949.838
ITIH4	-4.03903	2.46695	-68.0521	0	0	949.647
L3MBTL1	-2.93413	2.44985	-67.9769	0	0	948.576
ADAM33	-3.88299	3.29253	-67.9716	0	0	948.5
ASNS	-4.46214	3.03159	-67.9701	0	0	948.48
PCSK7	-2.68842	3.19575	-67.8973	0	0	947.442
C1orf50	-2.48687	2.8043	-67.828	0	0	946.455
NMNAT3	-2.01731	2.18077	-67.7198	0	0	944.912
TRAPPC6B	-2.8299	3.65925	-67.6857	0	0	944.425
TRIM34	-3.03751	1.87884	-67.6123	0	0	943.376
CELF6	-4.87445	2.84277	-67.583	0	0	942.958
KRIT1	-2.30997	3.68154	-67.5429	0	0	942.385
AGPAT4	-2.03585	2.21153	-67.4202	0	0	940.63
FMC1	-3.03104	3.51649	-67.3757	0	0	939.993
ZNF20	-1.97212	1.5573	-67.363	0	0	939.811
LUC7L2	-2.47992	5.90615	-67.3396	0	0	939.476
LIPH	4.80627	2.45752	67.2584	0	0	938.314
CDRT4	-4.09335	3.22311	-67.2518	0	0	938.22
CTNND1	-3.75036	5.37279	-67.2367	0	0	938.002
CDK11A	-3.86452	2.99833	-67.2148	0	0	937.689
SCFD1	-2.08171	4.20117	-67.1429	0	0	936.658
NHEJ1	-2.37761	2.05389	-67.063	0	0	935.511
PXMP2	-2.65309	3.04098	-67.0485	0	0	935.304
RBM4	-2.78449	4.39711	-67.0011	0	0	934.624
PET100	-3.1547	3.45134	-66.9431	0	0	933.79
CCL14	-4.42472	2.86543	-66.9379	0	0	933.715
SRXN1	-5.16893	3.06519	-66.93	0	0	933.602
COQ6	-2.25203	3.18485	-66.8337	0	0	932.217
GOLT1A	3.76113	2.73979	66.832	0	0	932.194
GCSH	-2.4871	2.99456	-66.8284	0	0	932.141
GIT2	-2.51901	3.61846	-66.8009	0	0	931.746
RNASET2	-2.80446	4.18445	-66.7597	0	0	931.153
ZNF337	-2.84767	2.80729	-66.7084	0	0	930.415
FANCG	-3.20868	2.26045	-66.6944	0	0	930.213
MEF2B	-3.62585	2.26423	-66.6695	0	0	929.855
RANGRF	-3.16103	3.11044	-66.653	0	0	929.617
TRIM52	-2.5452	4.18308	-66.5162	0	0	927.645
CSNK2B	-4.14233	5.93221	-66.4714	0	0	926.999
WBP1	-4.03375	5.63413	-66.3618	0	0	925.419
NPIPB5	-3.76939	2.73442	-66.2411	0	0	923.674
TRIM41	-2.05911	4.76627	-66.2204	0	0	923.375
CCDC180	-2.8462	1.99763	-66.2062	0	0	923.17
NPFF	-3.50846	2.04087	-66.2029	0	0	923.122
SPICE1	-2.56074	2.30204	-66.126	0	0	922.01
TSSK3	-3.08877	2.36773	-66.0832	0	0	921.391
CENPT	-2.73109	4.67694	-66.0779	0	0	921.315
ZFYVE21	-2.42825	5.33629	-66.0726	0	0	921.238
PDLIM3	-3.3653	3.93217	-66.0377	0	0	920.732
SAP25	-5.26545	3.08466	-65.9421	0	0	919.348
PABPN1	-4.4758	5.89523	-65.8872	0	0	918.552
COX20	-2.46826	2.17242	-65.7069	0	0	915.937
DET1	-2.17366	2.01984	-65.6668	0	0	915.354
MUSTN1	-5.07918	3.07534	-65.6666	0	0	915.351
VPS33B	-2.4071	3.11169	-65.6501	0	0	915.112
FLT3LG	-3.18771	2.06364	-65.5923	0	0	914.272
ABCA6	-3.33802	2.52563	-65.57	0	0	913.947
DDX19A	-2.01894	4.06658	-65.5254	0	0	913.299
MED17	-2.24594	2.47929	-65.5063	0	0	913.022
MTFP1	-3.18261	2.39743	-65.4205	0	0	911.774
NBPF19	-1.72087	1.00785	-65.3861	0	0	911.273
MRPL46	-2.87532	2.81571	-65.3769	0	0	911.138
TXNDC12	-2.74671	3.94079	-65.3731	0	0	911.084
HSPB2	-3.14358	1.87678	-65.3196	0	0	910.304
LZTR1	-2.92683	4.3285	-65.3084	0	0	910.14
SPRN	-2.89789	2.00963	-65.2321	0	0	909.029
CD68	-4.78516	2.83111	-65.2121	0	0	908.738
RALGDS	-3.53136	4.05792	-65.184	0	0	908.328
C2orf74	-3.23225	3.11768	-65.11	0	0	907.248
PODN	-4.38527	4.46081	-64.9091	0	0	904.314
CD302	-2.99479	3.91036	-64.8644	0	0	903.66
CCDC189	-3.17556	2.59281	-64.8635	0	0	903.648
CFD	-4.25393	6.99957	-64.8606	0	0	903.605
EGLN1	-2.70806	3.01446	-64.8297	0	0	903.153
ECSCR	-4.01739	4.47938	-64.8141	0	0	902.925
IFNAR2	-3.01348	2.43945	-64.8133	0	0	902.914
PRKRA	-2.40866	4.0911	-64.7835	0	0	902.476
APOD	-5.75714	7.42117	-64.6929	0	0	901.151
JTB	-3.47167	6.15883	-64.6423	0	0	900.409
NPC2	2.75376	8.9811	64.622	0	0	900.111
C4orf36	-1.70561	1.10797	-64.5482	0	0	899.03
GPC3	-3.87903	3.59832	-64.5344	0	0	898.828
CAPZB	-1.75707	6.32858	-64.5255	0	0	898.697
SH3BGR	-2.912	2.56207	-64.5252	0	0	898.692
POLD4	-2.82468	4.57059	-64.4977	0	0	898.29
IRF9	-4.34806	4.11001	-64.3794	0	0	896.554
KLC1	-2.49563	3.46888	-64.3757	0	0	896.5
FEZ1	-2.47674	2.51323	-64.3274	0	0	895.79
SELENOH	-2.85739	5.22052	-64.323	0	0	895.725
DNLZ	-2.38183	1.63531	-64.2616	0	0	894.822
PPT2	-2.52638	4.09146	-64.176	0	0	893.564
METTL7B	4.6127	4.1804	64.0233	0	0	891.317
CSRP2	-2.73664	4.98917	-63.9018	0	0	889.527
TBX1	-3.31451	2.92706	-63.8998	0	0	889.497
C19orf33	-4.39146	2.55451	-63.8619	0	0	888.939
LRCH4	-3.72841	5.11618	-63.7515	0	0	887.309
MAP6D1	-1.51865	0.994701	-63.75	0	0	887.287
GGT1	-3.15073	2.32054	-63.7089	0	0	886.681
APTX	-1.63159	3.36371	-63.6363	0	0	885.608
CRELD1	-4.41914	4.49346	-63.5622	0	0	884.513
CCDC107	-2.84976	3.97235	-63.386	0	0	881.905
TMEM120B	-2.31719	3.62174	-63.3549	0	0	881.446
ADHFE1	-2.99313	3.4342	-63.3135	0	0	880.832
TMA7	-2.89859	6.89034	-63.2877	0	0	880.45
SENP3	-2.16219	4.57646	-63.1988	0	0	879.132
NOL12	-3.05304	3.35157	-63.193	0	0	879.046
TICAM2	-2.53419	1.53357	-63.0345	0	0	876.693
TMEFF1	-2.54083	1.57711	-63.0298	0	0	876.623
OSR1	-3.45651	2.59259	-63.0219	0	0	876.507
EME2	-2.99577	3.70373	-62.9514	0	0	875.46
RAB24	-3.66211	4.42022	-62.8459	0	0	873.891
PAGR1	-2.66534	4.6562	-62.7248	0	0	872.089
PRSS53	-2.61473	1.79118	-62.717	0	0	871.971
CAMK1	-3.37869	3.76119	-62.6921	0	0	871.601
ARL2BP	-2.63428	1.93614	-62.6903	0	0	871.574
PSMC1	-2.59411	4.3706	-62.69	0	0	871.569
TEPSIN	-2.92684	4.0085	-62.6447	0	0	870.896
HIF3A	-3.58254	2.80151	-62.6367	0	0	870.776
SULT1A2	-2.71883	2.37607	-62.6209	0	0	870.54
IDS	-3.52883	3.98751	-62.612	0	0	870.407
CCDC13	-1.62023	1.16647	-62.5958	0	0	870.166
HDAC10	-2.66232	1.9781	-62.5645	0	0	869.699
CHRD	-3.13449	3.04048	-62.5167	0	0	868.988
ZNF276	-2.23201	3.7967	-62.4723	0	0	868.324
C8orf76	-2.4512	3.22463	-62.4355	0	0	867.776
TBRG1	-1.96977	4.84454	-62.4192	0	0	867.532
PSMA1	-2.59145	5.10052	-62.26	0	0	865.155
RHOF	-2.24066	1.99062	-62.1936	0	0	864.162
SERINC2	2.11659	6.06728	62.1818	0	0	863.985
BOLA2	-2.15364	1.25277	-62.1809	0	0	863.971
PRC1	-1.796	1.1053	-62.1278	0	0	863.176
HAUS7	-1.85849	1.35491	-62.0943	0	0	862.675
GDAP1	-1.84576	2.63094	-62.0553	0	0	862.091
EXOSC3	-1.33099	3.14265	-62.0516	0	0	862.036
PPP1R12C	-2.16767	5.99543	-61.9507	0	0	860.524
NDUFA11	-3.02943	4.21261	-61.7643	0	0	857.73
RGL4	-1.66521	1.30548	-61.7533	0	0	857.564
CLMN	-2.21874	2.8786	-61.737	0	0	857.319
HNRNPA2B1	-1.78961	8.34935	-61.7238	0	0	857.121
HYPK	-2.344	1.58798	-61.6762	0	0	856.406
SLC17A7	-2.06814	1.63766	-61.6641	0	0	856.225
FXYD6	-2.91634	4.24786	-61.6616	0	0	856.187
FBXO17	-2.14378	1.97766	-61.6146	0	0	855.48
FIG4	-1.77349	3.11815	-61.5599	0	0	854.659
AKAP8L	-2.4867	5.82597	-61.5407	0	0	854.37
AP1G2	-3.47146	5.20225	-61.4935	0	0	853.66
TERF1	-1.66511	3.46175	-61.418	0	0	852.523
VKORC1	-3.13831	5.40561	-61.3417	0	0	851.375
LGI4	-3.07038	3.3771	-61.3371	0	0	851.306
MMRN1	-3.75569	3.88258	-61.3319	0	0	851.227
MSH5	-2.53371	1.99569	-61.3199	0	0	851.047
RPL26	-3.62703	7.35362	-61.22	0	0	849.541
TOP3B	-1.90914	1.15155	-61.1968	0	0	849.19
MGAT2	-2.53609	1.67652	-61.1933	0	0	849.139
XRCC3	-2.79225	3.8348	-61.1569	0	0	848.589
DEPDC5	-1.46237	2.54275	-61.1372	0	0	848.291
PBX4	-3.00252	4.49454	-61.1021	0	0	847.762
MIA2	3.71589	1.93821	61.0942	0	0	847.643
ZNF223	-1.70612	2.0019	-61.0923	0	0	847.614
DDX39B	-3.27168	6.46396	-61.0067	0	0	846.322
ZNF709	-1.52301	1.23445	-60.9635	0	0	845.669
MRPS5	-1.71023	5.34256	-60.8585	0	0	844.082
MRPS18C	-1.60909	2.80179	-60.8426	0	0	843.842
FIP1L1	-1.77065	4.32685	-60.8267	0	0	843.6
CCDC82	-2.03693	3.74111	-60.8192	0	0	843.487
MOK	-1.94444	3.2363	-60.7744	0	0	842.809
SPG7	-2.37566	4.82923	-60.6347	0	0	840.694
SCO2	-3.34375	2.27269	-60.6245	0	0	840.54
NFIA	-1.99343	3.8661	-60.6244	0	0	840.539
ARHGEF25	-3.24749	2.86701	-60.5875	0	0	839.979
CRAMP1	-2.10691	3.97442	-60.4963	0	0	838.597
CASZ1	-1.77795	2.1238	-60.4532	0	0	837.942
HDAC8	-1.67973	2.4584	-60.4183	0	0	837.413
GPX1	1.66807	8.60428	60.4087	0	0	837.268
CLTCL1	-1.81692	2.9269	-60.3963	0	0	837.078
STARD5	-2.37799	1.91306	-60.2801	0	0	835.314
CLCC1	-1.80961	4.00492	-60.2605	0	0	835.015
ARL2	-2.03981	6.45126	-60.0856	0	0	832.356
ACBD7	2.95577	1.91989	60.0838	0	0	832.328
ADORA2A	-2.32981	1.42071	-60.0029	0	0	831.096
SEC16B	-2.87324	1.79152	-60	0	0	831.053
KSR1	-2.35221	4.09992	-59.98	0	0	830.747
ACACB	-2.40494	4.21479	-59.9795	0	0	830.741
TBK1	-1.81229	3.70833	-59.9748	0	0	830.669
DMPK	-2.79621	4.81121	-59.9663	0	0	830.539
HNRNPL	-1.70822	6.9896	-59.949	0	0	830.276
SETD6	-1.87767	3.91685	-59.9131	0	0	829.728
POLR2F	3.13714	2.23577	59.8965	0	0	829.476
CCNK	-2.05432	2.81052	-59.8447	0	0	828.685
METTL17	-2.16833	5.0288	-59.8387	0	0	828.594
RPS6KB2	-1.97575	5.02344	-59.8143	0	0	828.221
LIME1	-3.51285	3.4957	-59.8122	0	0	828.189
CBWD2	-1.76202	3.67031	-59.798	0	0	827.973
DPH1	-2.23359	4.46205	-59.7278	0	0	826.902
TRIM3	-1.6336	3.24494	-59.7252	0	0	826.863
RWDD3	-2.31753	3.49715	-59.6933	0	0	826.375
BORCS8	-1.52578	3.77269	-59.663	0	0	825.913
SAPCD1	-2.62852	1.83803	-59.5609	0	0	824.352
TPCN2	-1.53689	2.59082	-59.554	0	0	824.248
HSD17B3	-3.48078	2.03707	-59.553	0	0	824.232
CLEC4A	-2.02315	1.40529	-59.4735	0	0	823.016
DNHD1	-1.95087	2.20002	-59.4635	0	0	822.863
TGFA	2.93253	4.06684	59.4445	0	0	822.573
PITRM1	-1.68539	4.82248	-59.4405	0	0	822.511
LTB4R2	-2.03412	1.74069	-59.3859	0	0	821.676
KCNIP4	-1.75302	1.32851	-59.3228	0	0	820.71
LAMA2	-3.40926	3.34573	-59.3113	0	0	820.534
CSNK2A1	-1.64693	4.36907	-59.2993	0	0	820.349
KCNMB3	-1.10638	1.07973	-59.2715	0	0	819.923
MYZAP	-2.22673	2.05515	-59.2067	0	0	818.93
CTRL	-2.13435	1.24216	-59.183	0	0	818.568
GET4	-1.78231	1.45581	-59.1803	0	0	818.526
NPHP3	-2.85611	3.83708	-59.1425	0	0	817.946
PPIH	-1.4934	4.15377	-59.1229	0	0	817.646
ZNF625	-1.66529	1.23449	-59.0979	0	0	817.262
GNG5	-3.3393	5.60898	-59.0876	0	0	817.104
EWSR1	-1.68515	7.01529	-59.0509	0	0	816.541
ATP7B	-1.38995	1.48222	-59.0467	0	0	816.477
PKD1	-2.25388	3.76298	-59.0134	0	0	815.965
CDT1	2.2179	2.24378	58.9623	0	0	815.18
ANKRD23	-2.34176	2.00219	-58.9264	0	0	814.629
SNED1	-2.72012	4.57303	-58.9139	0	0	814.436
KLHDC8A	4.00258	2.68853	58.8494	0	0	813.446
GPSM2	-1.72923	1.56675	-58.8339	0	0	813.207
NDUFB9	-2.26895	5.60705	-58.7759	0	0	812.315
PLEKHH1	-3.25969	6.46613	-58.7599	0	0	812.069
SLC7A6OS	-1.4663	2.58635	-58.7314	0	0	811.631
ZC3H11A	-1.71296	1.02537	-58.7019	0	0	811.177
CRIP1	-4.19475	4.226	-58.62	0	0	809.915
DCAF8	-2.05204	5.88491	-58.5981	0	0	809.577
MC1R	-2.90403	3.31672	-58.5962	0	0	809.549
RUNX1T1	-1.70104	1.99028	-58.5829	0	0	809.343
NRN1L	-2.36789	1.40797	-58.5825	0	0	809.337
CYP17A1	-2.15524	1.85223	-58.4628	0	0	807.493
SPDYE3	-0.769325	0.507135	-58.4465	0	0	807.241
WDR27	-2.50939	3.19957	-58.4237	0	0	806.889
CENPS	-2.44048	3.30837	-58.4004	0	0	806.529
COG8	-1.79286	3.32585	-58.3971	0	0	806.478
NDUFA10	-1.33153	4.64094	-58.3466	0	0	805.7
MRPS28	-1.77272	3.7482	-58.32	0	0	805.289
MATR3	-2.09479	2.2465	-58.3128	0	0	805.177
SZT2	-1.82244	3.79233	-58.3024	0	0	805.017
A1BG	-2.06515	1.42128	-58.285	0	0	804.748
MRNIP	-2.37078	4.46279	-58.2789	0	0	804.654
MICAL3	-2.07651	2.95485	-58.2533	0	0	804.258
VIT	-3.1205	2.19888	-58.2363	0	0	803.996
FRMD4A	-1.64335	2.53995	-58.2246	0	0	803.815
PRPF40B	-2.26205	3.78284	-58.2044	0	0	803.503
ZNF177	-1.96717	1.19569	-58.1321	0	0	802.385
NPIPA1	-3.12015	3.02243	-58.1177	0	0	802.162
DDTL	-1.5673	2.32089	-58.0889	0	0	801.717
PSMD6	-1.48928	5.27252	-58.0738	0	0	801.483
MZF1	-2.51668	5.30283	-58.0228	0	0	800.694
WDR83	-1.95771	3.52684	-57.9564	0	0	799.665
ANAPC5	-1.55169	5.82069	-57.9482	0	0	799.539
RAF1	-2.6663	5.67671	-57.9332	0	0	799.307
SEC31B	-2.73853	3.28433	-57.8772	0	0	798.439
SGCE	-2.68016	3.93905	-57.8559	0	0	798.108
CORO7	-2.33779	3.22181	-57.8073	0	0	797.356
RBM5	-2.34949	5.97289	-57.7741	0	0	796.84
GALT	-2.17974	4.89807	-57.7728	0	0	796.82
ZMAT5	-1.81328	4.60958	-57.7716	0	0	796.801
ASF1B	2.42789	2.17648	57.7402	0	0	796.315
IMMP1L	-1.14616	2.32867	-57.7231	0	0	796.049
COX6A1	-2.4746	7.20278	-57.7174	0	0	795.961
PRICKLE4	-1.95254	1.3811	-57.7169	0	0	795.953
PLAGL1	-2.14703	2.76345	-57.6582	0	0	795.042
SH3BGRL3	1.88604	7.62585	57.6074	0	0	794.253
ATR	-1.43377	2.97683	-57.588	0	0	793.952
PEG3	-2.05857	2.10805	-57.5777	0	0	793.793
ZNF394	-1.30935	4.00499	-57.5598	0	0	793.513
DIMT1	-1.93583	3.56168	-57.5082	0	0	792.712
SVEP1	-2.81421	2.62548	-57.5027	0	0	792.627
HDAC6	-1.74655	5.24233	-57.4842	0	0	792.339
GNAI1	-2.39132	3.28489	-57.4284	0	0	791.471
ASL	-2.02494	4.5294	-57.4248	0	0	791.415
PMP22	-3.11484	5.93156	-57.327	0	0	789.895
BGLAP	-2.94987	2.62669	-57.3179	0	0	789.753
TIGD7	-1.51723	2.11771	-57.3118	0	0	789.657
PKDCC	-2.88887	3.37	-57.2771	0	0	789.117
HEXA	-2.03058	4.41389	-57.2453	0	0	788.621
WNT11	-3.28107	3.18421	-57.236	0	0	788.477
CDH3	3.96037	3.24218	57.206	0	0	788.009
PARP6	-2.25995	5.60007	-57.1983	0	0	787.889
MRGPRF	-2.87635	2.79155	-57.1684	0	0	787.423
NKTR	-2.71459	5.4916	-57.1408	0	0	786.994
TRA2B	-1.51853	5.80358	-57.1031	0	0	786.405
ABCA10	-2.92731	2.25605	-57.0915	0	0	786.226
ZNF446	-1.7335	3.38018	-57.0659	0	0	785.825
MTERF4	-1.72979	4.39487	-57.0107	0	0	784.965
ANAPC4	-1.65888	4.54654	-57.0063	0	0	784.896
TAF1C	-2.13642	5.47501	-57.0015	0	0	784.822
RAB43	-2.145	2.3433	-56.9756	0	0	784.417
ECI2	-1.63773	4.97021	-56.9293	0	0	783.694
CHN2	-1.91202	1.3942	-56.9269	0	0	783.657
DNAJC7	-1.53212	4.94051	-56.899	0	0	783.221
FMO2	-3.26473	2.98035	-56.8859	0	0	783.017
YJEFN3	-3.3873	3.53393	-56.738	0	0	780.705
TIMM23B	-1.56569	2.64776	-56.7329	0	0	780.625
TTLL3	-3.28408	4.26892	-56.6777	0	0	779.761
ECE2	-1.7086	0.996258	-56.6549	0	0	779.405
HOXA4	-2.16673	1.40431	-56.651	0	0	779.343
PAN2	-2.82843	5.5979	-56.6367	0	0	779.12
NPHP1	-1.67011	2.63054	-56.6228	0	0	778.902
SRPX	-3.4196	5.25944	-56.5666	0	0	778.023
NDUFA9	-1.57363	2.92218	-56.5505	0	0	777.771
TSC1	-1.9323	4.26037	-56.5306	0	0	777.459
MAN2C1	-2.60502	6.08544	-56.5006	0	0	776.989
PTGDS	-4.48998	3.21228	-56.472	0	0	776.541
ATAD3B	-2.33853	4.21071	-56.4517	0	0	776.223
NDUFAF2	-1.59439	3.83176	-56.436	0	0	775.977
NDRG1	-2.03859	6.38599	-56.3784	0	0	775.073
DYRK1A	-1.485	4.29022	-56.3562	0	0	774.726
MED31	-1.61664	3.63541	-56.2963	0	0	773.785
ADCY4	-2.8108	4.23994	-56.2846	0	0	773.601
GOLGA8N	-2.15999	2.4015	-56.1301	0	0	771.176
TSC2	-1.94584	5.46213	-56.13	0	0	771.174
SLX1A	-1.83044	1.07381	-56.1277	0	0	771.139
GALE	2.63184	4.16527	56.0995	0	0	770.695
DRG2	-1.48802	4.559	-56.0888	0	0	770.527
LYVE1	-3.52928	3.87083	-56.067	0	0	770.183
IGFLR1	-2.74399	2.45696	-56.0592	0	0	770.061
CLN6	-1.7624	3.93881	-56.056	0	0	770.011
MKRN2	-1.49062	4.46186	-56.0497	0	0	769.913
ERCC8	-1.45834	2.49177	-56.0473	0	0	769.874
ZBED6	-2.00141	1.2272	-56.0044	0	0	769.199
IKBKB	-1.59291	4.88816	-55.9981	0	0	769.1
IGF2	-3.64698	2.34364	-55.8935	0	0	767.454
QPCT	3.81294	3.91903	55.8869	0	0	767.351
FBXL8	-2.38667	3.51568	-55.865	0	0	767.005
AP5Z1	-1.62587	4.72115	-55.858	0	0	766.896
PAM16	-2.07835	3.14417	-55.844	0	0	766.675
EPM2A	-1.09572	1.72901	-55.8154	0	0	766.225
DOT1L	-1.99156	3.87211	-55.7997	0	0	765.977
JMJD4	-1.51082	3.37669	-55.7787	0	0	765.646
AOX1	-3.58762	3.45745	-55.7483	0	0	765.167
PLA2G6	-3.09173	5.08365	-55.7435	0	0	765.091
GLYCTK	-1.78085	2.76489	-55.7312	0	0	764.898
PET117	-2.0595	2.27555	-55.705	0	0	764.484
PEAR1	-2.55212	4.04183	-55.679	0	0	764.074
PMM1	-1.70887	4.24879	-55.6428	0	0	763.504
PRKAG2	-1.35003	3.2979	-55.6145	0	0	763.057
AMACR	-2.00162	1.90188	-55.589	0	0	762.655
E2F1	1.96644	2.42309	55.5389	0	0	761.864
LBHD1	-1.78345	2.13779	-55.4928	0	0	761.137
SGSM2	-1.97919	5.56053	-55.4447	0	0	760.376
CLDN16	4.93427	2.73511	55.374	0	0	759.26
ATP2C2	-2.52498	2.6857	-55.372	0	0	759.228
PGM5	-2.48256	3.33518	-55.3661	0	0	759.134
NTAN1	-2.16337	4.4556	-55.3272	0	0	758.519
SCARA5	-4.1037	3.32683	-55.3003	0	0	758.095
DCTN2	-1.5811	6.13314	-55.2863	0	0	757.874
SLC23A3	-2.33643	1.76096	-55.248	0	0	757.267
IFRD1	-2.41967	3.64818	-55.2354	0	0	757.068
RXRG	4.71431	3.34522	55.2317	0	0	757.009
CDK13	-1.53905	4.13712	-55.1866	0	0	756.295
MEIS1	-1.99402	1.90533	-55.1765	0	0	756.136
TRIT1	-1.68701	4.46836	-55.1286	0	0	755.377
CHRDL1	-4.15176	4.29967	-55.1159	0	0	755.177
ZNF862	-1.86432	4.18437	-55.0982	0	0	754.896
PLA2G2C	1.3629	0.690183	55.082	0	0	754.64
METTL3	-2.022	5.32316	-55.0655	0	0	754.377
THOC1	-1.9144	4.35667	-55.0281	0	0	753.786
POLR3E	-1.48067	4.62158	-55.0276	0	0	753.777
MKNK1	-1.77506	4.05253	-55.0241	0	0	753.722
ELL3	-1.95032	1.28137	-54.9814	0	0	753.045
AZI2	-1.65306	3.74122	-54.947	0	0	752.499
DAZAP1	-1.47834	5.80934	-54.9422	0	0	752.424
MKS1	-1.60581	3.24064	-54.8916	0	0	751.621
GABBR1	-2.88764	4.76264	-54.8916	0	0	751.62
RNF112	-1.95554	1.57613	-54.8685	0	0	751.254
CFAP69	-1.99405	2.85654	-54.8596	0	0	751.113
RHOT2	-1.93478	6.57207	-54.8361	0	0	750.741
PARL	-2.14518	4.61994	-54.8294	0	0	750.634
SRSF4	-1.70521	6.33743	-54.8139	0	0	750.388
RDH13	-1.38387	3.10387	-54.8006	0	0	750.177
CAPN3	-3.09285	2.83771	-54.796	0	0	750.104
C1R	-3.98671	6.99923	-54.7932	0	0	750.058
NEURL2	-2.20878	2.1424	-54.7521	0	0	749.407
RNPC3	-3.00626	4.7962	-54.7469	0	0	749.323
CD63	1.45209	9.73426	54.7432	0	0	749.264
RPS15A	-2.2688	6.15297	-54.714	0	0	748.8
NELFCD	-1.52243	6.13516	-54.6917	0	0	748.446
PITPNM2	-1.74246	3.15521	-54.6787	0	0	748.239
MARK1	-1.55709	2.52664	-54.6746	0	0	748.175
P2RY11	-2.15159	3.5609	-54.6595	0	0	747.934
TSTD3	-1.48604	2.03291	-54.6241	0	0	747.372
SOX5	-1.20755	1.2952	-54.5943	0	0	746.899
LMNTD2	-2.71114	3.26146	-54.5773	0	0	746.627
DYNLRB1	-2.49512	5.05017	-54.5747	0	0	746.587
BCL2L2-PABPN1	-2.3106	1.48675	-54.5716	0	0	746.538
BABAM1	-1.63486	5.18063	-54.5345	0	0	745.947
TAZ	-2.19169	4.96424	-54.5134	0	0	745.612
MTMR3	-1.60382	3.18949	-54.5075	0	0	745.518
NAPA	-1.60406	5.59227	-54.5013	0	0	745.42
PDGFRA	-3.13952	3.32026	-54.462	0	0	744.793
DENND3	-1.62946	3.85016	-54.4277	0	0	744.247
RABGEF1	-1.38194	2.30142	-54.4188	0	0	744.106
DUSP4	2.63625	2.76713	54.3246	0	0	742.606
NDRG2	-1.82696	5.59974	-54.31	0	0	742.373
GNAI3	1.74994	3.61747	54.2754	0	0	741.821
ALG9	-1.3391	2.80894	-54.2368	0	0	741.206
PRCD	-1.51063	1.3623	-54.2274	0	0	741.057
RADIL	-1.82839	1.78014	-54.2194	0	0	740.928
JAM3	-2.57041	3.77603	-54.1721	0	0	740.174
DPY19L2	-2.74814	3.84314	-54.1538	0	0	739.882
CFAP206	-1.23593	0.776652	-54.1513	0	0	739.841
WASF3	-2.23058	4.17365	-54.1379	0	0	739.628
COMMD3	-1.71934	4.26944	-54.1294	0	0	739.493
CDKL3	-1.14161	1.45832	-54.1163	0	0	739.284
PMM2	-1.78502	2.56161	-54.0757	0	0	738.635
AP1S1	1.38167	5.71853	54.0703	0	0	738.55
ASIC3	-2.20638	2.13568	-54.0464	0	0	738.167
RAB13	-1.95266	5.70579	-54.0089	0	0	737.569
COX16	-1.72998	4.66593	-53.9782	0	0	737.078
DES	-4.65227	4.29575	-53.9728	0	0	736.992
APBA3	-1.46605	4.07962	-53.9723	0	0	736.984
CAPRIN2	-1.69589	3.8629	-53.9564	0	0	736.731
RBM39	-1.6893	6.93652	-53.9522	0	0	736.663
FAM71F2	-1.71025	1.74138	-53.9465	0	0	736.571
KIAA0895L	-2.73845	4.92345	-53.915	0	0	736.069
NUDT6	-1.41821	1.93785	-53.8954	0	0	735.755
AKR1C1	-2.96653	2.73241	-53.8854	0	0	735.595
NEURL4	-1.71632	4.55646	-53.8422	0	0	734.905
POMK	1.88244	2.35183	53.7884	0	0	734.044
MTA1	-1.9594	5.60953	-53.7882	0	0	734.041
RELN	-2.02355	1.54139	-53.7852	0	0	733.992
C10orf95	-1.69952	1.11899	-53.7748	0	0	733.826
IFT172	-1.8639	4.02647	-53.7663	0	0	733.69
ABHD17A	-1.88932	5.25342	-53.7209	0	0	732.963
PRH1	-1.65438	1.40103	-53.6657	0	0	732.079
PCBP2	-1.55459	7.12245	-53.6227	9.88131291682493e-324	2.56914135837448e-322	731.391
SPPL2B	-1.9683	5.1135	-53.6122	9.88131291682493e-324	2.56914135837448e-322	731.223
NPIPB12	-1.63538	1.1034	-53.5921	1.97626258336499e-323	5.13828271674896e-322	730.901
THBS3	-2.33099	4.73493	-53.5594	3.95252516672997e-323	1.02765654334979e-321	730.376
CLN5	-1.48344	2.78989	-53.5455	3.95252516672997e-323	1.02765654334979e-321	730.154
NECAP1	-1.2464	4.24667	-53.5026	7.90505033345994e-323	2.05037243024117e-321	729.467
BLOC1S1	-2.49604	4.97203	-53.501	8.89318162514244e-323	2.30234590962021e-321	729.441
EIF3E	-2.15747	5.99424	-53.4807	1.18575755001899e-322	3.06320700421573e-321	729.116
ECHDC2	-2.05651	6.19826	-53.4622	1.58101006669199e-322	4.07604157819028e-321	728.818
WRAP73	-1.52969	4.16807	-53.4518	1.87744945419674e-322	4.8369026727858e-321	728.651
FGF10	-2.50836	1.70605	-53.3827	5.73116149175846e-322	1.4733037558986e-320	727.543
CACTIN	-1.55844	4.02203	-53.3405	1.14623229835169e-321	2.94265498663046e-320	726.865
RGMA	-1.7664	1.81331	-53.3234	1.50195956335739e-321	3.84975951239499e-320	726.592
UQCR11	-1.66042	5.38859	-53.3085	1.90709339294721e-321	4.88038044961983e-320	726.351
COQ8B	-1.67141	4.50478	-53.2975	2.27270197086973e-321	5.80675353557217e-320	726.175
ITPR1	-2.66897	3.98203	-53.2893	2.58890398420813e-321	6.60466955360578e-320	726.043
ASPG	-3.01719	2.1992	-53.2882	2.64819186170908e-321	6.74547826267054e-320	726.026
FAN1	-1.65221	3.26356	-53.2361	6.10665138259781e-321	1.55309535770196e-319	725.188
SLC6A16	-1.82987	1.81233	-53.2293	6.80822459969238e-321	1.72888391449227e-319	725.079
TBC1D30	-1.07428	1.12697	-53.2215	7.70742407512345e-321	1.95422725556047e-319	724.955
HDAC3	-1.31343	5.6367	-53.2123	8.95246950264339e-321	2.26642733716755e-319	724.806
LHX4	-1.45792	1.34817	-53.2076	9.63428009390431e-321	2.43529897491609e-319	724.732
ROBO3	-2.32462	2.79997	-53.2057	9.94060079432588e-321	2.50886534958185e-319	724.7
TATDN2	-1.24637	4.75767	-53.1695	1.77962445632017e-320	4.48463386730099e-319	724.118
ZNF700	-1.83238	3.88591	-53.1511	2.393253988455e-320	6.02182031120687e-319	723.822
DPP6	-3.34692	3.13913	-53.1316	3.27071457546905e-320	8.21710219537328e-319	723.51
BIN3	-1.38836	3.95696	-53.1144	4.31418121948576e-320	1.08221621262004e-318	723.233
TUBGCP4	-1.45018	2.7583	-53.0976	5.65803977617396e-320	1.41717295787457e-318	722.962
RPS7	-1.72703	8.85747	-53.0741	8.24694376038209e-320	2.0624869198772e-318	722.585
TPGS1	-2.86804	3.23942	-52.9895	3.22130801088493e-319	8.04401123700925e-318	721.223
TIAF1	-1.69881	1.65498	-52.9448	6.60970902319336e-319	1.64803402407552e-317	720.504
PTOV1	-1.90183	5.36089	-52.9117	1.12723053361264e-318	2.80634474527109e-317	719.971
CCDC85A	-2.34187	2.92134	-52.8827	1.79778630946129e-318	4.46901497003902e-317	719.504
PHF20L1	-1.72848	3.93098	-52.8746	2.04865308179365e-318	5.08497253949705e-317	719.374
CEP95	-1.81634	4.83913	-52.8598	2.60030701931415e-318	6.44454485405122e-317	719.135
CCNL1	-2.21724	6.08658	-52.8584	2.65999014933177e-318	6.58257839638328e-317	719.112
PLA2R1	-2.99711	4.28328	-52.8471	3.19295852412656e-318	7.88966661144539e-317	718.93
LPAR5	3.75244	3.56031	52.8382	3.68668820532863e-318	9.09603509801194e-317	718.786
NPAS2	-2.55593	2.86646	-52.8306	4.1612086142204e-318	1.02514792503303e-316	718.665
APBB3	-2.38351	5.46949	-52.807	6.087264246655e-318	1.49741257840558e-316	718.285
MT1X	-3.87685	7.60677	-52.7967	7.18681722278761e-318	1.76526196799557e-316	718.119
GCHFR	-1.84233	1.7163	-52.7725	1.06183007594134e-317	2.60424477191807e-316	717.728
WDR61	-1.38482	5.1709	-52.7701	1.10400549573293e-317	2.70366688640138e-316	717.69
B3GAT2	-1.19069	0.926696	-52.769	1.12406950161055e-317	2.74872463576425e-316	717.672
USP49	-1.84576	2.73234	-52.7635	1.22879659655951e-317	3.00037227884985e-316	717.582
HSPE1	-2.38866	5.73514	-52.7626	1.2463932386018e-317	3.0388429473961e-316	717.568
SRSF2	-1.55314	7.37153	-52.7415	1.75138959279163e-317	4.26378118770098e-316	717.228
SRSF9	-1.83552	6.42793	-52.738	1.85301494361601e-317	4.50454560214656e-316	717.172
SMARCB1	-1.6206	5.17613	-52.6865	4.25495361799361e-317	1.0328274195772e-315	716.341
ACTL10	-1.38612	1.08588	-52.6796	4.7514135059546e-317	1.1516421640133e-315	716.23
XPR1	1.96595	4.40121	52.6293	1.07149597623658e-316	2.59327163815247e-315	715.417
LRRN4CL	-2.54234	2.11522	-52.554	3.61018184363073e-316	8.72469421730601e-315	714.203
EPC1	-1.39212	4.13902	-52.5477	3.99607695459775e-316	9.64316464914327e-315	714.101
ANKZF1	-2.0777	5.32044	-52.5429	4.31949262280482e-316	1.04005964785569e-314	714.024
SARM1	-1.33644	2.2631	-52.5429	4.32255494049087e-316	1.04005964785569e-314	714.023
OLFM1	-2.25331	2.93974	-52.5254	5.7313093161997e-316	1.37701588913058e-314	713.741
MIF	-2.04901	1.27043	-52.5059	7.85916260321863e-316	1.88551363269934e-314	713.425
KCNAB3	-1.69081	1.68978	-52.4964	9.15208901942147e-316	2.19251642038894e-314	713.273
NECTIN4	3.59505	2.18797	52.4483	1.99274135247699e-315	4.76698387905324e-314	712.495
FABP4	-4.87915	5.96529	-52.4375	2.37320458715788e-315	5.66890230346342e-314	712.32
ZNF224	-1.77131	3.64315	-52.4279	2.77128402888062e-315	6.61023326291039e-314	712.165
EXOSC10	-1.5134	5.22961	-52.3519	9.46164974306059e-315	2.25359293879721e-313	710.938
LPIN3	-2.18416	5.00655	-52.3498	9.79926518401246e-315	2.33064367620339e-313	710.902
CTDNEP1	-1.45279	6.54084	-52.3414	1.12136820658509e-314	2.66320915366277e-313	710.768
PAOX	-1.8079	1.79158	-52.3363	1.2181087639655e-314	2.88880793936735e-313	710.685
MET	3.1327	5.5841	52.335	1.24434417149299e-314	2.94679266783863e-313	710.664
HMGA2	2.92112	1.40005	52.3049	2.0253446733006e-314	4.78944687358867e-313	710.177
PHC1	-1.97654	4.0196	-52.2598	4.20083665328092e-314	9.91974389114906e-313	709.447
GLT1D1	2.53834	2.21232	52.2521	4.75973400620834e-314	1.12234527866195e-312	709.322
GBF1	-1.71046	5.16938	-52.2468	5.18744773165071e-314	1.22145523906611e-312	709.236
HEMK1	-1.60407	3.55344	-52.2204	7.94652737367478e-314	1.86845271837367e-312	708.81
PTGIR	-2.87984	3.33139	-52.1917	1.26529916942753e-313	2.97084325612733e-312	708.345
FGF7	-3.04524	3.02647	-52.1545	2.31101172974493e-313	5.41840335385924e-312	707.743
EMC2	-1.25882	5.1567	-52.1461	2.64790156711483e-313	6.19946996692194e-312	707.607
SPINT1	1.87318	6.75686	52.1379	3.0229702662994e-313	7.06758459143761e-312	707.474
TSEN15	-1.44038	4.26356	-52.1161	4.30715636231759e-313	1.0055717527076e-311	707.12
VAMP8	1.6113	8.1964	52.1056	5.10227877172897e-313	1.18952278822236e-311	706.951
PHYKPL	-1.60497	4.92101	-52.0727	8.70401734611701e-313	2.02635416523293e-311	706.417
ACAP3	-2.12213	4.68804	-52.0723	8.76446214927552e-313	2.03755228501305e-311	706.41
BIVM	-1.4161	3.44189	-52.0638	1.00541429195961e-312	2.33408836892893e-311	706.273
ADORA1	2.6438	3.23548	52.0337	1.63623187117966e-312	3.79320832383327e-311	705.786
LDLRAD2	-1.56836	1.60385	-52.0326	1.66763664431896e-312	3.86059052610496e-311	705.767
GLI4	-1.7185	3.66102	-52.0252	1.87979577291721e-312	4.34564552209672e-311	705.647
TIGD1	-1.7802	2.84566	-52.018	2.11158414550399e-312	4.87465844834823e-311	705.531
NAA10	-2.08357	4.66614	-51.96	5.41252891810781e-312	1.2477542223783e-310	704.59
MAZ	-1.93571	4.11932	-51.9458	6.81266066238105e-312	1.56833719516404e-310	704.36
NPIPB4	-2.02483	1.91509	-51.924	9.70122881558393e-312	2.23020171072461e-310	704.006
FAHD2B	-1.53315	1.98027	-51.8854	1.81478793364961e-311	4.1661877097108e-310	703.38
POLA2	-1.3962	2.58024	-51.8214	5.1259338845519e-311	0	702.342
TCHP	-1.34536	3.76162	-51.8046	6.73725942435023e-311	0	702.069
CLASRP	-1.87064	5.66785	-51.7347	2.09845817638958e-310	0	700.933
LAMC2	2.3932	5.24827	51.7141	2.93044789519246e-310	0	700.599
PRR4	-1.87395	1.9848	-51.7074	3.26606463940608e-310	0	700.491
PLEKHH2	-2.21927	2.84141	-51.7048	3.40720230444416e-310	0	700.448
ZNF511	-1.6702	4.04493	-51.7035	3.47951338606744e-310	0	700.427
EIF2B5	-1.25082	5.24427	-51.7025	3.54049002010037e-310	0	700.41
DENND4B	-1.368	4.9066	-51.6636	6.66452338021376e-310	0	699.777
KAT5	-1.66035	4.73017	-51.6616	6.87956070184682e-310	0	699.746
TAGLN	-3.25775	6.84072	-51.6615	6.89002587350755e-310	0	699.744
C16orf95	-0.825239	0.732783	-51.6543	7.74265010251858e-310	0	699.628
TMEM8B	-1.68451	4.62903	-51.6484	8.52611414894416e-310	0	699.531
C3orf33	-1.59793	3.15213	-51.6471	8.70710874040643e-310	0	699.51
SERPINA1	5.18395	6.18676	51.6368	0	2.31641e-308	699.342
ZNF497	-1.72425	2.10487	-51.6186	0	3.1072e-308	699.047
LCAT	-2.49769	4.96065	-51.6172	0	3.17372e-308	699.025
DAAM2	-2.56126	3.65471	-51.6002	0	4.17897e-308	698.748
TMEM199	-1.17779	3.41336	-51.5824	0	5.57536e-308	698.459
TNS2	-1.9012	6.8338	-51.5382	0	1.1433e-307	697.739
GTF2IRD2B	-1.40779	3.04929	-51.5207	0	1.51914e-307	697.454
GOLGA7	-1.85558	4.39762	-51.5132	0	1.71328e-307	697.332
RASSF4	-2.36464	6.56602	-51.4985	0	2.17227e-307	697.093
DNAJB11	-2.15916	5.51843	-51.485	0	2.70269e-307	696.874
PEX1	-1.47023	3.80568	-51.4801	0	2.92484e-307	696.793
SELENOP	-2.54159	5.3033	-51.4658	0	3.68623e-307	696.561
SS18L2	-1.14303	4.55826	-51.4513	0	4.65715e-307	696.326
PRELID1	-1.63243	5.62847	-51.4458	2.30154e-308	5.08556e-307	696.236
TANGO2	-1.59393	3.72096	-51.4409	2.49251e-308	5.50017e-307	696.157
DDX17	-1.90899	8.56871	-51.4356	2.71795e-308	5.98966e-307	696.07
PRR15	4.9843	3.66243	51.4222	3.38466e-308	7.44895e-307	695.851
TMEM259	-1.73772	7.23309	-51.3885	5.853e-308	1.28641e-306	695.303
LSR	1.6382	6.59932	51.3713	7.74515e-308	1.70002e-306	695.023
CLCN2	-1.31836	2.20986	-51.3671	8.29504e-308	1.8183e-306	694.955
GHR	-1.77943	2.33655	-51.3406	1.27878e-307	2.7994e-306	694.522
MGP	-2.84447	8.9027	-51.3387	1.31884e-307	2.88329e-306	694.491
CBWD5	-1.1403	1.59447	-51.3292	1.53955e-307	3.36134e-306	694.336
BOLA3	-1.64818	3.15178	-51.308	2.17327e-307	4.73871e-306	693.992
LSMEM1	-1.93598	1.50188	-51.2809	3.37935e-307	7.35878e-306	693.55
RPL9	-1.98099	9.4172	-51.2793	3.47097e-307	7.54833e-306	693.523
RAB3IL1	-2.13313	3.92225	-51.2556	5.10826e-307	1.10943e-305	693.137
TMEM86B	-2.29672	3.27485	-51.24	6.59029e-307	1.42943e-305	692.882
TWIST2	-2.53454	2.46082	-51.2345	7.20733e-307	1.56121e-305	692.793
ANKRD39	-1.19494	2.38239	-51.212	1.0398e-306	2.24941e-305	692.427
ERCC3	-1.49462	5.11334	-51.2021	1.22138e-306	2.63876e-305	692.266
EEF1D	-1.64888	5.41815	-51.1771	1.83685e-306	3.96327e-305	691.858
C16orf86	-1.73071	2.95461	-51.1575	2.53085e-306	5.45355e-305	691.537
LRRC14	-1.5279	4.33569	-51.1423	3.23992e-306	6.97237e-305	691.29
TSPYL2	-2.42306	6.50328	-51.1344	3.68867e-306	7.92775e-305	691.161
F10	-2.41486	2.54526	-51.1299	3.96875e-306	8.51862e-305	691.087
SCML1	-1.95753	3.35302	-51.1129	5.23824e-306	1.12289e-304	690.81
CORT	-1.46334	1.39846	-51.1082	5.65064e-306	1.20972e-304	690.734
EML6	-1.8002	2.2742	-51.1012	6.33929e-306	1.35539e-304	690.619
RAPH1	-1.95999	2.58534	-51.0954	6.96904e-306	1.48811e-304	690.524
SREK1	-1.66702	4.86169	-51.0833	8.48856e-306	1.81023e-304	690.327
CEP290	-1.61432	2.8258	-51.0599	1.24317e-305	2.64771e-304	689.946
FBLN5	-2.33059	5.41606	-51.0414	1.68176e-305	3.57722e-304	689.644
DXO	-1.57978	5.21979	-51.0134	2.65624e-305	5.64272e-304	689.187
CORO2A	2.15087	2.58021	50.9848	4.24118e-305	8.99807e-304	688.719
GINS2	1.80114	2.09872	50.9572	6.65866e-305	1.41088e-303	688.268
FAM229A	-2.43477	3.25891	-50.9375	9.18325e-305	1.94332e-303	687.947
ZNF783	-1.4661	3.80867	-50.9312	1.0171e-304	2.14959e-303	687.844
AMDHD2	-1.58883	4.12721	-50.919	1.24265e-304	2.62292e-303	687.644
SYP	-1.17772	1.69667	-50.9114	1.40781e-304	2.96773e-303	687.519
NDUFV1	-1.28	7.07559	-50.8148	6.82637e-304	1.43719e-302	685.941
TTC21A	-1.59492	2.76766	-50.809	7.5025e-304	1.57753e-302	685.847
FGF17	-2.74247	2.46239	-50.7983	8.9415e-304	1.87772e-302	685.671
FAM193B	-2.19692	5.33053	-50.705	4.11555e-303	8.63167e-302	684.145
NRCAM	2.51184	3.14936	50.6878	5.44833e-303	1.14125e-301	683.864
ZNF235	-1.10493	2.12943	-50.6497	1.01656e-302	2.12665e-301	683.241
SRCIN1	1.92857	1.64846	50.6057	2.09089e-302	4.36863e-301	682.52
MYO15B	-2.88657	5.41612	-50.5881	2.78815e-302	5.81811e-301	682.232
ABCA8	-3.04244	3.84336	-50.5667	3.96147e-302	8.25606e-301	681.881
ANAPC10	-1.09006	2.68242	-50.4889	1.41752e-301	2.95051e-300	680.606
NFASC	-1.87808	1.94312	-50.4783	1.68709e-301	3.50719e-300	680.432
CCDC116	-0.843555	0.777237	-50.4727	1.84917e-301	3.83929e-300	680.34
ZDHHC11B	-2.43692	2.43279	-50.4703	1.92134e-301	3.98413e-300	680.302
D2HGDH	-2.18125	5.20197	-50.4477	2.78657e-301	5.77104e-300	679.93
WDR90	-1.88617	4.35248	-50.4402	3.15112e-301	6.51785e-300	679.808
CLSTN2	-2.19389	1.81506	-50.4376	3.28461e-301	6.78545e-300	679.766
ADGRG3	-2.76205	2.16308	-50.431	3.66306e-301	7.55781e-300	679.657
L3HYPDH	-1.83711	3.60064	-50.4165	4.64581e-301	9.5735e-300	679.419
FAM160B2	-1.71936	5.79993	-50.3812	8.28624e-301	1.70539e-299	678.841
RTTN	-1.02137	1.74332	-50.3456	1.487e-300	3.0566e-299	678.256
SUGP2	-1.65607	6.20012	-50.3403	1.62237e-300	3.3307e-299	678.169
TMEM200B	-1.9963	2.17988	-50.3142	2.48746e-300	5.10036e-299	677.742
ENOSF1	-1.89145	4.88978	-50.3105	2.64311e-300	5.4128e-299	677.681
KIAA2013	1.303	6.26899	50.2988	3.20381e-300	6.55293e-299	677.489
HAUS4	-1.8046	4.69252	-50.2902	3.68758e-300	7.53307e-299	677.348
CLCN6	-1.49726	4.22682	-50.2216	1.13756e-299	2.32096e-298	676.222
MAPK8IP3	-2.39951	5.36789	-50.1947	1.76957e-299	3.60598e-298	675.78
TARDBP	-1.11439	6.19111	-50.1839	2.11513e-299	4.30486e-298	675.602
TMEM253	-2.14966	1.54338	-50.1813	2.20406e-299	4.48031e-298	675.561
COL27A1	-2.36765	3.35002	-50.1464	3.91602e-299	7.95052e-298	674.986
ZSWIM8	-1.6838	5.47034	-50.1441	4.06159e-299	8.23595e-298	674.95
NPIPB13	-1.52333	0.995936	-50.135	4.71771e-299	9.55466e-298	674.8
GSAP	-1.54502	4.27954	-50.1215	5.89053e-299	1.19153e-297	674.578
LYNX1	2.73643	2.66186	50.1061	7.59263e-299	1.53395e-297	674.324
SNAP23	-1.56826	3.66161	-50.0972	8.77847e-299	1.77136e-297	674.179
FLCN	-1.87331	4.78849	-50.0943	9.21597e-299	1.85737e-297	674.13
DGCR6	-2.32977	1.68071	-50.0685	1.40837e-298	2.83494e-297	673.706
SDHC	2.07216	5.08155	50.0543	1.77896e-298	3.57655e-297	673.473
PHLDB1	-2.17508	4.68427	-50.0481	1.96955e-298	3.95491e-297	673.371
HSPA12A	-1.87442	3.42185	-50.0467	2.01324e-298	4.03773e-297	673.349
RMI2	2.04088	2.12774	50.0308	2.61546e-298	5.23917e-297	673.088
FDPS	-1.57128	5.16459	-50.0259	2.83722e-298	5.6765e-297	673.006
GARNL3	-1.56396	2.48473	-50.008	3.80464e-298	7.60282e-297	672.713
CCDC57	-1.71282	3.9991	-50.008	3.81012e-298	7.60458e-297	672.711
GJB3	3.43218	2.04138	49.9964	4.60868e-298	9.1873e-297	672.521
ACKR2	-1.591	1.52248	-49.9777	6.26821e-298	1.24805e-296	672.214
ADAT2	-1.59487	2.60034	-49.9776	6.28012e-298	1.24891e-296	672.212
RBM6	-1.92967	6.32392	-49.97	7.11679e-298	1.41359e-296	672.087
IFT20	-1.24251	4.826	-49.9672	7.45247e-298	1.47849e-296	672.041
IZUMO4	-2.20345	2.733	-49.9617	8.15355e-298	1.61564e-296	671.951
RABL2A	-1.73278	3.65448	-49.9552	9.06939e-298	1.79496e-296	671.844
TBX22	-2.93361	2.53064	-49.9263	1.45882e-297	2.88375e-296	671.369
ASXL1	-1.63026	5.04253	-49.92	1.61912e-297	3.19679e-296	671.265
PLEKHJ1	-1.75097	5.72771	-49.9198	1.62356e-297	3.20173e-296	671.262
ANAPC15	-1.28516	3.21218	-49.8996	2.26548e-297	4.46229e-296	670.929
CCPG1	-1.658	4.35987	-49.8982	2.3169e-297	4.55813e-296	670.907
SDC1	2.49349	5.65195	49.8385	6.19199e-297	1.21673e-295	669.924
CLDN1	4.46199	5.46325	49.8342	6.64863e-297	1.3049e-295	669.853
CECR2	-1.92461	1.61352	-49.8328	6.80375e-297	1.33376e-295	669.83
SLC26A6	-2.07309	3.4591	-49.8318	6.91279e-297	1.35353e-295	669.814
AGTR1	-2.9064	2.84296	-49.8182	8.6476e-297	1.6912e-295	669.59
MST1	-2.65601	4.5954	-49.7975	1.21702e-296	2.3773e-295	669.248
WDR45	-1.54009	5.30832	-49.7938	1.29219e-296	2.52115e-295	669.188
PSMB2	1.05689	5.49375	49.7672	2.00476e-296	3.9068e-295	668.749
CCDC183	-1.83336	2.34807	-49.7516	2.59044e-296	5.04219e-295	668.493
MAP3K12	-2.23079	3.75569	-49.7161	4.64855e-296	9.03757e-295	667.908
SKP2	-1.46392	2.24158	-49.6883	7.3558e-296	1.42841e-294	667.45
VEGFA	-2.88498	7.79828	-49.653	1.31711e-295	2.55467e-294	666.867
ENGASE	-2.11118	4.91699	-49.6439	1.52838e-295	2.96097e-294	666.718
ST20	-1.93523	2.40574	-49.6153	2.45148e-295	4.74375e-294	666.246
CMC1	-0.881839	2.63348	-49.5973	3.29919e-295	6.37663e-294	665.949
SDC4	2.99572	8.14874	49.5672	5.41828e-295	1.04601e-293	665.453
TBC1D10A	-1.80451	4.34562	-49.5588	6.22294e-295	1.19995e-293	665.315
ARHGAP33	-2.55041	3.88313	-49.5581	6.29772e-295	1.21295e-293	665.303
COPS5	-0.996826	4.41292	-49.5445	7.87879e-295	1.5157e-293	665.079
LYRM4	1.49961	3.57173	49.5409	8.35733e-295	1.60589e-293	665.02
SCEL	3.7143	2.9194	49.5032	1.55748e-294	2.98928e-293	664.397
CCL27	-1.2012	0.698738	-49.4791	2.31926e-294	4.44619e-293	663.999
CLCNKA	-3.71824	3.75934	-49.4546	3.47128e-294	6.64698e-293	663.596
TSPOAP1	-2.22834	4.30027	-49.4531	3.56135e-294	6.81155e-293	663.571
C6	-1.88981	1.33765	-49.4414	4.32133e-294	8.25554e-293	663.377
HNRNPH1	-1.58001	7.29918	-49.429	5.29768e-294	1.01091e-292	663.173
MASP1	-1.71049	1.17135	-49.3976	8.89611e-294	1.6956e-292	662.655
LRP4	3.29134	3.96148	49.3922	9.73747e-294	1.85383e-292	662.565
TNNI3K	-1.43511	0.869954	-49.2739	6.87436e-293	1.30724e-291	660.611
RELL2	-1.84556	2.5147	-49.2647	8.00593e-293	1.52067e-291	660.459
PTCHD4	2.40304	2.12193	49.2607	8.54506e-293	1.6212e-291	660.393
FSD2	-1.33525	1.05693	-49.2464	1.08299e-292	2.05234e-291	660.157
IPPK	-1.40074	2.27686	-49.2433	1.13926e-292	2.1565e-291	660.106
NT5C	-1.48297	5.94671	-49.2366	1.27203e-292	2.40505e-291	659.996
SIRT7	-1.56652	4.25784	-49.2361	1.28305e-292	2.42312e-291	659.987
EYA1	-1.12575	0.757341	-49.233	1.35188e-292	2.5502e-291	659.935
FAHD2A	-1.50235	4.62263	-49.19	2.75027e-292	5.1822e-291	659.225
AGAP4	-1.65505	2.27535	-49.1758	3.47748e-292	6.54496e-291	658.99
MYO19	-1.48263	3.42939	-49.1425	6.04005e-292	1.1355e-290	658.438
IGSF10	-2.12588	1.53238	-49.1382	6.48453e-292	1.21768e-290	658.367
CFP	-1.50323	1.06401	-49.1333	7.02186e-292	1.31708e-290	658.288
PCSK6	-1.05093	0.835037	-49.1272	7.76831e-292	1.45543e-290	658.187
KLK2	-2.22943	1.88494	-49.0929	1.37145e-291	2.56657e-290	657.618
CCND1	2.20348	6.71658	49.0911	1.41205e-291	2.63955e-290	657.589
NDUFS2	-1.21643	5.60383	-49.0757	1.82281e-291	3.40353e-290	657.334
TAF4	-1.18243	3.26023	-49.0754	1.83174e-291	3.41636e-290	657.329
MED13L	-1.52127	3.78421	-49.0747	1.85257e-291	3.4513e-290	657.318
TNXB	-2.5188	3.41268	-49.0524	2.68048e-291	4.98805e-290	656.948
MXD3	-1.97826	2.7287	-49.0519	2.70088e-291	5.02035e-290	656.941
MAGEF1	1.35738	6.63572	49.0177	4.76158e-291	8.84079e-290	656.374
GPR89B	-1.11605	1.99922	-49.0166	4.84981e-291	8.99449e-290	656.356
HFM1	-1.45114	1.60785	-49.0003	6.34754e-291	1.1759e-289	656.086
RNF207	-2.31473	3.72669	-48.9734	9.90677e-291	1.8332e-289	655.641
POMT2	-1.42121	4.14509	-48.9688	1.06924e-290	1.97636e-289	655.565
PLCD4	-2.03148	1.6471	-48.9583	1.27419e-290	2.35255e-289	655.39
HOOK2	-1.71429	6.04993	-48.9548	1.34929e-290	2.48843e-289	655.333
LYRM9	-1.75763	4.23401	-48.9532	1.385e-290	2.55142e-289	655.306
LAD1	2.3709	3.39053	48.9239	2.24933e-290	4.13907e-289	654.822
DNAAF1	-2.09198	2.14916	-48.9131	2.69003e-290	4.94451e-289	654.643
SMIM14	1.67593	5.58082	48.9126	2.7148e-290	4.98447e-289	654.634
CKS2	2.42458	4.66947	48.9091	2.87672e-290	5.2759e-289	654.576
KLRK1	-2.82879	1.84396	-48.9014	3.26717e-290	5.98533e-289	654.448
PAXIP1	-1.22143	2.66477	-48.892	3.82091e-290	6.99201e-289	654.292
MDC1	-1.3739	4.71576	-48.8874	4.1238e-290	7.53792e-289	654.216
PAK3	-2.40426	2.6602	-48.8845	4.32508e-290	7.8971e-289	654.168
GAK	-1.32697	5.34679	-48.8138	1.39628e-289	2.54664e-288	652.996
MAPKBP1	-1.79207	4.04849	-48.8131	1.41234e-289	2.57308e-288	652.985
STX2	-1.50654	4.14595	-48.8103	1.47901e-289	2.69157e-288	652.939
PHB	-1.47874	6.10815	-48.7965	1.85821e-289	3.37793e-288	652.71
LRRC7	-1.40786	1.21939	-48.7664	3.06235e-289	5.56074e-288	652.211
PAPSS2	-2.36221	4.34706	-48.7644	3.16509e-289	5.74099e-288	652.178
ABLIM3	-1.86291	3.13867	-48.7435	4.48144e-289	8.11973e-288	651.83
FNTB	-1.26487	3.34378	-48.733	5.33198e-289	9.65019e-288	651.657
SOWAHB	2.09546	2.66541	48.7252	6.06892e-289	1.09719e-287	651.527
CAMK2N2	1.8929	1.0376	48.6902	1.08402e-288	1.95764e-287	650.947
GLA	-1.0948	3.65548	-48.6662	1.61374e-288	2.91108e-287	650.549
TFF1	-3.13465	2.41213	-48.6236	3.27337e-288	5.89611e-287	649.842
ANKRD36	-1.53222	1.68127	-48.6236	3.27561e-288	5.89611e-287	649.842
SLC22A5	-1.53372	3.54132	-48.6194	3.50834e-288	6.30813e-287	649.773
TMEM69	1.26772	5.24641	48.605	4.45996e-288	8.01046e-287	649.533
CFB	-3.32149	2.8608	-48.5968	5.11297e-288	9.17333e-287	649.396
CLDN9	3.25333	2.31041	48.5833	6.39514e-288	1.14613e-286	649.173
OPN1SW	-1.33144	0.834137	-48.567	8.38574e-288	1.50125e-286	648.902
MRPL12	-2.55064	4.79562	-48.5035	2.408e-287	4.30623e-286	647.847
PVRIG	-1.90762	1.3015	-48.4956	2.74386e-287	4.90153e-286	647.717
EXOC7	-1.68937	5.55715	-48.4829	3.38999e-287	6.04921e-286	647.505
BLOC1S2	1.09629	5.06012	48.4812	3.48723e-287	6.216e-286	647.477
ATG4B	-1.40095	5.5336	-48.4639	4.64454e-287	8.26999e-286	647.19
UBAP2	-1.38516	4.35675	-48.4624	4.76523e-287	8.47574e-286	647.165
UVSSA	-1.83088	3.5704	-48.4575	5.16268e-287	9.17279e-286	647.085
GTF2IRD2	-1.38933	2.30666	-48.4481	6.03927e-287	1.07187e-285	646.928
AMY2B	-2.67514	3.96616	-48.4299	8.16985e-287	1.44846e-285	646.626
CEACAM19	-2.29447	3.03924	-48.4008	1.32503e-286	2.34667e-285	646.142
ASXL3	-1.36361	1.20969	-48.3857	1.70407e-286	3.01472e-285	645.891
SMTN	-2.43286	4.5786	-48.3648	2.41255e-286	4.26355e-285	645.543
MRI1	-1.78453	4.16349	-48.3573	2.73327e-286	4.82518e-285	645.418
C6orf141	-1.96681	1.5806	-48.3553	2.82475e-286	4.98134e-285	645.385
TUG1	-1.45727	5.91366	-48.3435	3.43518e-286	6.05134e-285	645.19
MYSM1	-1.74916	3.90067	-48.3263	4.57635e-286	8.05301e-285	644.903
HGS	-1.86947	5.45103	-48.2896	8.42562e-286	1.48108e-284	644.293
FXN	-1.01778	2.51968	-48.2799	9.89472e-286	1.73747e-284	644.132
ABCC5	-1.76629	3.08768	-48.2707	1.15458e-285	2.02524e-284	643.978
IGHMBP2	-1.35969	3.47324	-48.2705	1.15745e-285	2.02811e-284	643.975
PNN	-1.49806	6.94906	-48.2534	1.53958e-285	2.69484e-284	643.69
TTLL13P	-0.57203	0.365556	-48.2326	2.17503e-285	3.80307e-284	643.345
BCS1L	-1.29693	4.89629	-48.218	2.77132e-285	4.84057e-284	643.102
TFCP2L1	-3.58767	4.81849	-48.2149	2.91976e-285	5.09445e-284	643.05
NBPF9	-1.77283	3.49018	-48.1951	4.0631e-285	7.0819e-284	642.72
PDHB	-1.16931	5.55213	-48.1746	5.71122e-285	9.94403e-284	642.379
VIPR1	-2.91018	3.00368	-48.1625	6.99077e-285	1.21591e-283	642.177
HCN3	-1.65081	2.62612	-48.1597	7.31919e-285	1.27169e-283	642.131
CCDC17	-1.69777	2.08829	-48.126	1.28275e-284	2.2264e-283	641.571
SFSWAP	-1.39108	4.63536	-48.1097	1.68206e-284	2.9164e-283	641.3
ZNF514	-2.0053	4.16433	-48.1003	1.9683e-284	3.40911e-283	641.142
GATC	-1.12635	4.3665	-48.0875	2.43656e-284	4.21571e-283	640.929
PPP1R3E	-1.89291	4.31286	-48.0629	3.66874e-284	6.34097e-283	640.52
TRABD	-1.52122	5.70619	-48.0613	3.76695e-284	6.50389e-283	640.493
HDDC3	-1.19386	2.85431	-48.0601	3.84778e-284	6.63651e-283	640.472
GRK5	-1.96705	4.65428	-48.0527	4.34859e-284	7.49247e-283	640.35
ZNF169	-1.35861	1.97098	-48.0442	5.01248e-284	8.62732e-283	640.208
IGF1	-3.52088	2.6632	-48.0296	6.39207e-284	1.09904e-282	639.965
IFT80	-1.58565	4.13756	-48.0182	7.72496e-284	1.32683e-282	639.775
HSF4	-3.01684	4.73122	-47.9995	1.05636e-283	1.81251e-282	639.463
MTFR1L	-1.22918	5.33649	-47.9331	3.19589e-283	5.47781e-282	638.356
PPP1R16A	-2.06491	5.26752	-47.9244	3.69141e-283	6.32058e-282	638.212
MAP3K10	-1.31038	3.64506	-47.9045	5.147e-283	8.80377e-282	637.879
GPR146	-1.73449	1.65409	-47.8882	6.75375e-283	1.15401e-281	637.608
ZNF75A	-1.33131	3.89968	-47.8575	1.12682e-282	1.92339e-281	637.096
SMCO3	-1.34881	0.878112	-47.836	1.61241e-282	2.74943e-281	636.738
MEIS2	-1.73187	2.29321	-47.8358	1.61945e-282	2.75858e-281	636.733
DHRS12	-1.34031	3.61721	-47.827	1.87492e-282	3.19045e-281	636.587
NPIPB3	-1.89906	1.73181	-47.8131	2.36349e-282	4.01768e-281	636.355
SYNE1	-2.13977	3.91187	-47.8068	2.62648e-282	4.46015e-281	636.25
ART4	-1.79346	1.70172	-47.7999	2.94815e-282	5.00124e-281	636.134
LAMB3	4.41626	3.46238	47.7842	3.82546e-282	6.48286e-281	635.874
CCZ1	-1.67252	2.71079	-47.742	7.73859e-282	1.31008e-280	635.169
DMTF1	-1.90673	5.40121	-47.7391	8.12164e-282	1.37352e-280	635.121
ULBP3	2.24162	2.71598	47.7293	9.57277e-282	1.61728e-280	634.957
POLR2I	-2.21889	5.15116	-47.7274	9.87876e-282	1.66727e-280	634.925
LSM8	-0.992125	3.53677	-47.7269	9.96811e-282	1.68063e-280	634.916
INTS3	-1.60866	5.45682	-47.707	1.38884e-281	2.33921e-280	634.585
MYH11	-3.59483	4.50306	-47.7027	1.49134e-281	2.50928e-280	634.514
CHD4	-2.38883	5.54073	-47.6966	1.65259e-281	2.77776e-280	634.411
POLI	-1.63909	4.30492	-47.6899	1.84667e-281	3.10082e-280	634.3
SERPINA3	-4.42039	2.601	-47.6801	2.17763e-281	3.65284e-280	634.135
INTS8	-1.40265	4.11084	-47.6592	3.08638e-281	5.17196e-280	633.786
MSANTD2	-1.75142	4.74786	-47.6103	6.98714e-281	1.16967e-279	632.97
CACNA1H	-2.25137	3.6272	-47.5931	9.30882e-281	1.55675e-279	632.683
MRPL14	1.60371	6.32877	47.5762	1.2354e-280	2.06391e-279	632.4
MYL5	-1.60878	3.43056	-47.5569	1.70629e-280	2.84772e-279	632.077
RPS27L	1.01041	4.78747	47.5487	1.95516e-280	3.25979e-279	631.941
PCGF3	-1.72541	4.96729	-47.5468	2.01875e-280	3.36242e-279	631.909
RASL11A	-2.23059	3.65009	-47.5177	3.28443e-280	5.46501e-279	631.422
TIMP4	-3.59281	3.31984	-47.5121	3.6048e-280	5.99203e-279	631.329
RPS4X	1.62666	10.3421	47.5102	3.71882e-280	6.17533e-279	631.298
CDK20	-1.40646	3.8608	-47.504	4.12503e-280	6.84298e-279	631.194
VEGFD	-1.65856	1.25703	-47.4906	5.16529e-280	8.56007e-279	630.969
BRAF	-1.28277	3.60329	-47.4828	5.88852e-280	9.74883e-279	630.838
SERPINB6	-1.17295	5.6931	-47.4479	1.05506e-279	1.74498e-278	630.255
NEIL1	-1.99626	3.97974	-47.4328	1.35894e-279	2.24531e-278	630.002
HOMER3	-1.63525	4.95621	-47.4289	1.44882e-279	2.39142e-278	629.938
MYOC	-4.37453	3.4319	-47.4221	1.62435e-279	2.67847e-278	629.824
HECTD4	-1.57715	4.30112	-47.4127	1.90096e-279	3.13146e-278	629.667
GABRB2	3.36625	1.66342	47.4042	2.19211e-279	3.60747e-278	629.524
FUCA1	1.81519	7.17948	47.3937	2.61064e-279	4.29195e-278	629.35
DGCR8	-1.39784	4.43331	-47.3555	4.94827e-279	8.12698e-278	628.71
PICK1	-1.24001	5.16363	-47.3519	5.25899e-279	8.62872e-278	628.649
MED25	-1.44889	5.67613	-47.3482	5.59022e-279	9.16307e-278	628.588
ZCCHC12	6.20887	4.47524	47.3346	7.02175e-279	1.14981e-277	628.36
SMIM8	-0.920406	2.29013	-47.311	1.04215e-278	1.70483e-277	627.966
TYW5	-1.22354	2.61865	-47.2951	1.36107e-278	2.22433e-277	627.699
PMF1	-1.44116	5.59492	-47.2901	1.48011e-278	2.41649e-277	627.615
NRDE2	-0.994083	2.78263	-47.2868	1.5619e-278	2.5475e-277	627.561
POLR1C	-1.29273	4.5862	-47.2821	1.69163e-278	2.75638e-277	627.481
GPR89A	-0.865756	1.83863	-47.263	2.32693e-278	3.7878e-277	627.163
SERF2	-1.50526	7.05335	-47.2615	2.38786e-278	3.88315e-277	627.137
ERCC5	-1.08164	1.53968	-47.2606	2.42399e-278	3.93804e-277	627.122
EIF3I	-1.30135	7.00675	-47.2593	2.47614e-278	4.0188e-277	627.1
TAF6L	-1.23204	4.27687	-47.2553	2.64807e-278	4.29361e-277	627.033
ZNF827	-1.351	3.43834	-47.2325	3.88059e-278	6.28588e-277	626.651
SLC35F2	1.83399	4.00039	47.2263	4.30384e-278	6.96462e-277	626.548
PDZD11	1.1028	6.01837	47.2191	4.85917e-278	7.85558e-277	626.426
CCDC149	-1.29698	3.62961	-47.2122	5.45399e-278	8.80856e-277	626.311
HOXA3	-1.30517	1.24639	-47.1785	9.58205e-278	1.54605e-276	625.748
VTI1B	-1.2384	5.07002	-47.176	1.00039e-277	1.61255e-276	625.704
KMT2B	-1.4251	4.97749	-47.173	1.05155e-277	1.69335e-276	625.655
TBC1D2	2.16455	4.91088	47.1706	1.0951e-277	1.76176e-276	625.614
ATXN2	-1.27472	3.98471	-47.149	1.57076e-277	2.52453e-276	625.253
HGF	-1.86446	1.96616	-47.1468	1.63154e-277	2.61967e-276	625.215
FABP5	-2.76777	3.88738	-47.1387	1.86897e-277	2.99799e-276	625.08
RAVER1	-1.91584	4.69376	-47.1302	2.15395e-277	3.45176e-276	624.938
SH3BP5	-2.028	3.9737	-47.1271	2.26936e-277	3.63318e-276	624.886
YTHDC2	-1.39822	4.12639	-47.1107	2.98323e-277	4.77144e-276	624.612
STK32B	-1.37121	1.4354	-47.0986	3.65789e-277	5.84484e-276	624.408
RBMS1	-1.45179	4.74797	-47.0656	6.35411e-277	1.01432e-275	623.856
CNTD1	-1.15532	1.25923	-47.0613	6.83574e-277	1.09015e-275	623.783
CUZD1	-1.19902	0.734595	-47.0601	6.97328e-277	1.11101e-275	623.763
SLC22A23	-1.47484	2.51559	-47.0535	7.79184e-277	1.24023e-275	623.652
SPAG5	-2.08579	3.41371	-47.0335	1.08828e-276	1.73056e-275	623.318
CREBZF	-1.72519	5.74468	-47.031	1.13664e-276	1.80572e-275	623.275
COG2	-1.43613	3.58467	-47.0209	1.34642e-276	2.13692e-275	623.105
LIFR	-2.5787	4.60039	-46.9998	1.91784e-276	3.04091e-275	622.752
PRPF39	-1.49267	4.91498	-46.9865	2.39465e-276	3.79329e-275	622.53
RPAIN	-1.20595	3.89746	-46.9859	2.41886e-276	3.82797e-275	622.52
ARID3B	-1.22824	2.58133	-46.9735	2.97976e-276	4.7111e-275	622.311
VPS4A	-1.06891	5.68157	-46.9481	4.5616e-276	7.20514e-275	621.885
EDC4	-1.72446	5.11327	-46.9476	4.59676e-276	7.25373e-275	621.878
CCZ1B	-1.33385	2.53358	-46.9471	4.63961e-276	7.31437e-275	621.868
PRICKLE2	-1.55748	3.2356	-46.9365	5.53931e-276	8.72441e-275	621.691
FADS3	-1.97406	4.34522	-46.9285	6.34009e-276	9.97612e-275	621.556
CUL9	-1.25432	4.20032	-46.9271	6.49093e-276	1.02037e-274	621.533
ZDHHC23	-1.47386	3.28932	-46.909	8.78603e-276	1.37985e-274	621.23
MAB21L1	-1.45828	1.16392	-46.902	9.88305e-276	1.55066e-274	621.112
DSEL	-1.07586	1.3094	-46.8878	1.25409e-275	1.96582e-274	620.874
GPR17	-2.36076	1.87168	-46.8474	2.47401e-275	3.87438e-274	620.195
DIP2A	-1.34644	3.93256	-46.838	2.89566e-275	4.53041e-274	620.038
ATF7	-1.18784	4.24743	-46.8337	3.10928e-275	4.86002e-274	619.967
PSD3	2.12058	3.24397	46.8321	3.19465e-275	4.98874e-274	619.939
SRRM2	-1.7156	8.06561	-46.8125	4.44502e-275	6.93473e-274	619.609
LPIN1	-1.30065	4.16658	-46.8078	4.81008e-275	7.49718e-274	619.53
C12orf57	-1.71438	6.03928	-46.7965	5.8125e-275	9.05105e-274	619.341
DUS4L	-1.05865	2.3692	-46.7963	5.82796e-275	9.06656e-274	619.338
RNF103	-1.11275	3.99897	-46.7867	6.84635e-275	1.06408e-273	619.177
LENG8	-2.57715	7.65929	-46.784	7.16192e-275	1.11209e-273	619.132
MANEAL	1.51993	2.08246	46.7688	9.24805e-275	1.43466e-273	618.877
STK36	-1.73336	4.79924	-46.7569	1.12936e-274	1.75035e-273	618.677
ZNF662	-1.60418	3.32388	-46.743	1.42785e-274	2.21088e-273	618.442
KXD1	-1.19771	5.26686	-46.7414	1.46679e-274	2.26906e-273	618.416
DTD2	-1.40742	2.53561	-46.7296	1.78801e-274	2.76338e-273	618.218
RIPK1	-1.20332	4.56069	-46.7034	2.77449e-274	4.28398e-273	617.778
GLTP	1.05207	6.11163	46.6426	7.71182e-274	1.18964e-272	616.756
QTRT1	-1.64968	6.19501	-46.6336	8.96964e-274	1.38238e-272	616.605
LIMS2	-2.28095	4.59682	-46.6172	1.18098e-273	1.81841e-272	616.33
RPS3A	-1.68609	9.22037	-46.6011	1.54906e-273	2.38292e-272	616.059
TRMU	-1.29009	3.72055	-46.5853	2.02064e-273	3.10546e-272	615.793
JMJD8	-1.64182	5.43413	-46.5615	3.01564e-273	4.63034e-272	615.393
USP53	-1.8809	3.72662	-46.5577	3.21408e-273	4.93045e-272	615.329
BIN1	-1.24772	5.17636	-46.5563	3.29056e-273	5.04308e-272	615.306
CLIC1	1.18443	8.41378	46.5498	3.66963e-273	5.61882e-272	615.197
KANSL3	-1.15977	5.1999	-46.546	3.91345e-273	5.9866e-272	615.132
NPR2	-1.73927	3.35024	-46.5201	6.04339e-273	9.23632e-272	614.698
CTSS	2.55435	5.10299	46.5066	7.59136e-273	1.15914e-271	614.47
ELMOD3	-1.32474	4.05958	-46.5048	7.82361e-273	1.1935e-271	614.44
NSMCE4A	-1.02553	4.98244	-46.5003	8.44557e-273	1.28719e-271	614.363
RHNO1	1.3175	4.68376	46.493	9.54567e-273	1.45351e-271	614.241
C1S	-3.5706	6.45848	-46.4868	1.05945e-272	1.61173e-271	614.137
CCDC30	-1.29282	2.09846	-46.4582	1.71406e-272	2.60518e-271	613.656
HAND2	-1.97815	1.6053	-46.4575	1.73265e-272	2.63101e-271	613.645
CCL21	-5.82372	7.04321	-46.4518	1.90884e-272	2.89589e-271	613.548
KDM2B	-1.10044	3.15338	-46.4516	1.91437e-272	2.90162e-271	613.545
ARHGEF28	-1.96092	3.42639	-46.4484	2.01996e-272	3.05885e-271	613.491
APOBEC3D	-1.6825	1.38723	-46.4264	2.92553e-272	4.42611e-271	613.121
AKR1C2	-2.85664	2.41017	-46.4194	3.2896e-272	4.97236e-271	613.004
TMEM60	1.15338	5.46159	46.4106	3.81857e-272	5.76664e-271	612.855
RHBDD2	1.37257	7.73352	46.3998	4.57584e-272	6.90391e-271	612.674
RSPO3	-2.08171	1.78626	-46.3976	4.75424e-272	7.16653e-271	612.636
MBD6	-2.13561	6.5758	-46.3891	5.48576e-272	8.26167e-271	612.493
POLR3H	-1.28257	4.0494	-46.3876	5.62632e-272	8.46563e-271	612.467
NGEF	3.3928	2.27507	46.3781	6.6021e-272	9.92479e-271	612.307
NFATC2IP	-1.2845	4.54036	-46.3623	8.60919e-272	1.29302e-270	612.042
SCN3A	-1.19394	1.03248	-46.3558	9.59735e-272	1.44013e-270	611.933
AGK	-1.22106	3.82793	-46.3516	1.03012e-271	1.54434e-270	611.863
CD36	-3.13269	4.62263	-46.3472	1.11036e-271	1.66312e-270	611.788
AMD1	-1.3068	5.4303	-46.3331	1.40689e-271	2.10536e-270	611.551
TUBE1	-1.66996	3.935	-46.333	1.40913e-271	2.1068e-270	611.549
ZNF789	-1.34194	2.99481	-46.3241	1.63638e-271	2.44435e-270	611.4
KLHL10	-0.953574	0.945139	-46.3141	1.93651e-271	2.89006e-270	611.232
LCMT1	1.04833	5.24469	46.307	2.1832e-271	3.25528e-270	611.112
TNRC6A	-1.41966	4.66237	-46.2953	2.65828e-271	3.96007e-270	610.915
PPIL2	-1.38219	5.43345	-46.283	3.27381e-271	4.87263e-270	610.707
BRICD5	-2.45212	4.19871	-46.2804	3.41978e-271	5.08531e-270	610.663
ARMC12	-1.72465	1.6528	-46.2641	4.49916e-271	6.68435e-270	610.389
FBXL6	-1.62627	3.98861	-46.2615	4.70338e-271	6.98148e-270	610.344
FBF1	-2.2143	4.18161	-46.2339	7.47986e-271	1.10928e-269	609.881
AAAS	-1.22735	5.49447	-46.222	9.14331e-271	1.35475e-269	609.68
AGAP9	-2.47056	3.38053	-46.1913	1.53498e-270	2.27232e-269	609.162
SLC31A2	-1.08779	0.922217	-46.1717	2.13433e-270	3.15674e-269	608.832
CCDC66	-1.33856	3.393	-46.1643	2.41842e-270	3.57372e-269	608.707
IRAK3	-1.70741	2.50948	-46.164	2.42939e-270	3.58672e-269	608.703
PREX2	-2.02862	3.19349	-46.1405	3.61328e-270	5.32983e-269	608.306
DUSP6	2.74518	6.5847	46.1377	3.78533e-270	5.57862e-269	608.259
SULT1A4	-0.844654	0.494686	-46.1372	3.81739e-270	5.62086e-269	608.251
PKHD1L1	-4.05427	4.36482	-46.1367	3.84878e-270	5.66203e-269	608.243
PLPP7	-1.29648	1.46866	-46.1281	4.44961e-270	6.5401e-269	608.098
KIFC2	-2.34385	4.39571	-46.122	4.93668e-270	7.24955e-269	607.994
WHRN	-1.64794	3.63688	-46.1199	5.1156e-270	7.50561e-269	607.958
NPTXR	1.97725	3.69355	46.1119	5.85381e-270	8.58108e-269	607.824
SF3B4	1.23988	6.63646	46.1076	6.29399e-270	9.21816e-269	607.751
ARPC1A	-1.61573	6.07354	-46.0871	8.87915e-270	1.29928e-268	607.407
GRHL3	2.04383	1.05852	46.0851	9.18896e-270	1.34343e-268	607.373
FAM111B	2.0064	1.26368	46.0785	1.02657e-269	1.49952e-268	607.262
TRIM66	-1.65467	3.10919	-46.0679	1.22797e-269	1.79211e-268	607.083
TUSC3	2.62317	3.72178	46.055	1.52734e-269	2.22705e-268	606.865
FAM219B	-1.65186	4.21728	-46.0544	1.54367e-269	2.24888e-268	606.854
ZMAT3	1.5986	3.8927	46.0534	1.56832e-269	2.28278e-268	606.838
SLC25A12	-0.963836	4.76903	-46.0504	1.6489e-269	2.39795e-268	606.788
SCN3B	-1.88643	2.31067	-46.0454	1.79654e-269	2.61036e-268	606.702
UPF3A	-1.30172	5.71201	-46.0422	1.89343e-269	2.74872e-268	606.65
S100A11	1.7039	9.59394	46.0336	2.19222e-269	3.17968e-268	606.503
PERP	2.15472	6.14933	46.007	3.42883e-269	4.96894e-268	606.056
ADCY3	-2.26813	3.9607	-46.0009	3.80482e-269	5.50898e-268	605.952
PYCR2	-1.2083	5.53528	-45.9928	4.36216e-269	6.31042e-268	605.816
EIF2B4	-1.20001	5.15564	-45.98	5.41565e-269	7.82756e-268	605.599
LUC7L	-2.13231	5.94923	-45.9693	6.48503e-269	9.36499e-268	605.419
GMPPB	-1.51054	4.69018	-45.9634	7.15704e-269	1.03264e-267	605.32
SSR2	-1.27552	6.49498	-45.9606	7.51258e-269	1.08299e-267	605.272
ADGRV1	-2.05373	1.84067	-45.946	9.60095e-269	1.38284e-267	605.027
RPS27A	-1.33309	9.69269	-45.9452	9.73309e-269	1.40065e-267	605.013
TRIM73	-1.20433	0.883289	-45.9122	1.69898e-268	2.4428e-267	604.456
NIPAL3	1.60527	4.83296	45.9042	1.94462e-268	2.79355e-267	604.321
CCDC130	-1.33292	5.64522	-45.8954	2.25803e-268	3.24097e-267	604.172
TGFBR3	-1.7531	3.88072	-45.8807	2.89234e-268	4.14778e-267	603.924
SLC22A31	4.21684	2.61657	45.8804	2.90558e-268	4.16315e-267	603.92
TOMM34	1.27526	5.87356	45.8546	4.49421e-268	6.43377e-267	603.484
MITD1	-1.15913	4.25683	-45.8334	6.43181e-268	9.19961e-267	603.125
TUBGCP6	-1.54108	5.60589	-45.831	6.69155e-268	9.56284e-267	603.086
NFS1	-0.972552	3.68575	-45.8309	6.70913e-268	9.57967e-267	603.083
RILPL1	-1.43663	3.69513	-45.7857	1.43773e-267	2.05109e-266	602.321
SETD4	-1.25595	3.73029	-45.7843	1.47365e-267	2.10052e-266	602.296
ZNF577	-1.80352	3.68837	-45.7834	1.49644e-267	2.13117e-266	602.281
ZNF135	-1.29304	3.56086	-45.7656	2.0205e-267	2.87504e-266	601.981
CYP2E1	-1.90218	1.70492	-45.7628	2.11753e-267	3.01051e-266	601.934
ENOPH1	1.16773	5.63117	45.7547	2.43056e-267	3.45257e-266	601.796
SULT1A3	-1.13496	0.706715	-45.7536	2.47416e-267	3.51147e-266	601.778
FOXP1	-1.33558	3.334	-45.7524	2.52554e-267	3.58132e-266	601.758
RAB25	1.53363	6.71434	45.7512	2.57698e-267	3.65112e-266	601.738
C7	-4.1867	5.67887	-45.7483	2.7069e-267	3.83191e-266	601.688
NEK9	-1.23439	5.17542	-45.7365	3.30584e-267	4.67577e-266	601.489
SNURF	-1.6184	2.14934	-45.736	3.33444e-267	4.71218e-266	601.48
MROH1	-1.57842	6.18768	-45.7319	3.5707e-267	5.04175e-266	601.412
CAMTA2	-1.30982	5.2427	-45.7284	3.78694e-267	5.3425e-266	601.353
MTERF2	-1.60357	4.69973	-45.7174	4.56562e-267	6.43554e-266	601.166
FAXC	1.62885	1.35024	45.7101	5.16096e-267	7.2685e-266	601.043
NPIPA2	-1.21144	0.86501	-45.7018	5.93739e-267	8.35486e-266	600.903
RPS19BP1	-1.52426	6.74515	-45.6869	7.64224e-267	1.07447e-265	600.651
SRSF5	-1.77291	8.14139	-45.6695	1.02546e-266	1.44053e-265	600.357
ITGA2B	-2.04293	2.40884	-45.6521	1.37592e-266	1.9312e-265	600.063
TLCD1	1.52968	3.50906	45.6458	1.53071e-266	2.14664e-265	599.956
TFG	-1.06857	5.40133	-45.6106	2.77288e-266	3.88533e-265	599.362
KIAA0408	-1.31746	0.871099	-45.6049	3.05611e-266	4.27856e-265	599.265
POLE	-1.29898	2.96983	-45.5988	3.38901e-266	4.74059e-265	599.162
TAL1	-1.88875	2.78216	-45.5985	3.40418e-266	4.75778e-265	599.157
OAZ1	-1.10076	8.78938	-45.559	6.64146e-266	9.27444e-265	598.489
SCARF2	-1.91224	4.03344	-45.5565	6.92795e-266	9.66634e-265	598.447
CPLX1	-2.20818	2.75043	-45.5452	8.38123e-266	1.16842e-264	598.256
SNRNP70	-1.92337	8.13078	-45.5306	1.07306e-265	1.49468e-264	598.009
RNF214	-1.30909	4.35443	-45.5249	1.18262e-265	1.64589e-264	597.912
ANKRD35	-1.41785	1.55441	-45.5227	1.22786e-265	1.70741e-264	597.875
TTLL4	-1.04259	2.91844	-45.5209	1.26608e-265	1.75908e-264	597.844
SYNPO2	-2.18276	3.2425	-45.5206	1.27231e-265	1.76626e-264	597.839
ETV4	2.74241	3.64887	45.4682	3.08418e-265	4.27793e-264	596.954
ERLIN1	1.60286	4.99977	45.4592	3.5945e-265	4.98159e-264	596.801
PDE1B	-1.94606	2.74791	-45.4436	4.67732e-265	6.47684e-264	596.537
SEMA6A	-1.49198	2.92077	-45.4339	5.51948e-265	7.6366e-264	596.372
POLN	-0.763373	0.786967	-45.4317	5.72112e-265	7.90894e-264	596.336
AGR2	3.78622	3.25253	45.4257	6.33694e-265	8.75293e-264	596.234
GLI3	-1.46336	2.91574	-45.3995	9.87561e-265	1.36293e-263	595.79
SAFB	-1.02444	6.09752	-45.394	1.08409e-264	1.4949e-263	595.697
DUSP28	-1.08182	2.59433	-45.3921	1.11971e-264	1.54273e-263	595.665
FBXW10	-0.939271	0.748532	-45.3759	1.4711e-264	2.02518e-263	595.392
ASPSCR1	-1.27053	4.22968	-45.3708	1.60451e-264	2.207e-263	595.305
MZT2B	-1.89769	6.82758	-45.3707	1.60869e-264	2.21092e-263	595.302
BCO2	-1.64822	1.85739	-45.3656	1.75418e-264	2.40886e-263	595.216
PAXBP1	-1.61744	4.64805	-45.3397	2.71655e-264	3.7273e-263	594.779
SUN1	-1.46526	5.86712	-45.3151	4.11973e-264	5.64786e-263	594.362
POU6F1	-1.23438	3.8266	-45.3033	5.03852e-264	6.90173e-263	594.161
HSD17B4	-1.57676	6.91773	-45.2845	6.92368e-264	9.47614e-263	593.843
TBC1D8	-1.57718	3.54567	-45.2611	1.02977e-263	1.40823e-262	593.446
CYP4F12	-1.80428	1.34458	-45.259	1.0657e-263	1.45616e-262	593.412
FKBP1B	-1.71242	2.84703	-45.2559	1.12344e-263	1.53379e-262	593.359
HLX	-2.46404	2.99034	-45.2459	1.33183e-263	1.8168e-262	593.189
RASSF1	-1.30417	4.91589	-45.2367	1.55621e-263	2.12112e-262	593.034
MUS81	-1.19187	4.97362	-45.2339	1.63219e-263	2.22285e-262	592.986
CLK4	-1.53021	4.50955	-45.1791	4.12934e-263	5.61903e-262	592.058
HOXB3	-1.69254	1.74517	-45.1739	4.51061e-263	6.1328e-262	591.97
FBLN1	-3.49761	5.69427	-45.1701	4.81333e-263	6.539e-262	591.905
ADH1C	-2.02516	1.49264	-45.1545	6.26328e-263	8.50178e-262	591.641
WNT2B	-1.11487	1.27399	-45.1434	7.56388e-263	1.02588e-261	591.453
KCNK1	1.49376	3.66573	45.1294	9.59594e-263	1.30041e-261	591.215
TTC14	-1.95034	4.85376	-45.1143	1.23852e-262	1.67703e-261	590.96
CCDC152	-1.3009	1.46986	-45.1113	1.30388e-262	1.76408e-261	590.908
CDC42	-1.1291	6.10105	-45.1081	1.37558e-262	1.85957e-261	590.855
ZNF7	-1.11004	3.36297	-45.0901	1.8667e-262	2.52142e-261	590.55
ZFYVE16	-1.42577	3.37496	-45.071	2.58166e-262	3.48429e-261	590.225
CFAP44	-1.68386	2.47979	-45.0453	3.99262e-262	5.38417e-261	589.79
FAM228B	-1.27693	2.55929	-45.0429	4.16272e-262	5.60897e-261	589.748
CHKA	-1.59982	5.32657	-45.0356	4.71049e-262	6.34188e-261	589.624
MIB2	-1.64484	5.03981	-45.0027	8.22451e-262	1.10639e-260	589.067
MDK	3.22301	5.75886	45.0019	8.34396e-262	1.12154e-260	589.053
ATXN7	-1.24911	3.55373	-44.9947	9.42031e-262	1.26519e-260	588.931
TRMT112	1.26759	7.91913	44.9803	1.20226e-261	1.61337e-260	588.687
EDRF1	-1.16383	3.16358	-44.9773	1.26668e-261	1.69844e-260	588.635
ZNF587	-1.42252	3.46163	-44.9734	1.35158e-261	1.81081e-260	588.57
ABCF2	-1.28149	4.24486	-44.9556	1.82805e-261	2.44719e-260	588.268
PPOX	-1.41539	4.43257	-44.9516	1.95877e-261	2.62005e-260	588.199
GOLGA6L9	-1.52504	1.75715	-44.9508	1.98467e-261	2.65255e-260	588.186
ZMYM6	-0.951594	3.10246	-44.9463	2.14389e-261	2.86303e-260	588.109
IDO2	-1.65806	1.20515	-44.9331	2.68072e-261	3.57704e-260	587.886
CENPO	-1.11342	2.6215	-44.9274	2.95266e-261	3.93673e-260	587.789
PCNA	1.2864	6.44896	44.926	3.02564e-261	4.03077e-260	587.765
TCP10L	-1.10123	0.663715	-44.9052	4.30284e-261	5.72763e-260	587.413
SPIN3	-1.00796	2.2171	-44.8876	5.79984e-261	7.71412e-260	587.114
HCN4	1.49547	0.692468	44.8698	7.857e-261	1.04418e-259	586.811
DUS3L	-1.25818	4.64149	-44.8321	1.4885e-260	1.9766e-259	586.172
BEST1	-1.59513	1.99264	-44.8224	1.75698e-260	2.33125e-259	586.006
GDPD5	-1.59393	2.30824	-44.8105	2.14918e-260	2.84934e-259	585.805
SERPINA5	-2.18201	1.61748	-44.7928	2.90282e-260	3.84543e-259	585.504
ANAPC2	-1.10619	5.19685	-44.7912	2.98321e-260	3.94874e-259	585.477
SYCP2	-1.32509	1.68359	-44.791	2.99503e-260	3.96121e-259	585.473
GABRE	-2.837	3.86128	-44.7879	3.1522e-260	4.16575e-259	585.422
ZNF142	-1.06339	3.4973	-44.7877	3.16302e-260	4.17671e-259	585.418
ICAM2	-1.94316	3.94903	-44.7846	3.33912e-260	4.40572e-259	585.364
CYP2D6	-1.87542	2.44059	-44.7803	3.59094e-260	4.73419e-259	585.291
MAU2	-1.28463	5.02461	-44.7695	4.31309e-260	5.68171e-259	585.108
CCNL2	-2.3266	7.06117	-44.7638	4.74993e-260	6.25218e-259	585.012
CENPP	-0.813006	1.05258	-44.7614	4.95239e-260	6.51348e-259	584.97
GDPD3	-2.29706	2.95256	-44.7583	5.22038e-260	6.86048e-259	584.917
SMPD3	-1.68238	1.87358	-44.7541	5.60607e-260	7.36149e-259	584.846
ZNF333	-1.14492	2.75252	-44.7408	7.0193e-260	9.20991e-259	584.621
NBPF26	-1.64165	2.03697	-44.7397	7.15399e-260	9.37917e-259	584.602
SIX5	-1.79737	4.33542	-44.7159	1.07257e-259	1.40507e-258	584.197
TLE1	-1.41149	4.39303	-44.6981	1.45049e-259	1.89864e-258	583.896
VPS18	1.18959	4.83522	44.6838	1.84972e-259	2.4193e-258	583.653
FEN1	1.42417	3.44668	44.6818	1.91276e-259	2.49977e-258	583.619
THPO	-0.956486	0.777413	-44.68	1.97495e-259	2.579e-258	583.587
CCDC88A	-1.12176	2.1857	-44.6745	2.16568e-259	2.82583e-258	583.495
NOX1	0.907598	0.788214	44.6675	2.43896e-259	3.1799e-258	583.376
BTF3	-1.22804	8.54566	-44.6672	2.45375e-259	3.19666e-258	583.37
PRELP	-3.40022	5.30103	-44.6648	2.55431e-259	3.32503e-258	583.33
ARHGAP10	-1.80251	4.07879	-44.6528	3.13458e-259	4.07717e-258	583.125
MFAP4	-3.79759	5.92622	-44.6349	4.24622e-259	5.51875e-258	582.822
HPS4	-1.30493	4.38215	-44.6348	4.25239e-259	5.52242e-258	582.82
UBAP1L	-1.59002	2.48597	-44.6252	5.00875e-259	6.49957e-258	582.657
ZNF598	-1.41012	4.60178	-44.6231	5.18876e-259	6.72786e-258	582.621
TVP23C	-1.11346	2.17734	-44.6141	6.05283e-259	7.84208e-258	582.467
LRRC70	-1.77116	2.03266	-44.6093	6.56048e-259	8.49312e-258	582.387
SOX4	2.22944	5.21664	44.5859	9.76536e-259	1.26322e-257	581.989
DCN	-3.746	5.9497	-44.5821	1.04179e-258	1.34657e-257	581.924
PAFAH1B1	-1.18531	5.6382	-44.5671	1.34441e-258	1.73638e-257	581.67
TMEM234	-1.70246	4.55095	-44.5534	1.70002e-258	2.19394e-257	581.435
PIGP	1.46321	3.25831	44.5493	1.82274e-258	2.35048e-257	581.365
GLRB	1.67025	1.65326	44.5319	2.44702e-258	3.15304e-257	581.071
SH2D6	-1.63658	1.65497	-44.522	2.8993e-258	3.73291e-257	580.901
COQ10A	-1.14804	3.86442	-44.4949	4.59386e-258	5.91008e-257	580.441
PTH1R	-1.97078	2.20583	-44.4925	4.78909e-258	6.15644e-257	580.399
ULK1	-1.32321	5.43894	-44.481	5.82472e-258	7.48193e-257	580.204
SLTM	-1.16943	5.89451	-44.4533	9.31947e-258	1.19617e-256	579.734
UCKL1	-1.19219	5.63165	-44.4401	1.16733e-257	1.49711e-256	579.509
UAP1L1	-1.645	4.52081	-44.4032	2.18791e-257	2.80386e-256	578.881
PNPLA2	-1.75085	6.73666	-44.4029	2.20022e-257	2.81745e-256	578.875
RAD23B	1.5269	6.73473	44.3986	2.3671e-257	3.02878e-256	578.802
UBE2F	-1.27289	4.58087	-44.3932	2.59493e-257	3.31774e-256	578.71
POLR3GL	-1.12939	5.7357	-44.3796	3.26954e-257	4.17701e-256	578.479
PTPRQ	-1.87576	1.47011	-44.3638	4.27775e-257	5.46084e-256	578.21
ZNF852	-1.00418	1.62494	-44.3533	5.11765e-257	6.52797e-256	578.031
TSNAXIP1	-1.58114	1.57303	-44.3408	6.33056e-257	8.0689e-256	577.818
LAMTOR2	1.06225	5.82132	44.3382	6.61315e-257	8.42258e-256	577.775
MAPKAPK3	1.31484	6.42378	44.3362	6.84805e-257	8.71502e-256	577.74
UBE2G2	-1.2012	5.85544	-44.318	9.3305e-257	1.18651e-255	577.431
MCM3AP	-1.704	4.64685	-44.3169	9.50462e-257	1.20772e-255	577.412
TNFRSF14	-2.10924	5.64116	-44.312	1.03386e-256	1.31268e-255	577.328
GOLGA8M	-2.58654	2.9184	-44.304	1.18554e-256	1.50411e-255	577.191
HIC1	-1.94079	2.85473	-44.296	1.35667e-256	1.7199e-255	577.056
PSMA5	1.02192	4.85143	44.2685	2.16855e-256	2.74706e-255	576.587
GFRA1	-1.96537	1.88899	-44.261	2.46449e-256	3.11954e-255	576.46
C19orf71	-2.1792	4.29186	-44.2485	3.0479e-256	3.85507e-255	576.247
LAS1L	-1.01742	4.35215	-44.2367	3.72825e-256	4.71199e-255	576.046
C1orf159	-1.40082	3.17485	-44.2214	4.83577e-256	6.10705e-255	575.786
ARHGAP26	-1.26283	2.80508	-44.2193	5.01096e-256	6.32346e-255	575.75
SLC25A45	-1.69051	3.92849	-44.1892	8.37988e-256	1.05667e-254	575.236
LMOD1	-2.53025	5.27307	-44.1749	1.06771e-255	1.34531e-254	574.994
NPR1	-2.031	4.19081	-44.1456	1.75964e-255	2.21546e-254	574.494
CPSF3	0.958467	4.62288	44.1397	1.94857e-255	2.45145e-254	574.392
POLG	-1.35565	4.50482	-44.1373	2.02781e-255	2.54921e-254	574.352
POP7	1.08574	5.52356	44.1328	2.19179e-255	2.75325e-254	574.275
AKAP17A	-1.43583	6.24223	-44.1311	2.25596e-255	2.8317e-254	574.246
ENY2	-0.89298	4.89016	-44.1279	2.37946e-255	2.98444e-254	574.193
E4F1	-1.38262	5.1651	-44.1255	2.48205e-255	3.11076e-254	574.15
SIDT2	-1.18895	5.25535	-44.0684	6.56824e-255	8.22575e-254	573.177
CACNA1A	-0.83239	0.613337	-44.0533	8.50079e-255	1.06379e-253	572.92
THUMPD2	-1.0807	3.81703	-44.0509	8.84923e-255	1.10656e-253	572.879
DCPS	-1.00466	3.72017	-44.0394	1.07574e-254	1.34415e-253	572.684
EBF2	-1.97343	2.89505	-44.0355	1.15033e-254	1.43626e-253	572.617
SBSPON	-1.63348	2.1177	-44.034	1.181e-254	1.47344e-253	572.591
PFDN2	1.13326	7.0525	43.9958	2.26349e-254	2.82184e-253	571.94
LCN10	-3.41033	2.84055	-43.9911	2.45389e-254	3.0569e-253	571.86
PSMD1	-1.32292	4.99644	-43.9903	2.48892e-254	3.09819e-253	571.846
ZEB2	-1.50144	2.68509	-43.9739	3.29331e-254	4.09641e-253	571.566
LEAP2	-1.43687	2.15382	-43.9708	3.46739e-254	4.3097e-253	571.514
NT5C1B	-0.516502	0.398137	-43.9635	3.93082e-254	4.88202e-253	571.389
MSX1	-1.9228	3.30804	-43.9581	4.30806e-254	5.34653e-253	571.297
ACTR3B	-1.03148	2.82936	-43.9502	4.92963e-254	6.11333e-253	571.162
COQ9	-1.22609	5.73578	-43.9498	4.96295e-254	6.15003e-253	571.156
DNAH1	-1.36501	2.53634	-43.9497	4.97021e-254	6.15441e-253	571.154
ANKS3	-1.40263	3.90905	-43.9283	7.16551e-254	8.86611e-253	570.788
FTH1	-3.1924	8.78094	-43.9061	1.04665e-253	1.29409e-252	570.41
GDF10	-3.063	2.9304	-43.9036	1.09213e-253	1.3493e-252	570.367
POLM	-1.30664	4.89388	-43.8784	1.67933e-253	2.07323e-252	569.937
CEP152	-1.25432	2.02559	-43.868	2.00438e-253	2.47267e-252	569.76
GSTM2	-2.31473	3.49428	-43.8446	2.99096e-253	3.68699e-252	569.36
ARHGEF1	-1.38319	5.68974	-43.8273	4.0158e-253	4.94662e-252	569.065
GTF3C6	1.07868	6.43983	43.812	5.21416e-253	6.41796e-252	568.804
AMPD2	-1.27617	4.24681	-43.8068	5.70321e-253	7.01469e-252	568.715
LPCAT3	-1.76187	3.95223	-43.7924	7.28338e-253	8.95156e-252	568.47
EED	-0.979832	3.54244	-43.7809	8.86423e-253	1.08864e-251	568.274
AFAP1	-1.58908	3.06092	-43.7766	9.54203e-253	1.17101e-251	568.2
GPR182	-1.45405	1.09371	-43.776	9.64074e-253	1.18224e-251	568.19
TREM2	2.93694	2.81215	43.7756	9.71266e-253	1.19018e-251	568.182
ZNF354B	-1.36319	3.64794	-43.766	1.14341e-252	1.40008e-251	568.019
CXXC5	1.38924	5.70725	43.7431	1.69265e-252	2.07109e-251	567.627
SERPINF1	-2.85416	6.53157	-43.7427	1.70405e-252	2.08349e-251	567.62
IL11RA	-1.73786	5.23291	-43.7393	1.80393e-252	2.20397e-251	567.563
RPL21	-1.49649	9.03221	-43.6728	5.623e-252	6.86488e-251	566.427
REXO2	-1.32578	4.97266	-43.6641	6.52617e-252	7.96163e-251	566.278
SHPK	-1.39145	3.15696	-43.6623	6.72491e-252	8.19803e-251	566.248
LYPLA2	1.15094	6.50601	43.6607	6.90939e-252	8.4167e-251	566.221
RCCD1	-1.37837	3.47783	-43.6379	1.02113e-251	1.24298e-250	565.83
ZNF384	-1.70592	4.61145	-43.6331	1.10716e-251	1.3467e-250	565.749
ARHGAP17	-1.21442	4.99604	-43.6321	1.12615e-251	1.3688e-250	565.732
MYL12B	1.13265	9.44491	43.6305	1.15742e-251	1.40576e-250	565.705
CYSLTR2	3.25624	2.09328	43.6275	1.21948e-251	1.48005e-250	565.653
IFITM1	-2.25158	7.04131	-43.6262	1.2473e-251	1.5127e-250	565.63
UIMC1	-0.996946	4.66717	-43.6139	1.53706e-251	1.86276e-250	565.421
ARHGAP21	-1.36079	4.49799	-43.6077	1.71124e-251	2.07233e-250	565.314
TRPM5	-1.67806	1.44285	-43.5882	2.38722e-251	2.88881e-250	564.981
NEDD8	-1.22423	5.18635	-43.588	2.39439e-251	2.89537e-250	564.978
MYH3	-1.82386	2.41535	-43.5764	2.91938e-251	3.52762e-250	564.78
RNASEH2B	-0.967648	3.14601	-43.5748	3.00098e-251	3.62356e-250	564.752
ARRB1	-1.38262	3.07437	-43.573	3.09572e-251	3.73523e-250	564.721
NUMBL	-1.95683	4.40338	-43.5725	3.12384e-251	3.7664e-250	564.712
PRRX1	-2.3669	4.4876	-43.5641	3.60105e-251	4.33861e-250	564.57
TREX2	-1.27753	1.37423	-43.5533	4.33184e-251	5.21527e-250	564.385
MAB21L2	-2.00263	2.05424	-43.552	4.43415e-251	5.33456e-250	564.362
DNM2	-1.01025	5.63307	-43.5493	4.64103e-251	5.57938e-250	564.316
TTC34	-1.4719	1.61079	-43.5444	5.04915e-251	6.06559e-250	564.232
DNM1	-1.92314	2.134	-43.5376	5.6702e-251	6.80672e-250	564.116
TMEM218	-1.15921	3.59404	-43.5358	5.84241e-251	7.00835e-250	564.086
FGFR1	-1.96128	4.56205	-43.483	1.44214e-250	1.72869e-249	563.183
SRRT	-1.0889	6.62557	-43.4683	1.85552e-250	2.22258e-249	562.931
SLC5A6	-1.14542	4.02502	-43.4665	1.91345e-250	2.29031e-249	562.9
IFFO1	-1.76881	3.43264	-43.4617	2.0758e-250	2.48284e-249	562.819
PXN	-1.39497	5.55407	-43.4504	2.51846e-250	3.01012e-249	562.626
PPP2R5D	-1.53687	4.84827	-43.4353	3.26018e-250	3.89382e-249	562.368
NINJ1	1.27074	6.86964	43.4252	3.87455e-250	4.62425e-249	562.195
MTHFD1L	1.41025	3.64875	43.4112	4.92503e-250	5.87374e-249	561.955
SLC9A3	-1.56751	1.43295	-43.4044	5.53386e-250	6.59508e-249	561.839
AP1M2	1.5034	6.92306	43.399	6.07079e-250	7.22976e-249	561.746
KCNIP2	-1.47147	1.84111	-43.3792	8.51261e-250	1.01304e-248	561.408
RYR1	1.97235	1.72064	43.3653	1.07943e-249	1.28365e-248	561.171
CBLB	-1.24126	3.81052	-43.3606	1.17051e-249	1.39096e-248	561.09
NREP	-1.82783	1.58081	-43.3518	1.36161e-249	1.61689e-248	560.938
ANKRD26	-1.02321	2.27484	-43.3262	2.10745e-249	2.50076e-248	560.502
FKBP1A	-1.21044	7.57296	-43.3123	2.67355e-249	3.17023e-248	560.264
SLC9B2	-1.30291	2.00804	-43.2987	3.37559e-249	3.99982e-248	560.031
KLHL29	-1.27379	1.56159	-43.2961	3.52795e-249	4.17736e-248	559.987
DCDC2B	-1.32959	1.43047	-43.2887	4.00903e-249	4.74359e-248	559.859
INHA	-1.7426	2.01705	-43.2851	4.26248e-249	5.03986e-248	559.797
UBE2E1	-1.592	5.0063	-43.2822	4.47933e-249	5.29247e-248	559.748
CRISPLD2	-2.76408	4.70311	-43.2754	5.03249e-249	5.94179e-248	559.631
DHX35	-1.03171	3.71595	-43.275	5.06978e-249	5.98154e-248	559.624
ATXN7L2	-1.45754	3.67001	-43.2726	5.28056e-249	6.22578e-248	559.583
ANKRD29	-1.54558	1.64691	-43.2722	5.31836e-249	6.26587e-248	559.576
MAPK10	-1.23219	2.18759	-43.2632	6.19869e-249	7.29784e-248	559.423
CYP26B1	-2.60337	3.45433	-43.249	7.90608e-249	9.30134e-248	559.18
MCM9	-1.07308	2.9426	-43.2249	1.19456e-248	1.40437e-247	558.767
SMARCC2	-1.77688	6.11642	-43.2057	1.65911e-248	1.94913e-247	558.439
MRPL1	1.06504	4.56242	43.2018	1.77322e-248	2.0817e-247	558.372
CBWD3	-0.531665	0.560977	-43.1986	1.87419e-248	2.19868e-247	558.317
ZGLP1	-2.28111	2.91177	-43.197	1.92537e-248	2.25712e-247	558.29
NAA40	-1.28255	4.92153	-43.1944	2.01421e-248	2.35959e-247	558.245
LRSAM1	-1.08422	4.04786	-43.1919	2.10286e-248	2.46169e-247	558.202
EMC4	-1.13314	5.46593	-43.1425	4.89653e-248	5.72801e-247	557.357
ADAT3	-1.53087	2.23444	-43.1353	5.53953e-248	6.4756e-247	557.233
CPT2	-1.28791	2.91627	-43.1322	5.84406e-248	6.82507e-247	557.18
FNBP4	-1.55758	5.79004	-43.1322	5.84675e-248	6.82507e-247	557.179
INO80E	-1.35386	5.22223	-43.1264	6.45656e-248	7.53158e-247	557.08
FKTN	-1.20679	2.84252	-43.1257	6.53466e-248	7.61731e-247	557.068
PPM1B	-1.03359	4.10488	-43.116	7.72161e-248	8.99456e-247	556.901
SYNM	-1.82829	3.57504	-43.1056	9.21582e-248	1.07275e-246	556.725
SLC1A7	-1.54623	1.1153	-43.0979	1.05258e-247	1.22438e-246	556.592
LPAR1	-1.80319	4.17703	-43.0939	1.12722e-247	1.31028e-246	556.523
TSPAN8	-2.19478	1.95071	-43.0915	1.17386e-247	1.36353e-246	556.483
HDAC4	-1.14702	2.83423	-43.0856	1.29954e-247	1.50845e-246	556.381
LAGE3	1.39385	5.02913	43.0849	1.31481e-247	1.52511e-246	556.369
AKR1E2	-1.40024	1.82555	-43.0845	1.32467e-247	1.53546e-246	556.362
MSL1	-1.38809	5.79686	-43.0837	1.34209e-247	1.55456e-246	556.349
TNFAIP8L3	-1.81577	2.62662	-43.0834	1.34839e-247	1.56077e-246	556.344
BAD	-1.50188	5.41086	-43.0754	1.54746e-247	1.78994e-246	556.206
GSK3A	-0.939303	5.04083	-43.0601	2.00974e-247	2.32303e-246	555.945
STK19	-1.16887	4.26873	-43.0601	2.01249e-247	2.32457e-246	555.944
MCM8	-0.98984	1.73273	-43.0405	2.81293e-247	3.24687e-246	555.609
INPPL1	-1.21074	6.4482	-43.019	4.06509e-247	4.68891e-246	555.241
ZNF600	-1.25432	2.71858	-43.0143	4.4102e-247	5.08343e-246	555.159
CHID1	1.2371	5.40222	43.0077	4.93591e-247	5.68542e-246	555.047
CXCL16	1.54684	5.09352	43.0019	5.45518e-247	6.27916e-246	554.947
TFF2	-2.38381	1.88753	-42.9983	5.80469e-247	6.6768e-246	554.885
RAB8A	-1.11333	3.83319	-42.9941	6.2315e-247	7.16276e-246	554.814
IFT27	-1.33266	3.97193	-42.9845	7.34418e-247	8.43584e-246	554.649
L3MBTL2	-0.94811	4.51932	-42.9845	7.35317e-247	8.4403e-246	554.648
NDUFS6	1.38624	6.59415	42.9841	7.39773e-247	8.48554e-246	554.642
PRPF3	-1.22915	5.29942	-42.9754	8.58946e-247	9.84567e-246	554.493
ZNF419	-1.30012	3.26641	-42.9723	9.05897e-247	1.03766e-245	554.44
MAPK1	1.53215	5.72492	42.9699	9.43962e-247	1.08052e-245	554.399
FGD2	-2.24083	2.88016	-42.9514	1.29513e-246	1.48146e-245	554.082
GBA2	-1.12212	6.12749	-42.9041	2.91826e-246	3.33579e-245	553.27
CDK5RAP1	-0.900359	4.91621	-42.903	2.97434e-246	3.39754e-245	553.251
DDAH1	1.63515	5.54869	42.8755	4.76566e-246	5.43997e-245	552.78
EPB41L2	-1.58428	4.62515	-42.8754	4.76899e-246	5.44001e-245	552.779
JAKMIP3	-1.12467	0.835201	-42.8681	5.41234e-246	6.16962e-245	552.653
PDCL3	1.13798	4.64486	42.8633	5.86873e-246	6.68525e-245	552.572
IGSF1	4.13279	4.00665	42.8499	7.38581e-246	8.40759e-245	552.342
PLCG1	-1.43711	5.74331	-42.8485	7.57309e-246	8.61485e-245	552.317
MRPL17	1.01492	5.7227	42.8468	7.79167e-246	8.85739e-245	552.288
PBX2	-1.31524	6.54901	-42.8462	7.86909e-246	8.93924e-245	552.278
TCF7L1	-2.17688	4.86101	-42.8443	8.13043e-246	9.22977e-245	552.246
HIRA	-1.82008	6.29642	-42.8399	8.76806e-246	9.94677e-245	552.17
PAPSS1	1.35075	5.41859	42.8267	1.09991e-245	1.24692e-244	551.944
FLT4	-2.25769	4.86516	-42.808	1.51594e-245	1.71738e-244	551.623
KDM6A	-1.40297	3.34083	-42.7932	1.95411e-245	2.21224e-244	551.369
PDE8A	-1.21656	4.24302	-42.7929	1.9644e-245	2.22237e-244	551.364
IFITM2	-1.96334	7.61223	-42.7839	2.29301e-245	2.59236e-244	551.209
CP	-2.79298	2.99447	-42.7511	4.02766e-245	4.55035e-244	550.646
ZNF76	-1.13241	5.45498	-42.7418	4.72026e-245	5.32919e-244	550.487
STARD9	-1.66019	2.21227	-42.7414	4.75695e-245	5.36693e-244	550.48
RPL10	-1.35513	10.3085	-42.7053	8.83534e-245	9.96148e-244	549.861
S100A5	2.40391	3.55567	42.6939	1.0756e-244	1.21187e-243	549.664
DDX55	-1.16832	3.83124	-42.665	1.76432e-244	1.98648e-243	549.169
ATG16L2	-1.99705	4.25807	-42.6408	2.67644e-244	3.0114e-243	548.753
CALML6	-1.09524	0.891435	-42.636	2.90592e-244	3.26737e-243	548.67
SERPING1	-2.38306	7.54733	-42.613	4.31206e-244	4.84513e-243	548.276
CHST5	-0.716929	0.500489	-42.591	6.29213e-244	7.06516e-243	547.898
THAP12	-1.03993	4.61649	-42.5883	6.59444e-244	7.39958e-243	547.851
SULT1A1	-2.11541	4.49371	-42.5872	6.714e-244	7.52862e-243	547.833
STEAP2	-1.90313	2.79252	-42.583	7.21984e-244	8.09034e-243	547.761
NUDT1	1.1897	3.13617	42.5666	9.5697e-244	1.07162e-242	547.479
ASB14	-0.65935	0.813724	-42.5618	1.03785e-243	1.16141e-242	547.398
PCF11	-1.25297	4.7065	-42.5595	1.07984e-243	1.20758e-242	547.358
LEMD1	2.40164	2.31484	42.5491	1.29097e-243	1.4427e-242	547.18
BCL6	-1.97957	5.53764	-42.5386	1.54825e-243	1.72906e-242	546.998
RERGL	-2.62163	2.62374	-42.5345	1.66124e-243	1.85398e-242	546.927
ETV5	1.69795	4.61822	42.5245	1.9698e-243	2.19686e-242	546.757
SLC25A27	-2.38893	4.75729	-42.5086	2.58999e-243	2.88659e-242	546.483
TBC1D17	-1.23311	6.21892	-42.4824	4.06114e-243	4.52316e-242	546.034
BRD9	-0.971289	4.26448	-42.482	4.08968e-243	4.55187e-242	546.027
PDLIM2	-1.43066	2.42136	-42.4793	4.28493e-243	4.76598e-242	545.98
NRBP2	-2.13822	5.53224	-42.4787	4.33059e-243	4.81351e-242	545.969
ST14	1.48472	6.78495	42.4785	4.34695e-243	4.82844e-242	545.966
UBA5	-0.978854	4.80543	-42.478	4.38181e-243	4.8639e-242	545.958
GATB	-0.865333	2.96678	-42.4746	4.64367e-243	5.1511e-242	545.9
TCERG1	-1.24536	4.56185	-42.4742	4.68168e-243	5.18978e-242	545.892
MORC2	-1.09682	4.12896	-42.4438	7.88779e-243	8.73798e-242	545.37
TMEM11	0.976741	4.67279	42.4371	8.85374e-243	9.80146e-242	545.255
ZBTB33	1.35426	4.24576	42.4037	1.57275e-242	1.73993e-241	544.68
PDZK1IP1	4.25182	3.1169	42.3404	4.66921e-242	5.16208e-241	543.592
PRDM15	-1.04477	2.33512	-42.3383	4.84038e-242	5.34775e-241	543.556
TMOD1	-2.34125	4.17014	-42.3329	5.30886e-242	5.86141e-241	543.464
CCDC157	-1.1897	2.38453	-42.3233	6.25718e-242	6.90381e-241	543.3
FBXO24	-0.755158	0.696231	-42.3149	7.23983e-242	7.98267e-241	543.154
ORMDL3	1.44176	6.63686	42.3017	9.07226e-242	9.99644e-241	542.928
C9orf16	1.28713	6.08513	42.2914	1.08371e-241	1.19331e-240	542.75
SYNGR2	0.96872	6.43703	42.2822	1.27046e-241	1.39801e-240	542.591
FAM13C	-1.47434	1.94609	-42.2757	1.42046e-241	1.56203e-240	542.48
ADGRL2	-1.95007	4.72516	-42.2612	1.82239e-241	2.00269e-240	542.231
RPP14	-0.913939	2.70159	-42.2598	1.8669e-241	2.05024e-240	542.207
VIP	-1.81899	1.63959	-42.2443	2.43737e-241	2.67495e-240	541.94
NUDT22	-1.24391	4.92906	-42.2425	2.51187e-241	2.75488e-240	541.91
MAT2A	-2.04394	7.91787	-42.2357	2.82627e-241	3.09763e-240	541.792
MSRA	0.943469	3.54741	42.2243	3.43923e-241	3.76695e-240	541.596
SPRY3	-0.707305	1.22874	-42.2196	3.72977e-241	4.08246e-240	541.515
PPIA	-0.972034	7.4757	-42.2175	3.86462e-241	4.22727e-240	541.479
CCDC146	-1.77358	3.96551	-42.2143	4.084e-241	4.46427e-240	541.424
GRIN2C	-3.09793	3.88931	-42.2142	4.09032e-241	4.46822e-240	541.423
POFUT2	-1.33567	4.89278	-42.2095	4.43443e-241	4.84092e-240	541.342
LEMD2	-1.02844	5.38824	-42.2074	4.59546e-241	5.01339e-240	541.306
DEGS1	1.17451	6.7646	42.188	6.42301e-241	7.00253e-240	540.971
CNFN	1.91797	2.52143	42.1839	6.88905e-241	7.50565e-240	540.901
ZNF841	-1.3897	3.6686	-42.1694	8.83751e-241	9.62216e-240	540.652
TMEM139	-2.2491	2.67889	-42.1415	1.42811e-240	1.55388e-239	540.173
TRO	-1.95873	3.75839	-42.1269	1.83772e-240	1.99825e-239	539.92
RBM34	-0.898713	1.41524	-42.1244	1.9187e-240	2.08493e-239	539.877
TK1	1.81842	3.07668	42.101	2.8673e-240	3.11366e-239	539.476
CTSK	-2.57216	4.74223	-42.099	2.96989e-240	3.22294e-239	539.441
TMEM138	-0.931232	4.16491	-42.0798	4.13469e-240	4.48405e-239	539.11
MAPK13	1.45912	5.14919	42.0763	4.38717e-240	4.75474e-239	539.051
ISOC1	1.2985	4.95657	42.0751	4.47759e-240	4.84955e-239	539.03
NR2F2	-1.60508	5.14748	-42.06	5.80978e-240	6.28827e-239	538.77
EXOC1	-1.01192	4.81552	-42.0517	6.7059e-240	7.25345e-239	538.626
STON1	-1.69827	2.74888	-42.0168	1.22297e-239	1.32196e-238	538.026
RAB38	1.63324	3.76414	42.0153	1.25518e-239	1.35589e-238	538
ZNF891	-0.88918	1.50534	-42.0115	1.33849e-239	1.44494e-238	537.935
SLC27A2	1.94279	2.70047	41.9895	1.95736e-239	2.11165e-238	537.555
QRICH2	-1.7858	2.85833	-41.9456	4.16528e-239	4.49067e-238	536.8
SYTL5	3.07508	1.67673	41.9319	5.27735e-239	5.6859e-238	536.564
CARS2	-0.910324	4.32943	-41.9299	5.46106e-239	5.88e-238	536.53
SORBS1	-2.01014	3.13256	-41.928	5.64713e-239	6.07637e-238	536.496
PLD4	1.82874	1.52691	41.9069	8.11513e-239	8.72627e-238	536.134
SPECC1L	-1.00602	4.84501	-41.9068	8.13483e-239	8.74177e-238	536.131
LRRFIP2	-0.933208	4.27811	-41.8831	1.22254e-238	1.3129e-237	535.724
CRBN	-0.967954	4.48727	-41.8631	1.72573e-238	1.85207e-237	535.379
RBM25	-1.35299	5.59272	-41.8611	1.78727e-238	1.91688e-237	535.344
PSMD7	-1.26562	4.99875	-41.8502	2.15467e-238	2.30941e-237	535.157
PHLPP2	-1.20387	3.17723	-41.8301	3.0502e-238	3.26714e-237	534.81
E2F4	-0.949497	6.1433	-41.8271	3.20783e-238	3.43376e-237	534.76
ARGLU1	-1.7813	6.61606	-41.8201	3.62431e-238	3.87705e-237	534.637
MAEA	-1.15399	5.31426	-41.81	4.31107e-238	4.60871e-237	534.464
B4GALNT1	-1.19191	1.18835	-41.7944	5.63682e-238	6.02209e-237	534.196
VPS16	-0.937065	5.43313	-41.7874	6.35822e-238	6.78841e-237	534.076
SUPT7L	-1.06275	5.36626	-41.7807	7.14547e-238	7.62398e-237	533.959
EBLN2	-1.41621	1.83536	-41.7788	7.37947e-238	7.86858e-237	533.927
TLR4	-1.55645	2.93005	-41.7703	8.54489e-238	9.10536e-237	533.78
RPS6KL1	-1.44664	1.91779	-41.7662	9.17224e-238	9.76755e-237	533.709
IPCEF1	-2.65286	3.73605	-41.7601	1.01815e-237	1.08354e-236	533.605
CENPJ	-2.16522	3.86386	-41.7587	1.04351e-237	1.10981e-236	533.58
BDH2	-1.3559	5.98295	-41.7569	1.07731e-237	1.14502e-236	533.548
IL17RC	-1.24517	5.4445	-41.7527	1.15735e-237	1.2293e-236	533.477
ACTG1	1.26425	11.4053	41.7376	1.50218e-237	1.59453e-236	533.216
CLK1	-1.76411	7.13591	-41.7355	1.55612e-237	1.65073e-236	533.181
PLSCR4	-1.64035	5.02002	-41.7247	1.87387e-237	1.98652e-236	532.995
SH2D4A	1.54879	4.6805	41.7204	2.01902e-237	2.13902e-236	532.92
STX18	-0.787875	4.49329	-41.7133	2.28076e-237	2.41476e-236	532.799
ABCC2	-0.748982	0.667153	-41.713	2.29249e-237	2.42563e-236	532.793
CYB5R2	-1.12346	2.42774	-41.7126	2.31137e-237	2.44404e-236	532.785
FAM216A	-0.96956	2.77584	-41.7096	2.43309e-237	2.5711e-236	532.734
GAS1	-2.68304	3.67497	-41.6889	3.47933e-237	3.67434e-236	532.376
C11orf96	-3.16546	5.33586	-41.688	3.53301e-237	3.72864e-236	532.361
ANKDD1A	-1.25673	2.99345	-41.6747	4.44057e-237	4.68346e-236	532.132
OIT3	1.69106	0.939345	41.6661	5.14866e-237	5.42681e-236	531.985
CDH19	-1.33819	0.905861	-41.6657	5.18669e-237	5.4634e-236	531.977
SPTBN2	1.86974	1.50776	41.6428	7.6955e-237	8.10088e-236	531.583
PGGHG	-3.33658	5.88759	-41.6407	7.98696e-237	8.40234e-236	531.546
PSMC5	-1.06302	7.15209	-41.6268	1.01436e-236	1.06644e-235	531.307
SUPT20H	-1.23345	4.4497	-41.5943	1.77719e-236	1.86724e-235	530.746
TIMM23	0.999983	6.46619	41.594	1.78685e-236	1.8762e-235	530.741
PNISR	-1.72148	6.20349	-41.5834	2.14514e-236	2.25096e-235	530.558
CYSTM1	1.24986	6.9271	41.5603	3.1965e-236	3.35206e-235	530.159
SAMM50	-0.989889	4.79701	-41.5548	3.51589e-236	3.68465e-235	530.064
ZNF692	-1.79207	5.15025	-41.5535	3.59242e-236	3.76246e-235	530.042
CAPN10	-1.23126	4.04335	-41.5497	3.83861e-236	4.01776e-235	529.976
TGFBR2	-1.88169	6.82893	-41.5464	4.05837e-236	4.24509e-235	529.92
TMEM175	-1.1587	5.38929	-41.545	4.15704e-236	4.34554e-235	529.896
EFEMP1	-2.5343	6.91589	-41.5272	5.65163e-236	5.90417e-235	529.589
PRPF18	-1.08346	4.23995	-41.5272	5.65556e-236	5.90453e-235	529.589
CD59	-1.51382	7.87155	-41.5079	7.88777e-236	8.22981e-235	529.256
RAP2B	1.13416	3.18367	41.5062	8.1211e-236	8.4679e-235	529.227
STRIP1	-1.08302	4.59745	-41.5056	8.21152e-236	8.55678e-235	529.216
TECTA	-0.795041	1.20902	-41.4977	9.41418e-236	9.80382e-235	529.079
ARHGEF7	-1.2255	4.42032	-41.4858	1.15629e-235	1.20338e-234	528.874
AIFM1	-1.07916	3.87975	-41.4851	1.1694e-235	1.21626e-234	528.862
MPZ	-1.44114	2.54415	-41.4509	2.11054e-235	2.19374e-234	528.272
FXYD2	-0.923644	0.68175	-41.4278	3.14677e-235	3.26876e-234	527.873
ARF6	1.19755	6.05078	41.4137	4.00754e-235	4.16028e-234	527.631
CYP46A1	-1.08121	1.22458	-41.4065	4.54133e-235	4.71145e-234	527.506
RABL2B	-1.29633	4.21752	-41.4064	4.54773e-235	4.71512e-234	527.505
SLC25A10	-1.6334	3.41309	-41.3923	5.80346e-235	6.0133e-234	527.261
MTHFD2	-2.36263	3.56028	-41.3661	9.11629e-235	9.43999e-234	526.809
DNAH17	-0.773943	1.04841	-41.3574	1.06e-234	1.09695e-233	526.659
SCD5	1.94604	5.72882	41.3574	1.06071e-234	1.097e-233	526.658
OPRL1	-0.93972	0.717892	-41.3487	1.2321e-234	1.27345e-233	526.508
EBF3	-1.79509	2.97042	-41.3302	1.69658e-234	1.75242e-233	526.188
KAT8	-0.983422	5.62123	-41.3248	1.86284e-234	1.92296e-233	526.095
WDR97	-1.44611	1.74812	-41.3229	1.92362e-234	1.98445e-233	526.063
ZC3H18	-0.965411	4.813	-41.3064	2.55792e-234	2.63717e-233	525.778
FAM189A2	-2.16545	6.15435	-41.3049	2.62564e-234	2.70529e-233	525.752
PRG2	-1.93369	1.18631	-41.304	2.66622e-234	2.74539e-233	525.736
BMP2K	-1.10735	2.44543	-41.2834	3.80733e-234	3.91794e-233	525.38
RBM33	-1.22982	4.20139	-41.2662	5.1199e-234	5.26537e-233	525.084
EFHC1	-1.34159	3.1326	-41.2611	5.59368e-234	5.74902e-233	524.996
ATXN2L	-1.46878	6.42479	-41.2602	5.6836e-234	5.8378e-233	524.98
ANK2	-1.82615	2.38614	-41.2556	6.15394e-234	6.31697e-233	524.9
KANSL1	-1.12355	4.00665	-41.2538	6.34479e-234	6.50883e-233	524.87
LIG3	-1.00914	3.55585	-41.2492	6.86934e-234	7.04256e-233	524.79
FOXRED1	-0.864738	3.99301	-41.2184	1.17014e-233	1.1989e-232	524.258
TMEM205	-1.36507	6.83067	-41.2037	1.50831e-233	1.54442e-232	524.004
SPNS2	-1.87857	3.89962	-41.2031	1.52267e-233	1.55817e-232	523.995
BBS5	-1.24112	3.99336	-41.2016	1.56319e-233	1.59864e-232	523.968
TECR	-1.18931	6.57169	-41.1846	2.09775e-233	2.14399e-232	523.674
ATP13A5	-0.977275	0.976214	-41.1691	2.73949e-233	2.79814e-232	523.407
CCDC142	-0.973154	2.48496	-41.1646	2.96509e-233	3.02671e-232	523.328
ADPGK	-0.978564	5.39542	-41.164	2.99436e-233	3.05469e-232	523.318
NUP88	-1.12606	4.638	-41.1421	4.36806e-233	4.45332e-232	522.941
ZNF345	-1.04418	2.66006	-41.1419	4.38756e-233	4.47044e-232	522.937
ORAI2	1.15585	4.43035	41.1365	4.81855e-233	4.90654e-232	522.843
NAALAD2	-1.24962	1.23877	-41.1197	6.43486e-233	6.54832e-232	522.554
FAM89B	-1.9113	3.87154	-41.1139	7.11468e-233	7.23567e-232	522.453
TMEM18	-0.949728	4.25437	-41.103	8.59356e-233	8.73431e-232	522.264
ILDR1	1.74518	3.70009	41.1019	8.75148e-233	8.88935e-232	522.246
DHDH	1.7101	1.13452	41.098	9.37426e-233	9.51609e-232	522.178
ITGA1	-1.66467	4.18354	-41.0971	9.51244e-233	9.65042e-232	522.163
TAC1	-2.85253	1.90278	-41.0912	1.05384e-232	1.06847e-231	522.06
EMSY	-1.05288	3.10152	-41.0895	1.08536e-232	1.09975e-231	522.031
SYNGAP1	-1.44788	3.62202	-41.0876	1.12184e-232	1.13602e-231	521.998
ADK	1.14989	4.93005	41.0837	1.20016e-232	1.21459e-231	521.931
SLIT1	3.36204	1.79436	41.0741	1.41575e-232	1.43189e-231	521.765
ANKRD36C	-1.10263	1.16028	-41.0717	1.47524e-232	1.49114e-231	521.724
ACO2	-1.52613	5.33502	-41.0664	1.61879e-232	1.63524e-231	521.631
COPB2	-1.20719	5.72297	-41.0579	1.87483e-232	1.89272e-231	521.485
LTBR	-1.10415	6.45468	-41.0566	1.91594e-232	1.93304e-231	521.463
CLK2	-1.27067	6.00635	-41.0482	2.21407e-232	2.23246e-231	521.318
DPP4	3.03152	2.80187	41.0465	2.28236e-232	2.29992e-231	521.288
ITGA2	2.48122	3.09808	41.0384	2.62442e-232	2.64299e-231	521.148
PPP2R3B	-1.57415	3.35165	-41.0308	2.99293e-232	3.01227e-231	521.017
ARHGEF39	-1.06169	1.15942	-40.9951	5.54513e-232	5.57757e-231	520.4
PSMC3IP	-1.06988	2.36924	-40.9877	6.31019e-232	6.34324e-231	520.271
TMSB10	1.74696	11.3798	40.9775	7.51966e-232	7.55445e-231	520.096
TIAM1	2.32509	2.49022	40.9734	8.07933e-232	8.11176e-231	520.024
GSTM5	-1.88279	1.82709	-40.9669	9.03873e-232	9.0695e-231	519.912
EPHA3	-1.96593	3.48862	-40.9628	9.69748e-232	9.72458e-231	519.842
MLKL	-1.69531	3.47688	-40.9605	1.00962e-231	1.01182e-230	519.801
WIPI1	-1.21282	4.63364	-40.9455	1.30718e-231	1.30925e-230	519.543
CATIP	-1.62945	2.36469	-40.9446	1.32991e-231	1.3312e-230	519.526
RAB5C	-1.03839	6.6872	-40.9418	1.39571e-231	1.39622e-230	519.478
CCDC68	-1.39556	2.0663	-40.9358	1.54743e-231	1.54705e-230	519.374
NDUFS5	1.13257	9.16157	40.9257	1.84324e-231	1.84168e-230	519.2
CXADR	1.68668	4.33951	40.9255	1.848e-231	1.84532e-230	519.197
NEGR1	-1.48978	1.622	-40.922	1.96471e-231	1.96067e-230	519.136
SALL4	-2.09019	2.66315	-40.9141	2.25205e-231	2.24606e-230	518.999
TNS1	-1.49126	6.29697	-40.9021	2.77313e-231	2.76409e-230	518.791
SMIM1	1.65938	4.23537	40.9007	2.83824e-231	2.82728e-230	518.768
AACS	-1.04239	3.44409	-40.8878	3.54998e-231	3.53414e-230	518.544
NLRP1	-1.77771	4.40831	-40.8731	4.57988e-231	4.55669e-230	518.29
FAM133B	-0.978716	3.3612	-40.8676	5.0297e-231	5.00121e-230	518.196
LRRC75A	1.53293	2.90745	40.861	5.64397e-231	5.60863e-230	518.081
ULBP2	1.8737	2.18503	40.8585	5.8928e-231	5.85238e-230	518.038
TMEM45A	-1.81154	2.88072	-40.8473	7.15054e-231	7.09722e-230	517.844
EFS	-1.8311	4.38447	-40.8461	7.29712e-231	7.23835e-230	517.824
ATN1	-1.37083	8.12655	-40.8038	1.51943e-230	1.50629e-229	517.091
WFDC1	-1.97679	1.98053	-40.8036	1.52362e-230	1.50954e-229	517.088
CXXC1	-1.06512	5.85156	-40.7912	1.88668e-230	1.86812e-229	516.874
RASD2	2.28649	2.8225	40.7909	1.89626e-230	1.87648e-229	516.869
ALDH16A1	-1.17423	4.67482	-40.7847	2.11448e-230	2.09117e-229	516.76
SETDB1	-1.23068	4.22658	-40.7829	2.17913e-230	2.15382e-229	516.73
MAMDC4	-2.0123	4.0868	-40.7745	2.51879e-230	2.48804e-229	516.585
STX11	-1.61681	3.40111	-40.774	2.54374e-230	2.51118e-229	516.576
GINS1	0.995002	1.16625	40.7723	2.61895e-230	2.58388e-229	516.546
LTV1	-0.982636	4.91337	-40.7649	2.97433e-230	2.93275e-229	516.419
NHS	-1.38366	1.9999	-40.7609	3.19017e-230	3.1437e-229	516.349
PPP1R13B	-1.24483	5.56625	-40.7398	4.59331e-230	4.5237e-229	515.985
SRRM5	-1.08785	1.33006	-40.7356	4.93934e-230	4.86158e-229	515.912
SNRPA1	-1.01742	4.79192	-40.7341	5.07618e-230	4.99329e-229	515.885
RBM19	-1.23275	4.90245	-40.7323	5.23216e-230	5.14366e-229	515.855
ZDHHC11	-1.56486	1.39017	-40.7252	5.91843e-230	5.81486e-229	515.731
WDR59	-1.06607	4.71571	-40.7174	6.76818e-230	6.64578e-229	515.597
PLAC8L1	-0.908592	0.831022	-40.691	1.07038e-229	1.0504e-228	515.139
TNNT3	-2.13337	1.77771	-40.6861	1.1641e-229	1.14169e-228	515.055
ABCD4	-1.19177	4.9122	-40.6808	1.27513e-229	1.24984e-228	514.964
ASPA	-1.51452	1.56049	-40.6642	1.70238e-229	1.66762e-228	514.675
KCNJ2	2.53809	2.35257	40.6591	1.85711e-229	1.81812e-228	514.588
PHF23	1.01184	5.41228	40.649	2.21343e-229	2.16567e-228	514.413
OVGP1	-1.36701	1.95535	-40.6413	2.52987e-229	2.47381e-228	514.279
AMN	-1.50475	1.32102	-40.6397	2.59816e-229	2.53909e-228	514.252
SLFN11	-1.46177	4.90763	-40.6393	2.61646e-229	2.55546e-228	514.245
UCP2	2.10869	7.06725	40.6281	3.17542e-229	3.09956e-228	514.052
ZNF251	-1.3621	5.07909	-40.6079	4.51149e-229	4.4011e-228	513.701
OSR2	-2.02226	2.00532	-40.5993	5.23676e-229	5.10561e-228	513.552
HAUS3	-0.923204	2.64389	-40.5827	6.976e-229	6.79728e-228	513.265
REN	1.73919	0.852924	40.5689	8.86109e-229	8.62898e-228	513.026
GSTO1	0.920102	7.01804	40.5624	9.90841e-229	9.64317e-228	512.914
ZFPM2	-1.60301	2.59547	-40.5617	1.00285e-228	9.7543e-228	512.902
RALGAPA1	-1.05999	3.1161	-40.5608	1.01891e-228	9.90237e-228	512.886
DOLK	1.22557	4.58275	40.5608	1.01927e-228	9.90237e-228	512.886
CHST2	2.03849	4.98748	40.555	1.12751e-228	1.09474e-227	512.785
GPI	-0.984386	6.37218	-40.5401	1.45852e-228	1.4153e-227	512.528
GRB14	-1.5393	2.93134	-40.5332	1.64363e-228	1.594e-227	512.408
ODAM	-2.27284	2.02028	-40.5302	1.73048e-228	1.67724e-227	512.357
MAP1LC3B2	0.917972	1.13281	40.5231	1.95678e-228	1.89546e-227	512.234
TPM4	-1.68439	6.42489	-40.5118	2.38085e-228	2.30489e-227	512.038
GNRH1	-1.67453	2.43637	-40.5092	2.49045e-228	2.40958e-227	511.993
MCOLN1	-1.03716	4.3983	-40.5052	2.67163e-228	2.58336e-227	511.923
DRAXIN	1.14389	0.571589	40.4955	3.15952e-228	3.05334e-227	511.755
S100A6	2.07006	11.2313	40.4919	3.35969e-228	3.24489e-227	511.694
COLQ	-1.17918	1.88286	-40.4912	3.4017e-228	3.28353e-227	511.681
RNASEH2C	-1.27193	4.83648	-40.4863	3.70485e-228	3.57406e-227	511.596
NSUN6	-1.25965	4.05418	-40.479	4.20704e-228	4.05616e-227	511.469
SIN3B	-1.31411	5.22305	-40.4711	4.82403e-228	4.64831e-227	511.332
UQCRHL	-0.988824	2.12201	-40.468	5.08426e-228	4.89619e-227	511.279
FAHD1	1.0492	4.23301	40.4591	5.93894e-228	5.71593e-227	511.124
CHFR	-0.833025	2.76582	-40.4562	6.2391e-228	6.00132e-227	511.075
PPARG	-1.68453	3.50712	-40.451	6.83081e-228	6.56664e-227	510.984
TVP23A	-0.784724	0.980287	-40.4427	7.88609e-228	7.5767e-227	510.841
TAS2R14	-1.20241	2.2081	-40.441	8.12002e-228	7.79692e-227	510.811
ZDHHC14	-1.07221	2.21805	-40.4396	8.32071e-228	7.98498e-227	510.787
TFF3	-4.8143	8.06148	-40.4377	8.60434e-228	8.25237e-227	510.753
TTBK2	-1.01098	2.48038	-40.4206	1.15585e-227	1.10792e-226	510.458
MFSD8	-1.06143	3.49887	-40.4197	1.17499e-227	1.12562e-226	510.442
GNB3	-1.90558	2.54513	-40.4123	1.33528e-227	1.27843e-226	510.314
IGFBP7	-1.78098	9.62894	-40.4098	1.39502e-227	1.33485e-226	510.27
SETBP1	-1.28687	2.93479	-40.3862	2.09862e-227	2.00694e-226	509.862
SLC43A3	-2.5617	5.57148	-40.3813	2.28449e-227	2.18343e-226	509.777
PAX8	-1.77524	9.31146	-40.369	2.82891e-227	2.7022e-226	509.564
KIZ	-1.39671	4.48731	-40.3642	3.07256e-227	2.93324e-226	509.481
SNRPB2	0.899188	5.47838	40.362	3.19276e-227	3.04622e-226	509.443
ZNF343	-0.960119	3.54769	-40.3537	3.68971e-227	3.51833e-226	509.298
DRC3	-1.48216	3.43719	-40.3458	4.23047e-227	4.03165e-226	509.161
RAPGEF6	-0.835055	2.44369	-40.3417	4.54171e-227	4.32577e-226	509.09
PROSER3	-1.24849	3.14191	-40.3345	5.13989e-227	4.89267e-226	508.967
INPP5E	-1.12419	3.95856	-40.3316	5.40865e-227	5.14554e-226	508.916
CSNK1D	-1.08651	6.28804	-40.3223	6.35376e-227	6.0412e-226	508.755
CBFA2T3	-1.43587	2.28601	-40.322	6.38354e-227	6.06602e-226	508.75
HDAC7	-1.29247	5.99962	-40.3181	6.83117e-227	6.48764e-226	508.682
KCNE2	-0.950723	0.742485	-40.3171	6.95749e-227	6.60381e-226	508.664
C6orf163	-0.831162	1.01409	-40.3119	7.60583e-227	7.21505e-226	508.575
TACSTD2	4.7262	5.42378	40.2923	1.06796e-226	1.0125e-225	508.235
PIEZO1	-1.26329	5.18506	-40.2918	1.07774e-226	1.02119e-225	508.226
HOXA2	-1.05813	1.07065	-40.2906	1.10112e-226	1.04275e-225	508.205
PRRT2	-2.35498	2.8123	-40.2898	1.11594e-226	1.05618e-225	508.192
FAM162B	-1.97035	3.42048	-40.2733	1.48558e-226	1.40521e-225	507.905
ABCC9	-1.64854	2.49782	-40.2712	1.54065e-226	1.45647e-225	507.869
SMPD4	-1.09644	5.36283	-40.2626	1.78945e-226	1.69071e-225	507.719
ACE2	-2.39752	1.70528	-40.2619	1.80979e-226	1.70895e-225	507.708
RAB27A	1.86005	5.33858	40.2567	1.98082e-226	1.86938e-225	507.618
SIM2	-0.696752	0.474041	-40.2544	2.06352e-226	1.94632e-225	507.577
SRP54	-0.964419	5.02644	-40.253	2.11414e-226	1.99291e-225	507.553
PLGRKT	1.18586	5.02539	40.2399	2.64988e-226	2.49651e-225	507.327
PTCD3	-0.891436	4.51419	-40.2352	2.877e-226	2.70894e-225	507.245
CHD8	-1.06077	4.2702	-40.2298	3.15755e-226	2.97141e-225	507.152
ATP13A1	-0.992305	5.80499	-40.2257	3.39267e-226	3.19085e-225	507.08
WDFY2	-0.920975	2.82684	-40.2233	3.53419e-226	3.32206e-225	507.039
SHANK3	-1.93751	5.11035	-40.2053	4.83072e-226	4.53818e-225	506.727
EMC7	0.972475	6.69079	40.1952	5.75685e-226	5.40515e-225	506.551
PGPEP1	0.96432	4.49633	40.1925	6.02843e-226	5.65692e-225	506.505
CSF2	2.04344	0.932365	40.1908	6.21423e-226	5.82796e-225	506.475
CCR6	-0.898591	0.583361	-40.1897	6.33729e-226	5.93999e-225	506.455
KLK10	3.66977	2.00242	40.1842	6.96293e-226	6.52271e-225	506.361
TMEM117	1.1669	2.81165	40.169	9.06344e-226	8.4856e-225	506.098
ABRACL	1.27454	5.58468	40.1433	1.41712e-225	1.32602e-224	505.651
ZNF439	-1.13341	3.34479	-40.1311	1.74883e-225	1.63548e-224	505.44
OLA1	1.08519	4.86289	40.1291	1.81134e-225	1.69298e-224	505.405
PPT1	1.11295	6.61585	40.1193	2.14562e-225	2.00428e-224	505.236
ADIRF	-1.81208	1.05408	-40.119	2.15746e-225	2.0142e-224	505.231
TRIAP1	0.929052	4.9039	40.1071	2.65529e-225	2.47757e-224	505.023
ARL6IP5	1.19168	7.22025	40.1013	2.93268e-225	2.73485e-224	504.924
DSG2	1.85032	5.31645	40.0995	3.02967e-225	2.8237e-224	504.891
IDUA	-1.62156	4.41501	-40.0986	3.07423e-225	2.86361e-224	504.877
LTB4R	-1.63799	3.2982	-40.0904	3.54461e-225	3.29991e-224	504.734
CYTH2	-1.43333	6.10163	-40.0801	4.2381e-225	3.9433e-224	504.556
ETFB	-1.32705	4.20984	-40.0746	4.66225e-225	4.3355e-224	504.46
USHBP1	-1.58921	2.76783	-40.04	8.50445e-225	7.90397e-224	503.859
WDR19	-1.33177	4.7717	-40.0147	1.31911e-224	1.22528e-223	503.42
EFCAB12	-1.44261	1.79505	-39.9999	1.70376e-224	1.58168e-223	503.165
STRA6	2.66211	1.4549	39.9968	1.7988e-224	1.66897e-223	503.11
FAM200B	-1.09763	3.75681	-39.9944	1.87427e-224	1.73801e-223	503.069
RPGR	-1.16815	2.80886	-39.9894	2.04452e-224	1.89483e-223	502.982
ACCS	-1.73949	4.4749	-39.9841	2.24191e-224	2.0766e-223	502.89
DDX39A	-1.05989	5.3873	-39.9731	2.71376e-224	2.51224e-223	502.699
C19orf53	1.04148	7.53246	39.9711	2.80929e-224	2.59922e-223	502.665
RIC3	-1.46731	4.2307	-39.9644	3.15681e-224	2.91912e-223	502.548
RNF181	0.994957	7.01733	39.9638	3.18715e-224	2.94552e-223	502.539
TUBA1B	-1.81832	6.39784	-39.9435	4.53958e-224	4.19308e-223	502.185
GMPPA	-1.05463	5.21165	-39.9395	4.85822e-224	4.48488e-223	502.117
CARMIL3	-0.872545	1.09011	-39.9287	5.86833e-224	5.41435e-223	501.928
HPCAL4	2.6829	1.44015	39.9031	9.1435e-224	8.43143e-223	501.485
BAALC	-1.53281	1.93905	-39.9007	9.54235e-224	8.79431e-223	501.442
PIDD1	-1.52733	4.41309	-39.8953	1.04775e-223	9.65072e-223	501.349
CSNK1A1	-1.47843	5.40495	-39.8902	1.14332e-223	1.05252e-222	501.261
BTNL9	-2.67671	4.43448	-39.8847	1.2579e-223	1.15736e-222	501.166
LEPROTL1	0.971412	4.47228	39.8805	1.35485e-223	1.24586e-222	501.092
PHKG1	-1.23177	1.54022	-39.8759	1.46781e-223	1.34898e-222	501.012
TMEM68	0.87895	2.75089	39.8699	1.62676e-223	1.49423e-222	500.909
ROGDI	-1.46301	3.45462	-39.8655	1.75788e-223	1.61377e-222	500.831
NADSYN1	-1.21494	4.3024	-39.8569	2.0414e-223	1.873e-222	500.682
SNCA	-1.26141	1.9208	-39.8557	2.08221e-223	1.90939e-222	500.662
AP4B1	-1.10737	3.51521	-39.8137	4.32066e-223	3.95984e-222	499.932
OCIAD2	1.15449	6.15828	39.8053	4.99315e-223	4.57364e-222	499.788
CASP4	-1.75582	3.95129	-39.7849	7.12656e-223	6.52418e-222	499.432
MASP2	-1.46345	1.70722	-39.763	1.0408e-222	9.52294e-222	499.053
GJA9	-0.53367	0.33404	-39.7572	1.15217e-222	1.05362e-221	498.952
PVR	-1.13585	4.41976	-39.7534	1.23064e-222	1.12475e-221	498.886
OAZ2	-1.1008	6.31044	-39.7451	1.42085e-222	1.29787e-221	498.742
REV1	-1.26056	4.48653	-39.7359	1.66823e-222	1.523e-221	498.582
MRPS9	-0.813008	4.87264	-39.7326	1.76489e-222	1.61036e-221	498.526
BTNL8	-1.04396	0.83255	-39.7295	1.8645e-222	1.7003e-221	498.471
NNAT	-1.39781	1.64981	-39.7281	1.91077e-222	1.74153e-221	498.446
TPM1	-1.47012	5.32002	-39.7271	1.94256e-222	1.76953e-221	498.43
PPP1R12B	-1.5392	3.43188	-39.7241	2.04721e-222	1.86383e-221	498.377
PHKA2	-1.3298	4.00842	-39.7202	2.191e-222	1.99364e-221	498.309
CLTA	0.952378	7.57867	39.72	2.19798e-222	1.99889e-221	498.306
MAPK8IP2	-0.999019	1.51964	-39.7148	2.40508e-222	2.18603e-221	498.216
ALG12	-1.18952	3.8671	-39.7142	2.43042e-222	2.20784e-221	498.206
FERMT2	-1.27033	5.25591	-39.7071	2.75217e-222	2.49875e-221	498.081
ATP6V1C2	-1.51494	1.88577	-39.6903	3.68004e-222	3.33935e-221	497.791
PROX1	-1.85838	2.90732	-39.6893	3.74379e-222	3.39533e-221	497.774
KCNQ4	-0.894872	1.03628	-39.6826	4.2102e-222	3.81623e-221	497.656
WFS1	-1.55427	6.20448	-39.674	4.88373e-222	4.4243e-221	497.508
CSAD	-1.90864	4.59294	-39.6706	5.18618e-222	4.69573e-221	497.448
POLG2	-1.16328	3.55808	-39.6664	5.57284e-222	5.04305e-221	497.376
NECAB1	-1.28728	1.79329	-39.6555	6.74513e-222	6.10056e-221	497.185
CYB5B	-0.830634	5.54864	-39.6447	8.1285e-222	7.3477e-221	496.999
ZNF83	-1.84326	5.40782	-39.6384	9.06859e-222	8.193e-221	496.889
MAN1A1	-1.64906	5.05172	-39.6305	1.04117e-221	9.4005e-221	496.751
SLC19A1	-1.78221	2.80675	-39.6304	1.04165e-221	9.4005e-221	496.751
NT5C2	-1.8138	5.23466	-39.6124	1.42498e-221	1.28528e-220	496.437
PFN1	0.927602	8.67145	39.6108	1.46577e-221	1.32136e-220	496.409
WDR77	-0.806517	4.48223	-39.5881	2.17487e-221	1.95952e-220	496.015
SCART1	-1.40463	1.70468	-39.5865	2.23542e-221	2.01298e-220	495.987
GDF15	3.44897	4.57592	39.56	3.54097e-221	3.18688e-220	495.528
TIMM29	0.82053	4.34058	39.5439	4.68747e-221	4.21642e-220	495.247
MSN	1.28804	8.22368	39.5344	5.53184e-221	4.97323e-220	495.082
NR2C2	-1.62482	4.67709	-39.5335	5.61733e-221	5.04734e-220	495.066
TUB	-1.67394	4.10658	-39.5216	6.90263e-221	6.19884e-220	494.86
CHERP	-1.22222	4.59764	-39.5057	9.09587e-221	8.16402e-220	494.584
SELENOM	-1.52308	7.16363	-39.501	9.87211e-221	8.85593e-220	494.502
SOD3	-2.55066	7.3604	-39.5007	9.93378e-221	8.90641e-220	494.496
TLR9	-1.22279	0.767385	-39.4742	1.57336e-220	1.40988e-219	494.037
TUT1	-1.09874	4.50658	-39.4648	1.85451e-220	1.66091e-219	493.872
PDZD4	-1.45142	2.36859	-39.459	2.04931e-220	1.83438e-219	493.772
DZIP1L	-1.31697	2.0725	-39.4519	2.31802e-220	2.07378e-219	493.649
DNASE1L1	-1.12364	4.10327	-39.4442	2.65369e-220	2.3728e-219	493.514
THTPA	-1.20054	3.47048	-39.4411	2.79776e-220	2.50026e-219	493.461
PCOLCE2	-2.39896	2.38969	-39.4401	2.84509e-220	2.54119e-219	493.444
BEGAIN	-0.942619	0.913016	-39.4396	2.87011e-220	2.56103e-219	493.436
FAAH	-1.41217	6.37321	-39.4396	2.87041e-220	2.56103e-219	493.435
DDX5	-1.22119	8.64066	-39.426	3.63624e-220	3.24256e-219	493.199
NOP10	0.982415	7.67642	39.4236	3.79363e-220	3.38108e-219	493.157
BANF1	1.13874	7.56783	39.4038	5.35375e-220	4.76897e-219	492.812
FRY	-1.2771	2.79659	-39.4016	5.55702e-220	4.94736e-219	492.775
MRPL4	-0.929218	4.93998	-39.4004	5.67443e-220	5.04917e-219	492.754
NUSAP1	-1.24094	0.870352	-39.3936	6.39589e-220	5.68807e-219	492.635
RNF128	1.75673	5.55081	39.3859	7.30118e-220	6.48967e-219	492.502
VMAC	-1.04976	3.77481	-39.3832	7.65408e-220	6.79969e-219	492.455
FARP2	-0.864112	2.34082	-39.3776	8.44431e-220	7.49767e-219	492.357
OR2A7	-1.57686	2.24242	-39.3666	1.02109e-219	9.06133e-219	492.167
KATNAL2	-1.72209	3.1896	-39.3605	1.13721e-219	1.00864e-218	492.059
PTGES2	-1.04913	5.37718	-39.3461	1.45955e-219	1.29384e-218	491.81
NUDCD1	-0.961046	3.15699	-39.3308	1.90395e-219	1.68688e-218	491.544
OR2A1	-1.02793	0.79016	-39.3057	2.94609e-219	2.60881e-218	491.108
DUS1L	-1.03118	6.01255	-39.3055	2.95692e-219	2.61699e-218	491.104
SNX21	-1.0993	4.31702	-39.2923	3.72163e-219	3.29203e-218	490.874
WNK2	-1.07746	1.35588	-39.2882	3.99754e-219	3.5342e-218	490.802
TTC31	-0.980686	4.51616	-39.2783	4.74238e-219	4.19046e-218	490.632
TBPL1	-0.827322	3.2703	-39.2365	9.81356e-219	8.66681e-218	489.905
PARP2	-1.10072	4.5613	-39.2115	1.5181e-218	1.33999e-217	489.468
PRRT1	-1.66825	2.30798	-39.211	1.53044e-218	1.35016e-217	489.46
SNX8	1.1068	4.19955	39.2077	1.61979e-218	1.42822e-217	489.404
SLC25A34	-1.57379	2.33549	-39.1681	3.22562e-218	2.84261e-217	488.715
DCSTAMP	5.00104	2.33926	39.1571	3.90572e-218	3.44012e-217	488.524
ZFP36L2	-2.05417	7.87616	-39.1161	7.98072e-218	7.02559e-217	487.809
NGRN	-1.56484	5.00305	-39.1043	9.79114e-218	8.61474e-217	487.605
EIF3B	-0.889721	6.20854	-39.1036	9.90905e-218	8.71384e-217	487.593
FOXQ1	3.18653	3.8648	39.0987	1.07921e-217	9.48531e-217	487.508
EBF1	-1.58978	3.27503	-39.0952	1.14785e-217	1.00832e-216	487.446
TF	-1.35119	0.883264	-39.0758	1.60987e-217	1.41343e-216	487.108
MTRF1L	-0.922711	2.83062	-39.0627	2.02094e-217	1.7734e-216	486.881
ATP6V0D1	-1.09526	6.27599	-39.0552	2.30352e-217	2.02029e-216	486.75
TBC1D4	-1.73543	4.77807	-39.0545	2.33013e-217	2.04254e-216	486.738
STX16	-1.31746	6.11811	-39.045	2.7484e-217	2.40791e-216	486.573
ZNF655	-1.11535	5.01115	-39.0427	2.86154e-217	2.50571e-216	486.533
WDR55	-1.05939	4.00766	-39.0423	2.88034e-217	2.52083e-216	486.526
TLL1	-1.23151	1.38878	-39.0335	3.35756e-217	2.93693e-216	486.373
FAF1	0.89816	4.54292	39.02	4.25236e-217	3.71766e-216	486.137
SNUPN	-1.00276	3.93152	-39.007	5.32939e-217	4.6568e-216	485.911
ZBTB48	-1.03756	4.93418	-39.0034	5.66772e-217	4.94981e-216	485.85
C22orf39	-0.99944	4.54839	-38.9995	6.07115e-217	5.29933e-216	485.781
TCEAL2	-2.97477	4.65598	-38.9978	6.25592e-217	5.45773e-216	485.751
PDGFC	1.44052	4.03886	38.9796	8.59013e-217	7.49016e-216	485.434
CPSF7	-1.10604	6.36687	-38.9678	1.05427e-216	9.18788e-216	485.229
HMCES	0.913951	5.66917	38.9579	1.25197e-216	1.0905e-215	485.057
STK25	-1.0083	5.98073	-38.9536	1.35024e-216	1.17548e-215	484.982
LUC7L3	-1.41602	6.55906	-38.9518	1.39192e-216	1.21113e-215	484.951
ADCY6	-1.45112	4.78409	-38.9513	1.40599e-216	1.22273e-215	484.941
SNRPD3	-1.12396	5.95493	-38.9456	1.55125e-216	1.34834e-215	484.843
KCNJ8	-1.75599	4.16964	-38.9441	1.5935e-216	1.38433e-215	484.816
COLEC12	-2.30541	3.25825	-38.942	1.65194e-216	1.43435e-215	484.78
CMTM6	1.27038	6.18892	38.9159	2.60091e-216	2.25713e-215	484.326
LMLN	-1.05095	2.92433	-38.915	2.64314e-216	2.29257e-215	484.31
MIS18A	1.02832	3.36876	38.9036	3.22201e-216	2.79319e-215	484.112
ADM5	-1.7587	1.80816	-38.9023	3.29656e-216	2.85633e-215	484.09
FKBP11	-1.55498	3.85784	-38.9013	3.35443e-216	2.90494e-215	484.072
RNF135	0.900135	4.96427	38.9012	3.35815e-216	2.90664e-215	484.071
CCND2	1.45255	6.24958	38.9007	3.38751e-216	2.93052e-215	484.062
RFNG	-1.15154	5.77127	-38.8926	3.90485e-216	3.3763e-215	483.92
HAP1	-1.9141	1.99075	-38.8911	4.0082e-216	3.46384e-215	483.894
PLCD3	2.37186	4.26546	38.8841	4.52336e-216	3.90699e-215	483.773
POC1A	0.918751	2.0897	38.8778	5.0544e-216	4.36338e-215	483.662
ACADL	-1.99397	4.92915	-38.8706	5.73086e-216	4.94478e-215	483.537
EXOSC5	1.07129	4.84431	38.87	5.78363e-216	4.9877e-215	483.528
YBX2	-1.75845	2.26233	-38.868	5.99601e-216	5.16815e-215	483.491
ZSCAN21	-0.934547	3.22221	-38.865	6.31773e-216	5.44261e-215	483.439
CYGB	-1.95698	5.31296	-38.8644	6.37674e-216	5.49058e-215	483.43
FASTKD2	-0.872149	4.22086	-38.8579	7.14565e-216	6.14943e-215	483.316
SCN7A	-1.4341	1.19257	-38.8399	9.77258e-216	8.40575e-215	483.003
PMVK	1.2663	6.73	38.8385	1.00215e-215	8.61533e-215	482.978
PDE2A	-1.83068	3.91782	-38.8351	1.0626e-215	9.13026e-215	482.919
ZRANB1	-1.39787	3.89654	-38.835	1.06452e-215	9.142e-215	482.918
LRP1B	-1.81017	1.73192	-38.8199	1.38529e-215	1.18906e-214	482.654
PFKL	-1.07812	6.50668	-38.8159	1.48389e-215	1.27303e-214	482.586
RBM44	-0.705996	0.635266	-38.814	1.53562e-215	1.31673e-214	482.551
ABI3BP	-2.33756	4.23674	-38.8085	1.68886e-215	1.44737e-214	482.456
MOCS1	-1.20338	4.68795	-38.8082	1.69809e-215	1.45453e-214	482.451
RUBCN	-1.44976	2.92355	-38.7994	1.97749e-215	1.69297e-214	482.299
DIRAS3	2.59913	3.556	38.799	1.99328e-215	1.7056e-214	482.291
C2CD2L	-0.929238	3.28099	-38.7941	2.16969e-215	1.85559e-214	482.206
MTMR2	-0.901536	3.45573	-38.7826	2.65018e-215	2.26535e-214	482.006
C5orf63	-0.950432	1.98261	-38.7803	2.76119e-215	2.35901e-214	481.965
TRPT1	-1.01205	5.82689	-38.7734	3.11095e-215	2.65646e-214	481.846
CBX4	1.16243	4.76598	38.7491	4.75151e-215	4.05524e-214	481.422
JAKMIP1	-0.805056	0.552044	-38.7285	6.80657e-215	5.80616e-214	481.063
PELI2	-1.25785	2.81816	-38.7217	7.65549e-215	6.52694e-214	480.945
ZCRB1	-0.948848	4.71382	-38.717	8.30898e-215	7.08044e-214	480.863
CDKN2B	1.68313	2.08825	38.704	1.04242e-214	8.87831e-214	480.637
ADD1	-1.00917	6.62438	-38.6992	1.13439e-214	9.65661e-214	480.552
DDR2	-1.87491	3.78245	-38.6989	1.14001e-214	9.69947e-214	480.547
RASSF9	-1.45509	2.0603	-38.695	1.22002e-214	1.03749e-213	480.479
PPP2R3C	-0.858027	3.47375	-38.691	1.30757e-214	1.11137e-213	480.41
ZNF284	-0.879988	2.07244	-38.6764	1.68674e-214	1.43291e-213	480.156
SEZ6L2	2.67359	2.66153	38.6651	2.05395e-214	1.74396e-213	479.959
HIGD1A	-1.12382	6.41409	-38.6614	2.19165e-214	1.85991e-213	479.894
TMEM249	-0.825778	0.515786	-38.6551	2.4432e-214	2.07232e-213	479.785
PDE7A	-1.51377	4.1573	-38.6493	2.70178e-214	2.29048e-213	479.685
SBF1	-1.32114	6.49668	-38.633	3.59233e-214	3.04389e-213	479.4
BBIP1	-1.01775	3.49214	-38.6319	3.66288e-214	3.10208e-213	479.38
MAPRE3	-1.20393	4.96727	-38.6296	3.80998e-214	3.225e-213	479.341
CHD3	-1.13689	6.18384	-38.6266	4.01353e-214	3.39556e-213	479.289
PLXNB3	-1.23909	1.19911	-38.6265	4.02481e-214	3.40335e-213	479.286
EIF4A3	-0.990777	5.87767	-38.6225	4.31486e-214	3.64675e-213	479.217
COPS7B	-1.02621	4.96313	-38.6096	5.40001e-214	4.56154e-213	478.992
NCKAP5L	-1.14531	4.33268	-38.6072	5.6301e-214	4.75347e-213	478.951
DTX3	-1.20773	5.75362	-38.5874	7.94483e-214	6.70436e-213	478.606
MEGF6	-1.86119	3.70006	-38.586	8.14763e-214	6.87199e-213	478.581
WFIKKN1	-1.73944	1.47685	-38.5818	8.76696e-214	7.39058e-213	478.508
IL17D	-1.41773	2.44483	-38.5813	8.84623e-214	7.45359e-213	478.499
TNFRSF10C	1.724	2.56206	38.5586	1.31333e-213	1.10602e-212	478.104
UBL4A	0.976129	5.60697	38.5465	1.62283e-213	1.36596e-212	477.892
SLC12A4	-1.20114	5.78699	-38.5423	1.74383e-213	1.46705e-212	477.821
BLOC1S4	0.95453	4.6334	38.533	2.05155e-213	1.72506e-212	477.658
TRMT10B	-1.04323	3.99664	-38.5275	2.25845e-213	1.89807e-212	477.562
RSRC2	-0.979984	5.52562	-38.5169	2.71447e-213	2.28015e-212	477.378
GTPBP3	-0.954458	3.80008	-38.4978	3.79056e-213	3.18245e-212	477.044
PRR36	1.95447	2.53574	38.4962	3.89985e-213	3.27254e-212	477.016
REXO1	-1.01744	4.35349	-38.4921	4.18695e-213	3.51167e-212	476.945
C1QTNF3	-1.59502	2.15176	-38.4696	6.19204e-213	5.19075e-212	476.554
HID1	-1.27526	4.65406	-38.4667	6.52048e-213	5.4633e-212	476.502
B3GNT3	3.77564	2.19483	38.4652	6.69227e-213	5.60439e-212	476.476
RPL36AL	1.16618	9.07515	38.4578	7.61242e-213	6.37174e-212	476.347
CYP2S1	2.6449	2.20224	38.4526	8.32952e-213	6.96843e-212	476.257
BMP5	-1.30529	1.1091	-38.4484	8.965e-213	7.49627e-212	476.184
ANKRD18A	-1.38765	1.83066	-38.4378	1.0791e-212	9.01858e-212	475.998
SNTG2	-0.794048	0.779037	-38.4356	1.12141e-212	9.36744e-212	475.96
OSTF1	0.86405	6.2978	38.4281	1.2777e-212	1.06675e-211	475.83
AP2A2	-0.822311	4.85634	-38.4272	1.29789e-212	1.08307e-211	475.814
PIWIL4	-0.86082	1.61572	-38.4096	1.76427e-212	1.4715e-211	475.507
BRAT1	-1.04126	5.40922	-38.3925	2.37709e-212	1.98163e-211	475.209
C1orf43	0.979256	7.39763	38.3906	2.45437e-212	2.04502e-211	475.177
RBP5	-1.92744	3.02985	-38.3841	2.74972e-212	2.28995e-211	475.063
RAD9A	-1.24859	4.20554	-38.3774	3.08901e-212	2.57121e-211	474.947
FASTK	-0.931749	6.32379	-38.3683	3.62606e-212	3.01672e-211	474.787
THAP8	1.04887	3.38922	38.3676	3.66591e-212	3.04834e-211	474.776
GTF2H5	0.903856	3.4527	38.3351	6.46973e-212	5.37711e-211	474.208
LRGUK	-0.817295	0.90462	-38.3293	7.1531e-212	5.94208e-211	474.108
EPHX4	1.65191	2.13654	38.3224	8.06272e-212	6.69433e-211	473.988
MDM4	-1.12073	4.2583	-38.3097	1.00742e-211	8.36022e-211	473.765
SCARF1	-1.51605	5.18019	-38.308	1.03605e-211	8.59352e-211	473.737
TMEM42	-1.14954	5.28008	-38.2954	1.29117e-211	1.07042e-210	473.517
EIF2D	-0.941686	5.37055	-38.2744	1.86464e-211	1.54506e-210	473.15
PPP1R12A	-1.16571	4.87374	-38.2602	2.38843e-211	1.9781e-210	472.902
GOLGA1	-0.912496	4.17912	-38.2594	2.41971e-211	2.00299e-210	472.889
DNAJB7	-0.565434	0.511342	-38.2416	3.29937e-211	2.72979e-210	472.579
RUSC2	-1.07571	4.93708	-38.2338	3.78062e-211	3.1264e-210	472.443
GLI1	-1.83296	1.46649	-38.2332	3.82483e-211	3.16137e-210	472.432
RASL11B	-1.37574	0.908442	-38.2326	3.86335e-211	3.19161e-210	472.422
[truncated: 13,395 more rows]

## Sheet: GO,KEGG
Table S2. Differential genes and Functional enrichment analysis
ID	description	GeneRatio	BgRatio	pValue	FDR	qvalue	geneID	size	DB	enrichmentRatio	rep("Up", nrow(up.result$Enrich_tab))
hsa04115	hsa04115	p53 signaling pathway	11/256	73/8093	1.60202e-05	0.00397278	0.00360452	BBC3/BID/ZMAT3/DDB2/CCND1/CCND2/CDKN2A/SFN/CDKN1A/PERP/PMAIP1	11	pathway_KEGG	0.0429688	Up
hsa05222	hsa05222	Small cell lung cancer	12/256	92/8093	2.96476e-05	0.00397278	0.00360452	RXRG/E2F1/CDKN2B/DDB2/CCND1/FN1/LAMB3/ITGA2/ITGA3/CKS2/CDKN1A/BIRC7	12	pathway_KEGG	0.046875	Up
hsa04512	hsa04512	ECM-receptor interaction	11/256	88/8093	9.47476e-05	0.00779513	0.00707257	FN1/LAMB3/SDC4/ITGA2/ITGA3/CD44/COMP/ITGB4/TNC/COL1A1/SPP1	11	pathway_KEGG	0.0429688	Up
hsa05202	hsa05202	Transcriptional misregulation in cancer	17/256	192/8093	0.000116345	0.00779513	0.00707257	ETV4/RXRG/HMGA2/DDB2/ETV5/SPINT1/DUSP6/RUNX1/CSF2/MET/BAIAP3/PLAU/CCND2/CDKN1A/SSX1/RUNX2/CCNA1	17	pathway_KEGG	0.0664062	Up
hsa04514	hsa04514	Cell adhesion molecules	14/256	149/8093	0.00025222	0.013519	0.0122659	CDH3/CLDN16/NRCAM/CLDN1/SDC4/CLDN9/CLDN10/SDC3/CDH4/CDH2/ICAM1/CLDN2/VTCN1/HLA-G	14	pathway_KEGG	0.0546875	Up
hsa04060	hsa04060	Cytokine-cytokine receptor interaction	20/256	295/8093	0.0010449	0.0466722	0.0423459	GDF15/TNFRSF10C/TGFB1/CSF2/CX3CL1/TNFRSF12A/EDA2R/IL1RAP/CXCL17/TGFBR1/TNFSF15/TNFRSF21/EBI3/CRLF2/CCL13/CCL20/INHBB/CCL17/CCL18/CXCL14	20	pathway_KEGG	0.078125	Up
hsa04974	hsa04974	Protein digestion and absorption	10/256	103/8093	0.00149422	0.0572074	0.0519046	DPP4/COL13A1/KCNN4/PRSS2/COL8A1/SLC1A5/PRSS1/COL1A1/COL8A2/COL10A1	10	pathway_KEGG	0.0390625	Up
hsa05223	hsa05223	Non-small cell lung cancer	8/256	72/8093	0.0018668	0.0589363	0.0534732	RXRG/E2F1/DDB2/TGFA/CCND1/MET/CDKN2A/CDKN1A	8	pathway_KEGG	0.03125	Up
hsa05205	hsa05205	Proteoglycans in cancer	15/256	205/8093	0.00210453	0.0589363	0.0534732	TGFB1/TIAM1/CCND1/FN1/SDC4/MET/ITGA2/PLAU/WNT3/CDKN1A/CD44/PLAUR/WNT10A/ERBB3/COL1A1	15	pathway_KEGG	0.0585938	Up
hsa05226	hsa05226	Gastric cancer	12/256	149/8093	0.00263437	0.0589363	0.0534732	RXRG/E2F1/CDKN2B/DDB2/TGFB1/CCND1/MET/FGF1/WNT3/CDKN1A/TGFBR1/WNT10A	12	pathway_KEGG	0.046875	Up
hsa05212	hsa05212	Pancreatic cancer	8/256	76/8093	0.00263894	0.0589363	0.0534732	E2F1/DDB2/TGFA/TGFB1/CCND1/CDKN2A/CDKN1A/TGFBR1	8	pathway_KEGG	0.03125	Up
hsa05220	hsa05220	Chronic myeloid leukemia	8/256	76/8093	0.00263894	0.0589363	0.0534732	E2F1/DDB2/TGFB1/CCND1/RUNX1/CDKN2A/CDKN1A/TGFBR1	8	pathway_KEGG	0.03125	Up
hsa05165	hsa05165	Human papillomavirus infection	20/256	331/8093	0.00405232	0.0835401	0.0757964	E2F1/HEY2/CCND1/FN1/LAMB3/HES6/ITGA2/CCND2/ITGA3/WNT3/HES4/CDKN1A/COMP/ITGB4/CCNA1/WNT10A/TNC/COL1A1/HLA-G/SPP1	20	pathway_KEGG	0.078125	Up
hsa05210	hsa05210	Colorectal cancer	8/256	86/8093	0.00566807	0.108503	0.0984454	BBC3/DDB2/TGFA/TGFB1/CCND1/CDKN1A/TGFBR1/PMAIP1	8	pathway_KEGG	0.03125	Up
hsa05218	hsa05218	Melanoma	7/256	72/8093	0.00746209	0.133323	0.120964	E2F1/DDB2/CCND1/MET/FGF1/CDKN2A/CDKN1A	7	pathway_KEGG	0.0273438	Up
hsa00240	hsa00240	Pyrimidine metabolism	6/256	56/8093	0.00816012	0.136682	0.124012	ENTPD1/CDA/UPP1/TK1/ENTPD8/PNP	6	pathway_KEGG	0.0234375	Up
hsa05219	hsa05219	Bladder cancer	5/256	41/8093	0.00900127	0.141902	0.128749	E2F1/CCND1/CDKN2A/CDKN1A/DAPK2	5	pathway_KEGG	0.0195312	Up
hsa05166	hsa05166	Human T-cell leukemia virus 1 infection	14/256	222/8093	0.010699	0.155689	0.141258	E2F1/CDKN2B/TGFB1/CCND1/CSF2/CCND2/CDKN2A/CDKN1A/ICAM1/TGFBR1/ADCY8/CCNA1/MMP7/HLA-G	14	pathway_KEGG	0.0546875	Up
hsa04510	hsa04510	Focal adhesion	13/256	201/8093	0.0112364	0.155689	0.141258	CCND1/FN1/LAMB3/MET/ITGA2/CCND2/ITGA3/RASGRF1/COMP/ITGB4/TNC/COL1A1/SPP1	13	pathway_KEGG	0.0507812	Up
hsa04080	hsa04080	Neuroactive ligand-receptor interaction	19/256	341/8093	0.0116186	0.155689	0.141258	ADORA1/GABRB2/ADRA1B/GABRD/GLRB/HRH1/UCN/ADM/CYSLTR2/NMU/PRSS2/F2R/APLN/SSTR3/GABBR2/APLNR/NPW/GRM4/PRSS1	19	pathway_KEGG	0.0742188	Up
hsa04933	hsa04933	AGE-RAGE signaling pathway in diabetic complications	8/256	100/8093	0.013645	0.174136	0.157995	PLCD3/TGFB1/NOX4/CCND1/FN1/ICAM1/TGFBR1/COL1A1	8	pathway_KEGG	0.03125	Up
hsa05225	hsa05225	Hepatocellular carcinoma	11/256	168/8093	0.0174368	0.195334	0.177228	E2F1/DDB2/TGFA/TGFB1/CCND1/MET/WNT3/CDKN2A/CDKN1A/TGFBR1/WNT10A	11	pathway_KEGG	0.0429688	Up
hsa04215	hsa04215	Apoptosis - multiple species	4/256	32/8093	0.0175309	0.195334	0.177228	BBC3/BID/BIRC7/PMAIP1	4	pathway_KEGG	0.015625	Up
hsa04610	hsa04610	Complement and coagulation cascades	7/256	85/8093	0.0177198	0.195334	0.177228	PROS1/SERPINA1/CFI/PLAU/F2R/CD55/PLAUR	7	pathway_KEGG	0.0273438	Up
hsa04110	hsa04110	Cell cycle	9/256	126/8093	0.0182215	0.195334	0.177228	E2F1/CDKN2B/TGFB1/CCND1/CCND2/CDKN2A/SFN/CDKN1A/CCNA1	9	pathway_KEGG	0.0351562	Up
hsa04218	hsa04218	Cellular senescence	10/256	156/8093	0.0260166	0.262825	0.238462	E2F1/CDKN2B/TGFB1/CCND1/CCND2/CDKN2A/CDKN1A/TGFBR1/CCNA1/HLA-G	10	pathway_KEGG	0.0390625	Up
hsa05169	hsa05169	Epstein-Barr virus infection	12/256	202/8093	0.0264786	0.262825	0.238462	E2F1/ENTPD1/BID/DDB2/CCND1/CCND2/ENTPD8/CDKN1A/ICAM1/CD44/CCNA1/HLA-G	12	pathway_KEGG	0.046875	Up
hsa05216	hsa05216	Thyroid cancer	4/256	37/8093	0.0284957	0.268332	0.243459	RXRG/DDB2/CCND1/CDKN1A	4	pathway_KEGG	0.015625	Up
hsa00340	hsa00340	Histidine metabolism	3/256	22/8093	0.0308955	0.268332	0.243459	ALDH3B1/CARNS1/AOC1	3	pathway_KEGG	0.0117188	Up
hsa05214	hsa05214	Glioma	6/256	75/8093	0.0309061	0.268332	0.243459	E2F1/DDB2/TGFA/CCND1/CDKN2A/CDKN1A	6	pathway_KEGG	0.0234375	Up
hsa04151	hsa04151	PI3K-Akt signaling pathway	18/256	354/8093	0.0314877	0.268332	0.243459	LPAR5/TGFA/CCND1/FN1/LAMB3/MET/ITGA2/CCND2/ITGA3/FGF1/CDKN1A/COMP/F2R/ITGB4/TNC/ERBB3/COL1A1/SPP1	18	pathway_KEGG	0.0703125	Up
hsa05414	hsa05414	Dilated cardiomyopathy	7/256	96/8093	0.0320397	0.268332	0.243459	TGFB1/ITGA2/ITGA3/CACNB1/CACNG4/ADCY8/ITGB4	7	pathway_KEGG	0.0273438	Up
hsa05215	hsa05215	Prostate cancer	7/256	97/8093	0.0336384	0.272443	0.247189	E2F1/TGFA/ETV5/SPINT1/CCND1/PLAU/CDKN1A	7	pathway_KEGG	0.0273438	Up
hsa05412	hsa05412	Arrhythmogenic right ventricular cardiomyopathy	6/256	77/8093	0.0345637	0.272443	0.247189	ITGA2/ITGA3/CDH2/CACNB1/CACNG4/ITGB4	6	pathway_KEGG	0.0234375	Up
hsa04061	hsa04061	Viral protein interaction with cytokine and cytokine receptor	7/256	100/8093	0.0387509	0.296721	0.269217	TNFRSF10C/CX3CL1/CCL13/CCL20/CCL17/CCL18/CXCL14	7	pathway_KEGG	0.0273438	Up
hsa05416	hsa05416	Viral myocarditis	5/256	60/8093	0.0405668	0.301997	0.274004	BID/CCND1/ICAM1/CD55/HLA-G	5	pathway_KEGG	0.0195312	Up
hsa05224	hsa05224	Breast cancer	9/256	147/8093	0.0432998	0.313631	0.284559	E2F1/DDB2/JAG2/HEY2/CCND1/FGF1/WNT3/CDKN1A/WNT10A	9	pathway_KEGG	0.0351562	Up
hsa04928	hsa04928	Parathyroid hormone synthesis, secretion and action	7/256	106/8093	0.0504432	0.355757	0.322781	RXRG/SLC34A2/CDKN1A/KL/MMP16/RUNX2/ADCY8	7	pathway_KEGG	0.0273438	Up
hsa00230	hsa00230	Purine metabolism	8/256	130/8093	0.0536291	0.368528	0.334368	ENTPD1/AK1/PDE9A/ENTPD8/PDE5A/ADCY8/ENTPD2/PNP	8	pathway_KEGG	0.03125	Up
hsa05221	hsa05221	Acute myeloid leukemia	5/256	67/8093	0.060224	0.388816	0.352775	DUSP6/CCND1/RUNX1/CSF2/CCNA1	5	pathway_KEGG	0.0195312	Up
hsa04390	hsa04390	Hippo signaling pathway	9/256	157/8093	0.0609338	0.388816	0.352775	BBC3/TGFB1/CCND1/DLG4/CCND2/FGF1/WNT3/TGFBR1/WNT10A	9	pathway_KEGG	0.0351562	Up
hsa05160	hsa05160	Hepatitis C	9/256	157/8093	0.0609338	0.388816	0.352775	E2F1/BID/CLDN16/CLDN1/CCND1/CLDN9/CLDN10/CDKN1A/CLDN2	9	pathway_KEGG	0.0351562	Up
hsa04360	hsa04360	Axon guidance	10/256	182/8093	0.062875	0.391872	0.355548	NGEF/UNC5B/EPHB3/SEMA6B/SEMA3F/SLIT1/MET/PLXNC1/TRPC5/PLXNA4	10	pathway_KEGG	0.0390625	Up
hsa05410	hsa05410	Hypertrophic cardiomyopathy	6/256	90/8093	0.0650646	0.395584	0.358915	TGFB1/ITGA2/ITGA3/CACNB1/CACNG4/ITGB4	6	pathway_KEGG	0.0234375	Up
hsa05206	hsa05206	MicroRNAs in cancer	15/256	310/8093	0.066654	0.395584	0.358915	E2F1/HMGA2/CCND1/MET/PLAU/CCND2/SOX4/WNT3/CDKN2A/CDKN1A/CD44/MMP16/CYP1B1/TNC/ERBB3	15	pathway_KEGG	0.0585938	Up
hsa00533	hsa00533	Glycosaminoglycan biosynthesis - keratan sulfate	2/256	14/8093	0.0706372	0.395584	0.358915	B3GNT7/CHST2	2	pathway_KEGG	0.0078125	Up
hsa04979	hsa04979	Cholesterol metabolism	4/256	50/8093	0.0725883	0.395584	0.358915	NPC2/LPL/APOE/APOC1	4	pathway_KEGG	0.015625	Up
hsa05144	hsa05144	Malaria	4/256	50/8093	0.0725883	0.395584	0.358915	TGFB1/MET/ICAM1/COMP	4	pathway_KEGG	0.015625	Up
hsa04710	hsa04710	Circadian rhythm	3/256	31/8093	0.0734177	0.395584	0.358915	NR1D1/BHLHE40/ARNTL	3	pathway_KEGG	0.0117188	Up
hsa04970	hsa04970	Salivary secretion	6/256	93/8093	0.0738029	0.395584	0.358915	ADRA1B/KCNN4/CST5/ADCY8/CST2/AQP5	6	pathway_KEGG	0.0234375	Up
hsa00604	hsa00604	Glycosphingolipid biosynthesis - ganglio series	2/256	15/8093	0.0798529	0.412819	0.374553	ST3GAL5/ST6GALNAC5	2	pathway_KEGG	0.0078125	Up
hsa01524	hsa01524	Platinum drug resistance	5/256	73/8093	0.0807047	0.412819	0.374553	BBC3/BID/CDKN2A/CDKN1A/PMAIP1	5	pathway_KEGG	0.0195312	Up
hsa04010	hsa04010	MAPK signaling pathway	14/256	294/8093	0.0826946	0.412819	0.374553	MAP3K6/DUSP4/TGFA/TGFB1/DUSP6/MET/RASGRF1/FGF1/IL1RAP/TGFBR1/CACNB1/DUSP5/CACNG4/ERBB3	14	pathway_KEGG	0.0546875	Up
hsa05150	hsa05150	Staphylococcus aureus infection	6/256	96/8093	0.0831799	0.412819	0.374553	KRT15/CFI/ICAM1/KRT27/KRT19/KRT17	6	pathway_KEGG	0.0234375	Up
hsa04530	hsa04530	Tight junction	9/256	169/8093	0.0874459	0.422136	0.383006	CLDN16/TIAM1/CLDN1/CCND1/RUNX1/CLDN9/CLDN10/CLDN2/CD1A	9	pathway_KEGG	0.0351562	Up
hsa00730	hsa00730	Thiamine metabolism	2/256	16/8093	0.0894164	0.422136	0.383006	AK1/ALPL	2	pathway_KEGG	0.0078125	Up
hsa01522	hsa01522	Endocrine resistance	6/256	98/8093	0.0897827	0.422136	0.383006	E2F1/JAG2/CCND1/CDKN2A/CDKN1A/ADCY8	6	pathway_KEGG	0.0234375	Up
hsa04640	hsa04640	Hematopoietic cell lineage	6/256	99/8093	0.0931884	0.430595	0.390681	CSF2/ITGA2/ITGA3/CD44/CD55/CD1A	6	pathway_KEGG	0.0234375	Up
hsa05146	hsa05146	Amoebiasis	6/256	102/8093	0.103817	0.471578	0.427865	TGFB1/FN1/LAMB3/CSF2/CD1A/COL1A1	6	pathway_KEGG	0.0234375	Up
hsa04145	hsa04145	Phagosome	8/256	152/8093	0.10869	0.485482	0.440481	MRC2/ITGA2/COMP/CTSS/MARCO/SFTPA1/HLA-G/SFTPA2	8	pathway_KEGG	0.03125	Up
GO:0030198	GO:0030198	extracellular matrix organization	46/521	395/18866	1.34709e-16	3.27585e-13	2.70919e-13	DPP4/COL13A1/TGFB1/SPINT1/BMP1/ICAM5/FN1/LAMB3/LOXL2/TMPRSS6/TIMP1/ITGA2/ADAMTS9/VWA1/ITGA3/MMP11/KLK7/HAPLN1/QSOX1/ICAM1/PRSS2/CD44/COMP/TGFBR1/MMP16/NID1/PXDN/COL8A1/TGFBI/ADAMTS14/ITGB4/CTSS/CYP1B1/ELF3/MFAP2/PRSS1/ADTRP/SPOCK2/HPN/TNC/POSTN/MMP7/COL1A1/COL8A2/COL10A1/SPP1	46	geneontology_Biological_Process	0.0882917	Up
GO:0043062	GO:0043062	extracellular structure organization	46/521	396/18866	1.48599e-16	3.27585e-13	2.70919e-13	DPP4/COL13A1/TGFB1/SPINT1/BMP1/ICAM5/FN1/LAMB3/LOXL2/TMPRSS6/TIMP1/ITGA2/ADAMTS9/VWA1/ITGA3/MMP11/KLK7/HAPLN1/QSOX1/ICAM1/PRSS2/CD44/COMP/TGFBR1/MMP16/NID1/PXDN/COL8A1/TGFBI/ADAMTS14/ITGB4/CTSS/CYP1B1/ELF3/MFAP2/PRSS1/ADTRP/SPOCK2/HPN/TNC/POSTN/MMP7/COL1A1/COL8A2/COL10A1/SPP1	46	geneontology_Biological_Process	0.0882917	Up
GO:0007162	GO:0007162	negative regulation of cell adhesion	30/521	301/18866	1.39337e-09	2.04779e-06	1.69355e-06	PLXND1/TGFB1/FXYD5/RUNX1/SDC4/CX3CL1/MDK/LGALS3/ARHGDIB/MUC21/PLXNC1/CDKN2A/PDE5A/TACSTD2/TNFRSF21/TGFBI/CYP1B1/LGALS1/ADTRP/SPOCK1/ANXA1/PELI1/TNC/PLXNA4/ERBB3/VTCN1/POSTN/COL1A1/MUC1/HLA-G	30	geneontology_Biological_Process	0.0575816	Up
GO:0050808	GO:0050808	synapse organization	35/521	433/18866	1.51393e-08	1.59342e-05	1.31778e-05	SRCIN1/LRP4/NGEF/GABRB2/PLXND1/NRCAM/SPTBN2/EPHB3/ETV5/LRRK2/TIAM1/SEMA3F/DLG4/SLIT1/GLRB/CX3CL1/AMIGO2/DOK7/NRP2/ITGA3/IL1RAP/C1QL1/CDH2/SYN1/CACNB1/F2R/GAP43/PALM/CBLN1/SDK1/TREM2/SHISA6/SPOCK2/APOE/TNC	35	geneontology_Biological_Process	0.0671785	Up
GO:0022604	GO:0022604	regulation of cell morphogenesis	38/521	499/18866	1.80701e-08	1.59342e-05	1.31778e-05	SRCIN1/LRP4/NGEF/PLXND1/NRCAM/EPHB3/LRRK2/TIAM1/SEMA6B/FN1/SEMA3F/DLG4/EPS8/TNFRSF12A/DRAXIN/MDK/CDC42EP1/LZTS1/PLXNC1/WNT3/CDH4/CDH2/ICAM1/TRPC5/CD44/TACSTD2/CDC42EP5/CDC42EP3/PALM/CCL13/ANXA1/APOE/HPN/PLXNA4/SYT1/POSTN/CRABP2/SPP1	38	geneontology_Biological_Process	0.0729367	Up
GO:0043588	GO:0043588	skin development	34/521	425/18866	3.14957e-08	2.06844e-05	1.71063e-05	ETV4/LRP4/CDH3/GJB3/CNFN/SCEL/GRHL3/RYR1/CLDN1/RUNX1/MET/TMEM79/KRT15/KLK13/ITGA2/ITGA3/EVPL/SFN/PERP/COMP/ALOX15B/KRT80/IVL/ITGB4/CD109/WNT10A/ANXA1/FOXQ1/KRT27/KRT19/KRT17/DSC3/KLK12/COL1A1	34	geneontology_Biological_Process	0.0652591	Up
GO:0071902	GO:0071902	positive regulation of protein serine/threonine kinase activity	30/521	345/18866	3.28398e-08	2.06844e-05	1.71063e-05	GDF15/HMGA2/ADORA1/MAP3K6/TENM1/TGFA/TGFB1/LRRK2/TIAM1/TPD52L1/NOX4/DUSP6/CCND1/CCND2/FGF1/CKS2/NOD1/CXCL17/TGFBR1/PDE5A/TCIM/F2R/FAM20A/BIRC7/DUSP5/CSPG4/INAVA/MST1R/GRM4/IGFBP6	30	geneontology_Biological_Process	0.0575816	Up
GO:0022617	GO:0022617	extracellular matrix disassembly	14/521	82/18866	4.95542e-08	2.73105e-05	2.25863e-05	DPP4/TGFB1/BMP1/TMPRSS6/TIMP1/MMP11/KLK7/PRSS2/CD44/MMP16/CTSS/PRSS1/HPN/MMP7	14	geneontology_Biological_Process	0.0268714	Up
GO:0099173	GO:0099173	postsynapse organization	20/521	173/18866	6.98459e-08	3.42167e-05	2.82978e-05	SRCIN1/LRP4/NGEF/NRCAM/SPTBN2/EPHB3/ETV5/LRRK2/TIAM1/SEMA3F/DLG4/GLRB/NRP2/ITGA3/IL1RAP/CDH2/GAP43/CBLN1/SHISA6/APOE	20	geneontology_Biological_Process	0.0383877	Up
GO:0031589	GO:0031589	cell-substrate adhesion	30/521	359/18866	7.96502e-08	3.51178e-05	2.9043e-05	SRCIN1/COL13A1/EPHB3/TIAM1/EDIL3/FN1/AGR2/LAMB3/SDC4/CX3CL1/TYRO3/TNFRSF12A/ITGA2/MDK/PLAU/ADAMTS9/ITGA3/CDKN2A/CD44/NID1/TACSTD2/COL8A1/ITGB4/LGALS1/CEACAM6/SPOCK1/SPOCK2/POSTN/MYO1G/COL1A1	30	geneontology_Biological_Process	0.0575816	Up
GO:0008544	GO:0008544	epidermis development	35/521	477/18866	1.65474e-07	6.63251e-05	5.4852e-05	ETV4/LRP4/CDH3/JAG2/CNFN/SCEL/GRHL3/HEY2/RUNX1/LAMB3/TMEM79/KRT15/NAB2/KLK13/EDA2R/KLK7/EVPL/SFN/POU2F3/PERP/ALOX15B/KRT80/IVL/BNC1/CD109/WNT10A/ANXA1/FOXQ1/KRT27/KRT19/KRT17/DSC3/KLK12/CST6/CRABP2	35	geneontology_Biological_Process	0.0671785	Up
GO:0043406	GO:0043406	positive regulation of MAP kinase activity	24/521	264/18866	3.50281e-07	0.000126598	0.000104699	GDF15/ADORA1/MAP3K6/TENM1/TGFA/TGFB1/LRRK2/TIAM1/TPD52L1/NOX4/DUSP6/FGF1/NOD1/CXCL17/TGFBR1/PDE5A/F2R/BIRC7/DUSP5/CSPG4/INAVA/MST1R/GRM4/IGFBP6	24	geneontology_Biological_Process	0.0460653	Up
GO:0045785	GO:0045785	positive regulation of cell adhesion	32/521	428/18866	3.73276e-07	0.000126598	0.000104699	DPP4/EDIL3/RUNX1/FN1/AGR2/SDC4/CX3CL1/DYSF/ITGA2/MDK/ITGA3/SOX4/ICAM1/PRSS2/CD44/NID1/COL8A1/FRMD5/IGFBP2/TGM2/EBI3/LGALS1/CD55/CEACAM6/FSTL3/PLAUR/ALOX5/ANXA1/SPOCK2/PNP/VTCN1/HLA-G	32	geneontology_Biological_Process	0.0614203	Up
GO:0030574	GO:0030574	collagen catabolic process	10/521	47/18866	4.89165e-07	0.00014994	0.000124002	COL13A1/MRC2/TMPRSS6/MMP11/PRSS2/MMP16/ADAMTS14/CTSS/KLK6/MMP7	10	geneontology_Biological_Process	0.0191939	Up
GO:0032963	GO:0032963	collagen metabolic process	15/521	113/18866	5.10114e-07	0.00014994	0.000124002	COL13A1/TGFB1/MRC2/TMPRSS6/UCN/ITGA2/MMP11/PRSS2/MMP16/F2R/ADAMTS14/CTSS/KLK6/MMP7/COL1A1	15	geneontology_Biological_Process	0.0287908	Up
GO:0010769	GO:0010769	regulation of cell morphogenesis involved in differentiation	26/521	310/18866	5.48724e-07	0.000151208	0.000125051	SRCIN1/LRP4/NGEF/PLXND1/NRCAM/EPHB3/LRRK2/TIAM1/SEMA6B/FN1/SEMA3F/TNFRSF12A/DRAXIN/MDK/LZTS1/PLXNC1/WNT3/CDH4/CDH2/TRPC5/TACSTD2/APOE/PLXNA4/POSTN/CRABP2/SPP1	26	geneontology_Biological_Process	0.049904	Up
GO:0043312	GO:0043312	neutrophil degranulation	34/521	487/18866	7.84294e-07	0.000203409	0.000168222	NPC2/ABR/TMC6/CDA/QPCT/S100A11/ALDH3B1/MVP/SERPINA1/CTSH/STING1/LRG1/PLAU/LCN2/LGALS3/RAB27A/QSOX1/CTSC/PRSS2/CD44/CHI3L1/CTSS/CD55/CEACAM6/SLCO4C1/PLAUR/ALOX5/ATP11A/RETN/PNP/MCEMP1/AOC1/SLPI/CD177	34	geneontology_Biological_Process	0.0652591	Up
GO:0098742	GO:0098742	cell-cell adhesion via plasma-membrane adhesion molecules	24/521	277/18866	8.38306e-07	0.000205339	0.000169818	CDH3/NECTIN4/MPZL2/CLDN16/TENM1/CDH6/FXYD5/CLDN1/CX3CL1/CLDN9/AMIGO2/CLDN10/IL1RAP/CDH4/CDH2/ICAM1/VSTM2L/CLDN2/CDH22/CEACAM6/CBLN1/SDK1/DSC3/CD177	24	geneontology_Biological_Process	0.0460653	Up
GO:0002283	GO:0002283	neutrophil activation involved in immune response	34/521	490/18866	9.01389e-07	0.00020917	0.000172987	NPC2/ABR/TMC6/CDA/QPCT/S100A11/ALDH3B1/MVP/SERPINA1/CTSH/STING1/LRG1/PLAU/LCN2/LGALS3/RAB27A/QSOX1/CTSC/PRSS2/CD44/CHI3L1/CTSS/CD55/CEACAM6/SLCO4C1/PLAUR/ALOX5/ATP11A/RETN/PNP/MCEMP1/AOC1/SLPI/CD177	34	geneontology_Biological_Process	0.0652591	Up
GO:0050770	GO:0050770	regulation of axonogenesis	19/521	186/18866	1.0213e-06	0.000225145	0.000186199	LRP4/PLXND1/NRCAM/EPHB3/TIAM1/SEMA6B/FN1/SEMA3F/TNFRSF12A/DRAXIN/PLXNC1/WNT3/CDH4/CDH2/TRPC5/APOE/PLXNA4/CRABP2/SPP1	19	geneontology_Biological_Process	0.0364683	Up
GO:0099175	GO:0099175	regulation of postsynapse organization	14/521	107/18866	1.45794e-06	0.000306097	0.000253147	SRCIN1/LRP4/NGEF/NRCAM/LRRK2/TIAM1/SEMA3F/NRP2/IL1RAP/CDH2/GAP43/CBLN1/SHISA6/APOE	14	geneontology_Biological_Process	0.0268714	Up
GO:0045216	GO:0045216	cell-cell junction organization	20/521	210/18866	1.6123e-06	0.000323119	0.000267224	CDH3/NECTIN4/CLDN16/CDH6/TGFB1/CLDN1/RUNX1/CLDN9/GJA4/CLDN10/CDH4/CDH2/PERP/TGFBR1/F2R/INAVA/CLDN2/CDH22/SDK1/CD177	20	geneontology_Biological_Process	0.0383877	Up
GO:0043114	GO:0043114	regulation of vascular permeability	9/521	45/18866	3.18621e-06	0.000610782	0.000505127	PTP4A3/ABR/TGFB1/HRH1/UCN/ADM/GPR4/C2CD4A/APOE	9	geneontology_Biological_Process	0.0172745	Up
GO:0043405	GO:0043405	regulation of MAP kinase activity	26/521	342/18866	3.44545e-06	0.000632959	0.000523467	GDF15/ADORA1/MAP3K6/DUSP4/TENM1/TGFA/TGFB1/LRRK2/TIAM1/TPD52L1/NOX4/DUSP6/FGF1/NOD1/CXCL17/TGFBR1/PDE5A/F2R/BIRC7/DUSP5/CSPG4/INAVA/MST1R/GRM4/APOE/IGFBP6	26	geneontology_Biological_Process	0.049904	Up
GO:0031346	GO:0031346	positive regulation of cell projection organization	28/521	394/18866	5.32641e-06	0.000939365	0.000776871	SCN1B/PLXND1/TENM1/TIAM1/FN1/DLG4/EPS8/CX3CL1/TNFRSF12A/ITGA2/MDK/LCN2/ITGA3/CDC42EP1/PLXNC1/ESPN/WNT3/CDH4/TRPC5/TGFBR1/CDC42EP5/CDC42EP3/PALM/STMN2/APOE/PLXNA4/SYT1/CRABP2	28	geneontology_Biological_Process	0.0537428	Up
GO:0060560	GO:0060560	developmental growth involved in morphogenesis	20/521	236/18866	9.53423e-06	0.00161679	0.00133711	NRCAM/TIAM1/SEMA6B/FN1/SEMA3F/SLIT1/TNFRSF12A/DRAXIN/NRP2/FGF1/WNT3/CDH4/TRPC5/APOE/TNC/PLXNA4/SYT1/POSTN/CRABP2/SPP1	20	geneontology_Biological_Process	0.0383877	Up
GO:0034329	GO:0034329	cell junction assembly	29/521	434/18866	1.18235e-05	0.001874	0.00154983	LRP4/GABRB2/PLXND1/CLDN16/NRCAM/SPTBN2/EPHB3/CDH6/CLDN1/RUNX1/FN1/SLIT1/LAMB3/SDC4/CLDN9/AMIGO2/ITGA2/GJA4/CD151/CLDN10/IL1RAP/CDH2/GAP43/CLDN2/ITGB4/CDH22/CBLN1/SDK1/SPOCK2	29	geneontology_Biological_Process	0.0556622	Up
GO:0061387	GO:0061387	regulation of extent of cell growth	13/521	111/18866	1.19011e-05	0.001874	0.00154983	NRCAM/SEMA6B/FN1/SEMA3F/TNFRSF12A/DRAXIN/WNT3/CDH4/TRPC5/APOE/PLXNA4/CRABP2/SPP1	13	geneontology_Biological_Process	0.024952	Up
GO:0022407	GO:0022407	regulation of cell-cell adhesion	29/521	439/18866	1.46604e-05	0.00222889	0.00184333	DPP4/EPHB3/TGFB1/FXYD5/RUNX1/SDC4/CX3CL1/MDK/LGALS3/MUC21/SOX4/ICAM1/CD44/PDE5A/TNFRSF21/IGFBP2/EBI3/LGALS1/CD55/CEACAM6/FSTL3/PLAUR/ALOX5/ADTRP/ANXA1/PELI1/PNP/VTCN1/HLA-G	29	geneontology_Biological_Process	0.0556622	Up
GO:0031644	GO:0031644	regulation of nervous system process	15/521	148/18866	1.52942e-05	0.00224774	0.00185892	ADORA1/LRRK2/DLG4/CELF4/ITGA2/NPTXR/NMU/CTSC/TNFRSF21/F2R/NPTX2/CACNG4/CBLN1/SHISA6/TMEM100	15	geneontology_Biological_Process	0.0287908	Up
GO:1902285	GO:1902285	semaphorin-plexin signaling pathway involved in neuron projection guidance	5/521	13/18866	1.68768e-05	0.00239809	0.00198326	PLXND1/SEMA3F/NRP2/PLXNC1/PLXNA4	5	geneontology_Biological_Process	0.00959693	Up
GO:0030199	GO:0030199	collagen fibril organization	9/521	55/18866	1.7892e-05	0.00239809	0.00198326	COL13A1/LOXL2/MMP11/COMP/TGFBR1/PXDN/ADAMTS14/CYP1B1/COL1A1	9	geneontology_Biological_Process	0.0172745	Up
GO:0046883	GO:0046883	regulation of hormone secretion	21/521	267/18866	1.7949e-05	0.00239809	0.00198326	ADORA1/DPP4/TIAM1/REN/BAIAP3/SREBF1/UCN/NR1D1/SOX4/C1QTNF12/NMU/KCNS3/APLN/SCG5/ADCY8/ALOX5/ARNTL/ANXA1/RETN/INHBB/SPP1	21	geneontology_Biological_Process	0.0403071	Up
GO:0050795	GO:0050795	regulation of behavior	10/521	70/18866	2.12222e-05	0.00275203	0.00227597	ADORA1/DLG4/STRA6/CSF2/UCN/NR1D1/MDK/NMU/RETN/APOE	10	geneontology_Biological_Process	0.0191939	Up
GO:1990138	GO:1990138	neuron projection extension	16/521	172/18866	2.35931e-05	0.00297206	0.00245794	NRCAM/TIAM1/SEMA6B/FN1/SEMA3F/SLIT1/TNFRSF12A/DRAXIN/NRP2/WNT3/CDH4/TRPC5/APOE/PLXNA4/SYT1/POSTN	16	geneontology_Biological_Process	0.0307102	Up
GO:0016338	GO:0016338	calcium-independent cell-cell adhesion via plasma membrane cell-adhesion molecules	6/521	23/18866	2.915e-05	0.00357006	0.0029525	CLDN16/CLDN1/CX3CL1/CLDN9/CLDN10/CLDN2	6	geneontology_Biological_Process	0.0115163	Up
GO:0007409	GO:0007409	axonogenesis	30/521	482/18866	3.23314e-05	0.00385267	0.00318622	LRP4/SCN1B/PLXND1/UNC5B/NRCAM/SPTBN2/EPHB3/TIAM1/SEMA6B/FN1/SEMA3F/GRB7/SLIT1/EPHA10/TNFRSF12A/DRAXIN/PDLIM7/NRP2/PLXNC1/WNT3/CDH4/S100A6/CDH2/VSTM2L/TRPC5/GAP43/APOE/PLXNA4/CRABP2/SPP1	30	geneontology_Biological_Process	0.0575816	Up
GO:0010810	GO:0010810	regulation of cell-substrate adhesion	18/521	217/18866	3.5108e-05	0.00407327	0.00336866	EDIL3/FN1/AGR2/SDC4/CX3CL1/MDK/PLAU/ITGA3/CDKN2A/NID1/TACSTD2/COL8A1/LGALS1/CEACAM6/SPOCK1/SPOCK2/POSTN/COL1A1	18	geneontology_Biological_Process	0.0345489	Up
GO:0048675	GO:0048675	axon extension	13/521	123/18866	3.60303e-05	0.00407327	0.00336866	NRCAM/SEMA6B/FN1/SEMA3F/SLIT1/TNFRSF12A/DRAXIN/NRP2/WNT3/CDH4/TRPC5/APOE/PLXNA4	13	geneontology_Biological_Process	0.024952	Up
GO:0090594	GO:0090594	inflammatory response to wounding	5/521	15/18866	3.76135e-05	0.00414595	0.00342877	TGFB1/TIMP1/MDK/F2R/ALOX5	5	geneontology_Biological_Process	0.00959693	Up
GO:0007157	GO:0007157	heterophilic cell-cell adhesion via plasma membrane cell adhesion molecules	8/521	47/18866	3.90523e-05	0.00419955	0.00347309	NECTIN4/TENM1/AMIGO2/CDH4/CDH2/ICAM1/CEACAM6/CBLN1	8	geneontology_Biological_Process	0.0153551	Up
GO:0016049	GO:0016049	cell growth	30/521	490/18866	4.3816e-05	0.00459964	0.00380398	CDA/NRCAM/TGFB1/TIAM1/SEMA6B/FN1/SEMA3F/SLIT1/TNFRSF12A/DRAXIN/UCN/DCSTAMP/NRP2/WNT3/CDKN2A/SFN/CDH4/CDKN1A/PRSS2/TRPC5/TGFBR1/SPOCK1/APOE/HPN/PLXNA4/SYT1/POSTN/KRT17/CRABP2/SPP1	30	geneontology_Biological_Process	0.0575816	Up
GO:0071621	GO:0071621	granulocyte chemotaxis	13/521	127/18866	5.04864e-05	0.00517661	0.00428115	DPP4/CX3CL1/HRH1/DYSF/MDK/LGALS3/CXCL17/CCL13/ANXA1/DAPK2/CCL20/CCL17/CCL18	13	geneontology_Biological_Process	0.024952	Up
GO:0014013	GO:0014013	regulation of gliogenesis	13/521	128/18866	5.48051e-05	0.00549173	0.00454175	E2F1/ETV5/TGFB1/SPINT1/TIAM1/BMERB1/CX3CL1/NR1D1/MDK/CDH2/PLAG1/TNFRSF21/TREM2	13	geneontology_Biological_Process	0.024952	Up
GO:0035640	GO:0035640	exploration behavior	6/521	26/18866	6.19606e-05	0.00607076	0.00502062	DPP4/LRRK2/DLG4/ITGA3/BRINP1/APOE	6	geneontology_Biological_Process	0.0115163	Up
GO:0046879	GO:0046879	hormone secretion	22/521	314/18866	6.64102e-05	0.00636528	0.00526419	ADORA1/DPP4/TIAM1/REN/BAIAP3/SREBF1/UCN/NR1D1/ADM/SOX4/C1QTNF12/NMU/KCNS3/APLN/SCG5/ADCY8/ALOX5/ARNTL/ANXA1/RETN/INHBB/SPP1	22	geneontology_Biological_Process	0.0422265	Up
GO:0070268	GO:0070268	cornification	12/521	113/18866	6.81931e-05	0.00639709	0.0052905	TMEM79/KRT15/KLK13/EVPL/PERP/KRT80/IVL/KRT27/KRT19/KRT17/DSC3/KLK12	12	geneontology_Biological_Process	0.0230326	Up
GO:0050807	GO:0050807	regulation of synapse organization	18/521	229/18866	7.09439e-05	0.00651649	0.00538925	SRCIN1/LRP4/NGEF/NRCAM/EPHB3/ETV5/LRRK2/TIAM1/SEMA3F/SLIT1/AMIGO2/NRP2/IL1RAP/CDH2/GAP43/CBLN1/SHISA6/APOE	18	geneontology_Biological_Process	0.0345489	Up
GO:0097530	GO:0097530	granulocyte migration	14/521	150/18866	7.27722e-05	0.00654801	0.00541532	DPP4/CX3CL1/HRH1/DYSF/MDK/LGALS3/CXCL17/CCL13/ANXA1/DAPK2/CCL20/CCL17/CD177/CCL18	14	geneontology_Biological_Process	0.0268714	Up
GO:0030516	GO:0030516	regulation of axon extension	11/521	97/18866	7.47794e-05	0.00659405	0.00545339	NRCAM/SEMA6B/FN1/SEMA3F/TNFRSF12A/DRAXIN/WNT3/CDH4/TRPC5/APOE/PLXNA4	11	geneontology_Biological_Process	0.0211132	Up
GO:0003018	GO:0003018	vascular process in circulatory system	16/521	190/18866	7.89538e-05	0.00682564	0.00564491	PTP4A3/ABR/ADORA1/TGFB1/ADRA1B/ECE1/HRH1/UCN/ADM/GPR4/ICAM1/COMP/F2R/APLN/C2CD4A/APOE	16	geneontology_Biological_Process	0.0307102	Up
GO:0002685	GO:0002685	regulation of leukocyte migration	17/521	212/18866	8.76045e-05	0.00742785	0.00614295	ABR/ADORA1/DPP4/CX3CL1/DYSF/ITGA2/MDK/LGALS3/ICAM1/CXCL17/ECM1/TREM2/ADTRP/ANXA1/DAPK2/CCL20/CXCL14	17	geneontology_Biological_Process	0.0326296	Up
GO:0071526	GO:0071526	semaphorin-plexin signaling pathway	7/521	40/18866	9.94549e-05	0.00812309	0.00671793	PLXND1/SEMA6B/SEMA3F/MET/NRP2/PLXNC1/PLXNA4	7	geneontology_Biological_Process	0.0134357	Up
GO:0009914	GO:0009914	hormone transport	22/521	323/18866	0.000100438	0.00812309	0.00671793	ADORA1/DPP4/TIAM1/REN/BAIAP3/SREBF1/UCN/NR1D1/ADM/SOX4/C1QTNF12/NMU/KCNS3/APLN/SCG5/ADCY8/ALOX5/ARNTL/ANXA1/RETN/INHBB/SPP1	22	geneontology_Biological_Process	0.0422265	Up
GO:0048545	GO:0048545	response to steroid hormone	23/521	346/18866	0.000101331	0.00812309	0.00671793	RXRG/TGFB1/CLDN1/CCND1/RUNX1/SREBF1/UCN/NR1D1/ADM/MDK/CATSPER1/CDKN1A/ICAM1/SSTR3/LMO3/IGFBP2/TRIM63/ALPL/ADTRP/ARNTL/ANXA1/COL1A1/SPP1	23	geneontology_Biological_Process	0.0441459	Up
GO:0050731	GO:0050731	positive regulation of peptidyl-tyrosine phosphorylation	16/521	195/18866	0.000107279	0.00830476	0.00686817	SRCIN1/LRP4/ADORA1/TGFA/TGFB1/NOX4/DLG4/CSF2/DOK7/GPRC5B/ICAM1/CD44/CSPG4/TREM2/CRLF1/ERBB3	16	geneontology_Biological_Process	0.0307102	Up
GO:0070371	GO:0070371	ERK1 and ERK2 cascade	22/521	325/18866	0.000109833	0.00830476	0.00686817	DUSP4/TGFB1/TIAM1/NOX4/DUSP6/FN1/CX3CL1/CAMK2N1/CTSH/NOD1/ICAM1/CD44/CHI3L1/F2R/LMO3/TREM2/CCL13/APOE/CCL20/CCL17/MARCO/CCL18	22	geneontology_Biological_Process	0.0422265	Up
GO:0048588	GO:0048588	developmental cell growth	18/521	237/18866	0.000110053	0.00830476	0.00686817	NRCAM/TIAM1/SEMA6B/FN1/SEMA3F/SLIT1/TNFRSF12A/DRAXIN/NRP2/WNT3/CDH4/TRPC5/APOE/PLXNA4/SYT1/POSTN/CRABP2/SPP1	18	geneontology_Biological_Process	0.0345489	Up
GO:0000187	GO:0000187	activation of MAPK activity	14/521	156/18866	0.000111132	0.00830476	0.00686817	GDF15/MAP3K6/TGFA/LRRK2/DUSP6/FGF1/NOD1/CXCL17/BIRC7/DUSP5/CSPG4/INAVA/GRM4/IGFBP6	14	geneontology_Biological_Process	0.0268714	Up
GO:0001941	GO:0001941	postsynaptic membrane organization	7/521	41/18866	0.000117106	0.00833913	0.0068966	LRP4/ETV5/DLG4/GLRB/CDH2/SHISA6/APOE	7	geneontology_Biological_Process	0.0134357	Up
GO:0001558	GO:0001558	regulation of cell growth	26/521	420/18866	0.000117428	0.00833913	0.0068966	CDA/NRCAM/TGFB1/SEMA6B/FN1/SEMA3F/TNFRSF12A/DRAXIN/UCN/DCSTAMP/WNT3/CDKN2A/SFN/CDH4/CDKN1A/PRSS2/TRPC5/TGFBR1/SPOCK1/APOE/HPN/PLXNA4/SYT1/KRT17/CRABP2/SPP1	26	geneontology_Biological_Process	0.049904	Up
GO:0001958	GO:0001958	endochondral ossification	6/521	29/18866	0.000119158	0.00833913	0.0068966	COL13A1/NAB2/MMP16/RUNX2/ALPL/COL1A1	6	geneontology_Biological_Process	0.0115163	Up
GO:0036075	GO:0036075	replacement ossification	6/521	29/18866	0.000119158	0.00833913	0.0068966	COL13A1/NAB2/MMP16/RUNX2/ALPL/COL1A1	6	geneontology_Biological_Process	0.0115163	Up
GO:0050772	GO:0050772	positive regulation of axonogenesis	10/521	86/18866	0.000127751	0.00837087	0.00692285	PLXND1/TIAM1/FN1/TNFRSF12A/PLXNC1/WNT3/CDH4/TRPC5/PLXNA4/CRABP2	10	geneontology_Biological_Process	0.0191939	Up
GO:0050803	GO:0050803	regulation of synapse structure or activity	18/521	240/18866	0.000129007	0.00837087	0.00692285	SRCIN1/LRP4/NGEF/NRCAM/EPHB3/ETV5/LRRK2/TIAM1/SEMA3F/SLIT1/AMIGO2/NRP2/IL1RAP/CDH2/GAP43/CBLN1/SHISA6/APOE	18	geneontology_Biological_Process	0.0345489	Up
GO:0030111	GO:0030111	regulation of Wnt signaling pathway	24/521	375/18866	0.000129054	0.00837087	0.00692285	LRP4/CDH3/SCEL/TGFB1/LRRK2/TIAM1/RUNX1/CITED1/DRAXIN/MDK/ITGA3/MDFI/SOX4/GPRC5B/WNT3/CDH2/IGFBP2/SHISA6/ARNTL/RSPO4/APOE/DEPDC1B/IGFBP6/COL1A1	24	geneontology_Biological_Process	0.0460653	Up
GO:0030216	GO:0030216	keratinocyte differentiation	21/521	306/18866	0.000129302	0.00837087	0.00692285	ETV4/CDH3/CNFN/SCEL/RUNX1/TMEM79/KRT15/KLK13/EVPL/SFN/PERP/ALOX15B/KRT80/IVL/CD109/ANXA1/KRT27/KRT19/KRT17/DSC3/KLK12	21	geneontology_Biological_Process	0.0403071	Up
GO:0070372	GO:0070372	regulation of ERK1 and ERK2 cascade	21/521	306/18866	0.000129302	0.00837087	0.00692285	DUSP4/TGFB1/TIAM1/NOX4/DUSP6/FN1/CX3CL1/CAMK2N1/NOD1/ICAM1/CD44/CHI3L1/F2R/LMO3/TREM2/CCL13/APOE/CCL20/CCL17/MARCO/CCL18	21	geneontology_Biological_Process	0.0403071	Up
GO:0007411	GO:0007411	axon guidance	20/521	284/18866	0.000131532	0.00837087	0.00692285	SCN1B/PLXND1/UNC5B/NRCAM/SPTBN2/EPHB3/SEMA6B/SEMA3F/GRB7/SLIT1/EPHA10/DRAXIN/PDLIM7/NRP2/PLXNC1/WNT3/CDH4/VSTM2L/GAP43/PLXNA4	20	geneontology_Biological_Process	0.0383877	Up
GO:0048245	GO:0048245	eosinophil chemotaxis	5/521	19/18866	0.000132901	0.00837087	0.00692285	CX3CL1/HRH1/LGALS3/CCL13/DAPK2	5	geneontology_Biological_Process	0.00959693	Up
GO:0097485	GO:0097485	neuron projection guidance	20/521	285/18866	0.000137909	0.00856395	0.00708253	SCN1B/PLXND1/UNC5B/NRCAM/SPTBN2/EPHB3/SEMA6B/SEMA3F/GRB7/SLIT1/EPHA10/DRAXIN/PDLIM7/NRP2/PLXNC1/WNT3/CDH4/VSTM2L/GAP43/PLXNA4	20	geneontology_Biological_Process	0.0383877	Up
GO:0032147	GO:0032147	activation of protein kinase activity	22/521	331/18866	0.000142876	0.00874917	0.00723571	GDF15/ADORA1/MAP3K6/TGFA/LRRK2/DUSP6/UCN/FGF1/GPRC5B/NOD1/CXCL17/TGFBR1/CHI3L1/TNFSF15/F2R/BIRC7/DUSP5/CSPG4/INAVA/ADCY8/GRM4/IGFBP6	22	geneontology_Biological_Process	0.0422265	Up
GO:0071711	GO:0071711	basement membrane organization	6/521	30/18866	0.000145499	0.00878775	0.00726761	LAMB3/MMP11/NID1/PXDN/CTSS/HPN	6	geneontology_Biological_Process	0.0115163	Up
GO:0008361	GO:0008361	regulation of cell size	15/521	181/18866	0.000156518	0.0093255	0.00771235	NRCAM/SEMA6B/FN1/SEMA3F/TNFRSF12A/DRAXIN/UCN/KCNN4/WNT3/CDH4/TRPC5/APOE/PLXNA4/CRABP2/SPP1	15	geneontology_Biological_Process	0.0287908	Up
GO:0002791	GO:0002791	regulation of peptide secretion	24/521	381/18866	0.000164035	0.00961797	0.00795422	SRCIN1/ADORA1/DPP4/TGFB1/TIAM1/BAIAP3/SREBF1/UCN/NR1D1/SOX4/KCNN4/C1QTNF12/NMU/KCNS3/F2R/APLN/ADCY8/ALOX5/TREM2/ADTRP/ARNTL/ANXA1/APOE/INHBB	24	geneontology_Biological_Process	0.0460653	Up
GO:1904029	GO:1904029	regulation of cyclin-dependent protein kinase activity	11/521	106/18866	0.000167277	0.00961797	0.00795422	CDKN2B/CCND1/CAMK2N1/CCND2/CKS2/CDKN2A/SFN/CDKN1A/DIRAS3/CCNA1/CCNP	11	geneontology_Biological_Process	0.0211132	Up
GO:0050804	GO:0050804	modulation of chemical synaptic transmission	27/521	454/18866	0.000168593	0.00961797	0.00795422	ABR/ADORA1/LRRK2/RIN1/DLG4/CELF4/CX3CL1/SYT12/BAIAP3/HRH1/UCN/NPTXR/LZTS1/RASGRF1/NMU/CDH2/SYN1/F2R/NPTX2/CACNG4/ADCY8/CBLN1/GRM4/SHISA6/RETN/APOE/SYT1	27	geneontology_Biological_Process	0.0518234	Up
GO:0001892	GO:0001892	embryonic placenta development	10/521	89/18866	0.000170427	0.00961797	0.00795422	PLCD3/HEY2/SPINT1/CITED1/CSF2/ADM/MDFI/PHLDA2/PRDM1/KRT19	10	geneontology_Biological_Process	0.0191939	Up
GO:0099177	GO:0099177	regulation of trans-synaptic signaling	27/521	455/18866	0.0001747	0.00961797	0.00795422	ABR/ADORA1/LRRK2/RIN1/DLG4/CELF4/CX3CL1/SYT12/BAIAP3/HRH1/UCN/NPTXR/LZTS1/RASGRF1/NMU/CDH2/SYN1/F2R/NPTX2/CACNG4/ADCY8/CBLN1/GRM4/SHISA6/RETN/APOE/SYT1	27	geneontology_Biological_Process	0.0518234	Up
GO:0045940	GO:0045940	positive regulation of steroid metabolic process	6/521	31/18866	0.000176245	0.00961797	0.00795422	SREBF1/NR1D1/ADM/FGF1/APOE/APOC1	6	geneontology_Biological_Process	0.0115163	Up
GO:2001235	GO:2001235	positive regulation of apoptotic signaling pathway	15/521	183/18866	0.000176697	0.00961797	0.00795422	BBC3/E2F1/BID/TPD52L1/CTSH/TNFRSF12A/SFN/CTSC/TGFBR1/HRK/RNF183/PLAUR/G0S2/PMAIP1/INHBB	15	geneontology_Biological_Process	0.0287908	Up
GO:0001523	GO:0001523	retinoid metabolic process	11/521	108/18866	0.000197577	0.0106234	0.00878572	STRA6/SDC4/LPL/CYP2S1/ALDH1A3/SDC3/RDH5/DHRS3/CYP1B1/APOE/CRABP2	11	geneontology_Biological_Process	0.0211132	Up
GO:0045682	GO:0045682	regulation of epidermis development	10/521	91/18866	0.00020508	0.0108939	0.00900947	ETV4/CDH3/HEY2/RUNX1/TMEM79/NAB2/SFN/ALOX15B/CD109/KRT17	10	geneontology_Biological_Process	0.0191939	Up
GO:1905477	GO:1905477	positive regulation of protein localization to membrane	12/521	127/18866	0.000209484	0.0109809	0.00908135	BBC3/LRP4/E2F1/BID/AGR2/LGALS3/ITGA3/SFN/CLIP3/STAC/TREM2/PMAIP1	12	geneontology_Biological_Process	0.0230326	Up
GO:0048844	GO:0048844	artery morphogenesis	9/521	75/18866	0.000216886	0.0109809	0.00908135	HEY2/STRA6/MDK/ADAMTS9/SOX4/PRDM1/COMP/TGFBR1/APOE	9	geneontology_Biological_Process	0.0172745	Up
GO:0009913	GO:0009913	epidermal cell differentiation	23/521	365/18866	0.00022208	0.0109809	0.00908135	ETV4/CDH3/JAG2/CNFN/SCEL/HEY2/RUNX1/TMEM79/KRT15/KLK13/EVPL/SFN/PERP/ALOX15B/KRT80/IVL/CD109/ANXA1/KRT27/KRT19/KRT17/DSC3/KLK12	23	geneontology_Biological_Process	0.0441459	Up
GO:1903978	GO:1903978	regulation of microglial cell activation	5/521	21/18866	0.00022219	0.0109809	0.00908135	LRRK2/CX3CL1/NR1D1/CTSC/TREM2	5	geneontology_Biological_Process	0.00959693	Up
GO:0048762	GO:0048762	mesenchymal cell differentiation	17/521	229/18866	0.000222434	0.0109809	0.00908135	HMGA2/HEY2/TGFB1/TIAM1/SEMA6B/FN1/SEMA3F/LOXL2/MDK/NRP2/IL17RD/TGFBR1/VASN/WNT10A/HPN/TMEM100/COL1A1	17	geneontology_Biological_Process	0.0326296	Up
GO:0050920	GO:0050920	regulation of chemotaxis	17/521	229/18866	0.000222434	0.0109809	0.00908135	DPP4/TGFB1/TIAM1/SEMA6B/SEMA3F/MET/DYSF/ITGA2/MDK/FGF1/WNT3/CXCL17/TMSB4X/TREM2/DAPK2/PLXNA4/CXCL14	17	geneontology_Biological_Process	0.0326296	Up
GO:0044409	GO:0044409	entry into host	13/521	147/18866	0.00022415	0.0109809	0.00908135	NECTIN4/DPP4/CLDN1/MET/TYRO3/CLDN9/XPR1/ITGA2/ICAM1/FCN3/SLC1A5/LGALS1/CD55	13	geneontology_Biological_Process	0.024952	Up
GO:0007568	GO:0007568	aging	21/521	319/18866	0.000229149	0.0109817	0.00908205	HMGA2/CDKN2B/LRRK2/CLDN1/NOX4/CX3CL1/LOXL2/TIMP1/SREBF1/ADM/CDKN2A/CDKN1A/ICAM1/CTSC/KL/COMP/IGFBP2/ARNTL/RETN/MMP7/HLA-G	21	geneontology_Biological_Process	0.0403071	Up
GO:0051961	GO:0051961	negative regulation of nervous system development	21/521	319/18866	0.000229149	0.0109817	0.00908205	LRP4/NGEF/LRRK2/SEMA6B/BMERB1/SEMA3F/SLIT1/CX3CL1/DRAXIN/NR1D1/WNT3/CTSC/TRPC5/TNFRSF21/BRINP1/LGALS1/CBLN1/SPOCK1/STMN2/APOE/SPP1	21	geneontology_Biological_Process	0.0403071	Up
GO:0061098	GO:0061098	positive regulation of protein tyrosine kinase activity	8/521	60/18866	0.000232132	0.0110051	0.00910137	SRCIN1/ADORA1/TGFA/NOX4/DLG4/DOK7/GPRC5B/ERBB3	8	geneontology_Biological_Process	0.0153551	Up
GO:0031345	GO:0031345	negative regulation of cell projection organization	15/521	188/18866	0.000237283	0.0110273	0.00911972	LRP4/NGEF/LRRK2/SEMA6B/SEMA3F/DRAXIN/ITGA3/WNT3/TRPC5/TACSTD2/LGALS1/SPOCK1/STMN2/APOE/SPP1	15	geneontology_Biological_Process	0.0287908	Up
GO:1902287	GO:1902287	semaphorin-plexin signaling pathway involved in axon guidance	4/521	12/18866	0.000238548	0.0110273	0.00911972	PLXND1/SEMA3F/PLXNC1/PLXNA4	4	geneontology_Biological_Process	0.00767754	Up
GO:1903524	GO:1903524	positive regulation of blood circulation	9/521	76/18866	0.000240104	0.0110273	0.00911972	HEY2/ADRA1B/HRH1/UCN/ADM/NMU/ICAM1/F2R/APLN	9	geneontology_Biological_Process	0.0172745	Up
GO:0034331	GO:0034331	cell junction maintenance	6/521	33/18866	0.000253004	0.0113775	0.00940937	CLDN1/C1QL1/F2R/INAVA/CBLN1/CD177	6	geneontology_Biological_Process	0.0115163	Up
GO:0052547	GO:0052547	regulation of peptidase activity	27/521	466/18866	0.000256095	0.0113775	0.00940937	BBC3/BID/PROS1/SPINT1/FN1/SERPINA1/CTSH/TIMP1/PCSK1N/SPINK2/NOD1/SFN/PERP/CD44/TNFSF15/F2R/BIRC7/ECM1/CST5/CST2/CD109/PLAUR/SPOCK1/SPOCK2/SLPI/PMAIP1/CST6	27	geneontology_Biological_Process	0.0518234	Up
GO:0043524	GO:0043524	negative regulation of neuron apoptotic process	13/521	149/18866	0.000256126	0.0113775	0.00940937	GABRB2/UNC5B/CITED1/CX3CL1/TYRO3/DRAXIN/MDK/VSTM2L/F2R/APOE/FOXQ1/CRLF1/ERBB3	13	geneontology_Biological_Process	0.024952	Up
GO:0052126	GO:0052126	movement in host environment	14/521	169/18866	0.000258051	0.0113775	0.00940937	NECTIN4/DPP4/CLDN1/MET/TYRO3/CLDN9/XPR1/ITGA2/PC/ICAM1/FCN3/SLC1A5/LGALS1/CD55	14	geneontology_Biological_Process	0.0268714	Up
GO:0043954	GO:0043954	cellular component maintenance	8/521	61/18866	0.000260811	0.0113853	0.00941583	CLDN1/ITGA3/C1QL1/F2R/INAVA/CBLN1/APOE/CD177	8	geneontology_Biological_Process	0.0153551	Up
GO:0014015	GO:0014015	positive regulation of gliogenesis	9/521	77/18866	0.000265346	0.0114697	0.00948562	E2F1/ETV5/TGFB1/SPINT1/TIAM1/CX3CL1/MDK/PLAG1/TREM2	9	geneontology_Biological_Process	0.0172745	Up
GO:0048608	GO:0048608	reproductive structure development	26/521	443/18866	0.000271972	0.011642	0.00962812	GJB3/PLCD3/HEY2/SPINT1/CCND1/CITED1/REN/STRA6/CSF2/TYRO3/MAMLD1/ADM/MDFI/PHLDA2/PRDM1/ICAM1/PLAG1/TGFBR1/ALOX15B/FSTL3/ANXA1/RETN/TNC/KRT19/INHBB/SPP1	26	geneontology_Biological_Process	0.049904	Up
GO:0043491	GO:0043491	protein kinase B signaling	19/521	278/18866	0.000281368	0.0119284	0.00986498	PHLDA3/GDF15/TGFA/TGFB1/RASD2/NOX4/CX3CL1/MET/TYRO3/FGF1/C1QTNF12/KL/TGFBR1/CHI3L1/MST1R/ADTRP/ERBB3/TMEM100/HLA-G	19	geneontology_Biological_Process	0.0364683	Up
GO:0022409	GO:0022409	positive regulation of cell-cell adhesion	19/521	279/18866	0.000294374	0.0123084	0.0101792	DPP4/RUNX1/CX3CL1/MDK/SOX4/ICAM1/CD44/IGFBP2/EBI3/LGALS1/CD55/CEACAM6/FSTL3/PLAUR/ALOX5/ANXA1/PNP/VTCN1/HLA-G	19	geneontology_Biological_Process	0.0364683	Up
GO:0050890	GO:0050890	cognition	20/521	302/18866	0.000296733	0.0123084	0.0101792	SHROOM4/ADORA1/TUSC3/RIN1/DLG4/STRA6/PPP1R1B/RTL4/HRH1/UCN/MDK/ITGA3/RASGRF1/C1QL1/MGAT3/BRINP1/NPTX2/ADCY8/TMPRSS11E/APOE	20	geneontology_Biological_Process	0.0383877	Up
GO:0018149	GO:0018149	peptide cross-linking	6/521	34/18866	0.000300123	0.0123084	0.0101792	FN1/EVPL/TGM2/IVL/ANXA1/SPOCK2	6	geneontology_Biological_Process	0.0115163	Up
GO:0045444	GO:0045444	fat cell differentiation	17/521	235/18866	0.000301498	0.0123084	0.0101792	E2F1/HMGA2/TGFB1/CCND1/LAMB3/LRG1/SREBF1/DYSF/LPL/NR1D1/MMP11/CLIP3/LMO3/ALOX5/ARNTL/RETN/INHBB	17	geneontology_Biological_Process	0.0326296	Up
GO:0061458	GO:0061458	reproductive system development	26/521	447/18866	0.000312312	0.0126329	0.0104476	GJB3/PLCD3/HEY2/SPINT1/CCND1/CITED1/REN/STRA6/CSF2/TYRO3/MAMLD1/ADM/MDFI/PHLDA2/PRDM1/ICAM1/PLAG1/TGFBR1/ALOX15B/FSTL3/ANXA1/RETN/TNC/KRT19/INHBB/SPP1	26	geneontology_Biological_Process	0.049904	Up
GO:0016101	GO:0016101	diterpenoid metabolic process	11/521	114/18866	0.000317778	0.0127371	0.0105338	STRA6/SDC4/LPL/CYP2S1/ALDH1A3/SDC3/RDH5/DHRS3/CYP1B1/APOE/CRABP2	11	geneontology_Biological_Process	0.0211132	Up
GO:0031667	GO:0031667	response to nutrient levels	27/521	473/18866	0.00032397	0.0128683	0.0106423	GDF15/CDKN2B/LRRK2/CCND1/UPP1/XPR1/SREBF1/UCN/LPL/ITGA2/PCSK1N/ADM/LCN2/CDKN1A/ICAM1/SSTR3/IGFBP2/ALPL/APOE/TNC/POSTN/AOC1/PMAIP1/INHBB/MMP7/COL1A1/SPP1	27	geneontology_Biological_Process	0.0518234	Up
GO:0035641	GO:0035641	locomotory exploration behavior	4/521	13/18866	0.000337068	0.0131516	0.0108766	DPP4/LRRK2/DLG4/APOE	4	geneontology_Biological_Process	0.00767754	Up
GO:0072578	GO:0072578	neurotransmitter-gated ion channel clustering	4/521	13/18866	0.000337068	0.0131516	0.0108766	DLG4/GLRB/SHISA6/APOE	4	geneontology_Biological_Process	0.00767754	Up
GO:0046718	GO:0046718	viral entry into host cell	12/521	134/18866	0.00034502	0.0132114	0.0109261	NECTIN4/DPP4/CLDN1/TYRO3/CLDN9/XPR1/ITGA2/ICAM1/FCN3/SLC1A5/LGALS1/CD55	12	geneontology_Biological_Process	0.0230326	Up
GO:1903037	GO:1903037	regulation of leukocyte cell-cell adhesion	21/521	329/18866	0.000346966	0.0132114	0.0109261	DPP4/RUNX1/SDC4/MDK/LGALS3/SOX4/ICAM1/CD44/PDE5A/TNFRSF21/IGFBP2/EBI3/LGALS1/CD55/ALOX5/ADTRP/ANXA1/PELI1/PNP/VTCN1/HLA-G	21	geneontology_Biological_Process	0.0403071	Up
GO:0072677	GO:0072677	eosinophil migration	5/521	23/18866	0.000351025	0.0132114	0.0109261	CX3CL1/HRH1/LGALS3/CCL13/DAPK2	5	geneontology_Biological_Process	0.00959693	Up
GO:1905475	GO:1905475	regulation of protein localization to membrane	15/521	195/18866	0.000351778	0.0132114	0.0109261	BBC3/LRP4/E2F1/BID/TGFB1/AGR2/LGALS3/ITGA3/SFN/CLIP3/CDH2/STAC/TREM2/SHISA6/PMAIP1	15	geneontology_Biological_Process	0.0287908	Up
GO:0010977	GO:0010977	negative regulation of neuron projection development	13/521	154/18866	0.000353584	0.0132114	0.0109261	LRP4/NGEF/LRRK2/SEMA6B/SEMA3F/DRAXIN/WNT3/TRPC5/LGALS1/SPOCK1/STMN2/APOE/SPP1	13	geneontology_Biological_Process	0.024952	Up
GO:0001655	GO:0001655	urogenital system development	21/521	330/18866	0.000361248	0.0133844	0.0110691	LRP4/EPHB3/LRRK2/CITED1/REN/STRA6/SDC4/CTSH/ITGA3/GPR4/FGF1/SOX4/PLAG1/TGFBR1/NID1/ALOX15B/TACSTD2/FSTL3/ANXA1/CRLF1/TNC	21	geneontology_Biological_Process	0.0403071	Up
GO:0042063	GO:0042063	gliogenesis	20/521	307/18866	0.000366889	0.013478	0.0111465	E2F1/ETV5/TGFB1/SPINT1/TIAM1/BMERB1/CX3CL1/NAB2/NR1D1/MDK/SOX4/CDH2/PLAG1/TNFRSF21/CSPG4/GAP43/MXRA8/TREM2/ANXA1/ERBB3	20	geneontology_Biological_Process	0.0383877	Up
GO:0034656	GO:0034656	nucleobase-containing small molecule catabolic process	7/521	49/18866	0.000369888	0.013478	0.0111465	ENTPD1/CDA/UPP1/APOBEC3H/ENTPD8/ENTPD2/PNP	7	geneontology_Biological_Process	0.0134357	Up
GO:0010771	GO:0010771	negative regulation of cell morphogenesis involved in differentiation	10/521	98/18866	0.00037642	0.0136036	0.0112504	LRP4/NGEF/SEMA6B/SEMA3F/DRAXIN/WNT3/TRPC5/TACSTD2/POSTN/SPP1	10	geneontology_Biological_Process	0.0191939	Up
GO:0051216	GO:0051216	cartilage development	15/521	197/18866	0.000392146	0.0140567	0.0116251	HMGA2/TGFB1/BMP1/RUNX1/LOXL2/TIMP1/MDK/CD44/COMP/TGFBR1/CHI3L1/TGFBI/ECM1/RUNX2/COL1A1	15	geneontology_Biological_Process	0.0287908	Up
GO:0008360	GO:0008360	regulation of cell shape	13/521	156/18866	0.000400579	0.0142431	0.0117793	PLXND1/FN1/EPS8/CDC42EP1/PLXNC1/ICAM1/CDC42EP5/CDC42EP3/PALM/CCL13/ANXA1/HPN/PLXNA4	13	geneontology_Biological_Process	0.024952	Up
GO:0007528	GO:0007528	neuromuscular junction development	7/521	50/18866	0.000420008	0.0148145	0.0122518	LRP4/ETV5/LRRK2/DOK7/CACNB1/F2R/TNC	7	geneontology_Biological_Process	0.0134357	Up
GO:0051897	GO:0051897	positive regulation of protein kinase B signaling	14/521	178/18866	0.000438409	0.015255	0.0126161	GDF15/TGFA/TGFB1/RASD2/NOX4/CX3CL1/MET/FGF1/C1QTNF12/KL/TGFBR1/CHI3L1/MST1R/ERBB3	14	geneontology_Biological_Process	0.0268714	Up
GO:0032535	GO:0032535	regulation of cellular component size	23/521	383/18866	0.000439416	0.015255	0.0126161	TENM1/NRCAM/SPTBN2/SEMA6B/FN1/SEMA3F/EPS8/TNFRSF12A/DRAXIN/UCN/CDC42EP1/KCNN4/WNT3/CDH4/ICAM1/TRPC5/CDC42EP5/CDC42EP3/TMSB4X/APOE/PLXNA4/CRABP2/SPP1	23	geneontology_Biological_Process	0.0441459	Up
GO:0052548	GO:0052548	regulation of endopeptidase activity	25/521	434/18866	0.000467263	0.0160752	0.0132945	BBC3/BID/PROS1/SPINT1/SERPINA1/CTSH/TIMP1/PCSK1N/SPINK2/NOD1/SFN/PERP/CD44/TNFSF15/F2R/BIRC7/CST5/CST2/CD109/PLAUR/SPOCK1/SPOCK2/SLPI/PMAIP1/CST6	25	geneontology_Biological_Process	0.0479846	Up
GO:0043277	GO:0043277	apoptotic cell clearance	7/521	51/18866	0.000475407	0.0160752	0.0132945	MFGE8/TYRO3/FCN3/TGM2/TREM2/ANXA1/MARCO	7	geneontology_Biological_Process	0.0134357	Up
GO:0050769	GO:0050769	positive regulation of neurogenesis	27/521	485/18866	0.000477866	0.0160752	0.0132945	E2F1/SCN1B/PLXND1/NRCAM/ETV5/TGFB1/SPINT1/TIAM1/FN1/DLG4/CX3CL1/TNFRSF12A/MDK/ITGA3/PLXNC1/GPRC5B/WNT3/CDH4/PLAG1/TRPC5/BRINP1/TREM2/STMN2/APOE/PLXNA4/SYT1/CRABP2	27	geneontology_Biological_Process	0.0518234	Up
GO:0048846	GO:0048846	axon extension involved in axon guidance	6/521	37/18866	0.000483698	0.0160752	0.0132945	SEMA6B/SEMA3F/SLIT1/NRP2/WNT3/PLXNA4	6	geneontology_Biological_Process	0.0115163	Up
GO:1902284	GO:1902284	neuron projection extension involved in neuron projection guidance	6/521	37/18866	0.000483698	0.0160752	0.0132945	SEMA6B/SEMA3F/SLIT1/NRP2/WNT3/PLXNA4	6	geneontology_Biological_Process	0.0115163	Up
GO:0001763	GO:0001763	morphogenesis of a branching structure	15/521	201/18866	0.000484918	0.0160752	0.0132945	PLXND1/COL13A1/ETV5/LRRK2/SPINT1/CITED1/MET/CTSH/ADM/MDK/FGF1/PRDM1/TACSTD2/TGM2/TNC	15	geneontology_Biological_Process	0.0287908	Up
GO:0016485	GO:0016485	protein processing	16/521	223/18866	0.000491904	0.0161851	0.0133853	LRRK2/ECE1/REN/CTSH/KLK13/PCSK1N/PLAU/PERP/COMP/MMP16/BIRC7/PCSK2/SCG5/CTSS/HPN/KLK6	16	geneontology_Biological_Process	0.0307102	Up
GO:0002548	GO:0002548	monocyte chemotaxis	8/521	67/18866	0.000499992	0.0163294	0.0135047	CX3CL1/LGALS3/CXCL17/CCL13/ANXA1/CCL20/CCL17/CCL18	8	geneontology_Biological_Process	0.0153551	Up
GO:0007266	GO:0007266	Rho protein signal transduction	12/521	140/18866	0.000514335	0.0164646	0.0136165	EPS8/MET/ITGA3/ARHGDIB/CDC42EP1/GPR4/RASGRF1/F2R/CDC42EP5/CDC42EP3/RHOV/APOE	12	geneontology_Biological_Process	0.0230326	Up
GO:0001503	GO:0001503	ossification	24/521	412/18866	0.000514572	0.0164646	0.0136165	LRP4/COL13A1/TGFB1/RYR1/BMP1/RUNX1/CITED1/MRC2/PDLIM7/NAB2/MDK/WNT3/KL/COMP/DHRS3/MMP16/ECM1/RUNX2/ALPL/FSTL3/ALOX5/TNC/COL1A1/SPP1	24	geneontology_Biological_Process	0.0460653	Up
GO:0000079	GO:0000079	regulation of cyclin-dependent protein serine/threonine kinase activity	10/521	102/18866	0.000519069	0.0164646	0.0136165	CDKN2B/CCND1/CCND2/CKS2/CDKN2A/SFN/CDKN1A/DIRAS3/CCNA1/CCNP	10	geneontology_Biological_Process	0.0191939	Up
GO:0060840	GO:0060840	artery development	10/521	102/18866	0.000519069	0.0164646	0.0136165	PLXND1/HEY2/STRA6/MDK/ADAMTS9/SOX4/PRDM1/COMP/TGFBR1/APOE	10	geneontology_Biological_Process	0.0191939	Up
GO:0061436	GO:0061436	establishment of skin barrier	5/521	25/18866	0.000529563	0.016552	0.0136888	GRHL3/CLDN1/MET/TMEM79/SFN	5	geneontology_Biological_Process	0.00959693	Up
GO:2001233	GO:2001233	regulation of apoptotic signaling pathway	24/521	413/18866	0.000532569	0.016552	0.0136888	BBC3/E2F1/BID/UNC5B/LRRK2/TPD52L1/CSF2/CX3CL1/CTSH/TNFRSF12A/LGALS3/SFN/ICAM1/CTSC/CD44/TGFBR1/HRK/RNF183/PLAUR/DAPK2/G0S2/PMAIP1/INHBB/MUC1	24	geneontology_Biological_Process	0.0460653	Up
GO:0007159	GO:0007159	leukocyte cell-cell adhesion	22/521	364/18866	0.000533088	0.016552	0.0136888	DPP4/RUNX1/SDC4/MDK/LGALS3/SOX4/ICAM1/CD44/PDE5A/TNFRSF21/IGFBP2/EBI3/LGALS1/CD55/ALOX5/ADTRP/ANXA1/PELI1/PNP/VTCN1/HLA-G/CD177	22	geneontology_Biological_Process	0.0422265	Up
GO:0030593	GO:0030593	neutrophil chemotaxis	10/521	103/18866	0.000560984	0.0172964	0.0143044	DPP4/CX3CL1/DYSF/MDK/LGALS3/CCL13/DAPK2/CCL20/CCL17/CCL18	10	geneontology_Biological_Process	0.0191939	Up
GO:0010811	GO:0010811	positive regulation of cell-substrate adhesion	11/521	122/18866	0.000568969	0.0173006	0.0143079	EDIL3/FN1/AGR2/SDC4/CX3CL1/MDK/ITGA3/NID1/COL8A1/CEACAM6/SPOCK2	11	geneontology_Biological_Process	0.0211132	Up
GO:1990266	GO:1990266	neutrophil migration	11/521	122/18866	0.000568969	0.0173006	0.0143079	DPP4/CX3CL1/DYSF/MDK/LGALS3/CCL13/DAPK2/CCL20/CCL17/CD177/CCL18	11	geneontology_Biological_Process	0.0211132	Up
GO:0010466	GO:0010466	negative regulation of peptidase activity	18/521	272/18866	0.000591112	0.0178508	0.0147629	PROS1/SPINT1/SERPINA1/TIMP1/PCSK1N/SPINK2/SFN/CD44/BIRC7/ECM1/CST5/CST2/CD109/PLAUR/SPOCK1/SPOCK2/SLPI/CST6	18	geneontology_Biological_Process	0.0345489	Up
GO:0097756	GO:0097756	negative regulation of blood vessel diameter	9/521	86/18866	0.000607801	0.0180766	0.0149497	ADORA1/ADRA1B/ECE1/HRH1/ADM/ICAM1/COMP/F2R/APLN	9	geneontology_Biological_Process	0.0172745	Up
GO:0002695	GO:0002695	negative regulation of leukocyte activation	14/521	184/18866	0.00061089	0.0180766	0.0149497	ABR/RUNX1/SDC4/CX3CL1/TYRO3/NR1D1/MDK/LGALS3/PDE5A/TNFRSF21/ANXA1/PELI1/VTCN1/HLA-G	14	geneontology_Biological_Process	0.0268714	Up
GO:0007416	GO:0007416	synapse assembly	14/521	184/18866	0.00061089	0.0180766	0.0149497	LRP4/GABRB2/PLXND1/NRCAM/SPTBN2/EPHB3/SLIT1/AMIGO2/IL1RAP/CDH2/GAP43/CBLN1/SDK1/SPOCK2	14	geneontology_Biological_Process	0.0268714	Up
GO:0034612	GO:0034612	response to tumor necrosis factor	20/521	320/18866	0.000620831	0.0182483	0.0150916	CLDN1/CX3CL1/TNFRSF12A/NR1D1/LCN2/DCSTAMP/EDA2R/CLIP3/ICAM1/CHI3L1/TNFSF15/TNFRSF21/GGT2/TMSB4X/CCL13/CCL20/POSTN/CCL17/COL1A1/CCL18	20	geneontology_Biological_Process	0.0383877	Up
GO:0071356	GO:0071356	cellular response to tumor necrosis factor	19/521	297/18866	0.000636354	0.0184687	0.0152739	CLDN1/CX3CL1/TNFRSF12A/NR1D1/LCN2/DCSTAMP/EDA2R/CLIP3/ICAM1/CHI3L1/TNFSF15/TNFRSF21/TMSB4X/CCL13/CCL20/POSTN/CCL17/COL1A1/CCL18	19	geneontology_Biological_Process	0.0364683	Up
GO:1900739	GO:1900739	regulation of protein insertion into mitochondrial membrane involved in apoptotic signaling pathway	5/521	26/18866	0.000640897	0.0184687	0.0152739	BBC3/E2F1/BID/SFN/PMAIP1	5	geneontology_Biological_Process	0.00959693	Up
GO:1900740	GO:1900740	positive regulation of protein insertion into mitochondrial membrane involved in apoptotic signaling pathway	5/521	26/18866	0.000640897	0.0184687	0.0152739	BBC3/E2F1/BID/SFN/PMAIP1	5	geneontology_Biological_Process	0.00959693	Up
GO:0031960	GO:0031960	response to corticosteroid	13/521	164/18866	0.000645273	0.0184741	0.0152784	CLDN1/CCND1/UCN/ADM/MDK/CDKN1A/ICAM1/SSTR3/IGFBP2/TRIM63/ALPL/ANXA1/COL1A1	13	geneontology_Biological_Process	0.024952	Up
GO:0006721	GO:0006721	terpenoid metabolic process	11/521	124/18866	0.000652724	0.0185668	0.0153551	STRA6/SDC4/LPL/CYP2S1/ALDH1A3/SDC3/RDH5/DHRS3/CYP1B1/APOE/CRABP2	11	geneontology_Biological_Process	0.0211132	Up
GO:0050866	GO:0050866	negative regulation of cell activation	15/521	207/18866	0.000658987	0.0185992	0.0153818	ABR/RUNX1/SDC4/CX3CL1/TYRO3/NR1D1/MDK/LGALS3/PDE5A/TNFRSF21/ANXA1/PELI1/APOE/VTCN1/HLA-G	15	geneontology_Biological_Process	0.0287908	Up
GO:0006720	GO:0006720	isoprenoid metabolic process	12/521	144/18866	0.000662297	0.0185992	0.0153818	NPC2/STRA6/SDC4/LPL/CYP2S1/ALDH1A3/SDC3/RDH5/DHRS3/CYP1B1/APOE/CRABP2	12	geneontology_Biological_Process	0.0230326	Up
GO:0007218	GO:0007218	neuropeptide signaling pathway	10/521	106/18866	0.000703861	0.0196413	0.0162437	TENM1/GLRB/TYRO3/UCN/PCSK1N/CYSLTR2/NMU/SSTR3/SCG5/NPW	10	geneontology_Biological_Process	0.0191939	Up
GO:0033627	GO:0033627	cell adhesion mediated by integrin	8/521	71/18866	0.000740857	0.0205436	0.0169899	DPP4/TESC/ITGA2/PLAU/ICAM1/ITGB4/CYP1B1/MUC1	8	geneontology_Biological_Process	0.0153551	Up
GO:0060350	GO:0060350	endochondral bone morphogenesis	7/521	55/18866	0.000757876	0.0208842	0.0172716	COL13A1/NAB2/COMP/MMP16/RUNX2/ALPL/COL1A1	7	geneontology_Biological_Process	0.0134357	Up
GO:0018108	GO:0018108	peptidyl-tyrosine phosphorylation	22/521	374/18866	0.000763841	0.0209179	0.0172994	SRCIN1/LRP4/ADORA1/TGFA/EPHB3/TGFB1/NOX4/DLG4/MVP/CSF2/MET/TYRO3/EPHA10/DOK7/GPRC5B/ICAM1/CD44/CSPG4/MST1R/TREM2/CRLF1/ERBB3	22	geneontology_Biological_Process	0.0422265	Up
GO:0051384	GO:0051384	response to glucocorticoid	12/521	147/18866	0.000795349	0.0212578	0.0175805	CLDN1/CCND1/UCN/ADM/MDK/CDKN1A/ICAM1/SSTR3/IGFBP2/TRIM63/ALPL/ANXA1	12	geneontology_Biological_Process	0.0230326	Up
GO:0050727	GO:0050727	regulation of inflammatory response	24/521	425/18866	0.000795464	0.0212578	0.0175805	ABR/ADORA1/LRRK2/CX3CL1/TYRO3/STING1/LPL/ITGA2/NR1D1/MDK/FNDC4/GPR4/C1QTNF12/GPRC5B/CXCL17/CTSC/TGM2/C2CD4A/GGT2/TMSB4X/ALOX5/TREM2/ANXA1/APOE	24	geneontology_Biological_Process	0.0460653	Up
GO:0070555	GO:0070555	response to interleukin-1	15/521	211/18866	0.000802467	0.0212578	0.0175805	CITED1/CX3CL1/NR1D1/LCN2/IL1RAP/NOD1/ICAM1/CHI3L1/TRIM63/CCL13/ANXA1/PELI1/CCL20/CCL17/CCL18	15	geneontology_Biological_Process	0.0287908	Up
GO:0048012	GO:0048012	hepatocyte growth factor receptor signaling pathway	4/521	16/18866	0.000803271	0.0212578	0.0175805	MET/ESM1/MST1R/HPN	4	geneontology_Biological_Process	0.00767754	Up
GO:0048521	GO:0048521	negative regulation of behavior	4/521	16/18866	0.000803271	0.0212578	0.0175805	ADORA1/UCN/NMU/RETN	4	geneontology_Biological_Process	0.00767754	Up
GO:1903522	GO:1903522	regulation of blood circulation	19/521	303/18866	0.000809071	0.0212578	0.0175805	SCN1B/ADORA1/HEY2/RYR1/ADRA1B/HCN4/KCNJ2/ECE1/HRH1/SREBF1/UCN/ADM/NMU/ICAM1/PDE5A/CACNB1/F2R/APLN/CACNG4	19	geneontology_Biological_Process	0.0364683	Up
GO:0002062	GO:0002062	chondrocyte differentiation	10/521	108/18866	0.000814825	0.0212578	0.0175805	HMGA2/TGFB1/RUNX1/LOXL2/MDK/COMP/TGFBR1/TGFBI/ECM1/RUNX2	10	geneontology_Biological_Process	0.0191939	Up
GO:0032526	GO:0032526	response to retinoic acid	10/521	108/18866	0.000814825	0.0212578	0.0175805	RXRG/GJB3/CTSH/TESC/SREBF1/WNT3/BRINP1/IGFBP2/TNC/COL1A1	10	geneontology_Biological_Process	0.0191939	Up
GO:0050708	GO:0050708	regulation of protein secretion	21/521	352/18866	0.000835187	0.0216144	0.0178755	SRCIN1/DPP4/TGFB1/TIAM1/BAIAP3/SREBF1/NR1D1/SOX4/KCNN4/C1QTNF12/NMU/KCNS3/F2R/ADCY8/ALOX5/TREM2/ADTRP/ARNTL/ANXA1/APOE/INHBB	21	geneontology_Biological_Process	0.0403071	Up
GO:1901215	GO:1901215	negative regulation of neuron death	15/521	212/18866	0.000842215	0.0216144	0.0178755	GABRB2/UNC5B/LRRK2/CITED1/CX3CL1/TYRO3/DRAXIN/UCN/MDK/VSTM2L/F2R/APOE/FOXQ1/CRLF1/ERBB3	15	geneontology_Biological_Process	0.0287908	Up
GO:0043113	GO:0043113	receptor clustering	7/521	56/18866	0.000845868	0.0216144	0.0178755	LRP4/ETV5/DLG4/GLRB/CDH2/SHISA6/APOE	7	geneontology_Biological_Process	0.0134357	Up
GO:0018212	GO:0018212	peptidyl-tyrosine modification	22/521	377/18866	0.000848104	0.0216144	0.0178755	SRCIN1/LRP4/ADORA1/TGFA/EPHB3/TGFB1/NOX4/DLG4/MVP/CSF2/MET/TYRO3/EPHA10/DOK7/GPRC5B/ICAM1/CD44/CSPG4/MST1R/TREM2/CRLF1/ERBB3	22	geneontology_Biological_Process	0.0422265	Up
GO:0050673	GO:0050673	epithelial cell proliferation	25/521	453/18866	0.000865679	0.0218124	0.0180392	CDH3/CDKN2B/TGFA/TGFB1/CLDN1/CCND1/LOXL2/LRG1/DYSF/NR1D1/MDK/NRP2/FGF1/SFN/TGFBR1/TACSTD2/COL8A1/APLN/ECM1/APLNR/CD109/ALOX5/APOE/HPN/COL8A2	25	geneontology_Biological_Process	0.0479846	Up
GO:0048638	GO:0048638	regulation of developmental growth	21/521	353/18866	0.000865768	0.0218124	0.0180392	GDF15/NRCAM/HEY2/SEMA6B/DUSP6/FN1/SEMA3F/AGR2/TNFRSF12A/DRAXIN/PHLDA2/WNT3/CDH4/CDKN1A/TRPC5/TGFBR1/APOE/PLXNA4/SYT1/CRABP2/SPP1	21	geneontology_Biological_Process	0.0403071	Up
GO:0010951	GO:0010951	negative regulation of endopeptidase activity	17/521	258/18866	0.000871654	0.0218359	0.0180587	PROS1/SPINT1/SERPINA1/TIMP1/PCSK1N/SPINK2/SFN/CD44/BIRC7/CST5/CST2/CD109/PLAUR/SPOCK1/SPOCK2/SLPI/CST6	17	geneontology_Biological_Process	0.0326296	Up
GO:0022408	GO:0022408	negative regulation of cell-cell adhesion	14/521	191/18866	0.0008818	0.0218869	0.0181009	TGFB1/FXYD5/RUNX1/SDC4/MDK/LGALS3/MUC21/PDE5A/TNFRSF21/ADTRP/ANXA1/PELI1/VTCN1/HLA-G	14	geneontology_Biological_Process	0.0268714	Up
GO:0090276	GO:0090276	regulation of peptide hormone secretion	15/521	213/18866	0.000883618	0.0218869	0.0181009	DPP4/TIAM1/BAIAP3/SREBF1/UCN/NR1D1/SOX4/C1QTNF12/NMU/KCNS3/APLN/ADCY8/ALOX5/ARNTL/INHBB	15	geneontology_Biological_Process	0.0287908	Up
GO:0031069	GO:0031069	hair follicle morphogenesis	5/521	28/18866	0.000914983	0.0221657	0.0183314	TMEM79/WNT10A/FOXQ1/KRT27/KRT17	5	geneontology_Biological_Process	0.00959693	Up
GO:0031645	GO:0031645	negative regulation of nervous system process	5/521	28/18866	0.000914983	0.0221657	0.0183314	LRRK2/CELF4/CTSC/TNFRSF21/CBLN1	5	geneontology_Biological_Process	0.00959693	Up
GO:0033561	GO:0033561	regulation of water loss via skin	5/521	28/18866	0.000914983	0.0221657	0.0183314	GRHL3/CLDN1/MET/TMEM79/SFN	5	geneontology_Biological_Process	0.00959693	Up
GO:0090200	GO:0090200	positive regulation of release of cytochrome c from mitochondria	5/521	28/18866	0.000914983	0.0221657	0.0183314	BBC3/BID/HRK/PLAUR/PMAIP1	5	geneontology_Biological_Process	0.00959693	Up
GO:0045666	GO:0045666	positive regulation of neuron differentiation	22/521	380/18866	0.000940289	0.0226543	0.0187355	SCN1B/PLXND1/NRCAM/ETV5/TIAM1/FN1/DLG4/CX3CL1/TNFRSF12A/MDK/ITGA3/PLXNC1/GPRC5B/WNT3/CDH4/TRPC5/BRINP1/STMN2/APOE/PLXNA4/SYT1/CRABP2	22	geneontology_Biological_Process	0.0422265	Up
GO:0030307	GO:0030307	positive regulation of cell growth	13/521	171/18866	0.000952925	0.0228339	0.018884	FN1/TNFRSF12A/UCN/WNT3/SFN/CDH4/PRSS2/TRPC5/TGFBR1/HPN/SYT1/KRT17/CRABP2	13	geneontology_Biological_Process	0.024952	Up
GO:0070374	GO:0070374	positive regulation of ERK1 and ERK2 cascade	15/521	215/18866	0.000971614	0.0231559	0.0191503	TGFB1/NOX4/CX3CL1/NOD1/ICAM1/CD44/CHI3L1/F2R/TREM2/CCL13/APOE/CCL20/CCL17/MARCO/CCL18	15	geneontology_Biological_Process	0.0287908	Up
GO:0006022	GO:0006022	aminoglycan metabolic process	13/521	172/18866	0.00100555	0.0238358	0.0197126	TGFB1/B3GNT7/B3GNT8/SDC4/B3GNT3/CHST2/B3GAT1/SDC3/CD44/CHI3L1/CSPG4/SPOCK2/HS6ST2	13	geneontology_Biological_Process	0.024952	Up
GO:0043117	GO:0043117	positive regulation of vascular permeability	4/521	17/18866	0.00102765	0.0241006	0.0199316	PTP4A3/TGFB1/UCN/APOE	4	geneontology_Biological_Process	0.00767754	Up
GO:0098962	GO:0098962	regulation of postsynaptic neurotransmitter receptor activity	4/521	17/18866	0.00102765	0.0241006	0.0199316	NPTXR/NPTX2/CACNG4/SHISA6	4	geneontology_Biological_Process	0.00767754	Up
GO:0001837	GO:0001837	epithelial to mesenchymal transition	12/521	152/18866	0.00106645	0.0247167	0.0204411	HMGA2/HEY2/TGFB1/TIAM1/LOXL2/MDK/IL17RD/TGFBR1/VASN/HPN/TMEM100/COL1A1	12	geneontology_Biological_Process	0.0230326	Up
GO:0061097	GO:0061097	regulation of protein tyrosine kinase activity	9/521	93/18866	0.00107287	0.0247167	0.0204411	SRCIN1/ADORA1/TGFA/NOX4/DLG4/MVP/DOK7/GPRC5B/ERBB3	9	geneontology_Biological_Process	0.0172745	Up
GO:1903035	GO:1903035	negative regulation of response to wounding	9/521	93/18866	0.00107287	0.0247167	0.0204411	PROS1/MDK/PLAU/CD109/PLAUR/ALOX5/ADTRP/APOE/SPP1	9	geneontology_Biological_Process	0.0172745	Up
GO:0050730	GO:0050730	regulation of peptidyl-tyrosine phosphorylation	17/521	263/18866	0.00107635	0.0247167	0.0204411	SRCIN1/LRP4/ADORA1/TGFA/TGFB1/NOX4/DLG4/MVP/CSF2/DOK7/GPRC5B/ICAM1/CD44/CSPG4/TREM2/CRLF1/ERBB3	17	geneontology_Biological_Process	0.0326296	Up
GO:0042476	GO:0042476	odontogenesis	11/521	132/18866	0.00109723	0.0249397	0.0206255	LRP4/JAG2/ADM/PERP/FAM20A/RUNX2/ALPL/WNT10A/TNC/COL1A1/AQP5	11	geneontology_Biological_Process	0.0211132	Up
GO:0060326	GO:0060326	cell chemotaxis	19/521	311/18866	0.00110095	0.0249397	0.0206255	DPP4/TIAM1/CX3CL1/MET/HRH1/DYSF/MDK/LGALS3/FGF1/CXCL17/TMSB4X/ALOX5/CCL13/ANXA1/DAPK2/CCL20/CCL17/CCL18/CXCL14	19	geneontology_Biological_Process	0.0364683	Up
GO:0045823	GO:0045823	positive regulation of heart contraction	6/521	43/18866	0.00110302	0.0249397	0.0206255	HEY2/ADRA1B/UCN/ADM/NMU/APLN	6	geneontology_Biological_Process	0.0115163	Up
GO:0033555	GO:0033555	multicellular organismal response to stress	8/521	76/18866	0.00116466	0.0261989	0.0216669	DPP4/LPAR5/UCN/MDK/GJA4/VWA1/BRINP1/APOE	8	geneontology_Biological_Process	0.0153551	Up
GO:0010976	GO:0010976	positive regulation of neuron projection development	18/521	290/18866	0.00123357	0.0274686	0.022717	SCN1B/PLXND1/TIAM1/FN1/DLG4/CX3CL1/TNFRSF12A/MDK/ITGA3/PLXNC1/WNT3/CDH4/TRPC5/STMN2/APOE/PLXNA4/SYT1/CRABP2	18	geneontology_Biological_Process	0.0345489	Up
GO:0060485	GO:0060485	mesenchyme development	18/521	290/18866	0.00123357	0.0274686	0.022717	HMGA2/HEY2/TGFB1/TIAM1/SEMA6B/FN1/SEMA3F/LOXL2/MDK/NRP2/IL17RD/TGFBR1/VASN/WNT10A/HPN/ERBB3/TMEM100/COL1A1	18	geneontology_Biological_Process	0.0345489	Up
GO:0007626	GO:0007626	locomotory behavior	14/521	198/18866	0.00124764	0.0275087	0.0227502	DPP4/ETV5/LRRK2/RASD2/DLG4/EPS8/GLRB/PPP1R1B/ALDH1A3/ESPN/C1QL1/ADCY8/DMBX1/APOE	14	geneontology_Biological_Process	0.0268714	Up
GO:0044060	GO:0044060	regulation of endocrine process	6/521	44/18866	0.00124784	0.0275087	0.0227502	REN/UCN/F2R/APLN/RETN/INHBB	6	geneontology_Biological_Process	0.0115163	Up
GO:0001844	GO:0001844	protein insertion into mitochondrial membrane involved in apoptotic signaling pathway	5/521	30/18866	0.00126784	0.0275596	0.0227923	BBC3/E2F1/BID/SFN/PMAIP1	5	geneontology_Biological_Process	0.00959693	Up
GO:0031669	GO:0031669	cellular response to nutrient levels	15/521	221/18866	0.00128128	0.0275596	0.0227923	CDKN2B/LRRK2/UPP1/XPR1/SREBF1/LPL/LCN2/CDKN1A/ICAM1/TNC/POSTN/AOC1/PMAIP1/INHBB/COL1A1	15	geneontology_Biological_Process	0.0287908	Up
GO:0042445	GO:0042445	hormone metabolic process	15/521	221/18866	0.00128128	0.0275596	0.0227923	ECE1/REN/PCSK1N/ADM/CYP2S1/ALDH1A3/RDH5/DHRS3/PCSK2/SCG5/CYP1B1/HPN/KLK6/CRABP2/SPP1	15	geneontology_Biological_Process	0.0287908	Up
GO:0001836	GO:0001836	release of cytochrome c from mitochondria	7/521	60/18866	0.00128141	0.0275596	0.0227923	BBC3/BID/GGCT/SFN/HRK/PLAUR/PMAIP1	7	geneontology_Biological_Process	0.0134357	Up
GO:0019229	GO:0019229	regulation of vasoconstriction	7/521	60/18866	0.00128141	0.0275596	0.0227923	ADRA1B/ECE1/HRH1/ADM/ICAM1/F2R/APLN	7	geneontology_Biological_Process	0.0134357	Up
GO:0001890	GO:0001890	placenta development	12/521	156/18866	0.00133502	0.0284423	0.0235223	GJB3/PLCD3/HEY2/SPINT1/CITED1/CSF2/ADM/MDFI/PHLDA2/PRDM1/KRT19/SPP1	12	geneontology_Biological_Process	0.0230326	Up
GO:0097529	GO:0097529	myeloid leukocyte migration	15/521	222/18866	0.0013402	0.0284423	0.0235223	DPP4/CX3CL1/HRH1/DYSF/MDK/LGALS3/CXCL17/TREM2/CCL13/ANXA1/DAPK2/CCL20/CCL17/CD177/CCL18	15	geneontology_Biological_Process	0.0287908	Up
GO:0051402	GO:0051402	neuron apoptotic process	16/521	245/18866	0.0013418	0.0284423	0.0235223	GABRB2/BID/UNC5B/CITED1/CX3CL1/TYRO3/DRAXIN/MDK/VSTM2L/TNFRSF21/F2R/GRM4/APOE/FOXQ1/CRLF1/ERBB3	16	geneontology_Biological_Process	0.0307102	Up
GO:0042310	GO:0042310	vasoconstriction	8/521	78/18866	0.00138049	0.0289253	0.0239217	ADRA1B/ECE1/HRH1/ADM/ICAM1/COMP/F2R/APLN	8	geneontology_Biological_Process	0.0153551	Up
GO:0072332	GO:0072332	intrinsic apoptotic signaling pathway by p53 class mediator	8/521	78/18866	0.00138049	0.0289253	0.0239217	PHLDA3/E2F1/EDA2R/CDKN1A/PERP/CD44/PMAIP1/MUC1	8	geneontology_Biological_Process	0.0153551	Up
GO:0051604	GO:0051604	protein maturation	18/521	293/18866	0.00138427	0.0289253	0.0239217	LRRK2/ECE1/REN/CTSH/TESC/KLK13/PCSK1N/PLAU/SOX4/PERP/COMP/MMP16/BIRC7/PCSK2/SCG5/CTSS/HPN/KLK6	18	geneontology_Biological_Process	0.0345489	Up
GO:0048732	GO:0048732	gland development	24/521	443/18866	0.00139905	0.0290964	0.0240632	PLXND1/EPHB3/ETV5/TGFB1/CLDN1/CCND1/STRA6/MET/ITGA2/MDK/ALDH1A3/FGF1/WNT3/PLAG1/TGFBR1/ALOX15B/APLN/TGM2/FSTL3/ELF3/WNT10A/ANXA1/HPN/TNC	24	geneontology_Biological_Process	0.0460653	Up
GO:0051098	GO:0051098	regulation of binding	21/521	367/18866	0.00140667	0.0291174	0.0240806	E2F1/HMGA2/PLXND1/CDT1/HEY2/TGFB1/LRRK2/TIAM1/MET/STING1/ITGA2/MDFI/PHLDA2/CDKN1A/TGFBR1/TMSB4X/PLAUR/APOE/SLPI/RAMP1/PRMT8	21	geneontology_Biological_Process	0.0403071	Up
GO:0071674	GO:0071674	mononuclear cell migration	9/521	97/18866	0.00144706	0.0298134	0.0246562	CX3CL1/MDK/LGALS3/CXCL17/CCL13/ANXA1/CCL20/CCL17/CCL18	9	geneontology_Biological_Process	0.0172745	Up
GO:0099068	GO:0099068	postsynapse assembly	5/521	31/18866	0.00147776	0.0302995	0.0250582	LRP4/IL1RAP/CDH2/GAP43/CBLN1	5	geneontology_Biological_Process	0.00959693	Up
GO:1903038	GO:1903038	negative regulation of leukocyte cell-cell adhesion	11/521	137/18866	0.00148439	0.0302995	0.0250582	RUNX1/SDC4/MDK/LGALS3/PDE5A/TNFRSF21/ADTRP/ANXA1/PELI1/VTCN1/HLA-G	11	geneontology_Biological_Process	0.0211132	Up
GO:0042246	GO:0042246	tissue regeneration	8/521	79/18866	0.00149971	0.030471	0.0252	DYSF/MDK/CDKN1A/GAP43/TM4SF4/ANXA1/KLK6/POSTN	8	geneontology_Biological_Process	0.0153551	Up
GO:0072676	GO:0072676	lymphocyte migration	10/521	117/18866	0.00150674	0.0304734	0.025202	CX3CL1/ICAM1/ECM1/ADTRP/CCL13/CCL20/CCL17/MYO1G/CCL18/CXCL14	10	geneontology_Biological_Process	0.0191939	Up
GO:0031424	GO:0031424	keratinization	15/521	225/18866	0.00153077	0.0308181	0.0254871	CDH3/CNFN/TMEM79/KRT15/KLK13/EVPL/SFN/PERP/KRT80/IVL/KRT27/KRT19/KRT17/DSC3/KLK12	15	geneontology_Biological_Process	0.0287908	Up
GO:0050678	GO:0050678	regulation of epithelial cell proliferation	22/521	395/18866	0.00154231	0.0309094	0.0255626	CDH3/CDKN2B/TGFA/TGFB1/CLDN1/CCND1/LRG1/DYSF/NR1D1/MDK/NRP2/FGF1/SFN/TGFBR1/TACSTD2/APLN/ECM1/APLNR/CD109/ALOX5/APOE/HPN	22	geneontology_Biological_Process	0.0422265	Up
GO:1903975	GO:1903975	regulation of glial cell migration	4/521	19/18866	0.0016019	0.0319078	0.0263883	TIAM1/BMERB1/CX3CL1/TREM2	4	geneontology_Biological_Process	0.00767754	Up
GO:0050868	GO:0050868	negative regulation of T cell activation	10/521	118/18866	0.00160661	0.0319078	0.0263883	RUNX1/SDC4/MDK/LGALS3/PDE5A/TNFRSF21/ANXA1/PELI1/VTCN1/HLA-G	10	geneontology_Biological_Process	0.0191939	Up
GO:0010717	GO:0010717	regulation of epithelial to mesenchymal transition	9/521	99/18866	0.00167	0.0330181	0.0273065	TGFB1/TIAM1/LOXL2/MDK/IL17RD/TGFBR1/VASN/HPN/COL1A1	9	geneontology_Biological_Process	0.0172745	Up
GO:0048730	GO:0048730	epidermis morphogenesis	5/521	32/18866	0.00171218	0.0337008	0.0278711	TMEM79/WNT10A/FOXQ1/KRT27/KRT17	5	geneontology_Biological_Process	0.00959693	Up
GO:1903034	GO:1903034	regulation of response to wounding	13/521	183/18866	0.00176316	0.0345384	0.0285638	PROS1/CLDN1/TNFRSF12A/MDK/PLAU/F2R/CD109/PLAUR/ALOX5/ADTRP/ANXA1/APOE/SPP1	13	geneontology_Biological_Process	0.024952	Up
GO:0050919	GO:0050919	negative chemotaxis	6/521	47/18866	0.0017704	0.0345384	0.0285638	DPP4/SEMA6B/SEMA3F/SLIT1/NRP2/PLXNA4	6	geneontology_Biological_Process	0.0115163	Up
GO:0051896	GO:0051896	regulation of protein kinase B signaling	16/521	253/18866	0.00186595	0.0362421	0.0299728	PHLDA3/GDF15/TGFA/TGFB1/RASD2/NOX4/CX3CL1/MET/FGF1/C1QTNF12/KL/TGFBR1/CHI3L1/MST1R/ERBB3/HLA-G	16	geneontology_Biological_Process	0.0307102	Up
GO:0007160	GO:0007160	cell-matrix adhesion	15/521	230/18866	0.00189867	0.036716	0.0303647	COL13A1/TIAM1/FN1/SDC4/CX3CL1/ITGA2/PLAU/ADAMTS9/ITGA3/CDKN2A/CD44/NID1/ITGB4/CEACAM6/POSTN	15	geneontology_Biological_Process	0.0287908	Up
GO:0002687	GO:0002687	positive regulation of leukocyte migration	11/521	142/18866	0.00197694	0.0377401	0.0312117	CX3CL1/DYSF/ITGA2/MDK/LGALS3/ICAM1/CXCL17/TREM2/DAPK2/CCL20/CXCL14	11	geneontology_Biological_Process	0.0211132	Up
GO:0001667	GO:0001667	ameboidal-type cell migration	25/521	481/18866	0.00197731	0.0377401	0.0312117	PTP4A3/PLXND1/DPP4/TGFB1/SEMA6B/FN1/SEMA3F/SDC4/MET/LOXL2/CTSH/TIMP1/ITGA2/ADAMTS9/NRP2/ITGA3/ARHGDIB/FGF1/TGFBR1/TACSTD2/CYP1B1/TMSB4X/ADTRP/ANXA1/APOE	25	geneontology_Biological_Process	0.0479846	Up
GO:0043087	GO:0043087	regulation of GTPase activity	25/521	481/18866	0.00197731	0.0377401	0.0312117	ABR/NGEF/PLXND1/GRHL3/EPHB3/LRRK2/RIN1/TIAM1/ARHGAP23/CX3CL1/TBC1D2/ARHGAP36/ARHGDIB/RASGRF1/PLXNC1/SIPA1L2/ICAM1/F2R/DOCK9/CCL13/CCL20/PLXNA4/CCL17/DEPDC1B/CCL18	25	geneontology_Biological_Process	0.0479846	Up
GO:0030595	GO:0030595	leukocyte chemotaxis	15/521	232/18866	0.00206515	0.0392086	0.0324262	DPP4/CX3CL1/HRH1/DYSF/MDK/LGALS3/CXCL17/ALOX5/CCL13/ANXA1/DAPK2/CCL20/CCL17/CCL18/CXCL14	15	geneontology_Biological_Process	0.0287908	Up
GO:0009612	GO:0009612	response to mechanical stimulus	14/521	209/18866	0.00207437	0.0392086	0.0324262	SCEL/KCNJ2/STRA6/UCN/ITGA2/MDK/CHI3L1/IGFBP2/RETN/HPN/TNC/POSTN/MMP7/COL1A1	14	geneontology_Biological_Process	0.0268714	Up
GO:0035296	GO:0035296	regulation of tube diameter	11/521	143/18866	0.00208982	0.0392086	0.0324262	ADORA1/ADRA1B/ECE1/HRH1/UCN/ADM/ICAM1/COMP/F2R/APLN/APOE	11	geneontology_Biological_Process	0.0211132	Up
GO:0097746	GO:0097746	regulation of blood vessel diameter	11/521	143/18866	0.00208982	0.0392086	0.0324262	ADORA1/ADRA1B/ECE1/HRH1/UCN/ADM/ICAM1/COMP/F2R/APLN/APOE	11	geneontology_Biological_Process	0.0211132	Up
GO:0032970	GO:0032970	regulation of actin filament-based process	22/521	405/18866	0.00210568	0.0393387	0.0325337	ADORA1/TENM1/GRHL3/SPTBN2/FHOD1/HCN4/KCNJ2/NOX4/EPS8/SDC4/CX3CL1/MET/MDK/ARHGDIB/CDC42EP1/ICAM1/SIGLEC15/TGFBR1/TACSTD2/CDC42EP5/CDC42EP3/TMSB4X	22	geneontology_Biological_Process	0.0422265	Up
GO:0042756	GO:0042756	drinking behavior	3/521	10/18866	0.00217378	0.0404397	0.0334443	REN/UCN/APLN	3	geneontology_Biological_Process	0.00575816	Up
GO:0030072	GO:0030072	peptide hormone secretion	16/521	257/18866	0.00218645	0.0405045	0.0334979	DPP4/TIAM1/BAIAP3/SREBF1/UCN/NR1D1/SOX4/C1QTNF12/NMU/KCNS3/APLN/ADCY8/ALOX5/ARNTL/ANXA1/INHBB	16	geneontology_Biological_Process	0.0307102	Up
GO:0035150	GO:0035150	regulation of tube size	11/521	144/18866	0.00220789	0.0405607	0.0335444	ADORA1/ADRA1B/ECE1/HRH1/UCN/ADM/ICAM1/COMP/F2R/APLN/APOE	11	geneontology_Biological_Process	0.0211132	Up
GO:0050921	GO:0050921	positive regulation of chemotaxis	11/521	144/18866	0.00220789	0.0405607	0.0335444	TGFB1/TIAM1/MET/DYSF/ITGA2/MDK/CXCL17/TMSB4X/TREM2/DAPK2/CXCL14	11	geneontology_Biological_Process	0.0211132	Up
GO:0097061	GO:0097061	dendritic spine organization	8/521	84/18866	0.00222367	0.0406812	0.0336441	SRCIN1/NGEF/EPHB3/LRRK2/TIAM1/DLG4/ITGA3/APOE	8	geneontology_Biological_Process	0.0153551	Up
GO:0002237	GO:0002237	response to molecule of bacterial origin	20/521	356/18866	0.00224079	0.0406859	0.0336479	ABR/TGFB1/CLDN1/CITED1/REN/CSF2/CX3CL1/IRF5/NR1D1/ADM/LCN2/ICAM1/F2R/INAVA/ALPL/CD55/GGT2/TREM2/PELI1/SLPI	20	geneontology_Biological_Process	0.0383877	Up
GO:0032102	GO:0032102	negative regulation of response to external stimulus	23/521	433/18866	0.00224238	0.0406859	0.0336479	ABR/ADORA1/DPP4/PROS1/SEMA6B/SEMA3F/CX3CL1/TYRO3/UCN/NR1D1/MDK/PLAU/FNDC4/C1QTNF12/WNT3/CXCL17/CD109/PLAUR/ALOX5/ADTRP/APOE/HLA-G/SPP1	23	geneontology_Biological_Process	0.0441459	Up
GO:0050679	GO:0050679	positive regulation of epithelial cell proliferation	14/521	211/18866	0.00226498	0.0409116	0.0338345	CDH3/TGFA/CLDN1/CCND1/LRG1/DYSF/MDK/NRP2/FGF1/TGFBR1/APLN/ECM1/APLNR/HPN	14	geneontology_Biological_Process	0.0268714	Up
GO:0071559	GO:0071559	response to transforming growth factor beta	16/521	258/18866	0.00227338	0.0409116	0.0338345	GDF15/CDKN2B/TGFB1/CLDN1/NOX4/CITED1/LRG1/ITGA3/FNDC4/IL17RD/TGFBR1/VASN/CD109/WNT10A/POSTN/COL1A1	16	geneontology_Biological_Process	0.0307102	Up
GO:0022612	GO:0022612	gland morphogenesis	10/521	124/18866	0.00232441	0.0415342	0.0343494	PLXND1/ETV5/TGFB1/MDK/FGF1/PLAG1/TGM2/ELF3/HPN/TNC	10	geneontology_Biological_Process	0.0191939	Up
GO:1903039	GO:1903039	positive regulation of leukocyte cell-cell adhesion	15/521	235/18866	0.0023375	0.0415342	0.0343494	DPP4/RUNX1/MDK/SOX4/ICAM1/CD44/IGFBP2/EBI3/LGALS1/CD55/ALOX5/ANXA1/PNP/VTCN1/HLA-G	15	geneontology_Biological_Process	0.0287908	Up
GO:0001701	GO:0001701	in utero embryonic development	21/521	383/18866	0.002356	0.0415342	0.0343494	GJB3/PLCD3/JAG2/HEY2/SPINT1/CITED1/CELF4/ASF1B/CSF2/ADM/CMTM3/SLC34A2/MDFI/PHLDA2/PRDM1/TGFBR1/ELF3/ATP11A/KRT19/DSC3/TMEM100	21	geneontology_Biological_Process	0.0403071	Up
GO:0051701	GO:0051701	interaction with host	14/521	212/18866	0.00236558	0.0415342	0.0343494	NECTIN4/DPP4/CLDN1/MET/TYRO3/CLDN9/XPR1/ITGA2/PC/ICAM1/FCN3/SLC1A5/LGALS1/CD55	14	geneontology_Biological_Process	0.0268714	Up
GO:0010893	GO:0010893	positive regulation of steroid biosynthetic process	4/521	21/18866	0.00236776	0.0415342	0.0343494	SREBF1/NR1D1/ADM/FGF1	4	geneontology_Biological_Process	0.00767754	Up
GO:0048485	GO:0048485	sympathetic nervous system development	4/521	21/18866	0.00236776	0.0415342	0.0343494	SEMA3F/NRP2/SOX4/PLXNA4	4	geneontology_Biological_Process	0.00767754	Up
GO:0042129	GO:0042129	regulation of T cell proliferation	12/521	167/18866	0.00237392	0.0415342	0.0343494	SDC4/LGALS3/PDE5A/TNFRSF21/IGFBP2/EBI3/CD55/ANXA1/PELI1/PNP/VTCN1/HLA-G	12	geneontology_Biological_Process	0.0230326	Up
GO:0009306	GO:0009306	protein secretion	24/521	462/18866	0.00242793	0.0418007	0.0345699	SRCIN1/DPP4/TGFB1/TIAM1/BAIAP3/SREBF1/DYSF/NR1D1/SOX4/KCNN4/C1QTNF12/NMU/KCNS3/COMP/F2R/ADCY8/CBLN1/ALOX5/TREM2/ADTRP/ARNTL/ANXA1/APOE/INHBB	24	geneontology_Biological_Process	0.0460653	Up
GO:0043270	GO:0043270	positive regulation of ion transport	17/521	284/18866	0.00243921	0.0418007	0.0345699	SCN1B/ADORA1/KCNJ2/CX3CL1/TESC/UCN/LGALS3/STAC/F2R/CACNG4/APLNR/CTSS/TMSB4X/TREM2/APOE/SYT1/ERFE	17	geneontology_Biological_Process	0.0326296	Up
GO:0008038	GO:0008038	neuron recognition	6/521	50/18866	0.00244406	0.0418007	0.0345699	NRCAM/EPHB3/VSTM2L/TNFRSF21/GAP43/NTM	6	geneontology_Biological_Process	0.0115163	Up
GO:0010718	GO:0010718	positive regulation of epithelial to mesenchymal transition	6/521	50/18866	0.00244406	0.0418007	0.0345699	TGFB1/TIAM1/LOXL2/MDK/TGFBR1/COL1A1	6	geneontology_Biological_Process	0.0115163	Up
GO:0014009	GO:0014009	glial cell proliferation	6/521	50/18866	0.00244406	0.0418007	0.0345699	E2F1/ETV5/CX3CL1/SOX4/PLAG1/TREM2	6	geneontology_Biological_Process	0.0115163	Up
GO:0034332	GO:0034332	adherens junction organization	7/521	67/18866	0.00244604	0.0418007	0.0345699	CDH3/NECTIN4/CDH6/CDH4/CDH2/INAVA/CDH22	7	geneontology_Biological_Process	0.0134357	Up
GO:0007156	GO:0007156	homophilic cell adhesion via plasma membrane adhesion molecules	12/521	168/18866	0.00249432	0.0423334	0.0350104	CDH3/NECTIN4/MPZL2/CDH6/AMIGO2/CDH4/CDH2/VSTM2L/CDH22/CEACAM6/SDK1/DSC3	12	geneontology_Biological_Process	0.0230326	Up
GO:0035592	GO:0035592	establishment of protein localization to extracellular region	24/521	463/18866	0.00249641	0.0423334	0.0350104	SRCIN1/DPP4/TGFB1/TIAM1/BAIAP3/SREBF1/DYSF/NR1D1/SOX4/KCNN4/C1QTNF12/NMU/KCNS3/COMP/F2R/ADCY8/CBLN1/ALOX5/TREM2/ADTRP/ARNTL/ANXA1/APOE/INHBB	24	geneontology_Biological_Process	0.0460653	Up
GO:0007631	GO:0007631	feeding behavior	9/521	105/18866	0.00250813	0.0423691	0.03504	GDF15/REN/STRA6/UCN/NMU/APLN/NPW/DMBX1/RETN	9	geneontology_Biological_Process	0.0172745	Up
GO:0043523	GO:0043523	regulation of neuron apoptotic process	14/521	214/18866	0.00257786	0.0427683	0.0353701	GABRB2/UNC5B/CITED1/CX3CL1/TYRO3/DRAXIN/MDK/VSTM2L/F2R/GRM4/APOE/FOXQ1/CRLF1/ERBB3	14	geneontology_Biological_Process	0.0268714	Up
GO:0016486	GO:0016486	peptide hormone processing	5/521	35/18866	0.002579	0.0427683	0.0353701	ECE1/REN/PCSK1N/PCSK2/SCG5	5	geneontology_Biological_Process	0.00959693	Up
GO:0140448	GO:0140448	signaling receptor ligand precursor processing	5/521	35/18866	0.002579	0.0427683	0.0353701	ECE1/REN/PCSK1N/PCSK2/SCG5	5	geneontology_Biological_Process	0.00959693	Up
GO:1901030	GO:1901030	positive regulation of mitochondrial outer membrane permeabilization involved in apoptotic signaling pathway	5/521	35/18866	0.002579	0.0427683	0.0353701	BBC3/E2F1/BID/SFN/PMAIP1	5	geneontology_Biological_Process	0.00959693	Up
GO:0035023	GO:0035023	regulation of Rho protein signal transduction	8/521	86/18866	0.00258026	0.0427683	0.0353701	EPS8/MET/ITGA3/ARHGDIB/GPR4/RASGRF1/F2R/APOE	8	geneontology_Biological_Process	0.0153551	Up
GO:0061448	GO:0061448	connective tissue development	16/521	262/18866	0.00265043	0.0437669	0.0361959	HMGA2/TGFB1/BMP1/RUNX1/LOXL2/TIMP1/MDK/GPR4/CD44/COMP/TGFBR1/CHI3L1/TGFBI/ECM1/RUNX2/COL1A1	16	geneontology_Biological_Process	0.0307102	Up
GO:0010812	GO:0010812	negative regulation of cell-substrate adhesion	7/521	68/18866	0.00266325	0.0438144	0.0362352	CX3CL1/CDKN2A/TACSTD2/LGALS1/SPOCK1/POSTN/COL1A1	7	geneontology_Biological_Process	0.0134357	Up
GO:0060976	GO:0060976	coronary vasculature development	6/521	51/18866	0.00270654	0.0441968	0.0365515	PLXND1/HEY2/PRDM1/TGFBR1/APLN/APLNR	6	geneontology_Biological_Process	0.0115163	Up
GO:1900047	GO:1900047	negative regulation of hemostasis	6/521	51/18866	0.00270654	0.0441968	0.0365515	PROS1/PLAU/COMP/PLAUR/ADTRP/APOE	6	geneontology_Biological_Process	0.0115163	Up
GO:0001704	GO:0001704	formation of primary germ layer	10/521	127/18866	0.00276929	0.0449742	0.0371944	HMGA2/DUSP4/FN1/LAMB3/ITGA2/ITGA3/WNT3/COL8A1/DUSP5/ITGB4	10	geneontology_Biological_Process	0.0191939	Up
GO:0001942	GO:0001942	hair follicle development	8/521	87/18866	0.00277455	0.0449742	0.0371944	LRP4/CDH3/TMEM79/CD109/WNT10A/FOXQ1/KRT27/KRT17	8	geneontology_Biological_Process	0.0153551	Up
GO:0042454	GO:0042454	ribonucleoside catabolic process	4/521	22/18866	0.00283147	0.0455619	0.0376804	CDA/UPP1/APOBEC3H/PNP	4	geneontology_Biological_Process	0.00767754	Up
GO:0042749	GO:0042749	regulation of circadian sleep/wake cycle	4/521	22/18866	0.00283147	0.0455619	0.0376804	ADORA1/CSF2/NR1D1/NMU	4	geneontology_Biological_Process	0.00767754	Up
GO:0008655	GO:0008655	pyrimidine-containing compound salvage	3/521	11/18866	0.00292798	0.0457783	0.0378594	CDA/UPP1/TK1	3	geneontology_Biological_Process	0.00575816	Up
GO:0021561	GO:0021561	facial nerve development	3/521	11/18866	0.00292798	0.0457783	0.0378594	SEMA3F/NRP2/PLXNA4	3	geneontology_Biological_Process	0.00575816	Up
GO:0021604	GO:0021604	cranial nerve structural organization	3/521	11/18866	0.00292798	0.0457783	0.0378594	SEMA3F/NRP2/PLXNA4	3	geneontology_Biological_Process	0.00575816	Up
GO:0021610	GO:0021610	facial nerve morphogenesis	3/521	11/18866	0.00292798	0.0457783	0.0378594	SEMA3F/NRP2/PLXNA4	3	geneontology_Biological_Process	0.00575816	Up
GO:0034776	GO:0034776	response to histamine	3/521	11/18866	0.00292798	0.0457783	0.0378594	GABRB2/HRH1/AOC1	3	geneontology_Biological_Process	0.00575816	Up
GO:0043097	GO:0043097	pyrimidine nucleoside salvage	3/521	11/18866	0.00292798	0.0457783	0.0378594	CDA/UPP1/TK1	3	geneontology_Biological_Process	0.00575816	Up
GO:0043589	GO:0043589	skin morphogenesis	3/521	11/18866	0.00292798	0.0457783	0.0378594	ITGA2/ITGB4/COL1A1	3	geneontology_Biological_Process	0.00575816	Up
GO:1903980	GO:1903980	positive regulation of microglial cell activation	3/521	11/18866	0.00292798	0.0457783	0.0378594	LRRK2/CTSC/TREM2	3	geneontology_Biological_Process	0.00575816	Up
GO:0071692	GO:0071692	protein localization to extracellular region	24/521	470/18866	0.00302325	0.0471007	0.0389531	SRCIN1/DPP4/TGFB1/TIAM1/BAIAP3/SREBF1/DYSF/NR1D1/SOX4/KCNN4/C1QTNF12/NMU/KCNS3/COMP/F2R/ADCY8/CBLN1/ALOX5/TREM2/ADTRP/ARNTL/ANXA1/APOE/INHBB	24	geneontology_Biological_Process	0.0460653	Up
GO:0007219	GO:0007219	Notch signaling pathway	13/521	195/18866	0.0030745	0.0473967	0.0391978	PTP4A3/PLXND1/JAG2/HEY2/CDH6/DTX4/MDK/PERP/TCIM/ELF3/KRT19/POSTN/TMEM100	13	geneontology_Biological_Process	0.024952	Up
GO:0042098	GO:0042098	T cell proliferation	13/521	195/18866	0.0030745	0.0473967	0.0391978	SDC4/CD151/LGALS3/PDE5A/TNFRSF21/IGFBP2/EBI3/CD55/ANXA1/PELI1/PNP/VTCN1/HLA-G	13	geneontology_Biological_Process	0.024952	Up
GO:1901136	GO:1901136	carbohydrate derivative catabolic process	13/521	195/18866	0.0030745	0.0473967	0.0391978	CDA/TGFB1/UPP1/PDE9A/SDC4/ADAMTS9/APOBEC3H/SDC3/CD44/CHI3L1/PDE5A/CSPG4/PNP	13	geneontology_Biological_Process	0.024952	Up
GO:0002576	GO:0002576	platelet degranulation	10/521	129/18866	0.00310192	0.0476528	0.0394097	PROS1/TGFB1/FN1/SERPINA1/TIMP1/QSOX1/ENDOD1/ECM1/TMSB4X/CD109	10	geneontology_Biological_Process	0.0191939	Up
GO:0061041	GO:0061041	regulation of wound healing	11/521	151/18866	0.00319436	0.0486091	0.0402005	PROS1/CLDN1/TNFRSF12A/PLAU/F2R/CD109/PLAUR/ALOX5/ADTRP/ANXA1/APOE	11	geneontology_Biological_Process	0.0211132	Up
GO:0022404	GO:0022404	molting cycle process	8/521	89/18866	0.00319724	0.0486091	0.0402005	LRP4/CDH3/TMEM79/CD109/WNT10A/FOXQ1/KRT27/KRT17	8	geneontology_Biological_Process	0.0153551	Up
GO:0022405	GO:0022405	hair cycle process	8/521	89/18866	0.00319724	0.0486091	0.0402005	LRP4/CDH3/TMEM79/CD109/WNT10A/FOXQ1/KRT27/KRT17	8	geneontology_Biological_Process	0.0153551	Up
GO:0051346	GO:0051346	negative regulation of hydrolase activity	24/521	473/18866	0.00327624	0.049639	0.0410523	PROS1/LRRK2/SPINT1/SERPINA1/PPP1R1B/TIMP1/PCSK1N/SPINK2/LGALS3/TMEM132D/SFN/CD44/BIRC7/ECM1/CST5/CST2/CD109/PLAUR/SPOCK1/ANXA1/SPOCK2/SLPI/CST6/APOC1	24	geneontology_Biological_Process	0.0460653	Up
GO:0032941	GO:0032941	secretion by tissue	5/521	37/18866	0.00331	0.0499787	0.0413332	ADORA1/AGR2/UCN/KCNN4/AQP5	5	geneontology_Biological_Process	0.00959693	Up
GO:0010721	GO:0010721	negative regulation of cell development	19/521	343/18866	0.00333006	0.0501101	0.0414418	LRP4/NGEF/LRRK2/SEMA6B/BMERB1/SEMA3F/CX3CL1/DRAXIN/NR1D1/WNT3/TRPC5/TACSTD2/BRINP1/LGALS1/SPOCK1/STMN2/APOE/POSTN/SPP1	19	geneontology_Biological_Process	0.0364683	Up
GO:0045861	GO:0045861	negative regulation of proteolysis	20/521	369/18866	0.00337158	0.0505622	0.0418158	PROS1/LRRK2/SPINT1/SERPINA1/CAMK2N1/TIMP1/PCSK1N/SPINK2/SFN/CD44/BIRC7/ECM1/CST5/CST2/CD109/PLAUR/SPOCK1/SPOCK2/SLPI/CST6	20	geneontology_Biological_Process	0.0383877	Up
GO:0098773	GO:0098773	skin epidermis development	8/521	90/18866	0.00342651	0.0512119	0.0423531	LRP4/CDH3/TMEM79/CD109/WNT10A/FOXQ1/KRT27/KRT17	8	geneontology_Biological_Process	0.0153551	Up
GO:0046887	GO:0046887	positive regulation of hormone secretion	10/521	131/18866	0.00346563	0.0516214	0.0426918	BAIAP3/UCN/SOX4/C1QTNF12/NMU/APLN/ADCY8/RETN/INHBB/SPP1	10	geneontology_Biological_Process	0.0191939	Up
GO:0042493	GO:0042493	response to drug	21/521	397/18866	0.00358531	0.0532244	0.0440174	CDH3/HMGA2/DUSP6/CCND1/ABCC3/REN/SREBF1/LPL/ITGA2/MDK/CYP2S1/LCN2/ITGA3/CDKN1A/ICAM1/IGFBP2/LGALS1/ANXA1/PNP/AOC1/COL1A1	21	geneontology_Biological_Process	0.0403071	Up
GO:0050768	GO:0050768	negative regulation of neurogenesis	17/521	295/18866	0.00359811	0.0532351	0.0440263	LRP4/NGEF/LRRK2/SEMA6B/BMERB1/SEMA3F/CX3CL1/DRAXIN/NR1D1/WNT3/TRPC5/BRINP1/LGALS1/SPOCK1/STMN2/APOE/SPP1	17	geneontology_Biological_Process	0.0326296	Up
GO:0042303	GO:0042303	molting cycle	9/521	111/18866	0.00364976	0.0536393	0.0443606	LRP4/CDH3/TMEM79/CD109/WNT10A/ARNTL/FOXQ1/KRT27/KRT17	9	geneontology_Biological_Process	0.0172745	Up
GO:0042633	GO:0042633	hair cycle	9/521	111/18866	0.00364976	0.0536393	0.0443606	LRP4/CDH3/TMEM79/CD109/WNT10A/ARNTL/FOXQ1/KRT27/KRT17	9	geneontology_Biological_Process	0.0172745	Up
GO:0042475	GO:0042475	odontogenesis of dentin-containing tooth	8/521	91/18866	0.00366833	0.0537332	0.0444382	LRP4/JAG2/ADM/PERP/FAM20A/RUNX2/WNT10A/TNC	8	geneontology_Biological_Process	0.0153551	Up
GO:0051250	GO:0051250	negative regulation of lymphocyte activation	11/521	154/18866	0.00371313	0.0542092	0.0448319	RUNX1/SDC4/TYRO3/MDK/LGALS3/PDE5A/TNFRSF21/ANXA1/PELI1/VTCN1/HLA-G	11	geneontology_Biological_Process	0.0211132	Up
GO:1903523	GO:1903523	negative regulation of blood circulation	5/521	38/18866	0.00372649	0.0542247	0.0448447	ADORA1/ADM/PDE5A/F2R/APLN	5	geneontology_Biological_Process	0.00959693	Up
GO:1902903	GO:1902903	regulation of supramolecular fiber organization	20/521	373/18866	0.00380312	0.0547469	0.0452766	TENM1/SPTBN2/FHOD1/NOX4/BMERB1/EPS8/SDC4/CX3CL1/MET/CDC42EP1/TRIM54/CLIP3/ICAM1/TGFBR1/TACSTD2/CDC42EP5/CDC42EP3/TMSB4X/STMN2/APOE	20	geneontology_Biological_Process	0.0383877	Up
GO:0030311	GO:0030311	poly-N-acetyllactosamine biosynthetic process	3/521	12/18866	0.00382446	0.0547469	0.0452766	B3GNT7/B3GNT8/B3GNT3	3	geneontology_Biological_Process	0.00575816	Up
GO:0031581	GO:0031581	hemidesmosome assembly	3/521	12/18866	0.00382446	0.0547469	0.0452766	LAMB3/CD151/ITGB4	3	geneontology_Biological_Process	0.00575816	Up
GO:0032494	GO:0032494	response to peptidoglycan	3/521	12/18866	0.00382446	0.0547469	0.0452766	IRF5/INAVA/TREM2	3	geneontology_Biological_Process	0.00575816	Up
GO:0090394	GO:0090394	negative regulation of excitatory postsynaptic potential	3/521	12/18866	0.00382446	0.0547469	0.0452766	LRRK2/CELF4/CBLN1	3	geneontology_Biological_Process	0.00575816	Up
GO:0106027	GO:0106027	neuron projection organization	8/521	92/18866	0.00392315	0.0558858	0.0462185	SRCIN1/NGEF/EPHB3/LRRK2/TIAM1/DLG4/ITGA3/APOE	8	geneontology_Biological_Process	0.0153551	Up
GO:0044321	GO:0044321	response to leptin	4/521	24/18866	0.00393772	0.0558858	0.0462185	CCND1/NR1D1/EBI3/INHBB	4	geneontology_Biological_Process	0.00767754	Up
GO:0001706	GO:0001706	endoderm formation	6/521	55/18866	0.00397192	0.0558858	0.0462185	HMGA2/DUSP4/FN1/LAMB3/COL8A1/DUSP5	6	geneontology_Biological_Process	0.0115163	Up
GO:0051966	GO:0051966	regulation of synaptic transmission, glutamatergic	7/521	73/18866	0.00397945	0.0558858	0.0462185	ADORA1/LRRK2/UCN/CDH2/CACNG4/GRM4/SYT1	7	geneontology_Biological_Process	0.0134357	Up
GO:1903747	GO:1903747	regulation of establishment of protein localization to mitochondrion	7/521	73/18866	0.00397945	0.0558858	0.0462185	BBC3/E2F1/BID/LRRK2/SREBF1/SFN/PMAIP1	7	geneontology_Biological_Process	0.0134357	Up
GO:0031099	GO:0031099	regeneration	13/521	201/18866	0.00398007	0.0558858	0.0462185	CLDN1/CCND1/DYSF/ADM/MDK/CDKN1A/GAP43/TM4SF4/ANXA1/KLK6/TNC/POSTN/SPP1	13	geneontology_Biological_Process	0.024952	Up
GO:0048771	GO:0048771	tissue remodeling	12/521	178/18866	0.00399451	0.0559105	0.0462389	ABR/TGFB1/NOX4/TIMP1/MDK/DCSTAMP/SIGLEC15/F2R/CSPG4/TGM2/ELF3/SPP1	12	geneontology_Biological_Process	0.0230326	Up
GO:0071333	GO:0071333	cellular response to glucose stimulus	10/521	134/18866	0.00407384	0.0568404	0.047008	TIAM1/NOX4/BAIAP3/NR1D1/SOX4/C1QTNF12/ICAM1/ADCY8/LGALS1/MLXIPL	10	geneontology_Biological_Process	0.0191939	Up
GO:0001662	GO:0001662	behavioral fear response	5/521	39/18866	0.00417922	0.0577623	0.0477704	DPP4/UCN/MDK/BRINP1/APOE	5	geneontology_Biological_Process	0.00959693	Up
GO:0055090	GO:0055090	acylglycerol homeostasis	5/521	39/18866	0.00417922	0.0577623	0.0477704	ADORA1/LPL/PLA2G12B/MLXIPL/APOE	5	geneontology_Biological_Process	0.00959693	Up
GO:0070328	GO:0070328	triglyceride homeostasis	5/521	39/18866	0.00417922	0.0577623	0.0477704	ADORA1/LPL/PLA2G12B/MLXIPL/APOE	5	geneontology_Biological_Process	0.00959693	Up
GO:0042110	GO:0042110	T cell activation	24/521	483/18866	0.00425224	0.0585879	0.0484531	DPP4/JAG2/RUNX1/SDC4/MDK/CD151/LGALS3/RAB27A/SOX4/PRDM1/ICAM1/CD44/PDE5A/TNFRSF21/IGFBP2/RUNX2/EBI3/LGALS1/CD55/ANXA1/PELI1/PNP/VTCN1/HLA-G	24	geneontology_Biological_Process	0.0460653	Up
GO:0010770	GO:0010770	positive regulation of cell morphogenesis involved in differentiation	11/521	157/18866	0.00429716	0.0590223	0.0488124	PLXND1/TIAM1/FN1/TNFRSF12A/MDK/PLXNC1/WNT3/CDH4/TRPC5/PLXNA4/CRABP2	11	geneontology_Biological_Process	0.0211132	Up
GO:0071496	GO:0071496	cellular response to external stimulus	18/521	326/18866	0.004354	0.0596174	0.0493046	CDKN2B/LRRK2/KCNJ2/UPP1/XPR1/SREBF1/LPL/ITGA2/LCN2/CDKN1A/ICAM1/TNC/POSTN/AOC1/PMAIP1/INHBB/MMP7/COL1A1	18	geneontology_Biological_Process	0.0345489	Up
GO:0060349	GO:0060349	bone morphogenesis	8/521	94/18866	0.00447357	0.0609591	0.0504142	COL13A1/NAB2/COMP/DHRS3/MMP16/RUNX2/ALPL/COL1A1	8	geneontology_Biological_Process	0.0153551	Up
GO:0071560	GO:0071560	cellular response to transforming growth factor beta stimulus	15/521	252/18866	0.0045021	0.0609591	0.0504142	GDF15/CDKN2B/TGFB1/CLDN1/NOX4/CITED1/LRG1/ITGA3/IL17RD/TGFBR1/VASN/CD109/WNT10A/POSTN/COL1A1	15	geneontology_Biological_Process	0.0287908	Up
GO:0030203	GO:0030203	glycosaminoglycan metabolic process	11/521	158/18866	0.00450729	0.0609591	0.0504142	TGFB1/B3GNT7/SDC4/B3GNT3/CHST2/B3GAT1/SDC3/CD44/CSPG4/SPOCK2/HS6ST2	11	geneontology_Biological_Process	0.0211132	Up
GO:0050729	GO:0050729	positive regulation of inflammatory response	11/521	158/18866	0.00450729	0.0609591	0.0504142	LRRK2/CX3CL1/LPL/ITGA2/MDK/GPR4/GPRC5B/CTSC/TGM2/C2CD4A/TREM2	11	geneontology_Biological_Process	0.0211132	Up
GO:0071331	GO:0071331	cellular response to hexose stimulus	10/521	136/18866	0.00452409	0.0609991	0.0504473	TIAM1/NOX4/BAIAP3/NR1D1/SOX4/C1QTNF12/ICAM1/ADCY8/LGALS1/MLXIPL	10	geneontology_Biological_Process	0.0191939	Up
GO:0050796	GO:0050796	regulation of insulin secretion	12/521	181/18866	0.00456403	0.06135	0.0507375	DPP4/TIAM1/BAIAP3/SREBF1/NR1D1/SOX4/C1QTNF12/KCNS3/ADCY8/ALOX5/ARNTL/INHBB	12	geneontology_Biological_Process	0.0230326	Up
GO:0006023	GO:0006023	aminoglycan biosynthetic process	9/521	115/18866	0.0046133	0.0618238	0.0511293	TGFB1/B3GNT7/B3GNT8/SDC4/B3GNT3/CHST2/SDC3/CSPG4/HS6ST2	9	geneontology_Biological_Process	0.0172745	Up
GO:0043547	GO:0043547	positive regulation of GTPase activity	21/521	406/18866	0.00462909	0.0618474	0.0511488	ABR/NGEF/GRHL3/LRRK2/RIN1/TIAM1/ARHGAP23/CX3CL1/TBC1D2/ARHGAP36/ARHGDIB/RASGRF1/SIPA1L2/ICAM1/F2R/DOCK9/CCL13/CCL20/CCL17/DEPDC1B/CCL18	21	geneontology_Biological_Process	0.0403071	Up
GO:0031668	GO:0031668	cellular response to extracellular stimulus	15/521	253/18866	0.00466824	0.0620164	0.0512886	CDKN2B/LRRK2/UPP1/XPR1/SREBF1/LPL/LCN2/CDKN1A/ICAM1/TNC/POSTN/AOC1/PMAIP1/INHBB/COL1A1	15	geneontology_Biological_Process	0.0287908	Up
GO:0002209	GO:0002209	behavioral defense response	5/521	40/18866	0.00466987	0.0620164	0.0512886	DPP4/UCN/MDK/BRINP1/APOE	5	geneontology_Biological_Process	0.00959693	Up
GO:0071326	GO:0071326	cellular response to monosaccharide stimulus	10/521	137/18866	0.00476344	0.0627804	0.0519204	TIAM1/NOX4/BAIAP3/NR1D1/SOX4/C1QTNF12/ICAM1/ADCY8/LGALS1/MLXIPL	10	geneontology_Biological_Process	0.0191939	Up
GO:0003073	GO:0003073	regulation of systemic arterial blood pressure	8/521	95/18866	0.00477012	0.0627804	0.0519204	ADORA1/ADRA1B/ECE1/REN/ADM/NMU/F2R/POSTN	8	geneontology_Biological_Process	0.0153551	Up
GO:0051668	GO:0051668	localization within membrane	8/521	95/18866	0.00477012	0.0627804	0.0519204	LRP4/ETV5/DLG4/GLRB/CDH2/CACNG4/SHISA6/APOE	8	geneontology_Biological_Process	0.0153551	Up
GO:0001574	GO:0001574	ganglioside biosynthetic process	3/521	13/18866	0.00487068	0.062976	0.0520822	ST8SIA4/ST3GAL5/ST6GALNAC5	3	geneontology_Biological_Process	0.00575816	Up
GO:0030309	GO:0030309	poly-N-acetyllactosamine metabolic process	3/521	13/18866	0.00487068	0.062976	0.0520822	B3GNT7/B3GNT8/B3GNT3	3	geneontology_Biological_Process	0.00575816	Up
GO:0031274	GO:0031274	positive regulation of pseudopodium assembly	3/521	13/18866	0.00487068	0.062976	0.0520822	CDC42EP1/CDC42EP5/CDC42EP3	3	geneontology_Biological_Process	0.00575816	Up
GO:0099150	GO:0099150	regulation of postsynaptic specialization assembly	3/521	13/18866	0.00487068	0.062976	0.0520822	IL1RAP/GAP43/CBLN1	3	geneontology_Biological_Process	0.00575816	Up
GO:0150052	GO:0150052	regulation of postsynapse assembly	3/521	13/18866	0.00487068	0.062976	0.0520822	IL1RAP/GAP43/CBLN1	3	geneontology_Biological_Process	0.00575816	Up
GO:1903977	GO:1903977	positive regulation of glial cell migration	3/521	13/18866	0.00487068	0.062976	0.0520822	TIAM1/CX3CL1/TREM2	3	geneontology_Biological_Process	0.00575816	Up
GO:1902806	GO:1902806	regulation of cell cycle G1/S phase transition	13/521	206/18866	0.00488967	0.0630367	0.0521324	E2F1/CDKN2B/BID/CCND1/CCND2/SOX4/CDKN2A/SFN/CDKN1A/TCIM/PLPP2/ANXA1/MUC1	13	geneontology_Biological_Process	0.024952	Up
GO:0097191	GO:0097191	extrinsic apoptotic signaling pathway	14/521	230/18866	0.00490473	0.0630465	0.0521405	BID/UNC5B/TNFRSF10C/TGFB1/CSF2/CX3CL1/TNFRSF12A/LCN2/LGALS3/ICAM1/TGFBR1/ERBB3/G0S2/PMAIP1	14	geneontology_Biological_Process	0.0268714	Up
GO:0071347	GO:0071347	cellular response to interleukin-1	12/521	183/18866	0.00497852	0.063809	0.0527711	CX3CL1/NR1D1/LCN2/IL1RAP/NOD1/ICAM1/CHI3L1/CCL13/PELI1/CCL20/CCL17/CCL18	12	geneontology_Biological_Process	0.0230326	Up
GO:0034284	GO:0034284	response to monosaccharide	13/521	207/18866	0.00509019	0.0650512	0.0537984	TIAM1/NOX4/BAIAP3/SREBF1/LPL/ITGA2/NR1D1/SOX4/C1QTNF12/ICAM1/ADCY8/LGALS1/MLXIPL	13	geneontology_Biological_Process	0.024952	Up
GO:0008016	GO:0008016	regulation of heart contraction	15/521	256/18866	0.00519681	0.0660726	0.0546432	SCN1B/ADORA1/HEY2/RYR1/ADRA1B/HCN4/KCNJ2/SREBF1/UCN/ADM/NMU/PDE5A/CACNB1/APLN/CACNG4	15	geneontology_Biological_Process	0.0287908	Up
GO:0042596	GO:0042596	fear response	5/521	41/18866	0.00520009	0.0660726	0.0546432	DPP4/UCN/MDK/BRINP1/APOE	5	geneontology_Biological_Process	0.00959693	Up
GO:0050863	GO:0050863	regulation of T cell activation	18/521	332/18866	0.00524673	0.06644	0.054947	DPP4/RUNX1/SDC4/MDK/LGALS3/SOX4/PRDM1/PDE5A/TNFRSF21/IGFBP2/EBI3/LGALS1/CD55/ANXA1/PELI1/PNP/VTCN1/HLA-G	18	geneontology_Biological_Process	0.0345489	Up
GO:0045766	GO:0045766	positive regulation of angiogenesis	13/521	208/18866	0.00529726	0.06644	0.054947	HMGA2/RUNX1/CX3CL1/CTSH/LRG1/ADM/MDK/FGF1/CHI3L1/ECM1/APLNR/CYP1B1/ANXA1	13	geneontology_Biological_Process	0.024952	Up
GO:1902905	GO:1902905	positive regulation of supramolecular fiber organization	13/521	208/18866	0.00529726	0.06644	0.054947	TENM1/FHOD1/NOX4/SDC4/CX3CL1/MET/CDC42EP1/ICAM1/TGFBR1/CDC42EP5/CDC42EP3/STMN2/APOE	13	geneontology_Biological_Process	0.024952	Up
GO:0032967	GO:0032967	positive regulation of collagen biosynthetic process	4/521	26/18866	0.00530435	0.06644	0.054947	TGFB1/UCN/ITGA2/F2R	4	geneontology_Biological_Process	0.00767754	Up
GO:1905523	GO:1905523	positive regulation of macrophage migration	4/521	26/18866	0.00530435	0.06644	0.054947	CX3CL1/MDK/CXCL17/TREM2	4	geneontology_Biological_Process	0.00767754	Up
GO:0009743	GO:0009743	response to carbohydrate	14/521	233/18866	0.00548828	0.068549	0.0566912	CDT1/TIAM1/NOX4/BAIAP3/SREBF1/LPL/ITGA2/NR1D1/SOX4/C1QTNF12/ICAM1/ADCY8/LGALS1/MLXIPL	14	geneontology_Biological_Process	0.0268714	Up
GO:0032496	GO:0032496	response to lipopolysaccharide	18/521	334/18866	0.00557566	0.0689102	0.0569899	ABR/TGFB1/CLDN1/CITED1/REN/CSF2/CX3CL1/NR1D1/ADM/LCN2/ICAM1/F2R/ALPL/CD55/GGT2/TREM2/PELI1/SLPI	18	geneontology_Biological_Process	0.0345489	Up
GO:0032956	GO:0032956	regulation of actin cytoskeleton organization	19/521	360/18866	0.00557757	0.0689102	0.0569899	TENM1/GRHL3/SPTBN2/FHOD1/NOX4/EPS8/SDC4/CX3CL1/MET/MDK/ARHGDIB/CDC42EP1/ICAM1/SIGLEC15/TGFBR1/TACSTD2/CDC42EP5/CDC42EP3/TMSB4X	19	geneontology_Biological_Process	0.0364683	Up
GO:0070997	GO:0070997	neuron death	19/521	360/18866	0.00557757	0.0689102	0.0569899	ADORA1/GABRB2/BID/UNC5B/LRRK2/CITED1/CX3CL1/TYRO3/DRAXIN/UCN/MDK/VSTM2L/TNFRSF21/F2R/GRM4/APOE/FOXQ1/CRLF1/ERBB3	19	geneontology_Biological_Process	0.0364683	Up
GO:0001822	GO:0001822	kidney development	16/521	283/18866	0.00557971	0.0689102	0.0569899	LRP4/LRRK2/CITED1/REN/STRA6/SDC4/CTSH/ITGA3/GPR4/FGF1/SOX4/TGFBR1/NID1/TACSTD2/FSTL3/CRLF1	16	geneontology_Biological_Process	0.0307102	Up
GO:0034764	GO:0034764	positive regulation of transmembrane transport	13/521	210/18866	0.00573163	0.0704721	0.0582816	KCNJ2/CX3CL1/TESC/C1QTNF12/CLIP3/STAC/F2R/CACNG4/APLNR/CTSS/TMSB4X/TREM2/ERFE	13	geneontology_Biological_Process	0.024952	Up
GO:0061045	GO:0061045	negative regulation of wound healing	7/521	78/18866	0.00573814	0.0704721	0.0582816	PROS1/PLAU/CD109/PLAUR/ALOX5/ADTRP/APOE	7	geneontology_Biological_Process	0.0134357	Up
GO:0032355	GO:0032355	response to estradiol	10/521	141/18866	0.00582195	0.0713027	0.0589685	TGFB1/CCND1/UCN/ITGA2/SSTR3/IGFBP2/GGT2/ANXA1/POSTN/COL1A1	10	geneontology_Biological_Process	0.0191939	Up
GO:0061138	GO:0061138	morphogenesis of a branching epithelium	12/521	187/18866	0.00589742	0.0719499	0.0595038	PLXND1/ETV5/SPINT1/CITED1/MET/CTSH/ADM/MDK/FGF1/TACSTD2/TGM2/TNC	12	geneontology_Biological_Process	0.0230326	Up
GO:1904018	GO:1904018	positive regulation of vasculature development	14/521	235/18866	0.00590743	0.0719499	0.0595038	HMGA2/RUNX1/CX3CL1/CTSH/LRG1/ADM/MDK/FGF1/CHI3L1/ECM1/APLNR/CYP1B1/ANXA1/TMEM100	14	geneontology_Biological_Process	0.0268714	Up
GO:0010935	GO:0010935	regulation of macrophage cytokine production	3/521	14/18866	0.00607315	0.0721739	0.059689	TGFB1/GPRC5B/HLA-G	3	geneontology_Biological_Process	0.00575816	Up
GO:0031272	GO:0031272	regulation of pseudopodium assembly	3/521	14/18866	0.00607315	0.0721739	0.059689	CDC42EP1/CDC42EP5/CDC42EP3	3	geneontology_Biological_Process	0.00575816	Up
GO:0045217	GO:0045217	cell-cell junction maintenance	3/521	14/18866	0.00607315	0.0721739	0.059689	F2R/INAVA/CD177	3	geneontology_Biological_Process	0.00575816	Up
GO:0046131	GO:0046131	pyrimidine ribonucleoside metabolic process	3/521	14/18866	0.00607315	0.0721739	0.059689	CDA/UPP1/APOBEC3H	3	geneontology_Biological_Process	0.00575816	Up
GO:0046133	GO:0046133	pyrimidine ribonucleoside catabolic process	3/521	14/18866	0.00607315	0.0721739	0.059689	CDA/UPP1/APOBEC3H	3	geneontology_Biological_Process	0.00575816	Up
GO:0051775	GO:0051775	response to redox state	3/521	14/18866	0.00607315	0.0721739	0.059689	ARHGDIB/VASN/ARNTL	3	geneontology_Biological_Process	0.00575816	Up
GO:1900452	GO:1900452	regulation of long-term synaptic depression	3/521	14/18866	0.00607315	0.0721739	0.059689	ADORA1/ADCY8/CBLN1	3	geneontology_Biological_Process	0.00575816	Up
GO:1901626	GO:1901626	regulation of postsynaptic membrane organization	3/521	14/18866	0.00607315	0.0721739	0.059689	LRP4/CDH2/SHISA6	3	geneontology_Biological_Process	0.00575816	Up
GO:1903054	GO:1903054	negative regulation of extracellular matrix organization	3/521	14/18866	0.00607315	0.0721739	0.059689	DPP4/TGFB1/ADTRP	3	geneontology_Biological_Process	0.00575816	Up
GO:0010714	GO:0010714	positive regulation of collagen metabolic process	4/521	27/18866	0.00609313	0.0722167	0.0597244	TGFB1/UCN/ITGA2/F2R	4	geneontology_Biological_Process	0.00767754	Up
GO:0043123	GO:0043123	positive regulation of I-kappaB kinase/NF-kappaB signaling	12/521	188/18866	0.00614693	0.0726591	0.0600902	CX3CL1/UNC5CL/EDA2R/GPRC5B/NOD1/F2R/ECM1/TGM2/INAVA/LGALS1/LURAP1L/PELI1	12	geneontology_Biological_Process	0.0230326	Up
GO:0070838	GO:0070838	divalent metal ion transport	23/521	471/18866	0.00622026	0.0733293	0.0606445	TUSC3/CLDN16/RYR1/KCNJ2/CX3CL1/UCN/DYSF/GJA4/CATSPER1/LGALS3/CRACR2B/TMEM163/KCNN4/ICAM1/STAC/TRPC5/CACNB1/F2R/CACNG4/APLNR/RAMP1/SLC30A2/SLC30A3	23	geneontology_Biological_Process	0.0441459	Up
GO:0150077	GO:0150077	regulation of neuroinflammatory response	5/521	43/18866	0.00638581	0.0748535	0.0619051	LRRK2/CX3CL1/NR1D1/CTSC/TREM2	5	geneontology_Biological_Process	0.00959693	Up
GO:0007369	GO:0007369	gastrulation	12/521	189/18866	0.00640473	0.0748535	0.0619051	HMGA2/DUSP4/FN1/LAMB3/ITGA2/ITGA3/WNT3/COL8A1/APLN/DUSP5/APLNR/ITGB4	12	geneontology_Biological_Process	0.0230326	Up
GO:0007613	GO:0007613	memory	9/521	121/18866	0.00641674	0.0748535	0.0619051	RIN1/PPP1R1B/HRH1/MDK/ITGA3/RASGRF1/BRINP1/ADCY8/APOE	9	geneontology_Biological_Process	0.0172745	Up
GO:0030073	GO:0030073	insulin secretion	13/521	213/18866	0.00643608	0.0748535	0.0619051	DPP4/TIAM1/BAIAP3/SREBF1/NR1D1/SOX4/C1QTNF12/KCNS3/ADCY8/ALOX5/ARNTL/ANXA1/INHBB	13	geneontology_Biological_Process	0.024952	Up
GO:0010631	GO:0010631	epithelial cell migration	19/521	365/18866	0.00643609	0.0748535	0.0619051	PTP4A3/PLXND1/DPP4/TGFB1/MET/LOXL2/CTSH/ITGA2/ADAMTS9/NRP2/ITGA3/FGF1/TGFBR1/TACSTD2/CYP1B1/TMSB4X/ADTRP/ANXA1/APOE	19	geneontology_Biological_Process	0.0364683	Up
GO:1903532	GO:1903532	positive regulation of secretion by cell	17/521	313/18866	0.00645143	0.0748535	0.0619051	TGFB1/SDC4/BAIAP3/UCN/RAB27A/SOX4/KCNN4/C1QTNF12/NMU/APLN/ADCY8/TREM2/RETN/SYT1/INHBB/CD177/SPP1	17	geneontology_Biological_Process	0.0326296	Up
GO:0060070	GO:0060070	canonical Wnt signaling pathway	18/521	339/18866	0.00647229	0.0748984	0.0619422	LRP4/CDH3/SCEL/TGFB1/LRRK2/DRAXIN/MDK/SOX4/GPRC5B/WNT3/CDH2/IGFBP2/SHISA6/WNT10A/ARNTL/APOE/IGFBP6/COL1A1	18	geneontology_Biological_Process	0.0345489	Up
GO:0003170	GO:0003170	heart valve development	6/521	61/18866	0.00662513	0.0758706	0.0627462	HEY2/TGFB1/STRA6/ADAMTS9/SOX4/PRDM1	6	geneontology_Biological_Process	0.0115163	Up
GO:0016266	GO:0016266	O-glycan processing	6/521	61/18866	0.00662513	0.0758706	0.0627462	GALNT7/B3GNT7/B3GNT8/B3GNT3/MUC21/MUC1	6	geneontology_Biological_Process	0.0115163	Up
GO:0033619	GO:0033619	membrane protein proteolysis	6/521	61/18866	0.00662513	0.0758706	0.0627462	TGFB1/CTSH/TMPRSS6/TIMP1/APOE/NAPSA	6	geneontology_Biological_Process	0.0115163	Up
GO:1903078	GO:1903078	positive regulation of protein localization to plasma membrane	6/521	61/18866	0.00662513	0.0758706	0.0627462	AGR2/LGALS3/ITGA3/CLIP3/STAC/TREM2	6	geneontology_Biological_Process	0.0115163	Up
GO:0051047	GO:0051047	positive regulation of secretion	18/521	340/18866	0.00666496	0.0760011	0.0628542	ADORA1/TGFB1/SDC4/BAIAP3/UCN/RAB27A/SOX4/KCNN4/C1QTNF12/NMU/APLN/ADCY8/TREM2/RETN/SYT1/INHBB/CD177/SPP1	18	geneontology_Biological_Process	0.0345489	Up
GO:0051048	GO:0051048	negative regulation of secretion	12/521	190/18866	0.006671	0.0760011	0.0628542	SRCIN1/ABR/ADORA1/SREBF1/UCN/NMU/F2R/ADTRP/ANXA1/APOE/ERBB3/INHBB	12	geneontology_Biological_Process	0.0230326	Up
GO:0001819	GO:0001819	positive regulation of cytokine production	22/521	447/18866	0.00673867	0.0765743	0.0633282	TGFB1/RUNX1/CSF2/CX3CL1/STING1/IRF5/UCN/LPL/MDK/IL1RAP/GPRC5B/NOD1/CXCL17/F2R/INAVA/CYP1B1/EBI3/CRLF2/TREM2/ANXA1/PELI1/HLA-G	22	geneontology_Biological_Process	0.0422265	Up
GO:0046394	GO:0046394	carboxylic acid biosynthetic process	19/521	367/18866	0.00680838	0.0771674	0.0638187	LIPH/TGFB1/MTHFD1L/FOLH1/NAT8L/LPL/NR1D1/ALDH1A3/OLAH/ALOX15B/GGT6/CSPG4/CARNS1/GGT2/ALOX5/ANXA1/MLXIPL/SCD/APOC1	19	geneontology_Biological_Process	0.0364683	Up
GO:0048167	GO:0048167	regulation of synaptic plasticity	12/521	191/18866	0.00694593	0.0777701	0.0643172	ADORA1/RIN1/DLG4/CX3CL1/SYT12/HRH1/LZTS1/RASGRF1/ADCY8/CBLN1/SHISA6/APOE	12	geneontology_Biological_Process	0.0230326	Up
GO:0006929	GO:0006929	substrate-dependent cell migration	4/521	28/18866	0.00695615	0.0777701	0.0643172	FN1/TNFRSF12A/ITGA2/CSPG4	4	geneontology_Biological_Process	0.00767754	Up
GO:0010460	GO:0010460	positive regulation of heart rate	4/521	28/18866	0.00695615	0.0777701	0.0643172	HEY2/ADRA1B/ADM/NMU	4	geneontology_Biological_Process	0.00767754	Up
GO:0042745	GO:0042745	circadian sleep/wake cycle	4/521	28/18866	0.00695615	0.0777701	0.0643172	ADORA1/CSF2/NR1D1/NMU	4	geneontology_Biological_Process	0.00767754	Up
GO:0016053	GO:0016053	organic acid biosynthetic process	19/521	368/18866	0.00700099	0.0777701	0.0643172	LIPH/TGFB1/MTHFD1L/FOLH1/NAT8L/LPL/NR1D1/ALDH1A3/OLAH/ALOX15B/GGT6/CSPG4/CARNS1/GGT2/ALOX5/ANXA1/MLXIPL/SCD/APOC1	19	geneontology_Biological_Process	0.0364683	Up
GO:0090132	GO:0090132	epithelium migration	19/521	368/18866	0.00700099	0.0777701	0.0643172	PTP4A3/PLXND1/DPP4/TGFB1/MET/LOXL2/CTSH/ITGA2/ADAMTS9/NRP2/ITGA3/FGF1/TGFBR1/TACSTD2/CYP1B1/TMSB4X/ADTRP/ANXA1/APOE	19	geneontology_Biological_Process	0.0364683	Up
GO:0097193	GO:0097193	intrinsic apoptotic signaling pathway	16/521	290/18866	0.00700222	0.0777701	0.0643172	BBC3/PHLDA3/E2F1/BID/LRRK2/EDA2R/SFN/CDKN1A/PERP/CD44/RNF183/CYP1B1/PLAUR/DAPK2/PMAIP1/MUC1	16	geneontology_Biological_Process	0.0307102	Up
GO:0001913	GO:0001913	T cell mediated cytotoxicity	5/521	44/18866	0.00704452	0.0777701	0.0643172	CTSH/RAB27A/CTSC/CD1A/HLA-G	5	geneontology_Biological_Process	0.00959693	Up
GO:0031670	GO:0031670	cellular response to nutrient	5/521	44/18866	0.00704452	0.0777701	0.0643172	CDKN2B/LPL/TNC/POSTN/COL1A1	5	geneontology_Biological_Process	0.00959693	Up
GO:0045684	GO:0045684	positive regulation of epidermis development	5/521	44/18866	0.00704452	0.0777701	0.0643172	ETV4/TMEM79/SFN/ALOX15B/KRT17	5	geneontology_Biological_Process	0.00959693	Up
GO:0071322	GO:0071322	cellular response to carbohydrate stimulus	10/521	145/18866	0.00705558	0.0777701	0.0643172	TIAM1/NOX4/BAIAP3/NR1D1/SOX4/C1QTNF12/ICAM1/ADCY8/LGALS1/MLXIPL	10	geneontology_Biological_Process	0.0191939	Up
GO:0055081	GO:0055081	anion homeostasis	6/521	62/18866	0.0071682	0.0786184	0.0650187	ADORA1/XPR1/SLC34A2/MLXIPL/APOE/CA12	6	geneontology_Biological_Process	0.0115163	Up
GO:0060997	GO:0060997	dendritic spine morphogenesis	6/521	62/18866	0.0071682	0.0786184	0.0650187	SRCIN1/NGEF/EPHB3/LRRK2/TIAM1/DLG4	6	geneontology_Biological_Process	0.0115163	Up
GO:0060996	GO:0060996	dendritic spine development	8/521	102/18866	0.00728801	0.0797341	0.0659414	SRCIN1/NGEF/EPHB3/LRRK2/TIAM1/DLG4/SDK1/APOE	8	geneontology_Biological_Process	0.0153551	Up
GO:0072511	GO:0072511	divalent inorganic cation transport	23/521	478/18866	0.00737534	0.0804898	0.0665664	TUSC3/CLDN16/RYR1/KCNJ2/CX3CL1/UCN/DYSF/GJA4/CATSPER1/LGALS3/CRACR2B/TMEM163/KCNN4/ICAM1/STAC/TRPC5/CACNB1/F2R/CACNG4/APLNR/RAMP1/SLC30A2/SLC30A3	23	geneontology_Biological_Process	0.0441459	Up
GO:2000345	GO:2000345	regulation of hepatocyte proliferation	3/521	15/18866	0.00743748	0.0807945	0.0668184	MDK/FGF1/HPN	3	geneontology_Biological_Process	0.00575816	Up
GO:0048568	GO:0048568	embryonic organ development	22/521	451/18866	0.00744517	0.0807945	0.0668184	ABR/PLCD3/COL13A1/GRHL3/HEY2/TGFB1/SPINT1/MTHFD1L/CITED1/STRA6/CSF2/ADM/ALDH1A3/MDFI/PHLDA2/PRDM1/TGFBR1/MMP16/RUNX2/MFAP2/HPN/KRT19	22	geneontology_Biological_Process	0.0422265	Up
GO:0072001	GO:0072001	renal system development	16/521	292/18866	0.00745823	0.0807945	0.0668184	LRP4/LRRK2/CITED1/REN/STRA6/SDC4/CTSH/ITGA3/GPR4/FGF1/SOX4/TGFBR1/NID1/TACSTD2/FSTL3/CRLF1	16	geneontology_Biological_Process	0.0307102	Up
GO:0051101	GO:0051101	regulation of DNA binding	9/521	124/18866	0.00750044	0.0810526	0.0670318	E2F1/HMGA2/CDT1/HEY2/TGFB1/ITGA2/MDFI/TMSB4X/PLAUR	9	geneontology_Biological_Process	0.0172745	Up
GO:0120193	GO:0120193	tight junction organization	7/521	82/18866	0.00751911	0.0810557	0.0670344	CLDN16/CLDN1/RUNX1/CLDN9/CLDN10/TGFBR1/CLDN2	7	geneontology_Biological_Process	0.0134357	Up
GO:0031571	GO:0031571	mitotic G1 DNA damage checkpoint	6/521	63/18866	0.00774273	0.0827274	0.0684169	E2F1/CCND1/SOX4/SFN/CDKN1A/MUC1	6	geneontology_Biological_Process	0.0115163	Up
GO:1904064	GO:1904064	positive regulation of cation transmembrane transport	10/521	147/18866	0.00774373	0.0827274	0.0684169	KCNJ2/CX3CL1/TESC/STAC/F2R/CACNG4/APLNR/CTSS/TMSB4X/TREM2	10	geneontology_Biological_Process	0.0191939	Up
GO:0051204	GO:0051204	protein insertion into mitochondrial membrane	5/521	45/18866	0.00774924	0.0827274	0.0684169	BBC3/E2F1/BID/SFN/PMAIP1	5	geneontology_Biological_Process	0.00959693	Up
GO:1901028	GO:1901028	regulation of mitochondrial outer membrane permeabilization involved in apoptotic signaling pathway	5/521	45/18866	0.00774924	0.0827274	0.0684169	BBC3/E2F1/BID/SFN/PMAIP1	5	geneontology_Biological_Process	0.00959693	Up
GO:1900046	GO:1900046	regulation of hemostasis	7/521	83/18866	0.00802188	0.085431	0.0706529	PROS1/PLAU/COMP/F2R/PLAUR/ADTRP/APOE	7	geneontology_Biological_Process	0.0134357	Up
GO:0050670	GO:0050670	regulation of lymphocyte proliferation	13/521	219/18866	0.00805086	0.0855331	0.0707373	SDC4/LGALS3/CDKN1A/PDE5A/TNFRSF21/IGFBP2/EBI3/CD55/ANXA1/PELI1/PNP/VTCN1/HLA-G	13	geneontology_Biological_Process	0.024952	Up
GO:0002027	GO:0002027	regulation of heart rate	8/521	104/18866	0.00816391	0.0861117	0.0712158	SCN1B/HEY2/ADRA1B/HCN4/KCNJ2/SREBF1/ADM/NMU	8	geneontology_Biological_Process	0.0153551	Up
GO:0002456	GO:0002456	T cell mediated immunity	8/521	104/18866	0.00816391	0.0861117	0.0712158	CTSH/RAB27A/ICAM1/CTSC/CD55/CD1A/MYO1G/HLA-G	8	geneontology_Biological_Process	0.0153551	Up
GO:0120034	GO:0120034	positive regulation of plasma membrane bounded cell projection assembly	8/521	104/18866	0.00816391	0.0861117	0.0712158	TENM1/EPS8/CDC42EP1/ESPN/TGFBR1/CDC42EP5/CDC42EP3/PALM	8	geneontology_Biological_Process	0.0153551	Up
GO:0060828	GO:0060828	regulation of canonical Wnt signaling pathway	16/521	295/18866	0.00818666	0.0861312	0.0712319	LRP4/CDH3/SCEL/TGFB1/LRRK2/DRAXIN/MDK/SOX4/GPRC5B/CDH2/IGFBP2/SHISA6/ARNTL/APOE/IGFBP6/COL1A1	16	geneontology_Biological_Process	0.0307102	Up
GO:1901214	GO:1901214	regulation of neuron death	17/521	321/18866	0.00820483	0.0861312	0.0712319	ADORA1/GABRB2/UNC5B/LRRK2/CITED1/CX3CL1/TYRO3/DRAXIN/UCN/MDK/VSTM2L/F2R/GRM4/APOE/FOXQ1/CRLF1/ERBB3	17	geneontology_Biological_Process	0.0326296	Up
GO:0090130	GO:0090130	tissue migration	19/521	374/18866	0.00825185	0.086419	0.0714699	PTP4A3/PLXND1/DPP4/TGFB1/MET/LOXL2/CTSH/ITGA2/ADAMTS9/NRP2/ITGA3/FGF1/TGFBR1/TACSTD2/CYP1B1/TMSB4X/ADTRP/ANXA1/APOE	19	geneontology_Biological_Process	0.0364683	Up
GO:0042130	GO:0042130	negative regulation of T cell proliferation	6/521	64/18866	0.00834971	0.0868251	0.0718058	SDC4/PDE5A/TNFRSF21/PELI1/VTCN1/HLA-G	6	geneontology_Biological_Process	0.0115163	Up
GO:0044783	GO:0044783	G1 DNA damage checkpoint	6/521	64/18866	0.00834971	0.0868251	0.0718058	E2F1/CCND1/SOX4/SFN/CDKN1A/MUC1	6	geneontology_Biological_Process	0.0115163	Up
GO:0044819	GO:0044819	mitotic G1/S transition checkpoint	6/521	64/18866	0.00834971	0.0868251	0.0718058	E2F1/CCND1/SOX4/SFN/CDKN1A/MUC1	6	geneontology_Biological_Process	0.0115163	Up
GO:0051489	GO:0051489	regulation of filopodium assembly	5/521	46/18866	0.00850151	0.0881957	0.0729393	TENM1/ESPN/TGFBR1/GAP43/PALM	5	geneontology_Biological_Process	0.00959693	Up
GO:0050886	GO:0050886	endocrine process	7/521	84/18866	0.00854899	0.08848	0.0731744	ECE1/REN/UCN/F2R/APLN/RETN/INHBB	7	geneontology_Biological_Process	0.0134357	Up
GO:0032944	GO:0032944	regulation of mononuclear cell proliferation	13/521	221/18866	0.00865484	0.0891885	0.0737604	SDC4/LGALS3/CDKN1A/PDE5A/TNFRSF21/IGFBP2/EBI3/CD55/ANXA1/PELI1/PNP/VTCN1/HLA-G	13	geneontology_Biological_Process	0.024952	Up
GO:0006469	GO:0006469	negative regulation of protein kinase activity	14/521	246/18866	0.00869407	0.0891885	0.0737604	SRCIN1/CDKN2B/DUSP4/CAMK2N2/DUSP6/MVP/CAMK2N1/PPP1R1B/TESC/CDKN2A/SFN/CDKN1A/DUSP5/APOE	14	geneontology_Biological_Process	0.0268714	Up
GO:0051056	GO:0051056	regulation of small GTPase mediated signal transduction	17/521	323/18866	0.00869812	0.0891885	0.0737604	ABR/NGEF/TIAM1/EPS8/ARHGAP23/MET/PSD3/ARHGAP36/ITGA3/ARHGDIB/GPR4/RASGRF1/SIPA1L2/F2R/RHOV/APOE/DEPDC1B	17	geneontology_Biological_Process	0.0326296	Up
GO:0003015	GO:0003015	heart process	16/521	297/18866	0.00870312	0.0891885	0.0737604	SCN1B/ADORA1/HEY2/RYR1/ADRA1B/HCN4/KCNJ2/NOX4/SREBF1/UCN/ADM/NMU/PDE5A/CACNB1/APLN/CACNG4	16	geneontology_Biological_Process	0.0307102	Up
GO:0017015	GO:0017015	regulation of transforming growth factor beta receptor signaling pathway	9/521	127/18866	0.00871859	0.0891885	0.0737604	CDKN2B/TGFB1/CITED1/LRG1/ITGA3/IL17RD/TGFBR1/VASN/CD109	9	geneontology_Biological_Process	0.0172745	Up
GO:0009749	GO:0009749	response to glucose	12/521	197/18866	0.00878809	0.0892731	0.0738303	TIAM1/NOX4/BAIAP3/SREBF1/LPL/NR1D1/SOX4/C1QTNF12/ICAM1/ADCY8/LGALS1/MLXIPL	12	geneontology_Biological_Process	0.0230326	Up
GO:0048265	GO:0048265	response to pain	4/521	30/18866	0.00891596	0.0892731	0.0738303	LPAR5/UCN/GJA4/VWA1	4	geneontology_Biological_Process	0.00767754	Up
GO:0051491	GO:0051491	positive regulation of filopodium assembly	4/521	30/18866	0.00891596	0.0892731	0.0738303	TENM1/ESPN/TGFBR1/PALM	4	geneontology_Biological_Process	0.00767754	Up
GO:0002523	GO:0002523	leukocyte migration involved in inflammatory response	3/521	16/18866	0.00896845	0.0892731	0.0738303	CX3CL1/MDK/ALOX5	3	geneontology_Biological_Process	0.00575816	Up
GO:0010934	GO:0010934	macrophage cytokine production	3/521	16/18866	0.00896845	0.0892731	0.0738303	TGFB1/GPRC5B/HLA-G	3	geneontology_Biological_Process	0.00575816	Up
GO:0031269	GO:0031269	pseudopodium assembly	3/521	16/18866	0.00896845	0.0892731	0.0738303	CDC42EP1/CDC42EP5/CDC42EP3	3	geneontology_Biological_Process	0.00575816	Up
GO:0043174	GO:0043174	nucleoside salvage	3/521	16/18866	0.00896845	0.0892731	0.0738303	CDA/UPP1/TK1	3	geneontology_Biological_Process	0.00575816	Up
GO:0046134	GO:0046134	pyrimidine nucleoside biosynthetic process	3/521	16/18866	0.00896845	0.0892731	0.0738303	CDA/UPP1/TK1	3	geneontology_Biological_Process	0.00575816	Up
GO:0051238	GO:0051238	sequestering of metal ion	3/521	16/18866	0.00896845	0.0892731	0.0738303	LCN2/SLC30A2/SLC30A3	3	geneontology_Biological_Process	0.00575816	Up
GO:1905874	GO:1905874	regulation of postsynaptic density organization	3/521	16/18866	0.00896845	0.0892731	0.0738303	IL1RAP/CDH2/CBLN1	3	geneontology_Biological_Process	0.00575816	Up
GO:2001212	GO:2001212	regulation of vasculogenesis	3/521	16/18866	0.00896845	0.0892731	0.0738303	HEY2/ADM/TMEM100	3	geneontology_Biological_Process	0.00575816	Up
GO:0045604	GO:0045604	regulation of epidermal cell differentiation	6/521	65/18866	0.00899008	0.0892731	0.0738303	ETV4/HEY2/RUNX1/SFN/ALOX15B/CD109	6	geneontology_Biological_Process	0.0115163	Up
GO:0048247	GO:0048247	lymphocyte chemotaxis	6/521	65/18866	0.00899008	0.0892731	0.0738303	CX3CL1/CCL13/CCL20/CCL17/CCL18/CXCL14	6	geneontology_Biological_Process	0.0115163	Up
GO:0034446	GO:0034446	substrate adhesion-dependent cell spreading	8/521	106/18866	0.00911648	0.0897477	0.0742229	SRCIN1/EPHB3/FN1/LAMB3/TYRO3/MDK/TACSTD2/POSTN	8	geneontology_Biological_Process	0.0153551	Up
GO:0071156	GO:0071156	regulation of cell cycle arrest	8/521	106/18866	0.00911648	0.0897477	0.0742229	E2F1/HMGA2/CCND1/SOX4/SFN/CDKN1A/MLXIPL/MUC1	8	geneontology_Biological_Process	0.0153551	Up
GO:0010469	GO:0010469	regulation of signaling receptor activity	11/521	174/18866	0.0091193	0.0897477	0.0742229	ADORA1/TGFA/DLG4/PLAU/NPTXR/PHLDA2/RASGRF1/NPTX2/CACNG4/LY6E/SHISA6	11	geneontology_Biological_Process	0.0211132	Up
GO:0051099	GO:0051099	positive regulation of binding	11/521	174/18866	0.0091193	0.0897477	0.0742229	PLXND1/CDT1/TGFB1/LRRK2/TIAM1/MET/STING1/ITGA2/PLAUR/APOE/RAMP1	11	geneontology_Biological_Process	0.0211132	Up
GO:0042551	GO:0042551	neuron maturation	5/521	47/18866	0.00930283	0.090945	0.075213	NRCAM/LRRK2/CX3CL1/C1QL1/GLDN	5	geneontology_Biological_Process	0.00959693	Up
GO:0048483	GO:0048483	autonomic nervous system development	5/521	47/18866	0.00930283	0.090945	0.075213	FN1/SEMA3F/NRP2/SOX4/PLXNA4	5	geneontology_Biological_Process	0.00959693	Up
GO:0060986	GO:0060986	endocrine hormone secretion	5/521	47/18866	0.00930283	0.090945	0.075213	REN/UCN/APLN/RETN/INHBB	5	geneontology_Biological_Process	0.00959693	Up
GO:0002696	GO:0002696	positive regulation of leukocyte activation	20/521	406/18866	0.00942391	0.0919248	0.0760233	DPP4/TGFB1/LRRK2/RUNX1/MDK/SOX4/CDKN1A/CTSC/IGFBP2/EBI3/LGALS1/CRLF2/CD55/TREM2/ANXA1/PELI1/PNP/VTCN1/HLA-G/CD177	20	geneontology_Biological_Process	0.0383877	Up
GO:0045927	GO:0045927	positive regulation of growth	15/521	274/18866	0.00947277	0.0921975	0.0762488	HEY2/FN1/AGR2/TNFRSF12A/UCN/WNT3/SFN/CDH4/PRSS2/TRPC5/TGFBR1/HPN/SYT1/KRT17/CRABP2	15	geneontology_Biological_Process	0.0287908	Up
GO:1903844	GO:1903844	regulation of cellular response to transforming growth factor beta stimulus	9/521	129/18866	0.00961031	0.0933301	0.0771856	CDKN2B/TGFB1/CITED1/LRG1/ITGA3/IL17RD/TGFBR1/VASN/CD109	9	geneontology_Biological_Process	0.0172745	Up
GO:0007585	GO:0007585	respiratory gaseous exchange by respiratory system	6/521	66/18866	0.00966482	0.0935839	0.0773955	ADORA1/JAG2/APLN/SFTPB/SFTPA1/SFTPA2	6	geneontology_Biological_Process	0.0115163	Up
GO:0006919	GO:0006919	activation of cysteine-type endopeptidase activity involved in apoptotic process	7/521	86/18866	0.0096789	0.0935839	0.0773955	BBC3/BID/CTSH/NOD1/TNFSF15/F2R/PMAIP1	7	geneontology_Biological_Process	0.0134357	Up
GO:0045665	GO:0045665	negative regulation of neuron differentiation	13/521	225/18866	0.00996928	0.0961806	0.079543	LRP4/NGEF/LRRK2/SEMA6B/SEMA3F/DRAXIN/WNT3/TRPC5/LGALS1/SPOCK1/STMN2/APOE/SPP1	13	geneontology_Biological_Process	0.024952	Up
GO:0001678	GO:0001678	cellular glucose homeostasis	10/521	153/18866	0.0101213	0.0969091	0.0801454	TIAM1/NOX4/BAIAP3/NR1D1/SOX4/C1QTNF12/ICAM1/ADCY8/LGALS1/MLXIPL	10	geneontology_Biological_Process	0.0191939	Up
GO:0045834	GO:0045834	positive regulation of lipid metabolic process	10/521	153/18866	0.0101213	0.0969091	0.0801454	ADORA1/TGFB1/SREBF1/NR1D1/ADM/FGF1/ANXA1/MLXIPL/APOE/APOC1	10	geneontology_Biological_Process	0.0191939	Up
GO:0006024	GO:0006024	glycosaminoglycan biosynthetic process	8/521	108/18866	0.0101496	0.0969091	0.0801454	TGFB1/B3GNT7/SDC4/B3GNT3/CHST2/SDC3/CSPG4/HS6ST2	8	geneontology_Biological_Process	0.0153551	Up
GO:0014911	GO:0014911	positive regulation of smooth muscle cell migration	5/521	48/18866	0.0101547	0.0969091	0.0801454	S100A11/NOX4/ITGA2/MDK/POSTN	5	geneontology_Biological_Process	0.00959693	Up
GO:0033628	GO:0033628	regulation of cell adhesion mediated by integrin	5/521	48/18866	0.0101547	0.0969091	0.0801454	DPP4/TESC/PLAU/CYP1B1/MUC1	5	geneontology_Biological_Process	0.00959693	Up
GO:0006026	GO:0006026	aminoglycan catabolic process	6/521	67/18866	0.0103749	0.0985835	0.0815302	TGFB1/SDC4/SDC3/CD44/CHI3L1/CSPG4	6	geneontology_Biological_Process	0.0115163	Up
GO:0071300	GO:0071300	cellular response to retinoic acid	6/521	67/18866	0.0103749	0.0985835	0.0815302	GJB3/TESC/WNT3/BRINP1/TNC/COL1A1	6	geneontology_Biological_Process	0.0115163	Up
GO:0062013	GO:0062013	positive regulation of small molecule metabolic process	10/521	154/18866	0.0105664	0.0994593	0.0822545	HRH1/SREBF1/NR1D1/ADM/FGF1/TMSB4X/TREM2/ANXA1/MLXIPL/PMAIP1	10	geneontology_Biological_Process	0.0191939	Up
GO:0009746	GO:0009746	response to hexose	12/521	202/18866	0.0105969	0.0994593	0.0822545	TIAM1/NOX4/BAIAP3/SREBF1/LPL/NR1D1/SOX4/C1QTNF12/ICAM1/ADCY8/LGALS1/MLXIPL	12	geneontology_Biological_Process	0.0230326	Up
GO:0034341	GO:0034341	response to interferon-gamma	12/521	202/18866	0.0105969	0.0994593	0.0822545	CLDN1/CITED1/CX3CL1/IRF5/ICAM1/CD44/CCL13/CCL20/CCL17/HLA-G/HLA-DQB2/CCL18	12	geneontology_Biological_Process	0.0230326	Up
GO:0003198	GO:0003198	epithelial to mesenchymal transition involved in endocardial cushion formation	3/521	17/18866	0.0106701	0.0994593	0.0822545	HEY2/TGFBR1/TMEM100	3	geneontology_Biological_Process	0.00575816	Up
GO:0015693	GO:0015693	magnesium ion transport	3/521	17/18866	0.0106701	0.0994593	0.0822545	TUSC3/CLDN16/KCNJ2	3	geneontology_Biological_Process	0.00575816	Up
GO:0021783	GO:0021783	preganglionic parasympathetic fiber development	3/521	17/18866	0.0106701	0.0994593	0.0822545	SEMA3F/NRP2/PLXNA4	3	geneontology_Biological_Process	0.00575816	Up
GO:0031268	GO:0031268	pseudopodium organization	3/521	17/18866	0.0106701	0.0994593	0.0822545	CDC42EP1/CDC42EP5/CDC42EP3	3	geneontology_Biological_Process	0.00575816	Up
GO:0048532	GO:0048532	anatomical structure arrangement	3/521	17/18866	0.0106701	0.0994593	0.0822545	SEMA3F/NRP2/PLXNA4	3	geneontology_Biological_Process	0.00575816	Up
GO:0055089	GO:0055089	fatty acid homeostasis	3/521	17/18866	0.0106701	0.0994593	0.0822545	ADORA1/MLXIPL/APOE	3	geneontology_Biological_Process	0.00575816	Up
GO:0110053	GO:0110053	regulation of actin filament organization	15/521	278/18866	0.0107234	0.099746	0.0824916	TENM1/SPTBN2/FHOD1/NOX4/EPS8/SDC4/CX3CL1/MET/CDC42EP1/ICAM1/TGFBR1/TACSTD2/CDC42EP5/CDC42EP3/TMSB4X	15	geneontology_Biological_Process	0.0287908	Up
GO:0046889	GO:0046889	positive regulation of lipid biosynthetic process	7/521	88/18866	0.0109141	0.101306	0.083782	SREBF1/NR1D1/ADM/FGF1/ANXA1/MLXIPL/APOE	7	geneontology_Biological_Process	0.0134357	Up
GO:0060711	GO:0060711	labyrinthine layer development	5/521	49/18866	0.0110585	0.102002	0.0843572	PLCD3/HEY2/SPINT1/CITED1/ADM	5	geneontology_Biological_Process	0.00959693	Up
GO:0090151	GO:0090151	establishment of protein localization to mitochondrial membrane	5/521	49/18866	0.0110585	0.102002	0.0843572	BBC3/E2F1/BID/SFN/PMAIP1	5	geneontology_Biological_Process	0.00959693	Up
GO:0090199	GO:0090199	regulation of release of cytochrome c from mitochondria	5/521	49/18866	0.0110585	0.102002	0.0843572	BBC3/BID/HRK/PLAUR/PMAIP1	5	geneontology_Biological_Process	0.00959693	Up
GO:1904377	GO:1904377	positive regulation of protein localization to cell periphery	6/521	68/18866	0.0111211	0.102278	0.0845859	AGR2/LGALS3/ITGA3/CLIP3/STAC/TREM2	6	geneontology_Biological_Process	0.0115163	Up
GO:0009164	GO:0009164	nucleoside catabolic process	4/521	32/18866	0.0112044	0.102278	0.0845859	CDA/UPP1/APOBEC3H/PNP	4	geneontology_Biological_Process	0.00767754	Up
GO:0010165	GO:0010165	response to X-ray	4/521	32/18866	0.0112044	0.102278	0.0845859	HMGA2/CCND1/CDKN1A/ANXA1	4	geneontology_Biological_Process	0.00767754	Up
GO:0048841	GO:0048841	regulation of axon extension involved in axon guidance	4/521	32/18866	0.0112044	0.102278	0.0845859	SEMA6B/SEMA3F/WNT3/PLXNA4	4	geneontology_Biological_Process	0.00767754	Up
GO:0061036	GO:0061036	positive regulation of cartilage development	4/521	32/18866	0.0112044	0.102278	0.0845859	BMP1/LOXL2/MDK/RUNX2	4	geneontology_Biological_Process	0.00767754	Up
GO:0090092	GO:0090092	regulation of transmembrane receptor protein serine/threonine kinase signaling pathway	14/521	254/18866	0.0113059	0.102991	0.0851755	GDF15/CDKN2B/TGFB1/CITED1/TMPRSS6/LRG1/IGSF1/ITGA3/IL17RD/TGFBR1/VASN/FSTL3/CD109/INHBB	14	geneontology_Biological_Process	0.0268714	Up
GO:1902904	GO:1902904	negative regulation of supramolecular fiber organization	10/521	156/18866	0.0115008	0.104551	0.0864651	SPTBN2/BMERB1/EPS8/MET/TRIM54/CLIP3/TACSTD2/TMSB4X/STMN2/APOE	10	geneontology_Biological_Process	0.0191939	Up
GO:0001774	GO:0001774	microglial cell activation	5/521	50/18866	0.0120156	0.108559	0.0897804	LRRK2/CX3CL1/NR1D1/CTSC/TREM2	5	geneontology_Biological_Process	0.00959693	Up
GO:0002269	GO:0002269	leukocyte activation involved in inflammatory response	5/521	50/18866	0.0120156	0.108559	0.0897804	LRRK2/CX3CL1/NR1D1/CTSC/TREM2	5	geneontology_Biological_Process	0.00959693	Up
GO:0030195	GO:0030195	negative regulation of blood coagulation	5/521	50/18866	0.0120156	0.108559	0.0897804	PROS1/PLAU/PLAUR/ADTRP/APOE	5	geneontology_Biological_Process	0.00959693	Up
GO:0034754	GO:0034754	cellular hormone metabolic process	9/521	134/18866	0.01214	0.109459	0.0905242	ECE1/ADM/CYP2S1/ALDH1A3/RDH5/DHRS3/CYP1B1/CRABP2/SPP1	9	geneontology_Biological_Process	0.0172745	Up
GO:1901342	GO:1901342	regulation of vasculature development	21/521	444/18866	0.0121738	0.109539	0.0905908	HMGA2/PLXND1/HEY2/RUNX1/CX3CL1/CTSH/LRG1/TNFRSF12A/ADM/MDK/ADAMTS9/GPR4/FGF1/CHI3L1/ECM1/APLNR/CYP1B1/ALOX5/ANXA1/TMEM100/HLA-G	21	geneontology_Biological_Process	0.0403071	Up
GO:0051259	GO:0051259	protein complex oligomerization	13/521	231/18866	0.0122273	0.109797	0.0908037	RYR1/CLDN1/KCNJ2/TK1/STING1/ALDH1A3/KCNS3/SLC1A5/ADCY8/SYT1/PRMT8/HLA-G/AQP5	13	geneontology_Biological_Process	0.024952	Up
GO:0090022	GO:0090022	regulation of neutrophil chemotaxis	4/521	33/18866	0.0124778	0.111519	0.0922277	DPP4/DYSF/MDK/DAPK2	4	geneontology_Biological_Process	0.00767754	Up
GO:0071346	GO:0071346	cellular response to interferon-gamma	11/521	182/18866	0.012492	0.111519	0.0922277	CLDN1/CX3CL1/IRF5/ICAM1/CD44/CCL13/CCL20/CCL17/HLA-G/HLA-DQB2/CCL18	11	geneontology_Biological_Process	0.0211132	Up
GO:0045187	GO:0045187	regulation of circadian sleep/wake cycle, sleep	3/521	18/18866	0.0125455	0.111519	0.0922277	ADORA1/CSF2/NMU	3	geneontology_Biological_Process	0.00575816	Up
GO:0060004	GO:0060004	reflex	3/521	18/18866	0.0125455	0.111519	0.0922277	GLRB/ALDH1A3/HPN	3	geneontology_Biological_Process	0.00575816	Up
GO:0150078	GO:0150078	positive regulation of neuroinflammatory response	3/521	18/18866	0.0125455	0.111519	0.0922277	LRRK2/CTSC/TREM2	3	geneontology_Biological_Process	0.00575816	Up
GO:0050771	GO:0050771	negative regulation of axonogenesis	6/521	70/18866	0.0127261	0.112896	0.093367	LRP4/SEMA6B/SEMA3F/DRAXIN/WNT3/SPP1	6	geneontology_Biological_Process	0.0115163	Up
GO:0030177	GO:0030177	positive regulation of Wnt signaling pathway	11/521	183/18866	0.0129725	0.114422	0.0946287	CDH3/SCEL/TGFB1/LRRK2/SOX4/GPRC5B/WNT3/ARNTL/RSPO4/DEPDC1B/COL1A1	11	geneontology_Biological_Process	0.0211132	Up
GO:0120032	GO:0120032	regulation of plasma membrane bounded cell projection assembly	11/521	183/18866	0.0129725	0.114422	0.0946287	TENM1/EPS8/CDC42EP1/ESPN/ICAM1/TGFBR1/TACSTD2/GAP43/CDC42EP5/CDC42EP3/PALM	11	geneontology_Biological_Process	0.0211132	Up
GO:0033273	GO:0033273	response to vitamin	7/521	91/18866	0.0129759	0.114422	0.0946287	CCND1/ITGA2/ALPL/TNC/POSTN/COL1A1/SPP1	7	geneontology_Biological_Process	0.0134357	Up
GO:1902107	GO:1902107	positive regulation of leukocyte differentiation	10/521	159/18866	0.013018	0.114564	0.0947463	TGFB1/RUNX1/TESC/MDK/DCSTAMP/SOX4/TREM2/ANXA1/PNP/HLA-G	10	geneontology_Biological_Process	0.0191939	Up
GO:0001938	GO:0001938	positive regulation of endothelial cell proliferation	8/521	113/18866	0.0131102	0.115145	0.0952269	LRG1/DYSF/MDK/NRP2/TGFBR1/APLN/ECM1/APLNR	8	geneontology_Biological_Process	0.0153551	Up
GO:0007050	GO:0007050	cell cycle arrest	13/521	234/18866	0.0134951	0.118291	0.0978282	E2F1/HMGA2/CDKN2B/TGFB1/CCND1/SOX4/CDKN2A/SFN/CDKN1A/TGFBR1/BRINP1/MLXIPL/MUC1	13	geneontology_Biological_Process	0.024952	Up
GO:0050891	GO:0050891	multicellular organismal water homeostasis	6/521	71/18866	0.0135866	0.118604	0.0980873	GRHL3/CLDN1/MET/TMEM79/SFN/ADCY8	6	geneontology_Biological_Process	0.0115163	Up
GO:0050867	GO:0050867	positive regulation of cell activation	20/521	421/18866	0.0135915	0.118604	0.0980873	DPP4/TGFB1/LRRK2/RUNX1/MDK/SOX4/CDKN1A/CTSC/IGFBP2/EBI3/LGALS1/CRLF2/CD55/TREM2/ANXA1/PELI1/PNP/VTCN1/HLA-G/CD177	20	geneontology_Biological_Process	0.0383877	Up
GO:0043542	GO:0043542	endothelial cell migration	15/521	286/18866	0.0136121	0.118604	0.0980873	PTP4A3/PLXND1/DPP4/TGFB1/MET/LOXL2/ADAMTS9/NRP2/FGF1/TGFBR1/CYP1B1/TMSB4X/ADTRP/ANXA1/APOE	15	geneontology_Biological_Process	0.0287908	Up
GO:0007611	GO:0007611	learning or memory	14/521	260/18866	0.0136385	0.118604	0.0980873	RIN1/DLG4/STRA6/PPP1R1B/HRH1/UCN/MDK/ITGA3/RASGRF1/C1QL1/BRINP1/NPTX2/ADCY8/APOE	14	geneontology_Biological_Process	0.0268714	Up
GO:0003279	GO:0003279	cardiac septum development	8/521	114/18866	0.0137709	0.118717	0.0981811	PLXND1/HEY2/STRA6/NRP2/SOX4/PRDM1/TGFBR1/DHRS3	8	geneontology_Biological_Process	0.0153551	Up
GO:0070661	GO:0070661	leukocyte proliferation	16/521	313/18866	0.0138327	0.118717	0.0981811	SDC4/CX3CL1/CD151/LGALS3/CDKN1A/PDE5A/TNFRSF21/IGFBP2/EBI3/CD55/TREM2/ANXA1/PELI1/PNP/VTCN1/HLA-G	16	geneontology_Biological_Process	0.0307102	Up
GO:0043094	GO:0043094	cellular metabolic compound salvage	4/521	34/18866	0.01384	0.118717	0.0981811	CDA/UPP1/TK1/PNP	4	geneontology_Biological_Process	0.00767754	Up
GO:0045907	GO:0045907	positive regulation of vasoconstriction	4/521	34/18866	0.01384	0.118717	0.0981811	ADRA1B/HRH1/ICAM1/F2R	4	geneontology_Biological_Process	0.00767754	Up
GO:0070050	GO:0070050	neuron cellular homeostasis	4/521	34/18866	0.01384	0.118717	0.0981811	ADORA1/CX3CL1/TYRO3/NELL2	4	geneontology_Biological_Process	0.00767754	Up
GO:0099084	GO:0099084	postsynaptic specialization organization	4/521	34/18866	0.01384	0.118717	0.0981811	IL1RAP/CDH2/GAP43/CBLN1	4	geneontology_Biological_Process	0.00767754	Up
GO:1904030	GO:1904030	negative regulation of cyclin-dependent protein kinase activity	4/521	34/18866	0.01384	0.118717	0.0981811	CDKN2B/CAMK2N1/CDKN2A/CDKN1A	4	geneontology_Biological_Process	0.00767754	Up
GO:0060491	GO:0060491	regulation of cell projection assembly	11/521	185/18866	0.0139755	0.11895	0.0983738	TENM1/EPS8/CDC42EP1/ESPN/ICAM1/TGFBR1/TACSTD2/GAP43/CDC42EP5/CDC42EP3/PALM	11	geneontology_Biological_Process	0.0211132	Up
GO:2000045	GO:2000045	regulation of G1/S transition of mitotic cell cycle	11/521	185/18866	0.0139755	0.11895	0.0983738	E2F1/CDKN2B/BID/CCND1/CCND2/SOX4/CDKN2A/SFN/CDKN1A/ANXA1/MUC1	11	geneontology_Biological_Process	0.0211132	Up
GO:2001257	GO:2001257	regulation of cation channel activity	11/521	185/18866	0.0139755	0.11895	0.0983738	SCN1B/DLG4/DYSF/RASGRF1/STAC/CACNB1/CACNG4/CTSS/TMSB4X/TREM2/SHISA6	11	geneontology_Biological_Process	0.0211132	Up
GO:0021700	GO:0021700	developmental maturation	15/521	287/18866	0.014012	0.11895	0.0983738	CDH3/NRCAM/LRRK2/RYR1/DLG4/REN/CX3CL1/TMEM79/BAIAP3/C1QL1/CDKN1A/RUNX2/BNC1/PALM/GLDN	15	geneontology_Biological_Process	0.0287908	Up
GO:0060047	GO:0060047	heart contraction	15/521	287/18866	0.014012	0.11895	0.0983738	SCN1B/ADORA1/HEY2/RYR1/ADRA1B/HCN4/KCNJ2/SREBF1/UCN/ADM/NMU/PDE5A/CACNB1/APLN/CACNG4	15	geneontology_Biological_Process	0.0287908	Up
GO:0000186	GO:0000186	activation of MAPKK activity	5/521	52/18866	0.0140954	0.11895	0.0983738	ADORA1/MAP3K6/LRRK2/TGFBR1/F2R	5	geneontology_Biological_Process	0.00959693	Up
GO:0003179	GO:0003179	heart valve morphogenesis	5/521	52/18866	0.0140954	0.11895	0.0983738	HEY2/TGFB1/STRA6/ADAMTS9/SOX4	5	geneontology_Biological_Process	0.00959693	Up
GO:0071622	GO:0071622	regulation of granulocyte chemotaxis	5/521	52/18866	0.0140954	0.11895	0.0983738	DPP4/DYSF/MDK/CXCL17/DAPK2	5	geneontology_Biological_Process	0.00959693	Up
GO:0034767	GO:0034767	positive regulation of ion transmembrane transport	10/521	161/18866	0.01411	0.11895	0.0983738	KCNJ2/CX3CL1/TESC/STAC/F2R/CACNG4/APLNR/CTSS/TMSB4X/TREM2	10	geneontology_Biological_Process	0.0191939	Up
GO:0019058	GO:0019058	viral life cycle	17/521	341/18866	0.0142879	0.12022	0.0994238	HMGA2/NECTIN4/DPP4/CLDN1/TYRO3/CLDN9/XPR1/ITGA2/APOBEC3H/PC/ICAM1/FCN3/SLC1A5/LGALS1/CD55/APOE/SLPI	17	geneontology_Biological_Process	0.0326296	Up
GO:0043393	GO:0043393	regulation of protein binding	12/521	211/18866	0.0145633	0.121206	0.100239	PLXND1/LRRK2/TIAM1/MET/STING1/PHLDA2/CDKN1A/TGFBR1/APOE/SLPI/RAMP1/PRMT8	12	geneontology_Biological_Process	0.0230326	Up
GO:0010744	GO:0010744	positive regulation of macrophage derived foam cell differentiation	3/521	19/18866	0.0145975	0.121206	0.100239	CSF2/LPL/ALOX15B	3	geneontology_Biological_Process	0.00575816	Up
GO:0032674	GO:0032674	regulation of interleukin-5 production	3/521	19/18866	0.0145975	0.121206	0.100239	IL1RAP/TNFRSF21/CRLF2	3	geneontology_Biological_Process	0.00575816	Up
GO:0035988	GO:0035988	chondrocyte proliferation	3/521	19/18866	0.0145975	0.121206	0.100239	HMGA2/COMP/MMP16	3	geneontology_Biological_Process	0.00575816	Up
GO:0048486	GO:0048486	parasympathetic nervous system development	3/521	19/18866	0.0145975	0.121206	0.100239	SEMA3F/NRP2/PLXNA4	3	geneontology_Biological_Process	0.00575816	Up
GO:0060252	GO:0060252	positive regulation of glial cell proliferation	3/521	19/18866	0.0145975	0.121206	0.100239	E2F1/ETV5/PLAG1	3	geneontology_Biological_Process	0.00575816	Up
GO:0150146	GO:0150146	cell junction disassembly	3/521	19/18866	0.0145975	0.121206	0.100239	CX3CL1/TGFBR1/TREM2	3	geneontology_Biological_Process	0.00575816	Up
GO:2001236	GO:2001236	regulation of extrinsic apoptotic signaling pathway	10/521	162/18866	0.014681	0.12167	0.100623	BID/UNC5B/CSF2/CX3CL1/TNFRSF12A/LGALS3/ICAM1/TGFBR1/G0S2/PMAIP1	10	geneontology_Biological_Process	0.0191939	Up
GO:0007596	GO:0007596	blood coagulation	17/521	343/18866	0.0150513	0.124505	0.102968	ENTPD1/PROS1/FN1/SERPINA1/TYRO3/ITGA2/PLAU/RAB27A/COMP/F2R/DOCK9/PLAUR/ADTRP/ENTPD2/APOE/COL1A1/CD177	17	geneontology_Biological_Process	0.0326296	Up
GO:0032964	GO:0032964	collagen biosynthetic process	5/521	53/18866	0.0152205	0.124865	0.103265	TGFB1/UCN/ITGA2/F2R/COL1A1	5	geneontology_Biological_Process	0.00959693	Up
GO:0043392	GO:0043392	negative regulation of DNA binding	5/521	53/18866	0.0152205	0.124865	0.103265	E2F1/HMGA2/HEY2/MDFI/TMSB4X	5	geneontology_Biological_Process	0.00959693	Up
GO:0031214	GO:0031214	biomineral tissue development	10/521	163/18866	0.0152691	0.124865	0.103265	HEY2/TGFB1/KL/COMP/FAM20A/ECM1/ALPL/ALOX5/COL1A1/SPP1	10	geneontology_Biological_Process	0.0191939	Up
GO:0051494	GO:0051494	negative regulation of cytoskeleton organization	10/521	163/18866	0.0152691	0.124865	0.103265	SPTBN2/BMERB1/EPS8/MET/TRIM54/ESPN/CLIP3/TACSTD2/TMSB4X/STMN2	10	geneontology_Biological_Process	0.0191939	Up
GO:0110148	GO:0110148	biomineralization	10/521	163/18866	0.0152691	0.124865	0.103265	HEY2/TGFB1/KL/COMP/FAM20A/ECM1/ALPL/ALOX5/COL1A1/SPP1	10	geneontology_Biological_Process	0.0191939	Up
GO:0048333	GO:0048333	mesodermal cell differentiation	4/521	35/18866	0.0152931	0.124865	0.103265	HMGA2/ITGA2/ITGA3/ITGB4	4	geneontology_Biological_Process	0.00767754	Up
GO:1904031	GO:1904031	positive regulation of cyclin-dependent protein kinase activity	4/521	35/18866	0.0152931	0.124865	0.103265	CCND1/CCND2/CKS2/CDKN1A	4	geneontology_Biological_Process	0.00767754	Up
GO:0050870	GO:0050870	positive regulation of T cell activation	12/521	214/18866	0.0161091	0.131065	0.108393	DPP4/RUNX1/MDK/SOX4/IGFBP2/EBI3/LGALS1/CD55/ANXA1/PNP/VTCN1/HLA-G	12	geneontology_Biological_Process	0.0230326	Up
GO:0007589	GO:0007589	body fluid secretion	7/521	95/18866	0.0161416	0.131065	0.108393	ADORA1/CCND1/AGR2/UCN/KCNN4/APLN/AQP5	7	geneontology_Biological_Process	0.0134357	Up
GO:0050709	GO:0050709	negative regulation of protein secretion	7/521	95/18866	0.0161416	0.131065	0.108393	SRCIN1/SREBF1/F2R/ADTRP/ANXA1/APOE/INHBB	7	geneontology_Biological_Process	0.0134357	Up
GO:0070663	GO:0070663	regulation of leukocyte proliferation	13/521	240/18866	0.0163317	0.132365	0.109468	SDC4/LGALS3/CDKN1A/PDE5A/TNFRSF21/IGFBP2/EBI3/CD55/ANXA1/PELI1/PNP/VTCN1/HLA-G	13	geneontology_Biological_Process	0.024952	Up
GO:0007569	GO:0007569	cell aging	8/521	118/18866	0.0166581	0.13401	0.110829	HMGA2/CDKN2B/NOX4/CDKN2A/CDKN1A/ICAM1/ARNTL/HLA-G	8	geneontology_Biological_Process	0.0153551	Up
GO:0031290	GO:0031290	retinal ganglion cell axon guidance	3/521	20/18866	0.0168278	0.13401	0.110829	NRCAM/EPHB3/SLIT1	3	geneontology_Biological_Process	0.00575816	Up
GO:0032495	GO:0032495	response to muramyl dipeptide	3/521	20/18866	0.0168278	0.13401	0.110829	IRF5/NOD1/INAVA	3	geneontology_Biological_Process	0.00575816	Up
GO:0032634	GO:0032634	interleukin-5 production	3/521	20/18866	0.0168278	0.13401	0.110829	IL1RAP/TNFRSF21/CRLF2	3	geneontology_Biological_Process	0.00575816	Up
GO:0048670	GO:0048670	regulation of collateral sprouting	3/521	20/18866	0.0168278	0.13401	0.110829	WNT3/CRABP2/SPP1	3	geneontology_Biological_Process	0.00575816	Up
GO:0097503	GO:0097503	sialylation	3/521	20/18866	0.0168278	0.13401	0.110829	ST8SIA4/ST3GAL5/ST6GALNAC5	3	geneontology_Biological_Process	0.00575816	Up
GO:0097709	GO:0097709	connective tissue replacement	3/521	20/18866	0.0168278	0.13401	0.110829	TGFB1/TIMP1/F2R	3	geneontology_Biological_Process	0.00575816	Up
GO:2000774	GO:2000774	positive regulation of cellular senescence	3/521	20/18866	0.0168278	0.13401	0.110829	HMGA2/CDKN2A/HLA-G	3	geneontology_Biological_Process	0.00575816	Up
GO:0006213	GO:0006213	pyrimidine nucleoside metabolic process	4/521	36/18866	0.0168387	0.13401	0.110829	CDA/UPP1/TK1/APOBEC3H	4	geneontology_Biological_Process	0.00767754	Up
GO:0045742	GO:0045742	positive regulation of epidermal growth factor receptor signaling pathway	4/521	36/18866	0.0168387	0.13401	0.110829	ADORA1/TGFA/AGR2/PLAUR	4	geneontology_Biological_Process	0.00767754	Up
GO:0035249	GO:0035249	synaptic transmission, glutamatergic	7/521	96/18866	0.0170114	0.135141	0.111764	ADORA1/LRRK2/UCN/CDH2/CACNG4/GRM4/SYT1	7	geneontology_Biological_Process	0.0134357	Up
GO:0045765	GO:0045765	regulation of angiogenesis	19/521	403/18866	0.0170661	0.135177	0.111794	HMGA2/PLXND1/RUNX1/CX3CL1/CTSH/LRG1/TNFRSF12A/ADM/MDK/ADAMTS9/GPR4/FGF1/CHI3L1/ECM1/APLNR/CYP1B1/ALOX5/ANXA1/HLA-G	19	geneontology_Biological_Process	0.0364683	Up
GO:0007599	GO:0007599	hemostasis	17/521	348/18866	0.0170993	0.135177	0.111794	ENTPD1/PROS1/FN1/SERPINA1/TYRO3/ITGA2/PLAU/RAB27A/COMP/F2R/DOCK9/PLAUR/ADTRP/ENTPD2/APOE/COL1A1/CD177	17	geneontology_Biological_Process	0.0326296	Up
GO:0007093	GO:0007093	mitotic cell cycle checkpoint	10/521	166/18866	0.0171386	0.135177	0.111794	E2F1/HMGA2/CDKN2B/CDT1/TGFB1/CCND1/SOX4/SFN/CDKN1A/MUC1	10	geneontology_Biological_Process	0.0191939	Up
GO:1903531	GO:1903531	negative regulation of secretion by cell	10/521	166/18866	0.0171386	0.135177	0.111794	SRCIN1/ABR/ADORA1/SREBF1/UCN/F2R/ADTRP/ANXA1/APOE/INHBB	10	geneontology_Biological_Process	0.0191939	Up
GO:0033673	GO:0033673	negative regulation of kinase activity	14/521	268/18866	0.0173075	0.136257	0.112686	SRCIN1/CDKN2B/DUSP4/CAMK2N2/DUSP6/MVP/CAMK2N1/PPP1R1B/TESC/CDKN2A/SFN/CDKN1A/DUSP5/APOE	14	geneontology_Biological_Process	0.0268714	Up
GO:0010821	GO:0010821	regulation of mitochondrion organization	11/521	191/18866	0.0173372	0.136257	0.112686	BBC3/E2F1/BID/LRRK2/SREBF1/INF2/SFN/HRK/PLAUR/TREM2/PMAIP1	11	geneontology_Biological_Process	0.0211132	Up
GO:0010822	GO:0010822	positive regulation of mitochondrion organization	8/521	119/18866	0.0174432	0.136845	0.113173	BBC3/E2F1/BID/SFN/HRK/PLAUR/TREM2/PMAIP1	8	geneontology_Biological_Process	0.0153551	Up
GO:0050817	GO:0050817	coagulation	17/521	349/18866	0.0175337	0.137067	0.113357	ENTPD1/PROS1/FN1/SERPINA1/TYRO3/ITGA2/PLAU/RAB27A/COMP/F2R/DOCK9/PLAUR/ADTRP/ENTPD2/APOE/COL1A1/CD177	17	geneontology_Biological_Process	0.0326296	Up
GO:1904062	GO:1904062	regulation of cation transmembrane transport	17/521	349/18866	0.0175337	0.137067	0.113357	SCN1B/FXYD5/KCNJ2/DLG4/CX3CL1/TESC/DYSF/RASGRF1/STAC/CACNB1/F2R/CACNG4/APLNR/CTSS/TMSB4X/TREM2/SHISA6	17	geneontology_Biological_Process	0.0326296	Up
GO:0008347	GO:0008347	glial cell migration	5/521	55/18866	0.0176473	0.137226	0.113488	TIAM1/BMERB1/CX3CL1/CSPG4/TREM2	5	geneontology_Biological_Process	0.00959693	Up
GO:0050819	GO:0050819	negative regulation of coagulation	5/521	55/18866	0.0176473	0.137226	0.113488	PROS1/PLAU/PLAUR/ADTRP/APOE	5	geneontology_Biological_Process	0.00959693	Up
GO:0097345	GO:0097345	mitochondrial outer membrane permeabilization	5/521	55/18866	0.0176473	0.137226	0.113488	BBC3/E2F1/BID/SFN/PMAIP1	5	geneontology_Biological_Process	0.00959693	Up
GO:0097242	GO:0097242	amyloid-beta clearance	4/521	37/18866	0.0184785	0.143436	0.118624	LRP4/TREM2/APOE/MARCO	4	geneontology_Biological_Process	0.00767754	Up
GO:0002793	GO:0002793	positive regulation of peptide secretion	11/521	193/18866	0.0185819	0.143985	0.119078	ADORA1/TGFB1/BAIAP3/UCN/SOX4/KCNN4/C1QTNF12/NMU/APLN/ADCY8/TREM2	11	geneontology_Biological_Process	0.0211132	Up
GO:0006942	GO:0006942	regulation of striated muscle contraction	7/521	98/18866	0.0188495	0.145803	0.120581	ADORA1/ADRA1B/HCN4/KCNJ2/UCN/PDE5A/MYBPH	7	geneontology_Biological_Process	0.0134357	Up
GO:0006977	GO:0006977	DNA damage response, signal transduction by p53 class mediator resulting in cell cycle arrest	5/521	56/18866	0.0189512	0.146333	0.12102	E2F1/SOX4/SFN/CDKN1A/MUC1	5	geneontology_Biological_Process	0.00959693	Up
GO:0002065	GO:0002065	columnar/cuboidal epithelial cell differentiation	8/521	121/18866	0.0190927	0.146493	0.121152	JAG2/HEY2/AGR2/SOX4/PRDM1/CDH2/CDKN1A/ARNTL	8	geneontology_Biological_Process	0.0153551	Up
GO:0002029	GO:0002029	desensitization of G protein-coupled receptor signaling pathway	3/521	21/18866	0.0192378	0.146493	0.121152	ADM/APLN/APLNR	3	geneontology_Biological_Process	0.00575816	Up
GO:0019370	GO:0019370	leukotriene biosynthetic process	3/521	21/18866	0.0192378	0.146493	0.121152	GGT6/GGT2/ALOX5	3	geneontology_Biological_Process	0.00575816	Up
GO:0022401	GO:0022401	negative adaptation of signaling pathway	3/521	21/18866	0.0192378	0.146493	0.121152	ADM/APLN/APLNR	3	geneontology_Biological_Process	0.00575816	Up
GO:0042107	GO:0042107	cytokine metabolic process	3/521	21/18866	0.0192378	0.146493	0.121152	TNFSF15/IGF2BP2/INHBB	3	geneontology_Biological_Process	0.00575816	Up
GO:0072574	GO:0072574	hepatocyte proliferation	3/521	21/18866	0.0192378	0.146493	0.121152	MDK/FGF1/HPN	3	geneontology_Biological_Process	0.00575816	Up
GO:0072575	GO:0072575	epithelial cell proliferation involved in liver morphogenesis	3/521	21/18866	0.0192378	0.146493	0.121152	MDK/FGF1/HPN	3	geneontology_Biological_Process	0.00575816	Up
GO:0098698	GO:0098698	postsynaptic specialization assembly	3/521	21/18866	0.0192378	0.146493	0.121152	IL1RAP/GAP43/CBLN1	3	geneontology_Biological_Process	0.00575816	Up
GO:0070830	GO:0070830	bicellular tight junction assembly	6/521	77/18866	0.0196147	0.148849	0.123101	CLDN16/CLDN1/RUNX1/CLDN9/CLDN10/CLDN2	6	geneontology_Biological_Process	0.0115163	Up
GO:0150076	GO:0150076	neuroinflammatory response	6/521	77/18866	0.0196147	0.148849	0.123101	LRRK2/CX3CL1/NR1D1/CTSC/ADCY8/TREM2	6	geneontology_Biological_Process	0.0115163	Up
GO:0090277	GO:0090277	positive regulation of peptide hormone secretion	7/521	99/18866	0.0198189	0.15014	0.124168	BAIAP3/UCN/SOX4/C1QTNF12/NMU/APLN/ADCY8	7	geneontology_Biological_Process	0.0134357	Up
GO:0048813	GO:0048813	dendrite morphogenesis	9/521	146/18866	0.0201998	0.151313	0.125139	SRCIN1/LRP4/NGEF/EPHB3/LRRK2/TIAM1/DLG4/LZTS1/TRPC5	9	geneontology_Biological_Process	0.0172745	Up
GO:0010742	GO:0010742	macrophage derived foam cell differentiation	4/521	38/18866	0.0202141	0.151313	0.125139	TGFB1/CSF2/LPL/ALOX15B	4	geneontology_Biological_Process	0.00767754	Up
GO:0051930	GO:0051930	regulation of sensory perception of pain	4/521	38/18866	0.0202141	0.151313	0.125139	ADORA1/NMU/F2R/TMEM100	4	geneontology_Biological_Process	0.00767754	Up
GO:0090077	GO:0090077	foam cell differentiation	4/521	38/18866	0.0202141	0.151313	0.125139	TGFB1/CSF2/LPL/ALOX15B	4	geneontology_Biological_Process	0.00767754	Up
GO:1901186	GO:1901186	positive regulation of ERBB signaling pathway	4/521	38/18866	0.0202141	0.151313	0.125139	ADORA1/TGFA/AGR2/PLAUR	4	geneontology_Biological_Process	0.00767754	Up
GO:0061178	GO:0061178	regulation of insulin secretion involved in cellular response to glucose stimulus	5/521	57/18866	0.020317	0.151313	0.125139	TIAM1/BAIAP3/NR1D1/C1QTNF12/ADCY8	5	geneontology_Biological_Process	0.00959693	Up
GO:0071398	GO:0071398	cellular response to fatty acid	5/521	57/18866	0.020317	0.151313	0.125139	E2F1/CLDN1/SREBF1/LPL/TNC	5	geneontology_Biological_Process	0.00959693	Up
GO:0072431	GO:0072431	signal transduction involved in mitotic G1 DNA damage checkpoint	5/521	57/18866	0.020317	0.151313	0.125139	E2F1/SOX4/SFN/CDKN1A/MUC1	5	geneontology_Biological_Process	0.00959693	Up
GO:1902400	GO:1902400	intracellular signal transduction involved in G1 DNA damage checkpoint	5/521	57/18866	0.020317	0.151313	0.125139	E2F1/SOX4/SFN/CDKN1A/MUC1	5	geneontology_Biological_Process	0.00959693	Up
GO:1905517	GO:1905517	macrophage migration	5/521	57/18866	0.020317	0.151313	0.125139	CX3CL1/MDK/LGALS3/CXCL17/TREM2	5	geneontology_Biological_Process	0.00959693	Up
GO:0050728	GO:0050728	negative regulation of inflammatory response	11/521	196/18866	0.0205715	0.152816	0.126382	ABR/ADORA1/CX3CL1/TYRO3/NR1D1/MDK/FNDC4/C1QTNF12/CXCL17/ALOX5/APOE	11	geneontology_Biological_Process	0.0211132	Up
GO:0007584	GO:0007584	response to nutrient	10/521	171/18866	0.0206227	0.152816	0.126382	CDKN2B/CCND1/LPL/ITGA2/IGFBP2/ALPL/TNC/POSTN/COL1A1/SPP1	10	geneontology_Biological_Process	0.0191939	Up
GO:0030856	GO:0030856	regulation of epithelial cell differentiation	10/521	171/18866	0.0206227	0.152816	0.126382	ETV4/HEY2/CCND1/RUNX1/CITED1/SFN/ALOX15B/CD109/ARNTL/TMEM100	10	geneontology_Biological_Process	0.0191939	Up
GO:0060998	GO:0060998	regulation of dendritic spine development	6/521	78/18866	0.0207711	0.153657	0.127077	SRCIN1/NGEF/LRRK2/TIAM1/SDK1/APOE	6	geneontology_Biological_Process	0.0115163	Up
GO:0045807	GO:0045807	positive regulation of endocytosis	7/521	100/18866	0.0208225	0.15373	0.127137	LRRK2/ITGA2/CD151/CLIP3/APLN/TREM2/APOE	7	geneontology_Biological_Process	0.0134357	Up
GO:1904375	GO:1904375	regulation of protein localization to cell periphery	8/521	123/18866	0.0208506	0.15373	0.127137	TGFB1/AGR2/LGALS3/ITGA3/CLIP3/STAC/MISP/TREM2	8	geneontology_Biological_Process	0.0153551	Up
GO:0007043	GO:0007043	cell-cell junction assembly	9/521	147/18866	0.0210122	0.154662	0.127908	CLDN16/CDH6/CLDN1/RUNX1/CLDN9/GJA4/CLDN10/CLDN2/CDH22	9	geneontology_Biological_Process	0.0172745	Up
GO:0050806	GO:0050806	positive regulation of synaptic transmission	10/521	172/18866	0.0213773	0.156025	0.129035	ADORA1/DLG4/SYT12/BAIAP3/NMU/CACNG4/ADCY8/RETN/APOE/SYT1	10	geneontology_Biological_Process	0.0191939	Up
GO:0031349	GO:0031349	positive regulation of defense response	18/521	385/18866	0.0214272	0.156025	0.129035	LRRK2/CX3CL1/STING1/UCN/LPL/ITGA2/MDK/GPR4/KLK7/MUC21/GPRC5B/NOD1/CTSC/TGM2/C2CD4A/TREM2/MUC1/HLA-G	18	geneontology_Biological_Process	0.0345489	Up
GO:0002763	GO:0002763	positive regulation of myeloid leukocyte differentiation	5/521	58/18866	0.0217455	0.156025	0.129035	TGFB1/RUNX1/TESC/DCSTAMP/TREM2	5	geneontology_Biological_Process	0.00959693	Up
GO:1903749	GO:1903749	positive regulation of establishment of protein localization to mitochondrion	5/521	58/18866	0.0217455	0.156025	0.129035	BBC3/E2F1/BID/SFN/PMAIP1	5	geneontology_Biological_Process	0.00959693	Up
GO:0001573	GO:0001573	ganglioside metabolic process	3/521	22/18866	0.0218282	0.156025	0.129035	ST8SIA4/ST3GAL5/ST6GALNAC5	3	geneontology_Biological_Process	0.00575816	Up
GO:0023058	GO:0023058	adaptation of signaling pathway	3/521	22/18866	0.0218282	0.156025	0.129035	ADM/APLN/APLNR	3	geneontology_Biological_Process	0.00575816	Up
GO:0035970	GO:0035970	peptidyl-threonine dephosphorylation	3/521	22/18866	0.0218282	0.156025	0.129035	DUSP4/DUSP6/DUSP5	3	geneontology_Biological_Process	0.00575816	Up
GO:0050802	GO:0050802	circadian sleep/wake cycle, sleep	3/521	22/18866	0.0218282	0.156025	0.129035	ADORA1/CSF2/NMU	3	geneontology_Biological_Process	0.00575816	Up
GO:0072576	GO:0072576	liver morphogenesis	3/521	22/18866	0.0218282	0.156025	0.129035	MDK/FGF1/HPN	3	geneontology_Biological_Process	0.00575816	Up
GO:0099633	GO:0099633	protein localization to postsynaptic specialization membrane	3/521	22/18866	0.0218282	0.156025	0.129035	DLG4/CACNG4/SHISA6	3	geneontology_Biological_Process	0.00575816	Up
GO:0099645	GO:0099645	neurotransmitter receptor localization to postsynaptic specialization membrane	3/521	22/18866	0.0218282	0.156025	0.129035	DLG4/CACNG4/SHISA6	3	geneontology_Biological_Process	0.00575816	Up
GO:0002792	GO:0002792	negative regulation of peptide secretion	7/521	101/18866	0.021861	0.156025	0.129035	SRCIN1/SREBF1/F2R/ADTRP/ANXA1/APOE/INHBB	7	geneontology_Biological_Process	0.0134357	Up
GO:0007215	GO:0007215	glutamate receptor signaling pathway	7/521	101/18866	0.021861	0.156025	0.129035	TIAM1/DLG4/CX3CL1/RASGRF1/CACNG4/GRM4/SHISA6	7	geneontology_Biological_Process	0.0134357	Up
GO:0042116	GO:0042116	macrophage activation	7/521	101/18866	0.021861	0.156025	0.129035	LRRK2/CSF2/CX3CL1/DYSF/NR1D1/CTSC/TREM2	7	geneontology_Biological_Process	0.0134357	Up
GO:0044773	GO:0044773	mitotic DNA damage checkpoint	7/521	101/18866	0.021861	0.156025	0.129035	E2F1/HMGA2/CCND1/SOX4/SFN/CDKN1A/MUC1	7	geneontology_Biological_Process	0.0134357	Up
GO:0007492	GO:0007492	endoderm development	6/521	79/18866	0.0219728	0.156025	0.129035	HMGA2/DUSP4/FN1/LAMB3/COL8A1/DUSP5	6	geneontology_Biological_Process	0.0115163	Up
GO:0030104	GO:0030104	water homeostasis	6/521	79/18866	0.0219728	0.156025	0.129035	GRHL3/CLDN1/MET/TMEM79/SFN/ADCY8	6	geneontology_Biological_Process	0.0115163	Up
GO:0050672	GO:0050672	negative regulation of lymphocyte proliferation	6/521	79/18866	0.0219728	0.156025	0.129035	SDC4/PDE5A/TNFRSF21/PELI1/VTCN1/HLA-G	6	geneontology_Biological_Process	0.0115163	Up
GO:0090398	GO:0090398	cellular senescence	6/521	79/18866	0.0219728	0.156025	0.129035	HMGA2/CDKN2B/CDKN2A/CDKN1A/ARNTL/HLA-G	6	geneontology_Biological_Process	0.0115163	Up
GO:0099601	GO:0099601	regulation of neurotransmitter receptor activity	6/521	79/18866	0.0219728	0.156025	0.129035	DLG4/NPTXR/RASGRF1/NPTX2/CACNG4/SHISA6	6	geneontology_Biological_Process	0.0115163	Up
GO:0120192	GO:0120192	tight junction assembly	6/521	79/18866	0.0219728	0.156025	0.129035	CLDN16/CLDN1/RUNX1/CLDN9/CLDN10/CLDN2	6	geneontology_Biological_Process	0.0115163	Up
GO:0010837	GO:0010837	regulation of keratinocyte proliferation	4/521	39/18866	0.0220466	0.156025	0.129035	CDH3/MDK/SFN/CD109	4	geneontology_Biological_Process	0.00767754	Up
GO:0031111	GO:0031111	negative regulation of microtubule polymerization or depolymerization	4/521	39/18866	0.0220466	0.156025	0.129035	BMERB1/TRIM54/CLIP3/STMN2	4	geneontology_Biological_Process	0.00767754	Up
GO:0051931	GO:0051931	regulation of sensory perception	4/521	39/18866	0.0220466	0.156025	0.129035	ADORA1/NMU/F2R/TMEM100	4	geneontology_Biological_Process	0.00767754	Up
GO:0060562	GO:0060562	epithelial tube morphogenesis	16/521	331/18866	0.022139	0.156268	0.129236	PLXND1/GRHL3/ETV5/TGFB1/SPINT1/MTHFD1L/CITED1/SDC4/MET/CTSH/ADM/MDK/FGF1/SOX4/TACSTD2/TNC	16	geneontology_Biological_Process	0.0307102	Up
GO:0006937	GO:0006937	regulation of muscle contraction	10/521	173/18866	0.0221518	0.156268	0.129236	ADORA1/ADRA1B/HCN4/KCNJ2/UCN/ITGA2/NMU/PDE5A/F2R/MYBPH	10	geneontology_Biological_Process	0.0191939	Up
GO:0007178	GO:0007178	transmembrane receptor protein serine/threonine kinase signaling pathway	17/521	359/18866	0.0223602	0.157486	0.130243	GDF15/CDKN2B/TGFB1/CITED1/TMPRSS6/LRG1/IGSF1/ITGA3/IL17RD/COMP/TGFBR1/VASN/RUNX2/FSTL3/CD109/TMEM100/INHBB	17	geneontology_Biological_Process	0.0326296	Up
GO:0001935	GO:0001935	endothelial cell proliferation	11/521	199/18866	0.0227139	0.159513	0.13192	LOXL2/LRG1/DYSF/MDK/NRP2/TGFBR1/APLN/ECM1/APLNR/ALOX5/APOE	11	geneontology_Biological_Process	0.0211132	Up
GO:0008637	GO:0008637	apoptotic mitochondrial changes	8/521	125/18866	0.0227204	0.159513	0.13192	BBC3/E2F1/BID/GGCT/SFN/HRK/PLAUR/PMAIP1	8	geneontology_Biological_Process	0.0153551	Up
GO:1903076	GO:1903076	regulation of protein localization to plasma membrane	7/521	102/18866	0.0229348	0.160762	0.132953	TGFB1/AGR2/LGALS3/ITGA3/CLIP3/STAC/TREM2	7	geneontology_Biological_Process	0.0134357	Up
GO:0032945	GO:0032945	negative regulation of mononuclear cell proliferation	6/521	80/18866	0.0232206	0.160776	0.132964	SDC4/PDE5A/TNFRSF21/PELI1/VTCN1/HLA-G	6	geneontology_Biological_Process	0.0115163	Up
GO:1901224	GO:1901224	positive regulation of NIK/NF-kappaB signaling	6/521	80/18866	0.0232206	0.160776	0.132964	PTP4A3/NOD1/CHI3L1/TNFSF15/TCIM/TREM2	6	geneontology_Biological_Process	0.0115163	Up
GO:0043030	GO:0043030	regulation of macrophage activation	5/521	59/18866	0.0232377	0.160776	0.132964	LRRK2/CX3CL1/NR1D1/CTSC/TREM2	5	geneontology_Biological_Process	0.00959693	Up
GO:0046456	GO:0046456	icosanoid biosynthetic process	5/521	59/18866	0.0232377	0.160776	0.132964	ALOX15B/GGT6/GGT2/ALOX5/ANXA1	5	geneontology_Biological_Process	0.00959693	Up
GO:0051289	GO:0051289	protein homotetramerization	5/521	59/18866	0.0232377	0.160776	0.132964	RYR1/KCNJ2/TK1/ALDH1A3/AQP5	5	geneontology_Biological_Process	0.00959693	Up
GO:0072413	GO:0072413	signal transduction involved in mitotic cell cycle checkpoint	5/521	59/18866	0.0232377	0.160776	0.132964	E2F1/SOX4/SFN/CDKN1A/MUC1	5	geneontology_Biological_Process	0.00959693	Up
GO:1902402	GO:1902402	signal transduction involved in mitotic DNA damage checkpoint	5/521	59/18866	0.0232377	0.160776	0.132964	E2F1/SOX4/SFN/CDKN1A/MUC1	5	geneontology_Biological_Process	0.00959693	Up
GO:1902403	GO:1902403	signal transduction involved in mitotic DNA integrity checkpoint	5/521	59/18866	0.0232377	0.160776	0.132964	E2F1/SOX4/SFN/CDKN1A/MUC1	5	geneontology_Biological_Process	0.00959693	Up
GO:0006486	GO:0006486	protein glycosylation	13/521	252/18866	0.0233378	0.160776	0.132964	TUSC3/GALNT7/B3GNT7/B3GNT8/B3GNT3/ST8SIA4/B3GAT1/MUC21/ST3GAL5/MGAT3/ST6GALNAC5/RAMP1/MUC1	13	geneontology_Biological_Process	0.024952	Up
GO:0043122	GO:0043122	regulation of I-kappaB kinase/NF-kappaB signaling	13/521	252/18866	0.0233378	0.160776	0.132964	CX3CL1/NR1D1/UNC5CL/EDA2R/GPRC5B/NOD1/F2R/ECM1/TGM2/INAVA/LGALS1/LURAP1L/PELI1	13	geneontology_Biological_Process	0.024952	Up
GO:0043413	GO:0043413	macromolecule glycosylation	13/521	252/18866	0.0233378	0.160776	0.132964	TUSC3/GALNT7/B3GNT7/B3GNT8/B3GNT3/ST8SIA4/B3GAT1/MUC21/ST3GAL5/MGAT3/ST6GALNAC5/RAMP1/MUC1	13	geneontology_Biological_Process	0.024952	Up
GO:2000134	GO:2000134	negative regulation of G1/S transition of mitotic cell cycle	8/521	126/18866	0.0236983	0.163004	0.134807	E2F1/CDKN2B/CCND1/SOX4/CDKN2A/SFN/CDKN1A/MUC1	8	geneontology_Biological_Process	0.0153551	Up
GO:0008630	GO:0008630	intrinsic apoptotic signaling pathway in response to DNA damage	7/521	103/18866	0.0240444	0.165128	0.136563	PHLDA3/E2F1/BID/SFN/CDKN1A/CD44/MUC1	7	geneontology_Biological_Process	0.0134357	Up
GO:0016331	GO:0016331	morphogenesis of embryonic epithelium	9/521	151/18866	0.0244974	0.166348	0.137572	JAG2/GRHL3/TGFB1/SPINT1/MTHFD1L/SDC4/ADM/ALDH1A3/SOX4	9	geneontology_Biological_Process	0.0172745	Up
GO:0071158	GO:0071158	positive regulation of cell cycle arrest	6/521	81/18866	0.024515	0.166348	0.137572	E2F1/HMGA2/SOX4/SFN/CDKN1A/MUC1	6	geneontology_Biological_Process	0.0115163	Up
GO:0043687	GO:0043687	post-translational protein modification	17/521	363/18866	0.0245511	0.166348	0.137572	DDB2/FN1/SERPINA1/FOLH1/MFGE8/TIMP1/VWA1/PRSS23/QSOX1/CDH2/EVA1A/MXRA8/LGALS1/FSTL3/APOE/TNC/SPP1	17	geneontology_Biological_Process	0.0326296	Up
GO:0007413	GO:0007413	axonal fasciculation	3/521	23/18866	0.0245994	0.166348	0.137572	NRCAM/EPHB3/TNFRSF21	3	geneontology_Biological_Process	0.00575816	Up
GO:0046135	GO:0046135	pyrimidine nucleoside catabolic process	3/521	23/18866	0.0245994	0.166348	0.137572	CDA/UPP1/APOBEC3H	3	geneontology_Biological_Process	0.00575816	Up
GO:0071577	GO:0071577	zinc ion transmembrane transport	3/521	23/18866	0.0245994	0.166348	0.137572	TMEM163/SLC30A2/SLC30A3	3	geneontology_Biological_Process	0.00575816	Up
GO:0086012	GO:0086012	membrane depolarization during cardiac muscle cell action potential	3/521	23/18866	0.0245994	0.166348	0.137572	SCN1B/HCN4/KCNJ2	3	geneontology_Biological_Process	0.00575816	Up
GO:0090343	GO:0090343	positive regulation of cell aging	3/521	23/18866	0.0245994	0.166348	0.137572	HMGA2/CDKN2A/HLA-G	3	geneontology_Biological_Process	0.00575816	Up
GO:0106030	GO:0106030	neuron projection fasciculation	3/521	23/18866	0.0245994	0.166348	0.137572	NRCAM/EPHB3/TNFRSF21	3	geneontology_Biological_Process	0.00575816	Up
GO:1904996	GO:1904996	positive regulation of leukocyte adhesion to vascular endothelial cell	3/521	23/18866	0.0245994	0.166348	0.137572	MDK/ICAM1/ALOX5	3	geneontology_Biological_Process	0.00575816	Up
GO:0045926	GO:0045926	negative regulation of growth	13/521	254/18866	0.0246941	0.166645	0.137818	GDF15/CDA/TGFB1/SEMA6B/SEMA3F/TMPRSS4/DRAXIN/DCSTAMP/WNT3/CDKN2A/CDKN1A/ALOX15B/SPP1	13	geneontology_Biological_Process	0.024952	Up
GO:0035904	GO:0035904	aorta development	5/521	60/18866	0.0247946	0.166645	0.137818	PLXND1/HEY2/ADAMTS9/SOX4/PRDM1	5	geneontology_Biological_Process	0.00959693	Up
GO:0061900	GO:0061900	glial cell activation	5/521	60/18866	0.0247946	0.166645	0.137818	LRRK2/CX3CL1/NR1D1/CTSC/TREM2	5	geneontology_Biological_Process	0.00959693	Up
GO:0097755	GO:0097755	positive regulation of blood vessel diameter	5/521	60/18866	0.0247946	0.166645	0.137818	ADORA1/UCN/ADM/APLN/APOE	5	geneontology_Biological_Process	0.00959693	Up
GO:0048705	GO:0048705	skeletal system morphogenesis	12/521	228/18866	0.0250076	0.167821	0.138791	COL13A1/BMP1/MTHFD1L/NAB2/MDFI/COMP/TGFBR1/DHRS3/MMP16/RUNX2/ALPL/COL1A1	12	geneontology_Biological_Process	0.0230326	Up
GO:0032231	GO:0032231	regulation of actin filament bundle assembly	7/521	104/18866	0.0251905	0.168535	0.139381	FHOD1/NOX4/SDC4/CX3CL1/MET/TGFBR1/TACSTD2	7	geneontology_Biological_Process	0.0134357	Up
GO:0043279	GO:0043279	response to alkaloid	7/521	104/18866	0.0251905	0.168535	0.139381	RYR1/TIAM1/PPP1R1B/ICAM1/CACNG4/ADCY8/SDK1	7	geneontology_Biological_Process	0.0134357	Up
GO:0030193	GO:0030193	regulation of blood coagulation	6/521	82/18866	0.0258568	0.172731	0.142851	PROS1/PLAU/F2R/PLAUR/ADTRP/APOE	6	geneontology_Biological_Process	0.0115163	Up
GO:0044843	GO:0044843	cell cycle G1/S phase transition	15/521	310/18866	0.0259727	0.172982	0.143059	E2F1/CDKN2B/BID/CDT1/CCND1/CCND2/SOX4/CDKN2A/SFN/CDKN1A/TCIM/PLPP2/CCNA1/ANXA1/MUC1	15	geneontology_Biological_Process	0.0287908	Up
GO:0090287	GO:0090287	regulation of cellular response to growth factor stimulus	15/521	310/18866	0.0259727	0.172982	0.143059	PTP4A3/CDKN2B/TGFB1/CITED1/TMPRSS6/LRG1/ITGA3/FGF1/IL17RD/TGFBR1/APLN/VASN/RUNX2/FSTL3/CD109	15	geneontology_Biological_Process	0.0287908	Up
GO:0046651	GO:0046651	lymphocyte proliferation	14/521	283/18866	0.0261556	0.173936	0.143848	SDC4/CD151/LGALS3/CDKN1A/PDE5A/TNFRSF21/IGFBP2/EBI3/CD55/ANXA1/PELI1/PNP/VTCN1/HLA-G	14	geneontology_Biological_Process	0.0268714	Up
GO:1903829	GO:1903829	positive regulation of cellular protein localization	16/521	338/18866	0.0262312	0.174177	0.144047	BBC3/LRP4/E2F1/BID/TENM1/CDT1/TGFB1/AGR2/LGALS3/ITGA3/MGAT3/SFN/CLIP3/STAC/TREM2/PMAIP1	16	geneontology_Biological_Process	0.0307102	Up
GO:0051260	GO:0051260	protein homooligomerization	10/521	178/18866	0.0263322	0.174359	0.144198	RYR1/KCNJ2/TK1/ALDH1A3/KCNS3/SLC1A5/ADCY8/PRMT8/HLA-G/AQP5	10	geneontology_Biological_Process	0.0191939	Up
GO:0006027	GO:0006027	glycosaminoglycan catabolic process	5/521	61/18866	0.0264168	0.174359	0.144198	TGFB1/SDC4/SDC3/CD44/CSPG4	5	geneontology_Biological_Process	0.00959693	Up
GO:0046847	GO:0046847	filopodium assembly	5/521	61/18866	0.0264168	0.174359	0.144198	TENM1/ESPN/TGFBR1/GAP43/PALM	5	geneontology_Biological_Process	0.00959693	Up
GO:1902110	GO:1902110	positive regulation of mitochondrial membrane permeability involved in apoptotic process	5/521	61/18866	0.0264168	0.174359	0.144198	BBC3/E2F1/BID/SFN/PMAIP1	5	geneontology_Biological_Process	0.00959693	Up
GO:0010001	GO:0010001	glial cell differentiation	12/521	230/18866	0.0265251	0.174551	0.144356	TGFB1/SPINT1/NAB2/NR1D1/MDK/SOX4/CDH2/TNFRSF21/GAP43/MXRA8/TREM2/ERBB3	12	geneontology_Biological_Process	0.0230326	Up
GO:0051495	GO:0051495	positive regulation of cytoskeleton organization	12/521	230/18866	0.0265251	0.174551	0.144356	TENM1/FHOD1/NOX4/SDC4/CX3CL1/MET/CDC42EP1/ICAM1/TGFBR1/CDC42EP5/CDC42EP3/STMN2	12	geneontology_Biological_Process	0.0230326	Up
GO:0031334	GO:0031334	positive regulation of protein-containing complex assembly	13/521	257/18866	0.0268365	0.176337	0.145833	BID/DDB2/TENM1/CDT1/TGFB1/CSF2/MET/LGALS3/CDC42EP1/ICAM1/CDC42EP5/CDC42EP3/HRK	13	geneontology_Biological_Process	0.024952	Up
GO:0048469	GO:0048469	cell maturation	10/521	179/18866	0.0272316	0.178234	0.147403	NRCAM/LRRK2/REN/CX3CL1/TMEM79/C1QL1/CDKN1A/RUNX2/BNC1/GLDN	10	geneontology_Biological_Process	0.0191939	Up
GO:0001570	GO:0001570	vasculogenesis	6/521	83/18866	0.0272465	0.178234	0.147403	HEY2/TGFB1/CITED1/ADM/APLNR/TMEM100	6	geneontology_Biological_Process	0.0115163	Up
GO:0055117	GO:0055117	regulation of cardiac muscle contraction	6/521	83/18866	0.0272465	0.178234	0.147403	ADORA1/ADRA1B/HCN4/KCNJ2/UCN/PDE5A	6	geneontology_Biological_Process	0.0115163	Up
GO:0003272	GO:0003272	endocardial cushion formation	3/521	24/18866	0.0275511	0.179175	0.148181	HEY2/TGFBR1/TMEM100	3	geneontology_Biological_Process	0.00575816	Up
GO:0030325	GO:0030325	adrenal gland development	3/521	24/18866	0.0275511	0.179175	0.148181	STRA6/MDK/FSTL3	3	geneontology_Biological_Process	0.00575816	Up
GO:0034505	GO:0034505	tooth mineralization	3/521	24/18866	0.0275511	0.179175	0.148181	FAM20A/ALPL/COL1A1	3	geneontology_Biological_Process	0.00575816	Up
GO:0001841	GO:0001841	neural tube formation	7/521	106/18866	0.0275935	0.179175	0.148181	GRHL3/TGFB1/SPINT1/MTHFD1L/SDC4/ADM/SOX4	7	geneontology_Biological_Process	0.0134357	Up
GO:0014812	GO:0014812	muscle cell migration	7/521	106/18866	0.0275935	0.179175	0.148181	S100A11/NOX4/ITGA2/MDK/PLAU/ANXA1/POSTN	7	geneontology_Biological_Process	0.0134357	Up
GO:0040013	GO:0040013	negative regulation of locomotion	18/521	397/18866	0.0279703	0.180842	0.14956	ABR/ADORA1/DPP4/TGFB1/SEMA6B/BMERB1/SEMA3F/CX3CL1/TIMP1/ADAMTS9/ARHGDIB/WNT3/ALOX15B/TACSTD2/FRMD5/CYP1B1/ADTRP/APOE	18	geneontology_Biological_Process	0.0345489	Up
GO:0032233	GO:0032233	positive regulation of actin filament bundle assembly	5/521	62/18866	0.0281053	0.180842	0.14956	FHOD1/NOX4/SDC4/CX3CL1/TGFBR1	5	geneontology_Biological_Process	0.00959693	Up
GO:0034113	GO:0034113	heterotypic cell-cell adhesion	5/521	62/18866	0.0281053	0.180842	0.14956	NRCAM/PERP/CD44/CEACAM6/GLDN	5	geneontology_Biological_Process	0.00959693	Up
GO:0051851	GO:0051851	modulation by host of symbiont process	5/521	62/18866	0.0281053	0.180842	0.14956	HMGA2/PC/POU2F3/APOE/HPN	5	geneontology_Biological_Process	0.00959693	Up
GO:0048246	GO:0048246	macrophage chemotaxis	4/521	42/18866	0.0281374	0.180842	0.14956	CX3CL1/MDK/LGALS3/CXCL17	4	geneontology_Biological_Process	0.00767754	Up
GO:1901658	GO:1901658	glycosyl compound catabolic process	4/521	42/18866	0.0281374	0.180842	0.14956	CDA/UPP1/APOBEC3H/PNP	4	geneontology_Biological_Process	0.00767754	Up
GO:1902622	GO:1902622	regulation of neutrophil migration	4/521	42/18866	0.0281374	0.180842	0.14956	DPP4/DYSF/MDK/DAPK2	4	geneontology_Biological_Process	0.00767754	Up
GO:0032943	GO:0032943	mononuclear cell proliferation	14/521	286/18866	0.0282673	0.181413	0.150031	SDC4/CD151/LGALS3/CDKN1A/PDE5A/TNFRSF21/IGFBP2/EBI3/CD55/ANXA1/PELI1/PNP/VTCN1/HLA-G	14	geneontology_Biological_Process	0.0268714	Up
GO:0048754	GO:0048754	branching morphogenesis of an epithelial tube	9/521	155/18866	0.0283754	0.181841	0.150386	PLXND1/ETV5/CITED1/MET/CTSH/MDK/FGF1/TACSTD2/TNC	9	geneontology_Biological_Process	0.0172745	Up
GO:0030330	GO:0030330	DNA damage response, signal transduction by p53 class mediator	7/521	107/18866	0.0288515	0.18409	0.152245	E2F1/SOX4/SFN/CDKN1A/CD44/PMAIP1/MUC1	7	geneontology_Biological_Process	0.0134357	Up
GO:0034404	GO:0034404	nucleobase-containing small molecule biosynthetic process	7/521	107/18866	0.0288515	0.18409	0.152245	CDA/UPP1/PDE9A/TK1/PDE5A/ENTPD2/PNP	7	geneontology_Biological_Process	0.0134357	Up
GO:0050905	GO:0050905	neuromuscular process	7/521	107/18866	0.0288515	0.18409	0.152245	ABR/DLG4/STRA6/GLRB/UCN/ALDH1A3/COMP	7	geneontology_Biological_Process	0.0134357	Up
GO:0048592	GO:0048592	eye morphogenesis	9/521	156/18866	0.0294085	0.185222	0.153182	FJX1/STRA6/ALDH1A3/PRDM1/COL8A1/MFAP2/SDK1/COL8A2/AQP5	9	geneontology_Biological_Process	0.0172745	Up
GO:0002291	GO:0002291	T cell activation via T cell receptor contact with antigen bound to MHC molecule on antigen presenting cell	2/521	10/18866	0.029575	0.185222	0.153182	LGALS3/ICAM1	2	geneontology_Biological_Process	0.00383877	Up
GO:0006971	GO:0006971	hypotonic response	2/521	10/18866	0.029575	0.185222	0.153182	ITGA2/AQP5	2	geneontology_Biological_Process	0.00383877	Up
GO:0009133	GO:0009133	nucleoside diphosphate biosynthetic process	2/521	10/18866	0.029575	0.185222	0.153182	AK1/ENTPD8	2	geneontology_Biological_Process	0.00383877	Up
GO:0032926	GO:0032926	negative regulation of activin receptor signaling pathway	2/521	10/18866	0.029575	0.185222	0.153182	IGSF1/FSTL3	2	geneontology_Biological_Process	0.00383877	Up
GO:0034447	GO:0034447	very-low-density lipoprotein particle clearance	2/521	10/18866	0.029575	0.185222	0.153182	APOE/APOC1	2	geneontology_Biological_Process	0.00383877	Up
GO:0035878	GO:0035878	nail development	2/521	10/18866	0.029575	0.185222	0.153182	ITGB4/RSPO4	2	geneontology_Biological_Process	0.00383877	Up
GO:0060600	GO:0060600	dichotomous subdivision of an epithelial terminal unit	2/521	10/18866	0.029575	0.185222	0.153182	PLXND1/CTSH	2	geneontology_Biological_Process	0.00383877	Up
GO:0090673	GO:0090673	endothelial cell-matrix adhesion	2/521	10/18866	0.029575	0.185222	0.153182	ADAMTS9/CEACAM6	2	geneontology_Biological_Process	0.00383877	Up
GO:0097278	GO:0097278	complement-dependent cytotoxicity	2/521	10/18866	0.029575	0.185222	0.153182	RAB27A/CD55	2	geneontology_Biological_Process	0.00383877	Up
GO:1901748	GO:1901748	leukotriene D4 metabolic process	2/521	10/18866	0.029575	0.185222	0.153182	GGT6/GGT2	2	geneontology_Biological_Process	0.00383877	Up
GO:1901750	GO:1901750	leukotriene D4 biosynthetic process	2/521	10/18866	0.029575	0.185222	0.153182	GGT6/GGT2	2	geneontology_Biological_Process	0.00383877	Up
GO:1902237	GO:1902237	positive regulation of endoplasmic reticulum stress-induced intrinsic apoptotic signaling pathway	2/521	10/18866	0.029575	0.185222	0.153182	RNF183/PMAIP1	2	geneontology_Biological_Process	0.00383877	Up
GO:0051271	GO:0051271	negative regulation of cellular component movement	18/521	400/18866	0.0298186	0.186218	0.154005	ABR/ADORA1/DPP4/TGFB1/SEMA6B/BMERB1/SEMA3F/CX3CL1/TIMP1/ADAMTS9/ARHGDIB/WNT3/ALOX15B/TACSTD2/FRMD5/CYP1B1/ADTRP/APOE	18	geneontology_Biological_Process	0.0345489	Up
GO:0046635	GO:0046635	positive regulation of alpha-beta T cell activation	5/521	63/18866	0.0298607	0.186218	0.154005	RUNX1/EBI3/CD55/ANXA1/PNP	5	geneontology_Biological_Process	0.00959693	Up
GO:1902686	GO:1902686	mitochondrial outer membrane permeabilization involved in programmed cell death	5/521	63/18866	0.0298607	0.186218	0.154005	BBC3/E2F1/BID/SFN/PMAIP1	5	geneontology_Biological_Process	0.00959693	Up
GO:0001909	GO:0001909	leukocyte mediated cytotoxicity	7/521	108/18866	0.0301476	0.186592	0.154315	ULBP2/CTSH/RAB27A/ICAM1/CTSC/CD1A/HLA-G	7	geneontology_Biological_Process	0.0134357	Up
GO:0044774	GO:0044774	mitotic DNA integrity checkpoint	7/521	108/18866	0.0301476	0.186592	0.154315	E2F1/HMGA2/CCND1/SOX4/SFN/CDKN1A/MUC1	7	geneontology_Biological_Process	0.0134357	Up
GO:0032092	GO:0032092	positive regulation of protein binding	6/521	85/18866	0.0301722	0.186592	0.154315	PLXND1/LRRK2/TIAM1/STING1/APOE/RAMP1	6	geneontology_Biological_Process	0.0115163	Up
GO:0043297	GO:0043297	apical junction assembly	6/521	85/18866	0.0301722	0.186592	0.154315	CLDN16/CLDN1/RUNX1/CLDN9/CLDN10/CLDN2	6	geneontology_Biological_Process	0.0115163	Up
GO:1902807	GO:1902807	negative regulation of cell cycle G1/S phase transition	8/521	132/18866	0.0301915	0.186592	0.154315	E2F1/CDKN2B/CCND1/SOX4/CDKN2A/SFN/CDKN1A/MUC1	8	geneontology_Biological_Process	0.0153551	Up
GO:0016339	GO:0016339	calcium-dependent cell-cell adhesion via plasma membrane cell adhesion molecules	4/521	43/18866	0.0303683	0.186592	0.154315	CDH6/FXYD5/CDH2/CDH22	4	geneontology_Biological_Process	0.00767754	Up
GO:0030517	GO:0030517	negative regulation of axon extension	4/521	43/18866	0.0303683	0.186592	0.154315	SEMA6B/SEMA3F/DRAXIN/WNT3	4	geneontology_Biological_Process	0.00767754	Up
GO:0045773	GO:0045773	positive regulation of axon extension	4/521	43/18866	0.0303683	0.186592	0.154315	FN1/TNFRSF12A/CDH4/TRPC5	4	geneontology_Biological_Process	0.00767754	Up
GO:0051017	GO:0051017	actin filament bundle assembly	9/521	157/18866	0.0304677	0.186592	0.154315	FHOD1/NOX4/EPS8/SDC4/CX3CL1/MET/ESPN/TGFBR1/TACSTD2	9	geneontology_Biological_Process	0.0172745	Up
GO:0071695	GO:0071695	anatomical structure maturation	12/521	235/18866	0.0306111	0.186592	0.154315	CDH3/NRCAM/LRRK2/RYR1/REN/CX3CL1/TMEM79/C1QL1/CDKN1A/RUNX2/BNC1/GLDN	12	geneontology_Biological_Process	0.0230326	Up
GO:0003071	GO:0003071	renal system process involved in regulation of systemic arterial blood pressure	3/521	25/18866	0.0306826	0.186592	0.154315	ADORA1/REN/F2R	3	geneontology_Biological_Process	0.00575816	Up
GO:0022410	GO:0022410	circadian sleep/wake cycle process	3/521	25/18866	0.0306826	0.186592	0.154315	ADORA1/CSF2/NMU	3	geneontology_Biological_Process	0.00575816	Up
GO:0032528	GO:0032528	microvillus organization	3/521	25/18866	0.0306826	0.186592	0.154315	FXYD5/ESPN/GLDN	3	geneontology_Biological_Process	0.00575816	Up
GO:0045662	GO:0045662	negative regulation of myoblast differentiation	3/521	25/18866	0.0306826	0.186592	0.154315	TGFB1/CCL17/CXCL14	3	geneontology_Biological_Process	0.00575816	Up
GO:0060259	GO:0060259	regulation of feeding behavior	3/521	25/18866	0.0306826	0.186592	0.154315	UCN/NMU/RETN	3	geneontology_Biological_Process	0.00575816	Up
GO:0097205	GO:0097205	renal filtration	3/521	25/18866	0.0306826	0.186592	0.154315	ADORA1/ITGA3/F2R	3	geneontology_Biological_Process	0.00575816	Up
GO:1905809	GO:1905809	negative regulation of synapse organization	3/521	25/18866	0.0306826	0.186592	0.154315	NGEF/SLIT1/CBLN1	3	geneontology_Biological_Process	0.00575816	Up
GO:2001026	GO:2001026	regulation of endothelial cell chemotaxis	3/521	25/18866	0.0306826	0.186592	0.154315	MET/FGF1/TMSB4X	3	geneontology_Biological_Process	0.00575816	Up
GO:0034765	GO:0034765	regulation of ion transmembrane transport	21/521	489/18866	0.0312765	0.189942	0.157085	SCN1B/KCNQ3/HCN4/FXYD5/KCNJ2/DLG4/CX3CL1/TESC/DYSF/CATSPER1/RASGRF1/STAC/KCNS3/CACNB1/F2R/CACNG4/APLNR/CTSS/TMSB4X/TREM2/SHISA6	21	geneontology_Biological_Process	0.0403071	Up
GO:0042770	GO:0042770	signal transduction in response to DNA damage	8/521	133/18866	0.0313814	0.190056	0.157179	E2F1/BID/SOX4/SFN/CDKN1A/CD44/PMAIP1/MUC1	8	geneontology_Biological_Process	0.0153551	Up
GO:0090101	GO:0090101	negative regulation of transmembrane receptor protein serine/threonine kinase signaling pathway	8/521	133/18866	0.0313814	0.190056	0.157179	TGFB1/TMPRSS6/IGSF1/IL17RD/TGFBR1/VASN/FSTL3/CD109	8	geneontology_Biological_Process	0.0153551	Up
GO:0007265	GO:0007265	Ras protein signal transduction	16/521	346/18866	0.0315732	0.190955	0.157923	TIAM1/EPS8/MET/PSD3/ITGA3/ARHGDIB/CDC42EP1/GPR4/RASGRF1/CDKN2A/CDKN1A/F2R/CDC42EP5/CDC42EP3/RHOV/APOE	16	geneontology_Biological_Process	0.0307102	Up
GO:1900449	GO:1900449	regulation of glutamate receptor signaling pathway	5/521	64/18866	0.0316837	0.190991	0.157953	DLG4/CX3CL1/RASGRF1/CACNG4/SHISA6	5	geneontology_Biological_Process	0.00959693	Up
GO:0014910	GO:0014910	regulation of smooth muscle cell migration	6/521	86/18866	0.0317092	0.190991	0.157953	S100A11/NOX4/ITGA2/MDK/PLAU/POSTN	6	geneontology_Biological_Process	0.0115163	Up
GO:0070664	GO:0070664	negative regulation of leukocyte proliferation	6/521	86/18866	0.0317092	0.190991	0.157953	SDC4/PDE5A/TNFRSF21/PELI1/VTCN1/HLA-G	6	geneontology_Biological_Process	0.0115163	Up
GO:0030100	GO:0030100	regulation of endocytosis	11/521	210/18866	0.031974	0.192324	0.159055	LRRK2/DLG4/ITGA2/CD151/LGALS3/CLIP3/APLN/TREM2/APOE/APOC1/CD177	11	geneontology_Biological_Process	0.0211132	Up
GO:0001936	GO:0001936	regulation of endothelial cell proliferation	10/521	184/18866	0.0320595	0.192576	0.159263	LRG1/DYSF/MDK/NRP2/TGFBR1/APLN/ECM1/APLNR/ALOX5/APOE	10	geneontology_Biological_Process	0.0191939	Up
GO:0032965	GO:0032965	regulation of collagen biosynthetic process	4/521	44/18866	0.0327007	0.194834	0.161131	TGFB1/UCN/ITGA2/F2R	4	geneontology_Biological_Process	0.00767754	Up
GO:0085029	GO:0085029	extracellular matrix assembly	4/521	44/18866	0.0327007	0.194834	0.161131	TGFB1/LAMB3/QSOX1/PXDN	4	geneontology_Biological_Process	0.00767754	Up
GO:0097028	GO:0097028	dendritic cell differentiation	4/521	44/18866	0.0327007	0.194834	0.161131	CSF2/DCSTAMP/TREM2/HLA-G	4	geneontology_Biological_Process	0.00767754	Up
GO:0097178	GO:0097178	ruffle assembly	4/521	44/18866	0.0327007	0.194834	0.161131	EPS8/ICAM1/TACSTD2/CSPG4	4	geneontology_Biological_Process	0.00767754	Up
GO:1902667	GO:1902667	regulation of axon guidance	4/521	44/18866	0.0327007	0.194834	0.161131	SEMA6B/SEMA3F/WNT3/PLXNA4	4	geneontology_Biological_Process	0.00767754	Up
GO:1905521	GO:1905521	regulation of macrophage migration	4/521	44/18866	0.0327007	0.194834	0.161131	CX3CL1/MDK/CXCL17/TREM2	4	geneontology_Biological_Process	0.00767754	Up
GO:0006641	GO:0006641	triglyceride metabolic process	7/521	110/18866	0.0328563	0.195234	0.161462	LIPH/THRSP/SREBF1/LPL/PNPLA5/APOE/APOC1	7	geneontology_Biological_Process	0.0134357	Up
GO:0090100	GO:0090100	positive regulation of transmembrane receptor protein serine/threonine kinase signaling pathway	7/521	110/18866	0.0328563	0.195234	0.161462	GDF15/CDKN2B/TGFB1/CITED1/LRG1/TGFBR1/INHBB	7	geneontology_Biological_Process	0.0134357	Up
GO:0032412	GO:0032412	regulation of ion transmembrane transporter activity	13/521	265/18866	0.0332131	0.196576	0.162572	SCN1B/FXYD5/DLG4/TESC/DYSF/RASGRF1/STAC/CACNB1/CACNG4/CTSS/TMSB4X/TREM2/SHISA6	13	geneontology_Biological_Process	0.024952	Up
GO:0070085	GO:0070085	glycosylation	13/521	265/18866	0.0332131	0.196576	0.162572	TUSC3/GALNT7/B3GNT7/B3GNT8/B3GNT3/ST8SIA4/B3GAT1/MUC21/ST3GAL5/MGAT3/ST6GALNAC5/RAMP1/MUC1	13	geneontology_Biological_Process	0.024952	Up
GO:0002683	GO:0002683	negative regulation of immune system process	20/521	463/18866	0.033216	0.196576	0.162572	ABR/ADORA1/DPP4/TGFB1/RUNX1/SDC4/CX3CL1/TYRO3/NR1D1/MDK/LGALS3/PDE5A/TNFRSF21/CD55/FSTL3/ADTRP/ANXA1/PELI1/VTCN1/HLA-G	20	geneontology_Biological_Process	0.0383877	Up
GO:0035773	GO:0035773	insulin secretion involved in cellular response to glucose stimulus	5/521	65/18866	0.0335748	0.196824	0.162777	TIAM1/BAIAP3/NR1D1/C1QTNF12/ADCY8	5	geneontology_Biological_Process	0.00959693	Up
GO:0035794	GO:0035794	positive regulation of mitochondrial membrane permeability	5/521	65/18866	0.0335748	0.196824	0.162777	BBC3/E2F1/BID/SFN/PMAIP1	5	geneontology_Biological_Process	0.00959693	Up
GO:0051205	GO:0051205	protein insertion into membrane	5/521	65/18866	0.0335748	0.196824	0.162777	BBC3/E2F1/BID/SFN/PMAIP1	5	geneontology_Biological_Process	0.00959693	Up
GO:0030278	GO:0030278	regulation of ossification	11/521	212/18866	0.0339093	0.196824	0.162777	LRP4/TGFB1/CITED1/PDLIM7/MDK/KL/COMP/DHRS3/ECM1/RUNX2/ALOX5	11	geneontology_Biological_Process	0.0211132	Up
GO:0000188	GO:0000188	inactivation of MAPK activity	3/521	26/18866	0.0339928	0.196824	0.162777	DUSP4/DUSP6/DUSP5	3	geneontology_Biological_Process	0.00575816	Up
GO:0006688	GO:0006688	glycosphingolipid biosynthetic process	3/521	26/18866	0.0339928	0.196824	0.162777	ST8SIA4/ST3GAL5/ST6GALNAC5	3	geneontology_Biological_Process	0.00575816	Up
GO:0021952	GO:0021952	central nervous system projection neuron axonogenesis	3/521	26/18866	0.0339928	0.196824	0.162777	SCN1B/EPHB3/PLXNA4	3	geneontology_Biological_Process	0.00575816	Up
GO:0030318	GO:0030318	melanocyte differentiation	3/521	26/18866	0.0339928	0.196824	0.162777	CITED1/ADAMTS9/RAB27A	3	geneontology_Biological_Process	0.00575816	Up
GO:0042730	GO:0042730	fibrinolysis	3/521	26/18866	0.0339928	0.196824	0.162777	PROS1/PLAU/PLAUR	3	geneontology_Biological_Process	0.00575816	Up
GO:0043567	GO:0043567	regulation of insulin-like growth factor receptor signaling pathway	3/521	26/18866	0.0339928	0.196824	0.162777	CDH3/IGFBP2/IGFBP6	3	geneontology_Biological_Process	0.00575816	Up
GO:0048843	GO:0048843	negative regulation of axon extension involved in axon guidance	3/521	26/18866	0.0339928	0.196824	0.162777	SEMA6B/SEMA3F/WNT3	3	geneontology_Biological_Process	0.00575816	Up
GO:0055083	GO:0055083	monovalent inorganic anion homeostasis	3/521	26/18866	0.0339928	0.196824	0.162777	XPR1/SLC34A2/CA12	3	geneontology_Biological_Process	0.00575816	Up
GO:0060706	GO:0060706	cell differentiation involved in embryonic placenta development	3/521	26/18866	0.0339928	0.196824	0.162777	MDFI/PRDM1/KRT19	3	geneontology_Biological_Process	0.00575816	Up
GO:0090023	GO:0090023	positive regulation of neutrophil chemotaxis	3/521	26/18866	0.0339928	0.196824	0.162777	DYSF/MDK/DAPK2	3	geneontology_Biological_Process	0.00575816	Up
GO:0097066	GO:0097066	response to thyroid hormone	3/521	26/18866	0.0339928	0.196824	0.162777	CTSH/CTSS/HPN	3	geneontology_Biological_Process	0.00575816	Up
GO:1901071	GO:1901071	glucosamine-containing compound metabolic process	3/521	26/18866	0.0339928	0.196824	0.162777	CHST2/MGAT3/CHI3L1	3	geneontology_Biological_Process	0.00575816	Up
GO:2000116	GO:2000116	regulation of cysteine-type endopeptidase activity	12/521	239/18866	0.0341921	0.196824	0.162777	BBC3/BID/CTSH/NOD1/SFN/PERP/CD44/TNFSF15/F2R/BIRC7/PLAUR/PMAIP1	12	geneontology_Biological_Process	0.0230326	Up
GO:0032652	GO:0032652	regulation of interleukin-1 production	7/521	111/18866	0.0342696	0.196824	0.162777	CX3CL1/LPL/NOD1/F2R/INAVA/TREM2/ANXA1	7	geneontology_Biological_Process	0.0134357	Up
GO:0016051	GO:0016051	carbohydrate biosynthetic process	11/521	213/18866	0.0349074	0.196824	0.162777	TGFB1/B3GNT7/B3GNT8/HRH1/B3GNT3/NR1D1/ISYNA1/PC/C1QTNF12/ST6GALNAC5/ERFE	11	geneontology_Biological_Process	0.0211132	Up
GO:0050818	GO:0050818	regulation of coagulation	6/521	88/18866	0.034934	0.196824	0.162777	PROS1/PLAU/F2R/PLAUR/ADTRP/APOE	6	geneontology_Biological_Process	0.0115163	Up
GO:0070098	GO:0070098	chemokine-mediated signaling pathway	6/521	88/18866	0.034934	0.196824	0.162777	CX3CL1/TREM2/CCL13/CCL20/CCL17/CCL18	6	geneontology_Biological_Process	0.0115163	Up
GO:0061572	GO:0061572	actin filament bundle organization	9/521	161/18866	0.0349704	0.196824	0.162777	FHOD1/NOX4/EPS8/SDC4/CX3CL1/MET/ESPN/TGFBR1/TACSTD2	9	geneontology_Biological_Process	0.0172745	Up
GO:0003197	GO:0003197	endocardial cushion development	4/521	45/18866	0.035135	0.196824	0.162777	HEY2/TGFBR1/ERBB3/TMEM100	4	geneontology_Biological_Process	0.00767754	Up
GO:0032924	GO:0032924	activin receptor signaling pathway	4/521	45/18866	0.035135	0.196824	0.162777	IGSF1/TGFBR1/FSTL3/INHBB	4	geneontology_Biological_Process	0.00767754	Up
GO:0042771	GO:0042771	intrinsic apoptotic signaling pathway in response to DNA damage by p53 class mediator	4/521	45/18866	0.035135	0.196824	0.162777	PHLDA3/CDKN1A/CD44/MUC1	4	geneontology_Biological_Process	0.00767754	Up
GO:0045616	GO:0045616	regulation of keratinocyte differentiation	4/521	45/18866	0.035135	0.196824	0.162777	ETV4/RUNX1/ALOX15B/CD109	4	geneontology_Biological_Process	0.00767754	Up
GO:0098815	GO:0098815	modulation of excitatory postsynaptic potential	4/521	45/18866	0.035135	0.196824	0.162777	LRRK2/DLG4/CELF4/CBLN1	4	geneontology_Biological_Process	0.00767754	Up
GO:0050671	GO:0050671	positive regulation of lymphocyte proliferation	8/521	136/18866	0.0351429	0.196824	0.162777	CDKN1A/IGFBP2/EBI3/CD55/ANXA1/PELI1/PNP/VTCN1	8	geneontology_Biological_Process	0.0153551	Up
GO:0008217	GO:0008217	regulation of blood pressure	10/521	187/18866	0.0352292	0.196824	0.162777	ADORA1/ADRA1B/ECE1/REN/UCN/ADM/NMU/F2R/APLN/POSTN	10	geneontology_Biological_Process	0.0191939	Up
GO:0003093	GO:0003093	regulation of glomerular filtration	2/521	11/18866	0.0354966	0.196824	0.162777	ADORA1/F2R	2	geneontology_Biological_Process	0.00383877	Up
GO:0007614	GO:0007614	short-term memory	2/521	11/18866	0.0354966	0.196824	0.162777	MDK/BRINP1	2	geneontology_Biological_Process	0.00383877	Up
GO:0009950	GO:0009950	dorsal/ventral axis specification	2/521	11/18866	0.0354966	0.196824	0.162777	MDFI/WNT3	2	geneontology_Biological_Process	0.00383877	Up
GO:0031652	GO:0031652	positive regulation of heat generation	2/521	11/18866	0.0354966	0.196824	0.162777	NMU/APLN	2	geneontology_Biological_Process	0.00383877	Up
GO:0032754	GO:0032754	positive regulation of interleukin-5 production	2/521	11/18866	0.0354966	0.196824	0.162777	IL1RAP/CRLF2	2	geneontology_Biological_Process	0.00383877	Up
GO:0033197	GO:0033197	response to vitamin E	2/521	11/18866	0.0354966	0.196824	0.162777	CCND1/COL1A1	2	geneontology_Biological_Process	0.00383877	Up
GO:0034372	GO:0034372	very-low-density lipoprotein particle remodeling	2/521	11/18866	0.0354966	0.196824	0.162777	LPL/APOE	2	geneontology_Biological_Process	0.00383877	Up
GO:0042447	GO:0042447	hormone catabolic process	2/521	11/18866	0.0354966	0.196824	0.162777	ECE1/SPP1	2	geneontology_Biological_Process	0.00383877	Up
GO:0048672	GO:0048672	positive regulation of collateral sprouting	2/521	11/18866	0.0354966	0.196824	0.162777	WNT3/CRABP2	2	geneontology_Biological_Process	0.00383877	Up
GO:0048875	GO:0048875	chemical homeostasis within a tissue	2/521	11/18866	0.0354966	0.196824	0.162777	CTSH/NAPSA	2	geneontology_Biological_Process	0.00383877	Up
GO:0060159	GO:0060159	regulation of dopamine receptor signaling pathway	2/521	11/18866	0.0354966	0.196824	0.162777	LRRK2/PALM	2	geneontology_Biological_Process	0.00383877	Up
GO:0060174	GO:0060174	limb bud formation	2/521	11/18866	0.0354966	0.196824	0.162777	SOX4/WNT3	2	geneontology_Biological_Process	0.00383877	Up
GO:0060281	GO:0060281	regulation of oocyte development	2/521	11/18866	0.0354966	0.196824	0.162777	PDE5A/BNC1	2	geneontology_Biological_Process	0.00383877	Up
GO:0060837	GO:0060837	blood vessel endothelial cell differentiation	2/521	11/18866	0.0354966	0.196824	0.162777	HEY2/TMEM100	2	geneontology_Biological_Process	0.00383877	Up
GO:0070106	GO:0070106	interleukin-27-mediated signaling pathway	2/521	11/18866	0.0354966	0.196824	0.162777	EBI3/CRLF1	2	geneontology_Biological_Process	0.00383877	Up
GO:0070254	GO:0070254	mucus secretion	2/521	11/18866	0.0354966	0.196824	0.162777	ADORA1/AGR2	2	geneontology_Biological_Process	0.00383877	Up
GO:0070673	GO:0070673	response to interleukin-18	2/521	11/18866	0.0354966	0.196824	0.162777	CLDN1/ALOX5	2	geneontology_Biological_Process	0.00383877	Up
GO:0090205	GO:0090205	positive regulation of cholesterol metabolic process	2/521	11/18866	0.0354966	0.196824	0.162777	SREBF1/FGF1	2	geneontology_Biological_Process	0.00383877	Up
GO:0090557	GO:0090557	establishment of endothelial intestinal barrier	2/521	11/18866	0.0354966	0.196824	0.162777	CLDN1/ICAM1	2	geneontology_Biological_Process	0.00383877	Up
GO:0098883	GO:0098883	synapse pruning	2/521	11/18866	0.0354966	0.196824	0.162777	CX3CL1/TREM2	2	geneontology_Biological_Process	0.00383877	Up
GO:1905879	GO:1905879	regulation of oogenesis	2/521	11/18866	0.0354966	0.196824	0.162777	PDE5A/BNC1	2	geneontology_Biological_Process	0.00383877	Up
GO:1902108	GO:1902108	regulation of mitochondrial membrane permeability involved in apoptotic process	5/521	66/18866	0.0355346	0.196824	0.162777	BBC3/E2F1/BID/SFN/PMAIP1	5	geneontology_Biological_Process	0.00959693	Up
GO:0051348	GO:0051348	negative regulation of transferase activity	14/521	296/18866	0.036214	0.200336	0.165681	SRCIN1/CDKN2B/DUSP4/CAMK2N2/DUSP6/MVP/CAMK2N1/PPP1R1B/TESC/CDKN2A/SFN/CDKN1A/DUSP5/APOE	14	geneontology_Biological_Process	0.0268714	Up
GO:0032946	GO:0032946	positive regulation of mononuclear cell proliferation	8/521	137/18866	0.0364616	0.201453	0.166604	CDKN1A/IGFBP2/EBI3/CD55/ANXA1/PELI1/PNP/VTCN1	8	geneontology_Biological_Process	0.0153551	Up
GO:0043281	GO:0043281	regulation of cysteine-type endopeptidase activity involved in apoptotic process	11/521	215/18866	0.0369654	0.20398	0.168695	BBC3/BID/CTSH/NOD1/SFN/CD44/TNFSF15/F2R/BIRC7/PLAUR/PMAIP1	11	geneontology_Biological_Process	0.0211132	Up
GO:1903510	GO:1903510	mucopolysaccharide metabolic process	7/521	113/18866	0.037216	0.204719	0.169306	TGFB1/B3GNT7/B3GNT3/CHST2/CD44/CSPG4/SPOCK2	7	geneontology_Biological_Process	0.0134357	Up
GO:0006909	GO:0006909	phagocytosis	17/521	382/18866	0.0372291	0.204719	0.169306	ABR/ADORA1/ICAM5/MFGE8/MET/TYRO3/DYSF/ITGA2/RAB27A/FCN3/TGM2/MST1R/TREM2/ANXA1/MYO1G/MARCO/SFTPA1	17	geneontology_Biological_Process	0.0326296	Up
GO:0010876	GO:0010876	lipid localization	19/521	440/18866	0.0373632	0.204719	0.169306	NPC2/THRSP/PRELID3A/ABCC3/REN/STRA6/DYSF/LPL/PLA2G12B/KCNN4/ATP11A/SLC27A6/ANXA1/RETN/APOE/ERFE/APOC1/SFTPA1/SPP1	19	geneontology_Biological_Process	0.0364683	Up
GO:0002021	GO:0002021	response to dietary excess	3/521	27/18866	0.0374802	0.204719	0.169306	GDF15/PCSK1N/APOE	3	geneontology_Biological_Process	0.00575816	Up
GO:0006829	GO:0006829	zinc ion transport	3/521	27/18866	0.0374802	0.204719	0.169306	TMEM163/SLC30A2/SLC30A3	3	geneontology_Biological_Process	0.00575816	Up
GO:0007026	GO:0007026	negative regulation of microtubule depolymerization	3/521	27/18866	0.0374802	0.204719	0.169306	BMERB1/TRIM54/STMN2	3	geneontology_Biological_Process	0.00575816	Up
GO:0010996	GO:0010996	response to auditory stimulus	3/521	27/18866	0.0374802	0.204719	0.169306	STRA6/UCN/MDK	3	geneontology_Biological_Process	0.00575816	Up
GO:0048668	GO:0048668	collateral sprouting	3/521	27/18866	0.0374802	0.204719	0.169306	WNT3/CRABP2/SPP1	3	geneontology_Biological_Process	0.00575816	Up
GO:0045123	GO:0045123	cellular extravasation	5/521	67/18866	0.0375636	0.204719	0.169306	ABR/CX3CL1/MDK/ICAM1/CD177	5	geneontology_Biological_Process	0.00959693	Up
GO:1905710	GO:1905710	positive regulation of membrane permeability	5/521	67/18866	0.0375636	0.204719	0.169306	BBC3/E2F1/BID/SFN/PMAIP1	5	geneontology_Biological_Process	0.00959693	Up
GO:0035987	GO:0035987	endodermal cell differentiation	4/521	46/18866	0.0376715	0.205054	0.169583	HMGA2/FN1/LAMB3/COL8A1	4	geneontology_Biological_Process	0.00767754	Up
GO:0070542	GO:0070542	response to fatty acid	6/521	90/18866	0.0383629	0.20856	0.172483	E2F1/CLDN1/SREBF1/LPL/SCD/TNC	6	geneontology_Biological_Process	0.0115163	Up
GO:0030308	GO:0030308	negative regulation of cell growth	10/521	190/18866	0.038611	0.20965	0.173384	CDA/TGFB1/SEMA6B/SEMA3F/DRAXIN/DCSTAMP/WNT3/CDKN2A/CDKN1A/SPP1	10	geneontology_Biological_Process	0.0191939	Up
GO:0042391	GO:0042391	regulation of membrane potential	19/521	443/18866	0.0395664	0.213959	0.176948	SCN1B/ADORA1/GABRB2/BID/NRCAM/KCNQ3/LRRK2/GABRD/HCN4/KCNJ2/DLG4/CELF4/GLRB/KCNN4/TRPC5/CACNG4/CBLN1/TREM2/PMAIP1	19	geneontology_Biological_Process	0.0364683	Up
GO:0050766	GO:0050766	positive regulation of phagocytosis	5/521	68/18866	0.0396623	0.213959	0.176948	ABR/MFGE8/ITGA2/RAB27A/TREM2	5	geneontology_Biological_Process	0.00959693	Up
GO:0001843	GO:0001843	neural tube closure	6/521	91/18866	0.040155	0.213959	0.176948	GRHL3/TGFB1/SPINT1/MTHFD1L/SDC4/ADM	6	geneontology_Biological_Process	0.0115163	Up
GO:0015914	GO:0015914	phospholipid transport	6/521	91/18866	0.040155	0.213959	0.176948	NPC2/PRELID3A/KCNN4/ATP11A/APOE/APOC1	6	geneontology_Biological_Process	0.0115163	Up
GO:0034103	GO:0034103	regulation of tissue remodeling	6/521	91/18866	0.040155	0.213959	0.176948	ABR/TGFB1/MDK/DCSTAMP/SIGLEC15/SPP1	6	geneontology_Biological_Process	0.0115163	Up
GO:0046849	GO:0046849	bone remodeling	6/521	91/18866	0.040155	0.213959	0.176948	TGFB1/NOX4/MDK/DCSTAMP/SIGLEC15/SPP1	6	geneontology_Biological_Process	0.0115163	Up
GO:0051492	GO:0051492	regulation of stress fiber assembly	6/521	91/18866	0.040155	0.213959	0.176948	FHOD1/NOX4/SDC4/MET/TGFBR1/TACSTD2	6	geneontology_Biological_Process	0.0115163	Up
GO:0042572	GO:0042572	retinol metabolic process	4/521	47/18866	0.0403105	0.213959	0.176948	ALDH1A3/RDH5/DHRS3/CYP1B1	4	geneontology_Biological_Process	0.00767754	Up
GO:0045933	GO:0045933	positive regulation of muscle contraction	4/521	47/18866	0.0403105	0.213959	0.176948	UCN/ITGA2/NMU/F2R	4	geneontology_Biological_Process	0.00767754	Up
GO:0001933	GO:0001933	negative regulation of protein phosphorylation	19/521	444/18866	0.0403214	0.213959	0.176948	SRCIN1/CDKN2B/DUSP4/TGFB1/LRRK2/CAMK2N2/DUSP6/MVP/CAMK2N1/PPP1R1B/TESC/CDKN2A/SFN/CDKN1A/DUSP5/LMO3/CD109/MLXIPL/APOE	19	geneontology_Biological_Process	0.0364683	Up
GO:0048640	GO:0048640	negative regulation of developmental growth	7/521	115/18866	0.0403244	0.213959	0.176948	GDF15/SEMA6B/SEMA3F/DRAXIN/WNT3/CDKN1A/SPP1	7	geneontology_Biological_Process	0.0134357	Up
GO:0010575	GO:0010575	positive regulation of vascular endothelial growth factor production	3/521	28/18866	0.0411431	0.213959	0.176948	TGFB1/CXCL17/CYP1B1	3	geneontology_Biological_Process	0.00575816	Up
GO:0018146	GO:0018146	keratan sulfate biosynthetic process	3/521	28/18866	0.0411431	0.213959	0.176948	B3GNT7/B3GNT3/CHST2	3	geneontology_Biological_Process	0.00575816	Up
GO:0045606	GO:0045606	positive regulation of epidermal cell differentiation	3/521	28/18866	0.0411431	0.213959	0.176948	ETV4/SFN/ALOX15B	3	geneontology_Biological_Process	0.00575816	Up
GO:0060143	GO:0060143	positive regulation of syncytium formation by plasma membrane fusion	3/521	28/18866	0.0411431	0.213959	0.176948	GDF15/DCSTAMP/TREM2	3	geneontology_Biological_Process	0.00575816	Up
GO:1902668	GO:1902668	negative regulation of axon guidance	3/521	28/18866	0.0411431	0.213959	0.176948	SEMA6B/SEMA3F/WNT3	3	geneontology_Biological_Process	0.00575816	Up
GO:1902932	GO:1902932	positive regulation of alcohol biosynthetic process	3/521	28/18866	0.0411431	0.213959	0.176948	HRH1/SREBF1/FGF1	3	geneontology_Biological_Process	0.00575816	Up
GO:0072330	GO:0072330	monocarboxylic acid biosynthetic process	12/521	246/18866	0.0411605	0.213959	0.176948	LIPH/LPL/NR1D1/ALDH1A3/OLAH/ALOX15B/CSPG4/ALOX5/ANXA1/MLXIPL/SCD/APOC1	12	geneontology_Biological_Process	0.0230326	Up
GO:2001242	GO:2001242	regulation of intrinsic apoptotic signaling pathway	9/521	166/18866	0.0412165	0.213959	0.176948	BBC3/BID/LRRK2/CD44/RNF183/PLAUR/DAPK2/PMAIP1/MUC1	9	geneontology_Biological_Process	0.0172745	Up
GO:0006216	GO:0006216	cytidine catabolic process	2/521	12/18866	0.041831	0.213959	0.176948	CDA/APOBEC3H	2	geneontology_Biological_Process	0.00383877	Up
GO:0009972	GO:0009972	cytidine deamination	2/521	12/18866	0.041831	0.213959	0.176948	CDA/APOBEC3H	2	geneontology_Biological_Process	0.00383877	Up
GO:0021559	GO:0021559	trigeminal nerve development	2/521	12/18866	0.041831	0.213959	0.176948	SEMA3F/PLXNA4	2	geneontology_Biological_Process	0.00383877	Up
GO:0030157	GO:0030157	pancreatic juice secretion	2/521	12/18866	0.041831	0.213959	0.176948	UCN/AQP5	2	geneontology_Biological_Process	0.00383877	Up
GO:0031340	GO:0031340	positive regulation of vesicle fusion	2/521	12/18866	0.041831	0.213959	0.176948	ANXA1/SYT1	2	geneontology_Biological_Process	0.00383877	Up
GO:0033629	GO:0033629	negative regulation of cell adhesion mediated by integrin	2/521	12/18866	0.041831	0.213959	0.176948	CYP1B1/MUC1	2	geneontology_Biological_Process	0.00383877	Up
GO:0033700	GO:0033700	phospholipid efflux	2/521	12/18866	0.041831	0.213959	0.176948	APOE/APOC1	2	geneontology_Biological_Process	0.00383877	Up
GO:0036005	GO:0036005	response to macrophage colony-stimulating factor	2/521	12/18866	0.041831	0.213959	0.176948	DCSTAMP/MST1R	2	geneontology_Biological_Process	0.00383877	Up
GO:0036006	GO:0036006	cellular response to macrophage colony-stimulating factor stimulus	2/521	12/18866	0.041831	0.213959	0.176948	DCSTAMP/MST1R	2	geneontology_Biological_Process	0.00383877	Up
GO:0042118	GO:0042118	endothelial cell activation	2/521	12/18866	0.041831	0.213959	0.176948	TGFBR1/TCIM	2	geneontology_Biological_Process	0.00383877	Up
GO:0042492	GO:0042492	gamma-delta T cell differentiation	2/521	12/18866	0.041831	0.213959	0.176948	JAG2/SOX4	2	geneontology_Biological_Process	0.00383877	Up
GO:0044650	GO:0044650	adhesion of symbiont to host cell	2/521	12/18866	0.041831	0.213959	0.176948	ICAM1/INHBB	2	geneontology_Biological_Process	0.00383877	Up
GO:0045161	GO:0045161	neuronal ion channel clustering	2/521	12/18866	0.041831	0.213959	0.176948	NRCAM/GLDN	2	geneontology_Biological_Process	0.00383877	Up
GO:0046087	GO:0046087	cytidine metabolic process	2/521	12/18866	0.041831	0.213959	0.176948	CDA/APOBEC3H	2	geneontology_Biological_Process	0.00383877	Up
GO:0046541	GO:0046541	saliva secretion	2/521	12/18866	0.041831	0.213959	0.176948	KCNN4/AQP5	2	geneontology_Biological_Process	0.00383877	Up
GO:0048148	GO:0048148	behavioral response to cocaine	2/521	12/18866	0.041831	0.213959	0.176948	PPP1R1B/SDK1	2	geneontology_Biological_Process	0.00383877	Up
GO:0055062	GO:0055062	phosphate ion homeostasis	2/521	12/18866	0.041831	0.213959	0.176948	XPR1/SLC34A2	2	geneontology_Biological_Process	0.00383877	Up
GO:0060081	GO:0060081	membrane hyperpolarization	2/521	12/18866	0.041831	0.213959	0.176948	KCNQ3/TRPC5	2	geneontology_Biological_Process	0.00383877	Up
GO:0060453	GO:0060453	regulation of gastric acid secretion	2/521	12/18866	0.041831	0.213959	0.176948	UCN/NMU	2	geneontology_Biological_Process	0.00383877	Up
GO:0060670	GO:0060670	branching involved in labyrinthine layer morphogenesis	2/521	12/18866	0.041831	0.213959	0.176948	SPINT1/ADM	2	geneontology_Biological_Process	0.00383877	Up
GO:0060900	GO:0060900	embryonic camera-type eye formation	2/521	12/18866	0.041831	0.213959	0.176948	STRA6/ALDH1A3	2	geneontology_Biological_Process	0.00383877	Up
GO:0061517	GO:0061517	macrophage proliferation	2/521	12/18866	0.041831	0.213959	0.176948	CX3CL1/TREM2	2	geneontology_Biological_Process	0.00383877	Up
GO:0070493	GO:0070493	thrombin-activated receptor signaling pathway	2/521	12/18866	0.041831	0.213959	0.176948	MET/F2R	2	geneontology_Biological_Process	0.00383877	Up
GO:0071107	GO:0071107	response to parathyroid hormone	2/521	12/18866	0.041831	0.213959	0.176948	CITED1/ITGA2	2	geneontology_Biological_Process	0.00383877	Up
GO:0071340	GO:0071340	skeletal muscle acetylcholine-gated channel clustering	2/521	12/18866	0.041831	0.213959	0.176948	LRP4/ETV5	2	geneontology_Biological_Process	0.00383877	Up
GO:0072505	GO:0072505	divalent inorganic anion homeostasis	2/521	12/18866	0.041831	0.213959	0.176948	XPR1/SLC34A2	2	geneontology_Biological_Process	0.00383877	Up
GO:0072506	GO:0072506	trivalent inorganic anion homeostasis	2/521	12/18866	0.041831	0.213959	0.176948	XPR1/SLC34A2	2	geneontology_Biological_Process	0.00383877	Up
GO:0097104	GO:0097104	postsynaptic membrane assembly	2/521	12/18866	0.041831	0.213959	0.176948	LRP4/CDH2	2	geneontology_Biological_Process	0.00383877	Up
GO:0099151	GO:0099151	regulation of postsynaptic density assembly	2/521	12/18866	0.041831	0.213959	0.176948	IL1RAP/CBLN1	2	geneontology_Biological_Process	0.00383877	Up
GO:1903909	GO:1903909	regulation of receptor clustering	2/521	12/18866	0.041831	0.213959	0.176948	LRP4/SHISA6	2	geneontology_Biological_Process	0.00383877	Up
GO:2001214	GO:2001214	positive regulation of vasculogenesis	2/521	12/18866	0.041831	0.213959	0.176948	ADM/TMEM100	2	geneontology_Biological_Process	0.00383877	Up
GO:0045582	GO:0045582	positive regulation of T cell differentiation	6/521	92/18866	0.0419992	0.214322	0.177248	RUNX1/MDK/SOX4/ANXA1/PNP/HLA-G	6	geneontology_Biological_Process	0.0115163	Up
GO:0060606	GO:0060606	tube closure	6/521	92/18866	0.0419992	0.214322	0.177248	GRHL3/TGFB1/SPINT1/MTHFD1L/SDC4/ADM	6	geneontology_Biological_Process	0.0115163	Up
GO:0001889	GO:0001889	liver development	8/521	141/18866	0.0420686	0.214428	0.177336	CLDN1/CCND1/MET/ITGA2/MDK/FGF1/ANXA1/HPN	8	geneontology_Biological_Process	0.0153551	Up
GO:0071248	GO:0071248	cellular response to metal ion	10/521	193/18866	0.0422104	0.214902	0.177728	LRRK2/RYR1/CLDN1/DLG4/SYT12/ADCY8/FSTL3/CPNE4/SYT1/AOC1	10	geneontology_Biological_Process	0.0191939	Up
GO:0010862	GO:0010862	positive regulation of pathway-restricted SMAD protein phosphorylation	4/521	48/18866	0.0430519	0.218179	0.180438	GDF15/TGFB1/TGFBR1/INHBB	4	geneontology_Biological_Process	0.00767754	Up
GO:0042220	GO:0042220	response to cocaine	4/521	48/18866	0.0430519	0.218179	0.180438	TIAM1/PPP1R1B/CACNG4/SDK1	4	geneontology_Biological_Process	0.00767754	Up
GO:0048701	GO:0048701	embryonic cranial skeleton morphogenesis	4/521	48/18866	0.0430519	0.218179	0.180438	MTHFD1L/TGFBR1/MMP16/RUNX2	4	geneontology_Biological_Process	0.00767754	Up
GO:0061001	GO:0061001	regulation of dendritic spine morphogenesis	4/521	48/18866	0.0430519	0.218179	0.180438	SRCIN1/NGEF/LRRK2/TIAM1	4	geneontology_Biological_Process	0.00767754	Up
GO:0022898	GO:0022898	regulation of transmembrane transporter activity	13/521	276/18866	0.0436696	0.221056	0.182817	SCN1B/FXYD5/DLG4/TESC/DYSF/RASGRF1/STAC/CACNB1/CACNG4/CTSS/TMSB4X/TREM2/SHISA6	13	geneontology_Biological_Process	0.024952	Up
GO:0014909	GO:0014909	smooth muscle cell migration	6/521	93/18866	0.0438959	0.221273	0.182996	S100A11/NOX4/ITGA2/MDK/PLAU/POSTN	6	geneontology_Biological_Process	0.0115163	Up
GO:0051702	GO:0051702	interaction with symbiont	6/521	93/18866	0.0438959	0.221273	0.182996	HMGA2/FN1/PC/POU2F3/APOE/HPN	6	geneontology_Biological_Process	0.0115163	Up
GO:0071772	GO:0071772	response to BMP	9/521	168/18866	0.0439132	0.221273	0.182996	GDF15/TGFB1/SPINT1/TMPRSS6/ITGA3/COMP/RUNX2/FSTL3/TMEM100	9	geneontology_Biological_Process	0.0172745	Up
GO:0071773	GO:0071773	cellular response to BMP stimulus	9/521	168/18866	0.0439132	0.221273	0.182996	GDF15/TGFB1/SPINT1/TMPRSS6/ITGA3/COMP/RUNX2/FSTL3/TMEM100	9	geneontology_Biological_Process	0.0172745	Up
GO:0043254	GO:0043254	regulation of protein-containing complex assembly	19/521	449/18866	0.044255	0.22274	0.18421	BID/DDB2/TENM1/SPTBN2/CDT1/TGFB1/EPS8/CSF2/MET/LGALS3/CDC42EP1/CLIP3/ICAM1/CDC42EP5/CDC42EP3/HRK/TMSB4X/STMN2/APOE	19	geneontology_Biological_Process	0.0364683	Up
GO:0006936	GO:0006936	muscle contraction	16/521	362/18866	0.044594	0.22419	0.185409	SCN1B/ADORA1/RYR1/ADRA1B/HCN4/KCNJ2/UCN/DYSF/ITGA2/NMU/STAC/COMP/PDE5A/F2R/MYBPH/TRIM63	16	geneontology_Biological_Process	0.0307102	Up
GO:0021602	GO:0021602	cranial nerve morphogenesis	3/521	29/18866	0.0449793	0.224846	0.185951	SEMA3F/NRP2/PLXNA4	3	geneontology_Biological_Process	0.00575816	Up
GO:0031063	GO:0031063	regulation of histone deacetylation	3/521	29/18866	0.0449793	0.224846	0.185951	LRRK2/SREBF1/UCN	3	geneontology_Biological_Process	0.00575816	Up
GO:0042634	GO:0042634	regulation of hair cycle	3/521	29/18866	0.0449793	0.224846	0.185951	CDH3/ARNTL/KRT17	3	geneontology_Biological_Process	0.00575816	Up
GO:0043032	GO:0043032	positive regulation of macrophage activation	3/521	29/18866	0.0449793	0.224846	0.185951	LRRK2/CTSC/TREM2	3	geneontology_Biological_Process	0.00575816	Up
GO:0071624	GO:0071624	positive regulation of granulocyte chemotaxis	3/521	29/18866	0.0449793	0.224846	0.185951	DYSF/MDK/DAPK2	3	geneontology_Biological_Process	0.00575816	Up
GO:0045598	GO:0045598	regulation of fat cell differentiation	8/521	143/18866	0.045075	0.225069	0.186136	E2F1/TGFB1/LPL/NR1D1/MMP11/LMO3/ALOX5/ARNTL	8	geneontology_Biological_Process	0.0153551	Up
GO:0051100	GO:0051100	negative regulation of binding	9/521	169/18866	0.0453049	0.225961	0.186873	E2F1/HMGA2/HEY2/LRRK2/MET/MDFI/CDKN1A/TMSB4X/SLPI	9	geneontology_Biological_Process	0.0172745	Up
GO:0051591	GO:0051591	response to cAMP	6/521	94/18866	0.0458453	0.227365	0.188034	HCN4/NOX4/CITED1/REN/SREBF1/COL1A1	6	geneontology_Biological_Process	0.0115163	Up
GO:0002686	GO:0002686	negative regulation of leukocyte migration	4/521	49/18866	0.0458958	0.227365	0.188034	ABR/ADORA1/DPP4/ADTRP	4	geneontology_Biological_Process	0.00767754	Up
GO:0010712	GO:0010712	regulation of collagen metabolic process	4/521	49/18866	0.0458958	0.227365	0.188034	TGFB1/UCN/ITGA2/F2R	4	geneontology_Biological_Process	0.00767754	Up
GO:0030850	GO:0030850	prostate gland development	4/521	49/18866	0.0458958	0.227365	0.188034	PLAG1/ALOX15B/ANXA1/TNC	4	geneontology_Biological_Process	0.00767754	Up
GO:0042398	GO:0042398	cellular modified amino acid biosynthetic process	4/521	49/18866	0.0458958	0.227365	0.188034	GGCT/MTHFD1L/GGT6/CARNS1	4	geneontology_Biological_Process	0.00767754	Up
GO:0048512	GO:0048512	circadian behavior	4/521	49/18866	0.0458958	0.227365	0.188034	ADORA1/CSF2/NR1D1/NMU	4	geneontology_Biological_Process	0.00767754	Up
GO:0007565	GO:0007565	female pregnancy	10/521	196/18866	0.0460323	0.227785	0.188382	TIMP1/UCN/ITGA2/ADM/ITGA3/ARHGDIB/PRDM1/IGFBP2/MMP7/SPP1	10	geneontology_Biological_Process	0.0191939	Up
GO:1901880	GO:1901880	negative regulation of protein depolymerization	5/521	71/18866	0.046379	0.229243	0.189588	SPTBN2/BMERB1/EPS8/TRIM54/STMN2	5	geneontology_Biological_Process	0.00959693	Up
GO:0006869	GO:0006869	lipid transport	17/521	393/18866	0.0464584	0.229379	0.1897	NPC2/THRSP/PRELID3A/ABCC3/REN/STRA6/PLA2G12B/KCNN4/ATP11A/SLC27A6/ANXA1/RETN/APOE/ERFE/APOC1/SFTPA1/SPP1	17	geneontology_Biological_Process	0.0326296	Up
GO:0060078	GO:0060078	regulation of postsynaptic membrane potential	8/521	144/18866	0.0466298	0.229523	0.189819	ADORA1/GABRB2/LRRK2/GABRD/DLG4/CELF4/GLRB/CBLN1	8	geneontology_Biological_Process	0.0153551	Up
GO:0061008	GO:0061008	hepaticobiliary system development	8/521	144/18866	0.0466298	0.229523	0.189819	CLDN1/CCND1/MET/ITGA2/MDK/FGF1/ANXA1/HPN	8	geneontology_Biological_Process	0.0153551	Up
GO:1901222	GO:1901222	regulation of NIK/NF-kappaB signaling	7/521	119/18866	0.047037	0.229523	0.189819	PTP4A3/NOD1/CHI3L1/TNFSF15/TCIM/TMSB4X/TREM2	7	geneontology_Biological_Process	0.0134357	Up
GO:0043583	GO:0043583	ear development	11/521	224/18866	0.0472797	0.229523	0.189819	ABR/GABRB2/JAG2/GRHL3/HEY2/ECE1/STRA6/SDC4/ALDH1A3/HPN/CXCL14	11	geneontology_Biological_Process	0.0211132	Up
GO:0048814	GO:0048814	regulation of dendrite morphogenesis	6/521	95/18866	0.0478478	0.229523	0.189819	SRCIN1/NGEF/LRRK2/TIAM1/LZTS1/TRPC5	6	geneontology_Biological_Process	0.0115163	Up
GO:0070167	GO:0070167	regulation of biomineral tissue development	6/521	95/18866	0.0478478	0.229523	0.189819	HEY2/TGFB1/KL/COMP/ECM1/ALOX5	6	geneontology_Biological_Process	0.0115163	Up
GO:0110149	GO:0110149	regulation of biomineralization	6/521	95/18866	0.0478478	0.229523	0.189819	HEY2/TGFB1/KL/COMP/ECM1/ALOX5	6	geneontology_Biological_Process	0.0115163	Up
GO:0007612	GO:0007612	learning	8/521	145/18866	0.0482193	0.229523	0.189819	RIN1/DLG4/STRA6/PPP1R1B/HRH1/UCN/C1QL1/NPTX2	8	geneontology_Biological_Process	0.0153551	Up
GO:0038127	GO:0038127	ERBB signaling pathway	8/521	145/18866	0.0482193	0.229523	0.189819	ADORA1/TGFA/TGFB1/GRB7/MVP/AGR2/PLAUR/ERBB3	8	geneontology_Biological_Process	0.0153551	Up
GO:0010038	GO:0010038	response to metal ion	16/521	366/18866	0.0483722	0.229523	0.189819	LRRK2/RYR1/CLDN1/CCND1/DLG4/LOXL2/SYT12/ICAM1/IGFBP2/ADCY8/FSTL3/CPNE4/SYT1/AOC1/SLC30A2/SLC30A3	16	geneontology_Biological_Process	0.0307102	Up
GO:0003084	GO:0003084	positive regulation of systemic arterial blood pressure	2/521	13/18866	0.0485511	0.229523	0.189819	ADORA1/NMU	2	geneontology_Biological_Process	0.00383877	Up
GO:0016322	GO:0016322	neuron remodeling	2/521	13/18866	0.0485511	0.229523	0.189819	CX3CL1/C1QL1	2	geneontology_Biological_Process	0.00383877	Up
GO:0021681	GO:0021681	cerebellar granular layer development	2/521	13/18866	0.0485511	0.229523	0.189819	MDK/CBLN1	2	geneontology_Biological_Process	0.00383877	Up
GO:0030002	GO:0030002	cellular anion homeostasis	2/521	13/18866	0.0485511	0.229523	0.189819	XPR1/SLC34A2	2	geneontology_Biological_Process	0.00383877	Up
GO:0030320	GO:0030320	cellular monovalent inorganic anion homeostasis	2/521	13/18866	0.0485511	0.229523	0.189819	XPR1/SLC34A2	2	geneontology_Biological_Process	0.00383877	Up
GO:0031115	GO:0031115	negative regulation of microtubule polymerization	2/521	13/18866	0.0485511	0.229523	0.189819	CLIP3/STMN2	2	geneontology_Biological_Process	0.00383877	Up
GO:0031650	GO:0031650	regulation of heat generation	2/521	13/18866	0.0485511	0.229523	0.189819	NMU/APLN	2	geneontology_Biological_Process	0.00383877	Up
GO:0032352	GO:0032352	positive regulation of hormone metabolic process	2/521	13/18866	0.0485511	0.229523	0.189819	ADM/HPN	2	geneontology_Biological_Process	0.00383877	Up
GO:0034370	GO:0034370	triglyceride-rich lipoprotein particle remodeling	2/521	13/18866	0.0485511	0.229523	0.189819	LPL/APOE	2	geneontology_Biological_Process	0.00383877	Up
GO:0038007	GO:0038007	netrin-activated signaling pathway	2/521	13/18866	0.0485511	0.229523	0.189819	UNC5B/UNC5CL	2	geneontology_Biological_Process	0.00383877	Up
GO:0042921	GO:0042921	glucocorticoid receptor signaling pathway	2/521	13/18866	0.0485511	0.229523	0.189819	LMO3/ARNTL	2	geneontology_Biological_Process	0.00383877	Up
GO:0045741	GO:0045741	positive regulation of epidermal growth factor-activated receptor activity	2/521	13/18866	0.0485511	0.229523	0.189819	ADORA1/TGFA	2	geneontology_Biological_Process	0.00383877	Up
GO:0048266	GO:0048266	behavioral response to pain	2/521	13/18866	0.0485511	0.229523	0.189819	LPAR5/VWA1	2	geneontology_Biological_Process	0.00383877	Up
GO:0060100	GO:0060100	positive regulation of phagocytosis, engulfment	2/521	13/18866	0.0485511	0.229523	0.189819	ITGA2/TREM2	2	geneontology_Biological_Process	0.00383877	Up
GO:0060312	GO:0060312	regulation of blood vessel remodeling	2/521	13/18866	0.0485511	0.229523	0.189819	ABR/TGFB1	2	geneontology_Biological_Process	0.00383877	Up
GO:0061029	GO:0061029	eyelid development in camera-type eye	2/521	13/18866	0.0485511	0.229523	0.189819	GRHL3/STRA6	2	geneontology_Biological_Process	0.00383877	Up
GO:0070914	GO:0070914	UV-damage excision repair	2/521	13/18866	0.0485511	0.229523	0.189819	DDB2/H2AW	2	geneontology_Biological_Process	0.00383877	Up
GO:1900025	GO:1900025	negative regulation of substrate adhesion-dependent cell spreading	2/521	13/18866	0.0485511	0.229523	0.189819	TACSTD2/POSTN	2	geneontology_Biological_Process	0.00383877	Up
GO:1900272	GO:1900272	negative regulation of long-term synaptic potentiation	2/521	13/18866	0.0485511	0.229523	0.189819	ADORA1/APOE	2	geneontology_Biological_Process	0.00383877	Up
GO:1902563	GO:1902563	regulation of neutrophil activation	2/521	13/18866	0.0485511	0.229523	0.189819	ABR/CD177	2	geneontology_Biological_Process	0.00383877	Up
GO:1905155	GO:1905155	positive regulation of membrane invagination	2/521	13/18866	0.0485511	0.229523	0.189819	ITGA2/TREM2	2	geneontology_Biological_Process	0.00383877	Up
GO:0009119	GO:0009119	ribonucleoside metabolic process	5/521	72/18866	0.048759	0.229523	0.189819	CDA/LRRK2/UPP1/APOBEC3H/PNP	5	geneontology_Biological_Process	0.00959693	Up
GO:0061035	GO:0061035	regulation of cartilage development	5/521	72/18866	0.048759	0.229523	0.189819	BMP1/LOXL2/MDK/TGFBR1/RUNX2	5	geneontology_Biological_Process	0.00959693	Up
GO:0003044	GO:0003044	regulation of systemic arterial blood pressure mediated by a chemical signal	4/521	50/18866	0.0488419	0.229523	0.189819	ADRA1B/ECE1/REN/F2R	4	geneontology_Biological_Process	0.00767754	Up
GO:0007622	GO:0007622	rhythmic behavior	4/521	50/18866	0.0488419	0.229523	0.189819	ADORA1/CSF2/NR1D1/NMU	4	geneontology_Biological_Process	0.00767754	Up
GO:0043616	GO:0043616	keratinocyte proliferation	4/521	50/18866	0.0488419	0.229523	0.189819	CDH3/MDK/SFN/CD109	4	geneontology_Biological_Process	0.00767754	Up
GO:0045540	GO:0045540	regulation of cholesterol biosynthetic process	4/521	50/18866	0.0488419	0.229523	0.189819	SREBF1/FGF1/SCD/APOE	4	geneontology_Biological_Process	0.00767754	Up
GO:0046850	GO:0046850	regulation of bone remodeling	4/521	50/18866	0.0488419	0.229523	0.189819	MDK/DCSTAMP/SIGLEC15/SPP1	4	geneontology_Biological_Process	0.00767754	Up
GO:0106118	GO:0106118	regulation of sterol biosynthetic process	4/521	50/18866	0.0488419	0.229523	0.189819	SREBF1/FGF1/SCD/APOE	4	geneontology_Biological_Process	0.00767754	Up
GO:0010800	GO:0010800	positive regulation of peptidyl-threonine phosphorylation	3/521	30/18866	0.0489863	0.229523	0.189819	TGFB1/TRPC5/CHI3L1	3	geneontology_Biological_Process	0.00575816	Up
GO:0030511	GO:0030511	positive regulation of transforming growth factor beta receptor signaling pathway	3/521	30/18866	0.0489863	0.229523	0.189819	CDKN2B/CITED1/LRG1	3	geneontology_Biological_Process	0.00575816	Up
GO:0060055	GO:0060055	angiogenesis involved in wound healing	3/521	30/18866	0.0489863	0.229523	0.189819	CX3CL1/GPR4/ALOX5	3	geneontology_Biological_Process	0.00575816	Up
GO:0060142	GO:0060142	regulation of syncytium formation by plasma membrane fusion	3/521	30/18866	0.0489863	0.229523	0.189819	GDF15/DCSTAMP/TREM2	3	geneontology_Biological_Process	0.00575816	Up
GO:0061082	GO:0061082	myeloid leukocyte cytokine production	3/521	30/18866	0.0489863	0.229523	0.189819	TGFB1/GPRC5B/HLA-G	3	geneontology_Biological_Process	0.00575816	Up
GO:0070168	GO:0070168	negative regulation of biomineral tissue development	3/521	30/18866	0.0489863	0.229523	0.189819	HEY2/TGFB1/ECM1	3	geneontology_Biological_Process	0.00575816	Up
GO:0110150	GO:0110150	negative regulation of biomineralization	3/521	30/18866	0.0489863	0.229523	0.189819	HEY2/TGFB1/ECM1	3	geneontology_Biological_Process	0.00575816	Up
GO:1900027	GO:1900027	regulation of ruffle assembly	3/521	30/18866	0.0489863	0.229523	0.189819	EPS8/ICAM1/TACSTD2	3	geneontology_Biological_Process	0.00575816	Up
GO:1903846	GO:1903846	positive regulation of cellular response to transforming growth factor beta stimulus	3/521	30/18866	0.0489863	0.229523	0.189819	CDKN2B/CITED1/LRG1	3	geneontology_Biological_Process	0.00575816	Up
GO:0010959	GO:0010959	regulation of metal ion transport	17/521	396/18866	0.0492358	0.230202	0.190381	SCN1B/ADORA1/FXYD5/KCNJ2/CX3CL1/TESC/UCN/DYSF/LGALS3/CRACR2B/ICAM1/STAC/NKAIN4/CACNB1/F2R/APLNR/TREM2	17	geneontology_Biological_Process	0.0326296	Up
GO:0070482	GO:0070482	response to oxygen levels	17/521	396/18866	0.0492358	0.230202	0.190381	PLEKHN1/E2F1/ADORA1/DPP4/RYR1/NOX4/LOXL2/ITGA2/ADM/PLAU/B3GAT1/CDKN1A/ICAM1/VASN/POSTN/PMAIP1/COL1A1	17	geneontology_Biological_Process	0.0326296	Up
GO:0001906	GO:0001906	cell killing	9/521	172/18866	0.0496556	0.231919	0.191801	ULBP2/CTSH/RAB27A/ICAM1/CTSC/CD55/CCL13/CD1A/HLA-G	9	geneontology_Biological_Process	0.0172745	Up
GO:0044706	GO:0044706	multi-multicellular organism process	11/521	226/18866	0.0498134	0.23241	0.192207	TIMP1/UCN/ITGA2/ADM/ITGA3/ARHGDIB/PRDM1/IGFBP2/ARNTL/MMP7/SPP1	11	geneontology_Biological_Process	0.0211132	Up
GO:0032612	GO:0032612	interleukin-1 production	7/521	121/18866	0.0506454	0.236042	0.19521	CX3CL1/LPL/NOD1/F2R/INAVA/TREM2/ANXA1	7	geneontology_Biological_Process	0.0134357	Up
GO:0006633	GO:0006633	fatty acid biosynthetic process	9/521	173/18866	0.051165	0.237667	0.196555	LIPH/LPL/OLAH/ALOX15B/ALOX5/ANXA1/MLXIPL/SCD/APOC1	9	geneontology_Biological_Process	0.0172745	Up
GO:0072401	GO:0072401	signal transduction involved in DNA integrity checkpoint	5/521	73/18866	0.0512098	0.237667	0.196555	E2F1/SOX4/SFN/CDKN1A/MUC1	5	geneontology_Biological_Process	0.00959693	Up
GO:0072422	GO:0072422	signal transduction involved in DNA damage checkpoint	5/521	73/18866	0.0512098	0.237667	0.196555	E2F1/SOX4/SFN/CDKN1A/MUC1	5	geneontology_Biological_Process	0.00959693	Up
GO:1901292	GO:1901292	nucleoside phosphate catabolic process	5/521	73/18866	0.0512098	0.237667	0.196555	UPP1/PDE9A/PDE5A/ENTPD2/PNP	5	geneontology_Biological_Process	0.00959693	Up
GO:1990778	GO:1990778	protein localization to cell periphery	15/521	340/18866	0.0513094	0.237879	0.19673	TGFB1/DLG4/AGR2/TESC/LGALS3/ITGA3/CLIP3/CDH2/STAC/MISP/CACNG4/PALM/TREM2/SHISA6/RAMP1	15	geneontology_Biological_Process	0.0287908	Up
GO:1901654	GO:1901654	response to ketone	10/521	200/18866	0.0514826	0.238431	0.197187	TGFB1/CLDN1/CCND1/SREBF1/CATSPER1/CDKN1A/ICAM1/ADCY8/TNC/SPP1	10	geneontology_Biological_Process	0.0191939	Up
GO:0021545	GO:0021545	cranial nerve development	4/521	51/18866	0.0518899	0.238631	0.197352	SEMA3F/NRP2/PLXNA4/ERBB3	4	geneontology_Biological_Process	0.00767754	Up
GO:0048146	GO:0048146	positive regulation of fibroblast proliferation	4/521	51/18866	0.0518899	0.238631	0.197352	E2F1/FN1/S100A6/CDKN1A	4	geneontology_Biological_Process	0.00767754	Up
GO:0071827	GO:0071827	plasma lipoprotein particle organization	4/521	51/18866	0.0518899	0.238631	0.197352	BMP1/LPL/APOE/APOC1	4	geneontology_Biological_Process	0.00767754	Up
GO:0090102	GO:0090102	cochlea development	4/521	51/18866	0.0518899	0.238631	0.197352	GABRB2/GRHL3/HEY2/HPN	4	geneontology_Biological_Process	0.00767754	Up
GO:0032651	GO:0032651	regulation of interleukin-1 beta production	6/521	97/18866	0.0520128	0.238631	0.197352	CX3CL1/LPL/NOD1/F2R/INAVA/TREM2	6	geneontology_Biological_Process	0.0115163	Up
GO:0046634	GO:0046634	regulation of alpha-beta T cell activation	6/521	97/18866	0.0520128	0.238631	0.197352	RUNX1/PRDM1/EBI3/CD55/ANXA1/PNP	6	geneontology_Biological_Process	0.0115163	Up
GO:0050764	GO:0050764	regulation of phagocytosis	6/521	97/18866	0.0520128	0.238631	0.197352	ABR/MFGE8/DYSF/ITGA2/RAB27A/TREM2	6	geneontology_Biological_Process	0.0115163	Up
GO:1990868	GO:1990868	response to chemokine	6/521	97/18866	0.0520128	0.238631	0.197352	CX3CL1/TREM2/CCL13/CCL20/CCL17/CCL18	6	geneontology_Biological_Process	0.0115163	Up
GO:1990869	GO:1990869	cellular response to chemokine	6/521	97/18866	0.0520128	0.238631	0.197352	CX3CL1/TREM2/CCL13/CCL20/CCL17/CCL18	6	geneontology_Biological_Process	0.0115163	Up
GO:0006690	GO:0006690	icosanoid metabolic process	7/521	122/18866	0.0525133	0.239579	0.198136	CYP2S1/ALOX15B/GGT6/CYP1B1/GGT2/ALOX5/ANXA1	7	geneontology_Biological_Process	0.0134357	Up
GO:0001659	GO:0001659	temperature homeostasis	9/521	174/18866	0.0527041	0.239579	0.198136	ADORA1/NR1D1/LCN2/NMU/APLN/MFAP2/ARNTL/SCD/G0S2	9	geneontology_Biological_Process	0.0172745	Up
GO:0003205	GO:0003205	cardiac chamber development	9/521	174/18866	0.0527041	0.239579	0.198136	PLXND1/HEY2/TGFB1/STRA6/NRP2/SOX4/PRDM1/TGFBR1/DHRS3	9	geneontology_Biological_Process	0.0172745	Up
GO:0090257	GO:0090257	regulation of muscle system process	12/521	256/18866	0.0527519	0.239579	0.198136	ADORA1/ADRA1B/HCN4/KCNJ2/PDE9A/UCN/ITGA2/NMU/PDE5A/F2R/MYBPH/TRIM63	12	geneontology_Biological_Process	0.0230326	Up
GO:0008045	GO:0008045	motor neuron axon guidance	3/521	31/18866	0.0531615	0.239579	0.198136	SEMA3F/SLIT1/PLXNA4	3	geneontology_Biological_Process	0.00575816	Up
GO:0031114	GO:0031114	regulation of microtubule depolymerization	3/521	31/18866	0.0531615	0.239579	0.198136	BMERB1/TRIM54/STMN2	3	geneontology_Biological_Process	0.00575816	Up
GO:0032770	GO:0032770	positive regulation of monooxygenase activity	3/521	31/18866	0.0531615	0.239579	0.198136	CDH3/NOD1/APOE	3	geneontology_Biological_Process	0.00575816	Up
GO:0034368	GO:0034368	protein-lipid complex remodeling	3/521	31/18866	0.0531615	0.239579	0.198136	LPL/APOE/APOC1	3	geneontology_Biological_Process	0.00575816	Up
GO:0034369	GO:0034369	plasma lipoprotein particle remodeling	3/521	31/18866	0.0531615	0.239579	0.198136	LPL/APOE/APOC1	3	geneontology_Biological_Process	0.00575816	Up
GO:0034377	GO:0034377	plasma lipoprotein particle assembly	3/521	31/18866	0.0531615	0.239579	0.198136	BMP1/APOE/APOC1	3	geneontology_Biological_Process	0.00575816	Up
GO:0043171	GO:0043171	peptide catabolic process	3/521	31/18866	0.0531615	0.239579	0.198136	ECE1/CTSH/GGT2	3	geneontology_Biological_Process	0.00575816	Up
GO:0045737	GO:0045737	positive regulation of cyclin-dependent protein serine/threonine kinase activity	3/521	31/18866	0.0531615	0.239579	0.198136	CCND1/CCND2/CKS2	3	geneontology_Biological_Process	0.00575816	Up
GO:0045987	GO:0045987	positive regulation of smooth muscle contraction	3/521	31/18866	0.0531615	0.239579	0.198136	ITGA2/NMU/F2R	3	geneontology_Biological_Process	0.00575816	Up
GO:0060292	GO:0060292	long-term synaptic depression	3/521	31/18866	0.0531615	0.239579	0.198136	ADORA1/ADCY8/CBLN1	3	geneontology_Biological_Process	0.00575816	Up
GO:0090075	GO:0090075	relaxation of muscle	3/521	31/18866	0.0531615	0.239579	0.198136	ADORA1/KCNJ2/PDE5A	3	geneontology_Biological_Process	0.00575816	Up
GO:1902230	GO:1902230	negative regulation of intrinsic apoptotic signaling pathway in response to DNA damage	3/521	31/18866	0.0531615	0.239579	0.198136	BID/CD44/MUC1	3	geneontology_Biological_Process	0.00575816	Up
GO:1902624	GO:1902624	positive regulation of neutrophil migration	3/521	31/18866	0.0531615	0.239579	0.198136	DYSF/MDK/DAPK2	3	geneontology_Biological_Process	0.00575816	Up
GO:0071901	GO:0071901	negative regulation of protein serine/threonine kinase activity	8/521	148/18866	0.0531976	0.239579	0.198136	CDKN2B/DUSP4/DUSP6/CDKN2A/SFN/CDKN1A/DUSP5/APOE	8	geneontology_Biological_Process	0.0153551	Up
GO:0009101	GO:0009101	glycoprotein biosynthetic process	15/521	342/18866	0.053456	0.240498	0.198896	TUSC3/GALNT7/B3GNT7/B3GNT8/B3GNT3/ST8SIA4/B3GAT1/MUC21/ST3GAL5/MGAT3/ST6GALNAC5/CSPG4/RAMP1/MUC1/HS6ST2	15	geneontology_Biological_Process	0.0287908	Up
GO:0072395	GO:0072395	signal transduction involved in cell cycle checkpoint	5/521	74/18866	0.0537315	0.241245	0.199513	E2F1/SOX4/SFN/CDKN1A/MUC1	5	geneontology_Biological_Process	0.00959693	Up
GO:2001259	GO:2001259	positive regulation of cation channel activity	5/521	74/18866	0.0537315	0.241245	0.199513	STAC/CACNG4/CTSS/TMSB4X/TREM2	5	geneontology_Biological_Process	0.00959693	Up
GO:0014020	GO:0014020	primary neural tube formation	6/521	98/18866	0.0541756	0.242744	0.200754	GRHL3/TGFB1/SPINT1/MTHFD1L/SDC4/ADM	6	geneontology_Biological_Process	0.0115163	Up
GO:0050810	GO:0050810	regulation of steroid biosynthetic process	6/521	98/18866	0.0541756	0.242744	0.200754	SREBF1/NR1D1/ADM/FGF1/SCD/APOE	6	geneontology_Biological_Process	0.0115163	Up
GO:0007179	GO:0007179	transforming growth factor beta receptor signaling pathway	10/521	202/18866	0.0543622	0.243116	0.201061	GDF15/CDKN2B/TGFB1/CITED1/LRG1/ITGA3/IL17RD/TGFBR1/VASN/CD109	10	geneontology_Biological_Process	0.0191939	Up
GO:0002761	GO:0002761	regulation of myeloid leukocyte differentiation	7/521	123/18866	0.054424	0.243116	0.201061	TGFB1/RUNX1/TESC/DCSTAMP/SIGLEC15/FSTL3/TREM2	7	geneontology_Biological_Process	0.0134357	Up
GO:0007173	GO:0007173	epidermal growth factor receptor signaling pathway	7/521	123/18866	0.054424	0.243116	0.201061	ADORA1/TGFA/TGFB1/GRB7/MVP/AGR2/PLAUR	7	geneontology_Biological_Process	0.0134357	Up
GO:0007249	GO:0007249	I-kappaB kinase/NF-kappaB signaling	13/521	286/18866	0.055005	0.244542	0.20224	CX3CL1/NR1D1/UNC5CL/EDA2R/GPRC5B/NOD1/F2R/ECM1/TGM2/INAVA/LGALS1/LURAP1L/PELI1	13	geneontology_Biological_Process	0.024952	Up
GO:0032330	GO:0032330	regulation of chondrocyte differentiation	4/521	52/18866	0.0550394	0.244542	0.20224	LOXL2/MDK/TGFBR1/RUNX2	4	geneontology_Biological_Process	0.00767754	Up
GO:0051496	GO:0051496	positive regulation of stress fiber assembly	4/521	52/18866	0.0550394	0.244542	0.20224	FHOD1/NOX4/SDC4/TGFBR1	4	geneontology_Biological_Process	0.00767754	Up
GO:2001238	GO:2001238	positive regulation of extrinsic apoptotic signaling pathway	4/521	52/18866	0.0550394	0.244542	0.20224	BID/TNFRSF12A/G0S2/PMAIP1	4	geneontology_Biological_Process	0.00767754	Up
GO:0002475	GO:0002475	antigen processing and presentation via MHC class Ib	2/521	14/18866	0.0556307	0.244542	0.20224	CD1A/HLA-G	2	geneontology_Biological_Process	0.00383877	Up
GO:0009214	GO:0009214	cyclic nucleotide catabolic process	2/521	14/18866	0.0556307	0.244542	0.20224	PDE9A/PDE5A	2	geneontology_Biological_Process	0.00383877	Up
GO:0010838	GO:0010838	positive regulation of keratinocyte proliferation	2/521	14/18866	0.0556307	0.244542	0.20224	CDH3/MDK	2	geneontology_Biological_Process	0.00383877	Up
GO:0010872	GO:0010872	regulation of cholesterol esterification	2/521	14/18866	0.0556307	0.244542	0.20224	APOE/APOC1	2	geneontology_Biological_Process	0.00383877	Up
GO:0031958	GO:0031958	corticosteroid receptor signaling pathway	2/521	14/18866	0.0556307	0.244542	0.20224	LMO3/ARNTL	2	geneontology_Biological_Process	0.00383877	Up
GO:0032488	GO:0032488	Cdc42 protein signal transduction	2/521	14/18866	0.0556307	0.244542	0.20224	RHOV/APOE	2	geneontology_Biological_Process	0.00383877	Up
GO:0035358	GO:0035358	regulation of peroxisome proliferator activated receptor signaling pathway	2/521	14/18866	0.0556307	0.244542	0.20224	ALOX15B/LMO3	2	geneontology_Biological_Process	0.00383877	Up
GO:0043922	GO:0043922	negative regulation by host of viral transcription	2/521	14/18866	0.0556307	0.244542	0.20224	HMGA2/POU2F3	2	geneontology_Biological_Process	0.00383877	Up
GO:0044794	GO:0044794	positive regulation by host of viral process	2/521	14/18866	0.0556307	0.244542	0.20224	PC/APOE	2	geneontology_Biological_Process	0.00383877	Up
GO:0060707	GO:0060707	trophoblast giant cell differentiation	2/521	14/18866	0.0556307	0.244542	0.20224	MDFI/PRDM1	2	geneontology_Biological_Process	0.00383877	Up
GO:0072672	GO:0072672	neutrophil extravasation	2/521	14/18866	0.0556307	0.244542	0.20224	MDK/CD177	2	geneontology_Biological_Process	0.00383877	Up
GO:0090399	GO:0090399	replicative senescence	2/521	14/18866	0.0556307	0.244542	0.20224	CDKN2A/CDKN1A	2	geneontology_Biological_Process	0.00383877	Up
GO:0010634	GO:0010634	positive regulation of epithelial cell migration	9/521	176/18866	0.0558726	0.245361	0.202918	TGFB1/MET/CTSH/ITGA2/NRP2/ITGA3/FGF1/TMSB4X/ANXA1	9	geneontology_Biological_Process	0.0172745	Up
GO:0000082	GO:0000082	G1/S transition of mitotic cell cycle	13/521	287/18866	0.0562389	0.245388	0.20294	E2F1/CDKN2B/BID/CDT1/CCND1/CCND2/SOX4/CDKN2A/SFN/CDKN1A/CCNA1/ANXA1/MUC1	13	geneontology_Biological_Process	0.024952	Up
GO:0001707	GO:0001707	mesoderm formation	5/521	75/18866	0.0563241	0.245388	0.20294	HMGA2/ITGA2/ITGA3/WNT3/ITGB4	5	geneontology_Biological_Process	0.00959693	Up
GO:0015909	GO:0015909	long-chain fatty acid transport	5/521	75/18866	0.0563241	0.245388	0.20294	THRSP/PLA2G12B/SLC27A6/ANXA1/APOE	5	geneontology_Biological_Process	0.00959693	Up
GO:0038034	GO:0038034	signal transduction in absence of ligand	5/521	75/18866	0.0563241	0.245388	0.20294	UNC5B/CSF2/CX3CL1/LCN2/ERBB3	5	geneontology_Biological_Process	0.00959693	Up
GO:0043627	GO:0043627	response to estrogen	5/521	75/18866	0.0563241	0.245388	0.20294	CCND1/CITED1/SLC34A2/IGFBP2/KRT19	5	geneontology_Biological_Process	0.00959693	Up
GO:0045685	GO:0045685	regulation of glial cell differentiation	5/521	75/18866	0.0563241	0.245388	0.20294	TGFB1/SPINT1/NR1D1/MDK/TNFRSF21	5	geneontology_Biological_Process	0.00959693	Up
GO:0050805	GO:0050805	negative regulation of synaptic transmission	5/521	75/18866	0.0563241	0.245388	0.20294	ADORA1/LRRK2/CELF4/ADCY8/CBLN1	5	geneontology_Biological_Process	0.00959693	Up
GO:0097192	GO:0097192	extrinsic apoptotic signaling pathway in absence of ligand	5/521	75/18866	0.0563241	0.245388	0.20294	UNC5B/CSF2/CX3CL1/LCN2/ERBB3	5	geneontology_Biological_Process	0.00959693	Up
GO:0007044	GO:0007044	cell-substrate junction assembly	6/521	99/18866	0.0563922	0.245442	0.202985	FN1/LAMB3/SDC4/ITGA2/CD151/ITGB4	6	geneontology_Biological_Process	0.0115163	Up
GO:0032271	GO:0032271	regulation of protein polymerization	11/521	231/18866	0.056545	0.245781	0.203265	TENM1/SPTBN2/EPS8/MET/CDC42EP1/CLIP3/ICAM1/CDC42EP5/CDC42EP3/TMSB4X/STMN2	11	geneontology_Biological_Process	0.0211132	Up
GO:0035148	GO:0035148	tube formation	8/521	150/18866	0.056693	0.245781	0.203265	GRHL3/TGFB1/SPINT1/MTHFD1L/SDC4/ADM/SOX4/TGM2	8	geneontology_Biological_Process	0.0153551	Up
GO:0070665	GO:0070665	positive regulation of leukocyte proliferation	8/521	150/18866	0.056693	0.245781	0.203265	CDKN1A/IGFBP2/EBI3/CD55/ANXA1/PELI1/PNP/VTCN1	8	geneontology_Biological_Process	0.0153551	Up
GO:0090263	GO:0090263	positive regulation of canonical Wnt signaling pathway	8/521	150/18866	0.056693	0.245781	0.203265	CDH3/SCEL/TGFB1/LRRK2/SOX4/GPRC5B/ARNTL/COL1A1	8	geneontology_Biological_Process	0.0153551	Up
GO:0060348	GO:0060348	bone development	10/521	204/18866	0.0573463	0.246143	0.203564	COL13A1/RYR1/NAB2/SIGLEC15/COMP/DHRS3/MMP16/RUNX2/ALPL/COL1A1	10	geneontology_Biological_Process	0.0191939	Up
GO:0060541	GO:0060541	respiratory system development	10/521	204/18866	0.0573463	0.246143	0.203564	STRA6/AGR2/CTSH/SREBF1/ALDH1A3/ITGA3/FGF1/CHI3L1/FSTL3/TNC	10	geneontology_Biological_Process	0.0191939	Up
GO:1903708	GO:1903708	positive regulation of hemopoiesis	10/521	204/18866	0.0573463	0.246143	0.203564	TGFB1/RUNX1/TESC/MDK/DCSTAMP/SOX4/TREM2/ANXA1/PNP/HLA-G	10	geneontology_Biological_Process	0.0191939	Up
GO:0002063	GO:0002063	chondrocyte development	3/521	32/18866	0.0575019	0.246143	0.203564	COMP/ECM1/RUNX2	3	geneontology_Biological_Process	0.00575816	Up
GO:0010743	GO:0010743	regulation of macrophage derived foam cell differentiation	3/521	32/18866	0.0575019	0.246143	0.203564	CSF2/LPL/ALOX15B	3	geneontology_Biological_Process	0.00575816	Up
GO:0034367	GO:0034367	protein-containing complex remodeling	3/521	32/18866	0.0575019	0.246143	0.203564	LPL/APOE/APOC1	3	geneontology_Biological_Process	0.00575816	Up
GO:0035767	GO:0035767	endothelial cell chemotaxis	3/521	32/18866	0.0575019	0.246143	0.203564	MET/FGF1/TMSB4X	3	geneontology_Biological_Process	0.00575816	Up
GO:0045589	GO:0045589	regulation of regulatory T cell differentiation	3/521	32/18866	0.0575019	0.246143	0.203564	RUNX1/MDK/HLA-G	3	geneontology_Biological_Process	0.00575816	Up
GO:0060317	GO:0060317	cardiac epithelial to mesenchymal transition	3/521	32/18866	0.0575019	0.246143	0.203564	HEY2/TGFBR1/TMEM100	3	geneontology_Biological_Process	0.00575816	Up
GO:0071295	GO:0071295	cellular response to vitamin	3/521	32/18866	0.0575019	0.246143	0.203564	TNC/POSTN/COL1A1	3	geneontology_Biological_Process	0.00575816	Up
GO:0097106	GO:0097106	postsynaptic density organization	3/521	32/18866	0.0575019	0.246143	0.203564	IL1RAP/CDH2/CBLN1	3	geneontology_Biological_Process	0.00575816	Up
GO:1902235	GO:1902235	regulation of endoplasmic reticulum stress-induced intrinsic apoptotic signaling pathway	3/521	32/18866	0.0575019	0.246143	0.203564	LRRK2/RNF183/PMAIP1	3	geneontology_Biological_Process	0.00575816	Up
GO:0030324	GO:0030324	lung development	9/521	177/18866	0.0575022	0.246143	0.203564	STRA6/AGR2/CTSH/SREBF1/ITGA3/FGF1/CHI3L1/FSTL3/TNC	9	geneontology_Biological_Process	0.0172745	Up
GO:0007015	GO:0007015	actin filament organization	18/521	434/18866	0.0575684	0.246187	0.203601	SHROOM4/TENM1/SPTBN2/FHOD1/NOX4/EPS8/SDC4/CX3CL1/MET/CDC42EP1/ESPN/ICAM1/TGFBR1/TACSTD2/CDC42EP5/CDC42EP3/TMSB4X/MYO1G	18	geneontology_Biological_Process	0.0345489	Up
GO:0019882	GO:0019882	antigen processing and presentation	11/521	232/18866	0.0579604	0.247623	0.204789	SPTBN2/CTSH/RAB27A/NOD1/ICAM1/CTSS/TREM2/CD1A/CD207/HLA-G/HLA-DQB2	11	geneontology_Biological_Process	0.0211132	Up
GO:0045599	GO:0045599	negative regulation of fat cell differentiation	4/521	53/18866	0.05829	0.247711	0.204861	E2F1/TGFB1/MMP11/ARNTL	4	geneontology_Biological_Process	0.00767754	Up
GO:0045744	GO:0045744	negative regulation of G protein-coupled receptor signaling pathway	4/521	53/18866	0.05829	0.247711	0.204861	MET/ADM/APLN/APLNR	4	geneontology_Biological_Process	0.00767754	Up
GO:0048168	GO:0048168	regulation of neuronal synaptic plasticity	4/521	53/18866	0.05829	0.247711	0.204861	DLG4/RASGRF1/SHISA6/APOE	4	geneontology_Biological_Process	0.00767754	Up
GO:2000772	GO:2000772	regulation of cellular senescence	4/521	53/18866	0.05829	0.247711	0.204861	HMGA2/CDKN2A/ARNTL/HLA-G	4	geneontology_Biological_Process	0.00767754	Up
GO:0001838	GO:0001838	embryonic epithelial tube formation	7/521	125/18866	0.0583742	0.247711	0.204861	GRHL3/TGFB1/SPINT1/MTHFD1L/SDC4/ADM/SOX4	7	geneontology_Biological_Process	0.0134357	Up
GO:0035270	GO:0035270	endocrine system development	7/521	125/18866	0.0583742	0.247711	0.204861	STRA6/MDK/SOX4/TGFBR1/FSTL3/ARNTL/ANXA1	7	geneontology_Biological_Process	0.0134357	Up
GO:0048593	GO:0048593	camera-type eye morphogenesis	7/521	125/18866	0.0583742	0.247711	0.204861	FJX1/STRA6/ALDH1A3/COL8A1/SDK1/COL8A2/AQP5	7	geneontology_Biological_Process	0.0134357	Up
GO:0051224	GO:0051224	negative regulation of protein transport	8/521	151/18866	0.0584942	0.247743	0.204888	SRCIN1/LRRK2/SREBF1/F2R/ADTRP/ANXA1/APOE/INHBB	8	geneontology_Biological_Process	0.0153551	Up
GO:2001056	GO:2001056	positive regulation of cysteine-type endopeptidase activity	8/521	151/18866	0.0584942	0.247743	0.204888	BBC3/BID/CTSH/NOD1/PERP/TNFSF15/F2R/PMAIP1	8	geneontology_Biological_Process	0.0153551	Up
GO:0003281	GO:0003281	ventricular septum development	5/521	76/18866	0.0589876	0.249354	0.20622	HEY2/STRA6/SOX4/PRDM1/TGFBR1	5	geneontology_Biological_Process	0.00959693	Up
GO:0008306	GO:0008306	associative learning	5/521	76/18866	0.0589876	0.249354	0.20622	RIN1/PPP1R1B/HRH1/UCN/NPTX2	5	geneontology_Biological_Process	0.00959693	Up
GO:0006941	GO:0006941	striated muscle contraction	9/521	178/18866	0.0591621	0.249852	0.206632	SCN1B/ADORA1/ADRA1B/HCN4/KCNJ2/UCN/STAC/PDE5A/MYBPH	9	geneontology_Biological_Process	0.0172745	Up
GO:2001234	GO:2001234	negative regulation of apoptotic signaling pathway	11/521	233/18866	0.0593991	0.250613	0.207261	BID/UNC5B/LRRK2/CSF2/CX3CL1/LGALS3/ICAM1/CD44/TGFBR1/PLAUR/MUC1	11	geneontology_Biological_Process	0.0211132	Up
GO:1902105	GO:1902105	regulation of leukocyte differentiation	13/521	290/18866	0.0600527	0.253129	0.209342	TGFB1/RUNX1/TESC/MDK/DCSTAMP/SOX4/PRDM1/SIGLEC15/FSTL3/TREM2/ANXA1/PNP/HLA-G	13	geneontology_Biological_Process	0.024952	Up
GO:0042594	GO:0042594	response to starvation	10/521	206/18866	0.0604358	0.2545	0.210476	LRRK2/UPP1/XPR1/SREBF1/ADM/CDKN1A/SSTR3/AOC1/PMAIP1/INHBB	10	geneontology_Biological_Process	0.0191939	Up
GO:0003012	GO:0003012	muscle system process	19/521	467/18866	0.0607077	0.255401	0.211221	SCN1B/ADORA1/HEY2/RYR1/ADRA1B/HCN4/TIAM1/KCNJ2/PDE9A/UCN/DYSF/ITGA2/NMU/STAC/COMP/PDE5A/F2R/MYBPH/TRIM63	19	geneontology_Biological_Process	0.0364683	Up
GO:0015908	GO:0015908	fatty acid transport	6/521	101/18866	0.0609869	0.256087	0.211788	THRSP/PLA2G12B/SLC27A6/ANXA1/APOE/ERFE	6	geneontology_Biological_Process	0.0115163	Up
GO:0042102	GO:0042102	positive regulation of T cell proliferation	6/521	101/18866	0.0609869	0.256087	0.211788	IGFBP2/EBI3/CD55/ANXA1/PNP/VTCN1	6	geneontology_Biological_Process	0.0115163	Up
GO:0032409	GO:0032409	regulation of transporter activity	13/521	291/18866	0.0613617	0.256663	0.212264	SCN1B/FXYD5/DLG4/TESC/DYSF/RASGRF1/STAC/CACNB1/CACNG4/CTSS/TMSB4X/TREM2/SHISA6	13	geneontology_Biological_Process	0.024952	Up
GO:0006749	GO:0006749	glutathione metabolic process	4/521	54/18866	0.0616408	0.256663	0.212264	GGCT/ETHE1/GGT6/GGT2	4	geneontology_Biological_Process	0.00767754	Up
GO:0007422	GO:0007422	peripheral nervous system development	5/521	77/18866	0.0617218	0.256663	0.212264	CLDN1/RUNX1/NAB2/PLXNA4/ERBB3	5	geneontology_Biological_Process	0.00959693	Up
GO:0030500	GO:0030500	regulation of bone mineralization	5/521	77/18866	0.0617218	0.256663	0.212264	TGFB1/KL/COMP/ECM1/ALOX5	5	geneontology_Biological_Process	0.00959693	Up
GO:0046902	GO:0046902	regulation of mitochondrial membrane permeability	5/521	77/18866	0.0617218	0.256663	0.212264	BBC3/E2F1/BID/SFN/PMAIP1	5	geneontology_Biological_Process	0.00959693	Up
GO:0048332	GO:0048332	mesoderm morphogenesis	5/521	77/18866	0.0617218	0.256663	0.212264	HMGA2/ITGA2/ITGA3/WNT3/ITGB4	5	geneontology_Biological_Process	0.00959693	Up
GO:0060411	GO:0060411	cardiac septum morphogenesis	5/521	77/18866	0.0617218	0.256663	0.212264	HEY2/NRP2/SOX4/TGFBR1/DHRS3	5	geneontology_Biological_Process	0.00959693	Up
GO:0002691	GO:0002691	regulation of cellular extravasation	3/521	33/18866	0.0620043	0.256663	0.212264	ABR/MDK/ICAM1	3	geneontology_Biological_Process	0.00575816	Up
GO:0035115	GO:0035115	embryonic forelimb morphogenesis	3/521	33/18866	0.0620043	0.256663	0.212264	WNT3/RUNX2/CRABP2	3	geneontology_Biological_Process	0.00575816	Up
GO:0042339	GO:0042339	keratan sulfate metabolic process	3/521	33/18866	0.0620043	0.256663	0.212264	B3GNT7/B3GNT3/CHST2	3	geneontology_Biological_Process	0.00575816	Up
GO:0042573	GO:0042573	retinoic acid metabolic process	3/521	33/18866	0.0620043	0.256663	0.212264	CYP2S1/ALDH1A3/CRABP2	3	geneontology_Biological_Process	0.00575816	Up
GO:0045736	GO:0045736	negative regulation of cyclin-dependent protein serine/threonine kinase activity	3/521	33/18866	0.0620043	0.256663	0.212264	CDKN2B/CDKN2A/CDKN1A	3	geneontology_Biological_Process	0.00575816	Up
GO:0048384	GO:0048384	retinoic acid receptor signaling pathway	3/521	33/18866	0.0620043	0.256663	0.212264	RXRG/DHRS3/CRABP2	3	geneontology_Biological_Process	0.00575816	Up
GO:0120255	GO:0120255	olefinic compound biosynthetic process	3/521	33/18866	0.0620043	0.256663	0.212264	ADM/ALOX15B/ALOX5	3	geneontology_Biological_Process	0.00575816	Up
GO:0046890	GO:0046890	regulation of lipid biosynthetic process	10/521	207/18866	0.0620203	0.256663	0.212264	THRSP/SREBF1/NR1D1/ADM/FGF1/ANXA1/MLXIPL/SCD/APOE/APOC1	10	geneontology_Biological_Process	0.0191939	Up
GO:0007187	GO:0007187	G protein-coupled receptor signaling pathway, coupled to cyclic nucleotide second messenger	12/521	263/18866	0.0620709	0.256663	0.212264	ADORA1/ADRA1B/HRH1/ADM/GPR4/SSTR3/ADCY8/PALM/GRM4/ANXA1/RAMP1/MARCO	12	geneontology_Biological_Process	0.0230326	Up
GO:0071774	GO:0071774	response to fibroblast growth factor	8/521	153/18866	0.0622039	0.256663	0.212264	FGF1/KL/CD44/APLN/RUNX2/TNC/POSTN/COL1A1	8	geneontology_Biological_Process	0.0153551	Up
GO:0002281	GO:0002281	macrophage activation involved in immune response	2/521	15/18866	0.0630451	0.256663	0.212264	DYSF/TREM2	2	geneontology_Biological_Process	0.00383877	Up
GO:0030852	GO:0030852	regulation of granulocyte differentiation	2/521	15/18866	0.0630451	0.256663	0.212264	RUNX1/TESC	2	geneontology_Biological_Process	0.00383877	Up
GO:0038065	GO:0038065	collagen-activated signaling pathway	2/521	15/18866	0.0630451	0.256663	0.212264	ITGA2/COL1A1	2	geneontology_Biological_Process	0.00383877	Up
GO:0042574	GO:0042574	retinal metabolic process	2/521	15/18866	0.0630451	0.256663	0.212264	ALDH1A3/CYP1B1	2	geneontology_Biological_Process	0.00383877	Up
GO:0043584	GO:0043584	nose development	2/521	15/18866	0.0630451	0.256663	0.212264	STRA6/ALDH1A3	2	geneontology_Biological_Process	0.00383877	Up
GO:0044406	GO:0044406	adhesion of symbiont to host	2/521	15/18866	0.0630451	0.256663	0.212264	ICAM1/INHBB	2	geneontology_Biological_Process	0.00383877	Up
GO:0044849	GO:0044849	estrous cycle	2/521	15/18866	0.0630451	0.256663	0.212264	MDK/MMP7	2	geneontology_Biological_Process	0.00383877	Up
GO:0060099	GO:0060099	regulation of phagocytosis, engulfment	2/521	15/18866	0.0630451	0.256663	0.212264	ITGA2/TREM2	2	geneontology_Biological_Process	0.00383877	Up
GO:0060391	GO:0060391	positive regulation of SMAD protein signal transduction	2/521	15/18866	0.0630451	0.256663	0.212264	TGFB1/TGFBR1	2	geneontology_Biological_Process	0.00383877	Up
GO:0070207	GO:0070207	protein homotrimerization	2/521	15/18866	0.0630451	0.256663	0.212264	SLC1A5/HLA-G	2	geneontology_Biological_Process	0.00383877	Up
GO:0070365	GO:0070365	hepatocyte differentiation	2/521	15/18866	0.0630451	0.256663	0.212264	ITGA2/ANXA1	2	geneontology_Biological_Process	0.00383877	Up
GO:0070831	GO:0070831	basement membrane assembly	2/521	15/18866	0.0630451	0.256663	0.212264	LAMB3/PXDN	2	geneontology_Biological_Process	0.00383877	Up
GO:1904889	GO:1904889	regulation of excitatory synapse assembly	2/521	15/18866	0.0630451	0.256663	0.212264	IL1RAP/CBLN1	2	geneontology_Biological_Process	0.00383877	Up
GO:2001028	GO:2001028	positive regulation of endothelial cell chemotaxis	2/521	15/18866	0.0630451	0.256663	0.212264	MET/TMSB4X	2	geneontology_Biological_Process	0.00383877	Up
GO:2001044	GO:2001044	regulation of integrin-mediated signaling pathway	2/521	15/18866	0.0630451	0.256663	0.212264	TIMP1/CD177	2	geneontology_Biological_Process	0.00383877	Up
GO:2001171	GO:2001171	positive regulation of ATP biosynthetic process	2/521	15/18866	0.0630451	0.256663	0.212264	TMSB4X/TREM2	2	geneontology_Biological_Process	0.00383877	Up
GO:0110020	GO:0110020	regulation of actomyosin structure organization	6/521	102/18866	0.0633651	0.25749	0.212949	FHOD1/NOX4/SDC4/MET/TGFBR1/TACSTD2	6	geneontology_Biological_Process	0.0115163	Up
GO:0150115	GO:0150115	cell-substrate junction organization	6/521	102/18866	0.0633651	0.25749	0.212949	FN1/LAMB3/SDC4/ITGA2/CD151/ITGB4	6	geneontology_Biological_Process	0.0115163	Up
GO:0030323	GO:0030323	respiratory tube development	9/521	181/18866	0.0643253	0.260671	0.21558	STRA6/AGR2/CTSH/SREBF1/ITGA3/FGF1/CHI3L1/FSTL3/TNC	9	geneontology_Biological_Process	0.0172745	Up
GO:0048736	GO:0048736	appendage development	9/521	181/18866	0.0643253	0.260671	0.21558	LRP4/ECE1/SOX4/WNT3/COMP/RUNX2/ITGB4/RSPO4/CRABP2	9	geneontology_Biological_Process	0.0172745	Up
GO:0060173	GO:0060173	limb development	9/521	181/18866	0.0643253	0.260671	0.21558	LRP4/ECE1/SOX4/WNT3/COMP/RUNX2/ITGB4/RSPO4/CRABP2	9	geneontology_Biological_Process	0.0172745	Up
GO:0000271	GO:0000271	polysaccharide biosynthetic process	5/521	78/18866	0.0645266	0.260768	0.21566	TGFB1/B3GNT7/B3GNT8/B3GNT3/NR1D1	5	geneontology_Biological_Process	0.00959693	Up
GO:0043900	GO:0043900	regulation of multi-organism process	5/521	78/18866	0.0645266	0.260768	0.21566	TIMP1/ARHGDIB/PDE5A/BNC1/INHBB	5	geneontology_Biological_Process	0.00959693	Up
GO:0060395	GO:0060395	SMAD protein signal transduction	5/521	78/18866	0.0645266	0.260768	0.21566	GDF15/TGFB1/CITED1/TGFBR1/INHBB	5	geneontology_Biological_Process	0.00959693	Up
GO:0003229	GO:0003229	ventricular cardiac muscle tissue development	4/521	55/18866	0.0650913	0.262569	0.217149	HEY2/TGFB1/ADAMTS9/TGFBR1	4	geneontology_Biological_Process	0.00767754	Up
GO:0071825	GO:0071825	protein-lipid complex subunit organization	4/521	55/18866	0.0650913	0.262569	0.217149	BMP1/LPL/APOE/APOC1	4	geneontology_Biological_Process	0.00767754	Up
GO:0001823	GO:0001823	mesonephros development	6/521	103/18866	0.0657974	0.264449	0.218704	CITED1/REN/SDC4/FGF1/TACSTD2/CRLF1	6	geneontology_Biological_Process	0.0115163	Up
GO:0060079	GO:0060079	excitatory postsynaptic potential	6/521	103/18866	0.0657974	0.264449	0.218704	ADORA1/LRRK2/DLG4/CELF4/GLRB/CBLN1	6	geneontology_Biological_Process	0.0115163	Up
GO:1901570	GO:1901570	fatty acid derivative biosynthetic process	6/521	103/18866	0.0657974	0.264449	0.218704	ALOX15B/GGT6/GGT2/ALOX5/ANXA1/SCD	6	geneontology_Biological_Process	0.0115163	Up
GO:1901890	GO:1901890	positive regulation of cell junction assembly	6/521	103/18866	0.0657974	0.264449	0.218704	EPHB3/CLDN1/SDC4/AMIGO2/IL1RAP/CBLN1	6	geneontology_Biological_Process	0.0115163	Up
GO:0030509	GO:0030509	BMP signaling pathway	8/521	155/18866	0.0660576	0.264771	0.21897	GDF15/TGFB1/TMPRSS6/ITGA3/COMP/RUNX2/FSTL3/TMEM100	8	geneontology_Biological_Process	0.0153551	Up
GO:0050773	GO:0050773	regulation of dendrite development	8/521	155/18866	0.0660576	0.264771	0.21897	SRCIN1/NGEF/LRRK2/TIAM1/LZTS1/TRPC5/SDK1/APOE	8	geneontology_Biological_Process	0.0153551	Up
GO:1904950	GO:1904950	negative regulation of establishment of protein localization	8/521	155/18866	0.0660576	0.264771	0.21897	SRCIN1/LRRK2/SREBF1/F2R/ADTRP/ANXA1/APOE/INHBB	8	geneontology_Biological_Process	0.0153551	Up
GO:0007616	GO:0007616	long-term memory	3/521	34/18866	0.0666654	0.265278	0.219389	RASGRF1/ADCY8/APOE	3	geneontology_Biological_Process	0.00575816	Up
GO:0016242	GO:0016242	negative regulation of macroautophagy	3/521	34/18866	0.0666654	0.265278	0.219389	LRRK2/LZTS1/QSOX1	3	geneontology_Biological_Process	0.00575816	Up
GO:0030431	GO:0030431	sleep	3/521	34/18866	0.0666654	0.265278	0.219389	ADORA1/CSF2/NMU	3	geneontology_Biological_Process	0.00575816	Up
GO:0030851	GO:0030851	granulocyte differentiation	3/521	34/18866	0.0666654	0.265278	0.219389	RUNX1/CSF2/TESC	3	geneontology_Biological_Process	0.00575816	Up
GO:0035774	GO:0035774	positive regulation of insulin secretion involved in cellular response to glucose stimulus	3/521	34/18866	0.0666654	0.265278	0.219389	BAIAP3/C1QTNF12/ADCY8	3	geneontology_Biological_Process	0.00575816	Up
GO:0043276	GO:0043276	anoikis	3/521	34/18866	0.0666654	0.265278	0.219389	E2F1/CEACAM6/DAPK2	3	geneontology_Biological_Process	0.00575816	Up
GO:0051482	GO:0051482	positive regulation of cytosolic calcium ion concentration involved in phospholipase C-activating G protein-coupled signaling pathway	3/521	34/18866	0.0666654	0.265278	0.219389	GPR4/F2R/TGM2	3	geneontology_Biological_Process	0.00575816	Up
GO:0055094	GO:0055094	response to lipoprotein particle	3/521	34/18866	0.0666654	0.265278	0.219389	LPL/ADTRP/APOE	3	geneontology_Biological_Process	0.00575816	Up
GO:0021675	GO:0021675	nerve development	5/521	79/18866	0.0674019	0.267725	0.221413	GABRB2/SEMA3F/NRP2/PLXNA4/ERBB3	5	geneontology_Biological_Process	0.00959693	Up
GO:0032272	GO:0032272	negative regulation of protein polymerization	5/521	79/18866	0.0674019	0.267725	0.221413	SPTBN2/EPS8/CLIP3/TMSB4X/STMN2	5	geneontology_Biological_Process	0.00959693	Up
GO:0009116	GO:0009116	nucleoside metabolic process	6/521	104/18866	0.0682835	0.270983	0.224107	CDA/LRRK2/UPP1/TK1/APOBEC3H/PNP	6	geneontology_Biological_Process	0.0115163	Up
GO:0001755	GO:0001755	neural crest cell migration	4/521	56/18866	0.0686405	0.271423	0.224471	SEMA6B/FN1/SEMA3F/NRP2	4	geneontology_Biological_Process	0.00767754	Up
GO:0031529	GO:0031529	ruffle organization	4/521	56/18866	0.0686405	0.271423	0.224471	EPS8/ICAM1/TACSTD2/CSPG4	4	geneontology_Biological_Process	0.00767754	Up
GO:0060563	GO:0060563	neuroepithelial cell differentiation	4/521	56/18866	0.0686405	0.271423	0.224471	JAG2/HEY2/SOX4/CDH2	4	geneontology_Biological_Process	0.00767754	Up
GO:0060688	GO:0060688	regulation of morphogenesis of a branching structure	4/521	56/18866	0.0686405	0.271423	0.224471	ETV5/LRRK2/MDK/TACSTD2	4	geneontology_Biological_Process	0.00767754	Up
GO:0006066	GO:0006066	alcohol metabolic process	16/521	385/18866	0.0694064	0.272396	0.225276	NPC2/PLCD3/ALDH3B1/HRH1/SREBF1/DYSF/ISYNA1/ALDH1A3/FGF1/RDH5/DHRS3/CYP1B1/PLPP2/SCD/APOE/APOC1	16	geneontology_Biological_Process	0.0307102	Up
GO:0009100	GO:0009100	glycoprotein metabolic process	17/521	415/18866	0.0695802	0.272396	0.225276	TUSC3/GALNT7/B3GNT7/B3GNT8/B3GNT3/ADAMTS9/ST8SIA4/B3GAT1/MUC21/ST3GAL5/MGAT3/ST6GALNAC5/CSPG4/SPOCK2/RAMP1/MUC1/HS6ST2	17	geneontology_Biological_Process	0.0326296	Up
GO:0003151	GO:0003151	outflow tract morphogenesis	5/521	80/18866	0.0703473	0.272396	0.225276	PLXND1/HEY2/RYR1/NRP2/DHRS3	5	geneontology_Biological_Process	0.00959693	Up
GO:0001977	GO:0001977	renal system process involved in regulation of blood volume	2/521	16/18866	0.0707703	0.272396	0.225276	ADORA1/F2R	2	geneontology_Biological_Process	0.00383877	Up
GO:0002070	GO:0002070	epithelial cell maturation	2/521	16/18866	0.0707703	0.272396	0.225276	TMEM79/CDKN1A	2	geneontology_Biological_Process	0.00383877	Up
GO:0003222	GO:0003222	ventricular trabecula myocardium morphogenesis	2/521	16/18866	0.0707703	0.272396	0.225276	HEY2/TGFBR1	2	geneontology_Biological_Process	0.00383877	Up
GO:0019372	GO:0019372	lipoxygenase pathway	2/521	16/18866	0.0707703	0.272396	0.225276	ALOX15B/ALOX5	2	geneontology_Biological_Process	0.00383877	Up
GO:0030214	GO:0030214	hyaluronan catabolic process	2/521	16/18866	0.0707703	0.272396	0.225276	TGFB1/CD44	2	geneontology_Biological_Process	0.00383877	Up
GO:0034116	GO:0034116	positive regulation of heterotypic cell-cell adhesion	2/521	16/18866	0.0707703	0.272396	0.225276	CD44/CEACAM6	2	geneontology_Biological_Process	0.00383877	Up
GO:0034380	GO:0034380	high-density lipoprotein particle assembly	2/521	16/18866	0.0707703	0.272396	0.225276	BMP1/APOE	2	geneontology_Biological_Process	0.00383877	Up
GO:0042035	GO:0042035	regulation of cytokine biosynthetic process	2/521	16/18866	0.0707703	0.272396	0.225276	IGF2BP2/INHBB	2	geneontology_Biological_Process	0.00383877	Up
GO:0042487	GO:0042487	regulation of odontogenesis of dentin-containing tooth	2/521	16/18866	0.0707703	0.272396	0.225276	RUNX2/WNT10A	2	geneontology_Biological_Process	0.00383877	Up
GO:0042994	GO:0042994	cytoplasmic sequestering of transcription factor	2/521	16/18866	0.0707703	0.272396	0.225276	MDFI/TMSB4X	2	geneontology_Biological_Process	0.00383877	Up
GO:0045869	GO:0045869	negative regulation of single stranded viral RNA replication via double stranded DNA intermediate	2/521	16/18866	0.0707703	0.272396	0.225276	HMGA2/APOBEC3H	2	geneontology_Biological_Process	0.00383877	Up
GO:0050774	GO:0050774	negative regulation of dendrite morphogenesis	2/521	16/18866	0.0707703	0.272396	0.225276	NGEF/TRPC5	2	geneontology_Biological_Process	0.00383877	Up
GO:0055119	GO:0055119	relaxation of cardiac muscle	2/521	16/18866	0.0707703	0.272396	0.225276	KCNJ2/PDE5A	2	geneontology_Biological_Process	0.00383877	Up
GO:0060413	GO:0060413	atrial septum morphogenesis	2/521	16/18866	0.0707703	0.272396	0.225276	HEY2/SOX4	2	geneontology_Biological_Process	0.00383877	Up
GO:0060576	GO:0060576	intestinal epithelial cell development	2/521	16/18866	0.0707703	0.272396	0.225276	PRDM1/CDKN1A	2	geneontology_Biological_Process	0.00383877	Up
GO:0061450	GO:0061450	trophoblast cell migration	2/521	16/18866	0.0707703	0.272396	0.225276	TIMP1/ARHGDIB	2	geneontology_Biological_Process	0.00383877	Up
GO:0061548	GO:0061548	ganglion development	2/521	16/18866	0.0707703	0.272396	0.225276	SEMA3F/NRP2	2	geneontology_Biological_Process	0.00383877	Up
GO:0097091	GO:0097091	synaptic vesicle clustering	2/521	16/18866	0.0707703	0.272396	0.225276	CDH2/SYN1	2	geneontology_Biological_Process	0.00383877	Up
GO:1901163	GO:1901163	regulation of trophoblast cell migration	2/521	16/18866	0.0707703	0.272396	0.225276	TIMP1/ARHGDIB	2	geneontology_Biological_Process	0.00383877	Up
GO:1902166	GO:1902166	negative regulation of intrinsic apoptotic signaling pathway in response to DNA damage by p53 class mediator	2/521	16/18866	0.0707703	0.272396	0.225276	CD44/MUC1	2	geneontology_Biological_Process	0.00383877	Up
GO:1903830	GO:1903830	magnesium ion transmembrane transport	2/521	16/18866	0.0707703	0.272396	0.225276	TUSC3/CLDN16	2	geneontology_Biological_Process	0.00383877	Up
GO:1904862	GO:1904862	inhibitory synapse assembly	2/521	16/18866	0.0707703	0.272396	0.225276	GABRB2/CBLN1	2	geneontology_Biological_Process	0.00383877	Up
GO:1905153	GO:1905153	regulation of membrane invagination	2/521	16/18866	0.0707703	0.272396	0.225276	ITGA2/TREM2	2	geneontology_Biological_Process	0.00383877	Up
GO:0045621	GO:0045621	positive regulation of lymphocyte differentiation	6/521	105/18866	0.0708235	0.272396	0.225276	RUNX1/MDK/SOX4/ANXA1/PNP/HLA-G	6	geneontology_Biological_Process	0.0115163	Up
GO:0062014	GO:0062014	negative regulation of small molecule metabolic process	6/521	105/18866	0.0708235	0.272396	0.225276	CDA/TGFB1/C1QTNF12/APOE/ERFE/APOC1	6	geneontology_Biological_Process	0.0115163	Up
GO:0031348	GO:0031348	negative regulation of defense response	12/521	269/18866	0.0708775	0.272396	0.225276	ABR/ADORA1/CX3CL1/TYRO3/NR1D1/MDK/FNDC4/C1QTNF12/CXCL17/ALOX5/APOE/HLA-G	12	geneontology_Biological_Process	0.0230326	Up
GO:0090596	GO:0090596	sensory organ morphogenesis	12/521	269/18866	0.0708775	0.272396	0.225276	ABR/GRHL3/FJX1/STRA6/ALDH1A3/PRDM1/COL8A1/MFAP2/SDK1/HPN/COL8A2/AQP5	12	geneontology_Biological_Process	0.0230326	Up
GO:0019218	GO:0019218	regulation of steroid metabolic process	7/521	131/18866	0.0712627	0.272396	0.225276	SREBF1/NR1D1/ADM/FGF1/SCD/APOE/APOC1	7	geneontology_Biological_Process	0.0134357	Up
GO:0000083	GO:0000083	regulation of transcription involved in G1/S transition of mitotic cell cycle	3/521	35/18866	0.0714815	0.272396	0.225276	E2F1/CDT1/CCNA1	3	geneontology_Biological_Process	0.00575816	Up
GO:0003203	GO:0003203	endocardial cushion morphogenesis	3/521	35/18866	0.0714815	0.272396	0.225276	HEY2/TGFBR1/TMEM100	3	geneontology_Biological_Process	0.00575816	Up
GO:0006691	GO:0006691	leukotriene metabolic process	3/521	35/18866	0.0714815	0.272396	0.225276	GGT6/GGT2/ALOX5	3	geneontology_Biological_Process	0.00575816	Up
GO:0007435	GO:0007435	salivary gland morphogenesis	3/521	35/18866	0.0714815	0.272396	0.225276	PLXND1/TGFB1/TGM2	3	geneontology_Biological_Process	0.00575816	Up
GO:0032735	GO:0032735	positive regulation of interleukin-12 production	3/521	35/18866	0.0714815	0.272396	0.225276	IRF5/MDK/HLA-G	3	geneontology_Biological_Process	0.00575816	Up
GO:0035909	GO:0035909	aorta morphogenesis	3/521	35/18866	0.0714815	0.272396	0.225276	HEY2/ADAMTS9/SOX4	3	geneontology_Biological_Process	0.00575816	Up
GO:0045066	GO:0045066	regulatory T cell differentiation	3/521	35/18866	0.0714815	0.272396	0.225276	RUNX1/MDK/HLA-G	3	geneontology_Biological_Process	0.00575816	Up
GO:0060251	GO:0060251	regulation of glial cell proliferation	3/521	35/18866	0.0714815	0.272396	0.225276	E2F1/ETV5/PLAG1	3	geneontology_Biological_Process	0.00575816	Up
GO:0060674	GO:0060674	placenta blood vessel development	3/521	35/18866	0.0714815	0.272396	0.225276	PLCD3/HEY2/SPINT1	3	geneontology_Biological_Process	0.00575816	Up
GO:0065005	GO:0065005	protein-lipid complex assembly	3/521	35/18866	0.0714815	0.272396	0.225276	BMP1/APOE/APOC1	3	geneontology_Biological_Process	0.00575816	Up
GO:0071312	GO:0071312	cellular response to alkaloid	3/521	35/18866	0.0714815	0.272396	0.225276	RYR1/ICAM1/ADCY8	3	geneontology_Biological_Process	0.00575816	Up
GO:0051251	GO:0051251	positive regulation of lymphocyte activation	15/521	357/18866	0.0715524	0.27243	0.225304	DPP4/TGFB1/RUNX1/MDK/SOX4/CDKN1A/IGFBP2/EBI3/LGALS1/CD55/ANXA1/PELI1/PNP/VTCN1/HLA-G	15	geneontology_Biological_Process	0.0287908	Up
GO:0097479	GO:0097479	synaptic vesicle localization	4/521	57/18866	0.0722876	0.274992	0.227423	LRRK2/RAB27A/CDH2/SYN1	4	geneontology_Biological_Process	0.00767754	Up
GO:0043242	GO:0043242	negative regulation of protein-containing complex disassembly	5/521	81/18866	0.0733626	0.277613	0.229591	SPTBN2/BMERB1/EPS8/TRIM54/STMN2	5	geneontology_Biological_Process	0.00959693	Up
GO:0006493	GO:0006493	protein O-linked glycosylation	6/521	106/18866	0.0734173	0.277613	0.229591	GALNT7/B3GNT7/B3GNT8/B3GNT3/MUC21/MUC1	6	geneontology_Biological_Process	0.0115163	Up
GO:0030038	GO:0030038	contractile actin filament bundle assembly	6/521	106/18866	0.0734173	0.277613	0.229591	FHOD1/NOX4/SDC4/MET/TGFBR1/TACSTD2	6	geneontology_Biological_Process	0.0115163	Up
GO:0032414	GO:0032414	positive regulation of ion transmembrane transporter activity	6/521	106/18866	0.0734173	0.277613	0.229591	TESC/STAC/CACNG4/CTSS/TMSB4X/TREM2	6	geneontology_Biological_Process	0.0115163	Up
GO:0032611	GO:0032611	interleukin-1 beta production	6/521	106/18866	0.0734173	0.277613	0.229591	CX3CL1/LPL/NOD1/F2R/INAVA/TREM2	6	geneontology_Biological_Process	0.0115163	Up
GO:0043149	GO:0043149	stress fiber assembly	6/521	106/18866	0.0734173	0.277613	0.229591	FHOD1/NOX4/SDC4/MET/TGFBR1/TACSTD2	6	geneontology_Biological_Process	0.0115163	Up
GO:2000379	GO:2000379	positive regulation of reactive oxygen species metabolic process	6/521	106/18866	0.0734173	0.277613	0.229591	TGFB1/NOX4/RAB27A/CDKN1A/ICAM1/CD177	6	geneontology_Biological_Process	0.0115163	Up
GO:0001666	GO:0001666	response to hypoxia	15/521	359/18866	0.0742382	0.280477	0.231959	PLEKHN1/E2F1/ADORA1/DPP4/RYR1/NOX4/LOXL2/ITGA2/ADM/PLAU/B3GAT1/ICAM1/VASN/POSTN/PMAIP1	15	geneontology_Biological_Process	0.0287908	Up
GO:0048639	GO:0048639	positive regulation of developmental growth	9/521	187/18866	0.0754846	0.284442	0.235238	HEY2/FN1/AGR2/TNFRSF12A/WNT3/CDH4/TRPC5/SYT1/CRABP2	9	geneontology_Biological_Process	0.0172745	Up
GO:0072175	GO:0072175	epithelial tube formation	7/521	133/18866	0.0759061	0.284442	0.235238	GRHL3/TGFB1/SPINT1/MTHFD1L/SDC4/ADM/SOX4	7	geneontology_Biological_Process	0.0134357	Up
GO:0000768	GO:0000768	syncytium formation by plasma membrane fusion	4/521	58/18866	0.0760315	0.284442	0.235238	GDF15/DCSTAMP/CD109/TREM2	4	geneontology_Biological_Process	0.00767754	Up
GO:0019369	GO:0019369	arachidonic acid metabolic process	4/521	58/18866	0.0760315	0.284442	0.235238	CYP2S1/ALOX15B/CYP1B1/ALOX5	4	geneontology_Biological_Process	0.00767754	Up
GO:0031638	GO:0031638	zymogen activation	4/521	58/18866	0.0760315	0.284442	0.235238	CTSH/PLAU/PERP/HPN	4	geneontology_Biological_Process	0.00767754	Up
GO:0140253	GO:0140253	cell-cell fusion	4/521	58/18866	0.0760315	0.284442	0.235238	GDF15/DCSTAMP/CD109/TREM2	4	geneontology_Biological_Process	0.00767754	Up
GO:0051963	GO:0051963	regulation of synapse assembly	6/521	107/18866	0.0760648	0.284442	0.235238	EPHB3/SLIT1/AMIGO2/IL1RAP/GAP43/CBLN1	6	geneontology_Biological_Process	0.0115163	Up
GO:2001237	GO:2001237	negative regulation of extrinsic apoptotic signaling pathway	6/521	107/18866	0.0760648	0.284442	0.235238	UNC5B/CSF2/CX3CL1/LGALS3/ICAM1/TGFBR1	6	geneontology_Biological_Process	0.0115163	Up
GO:1902930	GO:1902930	regulation of alcohol biosynthetic process	5/521	82/18866	0.0764474	0.284442	0.235238	HRH1/SREBF1/FGF1/SCD/APOE	5	geneontology_Biological_Process	0.00959693	Up
GO:0021955	GO:0021955	central nervous system neuron axonogenesis	3/521	36/18866	0.0764491	0.284442	0.235238	SCN1B/EPHB3/PLXNA4	3	geneontology_Biological_Process	0.00575816	Up
GO:0033280	GO:0033280	response to vitamin D	3/521	36/18866	0.0764491	0.284442	0.235238	ALPL/TNC/SPP1	3	geneontology_Biological_Process	0.00575816	Up
GO:0042554	GO:0042554	superoxide anion generation	3/521	36/18866	0.0764491	0.284442	0.235238	TGFB1/NOX4/CD177	3	geneontology_Biological_Process	0.00575816	Up
GO:0050931	GO:0050931	pigment cell differentiation	3/521	36/18866	0.0764491	0.284442	0.235238	CITED1/ADAMTS9/RAB27A	3	geneontology_Biological_Process	0.00575816	Up
GO:0060323	GO:0060323	head morphogenesis	3/521	36/18866	0.0764491	0.284442	0.235238	STRA6/WNT3/COL1A1	3	geneontology_Biological_Process	0.00575816	Up
GO:0071402	GO:0071402	cellular response to lipoprotein particle stimulus	3/521	36/18866	0.0764491	0.284442	0.235238	LPL/ADTRP/APOE	3	geneontology_Biological_Process	0.00575816	Up
GO:1901099	GO:1901099	negative regulation of signal transduction in absence of ligand	3/521	36/18866	0.0764491	0.284442	0.235238	UNC5B/CSF2/CX3CL1	3	geneontology_Biological_Process	0.00575816	Up
GO:1901385	GO:1901385	regulation of voltage-gated calcium channel activity	3/521	36/18866	0.0764491	0.284442	0.235238	DYSF/STAC/CACNB1	3	geneontology_Biological_Process	0.00575816	Up
GO:2001240	GO:2001240	negative regulation of extrinsic apoptotic signaling pathway in absence of ligand	3/521	36/18866	0.0764491	0.284442	0.235238	UNC5B/CSF2/CX3CL1	3	geneontology_Biological_Process	0.00575816	Up
GO:0051651	GO:0051651	maintenance of location in cell	10/521	216/18866	0.07749	0.287547	0.237806	RYR1/CX3CL1/KDELR3/LCN2/F2R/APLNR/TMSB4X/APOE/SLC30A2/SLC30A3	10	geneontology_Biological_Process	0.0191939	Up
GO:0043280	GO:0043280	positive regulation of cysteine-type endopeptidase activity involved in apoptotic process	7/521	134/18866	0.0782928	0.287547	0.237806	BBC3/BID/CTSH/NOD1/TNFSF15/F2R/PMAIP1	7	geneontology_Biological_Process	0.0134357	Up
GO:0031570	GO:0031570	DNA integrity checkpoint	8/521	161/18866	0.0784875	0.287547	0.237806	E2F1/HMGA2/CDT1/CCND1/SOX4/SFN/CDKN1A/MUC1	8	geneontology_Biological_Process	0.0153551	Up
GO:0042593	GO:0042593	glucose homeostasis	11/521	245/18866	0.0785087	0.287547	0.237806	TIAM1/NOX4/BAIAP3/NR1D1/SOX4/C1QTNF12/ICAM1/ADCY8/LGALS1/ALOX5/MLXIPL	11	geneontology_Biological_Process	0.0211132	Up
GO:0007229	GO:0007229	integrin-mediated signaling pathway	6/521	108/18866	0.0787658	0.287547	0.237806	FN1/TIMP1/ITGA2/ITGA3/ITGB4/CD177	6	geneontology_Biological_Process	0.0115163	Up
GO:0002031	GO:0002031	G protein-coupled receptor internalization	2/521	17/18866	0.0787836	0.287547	0.237806	ADM/APLN	2	geneontology_Biological_Process	0.00383877	Up
GO:0003184	GO:0003184	pulmonary valve morphogenesis	2/521	17/18866	0.0787836	0.287547	0.237806	HEY2/STRA6	2	geneontology_Biological_Process	0.00383877	Up
GO:0006750	GO:0006750	glutathione biosynthetic process	2/521	17/18866	0.0787836	0.287547	0.237806	GGCT/GGT6	2	geneontology_Biological_Process	0.00383877	Up
GO:0006978	GO:0006978	DNA damage response, signal transduction by p53 class mediator resulting in transcription of p21 class mediator	2/521	17/18866	0.0787836	0.287547	0.237806	CDKN1A/MUC1	2	geneontology_Biological_Process	0.00383877	Up
GO:0007250	GO:0007250	activation of NF-kappaB-inducing kinase activity	2/521	17/18866	0.0787836	0.287547	0.237806	CHI3L1/TNFSF15	2	geneontology_Biological_Process	0.00383877	Up
GO:0010224	GO:0010224	response to UV-B	2/521	17/18866	0.0787836	0.287547	0.237806	CDKN1A/IVL	2	geneontology_Biological_Process	0.00383877	Up
GO:0010715	GO:0010715	regulation of extracellular matrix disassembly	2/521	17/18866	0.0787836	0.287547	0.237806	DPP4/TGFB1	2	geneontology_Biological_Process	0.00383877	Up
GO:0030033	GO:0030033	microvillus assembly	2/521	17/18866	0.0787836	0.287547	0.237806	FXYD5/ESPN	2	geneontology_Biological_Process	0.00383877	Up
GO:0030540	GO:0030540	female genitalia development	2/521	17/18866	0.0787836	0.287547	0.237806	STRA6/TYRO3	2	geneontology_Biological_Process	0.00383877	Up
GO:0031065	GO:0031065	positive regulation of histone deacetylation	2/521	17/18866	0.0787836	0.287547	0.237806	LRRK2/SREBF1	2	geneontology_Biological_Process	0.00383877	Up
GO:0031649	GO:0031649	heat generation	2/521	17/18866	0.0787836	0.287547	0.237806	NMU/APLN	2	geneontology_Biological_Process	0.00383877	Up
GO:0046068	GO:0046068	cGMP metabolic process	2/521	17/18866	0.0787836	0.287547	0.237806	PDE9A/PDE5A	2	geneontology_Biological_Process	0.00383877	Up
GO:0048385	GO:0048385	regulation of retinoic acid receptor signaling pathway	2/521	17/18866	0.0787836	0.287547	0.237806	DHRS3/CRABP2	2	geneontology_Biological_Process	0.00383877	Up
GO:0070206	GO:0070206	protein trimerization	2/521	17/18866	0.0787836	0.287547	0.237806	SLC1A5/HLA-G	2	geneontology_Biological_Process	0.00383877	Up
GO:0090185	GO:0090185	negative regulation of kidney development	2/521	17/18866	0.0787836	0.287547	0.237806	CITED1/TACSTD2	2	geneontology_Biological_Process	0.00383877	Up
GO:0097067	GO:0097067	cellular response to thyroid hormone stimulus	2/521	17/18866	0.0787836	0.287547	0.237806	CTSH/CTSS	2	geneontology_Biological_Process	0.00383877	Up
GO:0099558	GO:0099558	maintenance of synapse structure	2/521	17/18866	0.0787836	0.287547	0.237806	C1QL1/CBLN1	2	geneontology_Biological_Process	0.00383877	Up
GO:1905331	GO:1905331	negative regulation of morphogenesis of an epithelium	2/521	17/18866	0.0787836	0.287547	0.237806	CITED1/TACSTD2	2	geneontology_Biological_Process	0.00383877	Up
GO:0071277	GO:0071277	cellular response to calcium ion	5/521	83/18866	0.0796013	0.290051	0.239877	RYR1/SYT12/ADCY8/CPNE4/SYT1	5	geneontology_Biological_Process	0.00959693	Up
GO:2001021	GO:2001021	negative regulation of response to DNA damage stimulus	5/521	83/18866	0.0796013	0.290051	0.239877	HMGA2/BID/RMI2/CD44/MUC1	5	geneontology_Biological_Process	0.00959693	Up
GO:0042326	GO:0042326	negative regulation of phosphorylation	19/521	484/18866	0.0797585	0.290075	0.239897	SRCIN1/CDKN2B/DUSP4/TGFB1/LRRK2/CAMK2N2/DUSP6/MVP/CAMK2N1/PPP1R1B/TESC/CDKN2A/SFN/CDKN1A/DUSP5/LMO3/CD109/MLXIPL/APOE	19	geneontology_Biological_Process	0.0364683	Up
GO:0006636	GO:0006636	unsaturated fatty acid biosynthetic process	4/521	59/18866	0.079871	0.290075	0.239897	ALOX15B/ALOX5/ANXA1/SCD	4	geneontology_Biological_Process	0.00767754	Up
GO:0031102	GO:0031102	neuron projection regeneration	4/521	59/18866	0.079871	0.290075	0.239897	ADM/GAP43/TNC/SPP1	4	geneontology_Biological_Process	0.00767754	Up
GO:0060113	GO:0060113	inner ear receptor cell differentiation	4/521	59/18866	0.079871	0.290075	0.239897	GABRB2/JAG2/HEY2/SDC4	4	geneontology_Biological_Process	0.00767754	Up
GO:0033500	GO:0033500	carbohydrate homeostasis	11/521	246/18866	0.0802569	0.291237	0.240858	TIAM1/NOX4/BAIAP3/NR1D1/SOX4/C1QTNF12/ICAM1/ADCY8/LGALS1/ALOX5/MLXIPL	11	geneontology_Biological_Process	0.0211132	Up
GO:1903305	GO:1903305	regulation of regulated secretory pathway	8/521	162/18866	0.0806861	0.292446	0.241858	ABR/LRRK2/SYT12/BAIAP3/RAB27A/SYN1/SYT1/CD177	8	geneontology_Biological_Process	0.0153551	Up
GO:0003158	GO:0003158	endothelium development	7/521	135/18866	0.0807229	0.292446	0.241858	HEY2/CLDN1/MET/GJA4/FGF1/ICAM1/TMEM100	7	geneontology_Biological_Process	0.0134357	Up
GO:0006575	GO:0006575	cellular modified amino acid metabolic process	9/521	190/18866	0.0814836	0.293804	0.242981	SERINC2/GGCT/MTHFD1L/FOLH1/ETHE1/GGT6/CARNS1/GGT2/HPN	9	geneontology_Biological_Process	0.0172745	Up
GO:0033363	GO:0033363	secretory granule organization	3/521	37/18866	0.0815641	0.293804	0.242981	BAIAP3/SPINK2/F2R	3	geneontology_Biological_Process	0.00575816	Up
GO:0048048	GO:0048048	embryonic eye morphogenesis	3/521	37/18866	0.0815641	0.293804	0.242981	STRA6/ALDH1A3/MFAP2	3	geneontology_Biological_Process	0.00575816	Up
GO:0086010	GO:0086010	membrane depolarization during action potential	3/521	37/18866	0.0815641	0.293804	0.242981	SCN1B/HCN4/KCNJ2	3	geneontology_Biological_Process	0.00575816	Up
GO:1904994	GO:1904994	regulation of leukocyte adhesion to vascular endothelial cell	3/521	37/18866	0.0815641	0.293804	0.242981	MDK/ICAM1/ALOX5	3	geneontology_Biological_Process	0.00575816	Up
GO:1905314	GO:1905314	semi-lunar valve development	3/521	37/18866	0.0815641	0.293804	0.242981	HEY2/TGFB1/STRA6	3	geneontology_Biological_Process	0.00575816	Up
GO:2000273	GO:2000273	positive regulation of signaling receptor activity	3/521	37/18866	0.0815641	0.293804	0.242981	ADORA1/TGFA/CACNG4	3	geneontology_Biological_Process	0.00575816	Up
GO:0016358	GO:0016358	dendrite development	11/521	247/18866	0.0820293	0.295238	0.244167	SRCIN1/LRP4/NGEF/EPHB3/LRRK2/TIAM1/DLG4/LZTS1/TRPC5/SDK1/APOE	11	geneontology_Biological_Process	0.0211132	Up
GO:2000146	GO:2000146	negative regulation of cell motility	15/521	365/18866	0.0826903	0.297375	0.245934	ABR/ADORA1/DPP4/TGFB1/BMERB1/CX3CL1/TIMP1/ADAMTS9/ARHGDIB/ALOX15B/TACSTD2/FRMD5/CYP1B1/ADTRP/APOE	15	geneontology_Biological_Process	0.0287908	Up
GO:0014031	GO:0014031	mesenchymal cell development	5/521	84/18866	0.0828239	0.297477	0.246018	HEY2/SEMA6B/FN1/SEMA3F/NRP2	5	geneontology_Biological_Process	0.00959693	Up
GO:0009267	GO:0009267	cellular response to starvation	8/521	163/18866	0.082921	0.297477	0.246018	LRRK2/UPP1/XPR1/SREBF1/CDKN1A/AOC1/PMAIP1/INHBB	8	geneontology_Biological_Process	0.0153551	Up
GO:0055088	GO:0055088	lipid homeostasis	8/521	163/18866	0.082921	0.297477	0.246018	NPC2/ADORA1/LPL/NR1D1/PLA2G12B/PNPLA5/MLXIPL/APOE	8	geneontology_Biological_Process	0.0153551	Up
GO:0062012	GO:0062012	regulation of small molecule metabolic process	18/521	456/18866	0.0830213	0.297516	0.246051	CDA/TGFB1/HRH1/SREBF1/NR1D1/ADM/PHLDA2/FGF1/C1QTNF12/TMSB4X/TREM2/ANXA1/MLXIPL/SCD/APOE/ERFE/PMAIP1/APOC1	18	geneontology_Biological_Process	0.0345489	Up
GO:0000075	GO:0000075	cell cycle checkpoint	10/521	219/18866	0.0831344	0.297516	0.246051	E2F1/HMGA2/CDKN2B/CDT1/TGFB1/CCND1/SOX4/SFN/CDKN1A/MUC1	10	geneontology_Biological_Process	0.0191939	Up
GO:0030178	GO:0030178	negative regulation of Wnt signaling pathway	10/521	219/18866	0.0831344	0.297516	0.246051	LRP4/CITED1/DRAXIN/MDK/MDFI/CDH2/IGFBP2/SHISA6/APOE/IGFBP6	10	geneontology_Biological_Process	0.0191939	Up
GO:0006816	GO:0006816	calcium ion transport	17/521	426/18866	0.0836343	0.299062	0.247329	RYR1/CX3CL1/UCN/DYSF/GJA4/CATSPER1/LGALS3/CRACR2B/KCNN4/ICAM1/STAC/TRPC5/CACNB1/F2R/CACNG4/APLNR/RAMP1	17	geneontology_Biological_Process	0.0326296	Up
GO:0006949	GO:0006949	syncytium formation	4/521	60/18866	0.0838051	0.29943	0.247633	GDF15/DCSTAMP/CD109/TREM2	4	geneontology_Biological_Process	0.00767754	Up
GO:0021953	GO:0021953	central nervous system neuron differentiation	9/521	192/18866	0.0856387	0.304411	0.251753	SCN1B/EPHB3/DRAXIN/NRP2/SOX4/WNT3/CBLN1/SPOCK1/PLXNA4	9	geneontology_Biological_Process	0.0172745	Up
GO:0010507	GO:0010507	negative regulation of autophagy	5/521	85/18866	0.0861146	0.304411	0.251753	LRRK2/MET/LZTS1/QSOX1/TREM2	5	geneontology_Biological_Process	0.00959693	Up
GO:0031110	GO:0031110	regulation of microtubule polymerization or depolymerization	5/521	85/18866	0.0861146	0.304411	0.251753	BMERB1/MET/TRIM54/CLIP3/STMN2	5	geneontology_Biological_Process	0.00959693	Up
GO:0019433	GO:0019433	triglyceride catabolic process	3/521	38/18866	0.0868227	0.304411	0.251753	LIPH/LPL/PNPLA5	3	geneontology_Biological_Process	0.00575816	Up
GO:0045777	GO:0045777	positive regulation of blood pressure	3/521	38/18866	0.0868227	0.304411	0.251753	ADORA1/ADRA1B/NMU	3	geneontology_Biological_Process	0.00575816	Up
GO:0048009	GO:0048009	insulin-like growth factor receptor signaling pathway	3/521	38/18866	0.0868227	0.304411	0.251753	CDH3/IGFBP2/IGFBP6	3	geneontology_Biological_Process	0.00575816	Up
GO:1905898	GO:1905898	positive regulation of response to endoplasmic reticulum stress	3/521	38/18866	0.0868227	0.304411	0.251753	AGR2/RNF183/PMAIP1	3	geneontology_Biological_Process	0.00575816	Up
GO:0071241	GO:0071241	cellular response to inorganic substance	10/521	221/18866	0.0870336	0.304411	0.251753	LRRK2/RYR1/CLDN1/DLG4/SYT12/ADCY8/FSTL3/CPNE4/SYT1/AOC1	10	geneontology_Biological_Process	0.0191939	Up
GO:0010839	GO:0010839	negative regulation of keratinocyte proliferation	2/521	18/18866	0.0870634	0.304411	0.251753	SFN/CD109	2	geneontology_Biological_Process	0.00383877	Up
GO:0021756	GO:0021756	striatum development	2/521	18/18866	0.0870634	0.304411	0.251753	LRRK2/ALDH1A3	2	geneontology_Biological_Process	0.00383877	Up
GO:0032656	GO:0032656	regulation of interleukin-13 production	2/521	18/18866	0.0870634	0.304411	0.251753	IL1RAP/TNFRSF21	2	geneontology_Biological_Process	0.00383877	Up
GO:0034199	GO:0034199	activation of protein kinase A activity	2/521	18/18866	0.0870634	0.304411	0.251753	UCN/ADCY8	2	geneontology_Biological_Process	0.00383877	Up
GO:0034375	GO:0034375	high-density lipoprotein particle remodeling	2/521	18/18866	0.0870634	0.304411	0.251753	APOE/APOC1	2	geneontology_Biological_Process	0.00383877	Up
GO:0034433	GO:0034433	steroid esterification	2/521	18/18866	0.0870634	0.304411	0.251753	APOE/APOC1	2	geneontology_Biological_Process	0.00383877	Up
GO:0034434	GO:0034434	sterol esterification	2/521	18/18866	0.0870634	0.304411	0.251753	APOE/APOC1	2	geneontology_Biological_Process	0.00383877	Up
GO:0034435	GO:0034435	cholesterol esterification	2/521	18/18866	0.0870634	0.304411	0.251753	APOE/APOC1	2	geneontology_Biological_Process	0.00383877	Up
GO:0042772	GO:0042772	DNA damage response, signal transduction resulting in transcription	2/521	18/18866	0.0870634	0.304411	0.251753	CDKN1A/MUC1	2	geneontology_Biological_Process	0.00383877	Up
GO:0043011	GO:0043011	myeloid dendritic cell differentiation	2/521	18/18866	0.0870634	0.304411	0.251753	CSF2/DCSTAMP	2	geneontology_Biological_Process	0.00383877	Up
GO:0043031	GO:0043031	negative regulation of macrophage activation	2/521	18/18866	0.0870634	0.304411	0.251753	CX3CL1/NR1D1	2	geneontology_Biological_Process	0.00383877	Up
GO:0045721	GO:0045721	negative regulation of gluconeogenesis	2/521	18/18866	0.0870634	0.304411	0.251753	C1QTNF12/ERFE	2	geneontology_Biological_Process	0.00383877	Up
GO:0060192	GO:0060192	negative regulation of lipase activity	2/521	18/18866	0.0870634	0.304411	0.251753	ANXA1/APOC1	2	geneontology_Biological_Process	0.00383877	Up
GO:0060457	GO:0060457	negative regulation of digestive system process	2/521	18/18866	0.0870634	0.304411	0.251753	UCN/NMU	2	geneontology_Biological_Process	0.00383877	Up
GO:0060977	GO:0060977	coronary vasculature morphogenesis	2/521	18/18866	0.0870634	0.304411	0.251753	HEY2/TGFBR1	2	geneontology_Biological_Process	0.00383877	Up
GO:0097107	GO:0097107	postsynaptic density assembly	2/521	18/18866	0.0870634	0.304411	0.251753	IL1RAP/CBLN1	2	geneontology_Biological_Process	0.00383877	Up
GO:1900221	GO:1900221	regulation of amyloid-beta clearance	2/521	18/18866	0.0870634	0.304411	0.251753	TREM2/APOE	2	geneontology_Biological_Process	0.00383877	Up
GO:1902165	GO:1902165	regulation of intrinsic apoptotic signaling pathway in response to DNA damage by p53 class mediator	2/521	18/18866	0.0870634	0.304411	0.251753	CD44/MUC1	2	geneontology_Biological_Process	0.00383877	Up
GO:2000831	GO:2000831	regulation of steroid hormone secretion	2/521	18/18866	0.0870634	0.304411	0.251753	REN/RETN	2	geneontology_Biological_Process	0.00383877	Up
GO:0002526	GO:0002526	acute inflammatory response	6/521	111/18866	0.0871882	0.304606	0.251914	ADORA1/FN1/SERPINA1/ICAM1/TREM1/C2CD4A	6	geneontology_Biological_Process	0.0115163	Up
GO:0046888	GO:0046888	negative regulation of hormone secretion	4/521	61/18866	0.0878323	0.306371	0.253374	ADORA1/SREBF1/UCN/INHBB	4	geneontology_Biological_Process	0.00767754	Up
GO:0090342	GO:0090342	regulation of cell aging	4/521	61/18866	0.0878323	0.306371	0.253374	HMGA2/CDKN2A/ARNTL/HLA-G	4	geneontology_Biological_Process	0.00767754	Up
GO:0006638	GO:0006638	neutral lipid metabolic process	7/521	138/18866	0.0882722	0.307176	0.25404	LIPH/THRSP/SREBF1/LPL/PNPLA5/APOE/APOC1	7	geneontology_Biological_Process	0.0134357	Up
GO:0006639	GO:0006639	acylglycerol metabolic process	7/521	138/18866	0.0882722	0.307176	0.25404	LIPH/THRSP/SREBF1/LPL/PNPLA5/APOE/APOC1	7	geneontology_Biological_Process	0.0134357	Up
GO:0046330	GO:0046330	positive regulation of JNK cascade	7/521	138/18866	0.0882722	0.307176	0.25404	MAP3K6/TIAM1/TPD52L1/UNC5CL/EDA2R/NOD1/BIRC7	7	geneontology_Biological_Process	0.0134357	Up
GO:0017157	GO:0017157	regulation of exocytosis	10/521	222/18866	0.0890241	0.309548	0.256002	ABR/LRRK2/SDC4/SYT12/BAIAP3/RAB27A/SYN1/ANXA1/SYT1/CD177	10	geneontology_Biological_Process	0.0191939	Up
GO:0007193	GO:0007193	adenylate cyclase-inhibiting G protein-coupled receptor signaling pathway	5/521	86/18866	0.0894729	0.310375	0.256685	ADORA1/ADCY8/PALM/GRM4/MARCO	5	geneontology_Biological_Process	0.00959693	Up
GO:0034109	GO:0034109	homotypic cell-cell adhesion	5/521	86/18866	0.0894729	0.310375	0.256685	FN1/TYRO3/COMP/LGALS1/PLAUR	5	geneontology_Biological_Process	0.00959693	Up
GO:0034637	GO:0034637	cellular carbohydrate biosynthetic process	5/521	86/18866	0.0894729	0.310375	0.256685	B3GNT7/B3GNT8/B3GNT3/NR1D1/ISYNA1	5	geneontology_Biological_Process	0.00959693	Up
GO:0046578	GO:0046578	regulation of Ras protein signal transduction	9/521	194/18866	0.0899182	0.311674	0.25776	EPS8/MET/PSD3/ITGA3/ARHGDIB/GPR4/RASGRF1/F2R/APOE	9	geneontology_Biological_Process	0.0172745	Up
GO:0005976	GO:0005976	polysaccharide metabolic process	6/521	112/18866	0.0901013	0.311818	0.257879	TGFB1/B3GNT7/B3GNT8/B3GNT3/NR1D1/PHLDA2	6	geneontology_Biological_Process	0.0115163	Up
GO:0099565	GO:0099565	chemical synaptic transmission, postsynaptic	6/521	112/18866	0.0901013	0.311818	0.257879	ADORA1/LRRK2/DLG4/CELF4/GLRB/CBLN1	6	geneontology_Biological_Process	0.0115163	Up
GO:1904951	GO:1904951	positive regulation of establishment of protein localization	15/521	370/18866	0.0901897	0.31188	0.25793	PTP4A3/BBC3/E2F1/BID/TENM1/TGFB1/BAIAP3/SOX4/KCNN4/C1QTNF12/NMU/SFN/ADCY8/TREM2/PMAIP1	15	geneontology_Biological_Process	0.0287908	Up
GO:0036293	GO:0036293	response to decreased oxygen levels	15/521	371/18866	0.0917396	0.316421	0.261685	PLEKHN1/E2F1/ADORA1/DPP4/RYR1/NOX4/LOXL2/ITGA2/ADM/PLAU/B3GAT1/ICAM1/VASN/POSTN/PMAIP1	15	geneontology_Biological_Process	0.0287908	Up
GO:0060393	GO:0060393	regulation of pathway-restricted SMAD protein phosphorylation	4/521	62/18866	0.0919514	0.316421	0.261685	GDF15/TGFB1/TGFBR1/INHBB	4	geneontology_Biological_Process	0.00767754	Up
GO:2001244	GO:2001244	positive regulation of intrinsic apoptotic signaling pathway	4/521	62/18866	0.0919514	0.316421	0.261685	BBC3/BID/RNF183/PMAIP1	4	geneontology_Biological_Process	0.00767754	Up
GO:0007431	GO:0007431	salivary gland development	3/521	39/18866	0.0922207	0.316421	0.261685	PLXND1/TGFB1/TGM2	3	geneontology_Biological_Process	0.00575816	Up
GO:0009163	GO:0009163	nucleoside biosynthetic process	3/521	39/18866	0.0922207	0.316421	0.261685	CDA/UPP1/TK1	3	geneontology_Biological_Process	0.00575816	Up
GO:0016601	GO:0016601	Rac protein signal transduction	3/521	39/18866	0.0922207	0.316421	0.261685	TIAM1/EPS8/RASGRF1	3	geneontology_Biological_Process	0.00575816	Up
GO:0035886	GO:0035886	vascular associated smooth muscle cell differentiation	3/521	39/18866	0.0922207	0.316421	0.261685	HEY2/ADM/COMP	3	geneontology_Biological_Process	0.00575816	Up
GO:0072529	GO:0072529	pyrimidine-containing compound catabolic process	3/521	39/18866	0.0922207	0.316421	0.261685	CDA/UPP1/APOBEC3H	3	geneontology_Biological_Process	0.00575816	Up
GO:0086091	GO:0086091	regulation of heart rate by cardiac conduction	3/521	39/18866	0.0922207	0.316421	0.261685	SCN1B/HCN4/KCNJ2	3	geneontology_Biological_Process	0.00575816	Up
GO:1902229	GO:1902229	regulation of intrinsic apoptotic signaling pathway in response to DNA damage	3/521	39/18866	0.0922207	0.316421	0.261685	BID/CD44/MUC1	3	geneontology_Biological_Process	0.00575816	Up
GO:0030512	GO:0030512	negative regulation of transforming growth factor beta receptor signaling pathway	5/521	87/18866	0.0928984	0.318155	0.263119	TGFB1/IL17RD/TGFBR1/VASN/CD109	5	geneontology_Biological_Process	0.00959693	Up
GO:0051262	GO:0051262	protein tetramerization	5/521	87/18866	0.0928984	0.318155	0.263119	RYR1/KCNJ2/TK1/ALDH1A3/AQP5	5	geneontology_Biological_Process	0.00959693	Up
GO:0001676	GO:0001676	long-chain fatty acid metabolic process	6/521	113/18866	0.0930668	0.318155	0.263119	CYP2S1/ALOX15B/CYP1B1/ALOX5/ADTRP/SLC27A6	6	geneontology_Biological_Process	0.0115163	Up
GO:0035821	GO:0035821	modulation of process of other organism	6/521	113/18866	0.0930668	0.318155	0.263119	HMGA2/PC/POU2F3/APOE/HPN/SLPI	6	geneontology_Biological_Process	0.0115163	Up
GO:0019935	GO:0019935	cyclic-nucleotide-mediated signaling	10/521	224/18866	0.0930868	0.318155	0.263119	RASD2/ADRA1B/PDE9A/UCN/ADM/GPR4/ADCY8/APLNR/APOE/RAMP1	10	geneontology_Biological_Process	0.0191939	Up
GO:0060048	GO:0060048	cardiac muscle contraction	7/521	140/18866	0.0935198	0.31914	0.263934	SCN1B/ADORA1/ADRA1B/HCN4/KCNJ2/UCN/PDE5A	7	geneontology_Biological_Process	0.0134357	Up
GO:0072655	GO:0072655	establishment of protein localization to mitochondrion	7/521	140/18866	0.0935198	0.31914	0.263934	BBC3/E2F1/BID/LRRK2/SREBF1/SFN/PMAIP1	7	geneontology_Biological_Process	0.0134357	Up
GO:2000027	GO:2000027	regulation of animal organ morphogenesis	11/521	254/18866	0.0951138	0.321718	0.266066	GRHL3/ETV5/TIAM1/CITED1/MDK/FGF1/TGFBR1/TACSTD2/RUNX2/WNT10A/HPN	11	geneontology_Biological_Process	0.0211132	Up
GO:0001696	GO:0001696	gastric acid secretion	2/521	19/18866	0.0955888	0.321718	0.266066	UCN/NMU	2	geneontology_Biological_Process	0.00383877	Up
GO:0001991	GO:0001991	regulation of systemic arterial blood pressure by circulatory renin-angiotensin	2/521	19/18866	0.0955888	0.321718	0.266066	REN/F2R	2	geneontology_Biological_Process	0.00383877	Up
GO:0006044	GO:0006044	N-acetylglucosamine metabolic process	2/521	19/18866	0.0955888	0.321718	0.266066	CHST2/MGAT3	2	geneontology_Biological_Process	0.00383877	Up
GO:0007625	GO:0007625	grooming behavior	2/521	19/18866	0.0955888	0.321718	0.266066	DLG4/NMU	2	geneontology_Biological_Process	0.00383877	Up
GO:0010759	GO:0010759	positive regulation of macrophage chemotaxis	2/521	19/18866	0.0955888	0.321718	0.266066	MDK/CXCL17	2	geneontology_Biological_Process	0.00383877	Up
GO:0019184	GO:0019184	nonribosomal peptide biosynthetic process	2/521	19/18866	0.0955888	0.321718	0.266066	GGCT/GGT6	2	geneontology_Biological_Process	0.00383877	Up
GO:0032930	GO:0032930	positive regulation of superoxide anion generation	2/521	19/18866	0.0955888	0.321718	0.266066	TGFB1/CD177	2	geneontology_Biological_Process	0.00383877	Up
GO:0044320	GO:0044320	cellular response to leptin stimulus	2/521	19/18866	0.0955888	0.321718	0.266066	EBI3/INHBB	2	geneontology_Biological_Process	0.00383877	Up
GO:0045091	GO:0045091	regulation of single stranded viral RNA replication via double stranded DNA intermediate	2/521	19/18866	0.0955888	0.321718	0.266066	HMGA2/APOBEC3H	2	geneontology_Biological_Process	0.00383877	Up
GO:0045780	GO:0045780	positive regulation of bone resorption	2/521	19/18866	0.0955888	0.321718	0.266066	DCSTAMP/SPP1	2	geneontology_Biological_Process	0.00383877	Up
GO:0046629	GO:0046629	gamma-delta T cell activation	2/521	19/18866	0.0955888	0.321718	0.266066	JAG2/SOX4	2	geneontology_Biological_Process	0.00383877	Up
GO:0046852	GO:0046852	positive regulation of bone remodeling	2/521	19/18866	0.0955888	0.321718	0.266066	DCSTAMP/SPP1	2	geneontology_Biological_Process	0.00383877	Up
GO:0060602	GO:0060602	branch elongation of an epithelium	2/521	19/18866	0.0955888	0.321718	0.266066	FGF1/TNC	2	geneontology_Biological_Process	0.00383877	Up
GO:0061081	GO:0061081	positive regulation of myeloid leukocyte cytokine production involved in immune response	2/521	19/18866	0.0955888	0.321718	0.266066	GPRC5B/HLA-G	2	geneontology_Biological_Process	0.00383877	Up
GO:0071625	GO:0071625	vocalization behavior	2/521	19/18866	0.0955888	0.321718	0.266066	DLG4/BRINP1	2	geneontology_Biological_Process	0.00383877	Up
GO:0150079	GO:0150079	negative regulation of neuroinflammatory response	2/521	19/18866	0.0955888	0.321718	0.266066	CX3CL1/NR1D1	2	geneontology_Biological_Process	0.00383877	Up
GO:1990182	GO:1990182	exosomal secretion	2/521	19/18866	0.0955888	0.321718	0.266066	SDC4/RAB27A	2	geneontology_Biological_Process	0.00383877	Up
GO:0032411	GO:0032411	positive regulation of transporter activity	6/521	114/18866	0.0960844	0.322936	0.267074	TESC/STAC/CACNG4/CTSS/TMSB4X/TREM2	6	geneontology_Biological_Process	0.0115163	Up
GO:0070059	GO:0070059	intrinsic apoptotic signaling pathway in response to endoplasmic reticulum stress	4/521	63/18866	0.0961609	0.322936	0.267074	BBC3/LRRK2/RNF183/PMAIP1	4	geneontology_Biological_Process	0.00767754	Up
GO:0007586	GO:0007586	digestion	7/521	141/18866	0.0962076	0.322936	0.267074	UCN/KCNN4/NMU/PRSS2/INAVA/PRSS1/AQP5	7	geneontology_Biological_Process	0.0134357	Up
GO:0032755	GO:0032755	positive regulation of interleukin-6 production	5/521	88/18866	0.0963902	0.322936	0.267074	UCN/LPL/NOD1/F2R/INAVA	5	geneontology_Biological_Process	0.00959693	Up
GO:0090559	GO:0090559	regulation of membrane permeability	5/521	88/18866	0.0963902	0.322936	0.267074	BBC3/E2F1/BID/SFN/PMAIP1	5	geneontology_Biological_Process	0.00959693	Up
GO:1901879	GO:1901879	regulation of protein depolymerization	5/521	88/18866	0.0963902	0.322936	0.267074	SPTBN2/BMERB1/EPS8/TRIM54/STMN2	5	geneontology_Biological_Process	0.00959693	Up
GO:0048839	GO:0048839	inner ear development	9/521	197/18866	0.0965703	0.323294	0.26737	ABR/GABRB2/JAG2/GRHL3/HEY2/SDC4/ALDH1A3/HPN/CXCL14	9	geneontology_Biological_Process	0.0172745	Up
GO:0008037	GO:0008037	cell recognition	10/521	226/18866	0.0972583	0.325035	0.26881	NRCAM/EPHB3/MFGE8/CATSPER1/LGALS3/VSTM2L/TNFRSF21/FCN3/GAP43/NTM	10	geneontology_Biological_Process	0.0191939	Up
GO:0001990	GO:0001990	regulation of systemic arterial blood pressure by hormone	3/521	40/18866	0.0977539	0.325035	0.26881	ECE1/REN/F2R	3	geneontology_Biological_Process	0.00575816	Up
GO:0009187	GO:0009187	cyclic nucleotide metabolic process	3/521	40/18866	0.0977539	0.325035	0.26881	PDE9A/PDE5A/ADCY8	3	geneontology_Biological_Process	0.00575816	Up
GO:0010719	GO:0010719	negative regulation of epithelial to mesenchymal transition	3/521	40/18866	0.0977539	0.325035	0.26881	IL17RD/VASN/HPN	3	geneontology_Biological_Process	0.00575816	Up
GO:0030501	GO:0030501	positive regulation of bone mineralization	3/521	40/18866	0.0977539	0.325035	0.26881	TGFB1/KL/ALOX5	3	geneontology_Biological_Process	0.00575816	Up
GO:0043902	GO:0043902	positive regulation of multi-organism process	3/521	40/18866	0.0977539	0.325035	0.26881	PDE5A/BNC1/INHBB	3	geneontology_Biological_Process	0.00575816	Up
GO:0051281	GO:0051281	positive regulation of release of sequestered calcium ion into cytosol	3/521	40/18866	0.0977539	0.325035	0.26881	CX3CL1/F2R/APLNR	3	geneontology_Biological_Process	0.00575816	Up
GO:0140353	GO:0140353	lipid export from cell	3/521	40/18866	0.0977539	0.325035	0.26881	REN/RETN/SPP1	3	geneontology_Biological_Process	0.00575816	Up
GO:1902895	GO:1902895	positive regulation of pri-miRNA transcription by RNA polymerase II	3/521	40/18866	0.0977539	0.325035	0.26881	TGFB1/SREBF1/APLN	3	geneontology_Biological_Process	0.00575816	Up
GO:0043112	GO:0043112	receptor metabolic process	9/521	198/18866	0.0988495	0.328431	0.271618	TGFB1/ECE1/DLG4/NR1D1/ADM/APLN/CACNG4/APOE/RAMP1	9	geneontology_Biological_Process	0.0172745	Up
GO:0032874	GO:0032874	positive regulation of stress-activated MAPK cascade	8/521	170/18866	0.0995763	0.330461	0.273297	MAP3K6/TIAM1/TPD52L1/UNC5CL/EDA2R/NOD1/BIRC7/INAVA	8	geneontology_Biological_Process	0.0153551	Up
GO:0055074	GO:0055074	calcium ion homeostasis	18/521	468/18866	0.0996106	0.330461	0.273297	ADORA1/RYR1/ADRA1B/DLG4/CX3CL1/ADM/GPR4/NMU/KL/TRPC5/F2R/FAM20A/TGM2/ADCY8/APLNR/CD55/CCL13/APOE	18	geneontology_Biological_Process	0.0345489	Up
GO:0008625	GO:0008625	extrinsic apoptotic signaling pathway via death domain receptors	5/521	89/18866	0.0999478	0.330833	0.273604	BID/TNFRSF10C/LGALS3/ICAM1/PMAIP1	5	geneontology_Biological_Process	0.00959693	Up
GO:0014033	GO:0014033	neural crest cell differentiation	5/521	89/18866	0.0999478	0.330833	0.273604	SEMA6B/FN1/SEMA3F/NRP2/WNT10A	5	geneontology_Biological_Process	0.00959693	Up
GO:1903845	GO:1903845	negative regulation of cellular response to transforming growth factor beta stimulus	5/521	89/18866	0.0999478	0.330833	0.273604	TGFB1/IL17RD/TGFBR1/VASN/CD109	5	geneontology_Biological_Process	0.00959693	Up
GO:0045453	GO:0045453	bone resorption	4/521	64/18866	0.100459	0.331531	0.274182	NOX4/DCSTAMP/SIGLEC15/SPP1	4	geneontology_Biological_Process	0.00767754	Up
GO:0046637	GO:0046637	regulation of alpha-beta T cell differentiation	4/521	64/18866	0.100459	0.331531	0.274182	RUNX1/PRDM1/ANXA1/PNP	4	geneontology_Biological_Process	0.00767754	Up
[truncated: 3,258 more rows]
